# Supplementary material for: Consensus virtual screening of dark chemical matter and food chemicals uncover potential inhibitors of SARS-CoV-2 main protease
Source: Royal Society of Chemistry journal article supplement (doi:10.1039/d0ra04922k), 2020-01-01
Supplement: d0ra04922k1.xlsx [file d0ra04922k1.xlsx]

## Sheet: hits_ZINC_ID
ID	SET	ZINC	Availability	Group
DBB10063	foodb_mfsm	ZINC196584583	Orphaned	NA
DBB10073	foodb_mfsm	NA	NA	group_3
DBB10128	foodb_mfsm	NA	NA	NA
DBB10149	foodb_mfsm	NA	NA	group_3
DBB10150	foodb_mfsm	NA	NA	NA
DBB10167	foodb_mfsm	NA	NA	NA
DBB10185	foodb_mfsm	NA	NA	NA
DBB10210	foodb_mfsm	ZINC219287796	Orphaned	NA
DBB10732	foodb_mfsm	NA	NA	NA
DBB11539	foodb_mfsm	ZINC2037536	For-sale	NA
DBB11743	foodb_mfsm	ZINC3812863	In-Stock	NA
DBB11880	foodb_mfsm	ZINC20228	In-Stock	NA
DBB11882	foodb_mfsm	ZINC2509772	In-Stock	NA
DBB11884	foodb_mfsm	ZINC39798	In-Stock	NA
DBB11895	foodb_mfsm	ZINC402813	In-Stock	NA
DBB11972	foodb_mfsm	ZINC83028	In-Stock	NA
DBB12105	foodb_mfsm	ZINC1687400	In-Stock	NA
DBB12224	foodb_40	ZINC14819551	For-sale	NA
DBB12241	foodb_40	ZINC4098607	In-Stock	NA
DBB12292	foodb_40	ZINC33829879	In-Stock	group_2
DBB12343	foodb_40	ZINC714631	In-Stock	NA
DBB12401	foodb_40	ZINC100466527	Annotated	NA
DBB12536	foodb_40	ZINC13340605	In-Stock	NA
DBB12590	foodb_40	ZINC14455079	For-sale	NA
DBB12644	foodb_40	ZINC519823	In-Stock	NA
DBB12675	foodb_mfsm	ZINC2005305	In-Stock	NA
DBB12677	foodb_mfsm	ZINC9212425	In-Stock	NA
DBB12845	foodb_mfsm	ZINC12496906	Annotated	NA
DBB12848	foodb_mfsm	ZINC11536135	In-Stock	NA
DBB12974	foodb_mfsm	ZINC9212425	In-Stock	NA
DBB12985	foodb_mfsm	ZINC9212426	In-Stock	NA
DBB12988	foodb_mfsm	ZINC4228293	For-sale	group_3
DBB13002	foodb_mfsm	ZINC2005305	In-Stock	group_1
DBB13044	foodb_40	ZINC13677763	In-Stock	NA
DBB13116	foodb_40	ZINC14887284	Annotated	NA
DBB13135	foodb_40	ZINC95620433	Annotated	NA
DBB13317	foodb_40	ZINC14775344	Annotated	NA
DBB13483	foodb_mfsm	ZINC5283951	In-Stock	group_1
DBB13536	foodb_40	ZINC14455081	For-sale	NA
DBB13550	foodb_40	ZINC14455494	Annotated	NA
DBB13565	foodb_mfsm	ZINC70455164	For-sale	NA
DBB13569	foodb_40	ZINC15055024	Annotated	NA
DBB13716	fooddb_dl_mfsm	ZINC14591305	Annotated	NA
DBB13793	foodb_40	ZINC13130926	In-Stock	NA
DBB13805	foodb_40	ZINC13307719	Annotated	NA
DBB13825	foodb_mfsm	ZINC4228235	In-Stock	group_1
DBB13830	foodb_mfsm	ZINC62233495	In-Stock	NA
DBB13831	foodb_mfsm	ZINC389661	In-Stock	NA
DBB13839	foodb_mfsm	ZINC4228265	In-Stock	NA
DBB13916	foodb_mfsm	ZINC4228266	In-Stock	NA
DBB13917	foodb_mfsm	ZINC2036915	In-Stock	group_1
DBB13919	foodb_mfsm	ZINC4228265	In-Stock	group_1
DBB13958	fooddb_dl_mfsm	ZINC14824027	In-Stock	NA
DBB14051	foodb_40	ZINC14686331	Annotated	NA
DBB14117	foodb_40	ZINC13481267	Annotated	NA
DBB14118	foodb_40	ZINC13481257	Annotated	NA
DBB14163	foodb_mfsm	ZINC8577218	In-Stock	group_1
DBB14180	foodb_mfsm	ZINC388061	In-Stock	NA
DBB14287	foodb_40	ZINC14455491	Annotated	NA
DBB14346	fooddb_dl_mfsm	ZINC3641060	In-Stock	NA
DBB14485	foodb_40	ZINC14652174	For-sale	NA
DBB14496	foodb_40	ZINC14687788	Annotated	NA
DBB14512	foodb_40	ZINC14686295	Annotated	NA
DBB14677	foodb_40	ZINC4448	In-Stock	NA
DBB14678	foodb_40	ZINC968328	In-Stock	NA
DBB1474	foodb_mfsm	ZINC17596232	In-Stock	group_2
DBB15017	foodb_40	ZINC1530575	In-Stock	NA
DBB15079	foodb_mfsm	ZINC14502737	Annotated	NA
DBB15086	foodb_mfsm	ZINC3819459	In-Stock	group_2
DBB15253	foodb_mfsm	ZINC13515889	On-demand	group_4
DBB15434	foodb_mfsm	ZINC4899436	In-Stock	NA
DBB1548	foodb_mfsm	ZINC85589300	Annotated	NA
DBB1549	foodb_mfsm	ZINC85589330	Annotated	NA
DBB15647	foodb_40	ZINC5757941	In-Stock	NA
DBB15649	foodb_40	ZINC5358329	For-sale	NA
DBB15744	foodb_mfsm	ZINC15216617	In-Stock	NA
DBB15928	foodb_mfsm	ZINC1849924	On-demand	NA
DBB16004	foodb_40	ZINC14616908	Annotated	NA
DBB16042	fooddb_dl_mfsm	ZINC1697652	In-Stock	NA
DBB16230	foodb_mfsm	ZINC4096261	In-Stock	NA
DBB16241	foodb_mfsm	ZINC2510107	On-demand	NA
DBB16251	foodb_mfsm	ZINC1677783	In-Stock	NA
DBB16255	foodb_mfsm	ZINC1673347	In-Stock	NA
DBB16295	foodb_mfsm	ZINC14681995	Annotated	group_3
DBB16360	foodb_mfsm	ZINC96014344	Annotated	NA
DBB16417	foodb_40	ZINC14651624	In-Stock	NA
DBB16429	foodb_40	ZINC1850768	On-demand	NA
DBB16430	foodb_mfsm	ZINC6095202	For-sale	group_4
DBB16540	fooddb_dl_mfsm	ZINC43284710	Annotated	NA
DBB16543	foodb_40	ZINC5358301	Annotated	NA
DBB16828	foodb_mfsm	ZINC2032981	On-demand	group_4
DBB16900	foodb_mfsm	ZINC1704714	In-Stock	NA
DBB16914	foodb_mfsm	ZINC13386793	Annotated	group_3
DBB16933	foodb_40	ZINC988101	In-Stock	NA
DBB16948	foodb_mfsm	ZINC13386793	Annotated	group_3
DBB16996	foodb_mfsm	ZINC6095202	For-sale	NA
DBB1701	foodb_mfsm	ZINC42803293	Annotated	NA
DBB17037	foodb_mfsm	ZINC4090721	In-Stock	NA
DBB17114	foodb_mfsm	ZINC4090721	In-Stock	group_1
DBB17132	foodb_mfsm	ZINC20431033	In-Stock	group_1
DBB17529	foodb_40	ZINC1850772	In-Stock	NA
DBB17840	fooddb_dl_mfsm	ZINC14592636	Annotated	NA
DBB18117	foodb_40	ZINC8700366	For-sale	NA
DBB18440	foodb_mfsm	ZINC323	In-Stock	NA
DBB18441	foodb_mfsm	ZINC324	In-Stock	NA
DBB18448	fooddb_dl_mfsm	ZINC14445256	Annotated	NA
DBB18508	foodb_mfsm	ZINC12343956	In-Stock	NA
DBB18566	foodb_mfsm	ZINC85589828	Annotated	NA
DBB18573	foodb_mfsm	ZINC2115314	In-Stock	NA
DBB18574	foodb_mfsm	ZINC2392313	In-Stock	NA
DBB18622	foodb_mfsm	ZINC3869369	For-sale	NA
DBB18650	foodb_mfsm	ZINC14610482	Annotated	NA
DBB18686	foodb_40	ZINC410079	In-Stock	NA
DBB18711	foodb_mfsm	ZINC2159	In-Stock	NA
DBB18741	foodb_mfsm	ZINC15261559	Annotated	NA
DBB18790	foodb_mfsm	ZINC6090924	In-Stock	NA
DBB18939	foodb_mfsm	ZINC33641277	For-sale	NA
DBB18947	foodb_mfsm	ZINC1303441	In-Stock	group_1
DBB18948	foodb_mfsm	ZINC2159	In-Stock	NA
DBB18949	foodb_mfsm	ZINC4253	In-Stock	NA
DBB18950	foodb_mfsm	ZINC155696	In-Stock	NA
DBB18961	foodb_mfsm	ZINC4321512	In-Stock	group_1
DBB19150	fooddb_dl_mfsm	ZINC1547195	In-Stock	NA
DBB19348	foodb_mfsm	ZINC56507	In-Stock	NA
DBB194	foodb_40	ZINC5821119	In-Stock	NA
DBB19465	foodb_mfsm	ZINC1574407	In-Stock	NA
DBB19606	foodb_mfsm	ZINC1916	In-Stock	NA
DBB19618	foodb_mfsm	ZINC2564475	In-Stock	NA
DBB19621	foodb_mfsm	ZINC5392428	On-demand	NA
DBB19651	foodb_mfsm	ZINC83665	In-Stock	group_2
DBB19680	foodb_mfsm	ZINC404262	In-Stock	NA
DBB19690	foodb_mfsm	ZINC13373496	For-sale	NA
DBB19698	foodb_mfsm	ZINC1529869	In-Stock	NA
DBB19715	foodb_mfsm	ZINC2040854	In-Stock	group_1
DBB19716	foodb_mfsm	ZINC135391	In-Stock	NA
DBB19719	foodb_mfsm	ZINC1532770	In-Stock	group_1
DBB19720	foodb_mfsm	ZINC12496588	Annotated	NA
DBB19731	foodb_mfsm	ZINC2525827	In-Stock	NA
DBB19732	foodb_mfsm	ZINC2040854	In-Stock	NA
DBB19733	foodb_mfsm	ZINC13542046	Annotated	NA
DBB19734	foodb_mfsm	ZINC2242693	In-Stock	NA
DBB19735	foodb_mfsm	ZINC19334332	In-Stock	NA
DBB19736	foodb_mfsm	ZINC2040854	In-Stock	group_1
DBB19769	foodb_mfsm	ZINC14503322	For-sale	NA
DBB19858	foodb_mfsm	ZINC388112	In-Stock	NA
DBB20185	foodb_mfsm	ZINC2242693	In-Stock	group_1
DBB20248	foodb_mfsm	ZINC145536	In-Stock	NA
DBB20374	foodb_mfsm	ZINC8584773	In-Stock	NA
DBB20523	foodb_mfsm	ZINC5425259	In-Stock	NA
DBB20576	foodb_mfsm	ZINC1408068	In-Stock	NA
DBB20616	foodb_mfsm	ZINC14684261	For-sale	NA
DBB21123	foodb_mfsm	ZINC100070489	In-Stock	NA
DBB21709	foodb_mfsm	ZINC6534965	In-Stock	group_2
DBB21712	foodb_mfsm	ZINC6092467	In-Stock	NA
DBB21720	foodb_mfsm	ZINC6092468	In-Stock	NA
DBB21778	foodb_mfsm	ZINC8738372	In-Stock	NA
DBB21790	foodb_mfsm	ZINC14445254	Annotated	NA
DBB21795	foodb_mfsm	ZINC1728129	In-Stock	group_2
DBB21801	foodb_mfsm	ZINC895903	For-sale	group_4
DBB21804	foodb_mfsm	ZINC66104	In-Stock	NA
DBB21815	foodb_mfsm	ZINC15116102	For-sale	group_4
DBB21856	foodb_mfsm	ZINC1530233	For-sale	group_4
DBB21857	foodb_mfsm	ZINC895813	In-Stock	group_1
DBB21882	foodb_mfsm	ZINC156395	In-Stock	NA
DBB21918	foodb_mfsm	ZINC13306629	For-sale	NA
DBB21925	foodb_mfsm	ZINC12153244	Annotated	NA
DBB2423	foodb_mfsm	ZINC49878068	In-Stock	NA
DBB2444	foodb_mfsm	ZINC14952106	In-Stock	NA
DBB2455	foodb_mfsm	ZINC53057130	In-Stock	group_1
DBB258	foodb_mfsm	ZINC1851149	In-Stock	NA
DBB2649	foodb_mfsm	ZINC85811374	Annotated	NA
DBB2650	foodb_mfsm	ZINC85811393	Annotated	NA
DBB2682	foodb_mfsm	ZINC106401122	For-sale	NA
DBB2790	foodb_mfsm	ZINC4217536	In-Stock	group_1
DBB287	foodb_40	ZINC3860715	In-Stock	group_2
DBB3381	foodb_mfsm	ZINC49878070	Annotated	group_4
DBB3508	foodb_mfsm	ZINC256003151	In-Stock	NA
DBB3532	foodb_mfsm	ZINC936070050	For-sale	NA
DBB3724	foodb_mfsm	ZINC49878225	For-sale	NA
DBB3757	foodb_mfsm	ZINC14951634	In-Stock	NA
DBB3940	foodb_mfsm	ZINC49878197	For-sale	NA
DBB4100	foodb_mfsm	ZINC49878510	For-sale	group_4
DBB4117	foodb_mfsm	ZINC14951658	In-Stock	NA
DBB414	foodb_mfsm	ZINC85836414	In-Stock	NA
DBB4197	foodb_mfsm	ZINC238735858	Annotated	group_3
DBB4298	foodb_mfsm	ZINC42887688	Annotated	group_4
DBB4378	foodb_mfsm	ZINC85589305	Annotated	group_3
DBB4438	foodb_mfsm	ZINC238763863	Annotated	group_3
DBB4527	foodb_mfsm	ZINC49878303	For-sale	group_4
DBB4722	foodb_mfsm	ZINC221900144	Orphaned	group_3
DBB5090	foodb_mfsm	ZINC238753943	Annotated	group_4
DBB5126	foodb_mfsm	ZINC238759156	Annotated	group_3
DBB5373	foodb_mfsm	ZINC199630380	Annotated	group_3
DBB5448	foodb_mfsm	ZINC85974762	Annotated	group_4
DBB5554	foodb_mfsm	ZINC85545908	In-Stock	group_1
DBB5697	foodb_mfsm	ZINC150350668	Annotated	NA
DBB5698	foodb_mfsm	ZINC199630461	Annotated	group_3
DBB5793	foodb_mfsm	ZINC238737589	Annotated	group_3
DBB604	foodb_40	ZINC3831171	In-Stock	NA
DBB6260	foodb_mfsm	ZINC196084903	Annotated	NA
DBB6281	foodb_mfsm	ZINC162461333	Annotated	group_4
DBB6621	foodb_mfsm	ZINC230135941	Orphaned	group_3
DBB7131	foodb_mfsm	ZINC196695229	Orphaned	NA
DBB7393	foodb_mfsm	ZINC199630122	Orphaned	group_3
DBB8083	foodb_mfsm	ZINC169289390	In-Stock	NA
DBB8084	foodb_mfsm	ZINC169621177	Orphaned	group_3
DBB8351	foodb_mfsm	ZINC169365415	Annotated	group_3
DBB8912	foodb_mfsm	ZINC196567547	Orphaned	NA
DBB8933	foodb_mfsm	NA	NA	NA
DBB9251	foodb_mfsm	ZINC257454808	Annotated	NA
DBB9450	foodb_mfsm	ZINC169676920	In-Stock	group_1
DBB9451	foodb_mfsm	ZINC169677001	Orphaned	group_3
DBB9622	foodb_mfsm	NA	NA	group_3
DBB9626	foodb_mfsm	ZINC206767946	Orphaned	group_3
DBB9867	foodb_mfsm	NA	NA	NA
DBB9961	foodb_mfsm	NA	NA	NA
DCM100585	dcm_500	ZINC13470803	On-demand	NA
DCM100767	dcm_500	ZINC9499471	On-demand	NA
DCM101079	dcm_500	ZINC257367481	In-Stock	NA
DCM101081	dcm_500	ZINC8790857	In-Stock	NA
DCM101256	dcm_500	ZINC12551241	On-demand	NA
DCM101792	dcm_500	ZINC100777860	In-Stock	NA
DCM102547	dcm_500	ZINC169355303	Annotated	NA
DCM102551	dcm_500	ZINC95570847	Annotated	NA
DCM102556	dcm_500	ZINC169355851	Annotated	group_3
DCM102568	dcm_500	ZINC95850810	Annotated	NA
DCM102570	dcm_500	ZINC95857328	Annotated	NA
DCM102579	dcm_500	ZINC95846236	Annotated	NA
DCM102581	dcm_500	ZINC72136539	Annotated	NA
DCM102583	dcm_500	ZINC95836883	Annotated	NA
DCM102610	dcm_500	ZINC95860588	Annotated	NA
DCM102611	dcm_500	ZINC95856010	Annotated	NA
DCM102617	dcm_500	ZINC95853867	Annotated	NA
DCM102624	dcm_500	ZINC95750324	Annotated	NA
DCM102625	dcm_500	ZINC72122090	Annotated	NA
DCM102767	dcm_500	ZINC61923379	Annotated	NA
DCM102768	dcm_500	ZINC61923362	Annotated	NA
DCM102814	dcm_500	ZINC95782268	Annotated	NA
DCM103705	dcm_mfsm	ZINC100090369	In-Stock	NA
DCM10397	dcm_mfsm	ZINC8204861	In-Stock	NA
DCM104065	dcm_mfsm	ZINC100058440	In-Stock	NA
DCM104377	dcm_mfsm	ZINC318559	In-Stock	NA
DCM10478	dcm_500	ZINC4083870	In-Stock	group_1
DCM10517	dcm_500	ZINC38146625	Annotated	NA
DCM105230	dcm_mfsm	ZINC1400363	In-Stock	NA
DCM105452	dcm_mfsm	ZINC2628637	In-Stock	NA
DCM105604	dcm_mfsm	ZINC2866180	In-Stock	NA
DCM105893	dcm_mfsm	ZINC3330082	On-demand	NA
DCM10630	dcm_500	ZINC15935314	Annotated	NA
DCM106485	dcm_500	ZINC5074097	In-Stock	NA
DCM106505	dcm_500	ZINC11752110	In-Stock	NA
DCM106523	dcm_500	ZINC2898785	In-Stock	NA
DCM106536	dcm_mfsm	ZINC860031	In-Stock	NA
DCM106662	dcm_500	ZINC13153193	In-Stock	NA
DCM106741	dcm_mfsm	ZINC15919230	In-Stock	NA
DCM107015	dcm_500	ZINC38145744	In-Stock	NA
DCM107080	dcm_500	ZINC38146009	In-Stock	NA
DCM1071	dcm_mfsm	ZINC8772823	On-demand	NA
DCM107126	dcm_500	ZINC8680719	In-Stock	NA
DCM107128	dcm_500	ZINC13085464	In-Stock	NA
DCM107142	dcm_500	ZINC38145126	In-Stock	NA
DCM107184	dcm_mfsm	ZINC4004904	In-Stock	NA
DCM107328	dcm_500	ZINC2560871	In-Stock	NA
DCM107408	dcm_mfsm	ZINC4384958	In-Stock	NA
DCM108061	dcm_mfsm	ZINC6788526	On-demand	NA
DCM108385	dcm_mfsm	ZINC6839361	On-demand	NA
DCM108903	dcm_500	ZINC3239871	For-sale	NA
DCM108925	dcm_mfsm	ZINC3906583	In-Stock	NA
DCM109307	dcm_mfsm	ZINC7988822	In-Stock	NA
DCM109524	dcm_mfsm	ZINC254868673	On-demand	NA
DCM109854	dcm_500	ZINC13572542	For-sale	NA
DCM109962	dcm_500	ZINC6389742	For-sale	NA
DCM110206	dcm_500	ZINC12652624	In-Stock	group_1
DCM110208	dcm_500	ZINC38140334	In-Stock	NA
DCM110214	dcm_500	ZINC34805301	In-Stock	group_1
DCM110215	dcm_500	ZINC38144954	In-Stock	NA
DCM110932	dcm_500	ZINC15937348	Annotated	NA
DCM111002	dcm_mfsm	ZINC61969842	Annotated	NA
DCM111131	dcm_mfsm	ZINC12440519	In-Stock	NA
DCM111646	dcm_500	ZINC66136436	Annotated	NA
DCM111656	dcm_500	ZINC66157621	Annotated	NA
DCM111680	dcm_500	ZINC66123724	Annotated	NA
DCM111688	dcm_500	ZINC66166883	Annotated	NA
DCM111689	dcm_500	ZINC95570375	Annotated	NA
DCM111691	dcm_500	ZINC95856954	Annotated	NA
DCM111724	dcm_500	ZINC95856053	Annotated	NA
DCM111767	dcm_500	ZINC66148827	Annotated	NA
DCM111769	dcm_500	ZINC95567760	Annotated	group_4
DCM111793	dcm_500	ZINC61943207	Annotated	NA
DCM11183	dcm_500	ZINC66136602	Annotated	NA
DCM111831	dcm_500	ZINC72136007	Annotated	NA
DCM11184	dcm_500	ZINC61948584	Annotated	NA
DCM11186	dcm_500	ZINC169355851	Annotated	NA
DCM111879	dcm_500	ZINC61923654	Annotated	NA
DCM111886	dcm_500	ZINC61923466	Annotated	NA
DCM111921	dcm_500	ZINC95728146	Annotated	NA
DCM11194	dcm_500	ZINC169299471	Annotated	NA
DCM111940	dcm_500	ZINC95782754	Annotated	NA
DCM11198	dcm_500	ZINC169355503	Annotated	NA
DCM11203	dcm_500	ZINC61948278	Annotated	NA
DCM11222	dcm_500	ZINC95850761	Annotated	NA
DCM112277	dcm_500	ZINC72137733	Annotated	NA
DCM112282	dcm_500	ZINC169342036	Annotated	NA
DCM11256	dcm_500	ZINC95771486	Annotated	NA
DCM11292	dcm_500	ZINC72126847	Annotated	NA
DCM11349	dcm_mfsm	ZINC12090996	Annotated	NA
DCM11404	dcm_500	ZINC169331643	Annotated	NA
DCM11416	dcm_500	ZINC61923532	Annotated	NA
DCM11434	dcm_500	ZINC95872844	Annotated	NA
DCM11470	dcm_500	ZINC61921509	Annotated	NA
DCM11492	dcm_500	ZINC72134909	Annotated	NA
DCM115688	dcm_mfsm	ZINC3456922	On-demand	NA
DCM116004	dcm_500	ZINC38145977	In-Stock	NA
DCM116068	dcm_500	ZINC13084860	In-Stock	NA
DCM116147	dcm_mfsm	ZINC4004841	In-Stock	NA
DCM116339	dcm_mfsm	ZINC2619815	For-sale	NA
DCM116476	dcm_500	ZINC3348288	In-Stock	NA
DCM116718	dcm_mfsm	ZINC2970808	For-sale	NA
DCM116923	dcm_mfsm	ZINC2970717	In-Stock	group_1
DCM117144	dcm_mfsm	ZINC16045304	On-demand	NA
DCM117957	dcm_500	ZINC4083908	In-Stock	NA
DCM118111	dcm_500	ZINC6559910	For-sale	NA
DCM11820	dcm_500	ZINC169303573	Annotated	NA
DCM118269	dcm_mfsm	ZINC8388774	On-demand	group_3
DCM118920	dcm_500	ZINC7942465	For-sale	NA
DCM119142	dcm_500	ZINC8791150	In-Stock	NA
DCM119143	dcm_500	ZINC100777425	In-Stock	NA
DCM119144	dcm_500	ZINC102027893	In-Stock	NA
DCM119341	dcm_500	ZINC9450208	In-Stock	NA
DCM119353	dcm_500	ZINC9409555	In-Stock	group_1
DCM119745	dcm_500	ZINC9833737	In-Stock	NA
DCM119973	dcm_500	ZINC11874677	In-Stock	NA
DCM119988	dcm_mfsm	ZINC15936005	Annotated	NA
DCM120016	dcm_mfsm	ZINC12712665	Annotated	NA
DCM120026	dcm_500	ZINC15935146	Annotated	group_3
DCM120044	dcm_500	ZINC15934989	Annotated	NA
DCM120505	dcm_500	ZINC13831413	On-demand	NA
DCM120617	dcm_500	ZINC169355303	Annotated	NA
DCM120619	dcm_500	ZINC169355851	Annotated	NA
DCM120625	dcm_500	ZINC169355503	Annotated	NA
DCM120642	dcm_500	ZINC95855574	Annotated	NA
DCM120705	dcm_500	ZINC95776291	Annotated	NA
DCM120792	dcm_500	ZINC61942295	Annotated	NA
DCM120854	dcm_500	ZINC61923480	Annotated	NA
DCM120855	dcm_500	ZINC61923463	Annotated	NA
DCM120927	dcm_500	ZINC72102309	Annotated	NA
DCM121058	dcm_mfsm	ZINC61908391	Annotated	NA
DCM121215	dcm_500	ZINC61902170	On-demand	NA
DCM121306	dcm_500	ZINC199363013	Annotated	NA
DCM121309	dcm_500	ZINC72139798	Annotated	NA
DCM121905	dcm_500	ZINC4399805	In-Stock	NA
DCM122034	dcm_500	ZINC15990331	In-Stock	group_1
DCM122070	dcm_mfsm	ZINC101644491	For-sale	NA
DCM123088	dcm_mfsm	ZINC1160841	In-Stock	NA
DCM1231	dcm_mfsm	ZINC1404000	In-Stock	NA
DCM12339	dcm_mfsm	ZINC101009591	In-Stock	NA
DCM123458	dcm_500	ZINC2635927	For-sale	NA
DCM123539	dcm_mfsm	ZINC2712773	In-Stock	NA
DCM123762	dcm_500	ZINC3260018	For-sale	NA
DCM1239	dcm_mfsm	ZINC2712819	Annotated	NA
DCM124462	dcm_500	ZINC82138162	In-Stock	NA
DCM124534	dcm_500	ZINC711242	In-Stock	NA
DCM124986	dcm_500	ZINC6511225	In-Stock	NA
DCM12522	dcm_500	ZINC4354879	In-Stock	NA
DCM125230	dcm_500	ZINC4103876	Annotated	NA
DCM125797	dcm_500	ZINC3222638	On-demand	NA
DCM125972	dcm_mfsm	ZINC425384	In-Stock	group_2
DCM126140	dcm_500	ZINC3615044	On-demand	NA
DCM126456	dcm_mfsm	ZINC12539949	On-demand	NA
DCM126555	dcm_500	ZINC9689	In-Stock	NA
DCM126982	dcm_mfsm	ZINC4985777	In-Stock	NA
DCM127471	dcm_500	ZINC100998397	Annotated	NA
DCM127745	dcm_mfsm	ZINC13636760	Annotated	group_3
DCM127982	dcm_500	ZINC12617123	On-demand	NA
DCM128167	dcm_500	ZINC8277752	On-demand	NA
DCM128220	dcm_500	ZINC12877012	In-Stock	NA
DCM128225	dcm_500	ZINC38139990	In-Stock	NA
DCM128922	dcm_500	ZINC38146628	Annotated	group_3
DCM129628	dcm_500	ZINC66136436	Annotated	group_3
DCM129636	dcm_500	ZINC169355851	Annotated	group_3
DCM129644	dcm_500	ZINC169355852	Annotated	NA
DCM129654	dcm_500	ZINC95854205	Annotated	NA
DCM129663	dcm_500	ZINC72132502	Annotated	NA
DCM129665	dcm_500	ZINC72135992	Annotated	NA
DCM129668	dcm_500	ZINC95833100	Annotated	NA
DCM129712	dcm_500	ZINC95751822	Annotated	NA
DCM129859	dcm_500	ZINC95569981	Annotated	NA
DCM129869	dcm_500	ZINC61923563	Annotated	NA
DCM129910	dcm_500	ZINC95834702	Annotated	NA
DCM129923	dcm_500	ZINC61921677	Annotated	NA
DCM130132	dcm_mfsm	ZINC61906461	Annotated	NA
DCM130317	dcm_500	ZINC199363106	Annotated	NA
DCM130382	dcm_500	ZINC72135877	Annotated	NA
DCM130776	dcm_mfsm	ZINC3249447	On-demand	NA
DCM130786	dcm_mfsm	ZINC13682971	On-demand	NA
DCM130893	dcm_500	ZINC609463	In-Stock	NA
DCM131519	dcm_500	ZINC15937268	Annotated	group_3
DCM131653	dcm_500	ZINC61921935	Annotated	NA
DCM131779	dcm_500	ZINC9159501	In-Stock	group_1
DCM131780	dcm_500	ZINC12867188	In-Stock	NA
DCM131781	dcm_500	ZINC8918305	In-Stock	NA
DCM131782	dcm_500	ZINC2126038	In-Stock	group_1
DCM131783	dcm_500	ZINC15954557	In-Stock	group_1
DCM131967	dcm_500	ZINC2572719	In-Stock	NA
DCM132655	dcm_500	ZINC1640072	In-Stock	NA
DCM132728	dcm_500	ZINC2390934	In-Stock	NA
DCM133150	dcm_500	ZINC392029	In-Stock	NA
DCM133197	dcm_500	ZINC22053590	In-Stock	NA
DCM133239	dcm_500	ZINC392029	In-Stock	NA
DCM133405	dcm_500	ZINC22051129	In-Stock	NA
DCM134950	dcm_500	ZINC70699477	In-Stock	NA
DCM135396	dcm_mfsm	ZINC1069943	In-Stock	NA
DCM135447	dcm_500	ZINC15953660	In-Stock	NA
DCM136080	dcm_500	ZINC3336698	For-sale	NA
DCM136090	dcm_500	ZINC100773053	In-Stock	NA
DCM136196	dcm_500	ZINC5451205	In-Stock	NA
DCM136998	dcm_500	ZINC4029165	In-Stock	NA
DCM137295	dcm_mfsm	ZINC2721567	In-Stock	NA
DCM137409	dcm_500	ZINC101381419	In-Stock	NA
DCM137482	dcm_500	ZINC12305741	Orphaned	NA
DCM138166	dcm_500	ZINC3319418	On-demand	NA
DCM138630	dcm_mfsm	ZINC1385904	In-Stock	NA
DCM138633	dcm_mfsm	ZINC1385935	In-Stock	NA
DCM138767	dcm_500	ZINC8918166	In-Stock	NA
DCM138768	dcm_500	ZINC12863416	In-Stock	NA
DCM138770	dcm_500	ZINC15996876	In-Stock	NA
DCM138772	dcm_500	ZINC6262872	In-Stock	NA
DCM138773	dcm_500	ZINC8918114	In-Stock	NA
DCM138775	dcm_500	ZINC12866692	In-Stock	NA
DCM14135	dcm_500	ZINC2656890	For-sale	NA
DCM15251	dcm_500	ZINC2856704	In-Stock	NA
DCM15692	dcm_500	ZINC13508190	In-Stock	NA
DCM15835	dcm_500	ZINC4111247	Annotated	NA
DCM15926	dcm_500	ZINC4077285	For-sale	NA
DCM15992	dcm_500	ZINC59880538	Annotated	NA
DCM16070	dcm_mfsm	ZINC2944264	On-demand	NA
DCM1641	dcm_mfsm	ZINC155882	In-Stock	NA
DCM16704	dcm_500	ZINC5688894	For-sale	NA
DCM1693	dcm_mfsm	ZINC3029994	In-Stock	NA
DCM17142	dcm_500	ZINC5144075	For-sale	NA
DCM173	dcm_500	ZINC4778556	In-Stock	NA
DCM1734	dcm_500	ZINC38144946	In-Stock	NA
DCM17549	dcm_mfsm	ZINC4504697	Annotated	NA
DCM17562	dcm_500	ZINC13085270	In-Stock	NA
DCM17563	dcm_500	ZINC13085281	In-Stock	NA
DCM17867	dcm_500	ZINC5271911	In-Stock	NA
DCM17924	dcm_mfsm	ZINC16051118	In-Stock	NA
DCM18339	dcm_500	ZINC3614485	In-Stock	NA
DCM18340	dcm_500	ZINC4935073	For-sale	NA
DCM18430	dcm_500	ZINC13830005	For-sale	NA
DCM18438	dcm_500	ZINC13470785	On-demand	NA
DCM18596	dcm_500	ZINC13544167	For-sale	NA
DCM18745	dcm_500	ZINC5078554	For-sale	NA
DCM18767	dcm_500	ZINC7990604	On-demand	NA
DCM18900	dcm_mfsm	ZINC9779632	In-Stock	NA
DCM18934	dcm_500	ZINC252694432	In-Stock	NA
DCM19009	dcm_500	ZINC212928002	Orphaned	NA
DCM19037	dcm_mfsm	ZINC72135831	Annotated	NA
DCM1911	dcm_500	ZINC3791297	In-Stock	NA
DCM193	dcm_500	ZINC38144948	In-Stock	NA
DCM1943	dcm_500	ZINC70699844	In-Stock	NA
DCM19604	dcm_500	ZINC12476856	Annotated	group_3
DCM19640	dcm_500	ZINC15937252	Annotated	NA
DCM19642	dcm_500	ZINC38146639	Annotated	NA
DCM20352	dcm_500	ZINC169355303	Annotated	NA
DCM20357	dcm_500	ZINC169355851	Annotated	NA
DCM20359	dcm_500	ZINC66157621	Annotated	group_3
DCM20364	dcm_500	ZINC61948536	Annotated	NA
DCM20374	dcm_500	ZINC95847208	Annotated	NA
DCM20394	dcm_500	ZINC95846725	Annotated	NA
DCM20395	dcm_500	ZINC61947666	Annotated	NA
DCM20399	dcm_500	ZINC95568176	Annotated	NA
DCM20401	dcm_500	ZINC95823079	Annotated	NA
DCM20430	dcm_500	ZINC95823317	Annotated	NA
DCM20466	dcm_500	ZINC72127725	Annotated	NA
DCM20496	dcm_500	ZINC66123943	Annotated	NA
DCM20663	dcm_500	ZINC61921013	Annotated	NA
DCM20774	dcm_500	ZINC61908629	Annotated	NA
DCM20915	dcm_mfsm	ZINC61903220	Annotated	NA
DCM21004	dcm_500	ZINC72105166	Annotated	NA
DCM21297	dcm_500	ZINC1165939	In-Stock	NA
DCM2130	dcm_500	ZINC8918437	In-Stock	NA
DCM22061	dcm_mfsm	ZINC318576	In-Stock	NA
DCM22284	dcm_mfsm	ZINC475842	In-Stock	NA
DCM2230	dcm_500	ZINC13085325	In-Stock	NA
DCM22786	dcm_mfsm	ZINC1161652	In-Stock	NA
DCM2279	dcm_500	ZINC38144961	In-Stock	group_1
DCM23269	dcm_mfsm	ZINC2712814	For-sale	NA
DCM2376	dcm_mfsm	ZINC3314988	In-Stock	NA
DCM2441	dcm_mfsm	ZINC5007394	Annotated	NA
DCM24561	dcm_500	ZINC3307701	On-demand	group_3
DCM2475	dcm_500	ZINC12662282	In-Stock	NA
DCM2478	dcm_500	ZINC38139999	In-Stock	NA
DCM24841	dcm_500	ZINC4875855	In-Stock	NA
DCM25237	dcm_500	ZINC13145032	Annotated	NA
DCM25329	dcm_mfsm	ZINC13687118	On-demand	NA
DCM25561	dcm_mfsm	ZINC3631957	In-Stock	NA
DCM25687	dcm_mfsm	ZINC13523881	In-Stock	NA
DCM25738	dcm_500	ZINC102280376	For-sale	NA
DCM25765	dcm_mfsm	ZINC2103103	In-Stock	NA
DCM2585	dcm_500	ZINC861971	In-Stock	NA
DCM2598	dcm_500	ZINC8763130	In-Stock	NA
DCM26048	dcm_mfsm	ZINC57270834	On-demand	NA
DCM26057	dcm_mfsm	ZINC3349915	On-demand	NA
DCM26062	dcm_mfsm	ZINC3341566	For-sale	NA
DCM26714	dcm_500	ZINC13566692	In-Stock	NA
DCM26981	dcm_500	ZINC5271911	In-Stock	NA
DCM27691	dcm_mfsm	ZINC4791497	For-sale	NA
DCM27955	dcm_500	ZINC26540880	For-sale	NA
DCM28032	dcm_500	ZINC109814137	In-Stock	NA
DCM28033	dcm_500	ZINC8917973	In-Stock	NA
DCM28034	dcm_500	ZINC8918417	In-Stock	NA
DCM28724	dcm_500	ZINC4435127	In-Stock	NA
DCM28770	dcm_500	ZINC100778693	In-Stock	group_1
DCM28813	dcm_mfsm	ZINC15936859	In-Stock	NA
DCM28859	dcm_mfsm	ZINC12443570	Annotated	NA
DCM28933	dcm_500	ZINC15935251	Annotated	NA
DCM29402	dcm_500	ZINC32957546	In-Stock	NA
DCM29531	dcm_500	ZINC66157621	Annotated	NA
DCM29532	dcm_500	ZINC169313527	Annotated	NA
DCM29534	dcm_500	ZINC64704924	Annotated	NA
DCM29547	dcm_500	ZINC95849037	Annotated	NA
DCM29556	dcm_500	ZINC95850213	Annotated	NA
DCM29571	dcm_500	ZINC95819392	Annotated	NA
DCM29666	dcm_500	ZINC72134244	Annotated	NA
DCM29774	dcm_500	ZINC61923488	Annotated	NA
DCM29793	dcm_500	ZINC95678890	Annotated	NA
DCM29815	dcm_500	ZINC95566815	Annotated	NA
DCM29840	dcm_500	ZINC61921703	Annotated	NA
DCM30263	dcm_500	ZINC72104263	Annotated	NA
DCM30268	dcm_500	ZINC72120516	Annotated	NA
DCM30269	dcm_500	ZINC95604532	Annotated	NA
DCM30333	dcm_500	ZINC72138213	Annotated	NA
DCM30682	dcm_500	ZINC1577795	In-Stock	group_1
DCM30732	dcm_500	ZINC714407	In-Stock	NA
DCM30886	dcm_mfsm	ZINC4388846	On-demand	NA
DCM32253	dcm_mfsm	ZINC1420913	In-Stock	NA
DCM32426	dcm_mfsm	ZINC2414685	In-Stock	NA
DCM32428	dcm_mfsm	ZINC2417617	In-Stock	NA
DCM32890	dcm_mfsm	ZINC3322834	On-demand	NA
DCM33486	dcm_500	ZINC1181094	In-Stock	group_1
DCM33835	dcm_500	ZINC448469	In-Stock	NA
DCM34120	dcm_500	ZINC12485946	In-Stock	NA
DCM34281	dcm_mfsm	ZINC3045468	In-Stock	NA
DCM3444	dcm_mfsm	ZINC100421591	In-Stock	NA
DCM34448	dcm_mfsm	ZINC3043428	In-Stock	NA
DCM34525	dcm_mfsm	ZINC10413653	On-demand	NA
DCM34526	dcm_mfsm	ZINC8579752	In-Stock	NA
DCM34747	dcm_mfsm	ZINC220861	In-Stock	NA
DCM34984	dcm_mfsm	ZINC5466975	On-demand	NA
DCM35395	dcm_mfsm	ZINC3043618	For-sale	NA
DCM3542	dcm_mfsm	ZINC13522263	In-Stock	NA
DCM35470	dcm_500	ZINC2168267	In-Stock	NA
DCM35660	dcm_500	ZINC7992661	Annotated	NA
DCM3584	dcm_mfsm	ZINC100235272	In-Stock	NA
DCM35942	dcm_500	ZINC13085121	In-Stock	NA
DCM35960	dcm_500	ZINC13565585	In-Stock	NA
DCM362	dcm_500	ZINC38140339	In-Stock	NA
DCM36268	dcm_500	ZINC32975799	On-demand	NA
DCM36446	dcm_mfsm	ZINC8232900	On-demand	NA
DCM36734	dcm_mfsm	ZINC47917540	In-Stock	NA
DCM37178	dcm_500	ZINC8345529	In-Stock	NA
DCM37228	dcm_500	ZINC8861194	For-sale	NA
DCM37241	dcm_500	ZINC43658683	For-sale	NA
DCM37293	dcm_500	ZINC8791150	In-Stock	NA
DCM37492	dcm_500	ZINC93488260	In-Stock	NA
DCM37950	dcm_500	ZINC23079914	In-Stock	NA
DCM38209	dcm_mfsm	ZINC12591770	In-Stock	NA
DCM38243	dcm_500	ZINC5703466	In-Stock	NA
DCM38500	dcm_500	ZINC72139542	Annotated	NA
DCM38746	dcm_500	ZINC108515978	Annotated	NA
DCM38753	dcm_500	ZINC95856837	Annotated	NA
DCM38761	dcm_500	ZINC72137761	Annotated	NA
DCM38766	dcm_500	ZINC72142395	Annotated	NA
DCM38769	dcm_500	ZINC95834002	Annotated	NA
DCM38771	dcm_500	ZINC95836221	Annotated	NA
DCM38881	dcm_500	ZINC72138156	Annotated	NA
DCM38891	dcm_500	ZINC66136286	Annotated	NA
DCM38897	dcm_500	ZINC66157286	Annotated	NA
DCM38971	dcm_500	ZINC61923477	Annotated	NA
DCM38972	dcm_500	ZINC61923459	Annotated	NA
DCM39023	dcm_500	ZINC72136672	Annotated	NA
DCM39026	dcm_500	ZINC95775882	Annotated	NA
DCM39027	dcm_500	ZINC95599231	Annotated	NA
DCM39038	dcm_500	ZINC61921688	Annotated	NA
DCM39429	dcm_500	ZINC95599410	Annotated	NA
DCM39443	dcm_500	ZINC199363719	Annotated	NA
DCM39517	dcm_500	ZINC95571208	Annotated	NA
DCM40112	dcm_500	ZINC4373525	Annotated	NA
DCM405	dcm_500	ZINC2578343	In-Stock	NA
DCM408	dcm_500	ZINC4409880	In-Stock	NA
DCM42000	dcm_mfsm	ZINC3313540	On-demand	NA
DCM42804	dcm_500	ZINC4196722	In-Stock	NA
DCM43415	dcm_500	ZINC4100979	In-Stock	NA
DCM43587	dcm_mfsm	ZINC2972218	For-sale	NA
DCM43592	dcm_500	ZINC2139931	In-Stock	NA
DCM44292	dcm_mfsm	ZINC6084997	On-demand	NA
DCM45225	dcm_mfsm	ZINC4973438	In-Stock	NA
DCM45266	dcm_500	ZINC38148342	In-Stock	NA
DCM45302	dcm_500	ZINC3882132	In-Stock	NA
DCM45501	dcm_500	ZINC5307403	In-Stock	NA
DCM46479	dcm_500	ZINC43649828	For-sale	NA
DCM46495	dcm_500	ZINC9874003	For-sale	NA
DCM46541	dcm_500	ZINC8790609	In-Stock	NA
DCM46702	dcm_500	ZINC15996876	In-Stock	NA
DCM47120	dcm_500	ZINC9351220	In-Stock	NA
DCM47255	dcm_500	ZINC4270598	For-sale	NA
DCM47320	dcm_mfsm	ZINC12717015	In-Stock	NA
DCM47520	dcm_mfsm	ZINC14953275	In-Stock	NA
DCM47990	dcm_500	ZINC169313527	Annotated	NA
DCM47995	dcm_500	ZINC169355503	Annotated	NA
DCM47997	dcm_500	ZINC95568679	Annotated	NA
DCM48023	dcm_500	ZINC95862668	Annotated	NA
DCM48025	dcm_500	ZINC95854330	Annotated	NA
DCM48026	dcm_500	ZINC95861553	Annotated	NA
DCM48028	dcm_500	ZINC95818998	Annotated	NA
DCM48059	dcm_500	ZINC72141690	Annotated	group_4
DCM48135	dcm_500	ZINC66129137	Annotated	NA
DCM48214	dcm_500	ZINC61923446	Annotated	NA
DCM48217	dcm_500	ZINC61923416	Annotated	NA
DCM48261	dcm_500	ZINC95822309	Annotated	NA
DCM48283	dcm_500	ZINC61921685	Annotated	NA
DCM48505	dcm_mfsm	ZINC61905498	Annotated	group_4
DCM4887	dcm_mfsm	ZINC2712807	For-sale	NA
DCM49085	dcm_500	ZINC59365324	In-Stock	NA
DCM49160	dcm_500	ZINC6552071	In-Stock	group_2
DCM49180	dcm_500	ZINC6551195	Annotated	NA
DCM49203	dcm_mfsm	ZINC4411486	Annotated	NA
DCM49591	dcm_mfsm	ZINC193982	In-Stock	NA
DCM50478	dcm_mfsm	ZINC4966901	In-Stock	NA
DCM50581	dcm_mfsm	ZINC1404049	In-Stock	NA
DCM50757	dcm_mfsm	ZINC2401805	In-Stock	NA
DCM50768	dcm_mfsm	ZINC6475364	In-Stock	NA
DCM51005	dcm_mfsm	ZINC2876815	In-Stock	NA
DCM5170	dcm_mfsm	ZINC3274460	On-demand	NA
DCM51876	dcm_500	ZINC168066395	In-Stock	NA
DCM52095	dcm_mfsm	ZINC4838229	In-Stock	NA
DCM5248	dcm_mfsm	ZINC8665956	On-demand	NA
DCM52537	dcm_500	ZINC248209	In-Stock	NA
DCM52570	dcm_mfsm	ZINC425041	Annotated	NA
DCM52676	dcm_mfsm	ZINC3048721	On-demand	NA
DCM52708	dcm_500	ZINC4029190	In-Stock	NA
DCM52789	dcm_mfsm	ZINC425399	For-sale	NA
DCM52839	dcm_500	ZINC9597050	For-sale	NA
DCM53155	dcm_500	ZINC3234856	For-sale	NA
DCM53228	dcm_500	ZINC2643201	In-Stock	NA
DCM53313	dcm_500	ZINC3252176	For-sale	NA
DCM53436	dcm_500	ZINC6559046	For-sale	NA
DCM55136	dcm_500	ZINC12713607	In-Stock	NA
DCM55420	dcm_500	ZINC8391138	In-Stock	NA
DCM55533	dcm_500	ZINC8917865	In-Stock	group_1
DCM55540	dcm_500	ZINC100775138	In-Stock	NA
DCM55541	dcm_500	ZINC252694857	In-Stock	NA
DCM56045	dcm_500	ZINC38150019	In-Stock	NA
DCM56458	dcm_mfsm	ZINC12439846	In-Stock	NA
DCM57012	dcm_500	ZINC66157621	Annotated	NA
DCM57013	dcm_500	ZINC169354412	Annotated	NA
DCM57014	dcm_500	ZINC66157621	Annotated	NA
DCM57017	dcm_500	ZINC95570847	Annotated	NA
DCM57018	dcm_500	ZINC72127714	Annotated	group_3
DCM57019	dcm_500	ZINC169355851	Annotated	NA
DCM57021	dcm_500	ZINC72139940	Annotated	NA
DCM57024	dcm_500	ZINC95819366	Annotated	NA
DCM57039	dcm_500	ZINC95853050	Annotated	NA
DCM57042	dcm_500	ZINC95567194	Annotated	NA
DCM57151	dcm_500	ZINC66129447	Annotated	NA
DCM57189	dcm_500	ZINC72135836	Annotated	NA
DCM57239	dcm_500	ZINC61923385	Annotated	NA
DCM57289	dcm_500	ZINC72136587	Annotated	NA
DCM58111	dcm_mfsm	ZINC18227624	In-Stock	NA
DCM59381	dcm_500	ZINC6595773	In-Stock	NA
DCM59693	dcm_mfsm	ZINC13930268	On-demand	NA
DCM59725	dcm_mfsm	ZINC2633969	In-Stock	NA
DCM61266	dcm_500	ZINC17413945	For-sale	NA
DCM61346	dcm_500	ZINC38145888	In-Stock	NA
DCM61537	dcm_500	ZINC4100746	In-Stock	NA
DCM62274	dcm_mfsm	ZINC18044806	On-demand	NA
DCM62881	dcm_500	ZINC22448696	In-Stock	NA
DCM62943	dcm_500	ZINC7992663	Annotated	NA
DCM63228	dcm_500	ZINC13084963	In-Stock	NA
DCM63536	dcm_500	ZINC5307403	In-Stock	NA
DCM64364	dcm_500	ZINC9958615	On-demand	NA
DCM6447	dcm_500	ZINC13503295	In-Stock	NA
DCM64526	dcm_500	ZINC9952377	On-demand	NA
DCM6485	dcm_500	ZINC12486170	In-Stock	NA
DCM6489	dcm_500	ZINC38145836	In-Stock	NA
DCM65035	dcm_mfsm	ZINC4791403	In-Stock	NA
DCM65267	dcm_500	ZINC100771995	In-Stock	group_1
DCM65270	dcm_500	ZINC100778159	In-Stock	group_1
DCM655	dcm_mfsm	ZINC13637692	On-demand	NA
DCM6579	dcm_500	ZINC8670522	In-Stock	NA
DCM65954	dcm_500	ZINC36382915	Annotated	NA
DCM65985	dcm_500	ZINC253977802	Annotated	NA
DCM66013	dcm_500	ZINC169355503	Annotated	NA
DCM66033	dcm_500	ZINC95860778	Annotated	NA
DCM66045	dcm_500	ZINC95838408	Annotated	NA
DCM6605	dcm_500	ZINC4111356	In-Stock	NA
DCM66080	dcm_500	ZINC95847054	Annotated	NA
DCM66085	dcm_500	ZINC95819033	Annotated	NA
DCM66086	dcm_500	ZINC95776069	Annotated	group_4
DCM66087	dcm_500	ZINC95835171	Annotated	NA
DCM66223	dcm_500	ZINC61923453	Annotated	NA
DCM66277	dcm_500	ZINC95568862	Annotated	NA
DCM66278	dcm_500	ZINC95824260	Annotated	NA
DCM66284	dcm_500	ZINC72103201	Annotated	NA
DCM66686	dcm_500	ZINC95568053	Annotated	NA
DCM66689	dcm_500	ZINC72139524	Annotated	NA
DCM68029	dcm_500	ZINC15996193	In-Stock	NA
DCM6816	dcm_500	ZINC2940092	In-Stock	NA
DCM68497	dcm_mfsm	ZINC4981564	Annotated	NA
DCM68875	dcm_mfsm	ZINC9691949	In-Stock	NA
DCM69299	dcm_500	ZINC3326549	For-sale	NA
DCM69912	dcm_500	ZINC318186	In-Stock	NA
DCM70226	dcm_500	ZINC264208	In-Stock	NA
DCM70536	dcm_500	ZINC13150704	In-Stock	NA
DCM70561	dcm_500	ZINC8666784	In-Stock	NA
DCM70655	dcm_mfsm	ZINC3017965	On-demand	NA
DCM70935	dcm_mfsm	ZINC428528	On-demand	NA
DCM71454	dcm_mfsm	ZINC3430026	On-demand	NA
DCM71501	dcm_mfsm	ZINC6507337	On-demand	NA
DCM71689	dcm_500	ZINC3421872	For-sale	NA
DCM71724	dcm_mfsm	ZINC18056800	In-Stock	group_1
DCM72086	dcm_500	ZINC825018	In-Stock	NA
DCM72282	dcm_mfsm	ZINC4965455	On-demand	NA
DCM72464	dcm_500	ZINC3614797	On-demand	NA
DCM73029	dcm_500	ZINC3798757	In-Stock	NA
DCM73077	dcm_500	ZINC38957720	In-Stock	NA
DCM73597	dcm_500	ZINC38140335	In-Stock	NA
DCM73598	dcm_500	ZINC8918473	In-Stock	group_1
DCM73601	dcm_500	ZINC9318948	In-Stock	NA
DCM73602	dcm_500	ZINC100773203	In-Stock	NA
DCM73603	dcm_500	ZINC252693079	In-Stock	NA
DCM73651	dcm_500	ZINC59784789	Annotated	NA
DCM7382	dcm_500	ZINC355196	In-Stock	NA
DCM74127	dcm_mfsm	ZINC6893692	For-sale	NA
DCM74673	dcm_500	ZINC12934593	In-Stock	NA
DCM75073	dcm_500	ZINC169355050	Annotated	NA
DCM75077	dcm_500	ZINC169356224	Annotated	NA
DCM75078	dcm_500	ZINC95570847	Annotated	NA
DCM75080	dcm_500	ZINC169355303	Annotated	NA
DCM75087	dcm_500	ZINC61948536	Annotated	NA
DCM751	dcm_500	ZINC12858212	In-Stock	NA
DCM75105	dcm_500	ZINC72137761	Annotated	NA
DCM75109	dcm_500	ZINC95818691	Annotated	NA
DCM75112	dcm_500	ZINC95860695	Annotated	NA
DCM75113	dcm_500	ZINC95859896	Annotated	NA
DCM75118	dcm_500	ZINC95855618	Annotated	NA
DCM75119	dcm_500	ZINC95569530	Annotated	NA
DCM75124	dcm_500	ZINC95860315	Annotated	NA
DCM752	dcm_500	ZINC38139991	In-Stock	NA
DCM75244	dcm_500	ZINC66139206	Annotated	NA
DCM75304	dcm_500	ZINC61923654	Annotated	NA
DCM75329	dcm_500	ZINC169331643	Annotated	NA
DCM75354	dcm_500	ZINC95569002	Annotated	NA
DCM75355	dcm_500	ZINC95570317	Annotated	NA
DCM75362	dcm_500	ZINC61922025	Annotated	NA
DCM75377	dcm_500	ZINC61921675	Annotated	NA
DCM75385	dcm_500	ZINC61921506	Annotated	NA
DCM754	dcm_500	ZINC13777638	In-Stock	NA
DCM75501	dcm_mfsm	ZINC61925724	Annotated	NA
DCM75726	dcm_500	ZINC72135696	Annotated	NA
DCM75729	dcm_500	ZINC956019980	Annotated	NA
DCM7637	dcm_500	ZINC34859898	On-demand	NA
DCM76522	dcm_mfsm	ZINC9331732	In-Stock	NA
DCM7692	dcm_500	ZINC3448420	For-sale	NA
DCM77611	dcm_mfsm	ZINC4910119	In-Stock	NA
DCM77937	dcm_mfsm	ZINC12814324	In-Stock	NA
DCM78359	dcm_mfsm	ZINC15879565	On-demand	NA
DCM78683	dcm_mfsm	ZINC3611852	On-demand	group_4
DCM78789	dcm_500	ZINC29111	In-Stock	NA
DCM79046	dcm_500	ZINC2751915	In-Stock	NA
DCM79611	dcm_500	ZINC13508173	In-Stock	NA
DCM79733	dcm_500	ZINC13565537	In-Stock	NA
DCM7989	dcm_500	ZINC5148710	Annotated	NA
DCM79916	dcm_500	ZINC8829596	Annotated	NA
DCM79946	dcm_mfsm	ZINC3630196	For-sale	NA
DCM80103	dcm_mfsm	ZINC3630218	Annotated	NA
DCM80222	dcm_500	ZINC62974	In-Stock	NA
DCM80608	dcm_mfsm	ZINC5937219	On-demand	NA
DCM80677	dcm_500	ZINC3413941	On-demand	NA
DCM80931	dcm_500	ZINC12524989	For-sale	NA
DCM80989	dcm_500	ZINC3247248	For-sale	NA
DCM81663	dcm_500	ZINC21682670	In-Stock	NA
DCM81668	dcm_500	ZINC4026406	In-Stock	NA
DCM82216	dcm_500	ZINC4270581	In-Stock	group_1
DCM82233	dcm_500	ZINC4935068	For-sale	NA
DCM82649	dcm_500	ZINC7987554	On-demand	NA
DCM82724	dcm_500	ZINC22024896	In-Stock	NA
DCM82828	dcm_500	ZINC8789493	In-Stock	NA
DCM82831	dcm_500	ZINC9109751	In-Stock	group_1
DCM82875	dcm_500	ZINC245325674	In-Stock	NA
DCM83012	dcm_mfsm	ZINC4829332	On-demand	NA
DCM83025	dcm_500	ZINC13555597	In-Stock	NA
DCM83035	dcm_500	ZINC13593079	In-Stock	NA
DCM83041	dcm_mfsm	ZINC13608848	In-Stock	NA
DCM83133	dcm_500	ZINC4270624	For-sale	NA
DCM83733	dcm_mfsm	ZINC55166873	In-Stock	NA
DCM83783	dcm_mfsm	ZINC11819198	In-Stock	NA
DCM83824	dcm_mfsm	ZINC12429828	Annotated	NA
DCM84132	dcm_mfsm	ZINC32963843	In-Stock	NA
DCM8416	dcm_500	ZINC13085134	In-Stock	NA
DCM84279	dcm_500	ZINC38143035	Annotated	NA
DCM84364	dcm_500	ZINC61947759	Annotated	NA
DCM84453	dcm_500	ZINC104212338	Annotated	NA
DCM84481	dcm_500	ZINC66148052	Annotated	NA
DCM84518	dcm_500	ZINC72123756	Annotated	NA
DCM84568	dcm_500	ZINC95567047	Annotated	NA
DCM8457	dcm_mfsm	ZINC4973465	In-Stock	NA
DCM84571	dcm_500	ZINC61923414	Annotated	NA
DCM84583	dcm_500	ZINC95569981	Annotated	NA
DCM84619	dcm_500	ZINC95772184	Annotated	NA
DCM84668	dcm_500	ZINC61920985	Annotated	NA
DCM85076	dcm_500	ZINC95604634	Annotated	group_3
DCM85663	dcm_500	ZINC1346324	Annotated	NA
DCM85870	dcm_mfsm	ZINC67405	In-Stock	NA
DCM86802	dcm_500	ZINC1272575	In-Stock	NA
DCM86941	dcm_mfsm	ZINC5800425	In-Stock	NA
DCM87112	dcm_500	ZINC2345372	In-Stock	NA
DCM87524	dcm_500	ZINC3266402	For-sale	NA
DCM88797	dcm_500	ZINC13507193	In-Stock	NA
DCM88879	dcm_500	ZINC4965424	Annotated	NA
DCM88894	dcm_500	ZINC8680717	In-Stock	NA
DCM88974	dcm_mfsm	ZINC4004773	In-Stock	NA
DCM88992	dcm_mfsm	ZINC95544758	Annotated	NA
DCM89082	dcm_mfsm	ZINC2971722	For-sale	NA
DCM89752	dcm_mfsm	ZINC8378931	On-demand	NA
DCM89771	dcm_mfsm	ZINC3043551	For-sale	NA
DCM90133	dcm_mfsm	ZINC3630360	In-Stock	NA
DCM90213	dcm_mfsm	ZINC3314278	On-demand	group_4
DCM90563	dcm_mfsm	ZINC4487942	In-Stock	NA
DCM90724	dcm_500	ZINC5055285	Annotated	NA
DCM91006	dcm_mfsm	ZINC6719705	In-Stock	group_2
DCM91011	dcm_mfsm	ZINC6754750	In-Stock	group_1
DCM91426	dcm_mfsm	ZINC4791765	In-Stock	NA
DCM91504	dcm_500	ZINC3895674	In-Stock	NA
DCM91661	dcm_mfsm	ZINC2712780	In-Stock	NA
DCM91792	dcm_mfsm	ZINC7989474	For-sale	NA
DCM91852	dcm_mfsm	ZINC4469670	On-demand	NA
DCM91973	dcm_500	ZINC8918514	Annotated	NA
DCM91976	dcm_500	ZINC38139993	In-Stock	NA
DCM92035	dcm_500	ZINC101277955	In-Stock	NA
DCM92079	dcm_mfsm	ZINC9134786	In-Stock	NA
DCM92409	dcm_mfsm	ZINC6732983	In-Stock	NA
DCM92877	dcm_500	ZINC15935010	Annotated	NA
DCM93255	dcm_500	ZINC32980237	In-Stock	group_1
DCM93444	dcm_500	ZINC61948536	Annotated	NA
DCM93451	dcm_500	ZINC108515978	Annotated	group_3
DCM93457	dcm_500	ZINC169293370	Annotated	NA
DCM93464	dcm_500	ZINC95834575	Annotated	NA
DCM93468	dcm_500	ZINC95852740	Annotated	NA
DCM93470	dcm_500	ZINC95754989	Annotated	NA
DCM93475	dcm_500	ZINC95859673	Annotated	NA
DCM93476	dcm_500	ZINC95569040	Annotated	NA
DCM93507	dcm_500	ZINC95782268	Annotated	NA
DCM93508	dcm_500	ZINC95771203	Annotated	NA
DCM93560	dcm_500	ZINC66156604	Annotated	NA
DCM93563	dcm_500	ZINC66167345	Annotated	NA
DCM93574	dcm_500	ZINC66139468	Annotated	NA
DCM93597	dcm_500	ZINC13006043	In-Stock	NA
DCM93630	dcm_500	ZINC61923589	Annotated	NA
DCM93636	dcm_500	ZINC61923473	Annotated	NA
DCM93637	dcm_500	ZINC61923454	Annotated	NA
DCM93667	dcm_500	ZINC95700773	Annotated	NA
DCM93678	dcm_500	ZINC95775213	Annotated	NA
DCM93682	dcm_500	ZINC95752215	Annotated	group_4
DCM93699	dcm_500	ZINC61921651	Annotated	NA
DCM93909	dcm_mfsm	ZINC61905955	Annotated	NA
DCM94086	dcm_500	ZINC95571216	Annotated	NA
DCM94188	dcm_mfsm	ZINC18143600	In-Stock	group_1
DCM9431	dcm_500	ZINC22460312	In-Stock	NA
DCM94549	dcm_500	ZINC49337	In-Stock	NA
DCM947	dcm_500	ZINC8918036	In-Stock	NA
DCM94858	dcm_500	ZINC4301905	In-Stock	NA
DCM9534	dcm_500	ZINC7781484	For-sale	group_3
DCM95420	dcm_mfsm	ZINC101016840	In-Stock	NA
DCM9561	dcm_500	ZINC7985184	For-sale	NA
DCM95987	dcm_mfsm	ZINC1430635	In-Stock	NA
DCM97265	dcm_500	ZINC316458	In-Stock	NA
DCM97267	dcm_500	ZINC9688	In-Stock	NA
DCM9740	dcm_500	ZINC12876769	In-Stock	NA
DCM9744	dcm_500	ZINC12884974	In-Stock	NA
DCM98164	dcm_mfsm	ZINC5524445	In-Stock	NA
DCM98237	dcm_mfsm	ZINC2972217	For-sale	NA
DCM98443	dcm_mfsm	ZINC15879777	On-demand	NA
DCM9847	dcm_mfsm	ZINC195393397	Annotated	NA
DCM98629	dcm_mfsm	ZINC20645473	For-sale	NA
DCM98937	dcm_mfsm	ZINC16050657	On-demand	NA
DCM98946	dcm_mfsm	ZINC3456648	On-demand	NA
ZINC000373659060	top-ranked_ZINC	ZINC000373659060	For-Sale	NA
ZINC000452259570	top-ranked_ZINC	ZINC000452259570	On-Demand	NA
ZINC000541677852	top-ranked_ZINC	ZINC000541677852	On-Demand	NA
ZINC000543523838	top-ranked_ZINC	ZINC000543523838	On-Demand	NA
ZINC000544491494	top-ranked_ZINC	ZINC000544491494	On-Demand	NA
ZINC000636416501	top-ranked_ZINC	ZINC000636416501	On-Demand	NA
ZINC001062595734	top-ranked_ZINC	ZINC001062595734	On-Demand	NA
ZINC001186058814	top-ranked_ZINC	ZINC001186058814	On-Demand	group_3
ZINC001218583693	top-ranked_ZINC	ZINC001218583693	On-Demand	group_3
ZINC001655436520	top-ranked_ZINC	ZINC001655436520	On-Demand	group_3

## Sheet: hits_ADMETox
Molecule	Canonical SMILES	Formula	MW	#Heavy atoms	#Aromatic heavy atoms	Fraction Csp3	#Rotatable bonds	#H-bond acceptors	#H-bond donors	MR	TPSA	iLOGP	XLOGP3	WLOGP	MLOGP	Silicos-IT Log P	Consensus Log P	ESOL Log S	ESOL Solubility (mg/ml)	ESOL Solubility (mol/l)	ESOL Class	Ali Log S	Ali Solubility (mg/ml)	Ali Solubility (mol/l)	Ali Class	Silicos-IT LogSw	Silicos-IT Solubility (mg/ml)	Silicos-IT Solubility (mol/l)	Silicos-IT class	GI absorption	BBB permeant	Pgp substrate	CYP1A2 inhibitor	CYP2C19 inhibitor	CYP2C9 inhibitor	CYP2D6 inhibitor	CYP3A4 inhibitor	log Kp (cm/s)	Lipinski #violations	Ghose #violations	Veber #violations	Egan #violations	Muegge #violations	Bioavailability Score	PAINS #alerts	Brenk #alerts	Leadlikeness #violations	Synthetic Accessibility
DBB10063	CSCC[C@H]1NC(=O)[C@@H](NC(=O)[C@H](NC(=O)[C@H](Cc2ccccc2)NC(=O)[C@H](N/C(=C/2\N([C@@H](/C(=N/C(=O)[C@H](NC1=O)CC(C)C)/CCS(=C)O)O)CCC2)/O)Cc1ccccc1)Cc1c[nH]c2c1cccc2)C(C)C	C55H73N9O9S2	1068.35	75	21	0.45	15	10	10	328.1	311.19	0	8.17	1.67	0.23	5.61	3.14	-10.83	1.59e-08	1.49e-11	Insoluble	-14.56	2.91e-12	2.73e-15	Insoluble	-14.08	8.93e-12	8.36e-15	Insoluble	Low	No	Yes	No	No	No	No	No	-7.02	3	3	2	1	4	0.17	0	1	3	9.95
DBB10073	OS(=C)CC[C@H]1NC(=O)[C@@H](NC(=O)[C@@H](NC(=O)[C@H](Cc2ccccc2)NC(=O)[C@@H](NC(=O)[C@@H]2N([C@@H](/C(=N/C(=O)[C@@H](NC1=O)CC(C)C)/CCS(=C)O)O)CCC2)Cc1ccccc1)Cc1c[nH]c2c1cccc2)C(C)C	C55H73N9O10S2	1084.35	76	21	0.45	15	12	10	331.09	322.17	0	8.24	0.65	-0.55	5.31	2.73	-10.97	1.17e-08	1.07e-11	Insoluble	-14.87	1.47e-12	1.36e-15	Insoluble	-13.75	1.92e-11	1.77e-14	Insoluble	Low	No	Yes	No	No	No	No	No	-7.06	3	3	2	1	5	0.17	0	1	3	9.96
DBB10128	OC/C(=C(\N/C(=C(\N/C=C(/N[C@H](C(=O)/N=C(/[C@H](N1CCC[C@H]1C(=O)NCC(=O)N)O)\CCCN=C(N)N)CC(C)C)\O)/O)/Cc1ccc(cc1)O)/O)/N/C(=C(\Cc1c[nH]c2c1cccc2)/N/C(=C(\N/C(=C(/CCC(=O)O)\N)/O)/Cc1nc[nH]c1)/O)/O	C55H77N17O14	1200.31	86	20	0.36	36	18	23	318.06	531.3	1.59	-1.49	0.41	-5.52	-1.37	-1.28	-4.14	0.0871	7.26e-05	Moderately soluble	-9.16	8.26e-07	6.88e-10	Poorly soluble	-5.12	0.00908	7.57e-06	Moderately soluble	Low	No	Yes	No	No	No	No	No	-14.68	3	3	2	1	5	0.17	0	3	2	9.62
DBB10149	CC[C@H]([C@@H]1NC(=O)[C@@H](N/C(=C(/Cc2ccccc2)\N/C(=C(/Cc2ccccc2)\N/C(=C/2\N([C@@H](/C(=N/C(=O)[C@H](NC(=O)[C@H](NC1=O)CCS(=C)O)CC(C)C)/CCS(=C)O)O)CCC2)/O)/O)/O)Cc1c[nH]c2c1cccc2)C	C56H75N9O10S2	1098.38	77	21	0.41	16	11	13	338.59	331.65	0	10.48	3.54	-0.4	5.11	3.75	-12.4	4.39e-10	4e-13	Insoluble	-17.39	4.46e-15	4.06e-18	Insoluble	-13.34	4.99e-11	4.54e-14	Insoluble	Low	No	Yes	No	No	No	No	No	-5.56	3	3	2	1	6	0.17	0	1	3	10
DBB10150	CSCC/C/1=N\C(=O)[C@H](CC(C)C)NC(=O)[C@H](CCS(=C)O)NC(=O)[C@H](NC(=O)[C@@H](N/C(=C(\N/C(=C(\N/C(=C\2/N([C@H]1O)CCC2)/O)/Cc1ccccc1)/O)/Cc1ccccc1)/O)Cc1c[nH]c2c1cccc2)[C@H](CC)C	C56H75N9O9S2	1082.38	76	21	0.43	16	10	12	334.7	317.51	0	9.67	3.73	0.38	5.63	3.88	-11.79	1.75e-09	1.62e-12	Insoluble	-16.25	6.04e-14	5.58e-17	Insoluble	-13.93	1.27e-11	1.17e-14	Insoluble	Low	No	Yes	No	No	No	No	No	-6.04	3	3	2	1	5	0.17	0	1	3	10
DBB10167	CC(C[C@H](C(=O)N)N/C(=C(/N/C(=C\1/CCCN1[C@@H](/C(=N/C(=C(/N/C(=C(\N/C(=C(/NC(=O)/C(=N\C(=C\1/CCCN1[C@@H](C(=N)C)O)\O)/C[C@H](O)N)\Cc1ccccc1)/O)/CC(C)C)/O)\C)/O)/Cc1ccc(cc1)O)O)/O)\CCCN=C(N)N)/O)C	C56H85N15O12	1160.37	83	12	0.46	32	17	20	323.97	468.08	4.26	2.78	2.69	-3.01	0.66	1.48	-6.78	0.000192	1.66e-07	Poorly soluble	-12.27	6.29e-10	5.42e-13	Insoluble	-4.18	0.0768	6.62e-05	Moderately soluble	Low	No	Yes	No	No	No	No	No	-11.4	3	3	2	1	5	0.17	0	4	2	10
DBB10185	CC[C@H](/C(=C(/N/C(=C(\N/C(=C(/N/C(=C(\N=C(\[C@H](N1CCC/C/1=C(\N[C@H](C(=O)N[C@@H](C(=O)N[C@H](C(=O)O)CC(C)C)Cc1ccccc1)Cc1ccc(cc1)O)/O)O)/Cc1c[nH]cn1)/O)/CCCN=C(N)N)\O)/CCCN=C(N)N)/O)/C)\O)/N)C	C56H85N17O11	1172.38	84	17	0.45	36	15	20	321.75	484.33	3.87	3.03	2.21	-2.98	1.07	1.44	-6.79	0.00019	1.62e-07	Poorly soluble	-12.87	1.59e-10	1.36e-13	Insoluble	-6.56	0.000322	2.75e-07	Poorly soluble	Low	No	Yes	No	No	No	No	No	-11.3	3	3	2	1	5	0.17	0	3	2	10
DBB10210	CC[C@@H]([C@H]1NC(=O)[C@@H](N/C(=C(/Cc2ccccc2)\N/C(=C(/Cc2ccccc2)\N/C(=C\2/N([C@H](/C(=N/C(=O)[C@H](NC(=O)[C@@H](NC1=O)CCS(=C)O)CC(C)C)/CC(C)C)O)CCC2)/O)/O)/O)Cc1c[nH]c2c1cccc2)C	C57H77N9O9S	1064.34	76	21	0.44	15	10	12	331.92	292.21	0	10.35	4.02	0.53	5.77	4.13	-12.17	7.13e-10	6.7e-13	Insoluble	-16.43	3.97e-14	3.73e-17	Insoluble	-13.88	1.39e-11	1.31e-14	Insoluble	Low	No	Yes	No	No	No	No	No	-5.44	3	3	2	1	4	0.17	0	1	3	10
DBB10732	NCCCC/C/1=C(/O)\N/C(=C(\O)/N/C(=C(/O)\N[C@@H]([C@H](O)C)C(=O)N[C@H](CO)C(=O)N[C@@H](CCSSC/C(=C(/N/C(=C(\N=C(\C(=O)N/C(=C(\N/C(=C(\N/C(=C(/N1)\O)/Cc1c[nH]c2c1cccc2)/O)/Cc1ccccc1)/O)/Cc1ccccc1)/C[C@H](O)N)/O)/CCCCN)\O)/N)C(=O)O)/Cc1ccccc1)/[C@@H](O)C	C72H98N16O17S2	1523.78	107	27	0.35	22	21	28	446.92	634.4	5.45	2.04	-0.4	-5.83	-0.84	0.08	-9.31	7.51e-07	4.93e-10	Poorly soluble	-14.99	1.56e-12	1.02e-15	Insoluble	-13.23	8.87e-11	5.82e-14	Insoluble	Low	No	Yes	No	No	No	No	No	-14.15	3	4	2	1	5	0.17	0	2	2	10
DBB11539	CCO[C@H](/C(=N\C(=O)c1cc(Cl)c2c(c1O)C(=O)O[C@@H](C2)C)/Cc1ccccc1)O	C22H22ClNO6	431.87	30	12	0.32	7	7	2	112.25	105.42	2.83	4.91	3.33	2.82	4.65	3.71	-5.44	0.00155	3.59e-06	Moderately soluble	-6.86	5.96e-05	1.38e-07	Poorly soluble	-5.92	0.000523	1.21e-06	Moderately soluble	High	No	No	No	Yes	Yes	No	Yes	-5.45	0	0	0	0	0	0.55	0	2	2	4.52
DBB11743	NCCCC/C(=N\[C@@H](C(=O)O)CCc1ccccc1)/[C@H](N1CCC[C@H]1C(=O)O)O	C21H31N3O5	405.49	29	6	0.57	12	8	4	114.5	136.45	2.74	-3.05	1.13	0.76	2.13	0.74	0.21	652	1.61	Highly soluble	0.75	2270	5.6	Highly soluble	-2.96	0.443	0.00109	Soluble	High	No	Yes	No	No	No	No	No	-10.94	0	0	1	1	1	0.55	0	1	2	4.58
DBB11880	Clc1cccc(c1)[C@H](/C(=N/C(C)(C)C)/C)O	C13H18ClNO	239.74	16	6	0.46	3	2	1	70.14	32.59	3.02	2.69	3.31	2.85	3.83	3.14	-3.1	0.19	0.000793	Soluble	-3.03	0.225	0.00094	Soluble	-4.18	0.0157	6.55e-05	Moderately soluble	High	Yes	No	Yes	No	No	Yes	No	-5.85	0	0	0	0	0	0.55	0	1	1	2.68
DBB11882	OCC(/N=C(/[C@H](c1cccc(c1)Cl)O)\C)(C)C	C13H18ClNO2	255.74	17	6	0.46	4	3	2	71.31	52.82	2.58	1.64	2.28	1.97	3.24	2.34	-2.46	0.895	0.0035	Soluble	-2.36	1.11	0.00434	Soluble	-3.62	0.0608	0.000238	Soluble	High	Yes	No	Yes	No	No	No	No	-6.7	0	0	0	0	0	0.55	0	1	0	2.91
DBB11884	OC(=O)CNC(=O)c1cccc(c1)Cl	C9H8ClNO3	213.62	14	6	0.11	4	3	2	51.03	66.4	1.47	0.94	1.15	1.41	1.31	1.26	-1.81	3.31	0.0155	Very soluble	-1.92	2.56	0.012	Very soluble	-2.8	0.339	0.00159	Soluble	High	Yes	No	No	No	No	No	No	-6.94	0	0	0	0	0	0.56	0	0	1	1.3
DBB11895	OC(=O)[C@@H](Cc1ccc(c(c1)Cl)O)N	C9H10ClNO3	215.63	14	6	0.22	3	4	3	52.53	83.55	1.24	-1.76	1	-1.12	1.05	0.08	-0.19	140	0.65	Very soluble	0.52	715	3.32	Highly soluble	-1.91	2.63	0.0122	Soluble	High	No	No	No	No	No	No	No	-8.86	0	0	0	0	0	0.55	0	0	1	1.85
DBB11972	Fc1ccc2c(c1)cc([nH]2)C(=O)O	C9H6FNO2	179.15	13	9	0	1	3	2	45.22	53.09	1.22	2.41	2.43	1.5	2.29	1.97	-2.92	0.218	0.00122	Soluble	-3.17	0.122	0.000681	Soluble	-2.94	0.208	0.00116	Soluble	High	Yes	No	No	No	No	No	No	-5.68	0	1	0	0	1	0.56	0	0	1	1.43
DBB12105	O=C(C(C)C)OCCCc1ccccc1	C13H18O2	206.28	15	6	0.46	6	2	0	61.54	26.3	3	3.57	2.82	3.13	3.34	3.17	-3.27	0.111	0.000539	Soluble	-3.81	0.0321	0.000156	Soluble	-4.13	0.0153	7.43e-05	Moderately soluble	High	Yes	No	No	No	No	Yes	No	-5.02	0	0	0	0	0	0.55	0	0	2	1.49
DBB12224	COc1cc2OC[C@]3([C@H](c2cc1CC=C(C)C)Oc1c3ccc(c1)O)O	C21H22O5	354.4	26	12	0.33	3	5	2	97.93	68.15	3.56	4.34	3.19	2.12	3.94	3.43	-4.91	0.00431	1.22e-05	Moderately soluble	-5.49	0.00116	3.27e-06	Moderately soluble	-5.18	0.00234	6.59e-06	Moderately soluble	High	Yes	No	No	Yes	Yes	Yes	Yes	-5.38	0	0	0	0	0	0.55	0	1	2	4.24
DBB12241	COc1ccc2c(c1CC=C(C)C)O[C@H]1[C@]2(O)COc2c1ccc(c2)O	C21H22O5	354.4	26	12	0.33	3	5	2	97.93	68.15	3.18	4.34	3.19	2.12	3.94	3.35	-4.91	0.00431	1.22e-05	Moderately soluble	-5.49	0.00116	3.27e-06	Moderately soluble	-5.18	0.00234	6.59e-06	Moderately soluble	High	Yes	No	No	Yes	Yes	Yes	Yes	-5.38	0	0	0	0	0	0.55	0	1	2	4.22
DBB12292	COc1c(OC)cc2c3c1c1cc(OC)c(cc1C[C@H]3[N+](CC2)(C)C)O	C21H26NO4	356.44	26	12	0.43	3	4	1	106.34	47.92	-0.19	3.06	2.61	-1.48	3.55	1.51	-4.12	0.027	7.56e-05	Moderately soluble	-3.73	0.0659	0.000185	Soluble	-6.38	0.000149	4.17e-07	Poorly soluble	High	Yes	Yes	Yes	No	No	Yes	Yes	-6.3	0	0	0	0	0	0.55	0	1	1	3.84
DBB12343	COc1ccc(cc1OC)CCNC(=O)/C=C/c1ccc(c(c1)OC)OC	C21H25NO5	371.43	27	12	0.29	10	5	1	104.41	66.02	3.69	2.72	2.98	2.03	4.19	3.12	-3.53	0.111	0.000298	Soluble	-3.76	0.0645	0.000174	Soluble	-6.27	0.000199	5.37e-07	Poorly soluble	High	Yes	No	No	Yes	Yes	Yes	Yes	-6.63	0	0	0	0	0	0.55	0	1	2	3
DBB12401	COc1cccc(c1O)c1nc2ccccc2c(n1)N1CCCC[C@H]1C	C21H23N3O2	349.43	26	16	0.33	3	4	1	107.74	58.48	3.65	4.55	4.01	2.68	3.6	3.7	-5.13	0.00259	7.41e-06	Moderately soluble	-5.5	0.0011	3.16e-06	Moderately soluble	-6.24	0.000201	5.75e-07	Poorly soluble	High	Yes	Yes	Yes	Yes	Yes	Yes	Yes	-5.2	0	0	0	0	0	0.55	0	0	1	3.16
DBB12536	COc1cc(CCc2ccccc2)c(c(c1CC=C(C)C)O)C(=O)O	C21H24O4	340.41	25	12	0.29	7	4	2	99.9	66.76	2.95	5.76	4.39	3.81	4.96	4.37	-5.47	0.00115	3.37e-06	Moderately soluble	-6.93	4e-05	1.17e-07	Poorly soluble	-5.89	0.000443	1.3e-06	Moderately soluble	High	Yes	No	Yes	Yes	Yes	No	No	-4.29	0	0	0	0	1	0.56	0	1	1	3.07
DBB12590	CO[C@H](CC(=O)CCc1ccccc1)CCc1ccc(c(c1)OC)O	C21H26O4	342.43	25	12	0.38	10	4	1	99.34	55.76	3.44	3.62	3.94	2.81	5	3.76	-3.94	0.0394	0.000115	Soluble	-4.48	0.0114	3.32e-05	Moderately soluble	-6.58	8.99e-05	2.62e-07	Poorly soluble	High	Yes	No	Yes	No	No	Yes	Yes	-5.82	0	0	0	0	0	0.55	0	0	2	3.09
DBB12644	COc1ccc2c(c1O)c1c(O)c(OC)cc3c1[C@@H](C2)[N+](C)(C)CC3	C20H24NO4	342.41	25	12	0.4	2	4	2	101.87	58.92	-0.59	2.74	2.31	-1.71	3.01	1.15	-3.91	0.0419	0.000122	Soluble	-3.63	0.0799	0.000233	Soluble	-5.69	0.000704	2.06e-06	Moderately soluble	High	Yes	Yes	Yes	No	No	No	Yes	-6.44	0	0	0	0	0	0.55	0	1	0	3.78
DBB12675	OC(=O)/C=C/[C@@H](C(O)O)NC(=C1C=CC(=NC[C@@H]2CNc3c(N2C)c(O)nc(n3)N)C=C1)O	C20H25N7O6	459.46	33	6	0.3	7	9	8	126.36	209.68	1.45	-0.66	-1.7	-1.22	-2.05	-0.84	-1.95	5.21	0.0113	Very soluble	-3.27	0.247	0.000538	Soluble	0.23	784	1.71	Soluble	Low	No	No	No	No	No	No	No	-9.57	2	1	1	1	2	0.11	0	4	1	5.19
DBB12677	O=CN1[C@@H](CN=C2C=CC(=C(N[C@@H](C(O)O)/C=C/C(=O)O)O)C=C2)CNc2c1c(O)nc(n2)N	C20H23N7O7	473.44	34	6	0.25	8	10	8	126.95	226.75	0.87	-1.41	-2.18	-1.63	-2.33	-1.34	-1.49	15.3	0.0324	Very soluble	-2.85	0.669	0.00141	Soluble	0.69	2300	4.85	Soluble	Low	No	No	No	No	No	No	No	-10.19	2	1	1	1	2	0.11	0	5	2	5.12
DBB12845	OC(=O)/C=C/[C@H](C(O)O)NC(=C1C=CC(=NC[C@H]2C=NC3=NC(=N)NC(=O)[C@H]3N2C)C=C1)O	C20H23N7O6	457.44	33	0	0.3	7	11	7	133.51	203.29	0.55	-4	-3.07	-1.15	-0.7	-1.67	0.31	925	2.02	Highly soluble	0.33	979	2.14	Highly soluble	0.42	1210	2.64	Soluble	Low	No	No	No	No	No	No	No	-11.93	2	2	1	1	4	0.17	0	4	1	5.79
DBB12848	O=CN(c1ccc(cc1)C(=O)N[C@@H](C(O)O)/C=C/C(=O)O)C[C@@H]1CNC2=NC(=NC(=O)C2=N1)N	C20H21N7O7	471.42	34	6	0.25	10	10	6	132.35	219.37	0.27	-2.55	-4.16	-1.43	-0.21	-1.61	-0.63	111	0.236	Very soluble	-1.51	14.5	0.0308	Very soluble	-1.46	16.2	0.0344	Soluble	Low	No	No	No	No	No	No	No	-10.99	2	2	1	1	3	0.17	0	3	2	4.91
DBB12974	O=CN1[C@@H](CN=C2C=CC(=C(N[C@@H](C(O)O)/C=C/C(=O)O)O)C=C2)CNc2c1c(O)nc(n2)N	C20H23N7O7	473.44	34	6	0.25	8	10	8	126.95	226.75	0.87	-1.41	-2.18	-1.63	-2.33	-1.34	-1.49	15.3	0.0324	Very soluble	-2.85	0.669	0.00141	Soluble	0.69	2300	4.85	Soluble	Low	No	No	No	No	No	No	No	-10.19	2	1	1	1	2	0.11	0	5	2	5.12
DBB12985	O=CN1[C@H](CN=C2C=CC(=C(N[C@H](C(O)O)/C=C/C(=O)O)O)C=C2)CNc2c1c(O)nc(n2)N	C20H23N7O7	473.44	34	6	0.25	8	10	8	126.95	226.75	1.06	-1.41	-2.18	-1.63	-2.33	-1.3	-1.49	15.3	0.0324	Very soluble	-2.85	0.669	0.00141	Soluble	0.69	2300	4.85	Soluble	Low	No	No	No	No	No	No	No	-10.19	2	1	1	1	2	0.11	0	5	2	5.12
DBB12988	N=CN1[C@@H](CN=C2C=CC(=C(N[C@H](C(O)O)/C=C/C(=O)O)O)C=C2)CNc2c1c(O)nc(n2)N	C20H24N8O6	472.45	34	6	0.25	8	10	9	129.95	233.53	1.04	-1.32	-1.73	-1.63	-2.2	-1.17	-1.54	13.6	0.0288	Very soluble	-3.09	0.388	0.000821	Soluble	0.54	1640	3.47	Soluble	Low	No	No	No	No	No	No	No	-10.12	2	1	1	1	2	0.11	0	5	2	5.23
DBB13002	OC(=O)/C=C/[C@H](C(O)O)NC(=C1C=CC(=NC[C@H]2CNc3c(N2C)c(O)nc(n3)N)C=C1)O	C20H25N7O6	459.46	33	6	0.3	7	9	8	126.36	209.68	1.62	-0.66	-1.7	-1.22	-2.05	-0.8	-1.95	5.21	0.0113	Very soluble	-3.27	0.247	0.000538	Soluble	0.23	784	1.71	Soluble	Low	No	No	No	No	No	No	No	-9.57	2	1	1	1	2	0.11	0	4	1	5.19
DBB13044	COc1cc(/C=C/C(=O)NCCc2c[nH]c3c2cccc3)ccc1O	C20H20N2O3	336.38	25	15	0.15	7	3	3	98.81	74.35	2.74	3.32	3.15	1.81	4.07	3.02	-4	0.0337	0.0001	Soluble	-4.56	0.00931	2.77e-05	Moderately soluble	-6.22	0.000202	6e-07	Poorly soluble	High	Yes	No	Yes	Yes	Yes	Yes	Yes	-5.99	0	0	0	0	0	0.55	0	1	0	2.66
DBB13116	O=C(C(C)C)CC[C@@]1(C)C=Cc2c(O1)c1ccccc1n(c2=O)C	C20H23NO3	325.4	24	10	0.4	4	3	0	97.83	48.3	3.38	2.86	3.6	2.89	4.17	3.38	-3.7	0.0644	0.000198	Soluble	-3.53	0.0953	0.000293	Soluble	-5.21	0.00203	6.24e-06	Moderately soluble	High	Yes	No	No	Yes	Yes	No	Yes	-6.25	0	0	0	0	0	0.55	0	0	0	4.01
DBB13135	CCO[C@@H](c1ccc(cc1)OC)CNC(=O)/C=C/c1ccccc1	C20H23NO3	325.4	24	12	0.25	9	3	1	95.63	47.56	3.5	3.34	3.17	2.64	4.12	3.36	-3.74	0.0595	0.000183	Soluble	-4.02	0.0314	9.64e-05	Moderately soluble	-6.09	0.000262	8.05e-07	Poorly soluble	High	Yes	No	Yes	Yes	Yes	Yes	Yes	-5.91	0	0	0	0	0	0.55	0	1	1	3.19
DBB13317	COC(=O)N1CCc2c3[C@H]1Cc1ccc(cc1c3c(c(c2)OC)OC)O	C20H21NO5	355.38	26	12	0.35	4	5	1	100.46	68.23	3.22	2.94	2.59	2.04	2.9	2.74	-3.97	0.0378	0.000106	Soluble	-4.03	0.0328	9.23e-05	Moderately soluble	-4.84	0.00518	1.46e-05	Moderately soluble	High	Yes	Yes	Yes	Yes	Yes	Yes	Yes	-6.38	0	0	0	0	0	0.55	0	0	1	3.64
DBB13483	CO[C@H](/C(=N\C(=O)/C(=N/CCC(C)(C)C)/CC(O)O)/Cc1ccccc1)O	C20H30N2O5	378.46	27	6	0.55	11	7	3	105.78	111.71	3.17	1.74	1.74	1.31	3.71	2.33	-2.72	0.719	0.0019	Soluble	-3.7	0.075	0.000198	Soluble	-3.8	0.0597	0.000158	Soluble	High	No	No	No	No	No	No	No	-7.37	0	0	1	0	0	0.55	0	2	2	4.39
DBB13536	COc1cc(CCC(=O)CC(=O)CCc2ccccc2)ccc1O	C20H22O4	326.39	24	12	0.3	9	4	1	93.65	63.6	3.16	2.86	3.49	2.51	4.78	3.36	-3.44	0.118	0.000362	Soluble	-3.85	0.0456	0.00014	Soluble	-6.36	0.000141	4.33e-07	Poorly soluble	High	Yes	No	Yes	Yes	No	Yes	Yes	-6.26	0	0	0	0	0	0.55	0	1	1	2.27
DBB13550	CO[C@H](CC(=O)CCc1ccccc1)CCc1ccc(cc1)O	C20H24O3	312.4	23	12	0.35	9	3	1	92.85	46.53	2.98	3.65	3.93	3.17	4.92	3.73	-3.87	0.0423	0.000135	Soluble	-4.32	0.0151	4.83e-05	Moderately soluble	-6.47	0.000106	3.38e-07	Poorly soluble	High	Yes	No	Yes	Yes	No	Yes	Yes	-5.61	0	0	0	0	0	0.55	0	0	2	2.74
DBB13565	CCCCCCCCCCCc1cc(O)c2c(n1)cccc2	C20H29NO	299.45	22	10	0.55	10	2	1	96.8	33.12	4.17	7.36	6.01	4.04	6.16	5.55	-6.01	0.000293	9.78e-07	Poorly soluble	-7.88	3.91e-06	1.31e-08	Poorly soluble	-7.55	8.44e-06	2.82e-08	Poorly soluble	High	No	No	Yes	Yes	No	Yes	No	-2.9	0	1	0	1	1	0.55	0	0	2	2.66
DBB13569	C=C[C@H](C(=O)O[C@@H]1c2c(C[C@@H]3[C@]1(C)[C@H](C)C(=O)CC3)oc(c2C)O)C	C20H26O5	346.42	25	5	0.6	4	5	1	94.64	76.74	2.98	3.73	3.55	2.43	4.03	3.34	-4.22	0.0208	6e-05	Moderately soluble	-5.03	0.00321	9.26e-06	Moderately soluble	-4.14	0.0253	7.31e-05	Moderately soluble	High	Yes	No	No	No	No	No	Yes	-5.76	0	0	0	0	0	0.55	0	1	1	5.16
DBB13716	Oc1cc(CCCCc2ccc3c(c2)OCO3)nc2c1cccc2	C20H19NO3	321.37	24	16	0.25	5	4	1	93.7	51.58	3.31	4.8	4.23	3.02	4.86	4.04	-5.02	0.00307	9.55e-06	Moderately soluble	-5.62	0.000779	2.42e-06	Moderately soluble	-6.99	3.27e-05	1.02e-07	Poorly soluble	High	Yes	Yes	Yes	Yes	Yes	Yes	Yes	-4.85	0	0	0	0	0	0.55	0	0	1	2.74
DBB13793	COc1cc(CC[C@H](CC(=O)CCc2ccccc2)O)ccc1O	C20H24O4	328.4	24	12	0.35	9	4	2	94.61	66.76	2.5	3.08	3.29	2.58	4.45	3.18	-3.59	0.0839	0.000256	Soluble	-4.15	0.0233	7.09e-05	Moderately soluble	-5.89	0.000426	1.3e-06	Moderately soluble	High	Yes	No	Yes	No	No	Yes	Yes	-6.12	0	0	0	0	0	0.55	0	0	1	2.86
DBB13805	COc1cccc2c1n(C)c1c(c2=O)c(O)cc2c1C=CC(O2)(C)C	C20H19NO4	337.37	25	14	0.25	1	4	1	99.61	60.69	3.48	3.87	3.48	1.94	3.49	3.25	-4.72	0.00646	1.91e-05	Moderately soluble	-4.84	0.00486	1.44e-05	Moderately soluble	-5.23	0.00197	5.85e-06	Moderately soluble	High	Yes	No	Yes	Yes	Yes	Yes	Yes	-5.61	0	0	0	0	0	0.55	0	1	1	3.47
DBB13825	OC(=O)/C=C/[C@H](C(O)O)NC(=C1C=CC(=NC[C@H]2CN=C3[C@H](N2)C(=O)NC(=N)N3)C=C1)O	C19H23N7O6	445.43	32	0	0.32	7	10	9	128.31	211.75	0.8	-4.67	-3.9	-1.71	-1.32	-2.16	0.8	2830	6.35	Highly soluble	0.85	3140	7.05	Highly soluble	-0.16	310	0.697	Soluble	Low	No	No	No	No	No	No	No	-12.33	2	1	1	1	3	0.17	0	4	1	5.71
DBB13830	O=C(Cc1c[nH]c2c1cccc2)N[C@@H](C(=O)O)Cc1ccc(cc1)O	C19H18N2O4	338.36	25	15	0.16	7	4	4	93.78	102.42	1.43	1.66	2.23	1.31	2.95	1.92	-2.97	0.366	0.00108	Soluble	-3.42	0.127	0.000376	Soluble	-5.43	0.00127	3.75e-06	Moderately soluble	High	No	Yes	No	No	No	Yes	No	-7.19	0	0	0	0	0	0.56	0	0	0	2.69
DBB13831	O=C(Cc1c[nH]c2c1cccc2)N[C@@H](C(=O)O)Cc1ccccc1	C19H18N2O3	322.36	24	15	0.16	7	3	3	91.75	82.19	1.39	2	2.52	1.86	3.42	2.24	-3.1	0.257	0.000796	Soluble	-3.35	0.143	0.000444	Soluble	-6.01	0.000315	9.77e-07	Poorly soluble	High	No	Yes	No	No	No	Yes	No	-6.85	0	0	0	0	0	0.56	0	0	0	2.65
DBB13839	OC(=O)/C=C/[C@H](C(O)O)NC(=O)c1ccc(cc1)NC[C@H]1CNC2=NC(=NC(=O)C2=N1)N	C19H21N7O6	443.41	32	6	0.26	9	9	7	126.86	211.09	0.27	-1.94	-3.9	-1.65	0.12	-1.42	-0.91	54.3	0.123	Very soluble	-1.97	4.74	0.0107	Very soluble	-2.26	2.44	0.00551	Soluble	Low	No	No	No	No	No	No	No	-10.38	2	1	1	1	2	0.17	0	2	2	4.84
DBB13916	OC(=O)/C=C/[C@H](C(O)O)NC(=C1C=CC(=NC[C@@H]2CN=C3[C@H](N2)C(=O)NC(=N)N3)C=C1)O	C19H23N7O6	445.43	32	0	0.32	7	10	9	128.31	211.75	0.11	-4.67	-3.9	-1.71	-1.32	-2.3	0.8	2830	6.35	Highly soluble	0.85	3140	7.05	Highly soluble	-0.16	310	0.697	Soluble	Low	No	No	No	No	No	No	No	-12.33	2	1	1	1	3	0.17	0	4	1	5.71
DBB13917	OC(=O)/C=C/[C@H](C(O)O)NC(=O)c1ccc(cc1)NCc1cnc2c(n1)c(N)nc(n2)N	C19H20N8O5	440.41	32	16	0.16	9	9	7	113.58	222.49	0.58	-1.43	-1.08	-1.77	-1.12	-0.96	-1.45	15.8	0.0358	Very soluble	-2.74	0.802	0.00182	Soluble	-3.14	0.322	0.000731	Soluble	Low	No	No	No	No	No	No	No	-10	2	1	1	1	2	0.11	0	2	2	3.73
DBB13919	OC(=O)/C=C/[C@@H](C(O)O)NC(=O)c1ccc(cc1)NC[C@H]1CNC2=NC(=NC(=O)C2=N1)N	C19H21N7O6	443.41	32	6	0.26	9	9	7	126.86	211.09	0.8	-1.94	-3.9	-1.65	0.12	-1.31	-0.91	54.3	0.123	Very soluble	-1.97	4.74	0.0107	Very soluble	-2.26	2.44	0.00551	Soluble	Low	No	No	No	No	No	No	No	-10.38	2	1	1	1	2	0.17	0	2	2	4.84
DBB13958	O=C(/C=C/c1ccc(cc1)O)NCCc1c[nH]c2c1cccc2	C19H18N2O2	306.36	23	15	0.11	6	2	3	92.32	65.12	2.15	2.69	3.14	2.14	4	2.82	-3.52	0.0924	0.000301	Soluble	-3.71	0.0597	0.000195	Soluble	-6.11	0.000237	7.74e-07	Poorly soluble	High	Yes	Yes	Yes	Yes	No	Yes	No	-6.26	0	0	0	0	0	0.55	0	1	0	2.43
DBB14051	CC[C@@]12CCC(=O)Nc3c(c4c2n(C(=O)C=C1)cc4)cccc3	C19H18N2O2	306.36	23	11	0.26	1	2	1	92.98	51.1	2.31	2.67	3.17	2.8	2.93	2.78	-3.71	0.0598	0.000195	Soluble	-3.39	0.123	0.000403	Soluble	-5.37	0.00132	4.31e-06	Moderately soluble	High	Yes	Yes	Yes	Yes	No	Yes	Yes	-6.27	0	0	0	0	0	0.55	0	0	0	4.38
DBB14117	COC(=O)N1CCc2c3[C@H]1Cc1ccccc1c3c(c(c2Cl)O)OC	C19H18ClNO4	359.8	25	12	0.32	3	4	1	98.98	59	3.39	3.59	3.24	2.85	3.48	3.31	-4.49	0.0117	3.24e-05	Moderately soluble	-4.52	0.011	3.05e-05	Moderately soluble	-5.32	0.00172	4.78e-06	Moderately soluble	High	Yes	Yes	Yes	Yes	Yes	Yes	Yes	-5.95	0	0	0	0	0	0.55	0	0	2	3.58
DBB14118	COC(=O)N1CCc2c3[C@H]1Cc1ccccc1c3c(c(c2)O)OC	C19H19NO4	325.36	24	12	0.32	3	4	1	93.97	59	3.11	2.97	2.58	2.35	2.84	2.77	-3.9	0.0409	0.000126	Soluble	-3.87	0.0437	0.000134	Soluble	-4.73	0.0061	1.87e-05	Moderately soluble	High	Yes	Yes	Yes	Yes	Yes	Yes	Yes	-6.18	0	0	0	0	0	0.55	0	0	0	3.46
DBB14163	OC(=O)/C=C/[C@H](C(O)O)NC(=O)c1ccc(cc1)NCc1cnc2c(n1)c(=O)[nH]c(n2)N	C19H19N7O6	441.4	32	16	0.16	9	9	7	112	216.44	-0.03	-1.91	-1.38	-1.7	-0.26	-1.05	-1.15	31.3	0.0709	Very soluble	-2.11	3.39	0.00768	Soluble	-3.4	0.175	0.000397	Soluble	Low	No	No	No	No	No	No	No	-10.35	2	1	1	1	2	0.11	0	2	2	3.68
DBB14180	COC(=O)Cc1ccccc1	C9H10O2	150.17	11	6	0.22	3	2	0	42.31	26.3	2.02	1.83	1.4	1.98	2.03	1.85	-2.13	1.11	0.00742	Soluble	-2	1.49	0.00994	Soluble	-2.86	0.208	0.00138	Soluble	High	Yes	No	Yes	No	No	No	No	-5.92	0	1	0	0	1	0.55	0	0	1	1.18
DBB14287	O[C@H](CC(=O)CCc1ccccc1)CCc1ccc(cc1)O	C19H22O3	298.38	22	12	0.32	8	3	2	88.12	57.53	2.69	3.11	3.28	2.94	4.38	3.28	-3.52	0.0891	0.000299	Soluble	-3.99	0.0308	0.000103	Soluble	-5.78	0.000501	1.68e-06	Moderately soluble	High	Yes	No	Yes	No	No	Yes	Yes	-5.91	0	0	0	0	0	0.55	0	0	1	2.48
DBB14346	COC(=O)c1ccc2c(c1)c1ccccc1[nH]2	C14H11NO2	225.24	17	13	0.07	2	2	1	67.08	42.09	2.19	3.24	3.11	2.56	3.43	2.91	-3.71	0.0438	0.000194	Soluble	-3.8	0.0359	0.00016	Soluble	-5.04	0.00204	9.06e-06	Moderately soluble	High	Yes	No	Yes	No	No	No	No	-5.37	0	0	0	0	0	0.55	0	0	1	1.45
DBB14485	CC(C(=O)OC(c1ccccc1)(C)C)C	C13H18O2	206.28	15	6	0.46	4	2	0	61.42	26.3	2.89	3.24	3.01	3.13	3.01	3.06	-3.19	0.133	0.000642	Soluble	-3.47	0.0706	0.000342	Soluble	-3.74	0.0377	0.000183	Soluble	High	Yes	No	No	No	No	No	No	-5.26	0	0	0	0	0	0.55	0	0	1	1.55
DBB14496	CC(=O)N1CCc2c3[C@H]1Cc1ccccc1c3c1c(c2)OCO1	C19H17NO3	307.34	23	12	0.32	1	3	0	90.04	38.77	3.02	2.76	2.38	2.78	3.63	2.91	-3.8	0.0482	0.000157	Soluble	-3.23	0.181	0.00059	Soluble	-5.2	0.00195	6.35e-06	Moderately soluble	High	Yes	Yes	Yes	Yes	Yes	Yes	Yes	-6.22	0	0	0	0	0	0.55	0	0	0	3.47
DBB14512	CC[C@]12CCC[N@+](C2)([O-])CC[C@]2(C(=Nc3c2cccc3)CC1)O	C19H26N2O2	314.42	23	6	0.63	1	3	1	101.44	62.02	2.2	2.1	2.78	0.92	3.03	2.2	-3.24	0.181	0.000576	Soluble	-3.03	0.292	0.000927	Soluble	-5.13	0.0023	7.33e-06	Moderately soluble	High	Yes	Yes	No	No	No	Yes	No	-6.73	0	0	0	0	0	0.55	0	1	0	5.47
DBB14677	O=C1[C@H](CCc2c1c1ccccc1n2C)Cn1ccnc1C	C18H19N3O	293.36	22	14	0.33	2	2	0	87.39	39.82	2.33	2.29	3.13	1.75	2.95	2.49	-3.44	0.106	0.000363	Soluble	-2.76	0.505	0.00172	Soluble	-4.93	0.00348	1.19e-05	Moderately soluble	High	Yes	Yes	Yes	Yes	No	Yes	Yes	-6.46	0	0	0	0	0	0.55	0	0	0	3.13
DBB14678	O=C1NC(=O)[C@@H](S1)Cc1ccc(cc1)OCCN(c1ccccn1)C	C18H19N3O3S	357.43	25	12	0.28	7	4	1	101.63	96.83	2.41	3.11	2.11	1.64	2.54	2.36	-3.91	0.0441	0.000123	Soluble	-4.81	0.00551	1.54e-05	Moderately soluble	-5.71	0.000689	1.93e-06	Moderately soluble	High	No	No	No	Yes	Yes	Yes	Yes	-6.27	0	0	0	0	0	0.55	0	1	1	3.35
DBB1474	CCCCCCCCCCCCCCCC(=O)NCCc1c[nH]c2c1cccc2	C26H42N2O	398.62	29	9	0.65	18	1	2	127.99	44.89	5	8.28	7.31	4.54	8.37	6.7	-6.57	0.000107	2.69e-07	Poorly soluble	-9.09	3.27e-07	8.2e-10	Poorly soluble	-10.07	3.39e-08	8.51e-11	Insoluble	Low	No	Yes	Yes	Yes	No	Yes	Yes	-2.85	1	2	1	1	2	0.55	0	0	3	3.14
DBB15017	COc1cc(CNC(=O)CCCC/C=C/C(C)C)ccc1O	C18H27NO3	305.41	22	6	0.5	10	3	2	90.52	58.56	3.15	3.58	3.64	2.69	4.1	3.43	-3.53	0.09	0.000295	Soluble	-4.5	0.00975	3.19e-05	Moderately soluble	-4.87	0.00408	1.34e-05	Moderately soluble	High	Yes	No	Yes	No	No	Yes	Yes	-5.62	0	0	0	0	0	0.55	0	1	2	2.32
DBB15079	COc1cc(CCC(=O)NCCc2ccc(cc2)O)ccc1O	C18H21NO4	315.36	23	12	0.28	8	4	3	88.66	78.79	2.64	1.71	2.4	1.97	3.19	2.38	-2.73	0.586	0.00186	Soluble	-2.98	0.33	0.00105	Soluble	-5.49	0.00101	3.21e-06	Moderately soluble	High	No	No	No	No	No	Yes	No	-7.01	0	0	0	0	0	0.55	0	0	1	2.07
DBB15086	COc1cc(/C=C/C(=O)NC[C@@H](c2ccc(cc2)O)O)ccc1O	C18H19NO5	329.35	24	12	0.17	7	5	4	90.14	99.02	2.22	1.75	1.54	1.08	2.24	1.76	-2.89	0.422	0.00128	Soluble	-3.45	0.118	0.000358	Soluble	-3.83	0.0482	0.000146	Soluble	High	No	No	No	No	No	Yes	No	-7.07	0	0	0	0	0	0.55	0	1	0	3.05
DBB15253	COc1cc(ccc1O)C(=O)NCC(=O)O	C10H11NO5	225.2	16	6	0.2	5	5	3	54.53	95.86	1.13	0.78	0.22	0.04	0.26	0.48	-1.68	4.76	0.0211	Very soluble	-2.37	0.953	0.00423	Soluble	-1.74	4.13	0.0183	Soluble	High	No	No	No	No	No	No	No	-7.12	0	0	0	0	0	0.56	0	0	1	1.56
DBB15434	O=C(N[C@H](C(=O)O)Cc1ccccc1)Cc1ccccc1	C17H17NO3	283.32	21	12	0.18	7	3	2	79.9	66.4	2.09	2.52	2.04	2.49	2.84	2.4	-3.15	0.203	0.000716	Soluble	-3.56	0.0779	0.000275	Soluble	-5.14	0.00204	7.21e-06	Moderately soluble	High	Yes	No	No	No	No	No	No	-6.24	0	0	0	0	0	0.56	0	0	0	2.32
DBB1548	NC(=N)NCCC[C@H](C(=O)/N=C(/[C@H](N1CCC[C@H]1C(=O)N[C@H](C(=O)O)Cc1ccc(cc1)O)O)\Cc1cnc[nH]1)N	C26H37N9O6	571.63	41	11	0.46	17	11	9	153.3	256.13	1.44	-3.22	-1.57	-1.52	0.28	-0.92	-0.43	211	0.37	Very soluble	-1.59	14.7	0.0258	Very soluble	-3.57	0.155	0.000272	Soluble	Low	No	No	No	No	No	No	No	-12.07	3	4	2	1	5	0.17	0	2	2	5.62
DBB1549	CC[C@@H](C(=N)[C@@H](N1CCC[C@@H]1C(=O)N[C@@H](C(=O)N[C@H]([C@@H](CC)C)C(=O)O)Cc1ccc(cc1)O)O)C	C26H40N4O6	504.62	36	6	0.62	15	8	6	141.99	163.05	2.38	0.84	1.5	0.46	2.52	1.54	-2.63	1.18	0.00234	Soluble	-3.85	0.0718	0.000142	Soluble	-3.75	0.0891	0.000177	Soluble	Low	No	Yes	No	No	No	No	No	-8.78	2	3	2	1	2	0.17	0	1	2	5.03
DBB15647	COc1cc(CNC(=O)CCCCCC(C)C)ccc1O	C17H27NO3	293.4	21	6	0.59	10	3	2	86.19	58.56	2.82	3.23	3.47	2.54	3.87	3.18	-3.25	0.167	0.000568	Soluble	-4.13	0.0216	7.37e-05	Moderately soluble	-5.19	0.00188	6.4e-06	Moderately soluble	High	Yes	No	Yes	No	No	Yes	No	-5.8	0	0	0	0	0	0.55	0	0	1	2.06
DBB15649	COc1cc(CNC(=O)CCC/C=C/C(C)C)ccc1O	C17H25NO3	291.39	21	6	0.47	9	3	2	85.71	58.56	2.97	2.37	3.25	2.46	3.69	2.95	-2.76	0.51	0.00175	Soluble	-3.24	0.168	0.000575	Soluble	-4.47	0.00976	3.35e-05	Moderately soluble	High	Yes	No	Yes	No	No	Yes	No	-6.39	0	0	0	0	0	0.55	0	1	1	2.24
DBB15744	OCc1ccc(o1)c1[nH]c(cc2c1nc1c2cccc1)C(=O)O	C17H12N2O4	308.29	23	18	0.06	3	5	3	84.39	99.35	1.83	1.77	3.01	0.63	3.21	2.09	-3.25	0.174	0.000565	Soluble	-3.47	0.103	0.000336	Soluble	-5.51	0.000962	3.12e-06	Moderately soluble	High	No	Yes	Yes	No	No	Yes	No	-6.92	0	0	0	0	0	0.56	0	0	0	3.11
DBB15928	CC[C@H](C(=O)OCC)Cc1ccccc1	C13H18O2	206.28	15	6	0.46	6	2	0	61.54	26.3	2.93	3.3	2.82	3.13	3.34	3.1	-3.1	0.165	0.000798	Soluble	-3.53	0.0612	0.000297	Soluble	-4.13	0.0153	7.43e-05	Moderately soluble	High	Yes	No	No	No	No	Yes	No	-5.22	0	0	0	0	0	0.55	0	0	1	2.01
DBB16004	O=C(/C=C/c1ccccc1)NC[C@H](c1ccc(cc1)O)O	C17H17NO3	283.32	21	12	0.12	6	3	3	81.63	69.56	2.05	2.11	1.82	1.95	2.64	2.11	-2.95	0.316	0.00111	Soluble	-3.2	0.178	0.000629	Soluble	-4.3	0.0141	4.97e-05	Moderately soluble	High	Yes	No	No	No	No	Yes	No	-6.53	0	0	0	0	0	0.55	0	1	0	2.76
DBB16042	CCCCCCCCC(=O)NCc1ccc(c(c1)OC)O	C17H27NO3	293.4	21	6	0.59	11	3	2	86.19	58.56	3.51	3.52	3.62	2.54	4.04	3.44	-3.36	0.127	0.000434	Soluble	-4.43	0.0108	3.68e-05	Moderately soluble	-5.57	0.000793	2.7e-06	Moderately soluble	High	Yes	No	Yes	No	No	Yes	No	-5.59	0	0	1	0	0	0.55	0	0	2	2.06
DBB16230	Oc1ccc([nH]1)[C@@H](/N=C(/[C@H](N1CCC[C@@H]1C(=O)N)O)\Cc1[nH]cnc1)O	C16H22N6O4	362.38	26	10	0.44	7	7	6	96.48	163.85	1.06	-1.28	-1.32	-1.09	0.28	-0.47	-1.1	28.6	0.0789	Very soluble	-1.66	7.86	0.0217	Very soluble	-1.59	9.31	0.0257	Soluble	Low	No	No	No	No	No	No	No	-9.42	1	1	1	1	2	0.55	0	1	1	4.44
DBB16241	CC(=O)OCc1cccc(c1)C	C10H12O2	164.2	12	6	0.3	3	2	0	47.27	26.3	2.39	2.32	1.91	2.29	2.51	2.28	-2.49	0.529	0.00322	Soluble	-2.51	0.506	0.00308	Soluble	-3.26	0.0911	0.000555	Soluble	High	Yes	No	Yes	No	No	No	No	-5.65	0	0	0	0	1	0.55	0	0	1	1.41
DBB16251	CC(C(=O)OCc1ccccc1)C	C11H14O2	178.23	13	6	0.36	4	2	0	51.92	26.3	2.58	3	2.23	2.58	2.58	2.59	-2.91	0.218	0.00122	Soluble	-3.22	0.108	0.000607	Soluble	-3.31	0.0869	0.000488	Soluble	High	Yes	No	No	No	No	No	No	-5.26	0	0	0	0	1	0.55	0	0	1	1.36
DBB16255	O=C(CC(=O)C)OCc1ccccc1	C11H12O3	192.21	14	6	0.27	5	3	0	52.12	43.37	2.07	1.85	1.56	1.61	2.3	1.88	-2.18	1.26	0.00654	Soluble	-2.38	0.798	0.00415	Soluble	-3.23	0.112	0.000582	Soluble	High	Yes	No	Yes	No	No	No	No	-6.16	0	0	0	0	1	0.55	0	1	1	1.62
DBB16295	C[C@H]1ON([C@@H](/C/1=N/C(=O)c1ccccc1O)O)CCc1cnc[nH]1	C16H18N4O4	330.34	24	11	0.31	5	7	3	89.96	111.04	1.73	1.85	0.51	0.42	1.4	1.18	-3.06	0.286	0.000865	Soluble	-3.8	0.052	0.000157	Soluble	-3.2	0.208	0.00063	Soluble	High	No	Yes	No	No	No	No	No	-7	0	0	0	0	0	0.55	0	1	0	4.16
DBB16360	CCOC(=O)c1cnc2n(c1O)nc(c2C)c1ccccc1	C16H15N3O3	297.31	22	15	0.19	4	5	1	81.5	76.72	2.56	3.1	2.59	2.43	2.18	2.57	-3.88	0.0395	0.000133	Soluble	-4.38	0.0124	4.18e-05	Moderately soluble	-4.51	0.0091	3.06e-05	Moderately soluble	High	Yes	No	Yes	Yes	Yes	No	No	-5.91	0	0	0	0	0	0.55	0	0	0	2.81
DBB16417	CCCC(=O)O[C@@H](c1ccccc1)C	C12H16O2	192.25	14	6	0.42	5	2	0	56.73	26.3	2.78	2.84	2.77	2.86	2.95	2.84	-2.81	0.299	0.00155	Soluble	-3.05	0.171	0.00089	Soluble	-3.72	0.0365	0.00019	Soluble	High	Yes	No	No	No	No	No	No	-5.46	0	0	0	0	1	0.55	0	0	1	2.03
DBB16429	CC[C@H](c1ccccc1)OC(=O)CCC	C13H18O2	206.28	15	6	0.46	6	2	0	61.54	26.3	2.93	3.37	3.16	3.13	3.34	3.19	-3.14	0.149	0.000721	Soluble	-3.6	0.0517	0.000251	Soluble	-4.13	0.0153	7.43e-05	Moderately soluble	High	Yes	No	No	No	No	No	No	-5.17	0	0	0	0	0	0.55	0	0	1	2.22
DBB16430	O=C(Nc1ccccc1C(=O)O)/C=C/c1ccc(cc1)O	C16H13NO4	283.28	21	12	0	5	4	3	79.35	86.63	1.59	3.61	2.44	2.15	2.1	2.38	-3.96	0.0308	0.000109	Soluble	-5.12	0.00217	7.65e-06	Moderately soluble	-3.8	0.0449	0.000158	Soluble	High	No	No	No	No	Yes	No	No	-5.46	0	0	0	0	0	0.56	0	1	1	2.24
DBB16540	CCCCCCCC(=O)NCc1ccc(c(c1)OC)O	C16H25NO3	279.37	20	6	0.56	10	3	2	81.38	58.56	3.41	2.97	3.23	2.3	3.63	3.11	-3.01	0.276	0.000988	Soluble	-3.86	0.0383	0.000137	Soluble	-5.17	0.00189	6.78e-06	Moderately soluble	High	Yes	No	Yes	No	No	Yes	No	-5.9	0	0	0	0	0	0.55	0	0	1	1.95
DBB16543	COc1cc(CNC(=O)CC/C=C/C(C)C)ccc1O	C16H23NO3	277.36	20	6	0.44	8	3	2	80.91	58.56	3.04	2.01	2.86	2.21	3.28	2.68	-2.52	0.838	0.00302	Soluble	-2.87	0.377	0.00136	Soluble	-4.08	0.0233	8.39e-05	Moderately soluble	High	Yes	No	Yes	No	No	Yes	No	-6.56	0	0	0	0	0	0.55	0	1	1	2.2
DBB16828	CCCCCCCCNC(=O)c1ccc(c(c1)OC)O	C16H25NO3	279.37	20	6	0.56	10	3	2	81.6	58.56	3.33	4.12	3.49	2.57	3.63	3.43	-3.73	0.0521	0.000186	Soluble	-5.06	0.00245	8.78e-06	Moderately soluble	-5.17	0.00189	6.78e-06	Moderately soluble	High	Yes	No	Yes	No	No	Yes	No	-5.08	0	0	0	0	0	0.55	0	0	2	2.06
DBB16900	COc1ccc(cc1)[C@H](CNC(=O)c1ccccc1)O	C16H17NO3	271.31	20	12	0.19	6	3	2	76.39	58.56	2.28	2.01	1.83	2.05	2.58	2.15	-2.84	0.395	0.00146	Soluble	-2.87	0.369	0.00136	Soluble	-4.92	0.00325	1.2e-05	Moderately soluble	High	Yes	No	No	No	No	Yes	No	-6.53	0	0	0	0	0	0.55	0	0	0	2.11
DBB16914	CCOC(=O)CC(=O)N[C@H](C(=O)O)Cc1c[nH]c2c1c(Cl)ccc2	C16H17ClN2O5	352.77	24	9	0.31	9	5	3	87.98	108.49	1.29	2.27	1.89	1.01	2.83	1.86	-3.14	0.255	0.000723	Soluble	-4.19	0.023	6.53e-05	Moderately soluble	-4.57	0.00945	2.68e-05	Moderately soluble	High	No	Yes	No	No	No	No	No	-6.84	0	0	0	0	0	0.56	0	1	2	2.84
DBB16933	COc1ccc(c(c1)O)C(=O)CCc1ccccc1	C16H16O3	256.3	19	12	0.19	5	3	1	74.45	46.53	2.56	3.87	3.22	2.49	3.66	3.16	-4	0.0254	9.9e-05	Moderately soluble	-4.54	0.00732	2.86e-05	Moderately soluble	-5.23	0.00151	5.9e-06	Moderately soluble	High	Yes	No	Yes	Yes	No	Yes	No	-5.12	0	0	0	0	0	0.55	0	0	1	1.96
DBB16948	CCOC(=O)CC(=O)N[C@H](C(=O)O)Cc1c[nH]c2c1c(Cl)ccc2	C16H17ClN2O5	352.77	24	9	0.31	9	5	3	87.98	108.49	1.29	2.27	1.89	1.01	2.83	1.86	-3.14	0.255	0.000723	Soluble	-4.19	0.023	6.53e-05	Moderately soluble	-4.57	0.00945	2.68e-05	Moderately soluble	High	No	Yes	No	No	No	No	No	-6.84	0	0	0	0	0	0.56	0	1	2	2.84
DBB16996	O=C(Nc1ccccc1C(=O)O)/C=C/c1ccc(cc1)O	C16H13NO4	283.28	21	12	0	5	4	3	79.35	86.63	1.59	3.61	2.44	2.15	2.1	2.38	-3.96	0.0308	0.000109	Soluble	-5.12	0.00217	7.65e-06	Moderately soluble	-3.8	0.0449	0.000158	Soluble	High	No	No	No	No	Yes	No	No	-5.46	0	0	0	0	0	0.56	0	1	1	2.24
DBB1701	OC[C@H]1NC(=O)[C@@H](NC(=O)[C@H](NC(=O)CNC(=O)[C@@H]2N([C@H](/C(=N/C1=O)/C)O)CCC2)Cc1ccccc1)C(C)C	C27H38N6O7	558.63	40	6	0.56	4	9	6	167.33	189.53	3.04	0.38	-4.05	-1.22	0.14	-0.34	-3.39	0.228	0.000407	Soluble	-3.93	0.0663	0.000119	Soluble	-5.06	0.00489	8.75e-06	Moderately soluble	Low	No	Yes	No	No	No	No	No	-9.44	3	4	1	1	2	0.17	0	0	1	6.15
DBB17037	O=C(Cc1c[nH]c2c1cccc2)N[C@H](C(O)O)/C=C/C(=O)N	C15H17N3O4	303.31	22	9	0.2	7	4	5	79.87	128.44	0.58	-0.84	-0.45	-0.57	0.88	-0.08	-1.03	28.2	0.0929	Very soluble	-1.38	12.7	0.042	Very soluble	-2.3	1.51	0.00498	Soluble	High	No	No	No	No	No	No	No	-8.75	0	1	0	0	0	0.55	0	2	0	2.96
DBB17114	O=C(Cc1c[nH]c2c1cccc2)N[C@H](C(O)O)/C=C/C(=O)N	C15H17N3O4	303.31	22	9	0.2	7	4	5	79.87	128.44	0.58	-0.84	-0.45	-0.57	0.88	-0.08	-1.03	28.2	0.0929	Very soluble	-1.38	12.7	0.042	Very soluble	-2.3	1.51	0.00498	Soluble	High	No	No	No	No	No	No	No	-8.75	0	1	0	0	0	0.55	0	2	0	2.96
DBB17132	OC([C@@H](NC(=O)CCCc1ccccc1)/C=C/C(=O)N)O	C15H20N2O4	292.33	21	6	0.33	9	4	4	77.62	112.65	1.31	-0.21	-0.15	0.51	1.04	0.5	-1.14	21.3	0.0728	Very soluble	-1.7	5.85	0.02	Very soluble	-2.23	1.71	0.00586	Soluble	High	No	No	No	No	No	No	No	-8.23	0	0	0	0	0	0.55	0	2	1	2.91
DBB17529	CC(C(=O)OC(CCc1ccccc1)(C)C)C	C15H22O2	234.33	17	6	0.53	6	2	0	71.19	26.3	3.31	4.09	3.6	3.65	3.81	3.69	-3.73	0.0432	0.000184	Soluble	-4.35	0.0105	4.49e-05	Moderately soluble	-4.55	0.00662	2.82e-05	Moderately soluble	High	Yes	No	No	No	No	Yes	No	-4.83	0	0	0	0	0	0.55	0	0	2	1.74
DBB17840	CC[C@H](C(=O)Oc1ccc(cc1[C@H]1O[C@H]1C)OC)C	C15H20O4	264.32	19	6	0.53	6	4	0	72.41	48.06	3.18	2.94	2.78	2.06	3.45	2.88	-3.17	0.179	0.000678	Soluble	-3.61	0.0647	0.000245	Soluble	-3.66	0.0576	0.000218	Soluble	High	Yes	No	No	No	No	Yes	No	-5.82	0	0	0	0	0	0.55	0	2	0	3.59
DBB18117	CCCC(NC(=O)c1ccc2c(c1)OCO2)CCC	C15H21NO3	263.33	19	6	0.53	7	3	1	74.34	47.56	3.26	4.47	3.11	2.33	3.42	3.32	-4.06	0.0229	8.7e-05	Moderately soluble	-5.19	0.00171	6.48e-06	Moderately soluble	-4.59	0.00669	2.54e-05	Moderately soluble	High	Yes	No	Yes	Yes	No	Yes	No	-4.73	0	0	0	0	0	0.55	0	0	1	2.35
DBB18440	OC(=O)[C@H](c1ccc(c(c1)F)c1ccccc1)C	C15H13FO2	244.26	18	12	0.13	3	3	1	68.19	37.3	2.19	4.16	4.1	3.79	3.87	3.62	-4.27	0.0131	5.36e-05	Moderately soluble	-4.65	0.00545	2.23e-05	Moderately soluble	-5.01	0.00239	9.79e-06	Moderately soluble	High	Yes	No	No	No	No	No	No	-4.84	0	0	0	0	0	0.56	0	0	2	2.45
DBB18441	OC(=O)[C@H](c1ccc(c(c1)F)c1ccccc1)C	C15H13FO2	244.26	18	12	0.13	3	3	1	68.19	37.3	2.19	4.16	4.1	3.79	3.87	3.62	-4.27	0.0131	5.36e-05	Moderately soluble	-4.65	0.00545	2.23e-05	Moderately soluble	-5.01	0.00239	9.79e-06	Moderately soluble	High	Yes	No	No	No	No	No	No	-4.84	0	0	0	0	0	0.56	0	0	2	2.45
DBB18448	COC(=O)c1cc2c(cc1OC)[nH]c1c2cccc1	C15H13NO3	255.27	19	13	0.13	3	3	1	73.58	51.32	2.32	3.21	3.12	2.23	3.45	2.87	-3.75	0.0451	0.000176	Soluble	-3.96	0.028	0.00011	Soluble	-5.17	0.00174	6.81e-06	Moderately soluble	High	Yes	No	Yes	Yes	No	Yes	No	-5.58	0	0	0	0	0	0.55	0	0	0	1.84
DBB18508	Oc1ccc(cc1)CCNC(=O)c1ccccc1	C15H15NO2	241.29	18	12	0.13	5	2	2	70.76	49.33	2.19	2.8	2.36	2.65	2.84	2.57	-3.26	0.132	0.000545	Soluble	-3.49	0.0776	0.000322	Soluble	-5.16	0.00168	6.98e-06	Moderately soluble	High	Yes	No	Yes	No	No	Yes	No	-5.78	0	0	0	0	0	0.55	0	0	1	1.32
DBB18566	OC(=O)[C@@H](NC(=O)[C@@H](N)C)Cc1cc2c([nH]1)cccc2	C14H17N3O3	275.3	20	9	0.29	6	4	4	74.78	108.21	1.02	-1.5	0.63	0.05	1.26	0.29	-0.54	79.6	0.289	Very soluble	-0.27	149	0.541	Very soluble	-3.19	0.179	0.00065	Soluble	High	No	No	No	No	No	No	No	-9.04	0	0	0	0	0	0.55	0	0	0	2.79
DBB18573	OC(=O)[C@H](Cc1ccccc1)NC(=O)[C@@H]1CCCN1	C14H18N2O3	262.3	19	6	0.43	6	4	3	74.43	78.43	2.07	-2.07	0.17	0.76	1.36	0.46	0	262	1	Highly soluble	0.95	2340	8.91	Highly soluble	-3.16	0.182	0.000695	Soluble	High	No	No	No	No	No	No	No	-9.37	0	0	0	0	1	0.55	0	0	0	2.58
DBB18574	N=C([C@H](N1CCC[C@@H]1C(=O)O)O)Cc1ccccc1	C14H18N2O3	262.3	19	6	0.43	5	5	3	76.28	84.62	0.8	-1.02	0.74	0.76	1.21	0.5	-0.73	49.1	0.187	Very soluble	-0.27	141	0.537	Very soluble	-1.96	2.88	0.011	Soluble	High	No	No	No	No	No	No	No	-8.62	0	0	0	0	0	0.55	0	1	0	2.95
DBB18622	NC1=NC(=O)C2=N[C@@H](CNC2=N1)CNc1ccc(cc1)C(=O)O	C14H14N6O3	314.3	23	6	0.21	4	6	4	97.98	141.53	0.97	-0.34	-2.25	-1.61	1.13	-0.42	-1.5	9.86	0.0314	Very soluble	-2.17	2.12	0.00675	Soluble	-3.32	0.15	0.000478	Soluble	Low	No	No	No	No	No	No	No	-8.46	0	1	1	1	0	0.55	0	0	0	4.01
DBB18650	OCc1ccc2c(c1)c1cccc(c1[nH]2)OC	C14H13NO2	227.26	17	13	0.14	2	2	2	68.42	45.25	2.31	2.47	2.67	1.83	3.41	2.54	-3.24	0.131	0.000577	Soluble	-3.06	0.196	0.000862	Soluble	-4.92	0.00271	1.19e-05	Moderately soluble	High	Yes	Yes	Yes	No	No	Yes	Yes	-5.93	0	0	0	0	0	0.55	0	0	1	1.7
DBB18686	CCCC(=O)OC(Cc1ccccc1)(C)C	C14H20O2	220.31	16	6	0.5	6	2	0	66.38	26.3	3.09	3.52	3.35	3.39	3.58	3.39	-3.31	0.109	0.000495	Soluble	-3.76	0.0386	0.000175	Soluble	-4.52	0.00668	3.03e-05	Moderately soluble	High	Yes	No	No	No	No	Yes	No	-5.14	0	0	0	0	0	0.55	0	0	2	1.92
DBB18711	OC[C@H]1O[C@H](C[C@H]1O)n1cc(C)c(=O)[nH]c1=O	C10H14N2O5	242.23	17	6	0.6	2	5	3	58.07	104.55	1.27	-1.17	-1.84	-1.15	-0.04	-0.58	-0.73	44.7	0.185	Very soluble	-0.53	71.1	0.293	Very soluble	-0.45	86.3	0.356	Soluble	High	No	No	No	No	No	No	No	-8.61	0	1	0	0	0	0.55	0	0	1	3.64
DBB18741	N[C@@H](C(O)O)/C=C/C(=O)N[C@H](c1ccccc1)CC(=O)O	C14H18N2O5	294.3	21	6	0.29	8	6	5	74.39	132.88	1.18	-3.57	-0.81	-0.14	-0.11	-0.69	0.9	2340	7.96	Highly soluble	1.36	6790	23.1	Highly soluble	-0.9	37.5	0.127	Soluble	High	No	No	No	No	No	No	No	-10.63	0	1	0	1	1	0.55	0	2	1	3.13
DBB18790	OC[C@@H]1O[C@@H]([C@@H]([C@@H]1O)O)n1c(=O)[nH]c(=O)cc1C(=O)O	C10H12N2O8	288.21	20	6	0.5	3	8	5	61.23	162.08	0.3	-2.57	-3.48	-2.08	-1.95	-1.96	-0.03	268	0.929	Very soluble	-0.29	148	0.515	Very soluble	1.38	6950	24.1	Soluble	Low	No	No	No	No	No	No	No	-9.88	0	1	1	1	2	0.11	0	0	0	3.93
DBB18939	O=C1CC[C@@H](O1)Cc1cccc(c1)O	C11H12O3	192.21	14	6	0.36	2	3	1	51.83	46.53	1.53	1.85	1.64	1.57	2.31	1.78	-2.38	0.797	0.00415	Soluble	-2.45	0.685	0.00356	Soluble	-2.74	0.351	0.00183	Soluble	High	Yes	No	No	No	No	No	No	-6.16	0	0	0	0	1	0.55	0	0	1	2.22
DBB18947	OC[C@@H]1O[C@H](C[C@H]1O)n1cc(C)c(nc1=O)N	C10H15N3O4	241.24	17	6	0.6	2	5	3	59.65	110.6	0.73	-1.4	-1.54	-1.2	-0.9	-0.86	-0.58	63	0.261	Very soluble	-0.42	91.5	0.379	Very soluble	-0.18	159	0.658	Soluble	High	No	No	No	No	No	No	No	-8.77	0	1	0	0	0	0.55	0	0	1	3.67
DBB18948	OC[C@@H]1O[C@@H](C[C@H]1O)n1cc(C)c(=O)[nH]c1=O	C10H14N2O5	242.23	17	6	0.6	2	5	3	58.07	104.55	1.25	-1.17	-1.84	-1.15	-0.04	-0.59	-0.73	44.7	0.185	Very soluble	-0.53	71.1	0.293	Very soluble	-0.45	86.3	0.356	Soluble	High	No	No	No	No	No	No	No	-8.61	0	1	0	0	0	0.55	0	0	1	3.64
DBB18949	OC[C@H]1O[C@H](C[C@H]1O)n1ccc(nc1=O)N	C9H13N3O4	227.22	16	6	0.56	2	5	3	54.69	110.6	0.83	-1.77	-1.85	-1.1	-1.37	-1.05	-0.28	119	0.526	Very soluble	-0.04	209	0.918	Very soluble	0.2	363	1.6	Soluble	High	No	No	No	No	No	No	No	-8.94	0	1	0	0	0	0.55	0	0	1	3.53
DBB18950	OC[C@@H]1O[C@H](C[C@@H]1O)n1ccc(=O)[nH]c1=O	C9H12N2O5	228.2	16	6	0.56	2	5	3	53.11	104.55	0.82	-1.62	-2.15	-1.04	-0.5	-0.9	-0.38	95.2	0.417	Very soluble	-0.07	196	0.86	Very soluble	-0.06	198	0.867	Soluble	High	No	No	No	No	No	No	No	-8.84	0	1	0	0	0	0.55	0	0	1	3.45
DBB18961	OC[C@H]1O[C@H]([C@H]([C@H]1O)O)n1ccc(nc1=O)NC(=O)C	C11H15N3O6	285.25	20	6	0.55	4	7	4	65.76	133.91	0.21	-1.35	-2.7	-1.75	-1.94	-1.51	-0.72	54.8	0.192	Very soluble	-0.96	31.1	0.109	Very soluble	0.28	537	1.88	Soluble	Low	No	No	No	No	No	No	No	-9	0	1	0	1	0	0.55	0	0	0	3.95
DBB19150	CCCC[C@H]1OC(=O)c2c1cccc2	C12H14O2	190.24	14	6	0.42	3	2	0	54.99	26.3	2.53	2.8	2.76	2.73	3.23	2.81	-2.9	0.238	0.00125	Soluble	-3.01	0.186	0.000979	Soluble	-3.95	0.0213	0.000112	Soluble	High	Yes	No	Yes	No	No	No	No	-5.47	0	0	0	0	1	0.55	0	0	1	2.51
DBB19348	O=C(C(C)C)OCc1ccc2c(c1)OCO2	C12H14O4	222.24	16	6	0.42	4	4	0	57.98	44.76	2.87	2.67	1.96	1.68	2.6	2.36	-2.91	0.271	0.00122	Soluble	-3.26	0.122	0.000547	Soluble	-3.08	0.187	0.000841	Soluble	High	Yes	No	Yes	Yes	No	No	No	-5.76	0	0	0	0	0	0.55	0	0	1	2.37
DBB194	CCCCCc1cc2OC(C)(C)[C@@H]3[C@@H](c2c(c1C(=O)O)O)C=C(CC3)C	C22H30O4	358.47	26	6	0.59	5	4	2	104.87	66.76	3.53	7.05	5.43	3.88	4.88	4.95	-6.34	0.000162	4.52e-07	Poorly soluble	-8.27	1.93e-06	5.38e-09	Poorly soluble	-5.28	0.00189	5.28e-06	Moderately soluble	High	No	No	No	No	Yes	No	Yes	-3.48	0	0	0	0	1	0.56	0	1	2	4.43
DBB19465	CCC(=O)c1ccc[nH]1	C7H9NO	123.15	9	5	0.29	2	1	1	35.79	32.86	1.33	1.2	1.61	0.17	2.01	1.26	-1.64	2.83	0.023	Very soluble	-1.49	4.02	0.0326	Very soluble	-2.3	0.613	0.00498	Soluble	High	Yes	No	No	No	No	No	No	-6.2	0	3	0	0	1	0.55	0	0	1	1.3
DBB19606	O=C(Cc1ccccc1)NC(=O)N	C9H10N2O2	178.19	13	6	0.11	4	2	2	47.32	72.19	0.94	0.87	0.42	0.98	0.41	0.73	-1.57	4.79	0.0269	Very soluble	-1.97	1.91	0.0107	Very soluble	-2.39	0.726	0.00407	Soluble	High	No	No	No	No	No	No	No	-6.77	0	0	0	0	1	0.55	0	0	1	1.19
DBB19618	O=C(C[C@H](C(=O)O)N)N[C@H](C(=O)O)Cc1ccccc1	C13H16N2O5	280.28	20	6	0.31	8	6	4	69.5	129.72	0.38	-2.73	-0.4	-2.21	-0.01	-0.99	0.45	787	2.81	Highly soluble	0.56	1010	3.61	Highly soluble	-1.69	5.72	0.0204	Soluble	High	No	No	No	Yes	No	No	No	-9.95	0	0	0	0	1	0.56	0	0	1	2.66
DBB19621	CNC(=O)CCc1c[nH]c2c1cccc2	C12H14N2O	202.25	15	9	0.25	4	1	2	60.69	44.89	1.78	1.5	1.85	1.28	2.74	1.83	-2.22	1.22	0.00604	Soluble	-2.05	1.8	0.0089	Soluble	-4.49	0.00661	3.27e-05	Moderately soluble	High	Yes	No	Yes	No	No	No	No	-6.47	0	0	0	0	0	0.55	0	0	1	1.56
DBB19651	OC(=O)CNC(=O)c1cccc(c1)C	C10H11NO3	193.2	14	6	0.2	4	3	2	50.98	66.4	1.32	1.59	0.81	1.14	1.15	1.2	-2.09	1.56	0.00808	Soluble	-2.6	0.49	0.00254	Soluble	-2.57	0.524	0.00271	Soluble	High	No	No	No	No	No	No	No	-6.35	0	0	0	0	1	0.56	0	0	1	1.23
DBB19680	CC(=O)NCCc1cnc[nH]1	C7H11N3O	153.18	11	5	0.43	4	2	2	40.98	57.78	0.76	-0.33	0.09	-0.75	1.07	0.17	-0.65	34	0.222	Very soluble	-0.42	58	0.378	Very soluble	-2.42	0.588	0.00384	Soluble	High	No	No	No	No	No	No	No	-7.47	0	1	0	0	1	0.55	0	0	1	1.66
DBB19690	O=C(Cc1ccccc1)N[C@@H](C(=O)O)CC(=O)O	C12H13NO5	251.24	18	6	0.25	7	5	3	61.99	103.7	0.74	0.26	0.27	0.53	0.59	0.48	-1.35	11.3	0.0451	Very soluble	-2	2.52	0.01	Very soluble	-2.01	2.46	0.00979	Soluble	High	No	No	No	No	No	No	No	-7.65	0	0	0	0	0	0.56	0	0	0	2.32
DBB19698	OC([C@H](NC(=O)Cc1ccccc1)/C=C/C(=O)N)O	C13H16N2O4	264.28	19	6	0.23	7	4	4	68.01	112.65	0.84	-0.86	-0.93	-0.01	0.24	-0.14	-0.71	51.7	0.196	Very soluble	-1.02	25	0.0945	Very soluble	-1.43	9.77	0.037	Soluble	High	No	No	No	No	No	No	No	-8.52	0	1	0	0	0	0.55	0	2	0	2.84
DBB19715	NCCC(=O)N[C@@H](C(=O)O)Cc1[nH]cnc1	C9H14N4O3	226.23	16	5	0.44	7	5	4	55.07	121.1	0.29	-3.99	-1.13	-1.81	-0.21	-1.37	1.5	7180	31.8	Highly soluble	2.05	25200	111	Highly soluble	-1.52	6.82	0.0301	Soluble	High	No	No	No	No	No	No	No	-10.51	0	1	0	0	1	0.55	0	0	1	2.63
DBB19716	OC(=O)[C@@H](Cc1ccccc1)NC(=O)C	C11H13NO3	207.23	15	6	0.27	5	3	2	55.41	66.4	1.23	0.93	0.82	1.17	1.22	1.07	-1.68	4.36	0.0211	Very soluble	-1.91	2.55	0.0123	Very soluble	-2.62	0.499	0.00241	Soluble	High	No	No	No	No	No	No	No	-6.9	0	0	0	0	0	0.56	0	0	1	1.81
DBB19719	NCCCC(=O)N[C@@H](C(=O)O)Cc1cnc[nH]1	C10H16N4O3	240.26	17	5	0.5	8	5	4	59.88	121.1	0	-3.63	-0.74	-1.51	0.16	-1.14	1.27	4450	18.5	Highly soluble	1.67	11300	47	Highly soluble	-1.93	2.86	0.0119	Soluble	High	No	No	No	No	No	No	No	-10.34	0	1	0	0	1	0.55	0	0	2	2.7
DBB19720	Cn1cc(nc1)C[C@@H](C(=O)O)NC(=O)CCN	C10H16N4O3	240.26	17	5	0.5	7	5	3	59.97	110.24	0.83	-4.03	-1.12	-1.51	-0.75	-1.32	1.45	6830	28.4	Highly soluble	2.32	49700	207	Highly soluble	-1.08	19.9	0.0828	Soluble	High	No	No	No	No	No	No	No	-10.63	0	1	0	0	1	0.55	0	0	1	2.81
DBB19731	O=C(N[C@H](C(=O)O)Cc1cnc[nH]1)CCNC(=O)C	C11H16N4O4	268.27	19	5	0.45	9	5	4	64.98	124.18	0.55	-1.45	-0.95	-1.69	0.19	-0.67	-0.19	173	0.645	Very soluble	-0.65	59.5	0.222	Very soluble	-2.26	1.47	0.00547	Soluble	High	No	No	No	Yes	No	No	No	-8.97	0	1	0	0	0	0.55	0	0	1	2.83
DBB19732	NCCC(=O)N[C@@H](C(=O)O)Cc1[nH]cnc1	C9H14N4O3	226.23	16	5	0.44	7	5	4	55.07	121.1	0.29	-3.99	-1.13	-1.81	-0.21	-1.37	1.5	7180	31.8	Highly soluble	2.05	25200	111	Highly soluble	-1.52	6.82	0.0301	Soluble	High	No	No	No	No	No	No	No	-10.51	0	1	0	0	1	0.55	0	0	1	2.63
DBB19733	OC(=O)[C@@H](Cc1ccccc1)NC(=O)CC(=O)O	C12H13NO5	251.24	18	6	0.25	7	5	3	61.99	103.7	0.58	0.63	0.27	0.53	0.59	0.52	-1.58	6.62	0.0263	Very soluble	-2.38	1.04	0.00414	Soluble	-2.01	2.46	0.00979	Soluble	High	No	No	No	No	No	No	No	-7.39	0	0	0	0	0	0.56	0	1	0	2.15
DBB19734	N[C@@H](C(O)O)/C=C/C(=O)N[C@@H](C(=O)O)Cc1ccccc1	C14H18N2O5	294.3	21	6	0.29	8	6	5	74.39	132.88	0.86	-3.2	-1.01	-0.14	-0.11	-0.72	0.67	1370	4.65	Highly soluble	0.98	2800	9.53	Highly soluble	-0.9	37.5	0.127	Soluble	Low	No	No	No	No	No	No	No	-10.37	0	1	0	1	1	0.55	0	2	1	3.21
DBB19735	CC(=O)N[C@@H](C(=O)O)Cc1cnc[nH]1	C8H11N3O3	197.19	14	5	0.38	5	4	3	47.56	95.08	0.04	-0.7	-0.46	-1.33	0.24	-0.44	-0.56	54.8	0.278	Very soluble	-0.82	29.7	0.151	Very soluble	-1.45	6.93	0.0352	Soluble	High	No	No	No	No	No	No	No	-8	0	1	0	0	1	0.55	0	0	1	2.4
DBB19736	NCCC(=O)N[C@@H](C(=O)O)Cc1[nH]cnc1	C9H14N4O3	226.23	16	5	0.44	7	5	4	55.07	121.1	0.29	-3.99	-1.13	-1.81	-0.21	-1.37	1.5	7180	31.8	Highly soluble	2.05	25200	111	Highly soluble	-1.52	6.82	0.0301	Soluble	High	No	No	No	No	No	No	No	-10.51	0	1	0	0	1	0.55	0	0	1	2.63
DBB19769	C[C@H](C(=O)Cc1ccccc1)O	C10H12O2	164.2	12	6	0.3	3	2	1	47.19	37.3	1.73	1.29	1.18	1.47	2.06	1.55	-1.84	2.36	0.0144	Very soluble	-1.67	3.49	0.0212	Very soluble	-2.6	0.411	0.0025	Soluble	High	Yes	No	No	No	No	No	No	-6.39	0	0	0	0	1	0.55	0	0	1	1.58
DBB19858	C[C@H](c1ccccc1)CC(=O)O	C10H12O2	164.2	12	6	0.3	3	2	1	47.6	37.3	1.62	2.18	2.26	2.29	2.06	2.08	-2.4	0.649	0.00395	Soluble	-2.6	0.416	0.00253	Soluble	-2.6	0.411	0.0025	Soluble	High	Yes	No	No	No	No	No	No	-5.75	0	0	0	0	1	0.56	0	0	1	1.39
DBB20185	N[C@H](C(O)O)/C=C/C(=O)N[C@@H](C(=O)O)Cc1ccccc1	C14H18N2O5	294.3	21	6	0.29	8	6	5	74.39	132.88	0.94	-3.2	-1.01	-0.14	-0.11	-0.7	0.67	1370	4.65	Highly soluble	0.98	2800	9.53	Highly soluble	-0.9	37.5	0.127	Soluble	Low	No	No	No	No	No	No	No	-10.37	0	1	0	1	1	0.55	0	2	1	3.21
DBB20248	OC(=O)c1cc2c([nH]1)cccc2	C9H7NO2	161.16	12	9	0	1	2	2	45.26	53.09	1.08	2.31	1.87	1.08	1.89	1.64	-2.78	0.265	0.00165	Soluble	-3.06	0.139	0.000865	Soluble	-2.65	0.364	0.00226	Soluble	High	Yes	No	Yes	No	No	No	No	-5.64	0	1	0	0	1	0.56	0	0	1	1.23
DBB20374	OC(=O)c1cc(O)c2c(n1)cccc2	C10H7NO3	189.17	14	10	0	1	4	2	50.73	70.42	1.07	1.69	1.64	-0.35	1.31	1.07	-2.54	0.545	0.00288	Soluble	-2.78	0.311	0.00165	Soluble	-2.5	0.597	0.00316	Soluble	High	Yes	No	No	No	No	No	No	-6.25	0	0	0	0	1	0.56	0	0	1	1.49
DBB20523	O=C1N=C(Cc2cnc[nH]2)[C@@H](N2[C@H]1CCCC2)O	C12H16N4O2	248.28	18	5	0.58	2	5	2	72.97	81.58	0.98	-0.13	-0.66	-0.14	1.32	0.28	-1.37	10.6	0.0426	Very soluble	-1.13	18.4	0.0742	Very soluble	-2.09	2.04	0.0082	Soluble	High	No	No	No	No	No	No	No	-7.91	0	1	0	0	0	0.55	0	0	1	4.23
DBB20576	O=C1NC(=O)N=C(C1)C(=O)O	C5H4N2O4	156.1	11	0	0.2	1	5	2	40.32	95.83	-0.44	-0.96	-1.61	-1.14	0.13	-0.8	-0.14	114	0.729	Very soluble	-0.57	42.3	0.271	Very soluble	-0.21	95.8	0.614	Soluble	High	No	No	No	No	No	No	No	-7.93	0	3	0	0	1	0.56	0	0	1	2.7
DBB20616	OC([C@H](NC(=O)c1ccc([nH]1)O)CCC(=O)N)O	C10H15N3O5	257.24	18	5	0.4	7	5	6	60.27	148.67	-0.26	-1.63	-1.61	-1.76	-0.88	-1.23	-0.15	181	0.705	Very soluble	-0.98	26.8	0.104	Very soluble	-0.38	106	0.413	Soluble	Low	No	No	No	No	No	No	No	-9.03	1	1	1	1	1	0.55	0	1	0	2.52
DBB21123	CO[C@H](CC1=c2ccccc2=NC1=O)O	C11H11NO3	205.21	15	6	0.27	3	4	1	56.69	58.89	1.76	0.51	-1.03	0.69	2.36	0.86	-1.53	6.03	0.0294	Very soluble	-1.32	9.89	0.0482	Very soluble	-2.88	0.269	0.00131	Soluble	High	No	No	No	No	No	No	No	-7.19	0	1	0	0	0	0.55	0	1	1	3.76
DBB21709	OC(=O)CNC(=O)c1cccc(c1)O	C9H9NO4	195.17	14	6	0.11	4	4	3	48.04	86.63	0.87	-0.05	0.21	0.28	0.2	0.3	-1.07	16.5	0.0848	Very soluble	-1.32	9.37	0.048	Very soluble	-1.6	4.85	0.0248	Soluble	High	No	No	No	No	No	No	No	-7.53	0	0	0	0	1	0.56	0	0	1	1.18
DBB21712	OC(=O)C[C@@H](c1cccc(c1)O)O	C9H10O4	182.17	13	6	0.22	3	4	3	45.98	77.76	0.95	-0.38	0.58	0.52	0.63	0.46	-0.87	24.4	0.134	Very soluble	-0.79	29.6	0.162	Very soluble	-1.07	15.4	0.0843	Soluble	High	No	No	No	No	No	No	No	-7.68	0	0	0	0	1	0.56	0	0	1	1.82
DBB21720	OC(=O)C[C@@H](c1cccc(c1)O)O	C9H10O4	182.17	13	6	0.22	3	4	3	45.98	77.76	0.95	-0.38	0.58	0.52	0.63	0.46	-0.87	24.4	0.134	Very soluble	-0.79	29.6	0.162	Very soluble	-1.07	15.4	0.0843	Soluble	High	No	No	No	No	No	No	No	-7.68	0	0	0	0	1	0.56	0	0	1	1.82
DBB21778	OC(=O)c1cc(O)c2c(n1)c(O)ccc2	C10H7NO4	205.17	15	10	0	1	5	3	52.75	90.65	0.88	1.34	1.34	-0.91	0.83	0.7	-2.38	0.848	0.00413	Soluble	-2.85	0.293	0.00143	Soluble	-1.93	2.41	0.0117	Soluble	High	No	No	No	No	No	No	No	-6.6	0	0	0	0	0	0.56	0	0	1	1.71
DBB21790	COC(=O)c1cc2c(cc1O)[nH]c1c2cccc1	C14H11NO3	241.24	18	13	0.07	2	3	2	69.11	62.32	2.24	3.44	2.81	1.98	2.94	2.68	-3.91	0.03	0.000124	Soluble	-4.43	0.00897	3.72e-05	Moderately soluble	-4.47	0.00823	3.41e-05	Moderately soluble	High	Yes	No	Yes	No	No	No	No	-5.33	0	0	0	0	0	0.55	0	0	1	1.7
DBB21795	NC(=O)Cc1c[nH]c2c1ccc(c2)O	C10H10N2O2	190.2	14	9	0.1	2	2	3	53	79.11	0.58	0.4	0.9	0.12	1.48	0.7	-1.61	4.62	0.0243	Very soluble	-1.63	4.48	0.0236	Very soluble	-2.71	0.375	0.00197	Soluble	High	No	No	No	No	No	No	No	-7.18	0	0	0	0	1	0.55	0	0	1	1.5
DBB21801	O=C(Cc1c[nH]c2c1cc(O)cc2)NCC(=O)O	C12H12N2O4	248.23	18	9	0.17	5	4	4	64.48	102.42	0.35	0.5	0.62	-0.21	1.21	0.49	-1.73	4.58	0.0184	Very soluble	-2.22	1.49	0.00601	Soluble	-2.9	0.314	0.00126	Soluble	High	No	No	No	No	No	No	No	-7.46	0	0	0	0	0	0.56	0	0	1	1.75
DBB21804	CC(=O)NCCc1c[nH]c2c1cc(O)cc2	C12H14N2O2	218.25	16	9	0.25	4	2	3	62.71	65.12	1.44	1.27	1.55	0.7	2.26	1.44	-2.15	1.56	0.00715	Soluble	-2.24	1.27	0.0058	Soluble	-3.91	0.0267	0.000122	Soluble	High	Yes	No	No	No	No	No	No	-6.73	0	0	0	0	0	0.55	0	0	1	1.58
DBB21815	COC(=O)c1cc(O)nc2c1cc(O)cc2	C11H9NO4	219.19	16	10	0.09	2	5	2	57.07	79.65	1.66	1.67	1.43	0.89	1.32	1.4	-2.58	0.574	0.00262	Soluble	-2.96	0.242	0.0011	Soluble	-2.63	0.508	0.00232	Soluble	High	No	No	No	No	No	No	No	-6.45	0	0	0	0	0	0.55	0	0	1	1.79
DBB21856	O=C(Cc1ccc(cc1)O)N[C@H](C(O)O)/C=C/C(=O)O	C13H15NO6	281.26	20	6	0.23	7	6	5	68.9	127.09	0.55	-0.57	-0.63	-0.13	0.03	-0.15	-0.98	29.1	0.104	Very soluble	-1.63	6.61	0.0235	Very soluble	-0.64	65	0.231	Soluble	High	No	No	No	No	No	No	No	-8.42	0	1	0	0	0	0.56	0	2	0	2.8
DBB21857	O=C(Cc1ccc(cc1)O)NCC(=O)O	C10H11NO4	209.2	15	6	0.2	5	4	3	52.63	86.63	0.79	0.37	0.14	0.31	0.56	0.43	-1.34	9.65	0.0461	Very soluble	-1.75	3.68	0.0176	Very soluble	-2.01	2.03	0.00971	Soluble	High	No	No	No	No	No	No	No	-7.31	0	0	0	0	0	0.56	0	0	1	1.34
DBB21882	OC(=O)[C@@H](Cc1ccc(cc1)O)NC(=O)C	C11H13NO4	223.23	16	6	0.27	5	4	3	57.43	86.63	0.76	1.32	0.52	0.6	0.76	0.79	-2	2.22	0.00993	Soluble	-2.74	0.406	0.00182	Soluble	-2.04	2.01	0.00902	Soluble	High	No	No	No	No	No	No	No	-6.72	0	0	0	0	0	0.56	0	0	1	1.87
DBB21918	CC(CC(=O)c1cc(ccc1O)C(=O)C)C	C13H16O3	220.26	16	6	0.38	4	3	1	63.28	54.37	2.33	2.75	2.82	1.62	3.01	2.51	-2.95	0.246	0.00112	Soluble	-3.55	0.0626	0.000284	Soluble	-3.34	0.1	0.000455	Soluble	High	Yes	No	Yes	No	No	No	No	-5.69	0	0	0	0	0	0.55	0	0	1	1.78
DBB21925	COC(=O)c1ccc(c(c1)C[C@H](C(O)(C)C)O)O	C13H18O5	254.28	18	6	0.46	5	5	3	66.3	86.99	2.29	1	0.85	1.11	1.51	1.35	-1.96	2.77	0.0109	Very soluble	-2.42	0.976	0.00384	Soluble	-2.03	2.37	0.00933	Soluble	High	No	No	No	No	No	No	No	-7.14	0	0	0	0	0	0.55	0	0	0	2.69
DBB2423	CCCCCCCCCCCCCCCCCC(=O)NCCc1c[nH]c2c1cccc2	C28H46N2O	426.68	31	9	0.68	20	1	2	137.6	44.89	5.4	9.37	8.09	4.94	9.21	7.4	-7.28	2.22e-05	5.21e-08	Poorly soluble	-10.22	2.59e-08	6.07e-11	Insoluble	-10.85	5.97e-09	1.4e-11	Insoluble	Low	No	Yes	Yes	Yes	No	No	Yes	-2.25	1	3	1	1	2	0.55	0	0	3	3.38
DBB2444	O=C(CNC(=O)[C@H](Cc1ccc(cc1)O)N)NCC(=O)N[C@@H](C(=O)N[C@@H](C(=O)O)CC(C)C)Cc1ccccc1	C28H37N5O7	555.62	40	12	0.39	19	8	7	146.51	199.95	1.84	-2.33	-0.16	-0.16	1.94	0.22	-0.78	91.2	0.164	Very soluble	-1.33	25.9	0.0465	Very soluble	-6.1	0.000437	7.87e-07	Poorly soluble	Low	No	Yes	No	No	No	No	No	-11.34	3	3	2	1	4	0.17	0	0	2	4.34
DBB2455	N=C([C@H](N1CCC[C@H]1C(=O)/N=C(/[C@@H](N1CCC[C@H]1C(=O)N)O)\Cc1ccccc1)O)Cc1ccc(cc1)O	C28H35N5O5	521.61	38	12	0.43	11	9	5	152.12	163.54	3.31	1.71	0.45	0.63	2.17	1.66	-3.66	0.114	0.000219	Soluble	-4.76	0.00906	1.74e-05	Moderately soluble	-4.05	0.0468	8.97e-05	Moderately soluble	Low	No	Yes	No	No	No	No	No	-8.27	1	3	2	1	1	0.55	0	1	2	5.36
DBB258	O=C1CCc2c(N1)cc(cc2)OCCCCN1CCN(CC1)c1cccc(c1Cl)Cl	C23H27Cl2N3O2	448.39	30	12	0.43	7	3	1	133.26	44.81	4.28	4.64	3.53	3.65	4.96	4.21	-5.38	0.00188	4.2e-06	Moderately soluble	-5.31	0.00221	4.93e-06	Moderately soluble	-7.93	5.21e-06	1.16e-08	Poorly soluble	High	Yes	Yes	No	Yes	No	Yes	No	-5.74	0	1	0	0	0	0.55	0	0	2	3.15
DBB2649	CSCC[C@@H](C(=O)N[C@@H](C(=O)N[C@@H](C(=O)N)C(C)C)Cc1ccccc1)N/C(=C/1\CCCN1[C@@H](/C(=N/C(=C/N)/O)/C)O)/O	C29H45N7O6S	619.78	43	6	0.52	18	7	8	170.91	240.93	3.25	1.69	0.59	-0.82	1.18	1.18	-3.66	0.135	0.000217	Soluble	-6.36	0.000268	4.32e-07	Poorly soluble	-3.4	0.245	0.000395	Soluble	Low	No	Yes	No	No	No	No	No	-8.88	3	3	2	1	4	0.17	0	2	2	6.33
DBB2650	CSCC[C@@H](C(=O)N[C@@H](C(=O)N[C@@H](C(=O)N)C(C)C)Cc1ccccc1)N/C(=C/1\CCCN1[C@H]([C@H](N/C(=C/N)/O)C=O)O)/O	C29H45N7O7S	635.78	44	6	0.52	20	7	9	170.23	257.67	2.97	1.38	-0.72	-1.97	0.1	0.35	-3.43	0.235	0.00037	Soluble	-6.39	0.000256	4.03e-07	Poorly soluble	-2.95	0.715	0.00112	Soluble	Low	No	No	No	No	No	No	No	-9.2	3	4	2	1	4	0.17	0	2	2	6.3
DBB2682	NC(=O)/C=C/[C@H]([C@H](N1CCC/C/1=C(\N[C@H](C(O)O)/C=C/C(=O)N)/O)O)NC(=O)[C@@H]1CCCN1[C@@H](C(=N)Cc1ccc(cc1)O)O	C29H41N7O9	631.68	45	6	0.45	16	11	11	168.58	279.02	1.67	-2.02	-3.05	-2.84	-1.76	-1.6	-1.53	18.8	0.0298	Very soluble	-3.31	0.306	0.000485	Soluble	0.55	2260	3.58	Soluble	Low	No	No	No	No	No	No	No	-11.59	3	4	2	1	6	0.17	0	4	2	6.3
DBB2790	CSCC[C@@H](C(=O)/N=C(/C(=O)N[C@@H](C(=O)N)Cc1ccccc1)\CC(O)O)N/C(=C(/Cc1c[nH]c2c1cccc2)\N)/O	C29H36N6O6S	596.7	42	15	0.31	17	7	8	161.37	241.45	2.3	1.71	0.99	-0.5	2.6	1.42	-3.76	0.104	0.000174	Soluble	-6.4	0.00024	4.02e-07	Poorly soluble	-5.86	0.000824	1.38e-06	Moderately soluble	Low	No	Yes	No	No	No	No	No	-8.73	3	3	2	1	3	0.17	0	3	2	5.61
DBB287	COc1cc2c(cc1OC)OC[C@@H]1[C@H]2C(=O)c2c(O1)c1C[C@@H](Oc1cc2)C(=C)C	C23H22O6	394.42	29	12	0.35	3	6	0	106.15	63.22	3.83	4.1	3.7	1.93	4.39	3.59	-4.98	0.00416	1.06e-05	Moderately soluble	-5.13	0.0029	7.36e-06	Moderately soluble	-6	0.000393	9.95e-07	Poorly soluble	High	Yes	No	No	Yes	Yes	Yes	Yes	-5.79	0	0	0	0	0	0.55	0	1	2	4.52
DBB3381	CCCCCCCCCCCCCCCCCCCC(=O)NCCc1c[nH]c2c1cccc2	C30H50N2O	454.73	33	9	0.7	22	1	2	147.21	44.89	5.95	10.45	8.87	5.33	10.07	8.13	-7.99	4.62e-06	1.02e-08	Poorly soluble	-11.34	2.09e-09	4.59e-12	Insoluble	-11.64	1.05e-09	2.31e-12	Insoluble	Low	No	Yes	No	Yes	No	No	Yes	-1.65	1	3	1	1	2	0.55	0	0	3	3.63
DBB3508	OC(/C=C/C(=O)N[C@@H](C(=O)/N=C(/[C@@H](N1CCC[C@@H]1C(=O)/N=C(/[C@@H](SCc1ccccc1)O)\Cc1ccccc1)O)\C)C)O	C31H38N4O7S	610.72	43	12	0.39	16	10	5	169.65	197.42	3.6	1.84	1.06	0.85	3.83	2.23	-3.94	0.0707	0.000116	Soluble	-5.61	0.00151	2.48e-06	Moderately soluble	-4.58	0.0162	2.65e-05	Moderately soluble	Low	No	Yes	No	No	No	No	No	-8.72	2	3	2	1	3	0.17	0	3	2	6.01
DBB3532	CN[C@H](C(=O)/N=C/1\[C@H](O)N[C@@H](Cc2c[nH]c3c2cccc3)C(=O)NCCc2ccc(O[C@@H]1C(C)C)cc2)C(=C)C	C31H39N5O4	545.67	40	15	0.39	7	7	5	165.24	127.84	3.14	4.78	2.13	1.7	4.56	3.26	-6.05	0.000486	8.91e-07	Poorly soluble	-7.2	3.47e-05	6.37e-08	Poorly soluble	-8.51	1.68e-06	3.08e-09	Poorly soluble	High	No	Yes	No	No	No	No	Yes	-6.23	1	3	0	0	0	0.55	0	2	2	6.85
DBB3724	CCCCCCCCCCCCCCCCCCCCCC(=O)NCCc1c[nH]c2c1cccc2	C32H54N2O	482.78	35	9	0.72	24	1	2	156.83	44.89	6.45	11.53	9.65	5.71	10.92	8.85	-8.7	9.56e-07	1.98e-09	Poorly soluble	-12.46	1.68e-10	3.48e-13	Insoluble	-12.42	1.85e-10	3.84e-13	Insoluble	Low	No	Yes	No	Yes	No	No	No	-1.06	1	4	1	1	2	0.55	0	0	3	3.88
DBB3757	O=C([C@H](Cc1ccccc1)NC(=O)[C@H]1CCCN1[C@@H](C(=N)Cc1ccc(cc1)O)O)N[C@H](C(=O)N)Cc1ccccc1	C32H37N5O5	571.67	42	18	0.31	15	7	6	163.26	168.84	2.14	2.93	1.3	0.78	3.13	2.05	-4.56	0.0158	2.77e-05	Moderately soluble	-6.14	0.000417	7.29e-07	Poorly soluble	-7.28	3.03e-05	5.31e-08	Poorly soluble	Low	No	Yes	No	No	No	No	No	-7.71	2	3	2	1	2	0.17	0	1	2	4.9
DBB3940	CCCCCCCCCCCCCCCCCCCCCCC(=O)NCCc1c[nH]c2c1cccc2	C33H56N2O	496.81	36	9	0.73	25	1	2	161.63	44.89	6.59	12.07	10.04	5.89	11.35	9.19	-9.06	4.33e-07	8.72e-10	Poorly soluble	-13.02	4.76e-11	9.57e-14	Insoluble	-12.8	7.78e-11	1.57e-13	Insoluble	Low	No	Yes	No	Yes	No	No	No	-0.76	1	4	1	1	2	0.55	0	0	3	4
DBB4100	CCCCCCCCCCCCCCCCCCCCCCCC(=O)NCCc1c[nH]c2c1cccc2	C34H58N2O	510.84	37	9	0.74	26	1	2	166.44	44.89	6.88	12.62	10.43	6.07	11.78	9.56	-9.42	1.93e-07	3.79e-10	Poorly soluble	-13.59	1.31e-11	2.57e-14	Insoluble	-13.19	3.27e-11	6.4e-14	Insoluble	Low	No	Yes	No	No	No	No	No	-0.46	2	4	1	1	2	0.17	0	0	3	4.13
DBB4117	O=C([C@@H](Cc1c[nH]c2c1cccc2)NC(=O)[C@@H]1CCCN1[C@@H](C(=N)Cc1ccc(cc1)O)O)N[C@H](C(=O)N)Cc1ccccc1	C34H38N6O5	610.7	45	21	0.29	15	7	7	175.11	184.63	1.86	3.06	1.78	0.51	3.67	2.18	-4.91	0.00752	1.23e-05	Moderately soluble	-6.6	0.000152	2.49e-07	Poorly soluble	-8.11	4.75e-06	7.78e-09	Poorly soluble	Low	No	No	No	No	No	No	No	-7.85	3	3	2	1	3	0.17	0	1	2	5.16
DBB414	CCCCCCCCCCCCCCCC(=O)NCc1ccccc1	C23H39NO	345.56	25	6	0.7	17	1	1	111.32	29.1	4.99	8.36	6.63	5.09	7.31	6.48	-6.3	0.000171	4.96e-07	Poorly soluble	-8.84	5.02e-07	1.45e-09	Poorly soluble	-8.82	5.23e-07	1.51e-09	Poorly soluble	Low	No	No	Yes	Yes	No	Yes	Yes	-2.47	1	1	1	1	2	0.55	0	0	2	2.38
DBB4197	CC(C[C@@H]1NC(=O)[C@H](NC(=O)[C@H](C)NC(=O)/C(=N/C(=C/2\N(C(=O)[C@H](NC(=O)CNC1=O)[C@@H](O)C)CCC2)/O)/C[C@H](O)N)Cc1c[nH]c2c1cccc2)C	C35H49N9O9	739.82	53	9	0.51	7	11	10	218.75	280.67	-0.18	-0.51	-3.98	-2.58	0.07	-1.44	-3.77	0.126	0.00017	Soluble	-4.92	0.00898	1.21e-05	Moderately soluble	-6.34	0.000335	4.53e-07	Poorly soluble	Low	No	Yes	No	No	No	No	No	-11.17	3	4	1	1	4	0.17	0	1	1	7.48
DBB4298	CCCCCCCCCCCCCCCCCCCCCCCCC(=O)NCCc1c[nH]c2c1cccc2	C35H60N2O	524.86	38	9	0.74	27	1	2	171.25	44.89	7.17	13.16	10.82	6.26	12.21	9.92	-9.78	8.75e-08	1.67e-10	Poorly soluble	-14.15	3.72e-12	7.08e-15	Insoluble	-13.58	1.37e-11	2.62e-14	Insoluble	Low	No	Yes	No	No	No	No	No	-0.16	2	4	1	1	2	0.17	0	0	3	4.25
DBB4378	NC(=N)NCCC[C@@H](C(=O)/N=C(/[C@@H](N1CCC[C@H]1C(=O)N[C@@H](C(=O)N[C@H](C(=O)O)Cc1ccccc1)Cc1ccc(cc1)O)O)\Cc1nc[nH]c1)N	C35H46N10O7	718.8	52	17	0.4	22	12	10	195.21	285.23	2.56	-1.88	-0.84	-1.14	1.64	0.07	-1.9	9.01	0.0125	Very soluble	-3.59	0.185	0.000257	Soluble	-6.33	0.000337	4.69e-07	Poorly soluble	Low	No	Yes	No	No	No	No	No	-12.02	3	4	2	1	5	0.17	0	2	2	6.58
DBB4438	Oc1ccc(cc1)C[C@H]1NC(=O)[C@@H](NC(=O)[C@@H](N/C(=C(/CC(C)C)\N/C(=C(/N/C(=C/2\N([C@@H](/C(=N/C(=O)CNC1=O)/C)O)CCC2)/O)\C)/O)/O)[C@H](O)C)[C@@H](O)C	C36H54N8O11	774.86	55	6	0.53	6	12	13	230.31	297.67	3.07	2.09	-3.46	-2.98	-1.51	-0.56	-5.65	0.00175	2.26e-06	Moderately soluble	-7.97	8.28e-06	1.07e-08	Poorly soluble	-4.6	0.0193	2.49e-05	Moderately soluble	Low	No	Yes	No	No	No	No	No	-9.54	3	4	1	1	4	0.17	0	0	1	7.94
DBB4527	CCCCCCCCCCCCCCCCCCCCCCCCCC(=O)NCCc1c[nH]c2c1cccc2	C36H62N2O	538.89	39	9	0.75	28	1	2	176.06	44.89	7.35	13.7	11.21	6.44	12.64	10.27	-10.13	3.95e-08	7.33e-11	Insoluble	-14.71	1.05e-12	1.95e-15	Insoluble	-13.97	5.77e-12	1.07e-14	Insoluble	Low	No	Yes	No	No	No	No	No	0.14	2	4	1	1	2	0.17	0	0	3	4.38
DBB4722	O=C1CNC(=O)[C@H](NC(=O)[C@H](Cc2ccccc2)NC(=O)[C@@H]2N([C@H](/C(=N/C(=C/3\N([C@H](/C=N/1)O)CCC3)/O)/C)O)CCC2)Cc1c[nH]c2c1cccc2	C37H44N8O7	712.79	52	15	0.41	4	10	7	219.18	212.05	3.3	1.46	-1.63	-0.17	1.32	0.86	-5.13	0.0053	7.44e-06	Moderately soluble	-5.52	0.00216	3.02e-06	Moderately soluble	-7.42	2.73e-05	3.83e-08	Poorly soluble	Low	No	Yes	No	No	No	No	No	-9.61	3	4	1	1	3	0.17	0	0	1	7.23
DBB5090	CSCC/C/1=C(\O)/N/C(=C(/O)\N[C@H](C)C(=O)N[C@H]([C@@H](CC)C)C(=O)N[C@H](C(=O)NCC(=O)/N=C(/[C@@H](N2/C(=C(\N1)/O)/CCC2)O)\Cc1ccc(cc1)O)C(C)C)/[C@@H](O)C	C39H60N8O10S	833.01	58	6	0.56	9	11	12	251.16	302.74	5.19	3.54	-1.46	-1.73	0.45	1.2	-6.72	0.00016	1.92e-07	Poorly soluble	-9.58	2.18e-07	2.62e-10	Poorly soluble	-6.39	0.000338	4.06e-07	Poorly soluble	Low	No	Yes	No	No	No	No	No	-8.87	3	4	1	1	4	0.17	0	0	3	8.4
DBB5126	Oc1ccc(cc1)C[C@@H]1NC(=O)[C@@H](NC(=O)[C@@H](NC(=O)[C@H](CC(C)C)NC(=O)/C(=N/C(=O)CNC(=O)[C@@H](NC1=O)Cc1ccccc1)/CC(O)O)C(C)C)[C@H](O)C	C39H53N7O11	795.88	57	12	0.49	10	12	10	232.98	284.95	2.67	1.59	-4.18	-1.94	1.61	-0.05	-5.27	0.00426	5.35e-06	Moderately soluble	-7.19	5.2e-05	6.53e-08	Poorly soluble	-8.08	6.56e-06	8.24e-09	Poorly soluble	Low	No	Yes	No	No	No	No	No	-10.03	3	4	1	1	4	0.17	0	1	2	7.58
DBB5373	N/C=C(\N/C(=C(/N/C(=C(/N/C(=C(\N[C@H](C(=O)N[C@H](C(=O)NCC(=O)N[C@H](C(=O)N)Cc1nc[nH]c1)C(C)C)C)/O)/Cc1c[nH]c2c1cccc2)\O)/Cc1nc[nH]c1)\O)/C=C(/O)\N)/O	C39H53N15O9	875.93	63	19	0.28	26	11	18	225.92	404.85	1.92	0.83	-0.53	-5.73	-1.86	-1.07	-4.3	0.0438	5e-05	Moderately soluble	-8.91	1.07e-06	1.22e-09	Poorly soluble	-4.9	0.0111	1.26e-05	Moderately soluble	Low	No	Yes	No	No	No	No	No	-11.05	3	4	2	1	5	0.17	0	2	2	7.3
DBB5448	CCCC/C=C/CCCCCCCCCCCCCCCCCCCCCCCC(=O)NCCc1c[nH]c2c1cccc2	C40H68N2O	592.98	43	9	0.72	31	1	2	194.81	44.89	8.18	14.93	12.55	7.05	14.2	11.38	-11.03	5.52e-09	9.31e-12	Insoluble	-15.99	6.11e-14	1.03e-16	Insoluble	-14.8	9.38e-13	1.58e-15	Insoluble	Low	No	Yes	No	No	No	No	No	0.68	2	4	1	1	2	0.17	0	1	3	5.01
DBB5554	CC[C@H]([C@H](C(=O)/N=C(/[C@H](N1CCC[C@H]1C(=O)N[C@@H](C(=O)O)Cc1ccccc1)O)\Cc1nc[nH]c1)NC(=O)[C@H](N/C(=C(/C(C)C)\N)/O)Cc1ccc(cc1)O)C	C40H54N8O8	774.91	56	17	0.45	22	11	9	214.04	255.59	2.87	1.77	1.91	-0.35	3.47	1.93	-4.53	0.0228	2.94e-05	Moderately soluble	-6.76	0.000136	1.76e-07	Poorly soluble	-6.86	0.000107	1.38e-07	Poorly soluble	Low	No	Yes	No	No	No	No	No	-9.77	3	3	2	1	5	0.17	0	2	2	7.42
DBB5697	CSCC[C@@H](C(=O)N)NC(=O)[C@H](Cc1ccccc1)NC(=O)[C@@H](Cc1c[nH]cn1)NC(=O)CNC(=O)[C@@H]([C@@H](O)C)NC(=O)[C@@H](NC(=O)[C@@H](Cc1c[nH]c2c1cccc2)N)C	C40H53N11O8S	847.98	60	20	0.4	29	10	11	222.52	333.71	2.85	-0.2	-1.57	-3.13	2.73	0.13	-3.3	0.421	0.000496	Soluble	-6.35	0.000377	4.45e-07	Poorly soluble	-9.18	5.64e-07	6.65e-10	Poorly soluble	Low	No	Yes	No	No	No	No	Yes	-11.61	3	4	2	1	4	0.17	0	0	2	6.97
DBB5698	CC[C@H](/C/1=C(\O)/N[C@H](CCC(=O)N)C(=O)/N=C(\C[C@H](O)N)/C(=O)/N=C(\CSS/C(=C(/N/C(=C(\N1)/O)/Cc1ccc(cc1)O)\O)/N)/[C@@H](N1CCC/C/1=C(\N[C@@H](C(=O)O)CC(C)C)/O)O)C	C40H60N10O12S2	937.09	64	6	0.5	16	15	15	264.01	434.86	1.62	-0.45	-0.58	-5.15	-0.47	-1.01	-4.38	0.0391	4.17e-05	Moderately soluble	-8.22	5.69e-06	6.08e-09	Poorly soluble	-3.78	0.156	0.000167	Soluble	Low	No	Yes	No	No	No	No	No	-12.34	3	4	2	1	5	0.17	0	3	2	9.02
DBB5793	OC(=O)CC[C@@H]1NC(=O)CNC(=O)[C@@H](NC(=O)[C@H](CCC(=O)O)NC(=O)[C@@H](N/C(=C(\N/C(=C/2\N([C@@H](/C(=N/C1=O)/C(C)C)O)CCC2)/O)/CCC(=O)O)/O)C)Cc1c[nH]c2c1cccc2	C41H55N9O14	897.93	64	9	0.49	12	15	13	256.66	361.51	1.32	0.29	-3.1	-2.86	-0.65	-1	-4.9	0.0113	1.25e-05	Moderately soluble	-7.44	3.23e-05	3.6e-08	Poorly soluble	-6.16	0.00062	6.9e-07	Poorly soluble	Low	No	Yes	No	No	No	No	No	-11.57	3	4	2	1	4	0.11	0	0	2	8.25
DBB604	CCN(CCOC(=O)[C@@H](Cc1cccc2c1cccc2)C[C@@H]1CCCO1)CC	C24H33NO3	383.52	28	10	0.54	11	4	0	114.56	38.77	4.17	4.83	4.45	3.38	5.29	4.42	-4.8	0.00609	1.59e-05	Moderately soluble	-5.38	0.00161	4.19e-06	Moderately soluble	-6.9	4.78e-05	1.25e-07	Poorly soluble	High	Yes	No	No	No	Yes	Yes	Yes	-5.21	0	0	1	0	0	0.55	0	0	3	3.91
DBB6260	OC[C@@H]1NC(=O)CNC(=O)[C@H](NC(=O)[C@@H](n2cc(C[C@H](NC1=O)C(=O)O)c1ccccc21)N/C(=C(/N/C(=C\1/CCCN1[C@@H](c1ccc([nH]1)O)O)/O)\Cc1ccc(cc1)O)/O)C(C)C	C42H51N9O12	873.91	63	20	0.36	11	12	14	243.43	323.1	2.65	2.48	-2.15	-2.6	-1.66	-0.26	-6.33	0.000409	4.68e-07	Poorly soluble	-8.91	1.08e-06	1.23e-09	Poorly soluble	-5.88	0.00115	1.32e-06	Moderately soluble	Low	No	Yes	No	No	No	No	No	-9.87	3	4	2	1	4	0.11	0	1	2	7.88
DBB6281	CC[C@@H]([C@@H]1N/C(=C(/CC(C)C)\N/C(=C(\N/C(=C\2/CCCN2[C@@H](O)/C(=N/C(=O)CNC(=O)[C@H](NC(=O)[C@@H](NC1=O)C)C)/CC(C)C)/O)/Cc1c[nH]c2c1cccc2)/O)/O)C	C42H63N9O8	822.01	59	9	0.55	8	9	11	257.05	252.77	5.16	5.26	0.64	-0.64	2.33	2.55	-7.84	1.2e-05	1.46e-08	Poorly soluble	-10.32	3.96e-08	4.81e-11	Insoluble	-8.72	1.56e-06	1.9e-09	Poorly soluble	Low	No	Yes	No	No	No	No	No	-7.58	3	3	1	1	4	0.17	0	0	3	8.4
DBB6621	CC[C@H]([C@@H]1N/C(=C(/Cc2ccc(cc2)O)\N/C(=C(\N)/CSSC/C(=N\C(=O)/C(=N/C(=O)[C@H](NC1=O)CCC(=O)N)/C[C@@H](O)N)/[C@@H](N1CCC/C/1=C(\N/C(=C(/N/C=C(/O)\N)\O)/CC(C)C)/O)O)/O)/O)C	C43H66N12O12S2	1007.19	69	6	0.49	17	15	17	283.47	472.91	4.11	0.74	-1.19	-3.91	-1.57	-0.36	-5.49	0.00324	3.21e-06	Moderately soluble	-10.25	5.66e-08	5.62e-11	Insoluble	-3.5	0.322	0.00032	Soluble	Low	No	Yes	No	No	No	No	No	-11.92	3	4	2	1	5	0.17	0	3	2	9.42
DBB7131	OC[C@H]1NC(=O)CNC(=O)[C@H](NC(=O)[C@H](n2cc(C[C@H](NC1=O)C(=O)O)c1ccccc21)N/C(=C(\Cc1c[nH]c2c1cccc2)/N/C(=C/1\CCCN1[C@H](c1ccc([nH]1)O)O)/O)/O)C(C)C	C44H52N10O11	896.94	65	23	0.34	11	11	14	253.27	318.66	1.4	2.97	-1.38	-2.4	-0.69	-0.02	-6.81	0.00014	1.56e-07	Poorly soluble	-9.33	4.24e-07	4.73e-10	Poorly soluble	-7.3	4.5e-05	5.01e-08	Poorly soluble	Low	No	Yes	No	No	No	No	No	-9.66	3	4	2	1	4	0.11	0	1	2	8.03
DBB7393	NC(=O)C[C@@H]1NC(=O)[C@@H](C/C=C(/O)\N)N/C(=C(\Cc2ccccc2)/N/C(=C(/Cc2ccc(cc2)O)\N/C(=C(/CSSC/C(=N\C1=O)/[C@H](N1CCC/C/1=C(\N[C@H](C(=O)O)CCCNC(=N)N)/O)O)\N)/O)/O)/O	C44H61N13O12S2	1028.17	71	12	0.36	18	14	19	287.62	496.43	0.45	0.6	-1.91	-6.05	-2.87	-1.96	-5.53	0.00304	2.95e-06	Moderately soluble	-10.6	2.59e-08	2.52e-11	Insoluble	-4.79	0.0169	1.64e-05	Moderately soluble	Low	No	Yes	No	No	No	No	No	-12.15	3	4	2	1	5	0.17	0	4	2	9.05
DBB8083	CC[C@H]([C@H](C(=O)/N=C(/[C@@H](N1CCC[C@@H]1C(=O)N[C@H](C(=O)O)Cc1ccccc1)O)\Cc1nc[nH]c1)NC(=O)[C@@H](N/C(=C(\C(C)C)/N/C(=C(/CCCN=C(N)N)\N)/O)/O)Cc1ccc(cc1)O)C	C46H66N12O9	931.09	67	17	0.46	28	13	13	255.89	352.25	3.23	0.83	1.28	-1.47	2.42	1.26	-4.48	0.0312	3.35e-05	Moderately soluble	-7.81	1.44e-05	1.55e-08	Poorly soluble	-6.75	0.000164	1.76e-07	Poorly soluble	Low	No	Yes	No	No	No	No	No	-11.39	3	3	2	1	5	0.17	0	3	2	8.59
DBB8084	NCCCC[C@@H](C(=O)NCC(=O)N)N/C(=C/1\CCCN1[C@@H](/C/1=N/C(=O)[C@H](CC(=O)N)N/C(=C(/C/C=C(/O)\N)\N/C(=C(/N/C(=C(/N/C(=C(/CSSC1)\N)/O)\Cc1ccc(cc1)O)/O)\Cc1ccccc1)/O)/O)O)/O	C46H65N13O12S2	1056.22	73	12	0.37	20	14	19	295.88	498.6	2.97	0.46	-1.7	-4.72	-2.59	-1.12	-5.48	0.0035	3.31e-06	Moderately soluble	-10.5	3.35e-08	3.17e-11	Insoluble	-5.35	0.00471	4.46e-06	Moderately soluble	Low	No	Yes	No	No	No	No	No	-12.42	3	4	2	1	5	0.17	0	2	2	9.21
DBB8351	CC[C@H]([C@H](C(=O)O)NC(=O)[C@@H](NC(=O)[C@H](NC(=O)[C@H](NC(=O)[C@H](Cc1ccccc1)NC(=O)CNC(=O)CNC(=O)[C@H](Cc1ccc(cc1)O)N)CC(C)C)CCCN=C(N)N)CCCN=C(N)N)C	C46H72N14O10	981.15	70	12	0.52	38	13	14	260.24	416.05	3.2	-3.71	-2.55	-2.35	1.88	-0.71	-1.2	61.2	0.0624	Very soluble	-4.44	0.0358	3.64e-05	Moderately soluble	-7.99	9.95e-06	1.01e-08	Poorly soluble	Low	No	Yes	No	No	No	No	No	-14.92	3	4	2	1	6	0.17	0	2	2	7.86
DBB8912	NC(=N)NCCCC(=N)[C@@H](N1CCC[C@H]1C(=O)N1CCC/C/1=C(\N/C=C(/N[C@@H](C(=O)N[C@@H]([C@H](N1CCC/C/1=C(\N[C@H](C(=O)N[C@@H](C(=O)O)CCCNC(=N)N)CC(C)C)/O)O)C(=O)C)Cc1ccccc1)\O)/O)O	C48H77N15O11	1040.22	74	6	0.58	34	15	18	286.57	424.25	1.65	-1.71	-1.54	-3.54	-1.22	-1.27	-3.03	0.975	0.000937	Soluble	-6.69	0.000214	2.06e-07	Poorly soluble	-3.6	0.264	0.000254	Soluble	Low	No	Yes	No	No	No	No	No	-13.86	3	4	2	1	5	0.17	0	3	2	9.23
DBB8933	N/C=C(\N/C(=C(\N=C(\C(=O)N1CCC/C/1=C(\N/C(=C(\N/C(=C(/N/C=C(/N/C(=C(\N[C@H](C(=O)NCC(=O)O)Cc1c[nH]c2c1cccc2)/O)/[C@H](O)C)\O)\O)/[C@@H](O)C)/O)/CCC(=O)O)/O)/CC(O)O)/O)/Cc1ccc(cc1)O)/O	C48H63N11O18	1082.08	77	15	0.31	30	19	23	275.38	493.12	1.45	-0.35	0.08	-5.89	-3.27	-1.6	-4.49	0.0348	3.22e-05	Moderately soluble	-9.54	3.1e-07	2.86e-10	Poorly soluble	-0.96	118	0.109	Soluble	Low	No	Yes	No	No	No	No	No	-13.15	3	3	2	1	5	0.11	0	3	2	8.58
DBB9251	OC/C/1=C(\O)/N/C(=C\c2cn(c3c2cccc3)/C(=C(/N/C(=C(\N/C(=C(\N1)/O)/Cc1ccccc1)/O)/C(C)C)\O)/N/C(=C(\N/C(=C\1/CCCN1[C@@H](c1ccc([nH]1)O)O)/O)/Cc1ccc(cc1)O)/O)/C(O)O	C49H57N9O12	964.03	70	26	0.22	13	12	19	277.98	338.9	3.68	6.85	2.44	-1.66	-1.27	2.01	-9.55	2.72e-07	2.82e-10	Poorly soluble	-13.78	1.61e-11	1.67e-14	Insoluble	-6.87	0.000131	1.36e-07	Poorly soluble	Low	No	Yes	No	No	No	No	No	-7.32	3	3	2	1	5	0.17	0	2	3	7.95
DBB9450	CC[C@H]([C@H](C(=O)/N=C(/[C@H](N1CCC[C@H]1C(=O)N[C@@H](C(=O)O)Cc1ccccc1)O)\Cc1nc[nH]c1)N/C(=C(/N/C(=C(\C(C)C)/N/C(=C(/NC(=O)C(=N)CC(O)O)\CCCN=C(N)N)/O)/O)\Cc1ccc(cc1)O)/O)C	C50H71N13O12	1046.18	75	17	0.44	32	17	17	282.22	422.8	1.44	-0.04	0.99	-2.97	1.65	0.21	-4.36	0.046	4.4e-05	Moderately soluble	-8.39	4.28e-06	4.09e-09	Poorly soluble	-5.82	0.00158	1.51e-06	Moderately soluble	Low	No	Yes	No	No	No	No	No	-12.71	3	3	2	1	5	0.17	0	4	2	9.15
DBB9451	OC[C@@H](C(=O)N1CCC[C@@H]1C(=O)N[C@H](C(=O)N[C@H](C(=O)O)CCCNC(=N)N)Cc1ccccc1)N/C(=C(\Cc1ccccc1)/N/C(=C/N/C(=C/1\CCCN1C(=O)[C@H]1CCCN1[C@H](C(=N)CCCNC(=N)N)O)/O)/O)/O	C50H73N15O11	1060.21	76	12	0.48	34	15	18	291.83	424.25	0.93	-2.03	-1.73	-3.43	-1.41	-1.53	-3.01	1.04	0.000983	Soluble	-6.35	0.000469	4.43e-07	Poorly soluble	-5	0.0106	9.98e-06	Moderately soluble	Low	No	Yes	No	No	No	No	No	-14.21	3	4	2	1	6	0.17	0	3	2	9.14
DBB9622	O=C[C@@H]([C@@H](N1CCC[C@H]1C(=O)N[C@@H](C(=O)N[C@H](C(=O)O)CCCN=C(N)N)Cc1ccccc1)O)N/C(=C(\Cc1ccccc1)/N/C(=C/N/C(=C/1\C[C@@H](CN1C(=O)[C@H]1CCCN1[C@@H](C(=N)CCCNC(=N)N)O)O)/O)/O)/O	C50H73N15O12	1076.21	77	12	0.48	33	17	18	292.99	446.98	1.68	-3.18	-2.97	-4.13	-2.19	-2.16	-2.45	3.85	0.00358	Soluble	-5.64	0.00248	2.3e-06	Moderately soluble	-3.4	0.429	0.000399	Soluble	Low	No	Yes	No	No	No	No	No	-15.12	3	4	2	1	6	0.17	0	4	2	9.46
DBB9626	CC[C@@H](/C(=C(/N/C(=C(/N/C(=C(\N[C@H](C(=O)/N=C(/[C@H](N1CCC[C@@H]1C(=O)N[C@H](C(=O)N[C@@H](C(=O)O)Cc1ccccc1)Cc1ccc(cc1)O)O)\Cc1nc[nH]c1)CCCN=C(N)N)/O)/CCCN=C(N)N)\O)/C)\O)/N)C	C50H74N16O10	1059.22	76	17	0.44	33	15	17	288.11	448.91	3.79	-0.98	0.02	-2.86	0.69	0.13	-3.78	0.177	0.000167	Soluble	-7.96	1.16e-05	1.09e-08	Poorly soluble	-6.24	0.000604	5.7e-07	Poorly soluble	Low	No	Yes	No	No	No	No	No	-13.46	3	3	2	1	5	0.17	0	3	2	9.35
DBB9867	CSCC[C@H](C(=O)N)NC(=O)[C@H](NC(=O)[C@H](Cc1nc[nH]c1)NC(=O)CNC(=O)[C@@H]([C@H](O)C)N/C(=C(\N/C(=C(\Cc1c[nH]c2c1cccc2)/N/C(=C(\NC(=O)/C(=N/C(=C/N)/O)/C[C@@H](O)N)/CC(C)C)/O)/O)/C)/O)Cc1ccccc1	C52H73N15O12S	1132.29	80	20	0.38	37	15	19	297.55	480.23	2.51	0.76	0.03	-5.06	1.13	-0.13	-5.08	0.00937	8.28e-06	Moderately soluble	-10.42	4.26e-08	3.76e-11	Insoluble	-7.62	2.69e-05	2.38e-08	Poorly soluble	Low	No	Yes	No	No	No	No	No	-12.67	3	3	2	1	5	0.17	0	3	2	9.52
DBB9961	NCCCC/C(=C(\N/C(=C(/N=C(\C(=O)N[C@@H](C(=O)N[C@@H](C(O)O)/C=C/C(=O)N)/C=C(\O)/N)/CC(O)O)\O)/Cc1c[nH]c2c1cccc2)/O)/N/C(=C(\N/C(=C(/N/C(=C/1\CCCN1[C@H](C(=N)CCCN=C(N)N)O)/O)\CCCCN)/O)/CC(C)C)/O	C53H85N17O14	1184.35	84	9	0.47	39	19	25	316.01	569.64	2.65	-2.35	-1.06	-6.21	-1.89	-1.77	-3.21	0.734	0.00062	Soluble	-9.08	9.96e-07	8.41e-10	Poorly soluble	-1.7	23.6	0.0199	Soluble	Low	No	Yes	No	No	No	No	No	-15.19	3	4	2	1	6	0.17	0	5	2	9.95
DCM100585	OC(=O)[C@@H](NC(=O)c1c(C)cccc1C)Cc1ccccc1	C18H19NO3	297.35	22	12	0.22	6	3	2	85.24	66.4	2.43	3.32	2.73	3	3.49	2.99	-3.78	0.049	0.000165	Soluble	-4.39	0.0121	4.07e-05	Moderately soluble	-5.51	0.000925	3.11e-06	Moderately soluble	High	Yes	No	No	No	No	No	No	-5.76	0	0	0	0	0	0.56	0	0	0	2.39
DCM100767	CCOc1cc(CCNC(=O)[C@H]2CCCN2C(=O)OCc2ccccc2)ccc1OCC	C25H32N2O5	440.53	32	12	0.44	13	5	1	126.32	77.1	4.29	4.12	3.41	2.37	4.09	3.66	-4.59	0.0114	2.59e-05	Moderately soluble	-5.45	0.00158	3.58e-06	Moderately soluble	-6.98	4.58e-05	1.04e-07	Poorly soluble	High	Yes	No	No	Yes	Yes	Yes	Yes	-6.06	0	0	1	0	0	0.55	0	0	3	3.87
DCM101079	CC(C[C@H](C(=O)NCC(=O)N)NC(=O)[C@H]1CCCN1[C@H](/C(=N/C(=O)OCc1ccccc1)/C)O)C	C24H35N5O6	489.56	35	6	0.54	15	8	4	133.26	163.42	2.78	1.3	0.17	0.15	1.55	1.19	-2.83	0.722	0.00148	Soluble	-4.33	0.0228	4.66e-05	Moderately soluble	-3.77	0.0839	0.000171	Soluble	Low	No	Yes	No	No	No	No	No	-8.36	1	2	2	1	1	0.55	0	1	2	5.01
DCM101081	C[C@H](C(=O)N[C@H](C(=O)O)Cc1ccccc1)NC(=O)C1(CCN(CC1)C(=O)OC(C)(C)C)c1ccccc1	C29H37N3O6	523.62	38	12	0.45	13	6	3	146.87	125.04	2.83	3.7	2.89	2.14	3.4	2.99	-4.79	0.00843	1.61e-05	Moderately soluble	-6.02	0.000504	9.63e-07	Poorly soluble	-6.58	0.000136	2.6e-07	Poorly soluble	High	No	Yes	No	No	No	No	Yes	-6.87	1	3	1	0	0	0.56	0	0	3	4.44
DCM101256	CC([C@@H](C(=O)NC[C@@H](c1ccco1)N1CCCCC1)NC(=O)c1ccccc1F)C	C23H30FN3O3	415.5	30	11	0.48	10	5	2	116.72	74.58	3.55	3.52	3.23	2.09	3.82	3.24	-4.25	0.0236	5.69e-05	Moderately soluble	-4.77	0.00705	1.7e-05	Moderately soluble	-6.37	0.000179	4.31e-07	Poorly soluble	High	Yes	Yes	No	No	No	Yes	Yes	-6.34	0	0	0	0	0	0.55	0	0	3	4.05
DCM101792	CSCC[C@H](C(=O)NC[C@@H]1CC[C@H](CC1)C(=O)N[C@@H](C(=O)O)Cc1ccccc1)N	C22H33N3O4S	435.58	30	6	0.59	13	5	4	119.47	146.82	2.38	-0.93	1.8	1.36	2.56	1.43	-1.24	24.8	0.0569	Very soluble	-1.67	9.33	0.0214	Very soluble	-4.72	0.00826	1.9e-05	Moderately soluble	Low	No	Yes	No	No	No	No	No	-9.62	0	0	2	1	0	0.55	0	0	2	4.27
DCM102547	OC/C(=N\C(=O)/C=C/1\CCCCC[C@H](C(=O)OC[C@H]2N([C@H]1O)CCC2)Cc1ccc(cc1)F)/Cc1ccccc1	C32H39FN2O5	550.66	40	12	0.47	7	8	2	156.79	99.43	4.36	4.8	4.44	3.82	5.39	4.56	-6.04	0.000504	9.16e-07	Poorly soluble	-6.62	0.000132	2.4e-07	Poorly soluble	-7.26	3.05e-05	5.53e-08	Poorly soluble	High	No	Yes	No	No	No	No	Yes	-6.25	1	3	0	0	0	0.55	0	2	2	6.1
DCM102551	OC/C(=N\C(=O)/C=C/1\CCCCC[C@@H](C(=O)OC[C@@H](N[C@H]1O)C)Cc1ccc(cc1)F)/Cc1ccccc1	C30H37FN2O5	524.62	38	12	0.43	7	8	3	149.19	108.22	3.77	4.21	3.96	3.45	5.37	4.15	-5.52	0.0016	3.04e-06	Moderately soluble	-6.19	0.000337	6.42e-07	Poorly soluble	-7.56	1.44e-05	2.74e-08	Poorly soluble	High	No	Yes	No	No	No	No	Yes	-6.51	1	3	0	0	0	0.55	0	2	2	5.78
DCM102556	OC/C(=N\C(=O)/C=C/1\CCCC/C(=C/C(=O)OC(C)(C)C)/[C@@H](OC[C@H]2N([C@@H]1O)CCC2)O)/Cc1ccccc1	C30H42N2O7	542.66	39	6	0.57	8	9	3	153.38	128.89	3.2	2.3	2.69	2.07	3.6	2.77	-4.24	0.0313	5.76e-05	Moderately soluble	-4.64	0.0123	2.27e-05	Moderately soluble	-4.25	0.0303	5.58e-05	Moderately soluble	High	No	Yes	No	No	No	No	No	-7.98	1	3	0	0	0	0.55	0	2	2	6.39
DCM102568	OC[C@@H](N1C[C@@H](C)[C@H](CN(C(=O)Nc2ccc3c(c2)OCO3)C)Oc2c(C1=O)cc(cc2)NC(=O)CCN1CCOCC1)C	C31H41N5O8	611.69	44	12	0.52	12	9	3	169.95	142.14	3.52	1.21	1.32	0.49	1.52	1.61	-3.8	0.0959	0.000157	Soluble	-3.79	0.0988	0.000162	Soluble	-5.74	0.00111	1.82e-06	Moderately soluble	Low	No	Yes	No	No	No	No	Yes	-9.17	2	3	2	1	1	0.17	0	0	2	5.54
DCM102570	OC[C@H](N1C[C@@H](C)[C@@H](CN(Cc2ccccc2)C)Oc2c(C1=O)cc(cc2)NC(=O)Cc1ccccc1)C	C31H37N3O4	515.64	38	18	0.35	10	5	2	153.63	82.11	4.09	4.04	3.5	2.79	4.16	3.72	-5.27	0.00275	5.34e-06	Moderately soluble	-5.47	0.00176	3.41e-06	Moderately soluble	-8.44	1.87e-06	3.63e-09	Poorly soluble	High	No	Yes	No	Yes	No	Yes	Yes	-6.58	1	3	0	0	0	0.55	0	0	3	4.68
DCM102579	OC[C@H](N1C[C@H](C)[C@@H](Oc2c(C1=O)cccc2NC(=O)Nc1ccc(cc1)OC)CN(S(=O)(=O)c1ccccc1)C)C	C30H36N4O7S	596.69	42	18	0.33	11	8	3	163.36	145.89	3.05	3.11	4.2	1.79	1.52	2.73	-5.09	0.00485	8.13e-06	Moderately soluble	-5.84	0.000858	1.44e-06	Moderately soluble	-7.63	1.39e-05	2.32e-08	Poorly soluble	Low	No	Yes	No	No	No	Yes	Yes	-7.73	2	3	2	1	0	0.17	0	0	2	5.28
DCM102581	OC[C@H](N1C[C@H](C)[C@H](CN(Cc2ccncc2)C)Oc2c(C1=O)cc(cc2)N/C(=C/CCCCC(=O)Nc1ccccc1N)/O)C	C35H46N6O5	630.78	46	18	0.4	15	7	5	185.3	153.28	4.23	3.68	4.12	1.03	3.25	3.26	-5.37	0.0027	4.28e-06	Moderately soluble	-6.59	0.000163	2.58e-07	Poorly soluble	-8.34	2.87e-06	4.55e-09	Poorly soluble	Low	No	Yes	No	No	No	No	Yes	-7.53	2	3	2	1	2	0.17	0	2	3	5.64
DCM102583	OC[C@H](N1C[C@H](C)[C@@H](CN(C(=O)Nc2ccccc2)C)Oc2c(C1=O)cccc2NC(=O)NC(C)C)C	C27H37N5O5	511.61	37	12	0.44	11	5	4	146.87	123.24	3.29	2.42	2.84	2.12	1.35	2.4	-4.05	0.0455	8.9e-05	Moderately soluble	-4.65	0.0114	2.24e-05	Moderately soluble	-5.99	0.00052	1.02e-06	Moderately soluble	High	No	Yes	No	No	No	No	Yes	-7.7	1	3	1	0	0	0.55	0	0	2	4.92
DCM102610	OC[C@H](N1C[C@@H](C)[C@H](OCCCC[C@@H](Oc2c(C1=O)cc(cc2)NC(=O)Nc1ccc(cc1)F)C)CN(C(=O)Cc1ccccc1)C)C	C37H47FN4O6	662.79	48	18	0.43	11	7	3	188.44	120.44	3.72	4.85	5.62	3.32	4.29	4.36	-6.56	0.000184	2.78e-07	Poorly soluble	-7.11	5.11e-05	7.7e-08	Poorly soluble	-9.41	2.55e-07	3.85e-10	Poorly soluble	Low	No	Yes	No	No	No	No	Yes	-6.9	1	4	1	0	1	0.55	0	0	3	6.34
DCM102611	OC[C@@H](N1C[C@H](C)[C@H](OCCCC[C@@H](Oc2c(C1=O)cc(cc2)NC(=O)c1ccncc1)C)CN(C(=O)Cc1ccccc1)C)C	C36H46N4O6	630.77	46	18	0.44	10	7	2	181.77	121.3	3.88	3.95	4.26	1.97	4.05	3.62	-5.87	0.000853	1.35e-06	Moderately soluble	-6.2	0.0004	6.35e-07	Poorly soluble	-8.76	1.11e-06	1.75e-09	Poorly soluble	High	No	Yes	No	No	No	No	Yes	-7.34	1	3	0	0	1	0.55	0	0	3	6.16
DCM102617	OC[C@@H](N1C[C@H](C)[C@H](OCCCC[C@H](Oc2c(C1=O)cc(cc2)NC(=O)c1ccncc1)C)CN(C(=O)CCC(F)(F)F)C)C	C32H43F3N4O6	636.7	45	12	0.56	11	10	2	167.09	121.3	3.68	3.76	5.62	1.74	4.01	3.76	-5.63	0.0015	2.36e-06	Moderately soluble	-6	0.000636	9.99e-07	Poorly soluble	-7.52	1.91e-05	3.01e-08	Poorly soluble	Low	No	Yes	No	No	No	No	Yes	-7.51	1	4	1	0	1	0.55	0	0	3	6.01
DCM102624	COc1ccc(cc1)NC(=O)N(C[C@H]1OCCCC[C@H](C)Oc2c(C(=O)N(C[C@H]1C)[C@@H](CO)C)cc(cc2)NC(=O)c1ccccc1)C	C37H48N4O7	660.8	48	18	0.43	11	7	3	190.39	129.67	4.44	4.78	5.14	2.47	3.53	4.07	-6.5	0.000209	3.16e-07	Poorly soluble	-7.23	3.85e-05	5.83e-08	Poorly soluble	-8.86	9.1e-07	1.38e-09	Poorly soluble	Low	No	Yes	No	No	No	No	Yes	-6.94	2	3	1	0	1	0.17	0	0	3	6.4
DCM102625	OC[C@H](N1C[C@@H](C)[C@H](OCCCC[C@@H](Oc2c(C1=O)cc(cc2)NC(=O)Nc1ccccc1)C)CN(Cc1ccc(c(c1)Cl)Cl)C)C	C36H46Cl2N4O5	685.68	47	18	0.44	10	6	3	193.49	103.37	4.59	6.44	6.65	4.11	5.19	5.39	-7.77	1.16e-05	1.69e-08	Poorly soluble	-8.4	2.7e-06	3.94e-09	Poorly soluble	-10.38	2.83e-08	4.12e-11	Insoluble	Low	No	Yes	No	No	No	Yes	Yes	-5.91	1	4	0	1	2	0.55	0	0	3	6.28
DCM102767	COc1ccc(cc1)Cn1c(=O)c(CC(=O)NC(c2ccccc2)c2ccccc2)cc(c1C)[C@H](N(C)C)O	C32H35N3O4	525.64	39	24	0.25	11	5	2	153.1	83.8	3.7	3.48	3.57	3.31	5.12	3.84	-5.02	0.00501	9.53e-06	Moderately soluble	-4.92	0.00629	1.2e-05	Moderately soluble	-9.41	2.06e-07	3.92e-10	Poorly soluble	High	No	Yes	No	Yes	Yes	Yes	Yes	-7.04	1	3	1	0	0	0.55	0	1	2	4.68
DCM102768	COc1ccc(cc1)Cn1c(C)c(cc(c1=O)CC(=O)NCc1cccc2c1cccc2)[C@@H](N(C)C)O	C30H33N3O4	499.6	37	22	0.27	10	5	2	146.12	83.8	2.47	3.03	3.3	2.97	4.87	3.33	-4.63	0.0118	2.36e-05	Moderately soluble	-4.46	0.0175	3.51e-05	Moderately soluble	-8.95	5.57e-07	1.11e-09	Poorly soluble	High	No	Yes	No	Yes	Yes	Yes	Yes	-7.2	0	2	0	0	0	0.55	0	1	2	4.22
DCM102814	OC[C@H](N1C[C@@H](C)[C@@H](OCCCC[C@@H](Oc2c(C1=O)cc(cc2)NC(=O)c1ccccc1)C)CN(Cc1ccc2c(c1)OCO2)C)C	C37H47N3O7	645.78	47	18	0.46	9	8	2	185.03	109.8	4.17	5.27	4.87	2.49	4.49	4.26	-6.85	9.05e-05	1.4e-07	Poorly soluble	-7.33	3.05e-05	4.72e-08	Poorly soluble	-8.91	7.93e-07	1.23e-09	Poorly soluble	High	No	Yes	No	No	No	No	Yes	-6.5	1	3	0	0	2	0.55	0	0	3	6.42
DCM103705	CC(c1cc(O)n2c(n1)nc(n2)N)C	C8H11N5O	193.21	14	9	0.38	1	4	2	51.79	89.33	1.5	0.89	0.54	0.51	-0.37	0.62	-2.01	1.9	0.00981	Soluble	-2.35	0.862	0.00446	Soluble	-1.23	11.3	0.0585	Soluble	High	No	No	No	No	No	No	No	-6.85	0	0	0	0	1	0.55	0	0	1	2.52
DCM10397	CCc1ccc(cc1)n1cc(cc1O)[C@@H](NNC(=O)c1ccc(cc1)F)O	C20H20FN3O3	369.39	27	17	0.15	7	5	4	98.97	86.52	2.75	3.18	2.91	3.31	2.31	2.89	-4.14	0.0269	7.29e-05	Moderately soluble	-4.67	0.00793	2.15e-05	Moderately soluble	-5.79	0.000606	1.64e-06	Moderately soluble	High	No	Yes	No	No	No	No	No	-6.3	0	0	0	0	0	0.55	0	1	1	3.44
DCM104065	Nc1nn2c(n1)nc(cc2O)c1ccccc1	C11H9N5O	227.22	17	15	0	1	4	2	62.65	89.33	1.46	1.39	1.09	1.18	0.17	1.06	-2.71	0.442	0.00194	Soluble	-2.87	0.307	0.00135	Soluble	-2.93	0.266	0.00117	Soluble	High	No	No	Yes	No	No	No	No	-6.7	0	0	0	0	0	0.55	0	0	1	2.46
DCM104377	O=C(Cc1ccc(cc1)F)NC1CCCCCC1	C15H20FNO	249.32	18	6	0.53	4	2	1	70.71	29.1	2.8	3.59	3.63	3.24	3.72	3.4	-3.63	0.0584	0.000234	Soluble	-3.89	0.0323	0.00013	Soluble	-4.8	0.00393	1.58e-05	Moderately soluble	High	Yes	No	Yes	No	No	Yes	No	-5.27	0	0	0	0	0	0.55	0	0	2	1.83
DCM10478	OC(=O)/C=C/[C@@H](C(O)O)NC(=O)C1CCN(CC1)[C@H](C(=N)Cc1ccccc1)O	C20H27N3O6	405.44	29	6	0.45	10	8	6	109.97	154.18	0.91	-2.71	-0.67	-0.32	0.52	-0.45	-0.14	294	0.725	Very soluble	0.02	428	1.05	Highly soluble	-1.19	26.1	0.0644	Soluble	Low	No	No	No	No	No	No	No	-10.7	1	1	1	1	3	0.55	0	3	2	4.19
DCM10517	OC[C@H]([C@H]([C@@H]1C[C@H]1C(=O)N1CCCC1)O)NC(=O)[C@@H](NC(=O)OC(C)(C)C)COCc1ccccc1	C26H39N3O7	505.6	36	6	0.65	16	7	4	136.45	137.43	3.23	0.76	0.66	0.27	2.05	1.39	-2.52	1.52	0.00301	Soluble	-3.23	0.301	0.000594	Soluble	-3.88	0.067	0.000132	Soluble	High	No	Yes	No	No	No	No	No	-8.84	1	3	1	1	1	0.55	0	0	2	5.23
DCM105230	CCOC(=O)c1nn(c2ccccc2)c(=O)cc1SC1CCCCC1	C19H22N2O3S	358.45	25	12	0.42	6	4	0	99.56	86.49	3.31	4.2	3.83	3.76	3.57	3.73	-4.67	0.00771	2.15e-05	Moderately soluble	-5.73	0.000674	1.88e-06	Moderately soluble	-5.23	0.00209	5.83e-06	Moderately soluble	High	No	No	No	Yes	Yes	No	No	-5.5	0	0	0	0	0	0.55	0	0	2	3.32
DCM105452	Fc1ccc(cc1)CNC(=O)c1cc2ccccc2nc1C	C18H15FN2O	294.32	22	16	0.11	4	3	1	84.15	41.99	2.9	3.46	3.88	3.18	4.38	3.56	-4.12	0.0224	7.61e-05	Moderately soluble	-4.02	0.0279	9.47e-05	Moderately soluble	-7.28	1.54e-05	5.24e-08	Poorly soluble	High	Yes	No	Yes	Yes	No	Yes	Yes	-5.64	0	0	0	0	0	0.55	0	0	0	1.94
DCM105604	O=C(c1cc2c([nH]1)cccc2)NCCN1CCCCC1	C16H21N3O	271.36	20	9	0.44	5	2	2	84.83	48.13	2.82	2.94	2	1.74	2.9	2.48	-3.38	0.114	0.000419	Soluble	-3.61	0.0662	0.000244	Soluble	-4.82	0.00413	1.52e-05	Moderately soluble	High	Yes	Yes	Yes	Yes	No	Yes	No	-5.87	0	0	0	0	0	0.55	0	0	0	1.99
DCM105893	O=C(Nc1ccc(cc1C(F)(F)F)Cl)CN1C(=O)NC2(C1=O)CCCC2	C16H15ClF3N3O3	389.76	26	6	0.44	5	6	2	94.54	78.51	2.7	2.61	3.36	2.18	2.82	2.73	-3.74	0.0707	0.000181	Soluble	-3.91	0.0481	0.000124	Soluble	-5.33	0.00183	4.69e-06	Moderately soluble	High	Yes	Yes	Yes	No	Yes	No	Yes	-6.82	0	0	0	0	0	0.55	0	1	1	2.99
DCM10630	OC[C@@H]([C@H]([C@@H]1C[C@@H]1C(=O)NC1CC1)O)NC(=O)[C@H](NC(=O)OC(C)(C)C)COCc1ccccc1	C25H37N3O7	491.58	35	6	0.64	17	7	5	127.63	146.22	2.73	0.65	0.63	0.06	1.91	1.2	-2.3	2.45	0.00499	Soluble	-3.3	0.248	0.000505	Soluble	-4.1	0.0391	7.96e-05	Moderately soluble	Low	No	Yes	No	No	No	No	No	-8.84	0	2	2	1	1	0.55	0	0	2	5.11
DCM106485	OC(=O)[C@H](NC(=O)c1ccccc1NC(=O)c1ccccc1)Cc1ccccc1	C23H20N2O4	388.42	29	18	0.09	9	4	3	109.53	95.5	2.37	4.17	3.17	3.12	3.26	3.22	-4.74	0.00706	1.82e-05	Moderately soluble	-5.88	0.000507	1.31e-06	Moderately soluble	-7.19	2.5e-05	6.44e-08	Poorly soluble	High	No	No	No	No	Yes	Yes	No	-5.71	0	0	0	0	0	0.56	0	0	3	2.96
DCM106505	C[C@H](NC(=O)C[C@H](c1ccccc1O)c1ccccc1)Cc1ccccc1	C24H25NO2	359.46	27	18	0.21	8	2	2	109.44	49.33	2.98	4.92	4.66	4.21	5.18	4.39	-5.13	0.00264	7.35e-06	Moderately soluble	-5.69	0.00073	2.03e-06	Moderately soluble	-8.1	2.83e-06	7.87e-09	Poorly soluble	High	Yes	Yes	No	Yes	Yes	Yes	Yes	-5	1	0	0	0	0	0.55	0	0	3	3.18
DCM106523	C[C@@H](NC(=O)C(=O)N1CCOCC1)CCc1ccccc1	C16H22N2O3	290.36	21	6	0.5	7	3	1	83.65	58.64	2.64	1.81	0.6	0.86	2.19	1.62	-2.53	0.857	0.00295	Soluble	-2.66	0.634	0.00218	Soluble	-3.77	0.0492	0.000169	Soluble	High	No	No	No	No	No	No	No	-6.79	0	0	0	0	0	0.55	0	1	0	2.55
DCM106536	C[C@@H](NC(=O)c1ccc(cc1)F)CCc1ccccc1	C17H18FNO	271.33	20	12	0.24	6	2	1	78.3	29.1	2.94	4.05	4	4.14	4.32	3.89	-4.12	0.0205	7.56e-05	Moderately soluble	-4.36	0.0117	4.32e-05	Moderately soluble	-6.44	9.87e-05	3.64e-07	Poorly soluble	High	Yes	No	Yes	Yes	No	Yes	No	-5.08	0	0	0	0	0	0.55	0	0	1	2.1
DCM106662	O=C(C1CCCCC1)N[C@@H](C(=O)O)Cc1ccccc1	C16H21NO3	275.34	20	6	0.5	6	3	2	77.33	66.4	1.97	3.01	2.38	2.1	2.55	2.4	-3.27	0.148	0.000538	Soluble	-4.07	0.0235	8.53e-05	Moderately soluble	-3.66	0.0602	0.000219	Soluble	High	Yes	No	No	No	No	No	No	-5.84	0	0	0	0	0	0.56	0	0	0	2.43
DCM106741	O=C(Nc1ccc2c(c1)n(C)c(=O)n2C)CSc1nc(O)c2c(n1)cccc2	C19H17N5O3S	395.43	28	19	0.16	5	5	2	109.4	127.34	2.04	2.27	2.07	1.84	1.58	1.96	-3.89	0.0505	0.000128	Soluble	-4.58	0.0104	2.62e-05	Moderately soluble	-5.26	0.00219	5.53e-06	Moderately soluble	High	No	No	No	No	Yes	No	No	-7.1	0	0	0	0	0	0.55	0	0	1	2.82
DCM107015	CCOc1cc(ccc1O)[C@@H](N(c1ccccc1C)C(=O)Cn1nnc2c1cccc2)C(=O)NC[C@H]1CCCO1	C30H33N5O5	543.61	40	21	0.33	12	7	2	151.11	118.81	3.6	4.1	3.59	2.28	3.32	3.38	-5.39	0.00222	4.07e-06	Moderately soluble	-6.3	0.000272	5e-07	Poorly soluble	-7.62	1.29e-05	2.37e-08	Poorly soluble	High	No	Yes	No	Yes	Yes	Yes	Yes	-6.71	1	3	1	0	0	0.55	0	0	3	4.69
DCM107080	COc1c(OC)cccc1[C@H](N([C@@H](/C=C/C(=O)Nc1noc(c1)C)O)CCc1ccccc1)C(=O)NC(C)(C)C	C30H38N4O6	550.65	40	17	0.37	15	8	3	152.43	126.16	3.83	3.94	3.5	1.85	4.08	3.44	-5.06	0.00479	8.7e-06	Moderately soluble	-6.29	0.000283	5.14e-07	Poorly soluble	-7.65	1.24e-05	2.26e-08	Poorly soluble	High	No	Yes	No	No	No	Yes	Yes	-6.86	1	3	1	0	0	0.55	0	2	3	5.15
DCM1071	COc1ccc(cc1)[C@H](N1CCCC1)CNC(=O)c1cc(O)nc2c1cccc2	C23H25N3O3	391.46	29	16	0.3	7	5	2	116.47	74.69	3.51	3.47	2.81	2.36	3.44	3.12	-4.4	0.0156	3.99e-05	Moderately soluble	-4.72	0.00745	1.9e-05	Moderately soluble	-6.6	9.88e-05	2.52e-07	Poorly soluble	High	Yes	Yes	Yes	Yes	Yes	Yes	Yes	-6.22	0	0	0	0	0	0.55	0	0	1	3.07
DCM107126	CCOc1ccc(cc1)NC(=O)N1CCC(CC1)NC(=O)[C@H](Cc1ccc(c(c1)OC)OC)NC(=O)C	C27H36N4O6	512.6	37	12	0.44	14	6	3	143.88	118.23	3.38	2.6	2.39	1.31	2.73	2.48	-3.97	0.0547	0.000107	Soluble	-4.73	0.0095	1.85e-05	Moderately soluble	-6.84	7.32e-05	1.43e-07	Poorly soluble	High	No	Yes	No	No	No	Yes	Yes	-7.58	1	3	1	0	0	0.55	0	0	2	4.32
DCM107128	COc1ccc(cc1OC)C[C@@H](C(=O)NC1CCN(CC1)C(=O)c1ccc(c(c1)OC)OC)NC(=O)C	C27H35N3O7	513.58	37	12	0.44	13	7	2	141.05	115.43	3.48	2.47	1.81	0.76	3.18	2.34	-3.96	0.056	0.000109	Soluble	-4.54	0.0149	2.9e-05	Moderately soluble	-6.52	0.000157	3.05e-07	Poorly soluble	High	No	Yes	No	No	No	Yes	Yes	-7.68	1	3	1	0	0	0.55	0	0	2	4.18
DCM107142	COC(=O)c1ccccc1S(=O)(=O)N1CCC(CC1)NC(=O)[C@H](Cc1cccc(c1OC)OC)NC(=O)C	C26H33N3O8S	547.62	38	12	0.42	13	9	2	142.25	148.72	3.62	2.07	2.21	0.6	1.97	2.09	-3.92	0.0666	0.000122	Soluble	-4.82	0.00824	1.51e-05	Moderately soluble	-6.27	0.000293	5.35e-07	Poorly soluble	Low	No	Yes	No	No	No	No	Yes	-8.17	2	3	2	1	0	0.17	0	0	2	4.7
DCM107184	CCCCCn1c(=O)[nH]c2c(c1=O)ccc(c2)C(=O)NCCCN1CCCCC1	C22H32N4O3	400.51	29	10	0.59	10	4	2	120.66	87.2	3.74	2.94	2.1	2.37	3.98	3.03	-3.77	0.0679	0.00017	Soluble	-4.43	0.0148	3.69e-05	Moderately soluble	-6.18	0.000262	6.55e-07	Poorly soluble	High	No	Yes	No	Yes	No	Yes	Yes	-6.66	0	0	0	0	0	0.55	0	0	2	3.03
DCM107328	OC(=O)[C@H](Cc1ccccc1)NC(=O)[C@@H]1CCCN1C(=O)OC(C)(C)C	C19H26N2O5	362.42	26	6	0.53	9	5	2	100.27	95.94	2.32	2.57	1.82	1.5	1.66	1.97	-3.28	0.189	0.000521	Soluble	-4.23	0.0212	5.85e-05	Moderately soluble	-3.29	0.185	0.000512	Soluble	High	No	Yes	No	No	No	No	No	-6.69	0	0	0	0	0	0.56	0	0	2	3.51
DCM107408	Fc1ccc(cc1)C(=O)NCCCc1nc2c([nH]1)cccc2	C17H16FN3O	297.33	22	15	0.18	6	3	2	83.15	57.78	2	3.21	3.48	2.81	4.14	3.13	-3.81	0.0456	0.000153	Soluble	-4.1	0.0239	8.02e-05	Moderately soluble	-6.91	3.64e-05	1.22e-07	Poorly soluble	High	Yes	No	Yes	Yes	No	Yes	Yes	-5.83	0	0	0	0	0	0.55	0	0	0	1.99
DCM108061	CC[C@]1(NC(=O)N(C1=O)CC(=O)NC1CCCCCC1)c1ccc(cc1)Cl	C20H26ClN3O3	391.89	27	6	0.55	6	3	2	111.88	78.51	3.2	4.01	2.47	2.61	3.18	3.09	-4.56	0.0107	2.73e-05	Moderately soluble	-5.36	0.00171	4.35e-06	Moderately soluble	-5.84	0.000568	1.45e-06	Moderately soluble	High	No	Yes	No	Yes	Yes	No	Yes	-5.84	0	0	0	0	0	0.55	0	1	2	3.29
DCM108385	O=C(Nc1ccc(cc1C)Cl)CN1C(=O)NC2(C1=O)CCCC2	C16H18ClN3O3	335.79	23	6	0.44	4	3	2	94.51	78.51	2.72	2.09	1.5	1.56	2.25	2.02	-3.17	0.228	0.00068	Soluble	-3.37	0.144	0.000428	Soluble	-4.87	0.00454	1.35e-05	Moderately soluble	High	No	Yes	Yes	No	Yes	No	No	-6.86	0	0	0	0	0	0.55	0	1	0	2.77
DCM108903	CC(/C(=N\C(=O)c1ccccc1)/[C@@H](OCC(=O)N1CCCCCC1)O)C	C20H28N2O4	360.45	26	6	0.55	8	5	1	105.15	79.2	3.41	2.77	2.28	1.99	3.27	2.74	-3.46	0.124	0.000345	Soluble	-4.09	0.0294	8.15e-05	Moderately soluble	-3.79	0.059	0.000164	Soluble	High	No	No	No	Yes	No	No	No	-6.53	0	0	0	0	0	0.55	0	2	2	3.9
DCM108925	COCCn1c(=O)[nH]c2c(c1=O)ccc(c2)C(=O)NCc1ccccc1	C19H19N3O4	353.37	26	16	0.21	7	4	2	98.27	93.19	2.61	1.25	1.11	1.49	2.95	1.88	-2.81	0.545	0.00154	Soluble	-2.81	0.553	0.00157	Soluble	-6.13	0.000259	7.33e-07	Poorly soluble	High	No	No	No	No	No	No	No	-7.57	0	0	0	0	0	0.55	0	0	1	2.59
DCM109307	COc1cc(OC)c(cc1CNC(=O)c1cc(O)nc2c1cccc2)OC	C20H20N2O5	368.38	27	16	0.2	7	6	2	100.73	89.91	3.14	2.85	2.74	1.44	3.13	2.66	-3.9	0.0468	0.000127	Soluble	-4.4	0.0148	4.01e-05	Moderately soluble	-6.38	0.000154	4.18e-07	Poorly soluble	High	No	No	Yes	No	Yes	Yes	Yes	-6.52	0	0	0	0	0	0.55	0	0	1	2.59
DCM109524	CC[C@H](c1cccc(c1)Cl)/N=N/C(=O)C1CC1	C13H15ClN2O	250.72	17	6	0.46	5	3	0	68.2	41.79	3.14	3.87	3.79	3.12	4.46	3.67	-3.76	0.0432	0.000172	Soluble	-4.44	0.00901	3.59e-05	Moderately soluble	-4.5	0.00786	3.13e-05	Moderately soluble	High	Yes	No	Yes	Yes	Yes	No	No	-5.08	0	0	0	0	0	0.55	1	1	1	2.77
DCM109854	O=C(/N=C/[C@H](N1C[C@H](C[C@@H]1C(=O)N1CCC[C@H]1C(=O)OCc1ccccc1)O)O)OCc1ccccc1	C27H31N3O7	509.55	37	12	0.41	12	9	2	141.75	128.97	3.63	2.21	0.82	1.38	2.08	2.02	-3.84	0.0737	0.000145	Soluble	-4.55	0.0143	2.8e-05	Moderately soluble	-4.05	0.0451	8.85e-05	Moderately soluble	High	No	No	No	No	No	No	Yes	-7.84	1	2	1	0	0	0.55	0	2	2	5.25
DCM109962	O=C(NC[C@H]1CCCO1)CO[C@H](/C(=N/C(=O)c1ccccc1)/C(C)C)O	C19H26N2O5	362.42	26	6	0.53	10	6	2	97.42	97.22	2.77	1.79	1.55	0.96	2.88	1.99	-2.73	0.682	0.00188	Soluble	-3.45	0.129	0.000355	Soluble	-3.86	0.0504	0.000139	Soluble	High	No	Yes	No	No	No	No	No	-7.24	0	0	0	0	0	0.55	0	2	2	4.1
DCM110206	CO[C@H](/C(=N\C(=O)[C@@H]1CCC(=O)N1C(=O)OCc1ccccc1)/Cc1ccc(cc1)O)O	C23H24N2O7	440.45	32	12	0.3	10	8	2	118.69	125.73	2.99	1.89	1.66	1.19	2.57	2.06	-3.38	0.184	0.000418	Soluble	-4.15	0.031	7.03e-05	Moderately soluble	-4.47	0.0149	3.39e-05	Moderately soluble	High	No	Yes	No	No	No	No	No	-7.64	0	0	0	0	0	0.55	0	2	2	4.42
DCM110208	CSCC/C(=N\C(=O)OC(C)(C)C)/[C@@H](N1CCC(CC1)C(=O)N[C@@H](C(=O)NCc1ccc(cc1)OC)C)O	C27H42N4O6S	550.71	38	6	0.63	16	8	3	154.08	154.86	4.1	2.48	2.44	1.47	3.56	2.81	-3.88	0.073	0.000133	Soluble	-5.38	0.00231	4.2e-06	Moderately soluble	-5.4	0.00221	4.02e-06	Moderately soluble	Low	No	Yes	No	No	No	No	Yes	-7.9	1	3	2	1	2	0.55	0	1	2	5.39
DCM110214	C[C@@H]([C@@H](C(=O)O)NC(=O)C1CCN(CC1)[C@@H](/C(=N\S(=O)(=O)c1ccc(cc1)C)/Cc1ccccc1)O)O	C26H33N3O7S	531.62	37	12	0.42	11	9	4	142.15	164.98	3.02	-0.3	2.05	1.37	1.99	1.63	-2.46	1.84	0.00346	Soluble	-2.7	1.05	0.00197	Soluble	-4.76	0.00922	1.73e-05	Moderately soluble	Low	No	Yes	No	No	No	No	No	-9.76	1	2	2	1	1	0.55	0	1	2	5.18
DCM110215	CC(C[C@H](C(=O)O)NC(=O)C1CCN(CC1)[C@@H](/C(=N\S(=O)(=O)c1ccc(cc1)C)/Cc1ccccc1)O)C	C28H37N3O6S	543.67	38	12	0.46	12	8	3	150.6	144.75	3.62	1.64	3.71	2.54	3.41	2.99	-3.69	0.112	0.000206	Soluble	-4.29	0.0277	5.1e-05	Moderately soluble	-6.11	0.000419	7.71e-07	Poorly soluble	Low	No	Yes	No	No	No	Yes	Yes	-8.45	1	3	2	1	0	0.55	0	1	2	5.19
DCM110932	O=C(N[C@H]1CCC(=O)N(CC1)CC[C@@H](c1ccccc1)Sc1ccccc1)OCc1ccccc1	C29H32N2O3S	488.64	35	18	0.31	11	3	1	144.58	83.94	4.41	5.52	5.36	4.29	5.16	4.95	-6	0.000487	9.96e-07	Poorly soluble	-7.04	4.44e-05	9.08e-08	Poorly soluble	-9.04	4.45e-07	9.1e-10	Poorly soluble	High	No	Yes	No	Yes	Yes	Yes	Yes	-5.36	1	2	1	0	1	0.55	0	0	3	4.51
DCM111002	O=C(/C=C/1\[C@@H](O)NCCN1Cc1ccc(cc1Cl)F)NCCc1nc(C)cc(n1)C	C21H25ClFN5O2	433.91	30	12	0.38	7	6	3	119.94	90.38	3	1.8	1.36	1.44	3.54	2.23	-3.5	0.138	0.000318	Soluble	-3.32	0.209	0.000482	Soluble	-6.67	9.34e-05	2.15e-07	Poorly soluble	High	No	Yes	No	No	No	Yes	Yes	-7.67	0	0	0	0	0	0.55	0	1	1	3.88
DCM111131	O=C([C@@H]1CCC(=O)N(C1)Cc1ccc(cc1)Cl)NC1(CC1)c1ccccc1	C22H23ClN2O2	382.88	27	12	0.36	6	2	1	109.84	49.41	3.16	3.03	3.18	3.32	4.41	3.42	-4.06	0.0337	8.8e-05	Moderately soluble	-3.73	0.0708	0.000185	Soluble	-7.07	3.24e-05	8.45e-08	Poorly soluble	High	Yes	Yes	No	Yes	Yes	Yes	Yes	-6.48	0	0	0	0	0	0.55	0	0	1	2.77
DCM111646	CCC/C(=C\C(=O)/N=C(/Cc1ccccc1)\CO)/[C@@H](N1CCC[C@H]1CO[C@@H](/C(=C\C(=O)OC(C)(C)C)/CC=C)O)O	C32H46N2O7	570.72	41	6	0.53	18	9	3	164.64	128.89	4.78	4.6	3.5	2.38	5.7	4.19	-5.2	0.00363	6.36e-06	Moderately soluble	-7.03	5.31e-05	9.3e-08	Poorly soluble	-4.84	0.00817	1.43e-05	Moderately soluble	High	No	Yes	No	No	No	No	No	-6.52	1	3	1	0	1	0.55	0	4	3	6.09
DCM111656	OC/C(=N\C(=O)/C=C/1\CCCC/C(=C/[C@@H](OC(C)(C)C)O)/C(=O)OC[C@H](N[C@H]1O)C)/Cc1ccccc1	C28H40N2O7	516.63	37	6	0.54	8	9	4	145.79	137.68	3.21	2.1	2.21	1.69	3.83	2.61	-3.96	0.0569	0.00011	Soluble	-4.62	0.0123	2.39e-05	Moderately soluble	-4.78	0.00865	1.67e-05	Moderately soluble	High	No	Yes	No	No	No	No	No	-7.96	1	3	0	1	0	0.55	0	3	2	6.02
DCM111680	COc1ccc(cc1)NC(=O)N(C[C@@H]1Oc2c(cccc2C(=O)N(C[C@@H]1C)[C@@H](CO)C)NC(=O)Cc1ccccc1)C	C32H38N4O6	574.67	42	18	0.34	12	6	3	165.05	120.44	4.35	3.36	3.5	2.32	3.04	3.31	-5.04	0.00518	9.02e-06	Moderately soluble	-5.57	0.00156	2.71e-06	Moderately soluble	-8.09	4.66e-06	8.11e-09	Poorly soluble	High	No	Yes	No	No	No	Yes	Yes	-7.42	1	3	1	0	0	0.55	0	0	2	5.16
DCM111688	OC[C@@H](N1C[C@@H](C)[C@@H](CN(C(=O)Nc2ccc(cc2)C(F)(F)F)C)Oc2c(C1=O)cccc2NC(=O)Cc1ccccc1)C	C32H35F3N4O5	612.64	44	18	0.34	12	8	3	163.56	111.21	3.29	4.28	5.66	3.37	4.07	4.13	-5.85	0.000874	1.43e-06	Moderately soluble	-6.33	0.000288	4.7e-07	Poorly soluble	-8.8	9.73e-07	1.59e-09	Poorly soluble	Low	No	Yes	No	No	No	Yes	Yes	-7	1	4	1	0	1	0.55	0	0	3	5.15
DCM111689	OC[C@H](N1C[C@H](C)[C@@H](CN(C(=O)Nc2ccc3c(c2)OCO3)C)Oc2c(C1=O)cccc2NC(=O)Cc1ccccc1)C	C32H36N4O7	588.65	43	18	0.34	11	7	3	164.62	129.67	3.67	3.2	3.22	1.97	2.79	2.97	-5.09	0.00479	8.14e-06	Moderately soluble	-5.59	0.0015	2.54e-06	Moderately soluble	-7.7	1.18e-05	2e-08	Poorly soluble	High	No	Yes	No	No	Yes	Yes	Yes	-7.62	2	3	1	0	0	0.17	0	0	2	5.36
DCM111691	OC[C@H](N1C[C@@H](C)[C@@H](CN(C(=O)Nc2ccc(cc2)OC)C)Oc2c(C1=O)cc(cc2)NC(=O)NC(C)C)C	C28H39N5O6	541.64	39	12	0.46	12	6	4	153.36	132.47	3.54	2.4	2.85	1.82	1.45	2.41	-4.15	0.0387	7.15e-05	Moderately soluble	-4.82	0.00813	1.5e-05	Moderately soluble	-6.08	0.000445	8.22e-07	Poorly soluble	High	No	Yes	No	No	No	No	Yes	-7.9	2	3	1	1	0	0.17	0	0	2	4.95
DCM111724	OC[C@H](N1C[C@@H](C)[C@H](OCCCC[C@@H](Oc2c(C1=O)cc(cc2)NC(=O)NC(C)C)C)CN(Cc1ccccc1)C)C	C33H50N4O5	582.77	42	12	0.58	10	6	3	171.87	103.37	4.34	4.43	4.42	2.63	3.5	3.86	-5.8	0.000933	1.6e-06	Moderately soluble	-6.32	0.00028	4.8e-07	Poorly soluble	-7.6	1.46e-05	2.5e-08	Poorly soluble	High	No	Yes	No	No	No	No	Yes	-6.71	1	3	0	0	0	0.55	0	0	3	6.18
DCM111767	COc1ccc2c(c1)c1CCN3[C@](c1[nH]2)(CC)[C@@H](C/C(=C\C(=O)NCCc1ccccn1)/[C@@H]3O)C(=O)N1CCN(CC1)C(=O)C1CC1	C36H44N6O5	640.77	47	15	0.5	11	7	3	189.09	131.1	4	1.47	1.43	1.08	3.77	2.35	-4.25	0.0361	5.64e-05	Moderately soluble	-3.83	0.0948	0.000148	Soluble	-7.34	2.96e-05	4.61e-08	Poorly soluble	High	No	Yes	No	No	No	No	Yes	-9.17	2	3	1	0	1	0.17	0	1	2	5.87
DCM111769	COc1ccc2c(c1)c1CCN3[C@](c1[nH]2)(CC)[C@@H](C/C(=C\C(=O)NCc1ccco1)/[C@@H]3O)C(=O)N1CCN(CC1)C(=O)c1ccco1	C35H39N5O7	641.71	47	19	0.4	10	8	3	183.43	144.49	3.94	1.74	1.99	0.27	3.28	2.24	-4.55	0.0179	2.79e-05	Moderately soluble	-4.39	0.0261	4.06e-05	Moderately soluble	-7.65	1.44e-05	2.25e-08	Poorly soluble	Low	No	Yes	No	No	Yes	No	Yes	-8.98	2	3	1	1	1	0.17	0	1	2	5.77
DCM111793	O=C([C@H](N(C(=O)OC(C)(C)C)C)Cc1ccccc1)N[C@H]1CCCCNC1=O	C21H31N3O4	389.49	28	6	0.57	9	4	2	111.12	87.74	3.08	2.67	1.87	1.55	2.14	2.26	-3.5	0.123	0.000315	Soluble	-4.16	0.0267	6.85e-05	Moderately soluble	-4.78	0.00643	1.65e-05	Moderately soluble	High	No	Yes	No	No	No	No	Yes	-6.78	0	0	0	0	0	0.55	0	0	2	3.77
DCM11183	OC/C(=N\C(=O)/C=C\1/CCCC[C@@H](Cc2ccc(cc2)F)C(=O)OC[C@H](N[C@@H]1O)C)/Cc1ccccc1	C29H35FN2O5	510.6	37	12	0.41	7	8	3	144.39	108.22	2.98	3.67	3.57	3.26	5.13	3.72	-5.1	0.0041	8.02e-06	Moderately soluble	-5.63	0.00119	2.33e-06	Moderately soluble	-7.3	2.56e-05	5.02e-08	Poorly soluble	High	No	Yes	No	No	No	No	Yes	-6.81	1	3	0	0	0	0.55	0	2	2	5.66
DCM111831	CC(C[C@H](N1C[C@H](CC(C)C)N(C(=O)C1=O)CC1CCCCC1)CN1CCC[C@@H]1CN1[C@@H](CNC(=O)C1=O)Cc1ccccc1)C	C37H57N5O4	635.88	46	6	0.73	13	5	1	201.92	93.27	4.1	6.86	2.2	2.62	4.85	4.12	-7.34	2.89e-05	4.54e-08	Poorly soluble	-8.63	1.5e-06	2.35e-09	Poorly soluble	-7.19	4.07e-05	6.4e-08	Poorly soluble	High	No	Yes	No	No	No	No	Yes	-5.31	1	3	1	0	2	0.55	0	1	3	5.57
DCM11184	OC/C(=N\C(=O)/C=C\1/CCCCCC(=O)OC[C@H]2N([C@H]1O)CCC2)/Cc1ccccc1	C24H32N2O5	428.52	31	6	0.54	5	7	2	122.73	99.43	2.58	2.17	2.02	2.11	3.16	2.41	-3.68	0.0901	0.00021	Soluble	-3.89	0.0551	0.000129	Soluble	-4.14	0.0308	7.19e-05	Moderately soluble	High	No	Yes	No	No	No	No	No	-7.37	0	0	0	0	0	0.55	0	2	1	5.31
DCM11186	OC/C(=N\C(=O)/C=C/1\CCCC/C(=C/C(=O)OC(C)(C)C)/[C@@H](OC[C@H]2N([C@@H]1O)CCC2)O)/Cc1ccccc1	C30H42N2O7	542.66	39	6	0.57	8	9	3	153.38	128.89	3.2	2.3	2.69	2.07	3.6	2.77	-4.24	0.0313	5.76e-05	Moderately soluble	-4.64	0.0123	2.27e-05	Moderately soluble	-4.25	0.0303	5.58e-05	Moderately soluble	High	No	Yes	No	No	No	No	No	-7.98	1	3	0	0	0	0.55	0	2	2	6.39
DCM111879	CCCCCCN1C[C@@H]([C@H](C[C@H]1c1ccc(cc1)OC)O)n1nnc(c1)COC(=O)c1ccccc1	C28H36N4O4	492.61	36	17	0.46	12	7	1	141.96	89.71	4.92	4.42	3.72	2.89	3.63	3.91	-5.24	0.00286	5.8e-06	Moderately soluble	-6.02	0.000469	9.51e-07	Poorly soluble	-6.99	5.02e-05	1.02e-07	Poorly soluble	High	No	Yes	No	Yes	Yes	Yes	Yes	-6.17	0	3	1	0	0	0.55	0	0	3	4.88
DCM111886	O=C(Cc1cc([C@H](N(C)C)O)c(n(c1=O)Cc1ccccc1)C)NCCc1ccccn1	C25H30N4O3	434.53	32	18	0.32	10	5	2	124.73	87.46	2.8	1.24	1.73	1.88	3.56	2.24	-3.07	0.369	0.000848	Soluble	-2.67	0.919	0.00212	Soluble	-7.25	2.44e-05	5.62e-08	Poorly soluble	High	No	Yes	No	No	No	Yes	Yes	-8.07	0	0	0	0	0	0.55	0	1	2	3.99
DCM111921	OC[C@@H](N1C[C@H](C)[C@H](CN(C(=O)NC2CCCCC2)C)Oc2c(C1=O)cc(cn2)c1ccccc1F)C	C28H37FN4O4	512.62	37	12	0.54	8	6	2	143.65	95	3.66	3.86	4.12	2.96	3.3	3.58	-5.16	0.00353	6.89e-06	Moderately soluble	-5.55	0.00144	2.81e-06	Moderately soluble	-6.46	0.000178	3.47e-07	Poorly soluble	High	No	Yes	No	No	No	Yes	Yes	-6.69	1	3	0	0	0	0.55	0	0	3	5.03
DCM11194	OC/C(=N\C(=O)/C=C/1\CCCCCCCC(=O)OC[C@H]2N([C@@H]1O)CCC2)/Cc1ccccc1	C26H36N2O5	456.57	33	6	0.58	5	7	2	132.34	99.43	3.18	3.25	2.8	2.52	3.63	3.08	-4.52	0.0137	3e-05	Moderately soluble	-5.01	0.00444	9.73e-06	Moderately soluble	-4.67	0.00969	2.12e-05	Moderately soluble	High	No	Yes	No	No	No	No	Yes	-6.78	0	1	0	0	0	0.55	0	2	1	5.55
DCM111940	OC[C@@H](N1C[C@H](C)[C@@H](OCCCC[C@H](Oc2c(C1=O)cc(cc2)NC(=O)Cc1ccccc1)C)CN(Cc1ccc(cc1)OC)C)C	C38H51N3O6	645.83	47	18	0.47	11	7	2	190.04	100.57	4.78	5.37	5.08	2.76	5.17	4.63	-6.78	0.000106	1.64e-07	Poorly soluble	-7.24	3.75e-05	5.81e-08	Poorly soluble	-9.69	1.32e-07	2.04e-10	Poorly soluble	High	No	Yes	No	Yes	No	No	Yes	-6.43	1	3	1	0	2	0.55	0	0	3	6.37
DCM11198	OC/C(=N\C(=O)/C=C/1\CCCC/C(=N/C(=O)OCC2c3ccccc3c3c2cccc3)/[C@@H](OC[C@H]2N([C@@H]1O)CCC2)O)/Cc1ccccc1	C39H43N3O7	665.77	49	18	0.38	9	10	3	191.44	141.25	5.17	4.46	4.82	3.32	5.51	4.65	-6.46	0.000233	3.5e-07	Poorly soluble	-7.15	4.76e-05	7.15e-08	Poorly soluble	-8.36	2.9e-06	4.36e-09	Poorly soluble	Low	No	Yes	No	No	No	No	No	-7.19	1	3	1	1	1	0.55	0	2	3	7.22
DCM11203	OC[C@H](N1C[C@H](C)[C@@H](CN(C(=O)NC(C)C)C)Oc2c(C1=O)cccc2NC(=O)Cc1ccccc1)C	C28H38N4O5	510.63	37	12	0.46	11	5	3	146.95	111.21	3.61	2.63	2.57	2.01	2.53	2.67	-4.18	0.034	6.66e-05	Moderately soluble	-4.62	0.0124	2.42e-05	Moderately soluble	-6.35	0.00023	4.5e-07	Poorly soluble	High	No	Yes	No	No	No	Yes	Yes	-7.55	1	3	1	0	0	0.55	0	0	2	4.91
DCM11222	OC[C@@H](N1C[C@H](C)[C@@H](CN(C(=O)NC(C)C)C)Oc2c(C1=O)cc(cc2)NC(=O)Nc1ccc(cc1)OC)C	C28H39N5O6	541.64	39	12	0.46	12	6	4	153.36	132.47	3.03	2.4	2.85	1.82	1.45	2.31	-4.15	0.0387	7.15e-05	Moderately soluble	-4.82	0.00813	1.5e-05	Moderately soluble	-6.08	0.000445	8.22e-07	Poorly soluble	High	No	Yes	No	No	No	No	Yes	-7.9	2	3	1	1	0	0.17	0	0	2	4.97
DCM112277	COCCCn1c(C)c(cc(c1=O)CC(=O)NCCCCc1ccccc1)[C@@H](N(C(C)C)C(C)C)O	C29H45N3O4	499.69	36	12	0.59	16	5	2	146.79	83.8	4.52	3.3	3.66	2.9	5.55	3.99	-4.21	0.031	6.2e-05	Moderately soluble	-4.74	0.00919	1.84e-05	Moderately soluble	-7.66	1.11e-05	2.21e-08	Poorly soluble	High	No	Yes	No	No	No	Yes	Yes	-7.01	0	3	1	0	1	0.55	0	1	2	4.68
DCM112282	Oc1ccc(cc1)C[C@@H]1CNC(=O)C(=O)N1C[C@H]1CCCN1C[C@@H](N1C[C@@H](Cc2ccccc2)N(C(=O)C1=O)CCc1ccccc1)Cc1ccccc1	C44H49N5O5	727.89	54	24	0.36	14	6	2	226.64	113.5	3.71	6.63	1.96	2.67	5.41	4.07	-7.93	8.46e-06	1.16e-08	Poorly soluble	-8.81	1.12e-06	1.53e-09	Poorly soluble	-11.36	3.2e-09	4.4e-12	Insoluble	High	No	Yes	No	Yes	Yes	Yes	Yes	-6.03	1	3	1	0	2	0.55	0	1	3	5.49
DCM11256	OC[C@@H](N1C[C@H](C)[C@@H](OCCCC[C@H](Oc2c(C1=O)cc(cc2)NC(=O)NC1CCCCC1)C)CN(C(=O)c1ccccc1)C)C	C36H52N4O6	636.82	46	12	0.58	10	6	3	184.6	120.44	4.28	5.06	5.14	3	3.54	4.2	-6.51	0.000197	3.1e-07	Poorly soluble	-7.33	2.97e-05	4.66e-08	Poorly soluble	-7.69	1.31e-05	2.06e-08	Poorly soluble	Low	No	Yes	No	No	No	No	Yes	-6.59	1	3	0	0	2	0.55	0	0	3	6.47
DCM11292	COc1ccc2c(c1)c1CCN3[C@](c1[nH]2)(CCC1CCCC1)[C@@H](C/C(=C\C(=O)NCc1ccc(c(c1)OC)OC)/[C@H]3O)C(=O)N1CCOCC1	C39H50N4O7	686.84	50	15	0.54	12	8	3	198.36	125.59	4.99	3.9	3.64	1.81	5.39	3.94	-5.99	0.00071	1.03e-06	Moderately soluble	-6.24	0.000399	5.81e-07	Poorly soluble	-8.52	2.06e-06	2.99e-09	Poorly soluble	High	No	Yes	No	No	No	No	Yes	-7.72	2	3	1	0	1	0.17	0	1	3	6.28
DCM11349	O=C(NCc1ccc(cc1)F)CCC1CCN(CC1)C(=O)c1ccccc1C(=O)C	C24H27FN2O3	410.48	30	12	0.38	9	4	1	117.43	66.48	2.78	3.01	3.86	2.99	4.73	3.48	-3.98	0.0427	0.000104	Soluble	-4.07	0.0349	8.5e-05	Moderately soluble	-7.1	3.27e-05	7.96e-08	Poorly soluble	High	Yes	Yes	No	Yes	Yes	Yes	Yes	-6.67	0	0	0	0	0	0.55	0	0	2	3.05
DCM11404	O[C@H]1C[C@@H](c2ccc(cc2)C)N(C[C@@H]1n1nnc(c1)COC(=O)c1ccccc1)C(=O)C1CCCCC1	C29H34N4O4	502.6	37	17	0.45	8	6	1	143.33	97.55	4.08	4.02	3.54	3.15	3.15	3.59	-5.3	0.00251	5e-06	Moderately soluble	-5.77	0.000851	1.69e-06	Moderately soluble	-6.21	0.000307	6.11e-07	Poorly soluble	High	No	Yes	No	No	Yes	Yes	Yes	-6.51	1	3	0	0	0	0.55	0	0	3	4.87
DCM11416	CCN([C@H](c1cc(CC(=O)NCCc2ccccn2)c(=O)n(c1C)Cc1ccc(cc1)C(C)(C)C)O)CC	C31H42N4O3	518.69	38	18	0.45	13	5	2	153.61	87.46	3.6	3.64	3.81	3.06	5.84	3.99	-4.84	0.00747	1.44e-05	Moderately soluble	-5.17	0.00355	6.84e-06	Moderately soluble	-9.18	3.43e-07	6.62e-10	Poorly soluble	High	No	Yes	No	No	No	Yes	Yes	-6.88	1	3	1	0	0	0.55	0	1	3	4.72
DCM11434	OC[C@@H](N1C[C@@H](C)[C@H](OCc2c(c3c(C1=O)n(C)c1c3cccc1)cccc2)CN(C(=O)NC1CCCCC1)C)C	C33H44N4O4	560.73	41	15	0.52	7	4	2	167.02	87.04	4.03	4.59	4.64	2.99	3.46	3.94	-6.02	0.000539	9.62e-07	Poorly soluble	-6.14	0.000404	7.21e-07	Poorly soluble	-7.22	3.36e-05	6e-08	Poorly soluble	High	No	Yes	No	No	No	No	Yes	-6.46	1	3	0	0	0	0.55	0	0	2	5.85
DCM11470	CCN([C@H](c1cc(CC(=O)NCC2CCCCC2)c(=O)n(c1C)Cc1ccccc1)O)CC	C27H39N3O3	453.62	33	12	0.56	11	4	2	133.98	74.57	3.86	3.42	3.45	3.31	4.64	3.74	-4.35	0.0203	4.47e-05	Moderately soluble	-4.67	0.00979	2.16e-05	Moderately soluble	-6.93	5.35e-05	1.18e-07	Poorly soluble	High	Yes	Yes	No	No	No	Yes	Yes	-6.64	0	2	1	0	0	0.55	0	1	2	4.34
DCM11492	O[C@H](c1cc(CC(=O)NC(c2ccccc2)c2ccccc2)c(=O)n(c1C)Cc1ccc(cc1)C(C)(C)C)N(C)C	C35H41N3O3	551.72	41	24	0.31	11	4	2	165.88	74.57	5.05	5.18	4.85	4.39	6.49	5.19	-6.23	0.000324	5.87e-07	Poorly soluble	-6.49	0.000178	3.22e-07	Poorly soluble	-10.46	1.92e-08	3.48e-11	Insoluble	High	No	Yes	No	Yes	No	Yes	Yes	-5.99	2	3	1	0	1	0.17	0	1	3	5.04
DCM115688	O=C(N1CCCC1)CN1C(=O)N[C@@](C1=O)(C)c1ccc(cc1)Cl	C16H18ClN3O3	335.79	23	6	0.44	4	3	1	96.66	69.72	2.62	1.67	0.48	1.69	1.99	1.69	-2.9	0.42	0.00125	Soluble	-2.75	0.599	0.00179	Soluble	-4.15	0.0236	7.01e-05	Moderately soluble	High	No	No	No	Yes	No	No	No	-7.16	0	0	0	0	0	0.55	0	1	0	2.79
DCM116004	COc1ccc(cc1OC)[C@@H](N([C@H](/C=N/C(=O)c1ccco1)O)Cc1ccccc1)C(=O)NC[C@@H]1CCCO1	C29H33N3O7	535.59	39	17	0.34	14	9	2	143.84	122.83	4.03	3.24	2.89	0.85	4.02	3	-4.6	0.0134	2.51e-05	Moderately soluble	-5.49	0.00172	3.22e-06	Moderately soluble	-7.01	5.23e-05	9.77e-08	Poorly soluble	High	No	Yes	No	Yes	Yes	Yes	Yes	-7.27	1	3	1	0	0	0.55	0	2	2	5.2
DCM116068	CC(=O)N[C@H](C(=O)NC1CCN(CC1)S(=O)(=O)c1ccccc1)Cc1ccc(cc1)F	C22H26FN3O4S	447.52	31	12	0.36	9	6	2	117.94	103.96	2.65	2.38	2.96	1.7	2.16	2.37	-3.81	0.0699	0.000156	Soluble	-4.2	0.028	6.25e-05	Moderately soluble	-6.33	0.000208	4.66e-07	Poorly soluble	High	No	Yes	No	No	No	Yes	Yes	-7.34	0	0	0	0	0	0.55	0	0	2	3.9
DCM116147	COc1ccc(cc1)Cn1c(=O)[nH]c2c(c1=O)ccc(c2)C(=O)NCCCN1CCCC1	C24H28N4O4	436.5	32	16	0.38	9	5	2	127.6	96.43	3.45	2.25	1.58	2.06	3.69	2.61	-3.74	0.0795	0.000182	Soluble	-3.91	0.0536	0.000123	Soluble	-6.92	5.3e-05	1.21e-07	Poorly soluble	High	No	Yes	No	Yes	Yes	Yes	Yes	-7.37	0	0	0	0	0	0.55	0	0	2	2.99
DCM116339	O=C(CN1C(=O)N[C@](C1=O)(C)c1cccc(c1)Br)NC1CCCCC1	C18H22BrN3O3	408.29	25	6	0.5	5	3	2	104.96	78.51	3.22	2.87	1.79	2.28	2.59	2.55	-4.03	0.0384	9.4e-05	Moderately soluble	-4.18	0.0271	6.64e-05	Moderately soluble	-5.38	0.00171	4.2e-06	Moderately soluble	High	No	Yes	No	Yes	Yes	No	Yes	-6.75	0	0	0	0	0	0.55	0	1	1	3.18
DCM116476	C[C@@H](NC(=O)c1cc(ccc1C)S(=O)(=O)N1CCOCC1)CCc1ccccc1	C22H28N2O4S	416.53	29	12	0.41	8	5	1	116.61	84.09	3.17	3.08	3.47	2.06	3.26	3.01	-4.14	0.0301	7.23e-05	Moderately soluble	-4.51	0.0128	3.07e-05	Moderately soluble	-6.57	0.000113	2.72e-07	Poorly soluble	High	No	Yes	No	Yes	Yes	Yes	Yes	-6.65	0	0	0	0	0	0.55	0	0	2	3.58
DCM116718	CCCCCNC(=O)c1ccc2c(c1)[nH]c(=S)n(c2=O)C[C@H]1CCCO1	C19H25N3O3S	375.49	26	10	0.53	8	3	2	105.08	108.21	3.11	2.7	3.16	2.1	4.87	3.19	-3.63	0.0889	0.000237	Soluble	-4.63	0.0089	2.37e-05	Moderately soluble	-5.49	0.00121	3.21e-06	Moderately soluble	High	No	Yes	Yes	Yes	Yes	No	Yes	-6.67	0	0	0	0	0	0.55	0	1	2	3.52
DCM116923	COCCNC(=O)c1ccc2c(c1)[nH]c(=S)n(c2=O)CCCN1CCCC1=O	C19H24N4O4S	404.48	28	10	0.47	9	4	2	112.09	128.52	2.98	0.28	1.07	0.84	3.65	1.76	-2.19	2.58	0.00639	Soluble	-2.54	1.16	0.00288	Soluble	-4.92	0.00481	1.19e-05	Moderately soluble	High	No	Yes	No	No	No	No	No	-8.57	0	0	0	0	0	0.55	0	1	2	2.99
DCM117144	CCOc1cc(ccc1OCC)[C@H](NC(=O)c1cc(O)nc2c1cccc2)C	C22H24N2O4	380.44	28	16	0.27	8	5	2	108.65	80.68	3.49	4.02	3.9	2.42	4.08	3.58	-4.63	0.009	2.37e-05	Moderately soluble	-5.42	0.00146	3.83e-06	Moderately soluble	-7.08	3.15e-05	8.28e-08	Poorly soluble	High	No	No	Yes	Yes	Yes	Yes	Yes	-5.77	0	0	0	0	0	0.55	0	0	3	3.11
DCM117957	CSCC[C@H](C(=O)O)NC(=O)C1CCN(CC1)[C@H](C(=N)Cc1ccccc1)O	C20H29N3O4S	407.53	28	6	0.55	11	6	4	115.71	139.02	2.13	-0.73	1.22	0.92	2.16	1.14	-1.34	18.7	0.0458	Very soluble	-1.71	7.89	0.0194	Very soluble	-3.51	0.127	0.00031	Soluble	High	No	Yes	No	No	No	No	No	-9.3	0	0	1	1	0	0.55	0	1	2	4.07
DCM118111	COc1ccc(cc1)C(=O)N[C@@H](C(=O)NCCCSc1ccccc1)C(C)C	C22H28N2O3S	400.53	28	12	0.36	12	3	2	113.82	92.73	3.91	4.45	3.75	3.2	4.29	3.92	-4.65	0.00893	2.23e-05	Moderately soluble	-6.12	0.000306	7.65e-07	Poorly soluble	-7.16	2.76e-05	6.9e-08	Poorly soluble	High	No	Yes	Yes	Yes	Yes	Yes	Yes	-5.58	0	0	1	0	0	0.55	0	0	3	3.24
DCM11820	O=C(Cc1cc([C@@H](N(C(C)C)C(C)C)O)c(n(c1=O)CCCN1CCCC1=O)C)NCCc1ccccn1	C29H43N5O4	525.68	38	12	0.59	14	6	2	153.21	107.77	3.49	1.26	1.87	1.67	4.12	2.48	-3.2	0.33	0.000627	Soluble	-3.12	0.397	0.000755	Soluble	-6.65	0.000118	2.24e-07	Poorly soluble	High	No	Yes	No	No	No	Yes	Yes	-8.61	1	3	1	0	0	0.55	0	1	2	4.83
DCM118269	COc1cccc(c1)CC(=O)NN1C(=O)NC2(C1=O)CCCCC2	C17H21N3O4	331.37	24	6	0.47	5	4	2	94.29	87.74	2.13	1.81	0.76	1.3	1.39	1.48	-2.89	0.427	0.00129	Soluble	-3.27	0.177	0.000535	Soluble	-4.28	0.0176	5.31e-05	Moderately soluble	High	No	Yes	No	No	No	No	No	-7.04	0	0	0	0	0	0.55	0	1	0	3.43
DCM118920	COC[C@@H](NC(=O)Cn1c(SCc2ccccc2)nc2c1cccc2)C	C20H23N3O2S	369.48	26	15	0.3	9	3	1	105.32	81.45	3.66	3.51	3.33	2.29	3.44	3.25	-4.18	0.0247	6.68e-05	Moderately soluble	-4.9	0.00461	1.25e-05	Moderately soluble	-6.44	0.000135	3.65e-07	Poorly soluble	High	No	No	Yes	Yes	Yes	Yes	Yes	-6.06	0	0	0	0	0	0.55	0	0	3	3.49
DCM119142	C[C@H](C(=O)N[C@@H](c1ccccc1)C(=O)O)NC(=O)C1(CCN(CC1)C(=O)OC(C)(C)C)c1ccccc1	C28H35N3O6	509.59	37	12	0.43	12	6	3	142.07	125.04	3.08	3.4	2.7	1.94	2.98	2.82	-4.59	0.0131	2.57e-05	Moderately soluble	-5.71	0.001	1.97e-06	Moderately soluble	-6.2	0.000325	6.37e-07	Poorly soluble	High	No	Yes	No	No	No	No	Yes	-6.99	1	3	1	0	0	0.56	0	0	2	4.27
DCM119143	NC(=O)/C=C\[C@@H](C(O)O)NC(=O)[C@@H]1CC[C@H](CC1)CNC(=O)[C@@H](Cc1ccccc1)NC(=O)OC(C)(C)C	C27H40N4O7	532.63	38	6	0.56	16	7	6	140.71	180.08	2.43	1.01	0.88	0.36	1.62	1.26	-2.84	0.771	0.00145	Soluble	-4.38	0.0222	4.16e-05	Moderately soluble	-3.82	0.0799	0.00015	Soluble	Low	No	Yes	No	No	No	No	No	-8.83	3	3	2	1	3	0.17	0	2	2	5.24
DCM119144	CC[C@H]([C@H](C(=O)NC[C@@H]1CC[C@H](CC1)C(=O)O)NC(=O)[C@@H](n1c(=O)[nH]c2c(c1=O)cccc2)Cc1ccccc1)C	C31H38N4O6	562.66	41	16	0.45	13	6	4	157.15	150.36	3.12	4.02	3.01	2.44	4.23	3.37	-5.29	0.00287	5.11e-06	Moderately soluble	-6.88	7.41e-05	1.32e-07	Poorly soluble	-7.3	2.85e-05	5.06e-08	Poorly soluble	Low	No	Yes	No	No	Yes	No	Yes	-6.88	1	3	2	1	1	0.11	0	0	3	5.16
DCM119341	CC([C@H](C(=O)NC1CCCC1)NC(=O)[C@@H]1Cc2ccccc2CN1C(=O)OC(C)(C)C)C	C25H37N3O4	443.58	32	6	0.64	10	4	2	128.39	87.74	3.76	4	3.02	2.4	3.15	3.26	-4.59	0.0114	2.58e-05	Moderately soluble	-5.54	0.00127	2.85e-06	Moderately soluble	-5.14	0.00318	7.18e-06	Moderately soluble	High	No	Yes	No	No	Yes	Yes	Yes	-6.17	0	0	0	0	0	0.55	0	0	3	4.28
DCM119353	CC(=O)Nc1ccc(cc1)S(=O)(=O)N1CCC(CC1)C(=O)N[C@H](C(=O)O)Cc1ccccc1	C23H27N3O6S	473.54	33	12	0.35	10	7	3	126.26	141.26	2.37	1.6	2.37	0.98	1.22	1.71	-3.39	0.192	0.000405	Soluble	-4.18	0.0314	6.64e-05	Moderately soluble	-5.4	0.00189	3.99e-06	Moderately soluble	Low	No	Yes	No	No	No	No	No	-8.05	0	0	1	1	0	0.56	0	0	2	3.85
DCM119745	C[C@@H](NC(=O)/C=C/[C@@H](N1CCC(CC1)C(=O)N)O)CCc1ccccc1	C20H29N3O3	359.46	26	6	0.5	9	4	3	105.19	95.66	2.72	1.4	0.81	1.31	1.94	1.64	-2.53	1.07	0.00297	Soluble	-3.01	0.349	0.000971	Soluble	-3.24	0.205	0.00057	Soluble	High	No	Yes	No	No	No	No	No	-7.5	0	0	0	0	0	0.55	0	1	2	3.72
DCM119973	CCOc1ccc(cc1)CN1CCNC(=O)/C/1=C/[C@@H](NCc1csc(n1)C(C)C)O	C22H30N4O3S	430.56	30	11	0.45	9	5	3	126.2	114.96	3.74	2.48	1.52	0.7	4.08	2.5	-3.75	0.0767	0.000178	Soluble	-4.54	0.0125	2.89e-05	Moderately soluble	-5.81	0.000664	1.54e-06	Moderately soluble	High	No	Yes	No	No	No	Yes	No	-7.17	0	0	0	0	0	0.55	0	2	2	4.22
DCM119988	O=C([C@@H]1CCCN(C1)C(=O)NCc1ccccc1)NCc1ccc(cc1)F	C21H24FN3O2	369.43	27	12	0.33	8	3	2	105.4	61.44	3.46	2.41	2.8	2.97	3.08	2.94	-3.45	0.131	0.000355	Soluble	-3.34	0.168	0.000455	Soluble	-6.44	0.000133	3.6e-07	Poorly soluble	High	Yes	Yes	No	Yes	No	Yes	Yes	-6.84	0	0	0	0	0	0.55	0	0	2	3.02
DCM120016	CCc1noc(c1)CNC(=O)[C@H]1CCC(=O)N(C1)Cc1cccc(c1)F	C19H22FN3O3	359.39	26	11	0.42	7	5	1	97.23	75.44	2.87	1.48	2.17	1.75	3.35	2.32	-2.85	0.506	0.00141	Soluble	-2.67	0.766	0.00213	Soluble	-5.97	0.000382	1.06e-06	Moderately soluble	High	Yes	Yes	No	Yes	No	Yes	Yes	-7.44	0	0	0	0	0	0.55	0	0	1	3.49
DCM120026	OC[C@H]([C@H]([C@@H]1C[C@H]1C(=O)N1CCCC1)O)NC(=O)[C@@H](Cc1ccccc1)NC(=O)OC(C)(C)C	C25H37N3O6	475.58	34	6	0.64	14	6	4	130.56	128.2	3.33	1.37	0.84	0.83	2.08	1.69	-2.86	0.659	0.00139	Soluble	-3.67	0.103	0.000216	Soluble	-3.77	0.0815	0.000171	Soluble	High	No	Yes	No	No	No	No	No	-8.23	0	2	1	0	0	0.55	0	0	2	4.83
DCM120044	O=C(N[C@H]1CCN(C(=O)CC1)[C@H](Cc1ccccc1)CSc1ccc(cc1)C)OCc1ccccc1	C30H34N2O3S	502.67	36	18	0.33	11	3	1	149.55	83.94	4.05	6.02	5.47	4.49	5.7	5.15	-6.39	0.000203	4.04e-07	Poorly soluble	-7.56	1.38e-05	2.75e-08	Poorly soluble	-9.41	1.94e-07	3.86e-10	Poorly soluble	High	No	Yes	No	Yes	Yes	Yes	Yes	-5.09	2	2	1	0	1	0.17	0	0	3	4.67
DCM120505	COc1ccc(cc1COc1ccc(cc1)NC(=O)C)[C@@H]1Nc2cccc(c2C(=O)N1Cc1ccccc1)O	C31H29N3O5	523.58	39	24	0.16	9	5	3	156.35	100.13	3.83	5.07	3.93	3	4.34	4.04	-6.14	0.000378	7.22e-07	Poorly soluble	-6.92	6.37e-05	1.22e-07	Poorly soluble	-9.83	7.74e-08	1.48e-10	Poorly soluble	High	No	Yes	No	Yes	Yes	Yes	Yes	-5.89	1	2	0	0	1	0.55	0	0	3	4.31
DCM120617	OC/C(=N\C(=O)/C=C/1\CCCCC[C@H](C(=O)OC[C@H]2N([C@H]1O)CCC2)Cc1ccc(cc1)F)/Cc1ccccc1	C32H39FN2O5	550.66	40	12	0.47	7	8	2	156.79	99.43	4.36	4.8	4.44	3.82	5.39	4.56	-6.04	0.000504	9.16e-07	Poorly soluble	-6.62	0.000132	2.4e-07	Poorly soluble	-7.26	3.05e-05	5.53e-08	Poorly soluble	High	No	Yes	No	No	No	No	Yes	-6.25	1	3	0	0	0	0.55	0	2	2	6.1
DCM120619	OC/C(=N\C(=O)/C=C/1\CCCC/C(=C/C(=O)OC(C)(C)C)/[C@H](OC[C@@H]2N([C@@H]1O)CCC2)O)/Cc1ccccc1	C30H42N2O7	542.66	39	6	0.57	8	9	3	153.38	128.89	3.06	2.3	2.69	2.07	3.6	2.75	-4.24	0.0313	5.76e-05	Moderately soluble	-4.64	0.0123	2.27e-05	Moderately soluble	-4.25	0.0303	5.58e-05	Moderately soluble	High	No	Yes	No	No	No	No	No	-7.98	1	3	0	0	0	0.55	0	2	2	6.39
DCM120625	OC/C(=N\C(=O)/C=C/1\CCCC/C(=N/C(=O)OCC2c3ccccc3c3c2cccc3)/[C@H](OC[C@@H]2N([C@@H]1O)CCC2)O)/Cc1ccccc1	C39H43N3O7	665.77	49	18	0.38	9	10	3	191.44	141.25	4.98	4.46	4.82	3.32	5.51	4.62	-6.46	0.000233	3.5e-07	Poorly soluble	-7.15	4.76e-05	7.15e-08	Poorly soluble	-8.36	2.9e-06	4.36e-09	Poorly soluble	Low	No	Yes	No	No	No	No	No	-7.19	1	3	1	1	1	0.55	0	2	3	7.22
DCM120642	OC[C@@H](N1C[C@@H](C)[C@@H](CN(C(=O)Nc2ccccc2)C)Oc2c(C1=O)cc(cc2)NC(=O)Cc1ccccc1)C	C31H36N4O5	544.64	40	18	0.32	11	5	3	158.55	111.21	3.9	3.39	3.49	2.64	2.94	3.27	-4.96	0.00598	1.1e-05	Moderately soluble	-5.4	0.00215	3.94e-06	Moderately soluble	-8	5.43e-06	9.98e-09	Poorly soluble	High	No	Yes	No	Yes	No	Yes	Yes	-7.22	1	3	1	0	0	0.55	0	0	2	4.87
DCM120705	OC[C@@H](N1C[C@H](C)[C@H](OCCCC[C@H](Oc2c(C1=O)cc(cc2)NC(=O)CCC(F)(F)F)C)CN(Cc1ccc(cc1)C(=O)O)C)C	C34H46F3N3O7	665.74	47	12	0.56	12	11	3	175.83	128.64	3.78	2.45	6.13	2.51	4.54	3.88	-4.91	0.00823	1.24e-05	Moderately soluble	-4.8	0.0107	1.6e-05	Moderately soluble	-7.68	1.38e-05	2.07e-08	Poorly soluble	Low	No	Yes	No	No	No	No	Yes	-8.62	1	4	1	1	2	0.55	0	0	2	6.18
DCM120792	C[C@H]([C@@H]1[C@@H](C[C@@H]2N(C1=O)CCc1c2cc(cc1)c1ccccc1)N(C(=O)NC1CCCCC1)C)O	C29H37N3O3	475.62	35	12	0.52	6	3	2	142.03	72.88	4	4.51	3.82	3.44	3.23	3.8	-5.49	0.00155	3.25e-06	Moderately soluble	-5.76	0.000823	1.73e-06	Moderately soluble	-6.26	0.000263	5.53e-07	Poorly soluble	High	Yes	Yes	No	No	Yes	Yes	Yes	-6	0	2	0	0	0	0.55	0	0	2	4.84
DCM120854	O[C@H](c1cc(CC(=O)NC2CCCCC2)c(=O)n(c1C)Cc1ccccc1)N(C)C	C24H33N3O3	411.54	30	12	0.5	8	4	2	119.56	74.57	2.75	2.12	2.42	2.7	3.42	2.68	-3.5	0.132	0.00032	Soluble	-3.32	0.198	0.000482	Soluble	-5.75	0.000725	1.76e-06	Moderately soluble	High	Yes	Yes	No	No	No	Yes	No	-7.31	0	0	0	0	0	0.55	0	1	2	3.97
DCM120855	CN(CCCNC(=O)Cc1cc([C@@H](N(C)C)O)c(n(c1=O)Cc1ccccc1)C)C	C23H34N4O3	414.54	30	12	0.48	11	5	2	119.76	77.81	3.57	0.71	1.04	1.69	2.62	1.93	-2.43	1.55	0.00374	Soluble	-1.92	4.96	0.012	Very soluble	-5.64	0.00095	2.29e-06	Moderately soluble	High	No	Yes	No	No	No	No	No	-8.32	0	0	1	0	0	0.55	0	1	2	4.05
DCM120927	COc1ccc(cc1)Cn1c(C)c(cc(c1=O)CC(=O)NC(c1ccccc1)c1ccccc1)[C@H](N(C(C)C)C(C)C)O	C36H43N3O4	581.74	43	24	0.33	13	5	2	172.33	83.8	4.51	5.07	5.12	4.04	6.44	5.04	-6.2	0.000371	6.37e-07	Poorly soluble	-6.57	0.000156	2.68e-07	Poorly soluble	-10.21	3.6e-08	6.18e-11	Insoluble	High	No	Yes	No	Yes	No	Yes	Yes	-6.25	1	3	1	0	1	0.55	0	1	3	5.17
DCM121058	Fc1ccc(c(c1)C)c1n[nH]c(c1)C(=O)NCc1cccc(c1)C(F)(F)F	C19H15F4N3O	377.34	27	17	0.16	6	6	2	91.43	57.78	2.3	4.33	5.89	3.71	5.51	4.35	-4.98	0.00398	1.05e-05	Moderately soluble	-5.26	0.00208	5.52e-06	Moderately soluble	-8.17	2.56e-06	6.79e-09	Poorly soluble	High	No	No	Yes	Yes	No	Yes	Yes	-5.53	0	1	0	1	0	0.55	0	0	2	2.83
DCM121215	O=C(C1CCN(CC1)Cc1ccccc1)N[C@@H](c1cccc2c1cccc2)C	C25H28N2O	372.5	28	16	0.32	6	2	1	119.56	32.34	3.6	4.67	4.07	3.8	4.78	4.19	-5.12	0.00284	7.61e-06	Moderately soluble	-5.08	0.00312	8.39e-06	Moderately soluble	-7.87	5.04e-06	1.35e-08	Poorly soluble	High	Yes	Yes	No	Yes	Yes	Yes	Yes	-5.26	0	0	0	0	0	0.55	0	0	2	2.86
DCM121306	O=C(Cc1cc([C@@H](N(C(C)C)C(C)C)O)c(n(c1=O)Cc1ccccc1)C)NC1CC1	C25H35N3O3	425.56	31	12	0.52	10	4	2	124.36	74.57	3.79	2.47	2.75	2.9	3.96	3.17	-3.66	0.0929	0.000218	Soluble	-3.68	0.0889	0.000209	Soluble	-5.78	0.000714	1.68e-06	Moderately soluble	High	Yes	Yes	No	No	No	Yes	No	-7.14	0	0	0	0	0	0.55	0	1	2	4.11
DCM121309	O=C(Cc1cc([C@@H](N(C(C)C)C(C)C)O)c(n(c1=O)Cc1ccc(cc1)F)C)NC(c1ccccc1)c1ccccc1	C35H40FN3O3	569.71	42	24	0.31	12	5	2	165.8	74.57	4.74	5.2	5.67	4.75	6.78	5.43	-6.28	0.0003	5.26e-07	Poorly soluble	-6.51	0.000175	3.07e-07	Poorly soluble	-10.38	2.4e-08	4.21e-11	Insoluble	High	No	Yes	No	Yes	No	Yes	Yes	-6.08	2	4	1	0	1	0.17	0	1	3	5.07
DCM121905	COc1cc(cc(c1OC)OC)[C@H](N(C(=O)c1cnccn1)Cc1ccccc1)C(=O)NC(C)(C)C	C27H32N4O5	492.57	36	18	0.33	12	7	1	135.45	102.88	3.11	3.01	3.32	0.71	3.74	2.78	-4.37	0.0211	4.28e-05	Moderately soluble	-4.84	0.0072	1.46e-05	Moderately soluble	-7.85	6.97e-06	1.42e-08	Poorly soluble	High	No	Yes	No	Yes	Yes	Yes	Yes	-7.17	0	2	1	0	0	0.55	0	0	2	3.96
DCM122034	CC(C/C(=N\C(=O)OC(C)(C)C)/[C@H](N1CCC(CC1)C(=O)N[C@@H](C(=O)O)Cc1ccccc1)O)C	C26H39N3O6	489.6	35	6	0.62	13	8	3	138.77	128.53	3.85	1.25	2.87	2.18	3.33	2.69	-2.93	0.573	0.00117	Soluble	-3.55	0.139	0.000283	Soluble	-4.25	0.0278	5.68e-05	Moderately soluble	High	No	Yes	No	No	No	No	No	-8.4	0	3	1	0	0	0.55	0	1	2	5.18
DCM122070	CCCc1cc(O)n2c(n1)nc(n2)NCc1ccccc1F	C15H16FN5O	301.32	22	15	0.27	5	5	2	81.14	75.34	2.6	3.18	2.61	2.65	2.06	2.62	-3.89	0.0392	0.00013	Soluble	-4.43	0.0111	3.69e-05	Moderately soluble	-5.2	0.00188	6.25e-06	Moderately soluble	High	Yes	No	Yes	Yes	No	No	No	-5.88	0	0	0	0	0	0.55	0	0	0	2.87
DCM123088	O=C(C1CCN(CC1)C(=O)c1cccc(c1)Cl)NCc1ccc(cc1)C	C21H23ClN2O2	370.87	26	12	0.33	6	2	1	107.64	49.41	3.46	3.64	3.28	3.37	4.21	3.59	-4.38	0.0155	4.19e-05	Moderately soluble	-4.37	0.016	4.3e-05	Moderately soluble	-6.71	7.21e-05	1.95e-07	Poorly soluble	High	Yes	No	No	Yes	Yes	Yes	Yes	-5.98	0	0	0	0	0	0.55	0	0	2	2.66
DCM1231	O=C(c1[nH]cc(c1)C(=O)C)NCc1ccccc1Cl	C14H13ClN2O2	276.72	19	11	0.14	5	2	2	73.48	61.96	2.3	2.13	2.65	1.37	3.51	2.39	-3	0.279	0.00101	Soluble	-3.06	0.24	0.000866	Soluble	-5.48	0.000916	3.31e-06	Moderately soluble	High	Yes	No	Yes	Yes	No	No	No	-6.48	0	0	0	0	0	0.55	0	0	0	2.08
DCM12339	CCC(=O)Nc1nc2n(n1)c(O)cc(n2)c1ccccc1	C14H13N5O2	283.29	21	15	0.14	4	5	2	77.36	92.41	2.02	1.72	1.65	1.53	0.81	1.55	-2.94	0.322	0.00114	Soluble	-3.28	0.15	0.000529	Soluble	-4.07	0.024	8.47e-05	Moderately soluble	High	No	No	Yes	No	No	No	No	-6.81	0	0	0	0	0	0.55	0	0	0	2.7
DCM123458	O=C(NC1CC1)CO[C@H](/C(=N/C(=O)c1ccccc1C)/C(C)C)O	C18H24N2O4	332.39	24	6	0.5	9	5	2	91.69	87.99	2.56	2.3	1.78	1.53	3.13	2.26	-2.94	0.381	0.00115	Soluble	-3.79	0.0544	0.000164	Soluble	-3.84	0.048	0.000145	Soluble	High	No	Yes	No	No	No	No	No	-6.69	0	0	0	0	0	0.55	0	2	1	3.71
DCM123539	CCCNC(=O)CC1=NC(=O)NC(=O)C1	C9H13N3O3	211.22	15	0	0.56	5	4	2	60.78	87.63	1.18	-0.25	-0.78	-0.16	1.19	0.24	-0.66	46	0.218	Very soluble	-1.13	15.6	0.0738	Very soluble	-2.46	0.731	0.00346	Soluble	High	No	No	No	No	No	No	No	-7.77	0	1	0	0	0	0.55	0	0	1	3.07
DCM123762	O=C(NCc1ccc2c(c1)OCO2)CO[C@H](/C(=N/C(=O)c1ccccc1)/C(C)C)O	C22H24N2O6	412.44	30	12	0.32	10	7	2	109.77	106.45	3.31	2.69	2.15	1.55	3.58	2.66	-3.73	0.0772	0.000187	Soluble	-4.58	0.0109	2.64e-05	Moderately soluble	-5.47	0.00141	3.41e-06	Moderately soluble	High	No	Yes	No	Yes	Yes	No	Yes	-6.91	0	0	0	0	0	0.55	0	2	2	4.05
DCM1239	O=C(CC1=NC(=O)NC(=O)C1)NCc1ccc(cc1)Cl	C13H12ClN3O3	293.71	20	6	0.23	5	4	2	80.66	87.63	1.46	0.98	0.51	1.27	2.63	1.37	-2.17	1.98	0.00675	Soluble	-2.41	1.15	0.00391	Soluble	-4.79	0.0048	1.63e-05	Moderately soluble	High	No	No	No	No	No	No	No	-7.4	0	0	0	0	0	0.55	0	0	0	2.73
DCM124462	Cc1cc(c(o1)C)C(=O)N[C@@H](C(=O)O)Cc1ccccc1	C16H17NO4	287.31	21	11	0.25	6	4	2	77.51	79.54	2.27	2.65	2.32	1.33	2.86	2.29	-3.28	0.15	0.000522	Soluble	-3.97	0.0307	0.000107	Soluble	-4.72	0.00541	1.88e-05	Moderately soluble	High	No	No	No	No	No	No	No	-6.17	0	0	0	0	0	0.56	0	0	0	3.14
DCM124534	O=C([C@@H](N1C(=O)c2c(C1=O)cccc2)Cc1ccccc1)NC(C)(C)C	C21H22N2O3	350.41	26	12	0.29	6	3	1	103.09	66.48	2.76	3.22	2.43	2.65	3.41	2.89	-3.99	0.0361	0.000103	Soluble	-4.29	0.018	5.14e-05	Moderately soluble	-6.2	0.00022	6.27e-07	Poorly soluble	High	Yes	No	No	Yes	Yes	Yes	Yes	-6.15	0	0	0	0	0	0.55	0	1	1	2.84
DCM124986	CCN(CCCN([C@H](c1ccc(cc1)F)C(=O)NC(C)(C)C)C(=O)Cn1nnc(n1)c1ccc(c(c1)OC)OC)CC	C30H42FN7O4	583.7	42	17	0.5	17	9	1	158.27	114.71	5.18	4.61	3.81	1.93	3.79	3.86	-5.54	0.00168	2.88e-06	Moderately soluble	-6.74	0.000105	1.8e-07	Poorly soluble	-8.04	5.36e-06	9.18e-09	Poorly soluble	High	No	No	No	Yes	No	Yes	Yes	-6.59	2	3	1	0	1	0.17	0	0	3	4.97
DCM12522	O=C(N[C@@H](C(=O)NC[C@@H]1CCCO1)C)OCc1ccccc1	C16H22N2O4	306.36	22	6	0.5	9	4	2	81.12	76.66	3.06	1.59	1.44	0.86	1.82	1.76	-2.35	1.37	0.00448	Soluble	-2.81	0.473	0.00155	Soluble	-3.99	0.0314	0.000103	Soluble	High	No	Yes	No	No	No	No	No	-7.04	0	0	0	0	0	0.55	0	0	1	3.35
DCM125230	CCN(S(=O)(=O)N1CCC(CC1)C(=O)N[C@H](CCc1ccccc1)C)CC	C20H33N3O3S	395.56	27	6	0.65	10	5	1	113.46	78.1	3.31	2.67	3.12	2.53	1.83	2.69	-3.48	0.131	0.000332	Soluble	-3.96	0.0432	0.000109	Soluble	-4.91	0.00489	1.24e-05	Moderately soluble	High	Yes	Yes	No	Yes	No	Yes	Yes	-6.82	0	0	0	0	0	0.55	0	0	2	3.47
DCM125797	CC(/C(=N\C(=O)c1ccccc1)/[C@@H](N1CCCCCC1)O)C	C18H26N2O2	302.41	22	6	0.56	5	4	1	94.25	52.9	2.92	3.43	2.74	2.84	3.38	3.06	-3.75	0.0541	0.000179	Soluble	-4.22	0.0182	6.01e-05	Moderately soluble	-3.73	0.0567	0.000187	Soluble	High	Yes	No	No	No	No	No	No	-5.71	0	0	0	0	0	0.55	0	1	0	3.65
DCM125972	CCCn1c(=S)[nH]c2c(c1=O)ccc(c2)C(=O)NC1CCCCC1	C18H23N3O2S	345.46	24	10	0.5	5	2	2	99.19	98.98	3.05	3.21	3.53	2.27	4.58	3.33	-3.98	0.036	0.000104	Soluble	-4.96	0.00378	1.09e-05	Moderately soluble	-5.12	0.00263	7.62e-06	Moderately soluble	High	No	No	Yes	Yes	Yes	No	Yes	-6.13	0	0	0	0	0	0.55	0	1	0	2.63
DCM126140	COc1ccccc1CNC(=O)[C@H](C(C)C)NC(=O)c1ccccc1	C20H24N2O3	340.42	25	12	0.3	9	3	2	97.45	67.43	3.52	3.38	2.61	2.49	3.36	3.07	-3.84	0.0491	0.000144	Soluble	-4.47	0.0114	3.35e-05	Moderately soluble	-6.29	0.000176	5.18e-07	Poorly soluble	High	Yes	Yes	No	Yes	Yes	Yes	Yes	-5.98	0	0	0	0	0	0.55	0	0	1	2.59
DCM126456	O=C(CN1C(=O)N[C@](C1=O)(C)c1cccc(c1)Br)N[C@H]1CCCC[C@@H]1C	C19H24BrN3O3	422.32	26	6	0.53	5	3	2	109.77	78.51	3.19	3.31	2.04	2.1	2.7	2.67	-4.38	0.0174	4.13e-05	Moderately soluble	-4.63	0.00979	2.32e-05	Moderately soluble	-5.52	0.00127	3.01e-06	Moderately soluble	High	No	Yes	No	Yes	Yes	No	Yes	-6.53	0	0	0	0	0	0.55	0	1	1	3.76
DCM126555	CC([C@@H]1CC[C@H](CC1)C(=O)N[C@@H](C(=O)O)Cc1ccccc1)C	C19H27NO3	317.42	23	6	0.58	7	3	2	91.75	66.4	2.52	4.06	3.26	2.81	3.27	3.18	-4.1	0.0254	8e-05	Moderately soluble	-5.16	0.0022	6.94e-06	Moderately soluble	-4.23	0.0185	5.83e-05	Moderately soluble	High	Yes	No	No	No	Yes	No	No	-5.35	0	0	0	0	0	0.56	0	0	1	3.22
DCM126982	Cc1ccc2c(c1)cc([nH]2)CNC(=O)c1ccccc1F	C17H15FN2O	282.31	21	15	0.12	4	2	2	80.71	44.89	2.77	3.32	3.81	2.99	4.45	3.47	-3.95	0.0319	0.000113	Soluble	-3.94	0.0325	0.000115	Soluble	-6.87	3.83e-05	1.36e-07	Poorly soluble	High	Yes	No	Yes	Yes	No	Yes	Yes	-5.66	0	0	0	0	0	0.55	0	0	0	2.06
DCM127471	CC[C@@H](Cc1ccccc1)NC(=O)[C@@H]1CC[C@@H](CC1)C/N=C\1/C(=O)C(=O)[C@@H]1N1CCCC1	C26H35N3O3	437.57	32	6	0.62	9	5	1	130.3	78.84	3.55	3.81	2.61	1.7	4.87	3.31	-4.5	0.0139	3.18e-05	Moderately soluble	-5.16	0.00302	6.91e-06	Moderately soluble	-6.28	0.000232	5.3e-07	Poorly soluble	High	No	Yes	No	No	No	Yes	Yes	-6.26	0	1	0	0	0	0.55	1	2	3	4.89
DCM127745	CC(CN1CCNC(=O)/C/1=C/[C@H](NCc1cnn(c1)c1cccc(c1)F)O)C	C20H26FN5O2	387.45	28	11	0.4	7	5	3	111.66	82.42	1.23	1.82	0.9	1.45	1.88	1.45	-3.22	0.235	0.000606	Soluble	-3.17	0.262	0.000675	Soluble	-4.71	0.0075	1.94e-05	Moderately soluble	High	No	Yes	No	No	No	No	No	-7.37	0	0	0	0	0	0.55	0	2	1	3.87
DCM127982	O=C(/N=C(/[C@@H](OCC(=O)N1[C@@H](C)CCC[C@@H]1C)O)\C(C)C)OCc1ccccc1	C22H32N2O5	404.5	29	6	0.59	10	6	1	116.02	88.43	3.19	3.52	3.01	2.17	3.22	3.02	-4.06	0.0353	8.74e-05	Moderately soluble	-5.06	0.00352	8.69e-06	Moderately soluble	-3.93	0.0474	0.000117	Soluble	High	No	No	No	No	No	No	Yes	-6.27	0	0	0	0	0	0.55	0	2	3	4.79
DCM128167	O[C@@H](O[C@H](C(=O)NCc1ccccc1)C)/C=N/C(=O)C1CCCCC1	C19H26N2O4	346.42	25	6	0.53	9	5	2	96.11	87.99	2.68	2.44	2.05	1.49	3.12	2.36	-3.11	0.27	0.000779	Soluble	-3.93	0.0406	0.000117	Soluble	-3.89	0.0442	0.000128	Soluble	High	No	Yes	No	No	No	No	No	-6.68	0	0	0	0	0	0.55	0	2	1	3.78
DCM128220	CSCCC(=N)[C@H](N1CCC(CC1)C(=O)N[C@H](C(=O)NCc1ccccc1OC)C(C)C)O	C24H38N4O4S	478.65	33	6	0.62	14	6	4	137.86	140.05	2.86	2.08	1.72	0.86	3.16	2.14	-3.33	0.225	0.000469	Soluble	-4.65	0.0107	2.24e-05	Moderately soluble	-5.02	0.00461	9.64e-06	Moderately soluble	High	No	Yes	No	No	No	No	No	-7.74	0	2	2	1	0	0.55	0	1	2	4.52
DCM128225	CSCC[C@@H](C(=O)NC[C@@H]1CC[C@H](CC1)C(=O)O)NC(=O)[C@H](n1c(=O)[nH]c2c(c1=O)cccc2)Cc1ccccc1	C30H36N4O6S	580.7	41	16	0.43	14	6	4	159.93	175.66	2.76	3.34	2.72	2.25	4.1	3.03	-4.91	0.00716	1.23e-05	Moderately soluble	-6.71	0.000114	1.97e-07	Poorly soluble	-7.35	2.58e-05	4.45e-08	Poorly soluble	Low	No	Yes	No	No	Yes	No	Yes	-7.47	1	3	2	1	1	0.11	0	0	2	5.16
DCM128922	OC[C@H]([C@@H]([C@H]1C[C@H]1C(=O)NC1CCCCC1)O)NC(=O)[C@@H](NC(=O)OC(C)(C)C)COCc1ccccc1	C28H43N3O7	533.66	38	6	0.68	17	7	5	142.05	146.22	3.89	1.9	1.87	0.67	2.66	2.2	-3.34	0.244	0.000457	Soluble	-4.59	0.0136	2.55e-05	Moderately soluble	-4.89	0.00691	1.29e-05	Moderately soluble	Low	No	Yes	No	No	No	No	No	-8.21	1	3	2	1	1	0.55	0	0	2	5.49
DCM129628	CCC/C(=C\C(=O)/N=C(/Cc1ccccc1)\CO)/[C@H](N1CCC[C@@H]1CO[C@H](/C(=C/C(=O)OC(C)(C)C)/CC=C)O)O	C32H46N2O7	570.72	41	6	0.53	18	9	3	164.64	128.89	5.82	4.6	3.5	2.38	5.7	4.4	-5.2	0.00363	6.36e-06	Moderately soluble	-7.03	5.31e-05	9.3e-08	Poorly soluble	-4.84	0.00817	1.43e-05	Moderately soluble	High	No	Yes	No	No	No	No	No	-6.52	1	3	1	0	1	0.55	0	4	3	6.09
DCM129636	OC/C(=N\C(=O)/C=C/1\CCCC/C(=C/C(=O)OC(C)(C)C)/[C@@H](OC[C@@H]2N([C@H]1O)CCC2)O)/Cc1ccccc1	C30H42N2O7	542.66	39	6	0.57	8	9	3	153.38	128.89	3.94	2.3	2.69	2.07	3.6	2.92	-4.24	0.0313	5.76e-05	Moderately soluble	-4.64	0.0123	2.27e-05	Moderately soluble	-4.25	0.0303	5.58e-05	Moderately soluble	High	No	Yes	No	No	No	No	No	-7.98	1	3	0	0	0	0.55	0	2	2	6.39
DCM129644	OC/C(=N\C(=O)/C=C/1\CCCC/C(=C/C(=O)OC(C)(C)C)/[C@@H](OC[C@H]2N([C@@H]1O)CCC2)O)/Cc1ccccc1	C30H42N2O7	542.66	39	6	0.57	8	9	3	153.38	128.89	3.2	2.3	2.69	2.07	3.6	2.77	-4.24	0.0313	5.76e-05	Moderately soluble	-4.64	0.0123	2.27e-05	Moderately soluble	-4.25	0.0303	5.58e-05	Moderately soluble	High	No	Yes	No	No	No	No	No	-7.98	1	3	0	0	0	0.55	0	2	2	6.39
DCM129654	OC[C@@H](N1C[C@H](C)[C@@H](CN(C(=O)Nc2ccc3c(c2)OCO3)C)Oc2c(C1=O)cc(cc2)NC(=O)Cc1ccccc1)C	C32H36N4O7	588.65	43	18	0.34	11	7	3	164.62	129.67	3.88	3.2	3.22	1.97	2.79	3.01	-5.09	0.00479	8.14e-06	Moderately soluble	-5.59	0.0015	2.54e-06	Moderately soluble	-7.7	1.18e-05	2e-08	Poorly soluble	High	No	Yes	No	No	Yes	Yes	Yes	-7.62	2	3	1	0	0	0.17	0	0	2	5.27
DCM129663	OC[C@H](N1C[C@@H](C)[C@H](CN(C(=O)NC2CCCCC2)C)Oc2c(CC1=O)cc(cc2)NC(=O)CCC(F)(F)F)C	C28H41F3N4O5	570.64	40	6	0.68	12	8	3	149.16	111.21	3.3	3.39	4.78	2.27	3.23	3.39	-4.83	0.00839	1.47e-05	Moderately soluble	-5.4	0.00225	3.94e-06	Moderately soluble	-5.94	0.000654	1.15e-06	Moderately soluble	High	No	Yes	No	No	No	No	Yes	-7.37	1	3	1	0	0	0.55	0	0	2	5.53
DCM129665	OC[C@H](N1C[C@H](C)[C@@H](CN(C(=O)NC2CCCCC2)C)Oc2c(C1=O)cccc2NC(=O)Cc1ccccc1)C	C31H42N4O5	550.69	40	12	0.52	11	5	3	159.26	111.21	4.01	3.64	3.49	2.59	3.04	3.35	-5.04	0.00498	9.05e-06	Moderately soluble	-5.66	0.00119	2.17e-06	Moderately soluble	-6.91	6.73e-05	1.22e-07	Poorly soluble	High	No	Yes	No	No	No	Yes	Yes	-7.07	1	3	1	0	0	0.55	0	0	3	5.19
DCM129668	OC[C@@H](N1C[C@@H](C)[C@@H](CN(C(=O)NC(C)C)C)Oc2c(C1=O)cccc2NC(=O)Nc1ccc(cc1)OC)C	C28H39N5O6	541.64	39	12	0.46	12	6	4	153.36	132.47	3.26	2.4	2.85	1.82	1.45	2.36	-4.15	0.0387	7.15e-05	Moderately soluble	-4.82	0.00813	1.5e-05	Moderately soluble	-6.08	0.000445	8.22e-07	Poorly soluble	High	No	Yes	No	No	No	No	Yes	-7.9	2	3	1	1	0	0.17	0	0	2	5.11
DCM129712	OC[C@H](N1C[C@@H](C)[C@@H](OCCCC[C@@H](Oc2c(C1=O)cc(cc2)NC(=O)C1CCCCC1)C)CN(C(=O)Cc1ccccc1)C)C	C37H53N3O6	635.83	46	12	0.59	10	6	2	185.99	108.41	4.69	5.44	5.13	2.87	4.73	4.57	-6.74	0.000115	1.81e-07	Poorly soluble	-7.47	2.14e-05	3.37e-08	Poorly soluble	-8.04	5.79e-06	9.1e-09	Poorly soluble	High	No	Yes	No	No	No	No	Yes	-6.32	1	3	0	0	2	0.55	0	0	3	6.43
DCM129859	COc1ccc(cc1)[C@H]1C[C@@H](O)[C@@H](CN1C(=O)C1CCCCC1)n1nnc(c1)COC(=O)c1ccccc1	C29H34N4O5	518.6	38	17	0.45	9	7	1	144.85	106.78	3.78	3.63	3.24	2.64	2.69	3.2	-5.08	0.00432	8.33e-06	Moderately soluble	-5.56	0.00143	2.75e-06	Moderately soluble	-5.94	0.000601	1.16e-06	Moderately soluble	High	No	Yes	No	No	Yes	Yes	Yes	-6.89	1	3	0	0	0	0.55	0	0	3	4.88
DCM129869	CCN([C@@H](c1cc(CC(=O)NCCCCc2ccccc2)c(=O)n(c1C)Cc1ccc(cc1)OC)O)CC	C31H41N3O4	519.67	38	18	0.42	15	5	2	152.65	83.8	4.7	3.69	3.9	3.33	5.88	4.3	-4.75	0.0093	1.79e-05	Moderately soluble	-5.14	0.00376	7.24e-06	Moderately soluble	-9.28	2.74e-07	5.27e-10	Poorly soluble	High	No	Yes	No	Yes	No	Yes	Yes	-6.85	1	3	1	0	0	0.55	0	1	3	4.56
DCM129910	OC[C@@H](N1C[C@H](C)[C@@H](OCCCC[C@H](Oc2c(C1=O)cc(cc2)NC(=O)NC(C)C)C)CN(Cc1ccc(cc1)C(F)(F)F)C)C	C34H49F3N4O5	650.77	46	12	0.59	11	9	3	176.87	103.37	4.67	5.31	6.59	3.35	4.63	4.91	-6.69	0.000134	2.06e-07	Poorly soluble	-7.23	3.81e-05	5.86e-08	Poorly soluble	-8.4	2.61e-06	4.02e-09	Poorly soluble	Low	No	Yes	No	No	No	No	Yes	-6.5	1	4	1	1	2	0.55	0	0	3	6.37
DCM129923	CCCCn1c(C)c(cc(c1=O)CC(=O)NCCCCc1ccccc1)[C@@H](N(C(C)C)C(C)C)O	C29H45N3O3	483.69	35	12	0.59	15	4	2	145.71	74.57	4.96	4.34	4.42	3.7	5.99	4.68	-4.84	0.00704	1.46e-05	Moderately soluble	-5.62	0.00116	2.39e-06	Moderately soluble	-7.93	5.66e-06	1.17e-08	Poorly soluble	High	No	Yes	No	No	No	Yes	Yes	-6.17	0	3	1	0	0	0.55	0	1	3	4.6
DCM130132	CCNC(=O)[C@H]1CCCN(CC1)C(=O)c1cccc(c1)C(F)(F)F	C17H21F3N2O2	342.36	24	6	0.53	6	5	1	87.79	49.41	2.77	2.76	3.86	2.82	3.27	3.1	-3.49	0.111	0.000323	Soluble	-3.45	0.121	0.000352	Soluble	-4.76	0.00591	1.73e-05	Moderately soluble	High	Yes	No	No	No	No	Yes	No	-6.43	0	0	0	0	0	0.55	0	0	0	2.68
DCM130317	CN(CCCNC(=O)Cc1cc([C@@H](N(C(C)C)C(C)C)O)c(n(c1=O)Cc1ccccc1)C)C	C27H42N4O3	470.65	34	12	0.56	13	5	2	138.99	77.81	4.24	2.31	2.6	2.51	3.94	3.12	-3.62	0.114	0.000242	Soluble	-3.58	0.123	0.000262	Soluble	-6.46	0.000165	3.5e-07	Poorly soluble	High	Yes	Yes	No	No	No	Yes	Yes	-7.53	0	2	1	0	0	0.55	0	1	2	4.52
DCM130382	O=C([C@H](N1CCc2c(C1)cccc2)CCc1ccccc1)NC1CCCCC1	C25H32N2O	376.53	28	12	0.48	7	2	1	119.32	32.34	3.86	5.3	3.96	3.99	5	4.42	-5.37	0.00161	4.28e-06	Moderately soluble	-5.73	0.000701	1.86e-06	Moderately soluble	-7.32	1.82e-05	4.83e-08	Poorly soluble	High	Yes	Yes	No	Yes	No	Yes	Yes	-4.83	0	0	0	0	1	0.55	0	0	2	3.33
DCM130776	O=C(CN1C(=O)NC2(C1=O)CCCC2)Nc1cccc(c1)Cl	C15H16ClN3O3	321.76	22	6	0.4	4	3	2	89.54	78.51	2.24	1.73	1.19	1.31	1.74	1.64	-2.86	0.441	0.00137	Soluble	-3	0.325	0.00101	Soluble	-4.49	0.0104	3.24e-05	Moderately soluble	High	No	Yes	Yes	No	No	No	No	-7.03	0	0	0	0	0	0.55	0	1	0	2.72
DCM130786	Cc1ccc(cc1)OCCNC(=O)c1cc(O)nc2c1cccc2	C19H18N2O3	322.36	24	16	0.16	6	4	2	92.55	71.45	2.92	4.08	3.06	2.29	3.4	3.15	-4.51	0.01	3.12e-05	Moderately soluble	-5.29	0.00167	5.18e-06	Moderately soluble	-6.56	8.92e-05	2.77e-07	Poorly soluble	High	Yes	No	Yes	Yes	Yes	Yes	Yes	-5.37	0	0	0	0	0	0.55	0	0	1	2.26
DCM130893	C[C@@H]1CC[C@H](CC1)NC(=O)[C@H](C(C)C)NC(=O)c1ccccc1	C19H28N2O2	316.44	23	6	0.58	7	2	2	93.2	58.2	2.83	3.97	3.14	2.67	3.1	3.14	-4.03	0.0293	9.25e-05	Moderately soluble	-4.89	0.00405	1.28e-05	Moderately soluble	-4.84	0.00453	1.43e-05	Moderately soluble	High	Yes	No	No	No	No	Yes	Yes	-5.41	0	0	0	0	0	0.55	0	0	1	3.08
DCM131519	OC[C@H]([C@@H]([C@@H]1C[C@@H]1C(=O)N(C)C)O)NC(=O)[C@@H](NC(=O)OC(C)(C)C)COCc1ccccc1	C24H37N3O7	479.57	34	6	0.62	16	7	4	125.03	137.43	3.43	0.27	0.51	-0.14	1.42	1.09	-2.06	4.2	0.00875	Soluble	-2.72	0.919	0.00192	Soluble	-3.57	0.128	0.000268	Soluble	High	No	Yes	No	No	No	No	No	-9.03	0	1	1	1	1	0.55	0	0	2	5.07
DCM131653	O=C(Cc1cc([C@H](N2CCOCC2)O)c(n(c1=O)Cc1ccc(cc1)C(C)(C)C)C)NCCc1ccccn1	C31H40N4O4	532.67	39	18	0.45	11	6	2	156.5	96.69	4.05	2.53	2.42	2.28	5.21	3.3	-4.35	0.0237	4.45e-05	Moderately soluble	-4.21	0.0331	6.21e-05	Moderately soluble	-8.43	1.99e-06	3.73e-09	Poorly soluble	High	No	Yes	No	No	No	Yes	Yes	-7.75	1	3	1	0	0	0.55	0	0	2	4.72
DCM131779	CSCC/C(=N\C(=O)OC(C)(C)C)/[C@@H](N1CCC(CC1)C(=O)N[C@H](C(=O)O)Cc1ccccc1)O	C25H37N3O6S	507.64	35	6	0.6	14	8	3	141.55	153.83	3.75	0.57	2.58	1.97	3.2	2.41	-2.55	1.43	0.00282	Soluble	-3.37	0.215	0.000424	Soluble	-4.3	0.0252	4.95e-05	Moderately soluble	Low	No	Yes	No	No	No	No	No	-8.99	1	3	2	1	1	0.55	0	1	2	5.2
DCM131780	CC[C@H](/C(=N\C(=O)OC(C)(C)C)/[C@H](N1CCC(CC1)C(=O)N[C@@H](C(=O)O)Cc1ccc(cc1)O)O)C	C26H39N3O7	505.6	36	6	0.62	13	9	4	140.79	148.76	3.49	1.03	2.58	1.67	2.87	2.33	-2.89	0.653	0.00129	Soluble	-3.74	0.0912	0.00018	Soluble	-3.65	0.112	0.000222	Soluble	Low	No	Yes	No	No	No	No	No	-8.65	1	3	2	1	0	0.55	0	1	2	5.33
DCM131781	O[C@@H](/C(=N/C(=O)OC(C)(C)C)/C(C)C)N1CCC(CC1)C(=O)N[C@@H](C(=O)O)Cc1ccccc1	C25H37N3O6	475.58	34	6	0.6	12	8	3	133.96	128.53	2.86	1.03	2.48	1.97	2.91	2.25	-2.78	0.796	0.00167	Soluble	-3.32	0.228	0.00048	Soluble	-3.86	0.0661	0.000139	Soluble	High	No	Yes	No	No	No	No	No	-8.47	0	2	1	0	0	0.55	0	1	2	5
DCM131782	N=C[C@@H](N1CCC(CC1)C(=O)N[C@@H](C(=O)O)Cc1ccccc1)O	C17H23N3O4	333.38	24	6	0.47	8	6	4	93.7	113.72	1.42	-1.79	0.1	0.22	1	0.19	-0.44	122	0.366	Very soluble	-0.08	276	0.828	Very soluble	-2.26	1.84	0.00553	Soluble	High	No	No	No	No	No	No	No	-9.6	0	0	0	0	0	0.55	0	1	1	3.43
DCM131783	O[C@H](/C(=N/C(=O)OC(C)(C)C)/C)N1CCC(CC1)C(=O)N[C@@H](C(=O)O)Cc1ccccc1	C23H33N3O6	447.52	32	6	0.57	11	8	3	124.35	128.53	2.62	-0.01	1.84	1.55	2.25	1.65	-2.02	4.26	0.00953	Soluble	-2.24	2.58	0.00576	Soluble	-3.45	0.159	0.000355	Soluble	High	No	Yes	No	No	No	No	No	-9.04	0	0	1	0	0	0.55	0	1	2	4.7
DCM131967	OC(=O)C[C@@H](Cc1ccccc1)NC(=O)OC(C)(C)C	C15H21NO4	279.33	20	6	0.47	8	4	2	76.15	75.63	2.26	2.45	2.6	2.22	2.03	2.31	-2.81	0.433	0.00155	Soluble	-3.68	0.0581	0.000208	Soluble	-3.58	0.0738	0.000264	Soluble	High	Yes	No	No	No	No	No	No	-6.26	0	0	0	0	0	0.56	0	0	1	2.75
DCM132655	OC(=O)[C@@H](NC(=O)OC(C)(C)C)CSCc1ccccc1	C15H21NO4S	311.4	21	6	0.47	9	4	2	83.74	100.93	2.58	2.7	2.75	2.22	2.16	2.48	-3.09	0.254	0.000815	Soluble	-4.47	0.0105	3.37e-05	Moderately soluble	-3.67	0.0658	0.000211	Soluble	High	No	No	No	No	No	No	No	-6.28	0	0	0	0	0	0.56	0	0	1	3.44
DCM132728	OC(=O)[C@@H](NC(=O)OC(C)(C)C)CSCc1ccccc1	C15H21NO4S	311.4	21	6	0.47	9	4	2	83.74	100.93	2.58	2.7	2.75	2.22	2.16	2.48	-3.09	0.254	0.000815	Soluble	-4.47	0.0105	3.37e-05	Moderately soluble	-3.67	0.0658	0.000211	Soluble	High	No	No	No	No	No	No	No	-6.28	0	0	0	0	0	0.56	0	0	1	3.44
DCM133150	O=C(N[C@@H](C(C)(C)C)C(=O)O)OCc1ccccc1	C14H19NO4	265.3	19	6	0.43	7	4	2	71.04	75.63	1.67	2.79	2.26	1.96	1.63	2.06	-3.01	0.257	0.000968	Soluble	-4.03	0.0245	9.23e-05	Moderately soluble	-3.18	0.176	0.000664	Soluble	High	Yes	No	No	No	No	No	No	-5.94	0	0	0	0	0	0.56	0	0	0	2.81
DCM133197	CC(CNC[C@@H]([C@@H](Cc1ccccc1)NC(=O)OC(C)(C)C)O)C	C19H32N2O3	336.47	24	6	0.63	11	4	3	97.57	70.59	3.51	3.23	2.73	2.46	3.02	2.99	-3.42	0.128	0.00038	Soluble	-4.39	0.0139	4.12e-05	Moderately soluble	-4.93	0.00396	1.18e-05	Moderately soluble	High	Yes	Yes	No	No	No	No	No	-6.06	0	0	1	0	0	0.55	0	0	1	3.63
DCM133239	O=C(N[C@@H](C(C)(C)C)C(=O)O)OCc1ccccc1	C14H19NO4	265.3	19	6	0.43	7	4	2	71.04	75.63	1.67	2.79	2.26	1.96	1.63	2.06	-3.01	0.257	0.000968	Soluble	-4.03	0.0245	9.23e-05	Moderately soluble	-3.18	0.176	0.000664	Soluble	High	Yes	No	No	No	No	No	No	-5.94	0	0	0	0	0	0.56	0	0	0	2.81
DCM133405	C[C@@H]([C@@H](C(=O)N)NC(=O)OCc1ccccc1)O	C12H16N2O4	252.27	18	6	0.33	7	4	3	63.99	101.65	1.76	0.33	0	0.21	0.17	0.49	-1.4	10.1	0.0401	Very soluble	-2.03	2.36	0.00937	Soluble	-2.05	2.26	0.00897	Soluble	High	No	No	No	No	No	No	No	-7.6	0	0	0	0	0	0.55	0	0	0	3.03
DCM134950	COc1cc(ccc1OC(C)C)[C@@H]1CN2C(=O)CN(C(=O)[C@@]2(c2c1c1ccccc1[nH]2)C)C1CCN(CC1)Cc1ccccc1	C37H42N4O4	606.75	45	21	0.41	7	5	1	187.05	78.11	4.58	5.42	4.26	2.95	5.54	4.55	-6.9	7.64e-05	1.26e-07	Poorly soluble	-6.82	9.27e-05	1.53e-07	Poorly soluble	-9.85	8.55e-08	1.41e-10	Poorly soluble	High	No	No	No	Yes	No	Yes	Yes	-6.15	1	3	0	0	2	0.55	0	0	2	5.46
DCM135396	O=C(c1ccc(c(c1)S(=O)(=O)N1CCOCC1)Cl)NC[C@@H](c1ccccc1)O	C19H21ClN2O5S	424.9	28	12	0.32	7	6	2	108.2	104.32	2.5	1.45	2.2	1.08	1.99	1.85	-3.24	0.243	0.000571	Soluble	-3.25	0.241	0.000567	Soluble	-5.42	0.00162	3.8e-06	Moderately soluble	High	No	Yes	No	Yes	No	Yes	Yes	-7.86	0	0	0	0	0	0.55	0	0	1	3.35
DCM135447	O=C([C@H](NC(=O)C1CCN(CC1)[C@@H](/C(=N\C(=O)OC(C)(C)C)/Cc1ccccc1)O)C)Nc1ccc(cc1)C	C30H40N4O5	536.66	39	12	0.47	13	7	3	156.57	120.33	3.75	3.95	3.52	2.6	4.14	3.59	-5.03	0.00506	9.43e-06	Moderately soluble	-6.18	0.000357	6.65e-07	Poorly soluble	-6.88	7.04e-05	1.31e-07	Poorly soluble	High	No	Yes	No	No	No	Yes	Yes	-6.77	1	3	1	0	0	0.55	0	1	3	5.28
DCM136080	CC(Cc1ccc(cc1)[C@H](NC(=O)c1ccccc1)C)C	C19H23NO	281.39	21	12	0.32	6	1	1	88.12	29.1	3.43	4.69	4.05	4.23	4.64	4.21	-4.57	0.00764	2.72e-05	Moderately soluble	-5.03	0.00263	9.35e-06	Moderately soluble	-6.58	7.49e-05	2.66e-07	Poorly soluble	High	Yes	Yes	No	Yes	No	Yes	Yes	-4.69	1	0	0	0	0	0.55	0	0	1	2.07
DCM136090	CSCC[C@H](C(=O)NC[C@@H]1CC[C@H](CC1)C(=O)N[C@H](c1ccccc1)C(=O)O)NC(=O)OC(C)(C)C	C26H39N3O6S	521.67	36	6	0.62	16	6	4	140.51	159.13	2.94	3.35	3.17	1.77	3.09	2.86	-4.25	0.0292	5.6e-05	Moderately soluble	-6.37	0.000223	4.27e-07	Poorly soluble	-5.54	0.00152	2.92e-06	Moderately soluble	Low	No	Yes	No	No	No	No	Yes	-7.1	1	3	2	1	2	0.11	0	0	2	5
DCM136196	O=C([C@H](NC(=O)N1CCn2c1nc1c2cccc1)Cc1ccccc1)NC1CCCC1	C24H27N5O2	417.5	31	15	0.38	8	3	2	123.24	79.26	3.58	3.27	2.86	3.1	2.19	3	-4.32	0.02	4.8e-05	Moderately soluble	-4.61	0.0103	2.46e-05	Moderately soluble	-6.01	0.00041	9.82e-07	Poorly soluble	High	No	Yes	No	Yes	Yes	Yes	Yes	-6.53	0	0	0	0	0	0.55	0	0	2	3.81
DCM136998	OC(=O)[C@@H](NC(=O)[C@@H]1CCCN1C(=O)OCc1ccccc1)Cc1ccccc1	C22H24N2O5	396.44	29	12	0.32	10	5	2	110.3	95.94	2.69	3.07	2.07	1.94	2.3	2.41	-3.88	0.0525	0.000132	Soluble	-4.75	0.00702	1.77e-05	Moderately soluble	-4.98	0.00419	1.06e-05	Moderately soluble	High	No	Yes	No	No	Yes	No	No	-6.54	0	0	0	0	0	0.56	0	0	2	3.67
DCM137295	Clc1ccc(cc1)C(=O)NCCCc1nc2c([nH]1)cccc2	C17H16ClN3O	313.78	22	15	0.18	6	2	2	88.2	57.78	2.18	3.74	3.58	2.93	4.36	3.36	-4.25	0.0176	5.62e-05	Moderately soluble	-4.65	0.0071	2.26e-05	Moderately soluble	-7.24	1.8e-05	5.74e-08	Poorly soluble	High	Yes	No	Yes	Yes	Yes	Yes	Yes	-5.56	0	0	0	0	0	0.55	0	0	1	1.96
DCM137409	CC(C[C@@H](C(=O)N[C@H](C(O)O)/C=C/C(=O)N)NC(=O)C1(CCN(CC1)C(=O)OC(C)(C)C)c1ccccc1)C	C28H42N4O7	546.66	39	6	0.57	15	7	5	149.41	171.29	3.12	1.43	0.94	0.56	2.04	1.62	-3.25	0.305	0.000557	Soluble	-4.63	0.0128	2.33e-05	Moderately soluble	-3.68	0.114	0.000209	Soluble	Low	No	Yes	No	No	No	No	No	-8.62	2	3	2	1	1	0.17	0	2	2	5.04
DCM137482	O=C(/C=C/1\[C@H](O)NCCN1CC(c1ccccc1)c1ccccc1)NCc1ncc([nH]1)C	C25H29N5O2	431.53	32	17	0.28	8	4	4	131.05	93.28	2.19	1.98	1.36	1.24	3.29	2.01	-3.63	0.102	0.000235	Soluble	-3.56	0.118	0.000272	Soluble	-7.13	3.2e-05	7.41e-08	Poorly soluble	High	No	Yes	No	No	No	Yes	No	-7.53	0	1	0	0	0	0.55	0	1	2	4.44
DCM138166	O=C(N[C@H](c1ccccc1)C)COC(=O)Cc1cccc(c1)C(F)(F)F	C19H18F3NO3	365.35	26	12	0.26	9	6	1	89.22	55.4	3.11	3.84	4.5	3.57	4.49	3.9	-4.27	0.0195	5.35e-05	Moderately soluble	-4.7	0.0073	2e-05	Moderately soluble	-6.68	7.55e-05	2.07e-07	Poorly soluble	High	Yes	No	Yes	Yes	No	Yes	Yes	-5.8	0	0	0	0	0	0.55	0	0	3	3.01
DCM138630	Fc1ccc(cc1)C(=O)NCc1nc2c([nH]1)cccc2	C15H12FN3O	269.27	20	15	0.07	4	3	2	73.53	57.78	2.17	2.39	2.9	2.32	3.39	2.63	-3.31	0.133	0.000494	Soluble	-3.24	0.153	0.000569	Soluble	-6.11	0.000208	7.71e-07	Poorly soluble	High	Yes	No	Yes	No	No	Yes	Yes	-6.25	0	0	0	0	0	0.55	0	0	0	1.77
DCM138633	Fc1ccc(cc1)C(=O)NCc1[nH]c2c(n1)cc(c(c2)C)C	C17H16FN3O	297.33	22	15	0.18	4	3	2	83.47	57.78	1.81	3.12	3.52	2.81	4.4	3.13	-3.89	0.0383	0.000129	Soluble	-4	0.0296	9.95e-05	Moderately soluble	-6.88	3.95e-05	1.33e-07	Poorly soluble	High	Yes	Yes	Yes	No	No	Yes	Yes	-5.9	0	0	0	0	0	0.55	0	0	0	2.06
DCM138767	OC(=O)/C=C/[C@H](C(O)O)NC(=O)C1CCN(CC1)[C@@H](/C(=N\C(=O)OC(C)(C)C)/Cc1ccccc1)O	C25H35N3O8	505.56	36	6	0.52	13	10	5	135.81	168.99	2.75	-1.35	0.69	0.77	1.56	0.88	-1.39	20.6	0.0408	Very soluble	-1.7	10.1	0.02	Very soluble	-1.99	5.19	0.0103	Soluble	Low	No	Yes	No	No	No	No	No	-10.34	2	3	2	1	1	0.17	0	3	2	5.32
DCM138768	NC(=O)C[C@H](C(=O)O)NC(=O)C1CCN(CC1)[C@@H](/C(=N\C(=O)OC(C)(C)C)/Cc1ccccc1)O	C24H34N4O7	490.55	35	6	0.54	13	9	4	132.06	171.62	2.28	-1.53	0.7	0.56	1.41	0.68	-1.19	31.9	0.0651	Very soluble	-1.57	13.3	0.0271	Very soluble	-3.01	0.477	0.000973	Soluble	Low	No	Yes	No	No	No	No	No	-10.38	1	2	2	1	1	0.55	0	1	2	5.07
DCM138770	O[C@H](/C(=N\C(=O)OC(C)(C)C)/Cc1ccccc1)N1CCC(CC1)C(=O)N[C@H](C(=O)O)C	C23H33N3O6	447.52	32	6	0.57	11	8	3	124.35	128.53	3.23	-0.01	1.84	1.55	2.25	1.77	-2.02	4.26	0.00953	Soluble	-2.24	2.58	0.00576	Soluble	-3.45	0.159	0.000355	Soluble	High	No	Yes	No	No	No	No	No	-9.04	0	0	1	0	0	0.55	0	1	2	4.86
DCM138772	CC(C[C@H](C(=O)O)NC(=O)C1CCN(CC1)[C@H](C(=N)Cc1ccccc1)O)C	C21H31N3O4	389.49	28	6	0.57	10	6	4	112.93	113.72	2.38	-0.04	1.51	1.14	2.28	1.46	-1.73	7.28	0.0187	Very soluble	-1.9	4.93	0.0127	Very soluble	-3.44	0.14	0.00036	Soluble	High	No	Yes	No	No	No	No	No	-8.7	0	0	0	0	0	0.55	0	1	2	3.85
DCM138773	CSC[C@H](C(=O)O)NC(=O)C1CCN(CC1)[C@@H](/C(=N\C(=O)OC(C)(C)C)/Cc1ccccc1)O	C24H35N3O6S	493.62	34	6	0.58	13	8	3	136.75	153.83	3.28	0.28	2.19	1.76	2.79	2.06	-2.35	2.21	0.00447	Soluble	-3.07	0.418	0.000847	Soluble	-3.92	0.0598	0.000121	Soluble	Low	No	Yes	No	No	No	No	No	-9.11	0	2	2	1	1	0.55	0	1	2	5.15
DCM138775	O[C@H](/C(=N\C(=O)OC(C)(C)C)/Cc1ccccc1)N1CCC(CC1)C(=O)NCC(=O)NCC(=O)O	C24H34N4O7	490.55	35	6	0.54	14	9	4	132.16	157.63	2.86	-1.06	0.57	0.56	1.64	0.92	-1.42	18.8	0.0383	Very soluble	-1.76	8.5	0.0173	Very soluble	-3.78	0.0816	0.000166	Soluble	Low	No	Yes	No	No	No	No	No	-10.04	1	2	2	1	1	0.55	0	1	2	4.81
DCM14135	CCOc1ccccc1NC(=O)[C@H](C(C)C)NC(=O)c1ccccc1F	C20H23FN2O3	358.41	26	12	0.3	9	4	2	98.95	67.43	3.06	3.91	3.85	3.14	3.8	3.55	-4.27	0.0191	5.33e-05	Moderately soluble	-5.02	0.00339	9.45e-06	Moderately soluble	-6.55	0.0001	2.8e-07	Poorly soluble	High	Yes	Yes	No	Yes	Yes	Yes	Yes	-5.71	0	0	0	0	0	0.55	0	0	3	2.98
DCM15251	CCOCCCNC(=O)[C@@H](NC(=O)c1ccco1)Cc1ccccc1	C19H24N2O4	344.4	25	11	0.37	12	4	2	93.93	80.57	3.49	2.51	2.16	0.83	3.17	2.43	-3.09	0.28	0.000812	Soluble	-3.85	0.0489	0.000142	Soluble	-6.29	0.000175	5.09e-07	Poorly soluble	High	No	Yes	No	Yes	Yes	Yes	Yes	-6.62	0	0	1	0	0	0.55	0	0	1	3.27
DCM15692	O=C([C@H](N(c1ccc(cc1C)C)[C@H](/C=N/C(=O)c1ccco1)O)c1cccnc1)NC1CCCCC1	C28H32N4O4	488.58	36	17	0.36	10	6	2	139.03	108.03	3.95	4.65	4.19	1.93	4.42	3.83	-5.49	0.00159	3.25e-06	Moderately soluble	-6.65	0.000111	2.26e-07	Poorly soluble	-7.22	2.95e-05	6.04e-08	Poorly soluble	High	No	Yes	No	Yes	Yes	Yes	Yes	-5.98	0	2	0	0	0	0.55	0	2	3	4.86
DCM15835	NC(=O)[C@@H](Cc1ccccc1)NC(=O)[C@@H]1CCCN1[C@@H](/C(=N/C(=O)OC(C)(C)C)/C)O	C22H32N4O5	432.51	31	6	0.55	11	7	3	120.68	134.32	2.85	1.72	1	0.93	1.76	1.65	-3.02	0.411	0.00095	Soluble	-4.16	0.0301	6.97e-05	Moderately soluble	-3.4	0.171	0.000396	Soluble	High	No	Yes	No	No	No	No	No	-7.72	0	0	1	1	0	0.55	0	1	2	4.63
DCM15926	CCO[C@H](/C(=N/C(=O)[C@@H]1CCCN1C(=O)OCc1ccccc1)/C(=O)OCC)O	C20H26N2O7	406.43	29	6	0.5	12	8	1	107.69	114.73	1.92	2.07	1.14	0.9	2.14	1.63	-3.03	0.384	0.000944	Soluble	-4.11	0.0317	7.79e-05	Moderately soluble	-3.15	0.286	0.000705	Soluble	High	No	Yes	No	Yes	No	No	No	-7.31	0	0	1	0	0	0.55	0	3	2	4.37
DCM15992	OC[C@@H](Cn1c2C[C@H]3[C@H](c2cc1C(=O)N1CCCC1)[C@](N(C3)C(=O)c1ccccc1)(Cc1ccc(cc1)OC)C(=O)OC)O	C34H39N3O7	601.69	44	17	0.44	12	7	2	170.32	121.54	3.68	2.59	1.89	1.79	3.59	2.71	-4.7	0.0121	2.01e-05	Moderately soluble	-4.79	0.00973	1.62e-05	Moderately soluble	-6.42	0.00023	3.83e-07	Poorly soluble	High	No	Yes	No	No	Yes	Yes	Yes	-8.13	1	3	1	0	1	0.55	0	0	2	5.61
DCM16070	O=C(C1CCN(CC1)S(=O)(=O)N1CCCC1)NCc1ccc(cc1)F	C17H24FN3O3S	369.45	25	6	0.59	6	6	1	100.8	78.1	2.5	1.28	2.08	2.22	1.13	1.84	-2.72	0.706	0.00191	Soluble	-2.52	1.12	0.00302	Soluble	-3.89	0.0473	0.000128	Soluble	High	No	Yes	No	No	No	No	No	-7.64	0	0	0	0	0	0.55	0	0	1	2.63
DCM1641	O=C1C[C@H](C)N(c2c(N1)cccc2)C(=O)Nc1ccc(cc1F)F	C17H15F2N3O2	331.32	24	12	0.18	3	4	2	92.86	61.44	2.68	2.19	3.43	3.25	2.36	2.78	-3.45	0.119	0.000358	Soluble	-3.11	0.255	0.000769	Soluble	-5.71	0.000646	1.95e-06	Moderately soluble	High	Yes	Yes	No	No	No	Yes	No	-6.77	0	0	0	0	0	0.55	0	0	0	3.27
DCM16704	NC(=O)/N=C(\[C@@H](N1CCN(CC1)c1cccc(c1C)C)O)/Cc1ccccc1	C22H28N4O2	380.48	28	12	0.36	6	4	2	119.69	82.16	3.14	2.87	1.74	2.68	2.83	2.65	-3.93	0.0449	0.000118	Soluble	-4.25	0.0212	5.56e-05	Moderately soluble	-4.97	0.00408	1.07e-05	Moderately soluble	High	No	Yes	No	No	No	No	No	-6.58	0	0	0	0	0	0.55	0	1	1	3.89
DCM1693	Fc1ccc(cc1)CNC(=O)c1cc(nn1c1ccccc1)C	C18H16FN3O	309.34	23	17	0.11	5	3	1	85.97	46.92	2.88	3.5	3.52	3.14	3.4	3.29	-4.18	0.0204	6.61e-05	Moderately soluble	-4.17	0.021	6.78e-05	Moderately soluble	-6.5	9.78e-05	3.16e-07	Poorly soluble	High	Yes	No	Yes	Yes	Yes	Yes	Yes	-5.7	0	0	0	0	0	0.55	0	0	0	2.38
DCM17142	C[C@@H](NC(=O)C1CCN(CC1)c1nnc(s1)n1cccc1)CCc1ccccc1	C22H27N5OS	409.55	29	16	0.41	8	3	1	120.21	91.29	3.46	4.07	3.3	3.14	3.66	3.53	-4.82	0.00615	1.5e-05	Moderately soluble	-5.69	0.000833	2.03e-06	Moderately soluble	-5.99	0.000415	1.01e-06	Moderately soluble	High	No	No	Yes	Yes	Yes	Yes	Yes	-5.91	0	0	0	0	0	0.55	0	0	3	4.12
DCM173	CCOc1ccc(cc1)NC(=O)[C@H](Cc1ccccc1)NC(=O)C1CCCCC1	C24H30N2O3	394.51	29	12	0.42	10	3	2	115.88	67.43	3.57	4.85	4.14	2.97	4.36	3.98	-4.99	0.00406	1.03e-05	Moderately soluble	-6	0.000394	1e-06	Poorly soluble	-7.26	2.15e-05	5.45e-08	Poorly soluble	High	Yes	No	No	Yes	Yes	Yes	Yes	-5.26	0	0	0	0	0	0.55	0	0	3	3.21
DCM1734	CC[C@@H]([C@H](C(=O)O)NC(=O)C1CCN(CC1)[C@@H](/C(=N\S(=O)(=O)c1ccc(cc1)C)/Cc1ccccc1)O)C	C28H37N3O6S	543.67	38	12	0.46	12	8	3	150.6	144.75	3.6	1.64	3.71	2.54	3.41	2.98	-3.69	0.112	0.000206	Soluble	-4.29	0.0277	5.1e-05	Moderately soluble	-6.11	0.000419	7.71e-07	Poorly soluble	Low	No	Yes	No	No	No	Yes	Yes	-8.45	1	3	2	1	0	0.55	0	1	2	5.34
DCM17549	CC(NC(=O)CN1CC[C@H]([C@H](C1)O)c1ccccc1)C	C16H24N2O2	276.37	20	6	0.56	5	3	2	83.53	52.57	2.56	1.67	0.98	1.37	1.72	1.66	-2.5	0.879	0.00318	Soluble	-2.39	1.13	0.00409	Soluble	-3.31	0.135	0.000488	Soluble	High	Yes	No	No	No	No	Yes	No	-6.8	0	0	0	0	0	0.55	0	0	0	2.77
DCM17562	COc1ccccc1C[C@@H](C(=O)NC1CCN(CC1)C(=O)NCc1ccccc1)NC(=O)C	C25H32N4O4	452.55	33	12	0.4	12	4	3	129.36	99.77	3.23	2.22	1.7	1.65	2.54	2.27	-3.52	0.136	0.000301	Soluble	-3.95	0.0508	0.000112	Soluble	-6.66	0.0001	2.21e-07	Poorly soluble	High	No	Yes	No	No	No	Yes	Yes	-7.48	0	0	1	0	0	0.55	0	0	2	3.91
DCM17563	CCOc1ccc(cc1)NC(=O)N1CCC(CC1)NC(=O)[C@@H](Cc1ccccc1OC)NC(=O)C	C26H34N4O5	482.57	35	12	0.42	13	5	3	137.39	109	3.64	2.62	2.38	1.61	2.63	2.58	-3.88	0.0639	0.000132	Soluble	-4.56	0.0133	2.76e-05	Moderately soluble	-6.75	8.56e-05	1.77e-07	Poorly soluble	High	No	Yes	No	No	No	Yes	Yes	-7.38	0	2	1	0	0	0.55	0	0	2	4.13
DCM17867	O=C([C@H](NC(=O)[C@H]1Cc2ccccc2CN1C(=O)OC(C)(C)C)C)NC1CCCCC1	C24H35N3O4	429.55	31	6	0.62	9	4	2	123.58	87.74	4.2	3.58	2.77	2.19	2.75	3.1	-4.31	0.0211	4.92e-05	Moderately soluble	-5.11	0.00334	7.79e-06	Moderately soluble	-5	0.00429	9.98e-06	Moderately soluble	High	No	Yes	No	No	Yes	Yes	Yes	-6.38	0	0	0	0	0	0.55	0	0	3	4.17
DCM17924	Oc1nc2ccccc2c(c1)C(=O)NCc1ccccc1F	C17H13FN2O2	296.3	22	16	0.06	4	4	2	81.21	62.22	2.53	3.04	3.28	2.77	3.38	3	-3.87	0.0403	0.000136	Soluble	-4.01	0.0288	9.72e-05	Moderately soluble	-6.32	0.000142	4.81e-07	Poorly soluble	High	Yes	No	Yes	No	No	Yes	Yes	-5.95	0	0	0	0	0	0.55	0	0	0	2.05
DCM18339	O=C(N[C@@H](c1ccc(cc1)F)C)Cc1ccccc1	C16H16FNO	257.3	19	12	0.19	5	2	1	73.28	29.1	2.69	3.13	3.34	3.63	3.94	3.35	-3.54	0.0734	0.000285	Soluble	-3.41	0.1	0.000389	Soluble	-6.04	0.000236	9.16e-07	Poorly soluble	High	Yes	No	No	No	No	Yes	No	-5.65	0	0	0	0	0	0.55	0	0	0	2.12
DCM18340	CCCCNC(=O)[C@@H](N1Cc2c(C1=O)cccc2)CSCc1ccccc1	C22H26N2O2S	382.52	27	12	0.36	10	2	1	115.03	74.71	3.5	3.73	3.18	3.1	4.54	3.61	-4.23	0.0225	5.88e-05	Moderately soluble	-4.99	0.00391	1.02e-05	Moderately soluble	-7.2	2.43e-05	6.35e-08	Poorly soluble	High	Yes	No	No	Yes	Yes	Yes	Yes	-5.99	0	0	0	0	0	0.55	0	0	3	3.48
DCM18430	O=C(OC(C)(C)C)N[C@H]([C@H](c1ccco1)O)Cc1ccccc1	C18H23NO4	317.38	23	11	0.39	8	4	2	87.49	71.7	2.94	2.9	3.12	1.62	2.88	2.69	-3.46	0.11	0.000346	Soluble	-4.07	0.0272	8.59e-05	Moderately soluble	-4.99	0.00327	1.03e-05	Moderately soluble	High	Yes	No	No	No	No	No	No	-6.18	0	0	0	0	0	0.55	0	0	1	3.8
DCM18438	O=C(N[C@H](C(=O)O)Cc1ccccc1)CSc1ccccc1	C17H17NO3S	315.39	22	12	0.18	8	3	2	86.65	91.7	1.65	3.17	2.59	2.76	2.94	2.62	-3.67	0.0677	0.000215	Soluble	-4.77	0.0054	1.71e-05	Moderately soluble	-5.24	0.00182	5.77e-06	Moderately soluble	High	No	No	No	No	No	Yes	No	-5.97	0	0	0	0	0	0.56	0	0	1	2.75
DCM18596	CCO[C@H](/C(=N\C(=O)CNC(=O)[C@H]1CCCN1C(=O)OC(C)(C)C)/Cc1ccc(cc1)O)O	C23H33N3O7	463.52	33	6	0.57	13	8	3	125.89	137.76	4.03	1.73	1.39	0.65	2.27	2.01	-3.08	0.385	0.000831	Soluble	-4.24	0.0267	5.76e-05	Moderately soluble	-3.66	0.102	0.000221	Soluble	High	No	Yes	No	No	No	No	No	-7.9	0	0	1	1	0	0.55	0	2	2	4.69
DCM18745	O=C(N[C@@H](c1ccccc1)C)COC(=O)c1ccccc1O	C17H17NO4	299.32	22	12	0.18	7	4	2	81.65	75.63	2.58	2.92	2.1	2.2	2.51	2.46	-3.48	0.0998	0.000333	Soluble	-4.17	0.0203	6.77e-05	Moderately soluble	-4.86	0.00414	1.38e-05	Moderately soluble	High	Yes	No	Yes	No	No	No	No	-6.05	0	0	0	0	0	0.55	0	0	0	2.5
DCM18767	NC(=O)C1CCN(CC1)[C@@H](/C(=N\C(=O)c1ccccc1)/Cc1ccccc1)O	C22H25N3O3	379.45	28	12	0.32	7	5	2	112.03	95.99	2.18	2.15	1.65	2.19	2.84	2.2	-3.4	0.15	0.000396	Soluble	-3.8	0.0604	0.000159	Soluble	-4.86	0.00527	1.39e-05	Moderately soluble	High	No	Yes	No	No	No	No	No	-7.09	0	0	0	0	0	0.55	0	1	1	4.1
DCM18900	O=C(c1ccc(c(c1)S(=O)(=O)N1CCCCC1)C)NCc1cccc(c1)C(F)(F)F	C21H23F3N2O3S	440.48	30	12	0.38	7	7	1	110.91	74.86	3.47	3.94	5.82	3.25	3.98	4.09	-4.89	0.00571	1.3e-05	Moderately soluble	-5.21	0.0027	6.14e-06	Moderately soluble	-7.13	3.29e-05	7.46e-08	Poorly soluble	High	No	No	No	Yes	Yes	Yes	Yes	-6.19	0	1	0	0	0	0.55	0	0	2	3.06
DCM18934	CC(C[C@H](C(=O)NC[C@@H]1CC[C@@H](CC1)C(=O)N[C@@H](C(=O)O)Cc1ccccc1)NC(=O)OC(C)(C)C)C	C28H43N3O6	517.66	37	6	0.64	16	6	4	142.53	133.83	3.56	4.32	3.66	2.17	3.64	3.47	-4.84	0.00757	1.46e-05	Moderately soluble	-6.84	7.41e-05	1.43e-07	Poorly soluble	-5.87	0.000706	1.36e-06	Moderately soluble	Low	No	Yes	No	No	No	No	Yes	-6.39	1	3	1	1	1	0.56	0	0	3	4.97
DCM19009	O=C([C@H]1CCCN1C(=O)OCc1ccccc1)N[C@H]([C@H](c1ccccc1)O)c1ccccc1	C27H28N2O4	444.52	33	18	0.26	10	4	2	129.37	78.87	3.26	3.86	3.2	2.82	3.65	3.36	-4.77	0.00752	1.69e-05	Moderately soluble	-5.21	0.00272	6.12e-06	Moderately soluble	-7.14	3.2e-05	7.19e-08	Poorly soluble	High	Yes	Yes	No	No	Yes	Yes	Yes	-6.27	0	0	0	0	0	0.55	0	0	3	4.15
DCM19037	CCN1C(=O)N[C@@H]([C@H](C1=C)C(=O)C)c1cccc(c1)C(F)(F)F	C16H17F3N2O2	326.31	23	6	0.38	4	5	1	86.59	49.41	2.49	2.26	3.58	2.64	3.09	2.81	-3.22	0.198	0.000608	Soluble	-2.93	0.38	0.00116	Soluble	-4.7	0.00654	2e-05	Moderately soluble	High	Yes	No	No	Yes	No	No	No	-6.69	0	0	0	0	0	0.55	0	0	0	3.44
DCM1911	CCO[C@@H](/C(=N\[C@@H](C(=O)N1CCC[C@H]1C(=O)O)C)/CCc1ccccc1)O	C20H28N2O5	376.45	27	6	0.55	10	6	2	106.5	99.43	2.68	1.86	1.5	0.92	2.69	1.93	-2.85	0.531	0.00141	Soluble	-3.57	0.101	0.00027	Soluble	-3.22	0.226	0.000601	Soluble	High	No	Yes	No	No	No	No	No	-7.28	0	0	0	0	0	0.56	0	2	2	4.22
DCM193	O=C(OC(C)(C)C)/N=C(/[C@@H](N1CCC(CC1)C(=O)N[C@H](C(=O)O)Cc1c[nH]c2c1cccc2)O)\Cc1ccccc1	C31H38N4O6	562.66	41	15	0.42	13	8	4	160.69	144.32	2.66	1.71	3.55	2.28	4.32	2.9	-3.82	0.0855	0.000152	Soluble	-4.36	0.0248	4.4e-05	Moderately soluble	-6.74	0.000103	1.82e-07	Poorly soluble	Low	No	Yes	No	No	No	No	No	-8.52	1	3	2	1	0	0.55	0	1	2	5.36
DCM1943	CC[C@@H](/C(=N\C(=O)[C@@H](n1c(=O)[nH]c2c(c1=O)cccc2)Cc1ccccc1)/[C@H](N1CCC[C@H]1C(=O)O)O)C	C28H32N4O6	520.58	38	16	0.39	10	8	3	148.58	145.06	3.8	1.18	1.97	2.27	3.69	2.58	-3.46	0.179	0.000345	Soluble	-3.82	0.0784	0.000151	Soluble	-5.42	0.00199	3.83e-06	Moderately soluble	Low	No	Yes	No	No	No	No	Yes	-8.64	1	2	1	1	0	0.55	0	1	2	5.32
DCM19604	OC/C(=N\C(=O)/C=C/[C@@H]([C@@H](N(Cc1ccccc1)Cc1ccccc1)O)N[C@H](OC(C)(C)C)O)/CC(C)C	C30H43N3O5	525.68	38	12	0.47	16	8	4	151.33	114.62	4.23	3.4	3.31	2.76	4.63	3.67	-4.42	0.02	3.81e-05	Moderately soluble	-5.49	0.00172	3.26e-06	Moderately soluble	-6.04	0.000479	9.12e-07	Poorly soluble	High	No	Yes	No	No	No	No	No	-7.09	1	3	1	0	1	0.55	0	3	2	5.77
DCM19640	O=C(N[C@@H]1CCC(=O)N(CC1)C[C@H](CSc1ccccc1)C)OCc1ccccc1	C24H30N2O3S	426.57	30	12	0.42	10	3	1	124.9	83.94	3.87	4.43	4.19	3.51	4.1	4.02	-4.91	0.00523	1.23e-05	Moderately soluble	-5.91	0.000524	1.23e-06	Moderately soluble	-6.97	4.52e-05	1.06e-07	Poorly soluble	High	No	No	No	Yes	Yes	Yes	Yes	-5.76	0	0	0	0	0	0.55	0	0	3	4.16
DCM19642	CCCCNC(=O)[C@H]1C[C@H]1[C@H]([C@@H](NC(=O)[C@H](NC(=O)OC(C)(C)C)COCc1ccccc1)CO)O	C26H41N3O7	507.62	36	6	0.65	19	7	5	134.55	146.22	3.43	1.34	1.34	0.27	2.7	1.81	-2.7	1.01	0.00199	Soluble	-4.01	0.0493	9.72e-05	Moderately soluble	-5.08	0.00419	8.26e-06	Moderately soluble	Low	No	Yes	No	No	No	No	No	-8.45	1	3	2	1	1	0.55	0	0	2	5.31
DCM20352	OC/C(=N\C(=O)/C=C/1\CCCCC[C@H](C(=O)OC[C@@H]2N([C@H]1O)CCC2)Cc1ccc(cc1)F)/Cc1ccccc1	C32H39FN2O5	550.66	40	12	0.47	7	8	2	156.79	99.43	4.25	4.8	4.44	3.82	5.39	4.54	-6.04	0.000504	9.16e-07	Poorly soluble	-6.62	0.000132	2.4e-07	Poorly soluble	-7.26	3.05e-05	5.53e-08	Poorly soluble	High	No	Yes	No	No	No	No	Yes	-6.25	1	3	0	0	0	0.55	0	2	2	6.1
DCM20357	OC/C(=N\C(=O)/C=C/1\CCCC/C(=C/C(=O)OC(C)(C)C)/[C@@H](OC[C@@H]2N([C@H]1O)CCC2)O)/Cc1ccccc1	C30H42N2O7	542.66	39	6	0.57	8	9	3	153.38	128.89	3.94	2.3	2.69	2.07	3.6	2.92	-4.24	0.0313	5.76e-05	Moderately soluble	-4.64	0.0123	2.27e-05	Moderately soluble	-4.25	0.0303	5.58e-05	Moderately soluble	High	No	Yes	No	No	No	No	No	-7.98	1	3	0	0	0	0.55	0	2	2	6.39
DCM20359	OC/C(=N\C(=O)/C=C/1\CCCC/C(=C/[C@@H](OC(C)(C)C)O)/C(=O)OC[C@H](N[C@H]1O)C)/Cc1ccccc1	C28H40N2O7	516.63	37	6	0.54	8	9	4	145.79	137.68	3.21	2.1	2.21	1.69	3.83	2.61	-3.96	0.0569	0.00011	Soluble	-4.62	0.0123	2.39e-05	Moderately soluble	-4.78	0.00865	1.67e-05	Moderately soluble	High	No	Yes	No	No	No	No	No	-7.96	1	3	0	1	0	0.55	0	3	2	6.02
DCM20364	OC/C(=N\C(=O)/C=C/1\CCCC/C(=C/C(=O)OC(C)(C)C)/[C@@H](OCCN[C@@H]1O)O)/Cc1ccccc1	C27H38N2O7	502.6	36	6	0.52	8	9	4	140.98	137.68	3.58	1.28	1.82	1.49	3.44	2.32	-3.36	0.22	0.000439	Soluble	-3.77	0.0852	0.00017	Soluble	-4.42	0.0192	3.83e-05	Moderately soluble	High	No	Yes	No	No	No	No	No	-8.46	1	3	0	1	0	0.55	0	2	2	5.73
DCM20374	OC[C@H](N1C[C@H](C)[C@H](CN(C(=O)NC(C)C)C)Oc2c(C1=O)cccc2NC(=O)C1CCCCC1)C	C27H42N4O5	502.65	36	6	0.67	10	5	3	144.38	111.21	3.64	3.12	2.9	2.04	2.22	2.78	-4.39	0.0207	4.12e-05	Moderately soluble	-5.12	0.00378	7.51e-06	Moderately soluble	-4.87	0.00676	1.35e-05	Moderately soluble	High	No	Yes	No	No	No	Yes	Yes	-7.15	1	3	0	0	0	0.55	0	0	2	5.01
DCM20394	OC[C@@H](N1C[C@@H](C)[C@H](CN(C(=O)Nc2c(C)noc2C)C)Oc2c(C1=O)cccc2NC(=O)NC(C)C)C	C26H38N6O6	530.62	38	11	0.54	11	7	4	146.87	149.27	3.16	1.67	2.44	1.25	1.24	1.95	-3.67	0.113	0.000214	Soluble	-4.42	0.0202	3.81e-05	Moderately soluble	-5.59	0.00137	2.59e-06	Moderately soluble	Low	No	Yes	No	No	No	No	Yes	-8.35	2	3	2	1	0	0.17	0	0	2	5.4
DCM20395	OC[C@@H](N1C[C@@H](C)[C@@H](CN(C(=O)NC(C)C)C)Oc2c(C1=O)cccc2NS(=O)(=O)c1ccccc1)C	C26H36N4O6S	532.65	37	12	0.46	10	6	3	145.26	136.66	2.97	2.38	3.27	1.44	1.03	2.22	-4.22	0.032	6e-05	Moderately soluble	-4.89	0.00685	1.29e-05	Moderately soluble	-5.89	0.000681	1.28e-06	Moderately soluble	Low	No	Yes	No	No	No	No	Yes	-7.86	1	3	0	1	0	0.55	0	0	2	4.99
DCM20399	COc1ccc(cc1)S(=O)(=O)N(C[C@H]1Oc2c(cccc2C(=O)N(C[C@@H]1C)[C@H](CO)C)NC(=O)Cc1ccccc1)C	C31H37N3O7S	595.71	42	18	0.35	11	8	2	163.44	133.86	3.59	3.32	3.93	1.66	2.71	3.04	-5.22	0.00362	6.08e-06	Moderately soluble	-5.81	0.000928	1.56e-06	Moderately soluble	-7.99	6.12e-06	1.03e-08	Poorly soluble	Low	No	Yes	No	No	No	Yes	Yes	-7.58	1	3	1	1	0	0.55	0	0	2	5.27
DCM20401	OC[C@H](N1C[C@@H](C)[C@@H](CN(C(=O)Nc2ccc(cc2)OC)C)Oc2c(CC1=O)cc(cc2)NC(=O)C1CC1)C	C29H38N4O6	538.64	39	12	0.48	11	6	3	152.65	120.44	3.84	2.16	2.53	1.7	2.24	2.5	-4.04	0.0489	9.08e-05	Moderately soluble	-4.32	0.0257	4.77e-05	Moderately soluble	-6.09	0.000435	8.07e-07	Poorly soluble	High	No	Yes	No	No	No	Yes	Yes	-8.05	1	3	1	0	0	0.55	0	0	2	5.38
DCM20430	OC[C@@H](N1C[C@@H](C)[C@@H](OCCCC[C@@H](Oc2c(C1=O)cc(cc2)NC(=O)NC1CCCCC1)C)CN(C(=O)C1CCCCC1)C)C	C36H58N4O6	642.87	46	6	0.75	10	6	3	186.62	120.44	4.55	5.49	5.4	2.97	3.64	4.41	-6.72	0.000122	1.9e-07	Poorly soluble	-7.78	1.07e-05	1.67e-08	Poorly soluble	-6.6	0.000163	2.53e-07	Poorly soluble	Low	No	Yes	No	No	No	No	Yes	-6.32	1	3	0	0	2	0.55	0	0	3	6.73
DCM20466	COc1ccc2c(c1)c1CCN3[C@](c1[nH]2)(CCc1ccccc1)[C@@H](C/C(=C\C(=O)NCc1ccc(c(c1)OC)OC)/[C@H]3O)C(=O)N1CCCCC1	C41H48N4O6	692.84	51	21	0.41	12	7	3	204.65	116.36	5.23	4.52	4.45	2.7	6.18	4.62	-6.5	0.000221	3.19e-07	Poorly soluble	-6.69	0.000143	2.06e-07	Poorly soluble	-10.41	2.68e-08	3.86e-11	Insoluble	High	No	Yes	No	Yes	No	Yes	Yes	-7.32	1	3	1	0	1	0.55	0	1	3	6.23
DCM20496	O=C(Nc1ccc(cc1)C(=O)N(Cc1ccccc1)C)Cc1ccc(cc1)NC(=O)[C@H]1CCCN(C1)C(=O)C1CCCC1	C35H40N4O4	580.72	43	18	0.37	13	4	2	172.79	98.82	4.31	4.32	4.59	3.41	4.79	4.29	-5.61	0.00141	2.43e-06	Moderately soluble	-6.11	0.000452	7.78e-07	Poorly soluble	-9.24	3.36e-07	5.79e-10	Poorly soluble	High	No	Yes	No	Yes	Yes	Yes	Yes	-6.78	1	3	1	0	0	0.55	0	0	3	4.21
DCM20663	CCN([C@@H](c1cc(CC(=O)NCc2cccc3c2cccc3)c(=O)n(c1C)Cc1ccc(cc1)OC)O)CC	C32H37N3O4	527.65	39	22	0.31	12	5	2	155.74	83.8	4.86	3.76	4.08	3.34	5.69	4.35	-5.11	0.00414	7.84e-06	Moderately soluble	-5.21	0.00323	6.13e-06	Moderately soluble	-9.73	9.85e-08	1.87e-10	Poorly soluble	High	No	Yes	No	Yes	Yes	Yes	Yes	-6.85	1	3	1	0	0	0.55	0	1	3	4.46
DCM20774	CC(NC(=O)c1noc(c1)[C@@H]1CCCCN1C(=O)CCCc1ccccc1)C	C22H29N3O3	383.48	28	11	0.5	9	4	1	111.92	75.44	4.11	3.24	3.18	2.31	3.79	3.33	-3.96	0.0425	0.000111	Soluble	-4.5	0.0122	3.18e-05	Moderately soluble	-6.17	0.000258	6.73e-07	Poorly soluble	High	Yes	Yes	No	Yes	Yes	Yes	Yes	-6.34	0	0	0	0	0	0.55	0	0	2	4.09
DCM20915	O=C([C@H]1C=NC(=O)S1)NCc1cccc(c1)C(F)(F)F	C12H9F3N2O2S	302.27	20	6	0.25	5	6	1	71.72	83.83	1.42	2.26	3.25	1.65	3.24	2.36	-3.03	0.282	0.000933	Soluble	-3.66	0.0666	0.00022	Soluble	-4.09	0.0246	8.13e-05	Moderately soluble	High	No	No	No	Yes	No	No	No	-6.54	0	0	0	0	0	0.55	0	1	0	3.37
DCM21004	O=C(Cc1cc([C@@H](N(C)C)O)c(n(c1=O)Cc1ccc(cc1)C(C)(C)C)C)NCc1cccc2c1cccc2	C33H39N3O3	525.68	39	22	0.33	10	4	2	158.9	74.57	4.3	4.73	4.59	4.06	6.23	4.78	-5.84	0.000766	1.46e-06	Moderately soluble	-6.03	0.000496	9.43e-07	Poorly soluble	-10.01	5.2e-08	9.89e-11	Insoluble	High	No	Yes	No	Yes	No	Yes	Yes	-6.15	1	3	0	0	0	0.55	0	1	3	4.58
DCM21297	C[C@H](Cc1ccccc1)NC(=O)CCCN1C(=O)c2c(C1=O)cccc2	C21H22N2O3	350.41	26	12	0.29	8	3	1	103.05	66.48	2.94	2.89	2.43	2.65	3.73	2.93	-3.65	0.079	0.000226	Soluble	-3.95	0.0397	0.000113	Soluble	-6.59	8.9e-05	2.54e-07	Poorly soluble	High	Yes	No	No	Yes	Yes	Yes	Yes	-6.39	0	0	0	0	0	0.55	0	1	2	2.78
DCM2130	CSCC/C(=N\C(=O)OC(C)(C)C)/[C@H](N1CCC(CC1)C(=O)N[C@H](C(=O)N[C@H](c1ccccc1)C)C)O	C27H42N4O5S	534.71	37	6	0.63	15	7	3	152.4	145.63	3.86	2.91	2.82	1.97	3.7	3.05	-4.12	0.0407	7.61e-05	Moderately soluble	-5.63	0.00126	2.35e-06	Moderately soluble	-5.32	0.00257	4.81e-06	Moderately soluble	Low	No	Yes	No	No	No	No	Yes	-7.5	1	3	2	1	0	0.55	0	1	2	5.52
DCM22061	O=C(Cc1ccc(cc1)F)NC1CCCC1	C13H16FNO	221.27	16	6	0.46	4	2	1	61.1	29.1	2.45	2.5	2.85	2.73	3.22	2.75	-2.8	0.35	0.00158	Soluble	-2.76	0.388	0.00175	Soluble	-4.25	0.0126	5.68e-05	Moderately soluble	High	Yes	No	Yes	No	No	Yes	No	-5.87	0	0	0	0	0	0.55	0	0	1	1.57
DCM22284	CCc1cccc(c1)NC(=O)C1CCCC1	C14H19NO	217.31	16	6	0.5	4	1	1	67.64	29.1	2.94	3.81	3.19	2.86	3.31	3.22	-3.6	0.0544	0.000251	Soluble	-4.12	0.0166	7.66e-05	Moderately soluble	-4.35	0.00962	4.43e-05	Moderately soluble	High	Yes	No	Yes	Yes	No	Yes	No	-4.92	0	0	0	0	0	0.55	0	0	2	1.6
DCM2230	COc1ccc(cc1)C[C@@H](C(=O)NC1CCN(CC1)C(=O)c1cc(OC)c(c(c1)OC)OC)NC(=O)C	C27H35N3O7	513.58	37	12	0.44	13	7	2	141.05	115.43	3.73	2.47	1.81	0.76	3.18	2.39	-3.96	0.056	0.000109	Soluble	-4.54	0.0149	2.9e-05	Moderately soluble	-6.52	0.000157	3.05e-07	Poorly soluble	High	No	Yes	No	No	No	Yes	Yes	-7.68	1	3	1	0	0	0.55	0	0	2	4.16
DCM22786	COc1ccc(cc1)CNC(=O)C1CCN(CC1)C(=O)c1cccc(c1)Cl	C21H23ClN2O3	386.87	27	12	0.33	7	3	1	109.17	58.64	3.37	3.25	2.98	2.81	3.75	3.23	-4.15	0.0272	7.03e-05	Moderately soluble	-4.16	0.0271	7e-05	Moderately soluble	-6.44	0.000141	3.64e-07	Poorly soluble	High	Yes	No	No	Yes	Yes	Yes	Yes	-6.35	0	0	0	0	0	0.55	0	0	1	2.7
DCM2279	CSCC/C(=N/C(=O)OC(C)(C)C)/[C@@H](N1CCC(CC1)C(=O)N[C@@H](C(=O)O)Cc1c[nH]c2c1cccc2)O	C27H38N4O6S	546.68	38	9	0.56	14	8	4	153.41	169.62	3.09	0.7	3.06	1.72	3.77	2.47	-2.92	0.655	0.0012	Soluble	-3.84	0.0791	0.000145	Soluble	-5.14	0.00392	7.16e-06	Moderately soluble	Low	No	Yes	No	No	No	No	No	-9.14	1	3	2	1	1	0.55	0	1	2	5.28
DCM23269	COc1ccccc1CNC(=O)CC1=NC(=O)NC(=O)C1	C14H15N3O4	289.29	21	6	0.29	6	5	2	82.15	96.86	1.5	0.32	-0.13	0.47	2.04	0.84	-1.65	6.47	0.0224	Very soluble	-1.92	3.5	0.0121	Very soluble	-4.3	0.0145	5e-05	Moderately soluble	High	No	No	No	No	No	No	No	-7.84	0	0	0	0	0	0.55	0	0	0	2.8
DCM2376	Fc1ccc(cc1)CNC(=O)c1ccc2c(c1)nc1n(c2=O)CCCCC1	C21H20FN3O2	365.4	27	16	0.29	4	4	1	101.98	63.99	3.3	2.87	3.46	3.59	4.01	3.45	-4.09	0.0298	8.16e-05	Moderately soluble	-3.87	0.0489	0.000134	Soluble	-6.95	4.11e-05	1.12e-07	Poorly soluble	High	Yes	Yes	Yes	Yes	Yes	Yes	Yes	-6.49	0	0	0	0	0	0.55	0	0	1	2.91
DCM2441	Fc1ccc(cc1)CNC(=O)c1cc2n(n1)cccc2	C15H12FN3O	269.27	20	15	0.07	4	3	1	72.63	46.4	2.92	2.27	2.67	2.73	2.31	2.58	-3.23	0.158	0.000588	Soluble	-2.88	0.354	0.00131	Soluble	-5.29	0.00139	5.15e-06	Moderately soluble	High	Yes	No	Yes	Yes	No	Yes	No	-6.33	0	0	0	0	0	0.55	0	0	0	1.97
DCM24561	O=C(NC(=O)NC(C)(C)C)CO[C@H](c1cn(c(c1)O)Cc1ccccc1)O	C19H25N3O5	375.42	27	11	0.37	10	5	4	99.5	112.82	2.8	1.82	1.55	1.13	1.01	1.66	-2.96	0.416	0.00111	Soluble	-3.81	0.0583	0.000155	Soluble	-3.9	0.0472	0.000126	Soluble	High	No	Yes	No	No	No	No	No	-7.3	0	0	0	0	0	0.55	0	1	2	3.55
DCM2475	CSCC/C(=N\C(=O)OC(C)(C)C)/[C@H](N1CCC(CC1)C(=O)NCC(=O)Nc1ccc(cc1)C)O	C25H38N4O5S	506.66	35	6	0.6	14	7	3	144.48	145.63	4.27	2.53	2.64	1.83	3.33	2.92	-3.78	0.0845	0.000167	Soluble	-5.23	0.00295	5.82e-06	Moderately soluble	-5.27	0.00271	5.35e-06	Moderately soluble	Low	No	Yes	No	No	No	No	Yes	-7.59	1	3	2	1	0	0.55	0	1	2	4.97
DCM2478	CC(C/C(=N/C(=O)[C@@H](n1c(=O)[nH]c2c(c1=O)cccc2)Cc1ccccc1)/[C@@H](N1CCC[C@@H]1C(=O)O)O)C	C28H32N4O6	520.58	38	16	0.39	10	8	3	148.58	145.06	3.56	1.05	1.97	2.27	3.69	2.51	-3.38	0.217	0.000416	Soluble	-3.69	0.107	0.000206	Soluble	-5.42	0.00199	3.83e-06	Moderately soluble	Low	No	Yes	No	No	No	No	Yes	-8.73	1	2	1	1	0	0.55	0	1	2	5.18
DCM24841	COCCN([C@H](c1ccccc1)C(=O)NC1CCCC1)[C@@H](/C=N/C(=O)c1ccco1)O	C23H29N3O5	427.49	31	11	0.43	12	7	2	115.98	104.37	3.73	2.52	2.23	0.86	2.95	2.46	-3.55	0.121	0.000283	Soluble	-4.36	0.0187	4.39e-05	Moderately soluble	-5.02	0.00407	9.53e-06	Moderately soluble	High	No	Yes	No	No	Yes	Yes	No	-7.12	0	0	1	0	0	0.55	0	2	2	4.58
DCM25237	CCC[C@H](NC(=O)CSc1nc(cn1N)c1ccccc1)C	C16H22N4OS	318.44	22	11	0.38	8	2	2	91.37	98.24	2.9	3.3	2.67	2.09	2.1	2.61	-3.74	0.0586	0.000184	Soluble	-5.04	0.00291	9.15e-06	Moderately soluble	-4.7	0.00641	2.01e-05	Moderately soluble	High	No	No	Yes	Yes	Yes	No	No	-5.9	0	0	0	0	0	0.55	0	0	1	3.42
DCM25329	Oc1nc2ccccc2c(c1)C(=O)NCc1ccc2c(c1)OCO2	C18H14N2O4	322.31	24	16	0.11	4	5	2	87.31	80.68	2.69	2.75	2.45	1.92	2.84	2.53	-3.8	0.0511	0.000158	Soluble	-4.1	0.0257	7.96e-05	Moderately soluble	-5.78	0.000536	1.66e-06	Moderately soluble	High	No	Yes	Yes	No	Yes	Yes	Yes	-6.31	0	0	0	0	0	0.55	0	0	0	2.4
DCM25561	COc1ccccc1CNC(=O)c1ccc2c(c1)[nH]c(=S)n(c2=O)C[C@H]1CCCO1	C22H23N3O4S	425.5	30	16	0.32	7	4	2	116.83	117.44	3.12	2.38	3.02	2.02	4.83	3.08	-3.91	0.0523	0.000123	Soluble	-4.49	0.0139	3.26e-05	Moderately soluble	-6.49	0.000137	3.21e-07	Poorly soluble	High	No	Yes	Yes	Yes	Yes	Yes	Yes	-7.21	0	0	0	0	0	0.55	0	1	1	3.63
DCM25687	Brc1ccc2c(c1)c(cc(n2)O)C(=O)N[C@@H](c1ccccc1)C	C18H15BrN2O2	371.23	23	16	0.11	4	3	2	93.76	62.22	3.05	4.03	3.87	3.24	3.85	3.61	-4.93	0.00435	1.17e-05	Moderately soluble	-5.04	0.00339	9.13e-06	Moderately soluble	-6.88	4.94e-05	1.33e-07	Poorly soluble	High	Yes	No	Yes	Yes	Yes	Yes	Yes	-5.7	0	0	0	0	0	0.55	0	0	2	2.54
DCM25738	O=C(N[C@@H](c1ccccc1)C)COC(=O)CN1C(=O)[C@@H]2[C@@H](C1=O)CCCC2	C20H24N2O5	372.41	27	6	0.5	8	5	1	101.17	92.78	2.94	1.95	0.88	1.24	2.12	1.83	-3.01	0.361	0.000968	Soluble	-3.52	0.112	0.0003	Soluble	-4.15	0.0265	7.11e-05	Moderately soluble	High	No	No	Yes	No	No	No	No	-7.19	0	0	0	0	0	0.55	0	1	2	3.43
DCM25765	CC[C@H](c1ccccc1)NC(=O)C1CCCC1	C15H21NO	231.33	17	6	0.53	5	1	1	70.75	29.1	2.84	3.5	3.12	2.85	3.37	3.14	-3.41	0.0899	0.000389	Soluble	-3.79	0.0372	0.000161	Soluble	-4.4	0.00915	3.95e-05	Moderately soluble	High	Yes	No	No	Yes	No	Yes	No	-5.23	0	0	0	0	0	0.55	0	0	1	1.96
DCM2585	O[C@H]1CN([C@H](C1)C(=O)Nc1cc(C)ccc1C)C(=O)OCc1ccccc1	C21H24N2O4	368.43	27	12	0.33	7	4	2	106.74	78.87	2.86	2.8	2.29	2.05	2.5	2.5	-3.76	0.0647	0.000176	Soluble	-4.11	0.0284	7.71e-05	Moderately soluble	-5.14	0.00267	7.24e-06	Moderately soluble	High	No	Yes	No	No	Yes	Yes	No	-6.56	0	0	0	0	0	0.55	0	0	1	3.74
DCM2598	COc1cc(ccc1OC)C[C@H](C(=O)NC1CCN(CC1)S(=O)(=O)c1cccc2c1cccc2)NC(=O)C	C28H33N3O6S	539.64	38	16	0.36	11	7	2	148.48	122.42	3.85	3.47	3.57	1.35	2.95	3.04	-4.96	0.00595	1.1e-05	Moderately soluble	-5.72	0.00102	1.89e-06	Moderately soluble	-7.88	7.1e-06	1.32e-08	Poorly soluble	High	No	Yes	No	Yes	Yes	Yes	Yes	-7.13	1	3	1	0	0	0.55	0	0	2	4.45
DCM26048	O=C([C@@H](N1CCN(CC1)c1ccc(cc1)F)C)NCc1ccccc1	C20H24FN3O	341.42	25	12	0.35	6	3	1	104.57	35.58	3.38	3.2	2.16	2.71	3.04	2.9	-3.93	0.0399	0.000117	Soluble	-3.62	0.0821	0.00024	Soluble	-5.78	0.000564	1.65e-06	Moderately soluble	High	Yes	No	No	No	No	Yes	Yes	-6.11	0	0	0	0	0	0.55	0	0	0	2.63
DCM26057	COc1ccc(cc1)[C@@]1(C)NC(=O)N(C1=O)CC(=O)NC1CC1	C16H19N3O4	317.34	23	6	0.44	6	4	2	89.33	87.74	2.16	0.89	-0.19	0.65	1.25	0.95	-2.17	2.17	0.00684	Soluble	-2.32	1.53	0.00482	Soluble	-3.88	0.0416	0.000131	Soluble	High	No	Yes	No	No	No	No	No	-7.6	0	0	0	0	0	0.55	0	1	0	2.75
DCM26062	O=C([C@H](N1C(=O)c2c(C1=O)cccc2)C)NCc1cccc(c1)Cl	C18H15ClN2O3	342.78	24	12	0.17	5	3	1	93.64	66.48	2.76	2.77	2.11	2.47	3.2	2.66	-3.75	0.0609	0.000178	Soluble	-3.82	0.0517	0.000151	Soluble	-6	0.000341	9.95e-07	Poorly soluble	High	Yes	No	No	Yes	Yes	Yes	Yes	-6.42	0	0	0	0	0	0.55	0	1	0	2.56
DCM26714	COc1ccc(cc1)S(=O)(=O)N1CCC(CC1)C(=O)N[C@H](CCc1ccccc1)C	C23H30N2O4S	430.56	30	12	0.43	9	5	1	121.48	84.09	3.62	3.56	3.93	2.27	3.03	3.28	-4.45	0.0151	3.51e-05	Moderately soluble	-5.01	0.0042	9.74e-06	Moderately soluble	-6.6	0.000108	2.51e-07	Poorly soluble	High	No	No	No	Yes	Yes	Yes	Yes	-6.4	0	0	0	0	0	0.55	0	0	3	3.79
DCM26981	O=C([C@H](NC(=O)[C@H]1Cc2ccccc2CN1C(=O)OC(C)(C)C)C)NC1CCCCC1	C24H35N3O4	429.55	31	6	0.62	9	4	2	123.58	87.74	4.2	3.58	2.77	2.19	2.75	3.1	-4.31	0.0211	4.92e-05	Moderately soluble	-5.11	0.00334	7.79e-06	Moderately soluble	-5	0.00429	9.98e-06	Moderately soluble	High	No	Yes	No	No	Yes	Yes	Yes	-6.38	0	0	0	0	0	0.55	0	0	3	4.17
DCM27691	COc1ccc(cc1)Cn1c(=O)[nH]c2c(c1=O)ccc(c2)C(=O)NCCCN1CCCCCC1	C26H32N4O4	464.56	34	16	0.42	9	5	2	137.22	96.43	3.87	2.97	2.36	2.47	4.17	3.17	-4.35	0.021	4.51e-05	Moderately soluble	-4.66	0.0102	2.2e-05	Moderately soluble	-7.45	1.67e-05	3.59e-08	Poorly soluble	High	No	Yes	No	Yes	Yes	Yes	Yes	-7.03	0	1	0	0	0	0.55	0	0	2	3.25
DCM27955	Cc1ccc(c(c1)S(=O)(=O)N1CCN(CC1)[C@H](/C(=N\C(=O)c1ccco1)/Cc1ccccc1)O)C	C26H29N3O5S	495.59	35	17	0.31	8	8	1	141.13	111.8	3.85	3.52	3.36	1.87	3.37	3.19	-4.96	0.00541	1.09e-05	Moderately soluble	-5.55	0.00139	2.81e-06	Moderately soluble	-6.87	6.64e-05	1.34e-07	Poorly soluble	High	No	No	No	No	Yes	Yes	Yes	-6.82	0	2	0	0	0	0.55	0	1	3	4.62
DCM28032	COc1ccc(cc1)CNC(=O)[C@@H](C(C)C)NC(=O)C1CCN(CC1)C(=O)[C@H]1CCCN1C(=O)OC(C)(C)C	C29H44N4O6	544.68	39	6	0.66	14	6	2	156.16	117.28	4.22	3.11	2.18	1.46	2.85	2.76	-4.37	0.0234	4.3e-05	Moderately soluble	-5.24	0.00312	5.74e-06	Moderately soluble	-5.13	0.00406	7.45e-06	Moderately soluble	High	No	Yes	No	No	No	No	Yes	-7.41	1	3	1	0	0	0.55	0	0	2	4.81
DCM28033	CSCCC(=N)[C@@H](N1CCC(CC1)C(=O)N[C@H](C(=O)NCc1ccc(cc1)OC)C(C)C)O	C24H38N4O4S	478.65	33	6	0.62	14	6	4	137.86	140.05	3.75	2.08	1.72	0.86	3.16	2.31	-3.33	0.225	0.000469	Soluble	-4.65	0.0107	2.24e-05	Moderately soluble	-5.02	0.00461	9.64e-06	Moderately soluble	High	No	Yes	No	No	No	No	No	-7.74	0	2	2	1	0	0.55	0	1	2	4.47
DCM28034	C[C@@H]([C@H](C(=O)O)NC(=O)C1CCN(CC1)[C@H](/C(=N\C(=O)OC(C)(C)C)/Cc1ccccc1)O)O	C24H35N3O7	477.55	34	6	0.58	12	9	4	130.32	148.76	2.91	-0.62	1.21	0.99	1.91	1.28	-1.75	8.52	0.0178	Very soluble	-2.03	4.44	0.00929	Soluble	-2.89	0.611	0.00128	Soluble	Low	No	Yes	No	No	No	No	No	-9.65	0	1	2	1	0	0.55	0	1	2	5.19
DCM28724	CC(NC(=O)C1CCN(CC1)Cc1cccc(c1)Oc1ccccc1)C	C22H28N2O2	352.47	26	12	0.41	7	3	1	108.89	41.57	3.86	3.86	3.68	3.04	3.79	3.65	-4.34	0.0162	4.61e-05	Moderately soluble	-4.43	0.0131	3.72e-05	Moderately soluble	-6.33	0.000163	4.62e-07	Poorly soluble	High	Yes	No	No	Yes	No	Yes	Yes	-5.71	0	0	0	0	0	0.55	0	0	2	2.87
DCM28770	CC[C@@H]([C@@H](C(=O)NC[C@@H]1CC[C@H](CC1)C(=O)N[C@@H](C(=O)O)Cc1ccccc1)N)C	C23H35N3O4	417.54	30	6	0.61	12	5	4	116.69	121.52	2.97	0.4	2.09	1.57	2.68	1.94	-2.04	3.84	0.00919	Soluble	-2.52	1.27	0.00303	Soluble	-4.66	0.00913	2.19e-05	Moderately soluble	High	No	Yes	No	No	No	No	No	-8.56	0	0	1	0	0	0.55	0	0	2	4.09
DCM28813	Fc1cccc(c1)C(=O)Nc1cc2c(cc1N1CCCC1)n(c(=O)n2C)C	C20H21FN4O2	368.4	27	15	0.3	4	3	1	107.54	59.27	3.04	2.48	2.72	3.13	2.41	2.75	-3.83	0.054	0.000147	Soluble	-3.37	0.157	0.000427	Soluble	-5.13	0.00272	7.38e-06	Moderately soluble	High	Yes	Yes	No	No	Yes	Yes	No	-6.79	0	0	0	0	0	0.55	0	0	1	2.65
DCM28859	O=C([C@H]1CCC(=O)N(C1)CCc1ccccc1)NCc1ccc(c(c1)F)F	C21H22F2N2O2	372.41	27	12	0.33	7	4	1	102.17	49.41	3.11	2.72	3.37	3.37	4.44	3.4	-3.73	0.0694	0.000186	Soluble	-3.41	0.144	0.000388	Soluble	-7.01	3.61e-05	9.68e-08	Poorly soluble	High	Yes	Yes	No	Yes	No	Yes	Yes	-6.64	0	0	0	0	0	0.55	0	0	1	2.89
DCM28933	O=C(N[C@H]1CCC(=O)N(CC1)[C@@H](Cc1ccccc1)CSc1ccccc1)OCc1ccccc1	C29H32N2O3S	488.64	35	18	0.31	11	3	1	144.58	83.94	4.17	5.65	5.16	4.29	5.16	4.89	-6.08	0.000403	8.25e-07	Poorly soluble	-7.18	3.25e-05	6.65e-08	Poorly soluble	-9.04	4.45e-07	9.1e-10	Poorly soluble	High	No	Yes	No	Yes	Yes	Yes	Yes	-5.27	1	2	1	0	1	0.55	0	0	3	4.55
DCM29402	C[C@H](NC(=O)[C@H](O[C@@H](/C=N/C(=O)c1ccccc1C)O)C)CCc1ccccc1	C23H28N2O4	396.48	29	12	0.35	11	5	2	113.48	87.99	3.43	3.63	3.07	2.8	4.61	3.51	-4.17	0.0271	6.83e-05	Moderately soluble	-5.17	0.00271	6.83e-06	Moderately soluble	-6.16	0.000272	6.85e-07	Poorly soluble	High	No	Yes	No	No	No	No	Yes	-6.14	0	0	1	0	0	0.55	0	2	3	4.28
DCM29531	OC/C(=N\C(=O)/C=C/1\CCCC/C(=C/[C@@H](OC(C)(C)C)O)/C(=O)OC[C@H](N[C@H]1O)C)/Cc1ccccc1	C28H40N2O7	516.63	37	6	0.54	8	9	4	145.79	137.68	3.21	2.1	2.21	1.69	3.83	2.61	-3.96	0.0569	0.00011	Soluble	-4.62	0.0123	2.39e-05	Moderately soluble	-4.78	0.00865	1.67e-05	Moderately soluble	High	No	Yes	No	No	No	No	No	-7.96	1	3	0	1	0	0.55	0	3	2	6.02
DCM29532	OC/C(=N\C(=O)/C=C/1\CCCC/C(=C/C(=O)OC(C)(C)C)/[C@@H](O[C@@H](CN[C@H]1O)c1ccccc1)O)/Cc1ccccc1	C33H42N2O7	578.7	42	12	0.42	9	9	4	165.47	137.68	4.11	2.81	3.24	2.42	4.63	3.44	-4.82	0.00885	1.53e-05	Moderately soluble	-5.36	0.00254	4.38e-06	Moderately soluble	-6.61	0.000142	2.45e-07	Poorly soluble	Low	No	Yes	No	No	No	No	No	-7.83	1	3	0	1	0	0.55	0	2	2	6.3
DCM29534	OC/C(=N\C(=O)/C=C/1\CCCC/C(=C/C(=O)OC(C)(C)C)/[C@H](OC[C@H](N[C@@H]1O)C(C)(C)C)O)/Cc1ccccc1	C31H46N2O7	558.71	40	6	0.58	9	9	4	159.95	137.68	4.64	3.07	3.23	2.26	4.49	3.54	-4.76	0.00982	1.76e-05	Moderately soluble	-5.63	0.00132	2.35e-06	Moderately soluble	-5.33	0.00262	4.69e-06	Moderately soluble	Low	No	Yes	No	No	No	No	Yes	-7.53	1	3	0	1	0	0.55	0	2	2	6.45
DCM29547	OC[C@@H](N1C[C@H](C)[C@@H](CN(C(=O)Nc2ccc(cc2)F)C)Oc2c(CC1=O)cc(cc2)NC(=O)NC1CCCCC1)C	C31H42FN5O5	583.69	42	12	0.52	11	6	4	163.72	123.24	3.87	3.47	4.25	2.99	2.53	3.42	-5.13	0.00432	7.41e-06	Moderately soluble	-5.74	0.00106	1.82e-06	Moderately soluble	-7.08	4.9e-05	8.39e-08	Poorly soluble	High	No	Yes	No	No	No	No	Yes	-7.4	1	3	1	0	0	0.55	0	0	2	5.68
DCM29556	OC[C@@H](N1C[C@H](C)[C@H](CN(C(=O)NC(C)C)C)Oc2c(C1=O)cc(cc2)NS(=O)(=O)c1ccccc1)C	C26H36N4O6S	532.65	37	12	0.46	10	6	3	145.26	136.66	2.24	2.38	3.27	1.44	1.03	2.07	-4.22	0.032	6e-05	Moderately soluble	-4.89	0.00685	1.29e-05	Moderately soluble	-5.89	0.000681	1.28e-06	Moderately soluble	Low	No	Yes	No	No	No	No	Yes	-7.86	1	3	0	1	0	0.55	0	0	2	4.85
DCM29571	OC[C@@H](N1C[C@H](C)[C@@H](CN(CC2CCCCC2)C)Oc2c(CC1=O)cc(cc2)NC(=O)Nc1c(C)noc1C)C	C30H45N5O5	555.71	40	11	0.63	10	7	3	160.37	120.17	3.82	3.89	3.83	2.15	3.2	3.38	-5.28	0.00292	5.25e-06	Moderately soluble	-6.11	0.00043	7.74e-07	Poorly soluble	-6.85	7.8e-05	1.4e-07	Poorly soluble	High	No	Yes	No	No	No	No	Yes	-6.93	1	3	0	0	0	0.55	0	0	3	6.13
DCM29666	COc1ccc2c(c1)c1CCN3[C@](c1[nH]2)(CCc1ccccc1)[C@@H](C/C(=C\C(=O)NCCc1ccccn1)/[C@@H]3O)C(=O)N1CCCCC1	C39H45N5O4	647.81	48	21	0.41	11	6	3	194.26	110.79	4.55	4.01	4.02	2.59	5.83	4.2	-5.98	0.000678	1.05e-06	Moderately soluble	-6.04	0.000592	9.14e-07	Poorly soluble	-10.26	3.6e-08	5.56e-11	Insoluble	High	No	Yes	No	Yes	No	Yes	Yes	-7.4	1	3	1	0	1	0.55	0	1	3	5.98
DCM29774	O=C(Cc1cc([C@@H](N(C)C)O)c(n(c1=O)Cc1ccccc1)C)NC1CC1	C21H27N3O3	369.46	27	12	0.43	8	4	2	105.14	74.57	3.02	0.87	1.19	2.05	2.68	1.96	-2.48	1.22	0.00331	Soluble	-2.02	3.53	0.00955	Soluble	-4.95	0.00413	1.12e-05	Moderately soluble	High	No	Yes	No	No	No	No	No	-7.94	0	0	0	0	0	0.55	0	1	2	3.64
DCM29793	OC[C@@H](N1C[C@@H](C)[C@H](OCc2c(c3c(C1=O)n(C)c1c3cccc1)cccc2)CN(C(=O)Nc1c(C)noc1C)C)C	C32H39N5O5	573.68	42	20	0.41	7	6	2	166.31	113.07	3.93	3.58	4.25	2.16	3.24	3.43	-5.54	0.00164	2.87e-06	Moderately soluble	-5.64	0.00131	2.29e-06	Moderately soluble	-7.9	7.19e-06	1.25e-08	Poorly soluble	High	No	Yes	No	No	No	Yes	Yes	-7.26	1	3	0	0	0	0.55	0	0	2	6.08
DCM29815	CCOC(=O)CCCCCC(=O)Nc1ccc2c(c1)C(=O)N(C[C@@H](C)[C@H](OCCCC[C@@H](O2)C)CN(C(=O)c1ccncc1)C)[C@@H](CO)C	C37H54N4O8	682.85	49	12	0.59	16	9	2	192.22	147.6	4.3	3.74	4.53	1.59	4.62	3.76	-5.56	0.0019	2.79e-06	Moderately soluble	-6.53	0.000201	2.94e-07	Poorly soluble	-8.27	3.71e-06	5.43e-09	Poorly soluble	Low	No	Yes	No	No	No	No	Yes	-7.81	2	3	2	1	2	0.17	0	0	3	6.59
DCM29840	O=C(Cc1cc([C@@H](N(C(C)C)C(C)C)O)c(n(c1=O)Cc1ccccc1)C)NCCCCc1ccccc1	C32H43N3O3	517.7	38	18	0.44	14	4	2	155.77	74.57	4.71	4.58	4.67	4.05	6.27	4.86	-5.36	0.00225	4.35e-06	Moderately soluble	-5.87	0.000699	1.35e-06	Moderately soluble	-9.21	3.16e-07	6.11e-10	Poorly soluble	High	No	Yes	No	Yes	No	Yes	Yes	-6.21	1	3	1	0	0	0.55	0	1	3	4.68
DCM30263	O=C(Cc1cc([C@@H](N(C(C)C)C(C)C)O)c(n(c1=O)Cc1ccccc1)C)NCc1cccc2c1cccc2	C33H39N3O3	525.68	39	22	0.33	11	4	2	158.86	74.57	4.25	4.66	4.85	4.06	6.08	4.78	-5.73	0.000987	1.88e-06	Moderately soluble	-5.95	0.000586	1.11e-06	Moderately soluble	-9.67	1.13e-07	2.16e-10	Poorly soluble	High	No	Yes	No	Yes	No	Yes	Yes	-6.2	1	3	1	0	0	0.55	0	1	3	4.58
DCM30268	O=C(Cc1cc([C@H](N2CCCCCC2)O)c(n(c1=O)Cc1ccccc1)C)NCCc1ccccn1	C29H36N4O3	488.62	36	18	0.41	10	5	2	145.75	87.46	3.58	2.44	2.66	2.68	4.66	3.21	-4.12	0.0374	7.64e-05	Moderately soluble	-3.92	0.0588	0.00012	Soluble	-8.09	4.01e-06	8.2e-09	Poorly soluble	High	No	Yes	No	No	No	Yes	Yes	-7.55	0	3	0	0	0	0.55	0	0	2	4.38
DCM30269	CC(C[C@H]1CN([C@H](Cc2ccccc2)CN2CCC[C@@H]2CN2[C@H](CNC(=O)C2=O)Cc2ccc(cc2)O)C(=O)C(=O)N1CCc1ccccc1)C	C41H51N5O5	693.87	51	18	0.46	14	6	2	216.58	113.5	3.84	6.36	1.76	2.37	5.06	3.88	-7.49	2.27e-05	3.27e-08	Poorly soluble	-8.53	2.03e-06	2.92e-09	Poorly soluble	-9.71	1.34e-07	1.93e-10	Poorly soluble	High	No	Yes	No	No	No	Yes	Yes	-6.02	1	3	1	0	2	0.55	0	1	3	5.45
DCM30333	CN([C@@H](C(=O)Nc1ccc2c(c1)OCCO2)CCc1ccccc1)CCc1ccccc1	C27H30N2O3	430.54	32	18	0.3	10	4	1	127.53	50.8	4.12	5.19	4.38	3.29	5.11	4.42	-5.54	0.00126	2.92e-06	Moderately soluble	-6	0.000427	9.92e-07	Poorly soluble	-8.75	7.67e-07	1.78e-09	Poorly soluble	High	Yes	Yes	No	Yes	Yes	Yes	Yes	-5.24	0	0	0	0	1	0.55	0	0	3	3.76
DCM30682	C/C(=N\C(=O)[C@H]1CCCN1C(=O)OC(C)(C)C)/[C@H](OCc1ccccc1)O	C20H28N2O5	376.45	27	6	0.55	9	6	1	106.44	88.43	3.78	2.27	2.38	1.73	2.69	2.57	-3.17	0.252	0.000669	Soluble	-3.76	0.0648	0.000172	Soluble	-3.5	0.119	0.000316	Soluble	High	No	No	No	No	No	No	No	-6.98	0	0	0	0	0	0.55	0	2	2	4.22
DCM30732	O[C@H]1C[C@@H](N(C1)C(=O)OCc1ccccc1)C(=O)Nc1ccc(cc1C)C	C21H24N2O4	368.43	27	12	0.33	7	4	2	106.74	78.87	3.51	2.8	2.29	2.05	2.5	2.63	-3.76	0.0647	0.000176	Soluble	-4.11	0.0284	7.71e-05	Moderately soluble	-5.14	0.00267	7.24e-06	Moderately soluble	High	No	Yes	No	No	Yes	Yes	No	-6.56	0	0	0	0	0	0.55	0	0	1	3.73
DCM30886	O=C(C1CCN(CC1)C(=O)NCc1ccccc1)NCc1ccc(cc1)F	C21H24FN3O2	369.43	27	12	0.33	8	3	2	105.4	61.44	3.13	2.41	2.8	2.97	3.08	2.88	-3.45	0.131	0.000355	Soluble	-3.34	0.168	0.000455	Soluble	-6.44	0.000133	3.6e-07	Poorly soluble	High	Yes	Yes	No	Yes	No	Yes	Yes	-6.84	0	0	0	0	0	0.55	0	0	2	2.87
DCM32253	Fc1ccc(cc1)CNC(=O)c1cnn(c1)C	C12H12FN3O	233.24	17	11	0.17	4	3	1	60.93	46.92	2.07	1.1	1.76	1.61	1.79	1.66	-2.19	1.49	0.0064	Soluble	-1.68	4.9	0.021	Very soluble	-4.01	0.023	9.86e-05	Moderately soluble	High	Yes	No	Yes	No	No	No	No	-6.94	0	0	0	0	0	0.55	0	0	1	1.65
DCM32426	O=C(CNC(=O)c1cccc(c1)Br)NCCc1nc2c([nH]1)cccc2	C18H17BrN4O2	401.26	25	15	0.17	8	3	3	98.7	86.88	2.64	2.79	2.41	1.96	3.55	2.67	-4	0.04	9.97e-05	Moderately soluble	-4.27	0.0215	5.36e-05	Moderately soluble	-7.42	1.54e-05	3.84e-08	Poorly soluble	High	No	No	Yes	Yes	Yes	Yes	Yes	-6.77	0	0	0	0	0	0.55	0	0	2	2.3
DCM32428	Cc1ccc(cc1)CNC(=O)[C@@H](NC(=O)C1CCNCC1)Cc1ccccc1	C23H29N3O2	379.5	28	12	0.39	9	3	3	114.73	70.23	3.18	2.76	1.81	2.22	3.86	2.76	-3.65	0.084	0.000221	Soluble	-3.89	0.0489	0.000129	Soluble	-7.31	1.87e-05	4.92e-08	Poorly soluble	High	Yes	Yes	No	No	No	Yes	Yes	-6.66	0	0	0	0	0	0.55	0	0	2	3.06
DCM32890	O=C(CN1C(=O)NC2(C1=O)CCCCCCC2)NCc1ccc(cc1)F	C19H24FN3O3	361.41	26	6	0.53	5	4	2	102.18	78.51	2.88	2.76	1.98	1.87	2.61	2.42	-3.66	0.079	0.000219	Soluble	-4.06	0.0312	8.63e-05	Moderately soluble	-5.37	0.00154	4.27e-06	Moderately soluble	High	No	Yes	No	No	Yes	No	No	-6.55	0	0	0	0	0	0.55	0	1	1	3.04
DCM33486	OCC(NC(=O)[C@@H](N1C(=O)c2c(C1=O)cccc2)Cc1ccccc1)(C)C	C21H22N2O4	366.41	27	12	0.29	7	4	2	104.25	86.71	2.62	2.17	1.4	1.84	2.8	2.17	-3.35	0.165	0.000451	Soluble	-3.62	0.0871	0.000238	Soluble	-5.63	0.000849	2.32e-06	Moderately soluble	High	No	Yes	No	No	No	No	No	-6.99	0	0	0	0	0	0.55	0	1	1	2.93
DCM33835	C[C@@H](Cc1ccccc1)NC(=O)CN1CCCC1=O	C15H20N2O2	260.33	19	6	0.47	6	2	1	77.76	49.41	2.31	1.25	0.98	1.44	2.33	1.66	-2.08	2.17	0.00833	Soluble	-1.89	3.39	0.013	Very soluble	-3.98	0.0273	0.000105	Soluble	High	Yes	No	No	No	No	No	No	-7	0	0	0	0	0	0.55	0	0	0	2.24
DCM34120	COc1ccc(cc1N([C@H](c1ccccc1)C(=O)NC[C@@H]1CCCO1)[C@H](/C=N/C(=O)c1ccco1)O)C	C28H31N3O6	505.56	37	17	0.32	12	7	2	139.04	113.6	3.15	3.92	3.34	1.42	4.06	3.18	-4.99	0.00515	1.02e-05	Moderately soluble	-6	0.0005	9.9e-07	Poorly soluble	-6.9	6.36e-05	1.26e-07	Poorly soluble	High	No	Yes	No	Yes	Yes	Yes	Yes	-6.6	1	2	1	0	0	0.55	0	2	3	5.07
DCM34281	CCN(S(=O)(=O)N1CCC(CC1)C(=O)NCc1ccc(cc1)F)CC	C17H26FN3O3S	371.47	25	6	0.59	8	6	1	98.99	78.1	2.96	1.52	2.71	2.22	1.24	2.13	-2.75	0.66	0.00178	Soluble	-2.77	0.633	0.0017	Soluble	-4.37	0.016	4.31e-05	Moderately soluble	High	Yes	Yes	No	No	No	No	No	-7.49	0	0	0	0	0	0.55	0	0	2	2.7
DCM3444	Fc1ccc(cc1)CNC(=O)c1cc(O)nc2c1[C@@H](O)CC(C2)(C)C	C19H21FN2O3	344.38	25	12	0.37	4	5	3	91.65	82.45	2.27	2.47	2.81	2.33	3.42	2.66	-3.62	0.0821	0.000239	Soluble	-3.85	0.0491	0.000143	Soluble	-5.68	0.000715	2.07e-06	Moderately soluble	High	No	Yes	No	No	No	Yes	No	-6.65	0	0	0	0	0	0.55	0	0	0	3.35
DCM34448	COCCn1c(=S)[nH]c2c(c1=O)ccc(c2)C(=O)NC(C)C	C15H19N3O3S	321.39	22	10	0.4	6	3	2	87.96	108.21	2.69	1.16	1.84	0.73	3.51	1.99	-2.5	1.01	0.00313	Soluble	-3.03	0.302	0.000939	Soluble	-4.26	0.0177	5.5e-05	Moderately soluble	High	No	No	Yes	No	No	No	No	-7.44	0	0	0	0	0	0.55	0	1	0	2.65
DCM34525	C[C@H]1CCCC[C@@H]1NC(=O)c1cc(O)nc2c1cccc2	C17H20N2O2	284.35	21	10	0.41	3	3	2	83.49	62.22	2.48	3.69	3.25	2.61	2.79	2.96	-4.08	0.0235	8.28e-05	Moderately soluble	-4.69	0.00585	2.06e-05	Moderately soluble	-4.71	0.00548	1.93e-05	Moderately soluble	High	Yes	Yes	Yes	Yes	No	Yes	No	-5.41	0	0	0	0	0	0.55	0	0	1	2.77
DCM34526	Oc1nc2ccccc2c(c1)C(=O)NCc1ccccc1	C17H14N2O2	278.31	21	16	0.06	4	3	2	81.25	62.22	2.39	2.94	2.72	2.38	2.97	2.68	-3.72	0.0533	0.000192	Soluble	-3.91	0.0343	0.000123	Soluble	-6.05	0.00025	8.99e-07	Poorly soluble	High	Yes	No	Yes	No	No	Yes	Yes	-5.91	0	0	0	0	0	0.55	0	0	0	1.86
DCM34747	Cc1ccc(cc1)CNC(=O)[C@H]1CCC(=O)N1Cc1ccc(cc1)F	C20H21FN2O2	340.39	25	12	0.3	6	3	1	97.56	49.41	2.7	2.62	2.68	2.77	3.9	2.93	-3.56	0.0937	0.000275	Soluble	-3.31	0.168	0.000493	Soluble	-6.46	0.000118	3.46e-07	Poorly soluble	High	Yes	Yes	No	Yes	No	Yes	Yes	-6.52	0	0	0	0	0	0.55	0	0	0	2.61
DCM34984	Fc1ccc(cc1)CNC(=O)c1cc(C)nc2c1cccc2	C18H15FN2O	294.32	22	16	0.11	4	3	1	84.15	41.99	2.73	3.46	3.88	3.18	4.38	3.53	-4.12	0.0224	7.61e-05	Moderately soluble	-4.02	0.0279	9.47e-05	Moderately soluble	-7.28	1.54e-05	5.24e-08	Poorly soluble	High	Yes	No	Yes	Yes	No	Yes	Yes	-5.64	0	0	0	0	0	0.55	0	0	0	1.92
DCM35395	COCCn1c(=S)[nH]c2c(c1=O)ccc(c2)C(=O)NCc1ccc(cc1)F	C19H18FN3O3S	387.43	27	16	0.21	7	4	2	102.79	108.21	3.01	1.95	3.04	1.86	4.84	2.94	-3.45	0.138	0.000357	Soluble	-3.85	0.0551	0.000142	Soluble	-6.59	9.91e-05	2.56e-07	Poorly soluble	High	No	No	Yes	Yes	Yes	No	Yes	-7.28	0	0	0	0	0	0.55	0	1	1	2.83
DCM3542	CCOC(=O)c1ccc(cc1)NC(=O)c1cc(O)nc2c1cccc2	C19H16N2O4	336.34	25	16	0.11	6	5	2	94.07	88.52	2.61	3.22	3.18	2.49	2.94	2.89	-4.03	0.0313	9.3e-05	Moderately soluble	-4.75	0.00596	1.77e-05	Moderately soluble	-6.09	0.000271	8.05e-07	Poorly soluble	High	No	No	Yes	No	Yes	Yes	No	-6.07	0	0	0	0	0	0.55	0	0	0	2.27
DCM35470	OC(=O)[C@H]1CCCN1[C@H](/C(=N\C(=O)OC(C)(C)C)/Cc1ccccc1)O	C19H26N2O5	362.42	26	6	0.53	8	7	2	102.12	99.43	2.67	0.34	2.09	1.91	2.13	1.83	-1.94	4.12	0.0114	Very soluble	-1.99	3.69	0.0102	Very soluble	-2.81	0.563	0.00155	Soluble	High	No	Yes	No	No	No	No	No	-8.27	0	0	0	0	0	0.55	0	1	2	4.23
DCM35660	CC(NC(=O)[C@@H]1C[C@@]1(C)[C@H](c1ccccc1)NC(=O)OCc1ccccc1)C	C23H28N2O3	380.48	28	12	0.39	10	3	2	109.07	67.43	3.75	3.83	3.73	3.03	3.94	3.66	-4.27	0.0205	5.38e-05	Moderately soluble	-4.94	0.00435	1.14e-05	Moderately soluble	-6.84	5.44e-05	1.43e-07	Poorly soluble	High	Yes	Yes	No	Yes	Yes	Yes	Yes	-5.9	0	0	0	0	0	0.55	0	0	3	3.82
DCM3584	COCc1cc(O)n2c(n1)nc(n2)N	C7H9N5O2	195.18	14	9	0.29	2	5	2	48.07	98.56	1.08	-0.59	-0.59	-0.62	-0.95	-0.33	-1.02	18.5	0.095	Very soluble	-1.01	19.1	0.098	Very soluble	-0.94	22.2	0.114	Soluble	High	No	No	No	No	No	No	No	-7.91	0	1	0	0	1	0.55	0	0	1	2.55
DCM35942	COc1cccc(c1)C[C@H](C(=O)NC1CCN(CC1)C(=O)Nc1ccc(cc1)C)NC(=O)C	C25H32N4O4	452.55	33	12	0.4	11	4	3	131.05	99.77	3.47	2.65	2.29	1.91	2.67	2.6	-3.86	0.0627	0.000139	Soluble	-4.4	0.0182	4.02e-05	Moderately soluble	-6.64	0.000104	2.3e-07	Poorly soluble	High	No	Yes	No	No	No	Yes	Yes	-7.18	0	1	1	0	0	0.55	0	0	2	3.94
DCM35960	COc1ccc(c(c1)C[C@H](C(=O)NC1CCN(CC1)C(=O)c1cccc(c1)C)NC(=O)C)OC	C26H33N3O5	467.56	34	12	0.42	11	5	2	133.04	96.97	3.84	2.89	2.1	1.57	3.53	2.79	-4.09	0.0376	8.04e-05	Moderately soluble	-4.59	0.0121	2.59e-05	Moderately soluble	-6.7	9.37e-05	2e-07	Poorly soluble	High	No	Yes	No	No	No	Yes	Yes	-7.1	0	1	1	0	0	0.55	0	0	2	4.01
DCM362	CC[C@H](/C(=N/S(=O)(=O)c1ccc(cc1)C)/[C@H](N1CCC(CC1)C(=O)N[C@@H](C(=O)O)Cc1ccccc1)O)C	C28H37N3O6S	543.67	38	12	0.46	12	8	3	150.6	144.75	3.74	1.71	3.71	2.54	3.41	3.02	-3.73	0.101	0.000186	Soluble	-4.37	0.0234	4.31e-05	Moderately soluble	-6.11	0.000419	7.71e-07	Poorly soluble	Low	No	Yes	No	No	No	Yes	Yes	-8.4	1	3	2	1	0	0.55	0	1	2	5.34
DCM36268	CC([C@H](C(=O)NCCc1ccccc1)NC(=O)c1ccccc1F)C	C20H23FN2O2	342.41	25	12	0.3	9	3	2	95.73	58.2	3.25	3.97	3.36	3.43	4.11	3.62	-4.23	0.0204	5.95e-05	Moderately soluble	-4.89	0.00438	1.28e-05	Moderately soluble	-6.84	4.94e-05	1.44e-07	Poorly soluble	High	Yes	Yes	Yes	Yes	No	Yes	Yes	-5.57	0	0	0	0	0	0.55	0	0	2	2.77
DCM36446	CCN(CC(=O)NC1CCCC1)CC(=O)NCc1ccc(cc1)F	C18H26FN3O2	335.42	24	6	0.56	10	4	2	91.03	61.44	3.84	2.18	2.09	1.73	2.69	2.5	-2.82	0.51	0.00152	Soluble	-3.1	0.264	0.000788	Soluble	-5.15	0.00239	7.11e-06	Moderately soluble	High	Yes	Yes	No	No	No	Yes	No	-6.8	0	0	0	0	0	0.55	0	0	1	2.22
DCM36734	CCCCCn1c(=O)[nH]c2c(c1=O)ccc(c2)C(=O)NCCN1CCCC[C@H]1C	C22H32N4O3	400.51	29	10	0.59	9	4	2	120.66	87.2	3.46	3.01	2.1	2.37	3.7	2.93	-3.88	0.0527	0.000132	Soluble	-4.51	0.0125	3.12e-05	Moderately soluble	-5.94	0.000464	1.16e-06	Moderately soluble	High	No	Yes	No	No	No	Yes	Yes	-6.61	0	0	0	0	0	0.55	0	0	2	3.47
DCM37178	CSc1ccccc1NC(=O)CN([C@@H](c1cn(c(c1)O)[C@H](c1ccccc1)C)O)C	C23H27N3O3S	425.54	30	17	0.26	9	4	3	121.2	103.03	3.24	3.34	3.57	2.77	2.56	3.1	-4.41	0.0166	3.91e-05	Moderately soluble	-5.18	0.00281	6.6e-06	Moderately soluble	-5.68	0.000897	2.11e-06	Moderately soluble	High	No	Yes	No	Yes	Yes	Yes	Yes	-6.52	0	0	0	0	0	0.55	0	1	2	3.86
DCM37228	N#Cc1ccccc1S(=O)(=O)N1CCN(CC1)[C@H](/C(=N\C(=O)c1ccco1)/Cc1ccccc1)O	C25H24N4O5S	492.55	35	17	0.24	8	9	1	135.92	135.59	2.72	2.51	2.62	0.81	2.35	2.2	-4.31	0.0243	4.94e-05	Moderately soluble	-5	0.00489	9.93e-06	Moderately soluble	-6.19	0.000319	6.47e-07	Poorly soluble	High	No	No	No	No	Yes	No	Yes	-7.52	0	2	0	1	0	0.55	0	1	2	4.46
DCM37241	Fc1cccc(c1)S(=O)(=O)N1CCN(CC1)[C@H](/C(=N\C(=O)c1ccco1)/Cc1ccccc1)O	C24H24FN3O5S	485.53	34	17	0.25	8	9	1	131.16	111.8	3.68	2.89	3.31	1.83	2.73	2.89	-4.51	0.0149	3.07e-05	Moderately soluble	-4.9	0.00614	1.26e-05	Moderately soluble	-6.39	0.000198	4.08e-07	Poorly soluble	High	No	No	No	Yes	Yes	Yes	Yes	-7.21	0	2	0	0	0	0.55	0	1	2	4.36
DCM37293	C[C@H](C(=O)N[C@@H](c1ccccc1)C(=O)O)NC(=O)C1(CCN(CC1)C(=O)OC(C)(C)C)c1ccccc1	C28H35N3O6	509.59	37	12	0.43	12	6	3	142.07	125.04	3.08	3.4	2.7	1.94	2.98	2.82	-4.59	0.0131	2.57e-05	Moderately soluble	-5.71	0.001	1.97e-06	Moderately soluble	-6.2	0.000325	6.37e-07	Poorly soluble	High	No	Yes	No	No	No	No	Yes	-6.99	1	3	1	0	0	0.56	0	0	2	4.27
DCM37492	O=C([C@@H](Cc1ccccc1)NC(=O)C1CCN(CC1)[C@H](C(=N)C(C)C)O)NCc1ccc(cc1)F	C27H35FN4O3	482.59	35	12	0.44	12	6	4	138.6	105.52	3.47	3.3	2.76	2.13	4.07	3.15	-4.37	0.0205	4.24e-05	Moderately soluble	-5.19	0.0031	6.43e-06	Moderately soluble	-6.78	8.06e-05	1.67e-07	Poorly soluble	High	No	Yes	No	No	No	Yes	Yes	-6.9	0	2	1	0	0	0.55	0	1	2	4.34
DCM37950	O[C@@H](/C=N/C(=O)c1ccccc1F)OCC(=O)N([C@@H]1C(=O)NC(=O)N(C1=N)Cc1ccccc1)CC(C)C	C26H28FN5O6	525.53	38	12	0.31	12	9	3	143.59	152.46	2.86	2.24	1.46	1.72	2.75	2.21	-3.95	0.0588	0.000112	Soluble	-5.08	0.0044	8.37e-06	Moderately soluble	-5.64	0.0012	2.28e-06	Moderately soluble	Low	No	Yes	No	No	No	No	Yes	-7.92	2	2	2	1	1	0.17	0	2	2	4.88
DCM38209	O=C(NCc1ccc(cc1)F)CCC1CCN(CC1)C(=O)c1ccccc1Cl	C22H24ClFN2O2	402.89	28	12	0.36	8	3	1	112.25	49.41	2.98	3.95	4.32	3.96	4.9	4.02	-4.62	0.00976	2.42e-05	Moderately soluble	-4.69	0.00827	2.05e-05	Moderately soluble	-7.39	1.66e-05	4.11e-08	Poorly soluble	High	Yes	Yes	No	Yes	Yes	Yes	Yes	-5.95	0	0	0	0	0	0.55	0	0	3	2.85
DCM38243	O[C@H](/C(=N/C(=O)c1ccccc1)/Cc1ccccc1)N1CCCCCC1	C22H26N2O2	350.45	26	12	0.36	6	4	1	109.12	52.9	3.47	3.98	3.32	3.51	4.28	3.71	-4.47	0.012	3.42e-05	Moderately soluble	-4.79	0.00566	1.61e-05	Moderately soluble	-5.8	0.000558	1.59e-06	Moderately soluble	High	Yes	No	No	No	Yes	Yes	No	-5.61	0	0	0	0	0	0.55	0	1	2	3.81
DCM38500	OC[C@@H]([C@H]([C@H]1C[C@@H]1C(=O)NC1CCCCC1)O)NC(=O)[C@H](Cc1ccccc1)NC(=O)OC(C)(C)C	C27H41N3O6	503.63	36	6	0.67	15	6	5	136.16	136.99	3.83	2.51	2.05	1.24	2.69	2.46	-3.68	0.106	0.00021	Soluble	-5.03	0.00467	9.28e-06	Moderately soluble	-4.78	0.00842	1.67e-05	Moderately soluble	High	No	Yes	No	No	No	No	No	-7.59	1	3	1	1	0	0.55	0	0	2	5.08
DCM38746	OC/C(=N\C(=O)/C=C/1\CCCCCCC(=O)OC[C@@H]2N([C@@H]1O)CCC2)/Cc1ccccc1	C25H34N2O5	442.55	32	6	0.56	5	7	2	127.54	99.43	3.17	2.71	2.41	2.32	3.4	2.8	-4.1	0.0352	7.95e-05	Moderately soluble	-4.45	0.0157	3.54e-05	Moderately soluble	-4.41	0.0173	3.91e-05	Moderately soluble	High	No	Yes	No	No	No	No	No	-7.08	0	0	0	0	0	0.55	0	2	1	5.43
DCM38753	COc1ccc(cc1)NC(=O)Nc1cccc2c1O[C@@H](CN(C(=O)Nc1ccccc1)C)[C@H](C)CN(C2=O)[C@@H](CO)C	C31H37N5O6	575.66	42	18	0.32	12	6	4	164.97	132.47	3.46	3.15	3.77	2.45	1.85	2.94	-4.92	0.00694	1.21e-05	Moderately soluble	-5.6	0.00144	2.5e-06	Moderately soluble	-7.74	1.05e-05	1.83e-08	Poorly soluble	Low	No	Yes	No	No	No	Yes	Yes	-7.57	2	3	1	1	0	0.17	0	0	2	5.15
DCM38761	OC[C@H](N1C[C@@H](C)[C@H](CN(C(=O)Nc2ccc3c(c2)OCO3)C)Oc2c(C1=O)cc(cc2)NC(=O)C1CCCCC1)C	C31H40N4O7	580.67	42	12	0.52	10	7	3	162.05	129.67	3.96	3.69	3.56	2	2.48	3.14	-5.32	0.0028	4.83e-06	Moderately soluble	-6.1	0.000458	7.88e-07	Poorly soluble	-6.22	0.000347	5.98e-07	Poorly soluble	High	No	Yes	No	No	No	No	Yes	-7.22	2	3	0	0	0	0.17	0	0	3	5.38
DCM38766	CCOC(=O)CCCCCC(=O)Nc1ccc2c(c1)CC(=O)N(C[C@H]([C@H](O2)CN(Cc1ccccc1)C)C)[C@@H](CO)C	C33H47N3O6	581.74	42	12	0.55	16	7	2	168.66	108.41	4.39	3.76	3.7	2.29	4.93	3.81	-4.97	0.00622	1.07e-05	Moderately soluble	-5.73	0.00108	1.86e-06	Moderately soluble	-8.22	3.51e-06	6.03e-09	Poorly soluble	High	No	Yes	No	No	No	Yes	Yes	-7.18	1	3	1	0	1	0.55	0	0	3	5.74
DCM38769	OC[C@H](N1C[C@H](C)[C@@H](CN(C(=O)NC(C)C)C)Oc2c(C1=O)cccc2NC(=O)Nc1ccccc1)C	C27H37N5O5	511.61	37	12	0.44	11	5	4	146.87	123.24	3.29	2.42	2.84	2.12	1.35	2.4	-4.05	0.0455	8.9e-05	Moderately soluble	-4.65	0.0114	2.24e-05	Moderately soluble	-5.99	0.00052	1.02e-06	Moderately soluble	High	No	Yes	No	No	No	No	Yes	-7.7	1	3	1	0	0	0.55	0	0	2	4.94
DCM38771	COc1ccc(cc1)NC(=O)N(C[C@H]1Oc2c(cccc2C(=O)N(C[C@H]1C)[C@H](CO)C)NC(=O)Nc1ccccc1)C	C31H37N5O6	575.66	42	18	0.32	12	6	4	164.97	132.47	3.56	3.15	3.77	2.45	1.85	2.96	-4.92	0.00694	1.21e-05	Moderately soluble	-5.6	0.00144	2.5e-06	Moderately soluble	-7.74	1.05e-05	1.83e-08	Poorly soluble	Low	No	Yes	No	No	No	Yes	Yes	-7.57	2	3	1	1	0	0.17	0	0	2	5.15
DCM38881	OC[C@H](N1C[C@@H](C)[C@H](OCCCC[C@@H](Oc2c(C1=O)cc(cc2)NC(=O)CCC(F)(F)F)C)CN(Cc1ccc(c(c1)Cl)Cl)C)C	C33H44Cl2F3N3O5	690.62	46	12	0.58	11	9	2	178.89	91.34	4.48	6.46	7.74	3.76	6.33	5.75	-7.66	1.52e-05	2.19e-08	Poorly soluble	-8.17	4.64e-06	6.72e-09	Poorly soluble	-9.51	2.16e-07	3.13e-10	Poorly soluble	Low	No	Yes	No	No	No	No	Yes	-5.93	1	4	1	1	2	0.55	0	0	3	6.12
DCM38891	O=C(Nc1ccc(cc1)C(=O)N(CCc1ccccc1)C)Cc1ccc(cc1)NC(=O)[C@@H]1CCCN(C1)C(=O)C1CC1	C34H38N4O4	566.69	42	18	0.35	14	4	2	167.98	98.82	4.3	3.7	3.94	3.23	4.73	3.98	-5.08	0.00474	8.36e-06	Moderately soluble	-5.47	0.00194	3.42e-06	Moderately soluble	-9.1	4.48e-07	7.91e-10	Poorly soluble	High	No	Yes	No	Yes	Yes	Yes	Yes	-7.13	1	3	1	0	0	0.55	0	0	3	4.07
DCM38897	O=C(Nc1ccc(cc1)C(=O)N(C1CCCC1)C)Cc1ccc(cc1)NC(=O)[C@H]1CCCN(C1)C(=O)CCc1ccccc1	C36H42N4O4	594.74	44	18	0.39	14	4	2	177.6	98.82	4.53	4.44	4.93	3.59	5.2	4.54	-5.7	0.00118	1.98e-06	Moderately soluble	-6.23	0.000347	5.84e-07	Poorly soluble	-9.62	1.42e-07	2.38e-10	Poorly soluble	High	No	Yes	No	Yes	Yes	Yes	Yes	-6.78	1	3	1	0	0	0.55	0	0	3	4.34
DCM38971	O=C(Cc1cc([C@H](N(C)C)O)c(n(c1=O)Cc1ccccc1)C)NCCCCc1ccccc1	C28H35N3O3	461.6	34	18	0.36	12	4	2	136.54	74.57	3.37	2.98	3.11	3.29	4.95	3.54	-4.18	0.0306	6.62e-05	Moderately soluble	-4.21	0.0285	6.17e-05	Moderately soluble	-8.4	1.82e-06	3.94e-09	Poorly soluble	High	Yes	Yes	No	No	No	Yes	Yes	-7	0	1	1	0	0	0.55	0	1	2	4.19
DCM38972	O=C(Cc1cc([C@@H](N(C)C)O)c(n(c1=O)Cc1ccccc1)C)NCCN1CCOCC1	C24H34N4O4	442.55	32	12	0.5	10	6	2	127.45	87.04	3.34	-0.02	0.04	1.11	2.46	1.39	-2.19	2.87	0.00648	Soluble	-1.36	19.4	0.0438	Very soluble	-5.28	0.0023	5.2e-06	Moderately soluble	High	No	Yes	No	No	No	No	No	-9.01	0	0	0	0	0	0.55	0	1	2	4.12
DCM39023	CCOC(=O)CCCCCC(=O)Nc1ccc2c(c1)C(=O)N(C[C@@H](C)[C@@H](OCCCC[C@@H](O2)C)CN(C(=O)C1CCCCC1)C)[C@H](CO)C	C38H61N3O8	687.91	49	6	0.74	16	8	2	196.44	134.71	5.34	5.23	5.4	2.48	5.3	4.75	-6.43	0.000253	3.68e-07	Poorly soluble	-7.81	1.07e-05	1.56e-08	Poorly soluble	-7.55	1.94e-05	2.82e-08	Poorly soluble	Low	No	Yes	No	No	No	No	Yes	-6.78	2	3	1	1	3	0.17	0	0	3	6.88
DCM39026	OC[C@@H](N1C[C@H](C)[C@@H](OCCCC[C@H](Oc2c(C1=O)cc(cc2)NC(=O)Nc1c(C)noc1C)C)CN(C(=O)Nc1cccc2c1cccc2)C)C	C39H50N6O7	714.85	52	21	0.44	11	8	4	205.9	158.5	4.03	5.04	6.09	2.8	3.58	4.31	-7.02	6.82e-05	9.55e-08	Poorly soluble	-8.11	5.55e-06	7.77e-09	Poorly soluble	-10	7.2e-08	1.01e-10	Poorly soluble	Low	No	Yes	No	No	No	No	Yes	-7.08	2	4	2	2	3	0.17	0	0	3	7.07
DCM39027	CCOC(=O)CCCCCC(=O)Nc1ccc2c(c1)C(=O)N(C[C@H](C)[C@@H](OCCCC[C@@H](O2)C)CN(C(=O)Nc1ccc(cc1)F)C)[C@H](CO)C	C38H55FN4O8	714.86	51	12	0.58	17	9	3	198.89	146.74	4.99	4.63	5.9	2.93	4.87	4.66	-6.24	0.00041	5.74e-07	Poorly soluble	-7.44	2.61e-05	3.65e-08	Poorly soluble	-8.92	8.57e-07	1.2e-09	Poorly soluble	Low	No	Yes	No	No	No	No	Yes	-7.37	2	4	2	2	2	0.17	0	0	3	6.82
DCM39038	O=C(Cc1cc([C@@H](N(C(C)C)C(C)C)O)c(n(c1=O)Cc1ccccc1)C)NCCN1CCOCC1	C28H42N4O4	498.66	36	12	0.57	12	6	2	146.68	87.04	4.5	1.58	1.6	1.92	3.76	2.67	-3.38	0.207	0.000415	Soluble	-3.02	0.478	0.000958	Soluble	-6.1	0.0004	8.02e-07	Poorly soluble	High	No	Yes	No	No	No	Yes	No	-8.22	0	3	1	0	0	0.55	0	1	2	4.6
DCM39429	O=C(Cc1cc([C@H](N(C)C)O)c(n(c1=O)Cc1ccc(cc1)F)C)NCc1cccc2c1cccc2	C29H30FN3O3	487.57	36	22	0.24	9	5	2	139.59	74.57	4.26	3.16	3.85	3.67	5.21	4.03	-4.71	0.00946	1.94e-05	Moderately soluble	-4.4	0.0196	4.02e-05	Moderately soluble	-9.12	3.72e-07	7.62e-10	Poorly soluble	High	Yes	Yes	No	No	Yes	Yes	Yes	-7.03	0	2	0	0	0	0.55	0	1	2	4.12
DCM39443	O=C(Cc1cc([C@@H](N(C(C)C)C(C)C)O)c(n(c1=O)CCCN1CCCC1=O)C)NC(c1ccccc1)c1ccccc1	C35H46N4O4	586.76	43	18	0.46	14	5	2	175.09	94.88	4.9	3.53	3.7	3.35	5.61	4.22	-5.09	0.0048	8.17e-06	Moderately soluble	-5.21	0.00365	6.21e-06	Moderately soluble	-8.7	1.17e-06	1.99e-09	Poorly soluble	High	No	Yes	No	No	No	Yes	Yes	-7.37	1	3	1	0	0	0.55	0	1	3	5.37
DCM39517	OCC[C@H]1N(Cc2c1c(nc(c2)C(=O)NCc1ccccc1)c1cccc(c1)c1cccc(c1)C(=O)N(C)C)[S@@](=O)C(C)(C)C	C36H40N4O4S	624.79	45	24	0.31	12	6	2	183.44	122.05	4.7	4.39	5.61	3.18	4.97	4.57	-6.08	0.000517	8.28e-07	Poorly soluble	-6.67	0.000134	2.14e-07	Poorly soluble	-10.82	9.37e-09	1.5e-11	Insoluble	Low	No	Yes	No	Yes	No	Yes	Yes	-6.99	1	4	1	0	1	0.55	0	0	3	5.45
DCM40112	CC(=O)N[C@H](C(=O)NC1CCN(CC1)C(=O)NC1CCCCC1)Cc1ccccc1	C23H34N4O3	414.54	30	6	0.61	10	3	3	120.3	90.54	3.43	2.57	1.98	1.98	2.15	2.42	-3.52	0.126	0.000304	Soluble	-4.12	0.0315	7.6e-05	Moderately soluble	-5.08	0.00346	8.34e-06	Moderately soluble	High	No	Yes	No	No	No	Yes	No	-7	0	0	0	0	0	0.55	0	0	2	3.55
DCM405	OC(=O)[C@H](NC(=O)c1cc(oc1C)C(C)(C)C)Cc1ccccc1	C19H23NO4	329.39	24	11	0.37	7	4	2	91.81	79.54	2.82	3.96	3.31	2.05	3.72	3.17	-4.25	0.0183	5.57e-05	Moderately soluble	-5.33	0.00154	4.67e-06	Moderately soluble	-5.53	0.000979	2.97e-06	Moderately soluble	High	No	No	No	Yes	Yes	No	No	-5.5	0	0	0	0	0	0.56	0	0	1	3.58
DCM408	COc1cc(cc(c1OC)OC)C(=O)N1CCC(CC1)NC(=O)[C@@H](Cc1ccc(cc1)C)NC(=O)C	C27H35N3O6	497.58	36	12	0.44	12	6	2	139.53	106.2	3.68	2.87	2.11	1.27	3.63	2.71	-4.19	0.0323	6.49e-05	Moderately soluble	-4.76	0.00865	1.74e-05	Moderately soluble	-6.79	8.01e-05	1.61e-07	Poorly soluble	High	No	Yes	No	No	No	Yes	Yes	-7.3	0	3	1	0	0	0.55	0	0	2	4.11
DCM42000	O=C(CN1C(=O)NC2(C1=O)CCCC2)Nc1cccc(c1)C(F)(F)F	C16H16F3N3O3	355.31	25	6	0.44	5	6	2	89.53	78.51	2.43	1.98	2.71	1.68	2.17	2.19	-3.14	0.259	0.000728	Soluble	-3.25	0.198	0.000556	Soluble	-4.74	0.00648	1.82e-05	Moderately soluble	High	Yes	Yes	No	No	No	No	No	-7.06	0	0	0	0	0	0.55	0	1	1	2.85
DCM42804	CCOC(=O)N1CCC(CC1)NC(=O)[C@H](NC(=O)c1ccco1)Cc1ccccc1	C22H27N3O5	413.47	30	11	0.41	11	5	2	113.63	100.88	3.54	2.76	1.98	1.05	2.15	2.3	-3.69	0.0849	0.000205	Soluble	-4.53	0.0121	2.93e-05	Moderately soluble	-5.47	0.00141	3.41e-06	Moderately soluble	High	No	Yes	No	Yes	Yes	Yes	Yes	-6.86	0	0	1	0	0	0.55	0	0	2	3.69
DCM43415	CCOC(=O)N1CCC(CC1)NC(=O)[C@@H](Cc1ccccc1)NC(=O)C1CCCCC1	C24H35N3O4	429.55	31	6	0.62	11	4	2	123.39	87.74	3.69	3.78	2.65	2.19	2.88	3.04	-4.3	0.0214	4.99e-05	Moderately soluble	-5.32	0.00207	4.83e-06	Moderately soluble	-5.16	0.00299	6.95e-06	Moderately soluble	High	No	Yes	No	Yes	No	Yes	Yes	-6.24	0	0	1	0	0	0.55	0	0	3	3.77
DCM43587	CCOCCCn1c(=S)[nH]c2c(c1=O)ccc(c2)C(=O)NCC(OC)OC	C18H25N3O5S	395.47	27	10	0.5	11	5	2	104.55	126.67	3.02	0.95	1.83	0.28	3.82	1.98	-2.44	1.44	0.00364	Soluble	-3.2	0.251	0.000635	Soluble	-4.9	0.00494	1.25e-05	Moderately soluble	High	No	Yes	No	No	No	No	No	-8.04	0	0	1	0	0	0.55	0	2	2	3.06
DCM43592	O=C(N1CCC[C@H]1C(=O)N[C@@H](c1ccccc1)C(=O)O)OCc1ccccc1	C21H22N2O5	382.41	28	12	0.29	9	5	2	105.5	95.94	2.72	2.78	1.87	1.72	1.9	2.2	-3.69	0.0789	0.000206	Soluble	-4.45	0.0135	3.54e-05	Moderately soluble	-4.58	0.01	2.62e-05	Moderately soluble	High	No	Yes	No	No	Yes	No	No	-6.66	0	0	0	0	0	0.56	0	0	2	3.52
DCM44292	O=C(Nc1ccc(cc1F)F)CN1C(=O)N[C@](C1=O)(C)C1CC1	C15H15F2N3O3	323.29	23	6	0.4	5	5	2	84.45	78.51	2.42	1.21	1.45	1.99	2.05	1.82	-2.47	1.1	0.00339	Soluble	-2.46	1.13	0.0035	Soluble	-4.31	0.0158	4.9e-05	Moderately soluble	High	No	Yes	No	No	No	No	No	-7.41	0	0	0	0	0	0.55	0	1	0	2.78
DCM45225	Fc1ccc(cc1)C(=O)NCc1cc2c(n1C)cccc2	C17H15FN2O	282.31	21	15	0.12	4	2	1	80.64	34.03	2.86	2.91	3.52	2.99	3.4	3.14	-3.69	0.0579	0.000205	Soluble	-3.29	0.146	0.000518	Soluble	-6.04	0.000256	9.06e-07	Poorly soluble	High	Yes	No	Yes	Yes	No	Yes	Yes	-5.96	0	0	0	0	0	0.55	0	0	0	1.97
DCM45266	CCCCCCCCCC(=O)N[C@@H]([C@H](c1ccccc1)O)CN1CCOCC1	C23H38N2O3	390.56	28	6	0.7	14	4	2	118.27	61.8	3.68	4.19	2.97	2.14	4.67	3.53	-4.14	0.0286	7.32e-05	Moderately soluble	-5.2	0.00248	6.35e-06	Moderately soluble	-6.07	0.000335	8.59e-07	Poorly soluble	High	Yes	No	No	No	No	Yes	No	-5.71	0	0	1	0	0	0.55	0	0	3	3.8
DCM45302	O[C@H](/C(=N\C(=O)OC(C)(C)C)/Cc1ccccc1)N1CCC(CC1)C(=O)O	C20H28N2O5	376.45	27	6	0.55	8	7	2	106.93	99.43	3.32	0.25	2.34	2.14	2.39	2.09	-1.97	4.05	0.0108	Very soluble	-1.9	4.75	0.0126	Very soluble	-3.08	0.315	0.000838	Soluble	High	No	Yes	No	No	No	No	No	-8.42	0	0	0	0	0	0.55	0	1	2	4.32
DCM45501	O=C([C@@H](NC(=O)[C@@H]1Cc2ccccc2CN1C(=O)OC(C)(C)C)C)NC1CCCC1	C23H33N3O4	415.53	30	6	0.61	9	4	2	118.78	87.74	3.93	3.04	2.38	1.98	2.5	2.77	-3.89	0.0541	0.00013	Soluble	-4.55	0.0118	2.83e-05	Moderately soluble	-4.74	0.00765	1.84e-05	Moderately soluble	High	No	Yes	No	No	No	Yes	Yes	-6.68	0	0	0	0	0	0.55	0	0	2	4.05
DCM46479	O[C@@H](/C(=N\C(=O)c1ccco1)/Cc1ccccc1)N1CCN(CC1)S(=O)(=O)c1ccccc1F	C24H24FN3O5S	485.53	34	17	0.25	8	9	1	131.16	111.8	3.47	2.89	3.31	1.83	2.73	2.85	-4.51	0.0149	3.07e-05	Moderately soluble	-4.9	0.00614	1.26e-05	Moderately soluble	-6.39	0.000198	4.08e-07	Poorly soluble	High	No	No	No	Yes	Yes	Yes	Yes	-7.21	0	2	0	0	0	0.55	0	1	2	4.39
DCM46495	COc1ccc(cc1)S(=O)(=O)N1CCN(CC1)[C@H](/C(=N\C(=O)c1ccco1)/Cc1ccccc1)O	C25H27N3O6S	497.56	35	17	0.28	9	9	1	137.69	121.03	3.77	2.77	2.76	1.15	2.38	2.56	-4.44	0.0183	3.67e-05	Moderately soluble	-4.97	0.00537	1.08e-05	Moderately soluble	-6.22	0.000297	5.97e-07	Poorly soluble	High	No	No	No	No	Yes	Yes	Yes	-7.37	0	2	0	0	0	0.55	0	1	2	4.46
DCM46541	O=C([C@@H](Cc1ccccc1)NC(=O)C1CCN(CC1)[C@H](C(=N)C)O)Nc1ccc(cc1)F	C24H29FN4O3	440.51	32	12	0.38	10	6	4	125.72	105.52	2.83	2.32	2.41	1.79	3.02	2.47	-3.65	0.0986	0.000224	Soluble	-4.17	0.0295	6.69e-05	Moderately soluble	-5.98	0.000461	1.05e-06	Moderately soluble	High	No	Yes	No	No	No	Yes	Yes	-7.34	0	0	0	0	0	0.55	0	1	2	3.99
DCM46702	O[C@H](/C(=N\C(=O)OC(C)(C)C)/Cc1ccccc1)N1CCC(CC1)C(=O)N[C@@H](C(=O)O)C	C23H33N3O6	447.52	32	6	0.57	11	8	3	124.35	128.53	3.32	-0.01	1.84	1.55	2.25	1.79	-2.02	4.26	0.00953	Soluble	-2.24	2.58	0.00576	Soluble	-3.45	0.159	0.000355	Soluble	High	No	Yes	No	No	No	No	No	-9.04	0	0	1	0	0	0.55	0	1	2	4.86
DCM47120	O=C(N(Cc1ccccc1)C)COC(=O)c1ccccc1SCC(=O)N1CCCC1	C23H26N2O4S	426.53	30	12	0.35	11	4	0	120.38	92.22	3.49	3.32	2.68	2.68	3.55	3.14	-4.15	0.0305	7.14e-05	Moderately soluble	-4.93	0.00498	1.17e-05	Moderately soluble	-5.89	0.000546	1.28e-06	Moderately soluble	High	No	No	No	Yes	Yes	Yes	Yes	-6.54	0	0	1	0	0	0.55	0	0	2	3.16
DCM47255	O=C[C@H]([C@@H](OC)O)NC(=O)[C@H]1CCCN1[C@H](/C=N/C(=O)OCc1ccccc1)O	C19H25N3O7	407.42	29	6	0.47	12	9	3	105.76	137.76	2.35	-0.03	-0.71	-0.51	0.79	0.38	-1.71	7.98	0.0196	Very soluble	-2.41	1.57	0.00386	Soluble	-1.79	6.64	0.0163	Soluble	Low	No	Yes	No	No	No	No	No	-8.81	0	1	1	1	0	0.55	0	3	2	4.61
DCM47320	CCc1csc(n1)CNC(=O)[C@H]1CCC(=O)N(C1)Cc1cccc(c1)F	C19H22FN3O2S	375.46	26	11	0.42	7	4	1	102.85	90.54	2.92	2.06	2.64	1.75	4.6	2.79	-3.32	0.181	0.000482	Soluble	-3.59	0.0965	0.000257	Soluble	-6.02	0.000361	9.62e-07	Poorly soluble	High	No	Yes	No	Yes	Yes	Yes	Yes	-7.13	0	0	0	0	0	0.55	0	0	1	3.47
DCM47520	O=C([C@H]1CCC(=O)N(C1)C1CC1)NCc1cccc(c1)F	C16H19FN2O2	290.33	21	6	0.5	5	3	1	80.41	49.41	2.47	1.22	1.67	2.08	2.62	2.01	-2.29	1.49	0.00513	Soluble	-1.85	4.06	0.014	Very soluble	-4.06	0.0255	8.77e-05	Moderately soluble	High	Yes	Yes	No	No	No	No	No	-7.2	0	0	0	0	0	0.55	0	0	0	2.43
DCM47990	OC/C(=N\C(=O)/C=C/1\CCCC/C(=C/C(=O)OC(C)(C)C)/[C@H](O[C@H](CN[C@@H]1O)c1ccccc1)O)/Cc1ccccc1	C33H42N2O7	578.7	42	12	0.42	9	9	4	165.47	137.68	4.99	2.81	3.24	2.42	4.63	3.62	-4.82	0.00885	1.53e-05	Moderately soluble	-5.36	0.00254	4.38e-06	Moderately soluble	-6.61	0.000142	2.45e-07	Poorly soluble	Low	No	Yes	No	No	No	No	No	-7.83	1	3	0	1	0	0.55	0	2	2	6.3
DCM47995	OC/C(=N\C(=O)/C=C/1\CCCC/C(=N/C(=O)OCC2c3ccccc3c3c2cccc3)/[C@H](OC[C@H]2N([C@H]1O)CCC2)O)/Cc1ccccc1	C39H43N3O7	665.77	49	18	0.38	9	10	3	191.44	141.25	4.31	4.46	4.82	3.32	5.51	4.48	-6.46	0.000233	3.5e-07	Poorly soluble	-7.15	4.76e-05	7.15e-08	Poorly soluble	-8.36	2.9e-06	4.36e-09	Poorly soluble	Low	No	Yes	No	No	No	No	No	-7.19	1	3	1	1	1	0.55	0	2	3	7.22
DCM47997	OC/C(=N\C(=O)/C=C\1/CCCC/C(=N/C(=O)OCC2c3ccccc3c3c2cccc3)/[C@H](OCCN[C@@H]1O)O)/Cc1ccccc1	C36H39N3O7	625.71	46	18	0.33	9	10	4	179.04	150.04	4.4	3.44	3.94	2.79	5.37	3.99	-5.58	0.00164	2.62e-06	Moderately soluble	-6.27	0.000335	5.35e-07	Poorly soluble	-8.53	1.83e-06	2.92e-09	Poorly soluble	Low	No	Yes	No	No	No	No	No	-7.67	1	3	1	1	2	0.55	0	2	2	6.65
DCM48023	OC[C@@H](N1C[C@H](C)[C@@H](CN(C(=O)Nc2ccc(cc2)OC)C)Oc2c(C1=O)cc(cc2)NC(=O)Cn1cnnn1)C	C27H34N8O6	566.61	41	17	0.41	12	9	3	152.72	164.04	2.15	1.24	0.94	1.23	-0.22	1.07	-3.65	0.127	0.000224	Soluble	-4.28	0.0295	5.21e-05	Moderately soluble	-5.37	0.00242	4.28e-06	Moderately soluble	Low	No	Yes	No	No	No	No	Yes	-8.88	2	3	2	1	1	0.17	0	0	2	4.99
DCM48025	OC[C@@H](N1C[C@H](C)[C@@H](CN(C(=O)Nc2ccc(cc2)OC)C)Oc2c(C1=O)cc(cc2)NC(=O)CCN1CCOCC1)C	C31H43N5O7	597.7	43	12	0.52	13	8	3	170.38	132.91	3.83	1.37	1.6	0.84	1.78	1.88	-3.76	0.105	0.000175	Soluble	-3.76	0.103	0.000172	Soluble	-6.13	0.000439	7.35e-07	Poorly soluble	High	No	Yes	No	No	No	No	Yes	-8.97	2	3	1	1	0	0.17	0	0	2	5.32
DCM48026	OC[C@@H](N1C[C@@H](C)[C@@H](CN(C(=O)NC2CCCCC2)C)Oc2c(C1=O)cc(cc2)NC(=O)Cc1ccccc1)C	C31H42N4O5	550.69	40	12	0.52	11	5	3	159.26	111.21	3.67	3.64	3.49	2.59	3.04	3.29	-5.04	0.00498	9.05e-06	Moderately soluble	-5.66	0.00119	2.17e-06	Moderately soluble	-6.91	6.73e-05	1.22e-07	Poorly soluble	High	No	Yes	No	No	No	Yes	Yes	-7.07	1	3	1	0	0	0.55	0	0	3	5.07
DCM48028	OC[C@@H](N1C[C@@H](C)[C@H](CN(C(=O)Nc2cccc3c2cccc3)C)Oc2c(CC1=O)cc(cc2)NC(=O)Cc1ccccc1)C	C36H40N4O5	608.73	45	22	0.31	11	5	3	180.65	111.21	3.62	4.58	4.57	3.11	4.22	4.02	-6.14	0.000446	7.32e-07	Poorly soluble	-6.64	0.00014	2.29e-07	Poorly soluble	-9.87	8.17e-08	1.34e-10	Poorly soluble	High	No	Yes	Yes	Yes	Yes	Yes	Yes	-6.76	1	3	1	0	1	0.55	0	0	3	5.71
DCM48059	COc1cc(CNC(=O)/C=C/2\C[C@@H](C(=O)N3CCN(CC3)C(=O)c3ccco3)[C@]3(N([C@H]2O)CCc2c3[nH]c3c2cccc3)CC)ccc1OC	C38H43N5O7	681.78	50	20	0.39	11	8	3	197.65	140.58	4	2.61	2.4	1.04	4	2.81	-5.28	0.00357	5.23e-06	Moderately soluble	-5.21	0.00419	6.14e-06	Moderately soluble	-8.5	2.14e-06	3.13e-09	Poorly soluble	Low	No	Yes	No	No	Yes	Yes	Yes	-8.61	2	3	2	1	1	0.17	0	1	2	6.05
DCM48135	O=C(Nc1ccc(cc1)C(=O)N(CCc1ccccc1)C)Cc1ccc(cc1)NC(=O)[C@@H]1CCCN(C1)C(=O)C1CCCC1	C36H42N4O4	594.74	44	18	0.39	14	4	2	177.6	98.82	4.47	4.78	4.79	3.59	5.2	4.57	-5.92	0.000719	1.21e-06	Moderately soluble	-6.59	0.000154	2.59e-07	Poorly soluble	-9.62	1.42e-07	2.38e-10	Poorly soluble	High	No	Yes	No	Yes	Yes	Yes	Yes	-6.53	1	3	1	0	0	0.55	0	0	3	4.35
DCM48214	O=C(Cc1cc([C@H](N(C)C)O)c(n(c1=O)Cc1ccccc1)C)NCC1CCCCC1	C25H35N3O3	425.56	31	12	0.52	9	4	2	124.36	74.57	2.54	2.68	2.67	2.9	3.82	2.92	-3.86	0.0588	0.000138	Soluble	-3.9	0.0538	0.000126	Soluble	-6.15	0.000304	7.14e-07	Poorly soluble	High	Yes	Yes	No	No	No	Yes	Yes	-6.99	0	0	0	0	0	0.55	0	1	2	4.1
DCM48217	CCCCn1c(C)c(cc(c1=O)CC(=O)NCCCCc1ccccc1)[C@H](N(C)C)O	C25H37N3O3	427.58	31	12	0.52	13	4	2	126.48	74.57	4.13	2.74	2.87	2.9	4.65	3.46	-3.65	0.0967	0.000226	Soluble	-3.96	0.0468	0.00011	Soluble	-7.12	3.26e-05	7.62e-08	Poorly soluble	High	Yes	Yes	No	No	No	Yes	Yes	-6.96	0	0	1	0	0	0.55	0	1	2	4.12
DCM48261	OC[C@@H](N1C[C@H](C)[C@@H](OCCCC[C@H](Oc2c(C1=O)cc(cc2)NC(=O)Cc1ccccc1)C)CN(S(=O)(=O)c1ccccc1)C)C	C36H47N3O7S	665.84	47	18	0.44	10	8	2	186.87	133.86	3.8	4.71	5.49	2.31	3.52	3.97	-6.56	0.000184	2.76e-07	Poorly soluble	-7.25	3.75e-05	5.63e-08	Poorly soluble	-9.05	5.87e-07	8.81e-10	Poorly soluble	Low	No	Yes	No	No	No	No	Yes	-7.02	1	3	0	1	1	0.55	0	0	3	6.44
DCM48283	O[C@@H](c1cc(CC(=O)NC2CCCC2)c(=O)n(c1C)Cc1ccccc1)N(C(C)C)C(C)C	C27H39N3O3	453.62	33	12	0.56	10	4	2	133.98	74.57	4.42	3.18	3.59	3.31	4.46	3.79	-4.26	0.0246	5.43e-05	Moderately soluble	-4.42	0.0174	3.83e-05	Moderately soluble	-6.31	0.000224	4.94e-07	Poorly soluble	High	Yes	Yes	No	No	No	Yes	Yes	-6.81	0	2	0	0	0	0.55	0	1	2	4.33
DCM48505	CCNC(=O)[C@H]1CCCN(CC1)C(=O)c1cccc(c1)Cl	C16H21ClN2O2	308.8	21	6	0.5	5	2	1	87.8	49.41	2.77	2.5	2.34	2.47	2.83	2.58	-3.21	0.19	0.000615	Soluble	-3.18	0.203	0.000656	Soluble	-4.51	0.0095	3.08e-05	Moderately soluble	High	Yes	No	No	No	No	No	No	-6.41	0	0	0	0	0	0.55	0	0	0	2.48
DCM4887	O=C(CC1=NC(=O)NC(=O)C1)NCc1ccccc1	C13H13N3O3	259.26	19	6	0.23	5	4	2	75.65	87.63	1.29	0.35	-0.14	0.74	1.99	0.85	-1.57	6.95	0.0268	Very soluble	-1.75	4.56	0.0176	Very soluble	-4.18	0.017	6.56e-05	Moderately soluble	High	No	No	No	No	No	No	No	-7.63	0	0	0	0	0	0.55	0	0	0	2.73
DCM49085	N#CCCN(C(=O)Nc1ccc(c(c1)C(=O)NC)OC)CCN(c1ccccc1)C(=O)N[C@@H](C(=O)N[C@@H](C(=O)NC)CC(C)C)Cc1ccccc1	C38H48N8O6	712.84	52	18	0.37	24	7	5	198.18	185	3.78	3.34	3.72	1.94	3.38	3.23	-5.04	0.00656	9.21e-06	Moderately soluble	-6.9	8.93e-05	1.25e-07	Poorly soluble	-9.98	7.45e-08	1.04e-10	Poorly soluble	Low	No	Yes	No	No	Yes	No	No	-8.28	2	3	2	1	3	0.17	0	0	2	5.59
DCM49160	CCCCN([C@H](c1ccc(cc1OC)OC)C(=O)NC1CCCCC1)[C@H](/C=N/C(=O)c1ccco1)O	C27H37N3O6	499.6	36	11	0.52	14	8	2	137.5	113.6	4.72	4.4	3.79	1.44	4.25	3.72	-5.01	0.00486	9.74e-06	Moderately soluble	-6.5	0.000157	3.14e-07	Poorly soluble	-6.14	0.000358	7.16e-07	Poorly soluble	High	No	Yes	No	No	Yes	Yes	Yes	-6.22	0	3	1	0	0	0.55	0	2	3	5.06
DCM49180	COc1c(OC)cc(cc1OC)C(=O)N1CCC(CC1)NC(=O)[C@H](Cc1ccccc1C)NC(=O)C	C27H35N3O6	497.58	36	12	0.44	12	6	2	139.53	106.2	3.71	2.87	2.11	1.27	3.63	2.72	-4.19	0.0323	6.49e-05	Moderately soluble	-4.76	0.00865	1.74e-05	Moderately soluble	-6.79	8.01e-05	1.61e-07	Poorly soluble	High	No	Yes	No	No	No	Yes	Yes	-7.3	0	3	1	0	0	0.55	0	0	2	4.17
DCM49203	O=C(NC1CCCCC1)CN1CCC(CC1)(NC(=O)C)c1cccc(c1)F	C21H30FN3O2	375.48	27	6	0.62	7	4	2	107.13	61.44	3.07	2.67	2.63	2.4	3.29	2.81	-3.55	0.105	0.00028	Soluble	-3.61	0.0917	0.000244	Soluble	-5.56	0.00103	2.75e-06	Moderately soluble	High	Yes	Yes	No	No	No	Yes	No	-6.69	0	0	0	0	0	0.55	0	0	1	2.7
DCM49591	O=C(c1ccccc1)Nc1ccc2c(c1)n(C)c(=O)n2C	C16H15N3O2	281.31	21	15	0.12	3	2	1	82.94	56.03	2.51	1.76	1.94	2.36	1.66	2.04	-3.02	0.266	0.000947	Soluble	-2.55	0.785	0.00279	Soluble	-4.46	0.00984	3.5e-05	Moderately soluble	High	Yes	No	Yes	No	No	No	No	-6.77	0	0	0	0	0	0.55	0	0	0	2.01
DCM50478	O=C(CN1CCC(CC1)C(=O)c1ccc(cc1)C)NCc1ccc(cc1)F	C22H25FN2O2	368.44	27	12	0.36	7	4	1	107.4	49.41	3.09	3.4	3.23	2.8	4.39	3.38	-4.13	0.0271	7.36e-05	Moderately soluble	-4.12	0.0281	7.64e-05	Moderately soluble	-6.78	6.1e-05	1.66e-07	Poorly soluble	High	Yes	No	No	Yes	No	Yes	Yes	-6.13	0	0	0	0	0	0.55	0	0	1	2.81
DCM50581	Fc1ccc(cc1)CNC(=O)c1[nH]cc(c1)C(=O)C1CC1	C16H15FN2O2	286.3	21	11	0.25	6	3	2	75.93	61.96	2.04	2.06	2.88	1.74	3.79	2.5	-2.9	0.357	0.00125	Soluble	-2.99	0.293	0.00102	Soluble	-5.35	0.00127	4.45e-06	Moderately soluble	High	Yes	Yes	Yes	Yes	No	Yes	No	-6.58	0	0	0	0	0	0.55	0	0	0	2.21
DCM50757	COc1ccc(cc1)CNC(=O)[C@@H](Cc1ccccc1)NC(=O)C1CCNCC1	C23H29N3O3	395.49	29	12	0.39	10	4	3	116.26	79.46	3.59	2.37	1.51	1.67	3.4	2.51	-3.43	0.146	0.00037	Soluble	-3.68	0.0828	0.000209	Soluble	-7.04	3.64e-05	9.2e-08	Poorly soluble	High	No	Yes	No	No	No	Yes	Yes	-7.03	0	0	0	0	0	0.55	0	0	2	3.09
DCM50768	Fc1ccc(cc1)CNC(=O)[C@@H](NC(=O)C1CCNCC1)Cc1ccccc1	C22H26FN3O2	383.46	28	12	0.36	9	4	3	109.72	70.23	2.74	2.5	2.06	2.38	3.75	2.69	-3.52	0.117	0.000305	Soluble	-3.62	0.0919	0.00024	Soluble	-7.2	2.44e-05	6.35e-08	Poorly soluble	High	Yes	Yes	No	No	No	Yes	Yes	-6.86	0	0	0	0	0	0.55	0	0	2	3.04
DCM51005	CC1CCN(CC1)CC(=O)Nc1cccc(c1)Cl	C14H19ClN2O	266.77	18	6	0.5	4	2	1	79.3	32.34	2.68	3.89	2.44	2.51	2.67	2.84	-3.93	0.0315	0.000118	Soluble	-4.27	0.0144	5.41e-05	Moderately soluble	-4.3	0.0133	5e-05	Moderately soluble	High	Yes	No	Yes	No	No	Yes	No	-5.17	0	0	0	0	0	0.55	0	0	1	2.3
DCM5170	O=C(CN1C(=O)NC2(C1=O)CCCCCC2)NCc1ccc(cc1)F	C18H22FN3O3	347.38	25	6	0.5	5	4	2	97.37	78.51	2.41	2.22	1.59	1.64	2.38	2.05	-3.24	0.2	0.000575	Soluble	-3.5	0.109	0.000314	Soluble	-5.1	0.00276	7.94e-06	Moderately soluble	High	No	Yes	No	No	No	No	No	-6.84	0	0	0	0	0	0.55	0	1	0	2.94
DCM51876	C[C@@H](c1ccccc1)NC(=O)[C@@H](N1C(=O)[C@H]2[C@H](C1=O)[C@@H]1C[C@H]2CC1)Cc1ccccc1	C26H28N2O3	416.51	31	12	0.42	7	3	1	122.26	66.48	3.34	4.13	2.8	3.17	3.78	3.44	-4.85	0.0059	1.42e-05	Moderately soluble	-5.23	0.00244	5.85e-06	Moderately soluble	-6.39	0.000169	4.05e-07	Poorly soluble	High	Yes	Yes	No	Yes	Yes	Yes	Yes	-5.91	0	0	0	0	0	0.55	0	1	2	4.04
DCM52095	O=C(c1ccc(c(c1)S(=O)(=O)N1CCCCC1)Cl)NC[C@@H](c1ccccc1)O	C20H23ClN2O4S	422.93	28	12	0.35	7	5	2	111.92	95.09	3.19	2.67	3.35	2.11	2.62	2.79	-4	0.0424	0.0001	Soluble	-4.32	0.0203	4.8e-05	Moderately soluble	-5.96	0.000464	1.1e-06	Moderately soluble	High	No	Yes	No	Yes	Yes	Yes	Yes	-6.98	0	0	0	0	0	0.55	0	0	1	3.29
DCM5248	CC(NC(=O)COC(=O)c1cc(O)nc2c1cccc2)C	C15H16N2O4	288.3	21	10	0.27	6	5	2	77.28	88.52	2.46	2.17	1.62	1.21	1.9	1.87	-2.95	0.323	0.00112	Soluble	-3.66	0.0628	0.000218	Soluble	-4.04	0.0265	9.18e-05	Moderately soluble	High	No	No	Yes	No	No	No	No	-6.52	0	0	0	0	0	0.55	0	0	0	2.23
DCM52537	COc1ccccc1CNC(=O)[C@@H](C(C)C)NC(=O)C1CCCCC1	C20H30N2O3	346.46	25	6	0.6	9	3	2	99.47	67.43	3.75	3.8	2.88	2.07	3.46	3.19	-3.97	0.0375	0.000108	Soluble	-4.91	0.00426	1.23e-05	Moderately soluble	-5.2	0.00218	6.3e-06	Moderately soluble	High	Yes	No	No	No	No	Yes	No	-5.72	0	0	0	0	0	0.55	0	0	2	2.93
DCM52570	CC(NC(=O)c1ccc2c(c1)[nH]c(=S)n(c2=O)C1CCCC1)C	C17H21N3O2S	331.43	23	10	0.47	4	2	2	94.38	98.98	2.92	2.57	3.31	2.44	4.17	3.08	-3.57	0.0889	0.000268	Soluble	-4.3	0.0167	5.05e-05	Moderately soluble	-4.47	0.0111	3.36e-05	Moderately soluble	High	No	No	Yes	Yes	Yes	No	Yes	-6.5	0	0	0	0	0	0.55	0	1	0	2.57
DCM52676	O=C(C1CCN(CC1)S(=O)(=O)N1CCCCC1)NCc1ccc(cc1)F	C18H26FN3O3S	383.48	26	6	0.61	6	6	1	105.6	78.1	2.88	1.63	2.47	2.45	1.37	2.16	-3.02	0.367	0.000957	Soluble	-2.88	0.502	0.00131	Soluble	-4.16	0.0265	6.9e-05	Moderately soluble	High	Yes	Yes	No	No	No	Yes	No	-7.48	0	0	0	0	0	0.55	0	0	1	2.74
DCM52708	OC(=O)C[C@@H](c1ccccc1)CNC(=O)[C@@H]1CCCN1C(=O)OCc1ccccc1	C23H26N2O5	410.46	30	12	0.35	11	5	2	115.11	95.94	2.87	2.74	2.63	2.15	2.7	2.62	-3.68	0.0855	0.000208	Soluble	-4.41	0.016	3.9e-05	Moderately soluble	-5.37	0.00176	4.29e-06	Moderately soluble	High	No	Yes	No	No	Yes	No	Yes	-6.86	0	0	1	0	0	0.56	0	0	2	3.79
DCM52789	CCCn1c(=S)[nH]c2c(c1=O)ccc(c2)C(=O)NC[C@H]1CCCO1	C17H21N3O3S	347.43	24	10	0.47	6	3	2	95.46	108.21	3.01	1.8	2.38	1.22	4.09	2.5	-3.04	0.317	0.000911	Soluble	-3.69	0.0707	0.000203	Soluble	-4.7	0.00687	1.98e-05	Moderately soluble	High	No	Yes	Yes	Yes	Yes	No	Yes	-7.14	0	0	0	0	0	0.55	0	1	0	3.11
DCM52839	C[C@@H](c1ccccc1)NC(=O)COC(=O)c1ccc(cc1)S(=O)(=O)N1CCOCC1	C21H24N2O6S	432.49	30	12	0.33	9	7	1	112.93	110.39	3.31	1.79	2.12	0.99	1.83	2.01	-3.35	0.193	0.000446	Soluble	-3.73	0.0811	0.000188	Soluble	-5.45	0.00154	3.56e-06	Moderately soluble	High	No	Yes	No	Yes	Yes	No	Yes	-7.67	0	0	0	0	0	0.55	0	0	2	3.57
DCM53155	C[C@@H](NC(=O)COC(=O)c1cccc(c1O)C)CCc1ccccc1	C20H23NO4	341.4	25	12	0.3	9	4	2	96.23	75.63	3.38	4.43	2.99	2.9	3.83	3.51	-4.51	0.0106	3.1e-05	Moderately soluble	-5.74	0.000626	1.83e-06	Moderately soluble	-6.03	0.000317	9.29e-07	Poorly soluble	High	Yes	No	Yes	Yes	Yes	Yes	No	-5.24	0	0	0	0	0	0.55	0	0	2	2.94
DCM53228	C[C@@H](NC(=O)c1ccc(c(c1)S(=O)(=O)N1CCOCC1)C)CCc1ccccc1	C22H28N2O4S	416.53	29	12	0.41	8	5	1	116.61	84.09	3.03	3.08	3.47	2.06	3.26	2.98	-4.14	0.0301	7.23e-05	Moderately soluble	-4.51	0.0128	3.07e-05	Moderately soluble	-6.57	0.000113	2.72e-07	Poorly soluble	High	No	Yes	No	Yes	Yes	Yes	Yes	-6.65	0	0	0	0	0	0.55	0	0	2	3.58
DCM53313	C[C@H](NC(=O)COC(=O)c1ccccc1O)CCc1ccccc1	C19H21NO4	327.37	24	12	0.26	9	4	2	91.27	75.63	3.18	3.77	2.69	2.67	3.3	3.12	-4.02	0.0312	9.53e-05	Moderately soluble	-5.05	0.00291	8.88e-06	Moderately soluble	-5.65	0.000726	2.22e-06	Moderately soluble	High	Yes	No	Yes	Yes	Yes	Yes	No	-5.62	0	0	0	0	0	0.55	0	0	2	2.73
DCM53436	O=C(NCc1ccccc1)COC(=O)CSc1ccccc1C	C18H19NO3S	329.41	23	12	0.22	9	3	1	91.13	80.7	3	3.56	2.79	3	3.78	3.23	-3.92	0.0399	0.000121	Soluble	-4.94	0.00378	1.15e-05	Moderately soluble	-6.29	0.000169	5.13e-07	Poorly soluble	High	No	No	Yes	Yes	Yes	Yes	No	-5.78	0	0	0	0	0	0.55	0	0	2	2.79
DCM55136	COc1ccccc1CN1CCNC(=O)/C/1=C/[C@H](NCc1csc(n1)C)O	C19H24N4O3S	388.48	27	11	0.37	7	5	3	111.78	114.96	2.94	1.35	0.32	0.03	3.06	1.54	-2.94	0.447	0.00115	Soluble	-3.37	0.167	0.00043	Soluble	-5.01	0.00381	9.79e-06	Moderately soluble	High	No	Yes	No	No	No	No	No	-7.71	0	0	0	0	0	0.55	0	2	1	3.84
DCM55420	O=C([C@@H](OC(=O)c1nn2c(n1)nccc2C)C)NCc1ccccc1	C17H17N5O3	339.35	25	15	0.24	7	6	1	88.94	98.48	2.69	1.92	1.14	1.55	1.34	1.73	-3.14	0.248	0.000732	Soluble	-3.61	0.083	0.000245	Soluble	-4.74	0.00613	1.81e-05	Moderately soluble	High	No	No	Yes	Yes	No	No	No	-7.01	0	0	0	0	0	0.55	0	0	0	3.06
DCM55533	O[C@@H](/C(=N\C(=O)OC(C)(C)C)/Cc1ccccc1)N1CCC(CC1)C(=O)NCC(=O)O	C22H31N3O6	433.5	31	6	0.55	11	8	3	119.54	128.53	2.77	-0.41	1.46	1.34	2.01	1.43	-1.69	8.92	0.0206	Very soluble	-1.82	6.49	0.015	Very soluble	-3.43	0.16	0.000369	Soluble	High	No	Yes	No	No	No	No	No	-9.24	0	0	1	0	0	0.55	0	1	2	4.55
DCM55540	CC(C[C@@H](C(=O)O)NC(=O)[C@@H]1CC[C@H](CC1)CNC(=O)[C@H](Cc1ccccc1)NC(=O)OC(C)(C)C)C	C28H43N3O6	517.66	37	6	0.64	16	6	4	142.53	133.83	3.48	4.32	3.66	2.17	3.64	3.45	-4.84	0.00757	1.46e-05	Moderately soluble	-6.84	7.41e-05	1.43e-07	Poorly soluble	-5.87	0.000706	1.36e-06	Moderately soluble	Low	No	Yes	No	No	No	No	Yes	-6.39	1	3	1	1	1	0.56	0	0	3	4.95
DCM55541	O=C(OC(C)(C)C)N[C@H](C(=O)NC[C@@H]1CC[C@H](CC1)C(=O)N[C@H](C(=O)O)Cc1ccccc1)C(C)C	C27H41N3O6	503.63	36	6	0.63	15	6	4	137.72	133.83	2.97	3.62	3.27	1.97	3.21	3.01	-4.38	0.0212	4.2e-05	Moderately soluble	-6.12	0.000384	7.62e-07	Poorly soluble	-5.48	0.00168	3.34e-06	Moderately soluble	Low	No	Yes	No	No	No	No	Yes	-6.8	1	3	1	1	0	0.56	0	0	3	4.83
DCM56045	COc1ccc(cc1)CNC(=O)CCc1nc2n(c1O)c(SCC(=O)NC[C@@H]1CCCO1)nc1c2cccc1	C28H31N5O5S	549.64	39	19	0.36	13	7	3	148.42	152.38	4.04	4.04	3.08	1.38	3.59	3.23	-5.3	0.00278	5.06e-06	Moderately soluble	-6.94	6.26e-05	1.14e-07	Poorly soluble	-7.98	5.81e-06	1.06e-08	Poorly soluble	Low	No	Yes	No	Yes	Yes	Yes	Yes	-6.78	1	2	2	1	1	0.55	0	0	3	4.35
DCM56458	O=C([C@H]1CCC(=O)N(C1)C1CC1)NCc1cccc(c1)Cl	C16H19ClN2O2	306.79	21	6	0.5	5	2	1	85.47	49.41	2.2	1.75	1.76	2.2	2.84	2.15	-2.73	0.577	0.00188	Soluble	-2.4	1.21	0.00394	Soluble	-4.39	0.0126	4.1e-05	Moderately soluble	High	Yes	Yes	No	Yes	No	No	No	-6.93	0	0	0	0	0	0.55	0	0	0	2.47
DCM57012	OC/C(=N\C(=O)/C=C/1\CCCC/C(=C/[C@@H](OC(C)(C)C)O)/C(=O)OC[C@H](N[C@H]1O)C)/Cc1ccccc1	C28H40N2O7	516.63	37	6	0.54	8	9	4	145.79	137.68	3.21	2.1	2.21	1.69	3.83	2.61	-3.96	0.0569	0.00011	Soluble	-4.62	0.0123	2.39e-05	Moderately soluble	-4.78	0.00865	1.67e-05	Moderately soluble	High	No	Yes	No	No	No	No	No	-7.96	1	3	0	1	0	0.55	0	3	2	6.02
DCM57013	OC/C(=N\C(=O)/C=C/1\CCCC/C(=C/C(=O)OC(C)(C)C)/[C@H](OC[C@@H](N[C@H]1O)Cc1ccccc1)O)/Cc1ccccc1	C34H44N2O7	592.72	43	12	0.44	10	9	4	170.28	137.68	4.78	3.3	3.43	2.6	5.05	3.83	-5.14	0.00429	7.24e-06	Moderately soluble	-5.87	0.000805	1.36e-06	Moderately soluble	-7	5.98e-05	1.01e-07	Poorly soluble	Low	No	Yes	No	No	No	No	No	-7.57	1	3	0	1	0	0.55	0	2	2	6.46
DCM57014	OC/C(=N\C(=O)/C=C/1\CCCC/C(=C/[C@@H](OC(C)(C)C)O)/C(=O)OC[C@H](N[C@H]1O)C)/Cc1ccccc1	C28H40N2O7	516.63	37	6	0.54	8	9	4	145.79	137.68	3.21	2.1	2.21	1.69	3.83	2.61	-3.96	0.0569	0.00011	Soluble	-4.62	0.0123	2.39e-05	Moderately soluble	-4.78	0.00865	1.67e-05	Moderately soluble	High	No	Yes	No	No	No	No	No	-7.96	1	3	0	1	0	0.55	0	3	2	6.02
DCM57017	OC/C(=N\C(=O)/C=C/1\CCCCC[C@@H](C(=O)OC[C@@H](N[C@@H]1O)C)Cc1ccc(cc1)F)/Cc1ccccc1	C30H37FN2O5	524.62	38	12	0.43	7	8	3	149.19	108.22	4.09	4.21	3.96	3.45	5.37	4.21	-5.52	0.0016	3.04e-06	Moderately soluble	-6.19	0.000337	6.42e-07	Poorly soluble	-7.56	1.44e-05	2.74e-08	Poorly soluble	High	No	Yes	No	No	No	No	Yes	-6.51	1	3	0	0	0	0.55	0	2	2	5.78
DCM57018	OC/C(=N\C(=O)/C=C/1\CCCC/C(=N/C(=O)OCC2c3ccccc3c3c2cccc3)/[C@H](OC[C@@H](N[C@@H]1O)C(C)(C)C)O)/Cc1ccccc1	C40H47N3O7	681.82	50	18	0.4	10	10	4	198.01	150.04	4.86	5.23	5.36	3.49	6.42	5.07	-6.97	7.33e-05	1.08e-07	Poorly soluble	-8.13	5.06e-06	7.43e-09	Poorly soluble	-9.43	2.51e-07	3.68e-10	Poorly soluble	Low	No	Yes	No	No	No	No	No	-6.75	1	3	1	1	3	0.55	0	2	3	7.31
DCM57019	OC/C(=N\C(=O)/C=C/1\CCCC/C(=C/C(=O)OC(C)(C)C)/[C@H](OC[C@H]2N([C@@H]1O)CCC2)O)/Cc1ccccc1	C30H42N2O7	542.66	39	6	0.57	8	9	3	153.38	128.89	3.83	2.3	2.69	2.07	3.6	2.9	-4.24	0.0313	5.76e-05	Moderately soluble	-4.64	0.0123	2.27e-05	Moderately soluble	-4.25	0.0303	5.58e-05	Moderately soluble	High	No	Yes	No	No	No	No	No	-7.98	1	3	0	0	0	0.55	0	2	2	6.39
DCM57021	CCOC(=O)CCCCCC(=O)Nc1ccc2c(c1)CC(=O)N(C[C@H]([C@H](O2)CN(C(=O)Nc1ccc(cc1)C(F)(F)F)C)C)[C@H](CO)C	C34H45F3N4O7	678.74	48	12	0.53	18	10	3	178.59	137.51	5	4	5.86	2.89	4.89	4.53	-5.57	0.00185	2.72e-06	Moderately soluble	-6.59	0.000175	2.57e-07	Poorly soluble	-8.57	1.84e-06	2.7e-09	Poorly soluble	Low	No	Yes	No	No	No	No	Yes	-7.6	2	4	1	1	2	0.17	0	0	3	6.12
DCM57024	OC[C@H](N1C[C@@H](C)[C@@H](CN(C(=O)Nc2ccc(cc2)F)C)Oc2c(CC1=O)cc(cc2)NC(=O)CCC(F)(F)F)C	C28H34F4N4O5	582.59	41	12	0.46	12	9	3	148.42	111.21	3.68	3.24	5.34	2.66	3.56	3.7	-4.92	0.00704	1.21e-05	Moderately soluble	-5.25	0.00329	5.64e-06	Moderately soluble	-7.29	3.02e-05	5.19e-08	Poorly soluble	Low	No	Yes	No	No	No	Yes	Yes	-7.55	1	3	1	0	0	0.55	0	0	2	5.35
DCM57039	OC[C@H](N1C[C@H](C)[C@@H](CN(C(=O)NC2CCCCC2)C)Oc2c(C1=O)cccc2NC(=O)c1ccc(cc1)c1nccs1)C	C33H41N5O5S	619.77	44	17	0.45	11	6	3	175.78	152.34	4.64	4.4	4.69	2.28	4.25	4.05	-6.01	0.000599	9.67e-07	Poorly soluble	-7.32	2.99e-05	4.83e-08	Poorly soluble	-7.83	9.13e-06	1.47e-08	Poorly soluble	Low	No	Yes	No	No	No	No	Yes	-6.96	1	3	2	1	2	0.55	0	0	3	5.47
DCM57042	OC[C@H](N1C[C@@H](C)[C@H](CN(Cc2ccncc2)C)Oc2c(CC1=O)cc(cc2)NC(=O)Nc1ccc(cc1)C(F)(F)F)C	C31H36F3N5O4	599.64	43	18	0.39	11	9	3	160.93	107.03	3.72	3.58	5.26	2.58	3.76	3.78	-5.4	0.0024	4.01e-06	Moderately soluble	-5.51	0.00184	3.06e-06	Moderately soluble	-8.77	1.01e-06	1.68e-09	Poorly soluble	High	No	Yes	No	No	No	Yes	Yes	-7.42	1	3	1	0	0	0.55	0	0	3	5.43
DCM57151	O=C(Nc1ccc(cc1)C(=O)N(CCc1ccccc1)C)Cc1ccc(cc1)NC(=O)[C@H]1CCCN(C1)C(=O)C1CCCCC1	C37H44N4O4	608.77	45	18	0.41	14	4	2	182.41	98.82	4.64	5.32	5.18	3.76	5.44	4.87	-6.34	0.00028	4.59e-07	Poorly soluble	-7.15	4.34e-05	7.13e-08	Poorly soluble	-9.88	7.95e-08	1.31e-10	Poorly soluble	High	No	Yes	No	Yes	Yes	Yes	Yes	-6.24	1	3	1	0	2	0.55	0	0	3	4.49
DCM57189	CC(C[C@H]1CN([C@H](Cc2ccc(cc2)O)CN2CCC[C@@H]2CN2[C@H](CNC(=O)C2=O)Cc2ccccc2)C(=O)C(=O)N1CC1CCCCCC1)C	C41H57N5O5	699.92	51	12	0.61	13	6	2	218.82	113.5	3.58	7.32	2.49	2.58	4.98	4.19	-8.11	5.47e-06	7.81e-09	Poorly soluble	-9.53	2.06e-07	2.95e-10	Poorly soluble	-8.5	2.22e-06	3.17e-09	Poorly soluble	High	No	Yes	No	No	No	No	Yes	-5.37	1	3	1	0	2	0.55	0	1	3	5.77
DCM57239	COc1ccc(cc1)Cn1c(C)c(cc(c1=O)CC(=O)NCCCCc1ccccc1)[C@H](N(C)C)O	C29H37N3O4	491.62	36	18	0.38	13	5	2	143.04	83.8	3.48	2.96	3.12	2.95	5.04	3.51	-4.26	0.0267	5.43e-05	Moderately soluble	-4.38	0.0204	4.14e-05	Moderately soluble	-8.5	1.55e-06	3.16e-09	Poorly soluble	High	No	Yes	No	Yes	No	Yes	Yes	-7.2	0	3	1	0	0	0.55	0	1	2	4.32
DCM57289	COc1ccc(cc1)Cn1c(C)c(cc(c1=O)CC(=O)NCCCCc1ccccc1)[C@H](N(C(C)C)C(C)C)O	C33H45N3O4	547.73	40	18	0.45	15	5	2	162.26	83.8	5.04	4.56	4.68	3.71	6.37	4.87	-5.45	0.00194	3.53e-06	Moderately soluble	-6.04	0.000496	9.06e-07	Poorly soluble	-9.31	2.71e-07	4.94e-10	Poorly soluble	High	No	Yes	No	Yes	No	Yes	Yes	-6.4	1	3	1	0	0	0.55	0	1	3	4.81
DCM58111	O=C(Nc1cccc(c1)C(F)(F)F)CSc1nc(C)cc(n1)O	C14H12F3N3O2S	343.32	23	12	0.21	6	7	2	79.58	100.41	2.42	3.21	4.2	2.05	3.05	2.99	-3.98	0.0359	0.000104	Soluble	-4.99	0.00351	1.02e-05	Moderately soluble	-5.35	0.00154	4.48e-06	Moderately soluble	High	No	No	Yes	Yes	No	No	Yes	-6.12	0	0	0	0	0	0.55	0	0	0	2.45
DCM59381	CCOc1ccc(cc1)NC(=O)[C@H](Cc1ccccc1)NC(=O)C1CCNCC1	C23H29N3O3	395.49	29	12	0.39	10	4	3	117.79	79.46	3.58	2.8	2.18	1.94	3.4	2.78	-3.7	0.0785	0.000198	Soluble	-4.13	0.0296	7.49e-05	Moderately soluble	-7.04	3.64e-05	9.2e-08	Poorly soluble	High	No	Yes	No	No	No	Yes	Yes	-6.72	0	0	0	0	0	0.55	0	0	2	3.17
DCM59693	Clc1cccc(c1)CNC(=O)c1cc(O)nc2c1cccc2	C17H13ClN2O2	312.75	22	16	0.06	4	3	2	86.26	62.22	2.7	3.57	3.37	2.89	3.6	3.23	-4.3	0.0156	4.99e-05	Moderately soluble	-4.56	0.00857	2.74e-05	Moderately soluble	-6.65	7.05e-05	2.25e-07	Poorly soluble	High	Yes	No	Yes	Yes	Yes	Yes	Yes	-5.67	0	0	0	0	0	0.55	0	0	1	2
DCM59725	C[C@@H]1CC[C@@]2(CC1)NC(=O)N(C2=O)CC(=O)NCc1ccc(cc1)F	C18H22FN3O3	347.38	25	6	0.5	5	4	2	97.37	78.51	2.8	1.93	1.45	2.05	2.24	2.09	-3.06	0.304	0.000876	Soluble	-3.2	0.218	0.000627	Soluble	-4.98	0.00365	1.05e-05	Moderately soluble	High	No	Yes	No	No	No	No	No	-7.05	0	0	0	0	0	0.55	0	1	0	3.66
DCM61266	O=C([C@H](N(c1ccccc1C(=O)C)C(=O)Cn1nnc2c1cccc2)c1ccc(cc1)N1CCOCC1)NC[C@@H]1CCCO1	C33H36N6O5	596.68	44	21	0.36	12	7	1	168.75	118.89	3.64	3.18	2.84	1.75	3.15	2.91	-5.1	0.0047	7.87e-06	Moderately soluble	-5.35	0.00268	4.49e-06	Moderately soluble	-7.73	1.1e-05	1.85e-08	Poorly soluble	High	No	Yes	No	Yes	Yes	Yes	Yes	-7.68	2	3	1	0	0	0.17	1	0	2	4.96
DCM61346	COc1cccc(c1OC)[C@@H](N([C@H](/C=C/C(=O)Nc1noc(c1)C)O)Cc1ccccc1)C(=O)NC(CC)(C)C	C30H38N4O6	550.65	40	17	0.37	15	8	3	152.43	126.16	3.41	4.01	3.69	1.85	4.08	3.41	-5.1	0.00433	7.86e-06	Moderately soluble	-6.36	0.000239	4.35e-07	Poorly soluble	-7.65	1.24e-05	2.26e-08	Poorly soluble	High	No	Yes	No	No	No	Yes	Yes	-6.81	1	3	1	0	0	0.55	0	2	3	5.14
DCM61537	CCC(=O)N1CCc2c1ccc(c2)S(=O)(=O)N[C@@H](C(=O)NC1CCCC1)Cc1ccccc1	C25H31N3O4S	469.6	33	12	0.44	10	5	2	131.17	103.96	2.61	3.36	3.63	2.22	3.04	2.97	-4.48	0.0156	3.33e-05	Moderately soluble	-5.22	0.00282	6.01e-06	Moderately soluble	-6.99	4.86e-05	1.04e-07	Poorly soluble	High	No	Yes	No	Yes	Yes	Yes	Yes	-6.78	0	1	0	0	0	0.55	0	0	2	4.09
DCM62274	C[C@@H]1CCC[C@@H](N1C(=O)COC(=O)c1cc(O)nc2c1cccc2)C	C19H22N2O4	342.39	25	10	0.42	5	5	1	98.4	79.73	2.68	3.26	2.51	2.18	2.4	2.6	-3.98	0.0356	0.000104	Soluble	-4.61	0.00844	2.46e-05	Moderately soluble	-4.17	0.023	6.73e-05	Moderately soluble	High	No	No	No	No	Yes	No	No	-6.07	0	0	0	0	0	0.55	0	0	0	3.27
DCM62881	O[C@@H](CN1CCN(C[C@H]1C(=O)NC(C)(C)C)Cc1cccnc1)C[C@H](C(=O)N[C@@H]1[C@@H](O)Cc2c1cccc2)Cc1ccccc1	C36H47N5O4	613.79	45	18	0.47	14	7	4	182.62	118.03	4.15	2.92	1.63	1.33	3.97	2.8	-4.86	0.00853	1.39e-05	Moderately soluble	-5.06	0.00535	8.71e-06	Moderately soluble	-8.44	2.25e-06	3.67e-09	Poorly soluble	High	No	Yes	No	No	No	No	No	-7.97	1	3	1	0	1	0.55	0	0	2	5.6
DCM62943	CNC(=O)[C@H]1C[C@@H]1[C@H](c1ccccc1)NC(=O)CNC(=O)OCc1ccccc1	C22H25N3O4	395.45	29	12	0.32	12	4	3	107.52	96.53	3.18	1.98	1.68	1.53	2.38	2.15	-3.05	0.35	0.000884	Soluble	-3.63	0.0921	0.000233	Soluble	-6.2	0.000252	6.37e-07	Poorly soluble	High	No	Yes	No	No	Yes	Yes	Yes	-7.31	0	0	1	0	0	0.55	0	0	2	3.79
DCM63228	CC(=O)N[C@@H](C(=O)NC1CCN(CC1)S(=O)(=O)c1ccccc1)Cc1ccc(cc1)C	C23H29N3O4S	443.56	31	12	0.39	9	5	2	122.95	103.96	3.39	2.64	2.71	1.54	2.27	2.51	-3.95	0.0503	0.000113	Soluble	-4.47	0.0149	3.36e-05	Moderately soluble	-6.44	0.00016	3.6e-07	Poorly soluble	High	No	Yes	No	No	Yes	Yes	Yes	-7.13	0	0	0	0	0	0.55	0	0	2	3.95
DCM63536	O=C([C@@H](NC(=O)[C@@H]1Cc2ccccc2CN1C(=O)OC(C)(C)C)C)NC1CCCC1	C23H33N3O4	415.53	30	6	0.61	9	4	2	118.78	87.74	3.93	3.04	2.38	1.98	2.5	2.77	-3.89	0.0541	0.00013	Soluble	-4.55	0.0118	2.83e-05	Moderately soluble	-4.74	0.00765	1.84e-05	Moderately soluble	High	No	Yes	No	No	No	Yes	Yes	-6.68	0	0	0	0	0	0.55	0	0	2	4.05
DCM64364	C[C@@H](/C(=N\C(=O)COC(=O)c1cc(ccc1F)S(=O)(=O)N1CCOCC1)/Cc1ccccc1)O	C23H25FN2O7S	492.52	34	12	0.35	10	10	1	124.55	130.95	2.6	1.81	2.71	1.35	3.1	2.32	-3.64	0.114	0.000232	Soluble	-4.18	0.0326	6.62e-05	Moderately soluble	-5.54	0.00143	2.91e-06	Moderately soluble	High	No	Yes	No	Yes	No	No	Yes	-8.02	0	1	0	0	0	0.55	0	1	2	4.35
DCM6447	CC([C@H](N([C@@H](/C=N/S(=O)(=O)c1ccccc1)O)CCN1CCOCC1)C(=O)NC(C)(C)C)C	C23H38N4O5S	482.64	33	6	0.65	12	8	2	133.01	119.92	3.28	2.01	2.04	1.01	1.89	2.05	-3.44	0.175	0.000362	Soluble	-4.16	0.0338	6.99e-05	Moderately soluble	-4.14	0.0346	7.18e-05	Moderately soluble	High	No	Yes	No	No	No	No	No	-7.82	0	3	1	0	0	0.55	0	2	2	4.95
DCM64526	O=C(Nc1c(C)cc(cc1C)C)CN([C@@H](c1cn(c(c1)O)c1cccc2c1cccc2)O)C	C27H29N3O3	443.54	33	21	0.22	7	4	3	132.67	77.73	3.47	4.83	4.31	3.41	3.95	3.99	-5.64	0.00101	2.28e-06	Moderately soluble	-6.2	0.000283	6.37e-07	Poorly soluble	-7.56	1.21e-05	2.74e-08	Poorly soluble	High	No	Yes	No	Yes	Yes	Yes	Yes	-5.58	0	1	0	0	0	0.55	0	1	2	3.83
DCM6485	O=C([C@@H](N(c1ccc(cc1C)C)[C@H](/C=N/C(=O)c1ccco1)O)c1ccccc1)NC[C@H]1CCCO1	C28H31N3O5	489.56	36	17	0.32	11	6	2	137.52	104.37	3.67	4.32	3.64	1.93	4.51	3.62	-5.22	0.00295	6.02e-06	Moderately soluble	-6.23	0.000291	5.95e-07	Poorly soluble	-7.18	3.26e-05	6.65e-08	Poorly soluble	High	No	Yes	No	Yes	Yes	Yes	Yes	-6.22	0	2	1	0	0	0.55	0	2	3	5.02
DCM6489	COc1ccc(cc1)CN([C@H](c1cccc(c1OC)OC)C(=O)NC(C)(C)C)[C@@H](/C=C/C(=O)Nc1noc(c1)C)O	C30H38N4O7	566.65	41	17	0.37	15	9	3	154.12	135.39	4.5	3.45	3.31	1.36	3.77	3.28	-4.84	0.00812	1.43e-05	Moderately soluble	-5.97	0.000601	1.06e-06	Moderately soluble	-7.35	2.54e-05	4.48e-08	Poorly soluble	Low	No	Yes	No	No	No	Yes	Yes	-7.31	2	3	1	1	0	0.17	0	2	2	5.2
DCM65035	COCCn1c(=O)[nH]c2c(c1=O)ccc(c2)C(=O)NCCCN1CCCC[C@@H]1CC	C22H32N4O4	416.51	30	10	0.59	10	5	2	121.75	96.43	3.61	1.96	1.34	1.99	3.25	2.43	-3.24	0.238	0.00057	Soluble	-3.61	0.102	0.000245	Soluble	-5.66	0.000905	2.17e-06	Moderately soluble	High	No	Yes	No	No	No	No	Yes	-7.45	0	0	0	0	0	0.55	0	0	2	3.68
DCM65267	CSCC[C@@H](C(=O)O)NC(=O)[C@@H]1CC[C@@H](CC1)CNC(=O)[C@@H](Cc1ccccc1)N	C22H33N3O4S	435.58	30	6	0.59	13	5	4	119.47	146.82	2.64	-0.85	1.8	1.36	2.56	1.5	-1.3	22.1	0.0507	Very soluble	-1.75	7.7	0.0177	Very soluble	-4.72	0.00826	1.9e-05	Moderately soluble	Low	No	Yes	No	No	No	No	No	-9.56	0	0	2	1	0	0.55	0	0	2	4.22
DCM65270	N[C@@H](C(=O)NC[C@@H]1CC[C@H](CC1)C(=O)N[C@@H](C(=O)O)Cc1ccccc1)C(C)C	C22H33N3O4	403.52	29	6	0.59	11	5	4	111.88	121.52	2.39	-1.42	1.7	1.36	2.27	1.26	-0.87	53.9	0.134	Very soluble	-0.63	94.7	0.235	Very soluble	-4.27	0.0218	5.41e-05	Moderately soluble	High	No	Yes	No	No	No	No	No	-9.77	0	0	1	0	0	0.55	0	0	2	3.85
DCM655	COC(=O)C1CCN(CC1)C(=O)c1cc(O)nc2c1cccc2	C17H18N2O4	314.34	23	10	0.35	4	5	1	88.78	79.73	2.61	1.97	1.58	1.71	1.91	1.96	-3.09	0.257	0.000817	Soluble	-3.27	0.169	0.000537	Soluble	-3.63	0.0742	0.000236	Soluble	High	No	No	No	No	No	No	No	-6.82	0	0	0	0	0	0.55	0	0	0	2.55
DCM6579	COc1cccc(c1)C[C@H](C(=O)NC1CCN(CC1)S(=O)(=O)c1cccc2c1cccc2)NC(=O)C	C27H31N3O5S	509.62	36	16	0.33	10	6	2	141.98	113.19	3.82	3.5	3.57	1.66	2.86	3.08	-4.87	0.00682	1.34e-05	Moderately soluble	-5.56	0.0014	2.75e-06	Moderately soluble	-7.79	8.28e-06	1.63e-08	Poorly soluble	High	No	Yes	No	Yes	Yes	Yes	Yes	-6.92	1	2	0	0	0	0.55	0	0	2	4.26
DCM65954	COc1ccc(cc1)SC[C@H](N1CC[C@H](CCC1=O)NC(=O)OCc1ccccc1)Cc1ccccc1	C30H34N2O4S	518.67	37	18	0.33	12	4	1	151.07	93.17	4.5	5.62	5.17	3.94	5.24	4.89	-6.16	0.000355	6.85e-07	Poorly soluble	-7.34	2.37e-05	4.57e-08	Poorly soluble	-9.13	3.8e-07	7.33e-10	Poorly soluble	High	No	Yes	No	Yes	Yes	Yes	Yes	-5.47	1	3	1	0	1	0.55	0	0	3	4.7
DCM65985	CN[C@H](C(=O)/N=C(/[C@H](N1CCC[C@H]1C(=O)N[C@H]1CCCc2c1cccc2)O)\C(C)C)C	C24H36N4O3	428.57	31	6	0.62	9	6	3	126.72	94.03	3.84	2.71	1.49	1.79	3.06	2.58	-3.75	0.0756	0.000176	Soluble	-4.34	0.0197	4.59e-05	Moderately soluble	-4.6	0.0108	2.51e-05	Moderately soluble	High	No	Yes	No	No	No	Yes	No	-6.99	0	0	0	0	0	0.55	0	1	2	5
DCM66013	OC/C(=N\C(=O)/C=C/1\CCCC/C(=N/C(=O)OCC2c3ccccc3c3c2cccc3)/[C@H](OC[C@H]2N([C@@H]1O)CCC2)O)/Cc1ccccc1	C39H43N3O7	665.77	49	18	0.38	9	10	3	191.44	141.25	3.9	4.46	4.82	3.32	5.51	4.4	-6.46	0.000233	3.5e-07	Poorly soluble	-7.15	4.76e-05	7.15e-08	Poorly soluble	-8.36	2.9e-06	4.36e-09	Poorly soluble	Low	No	Yes	No	No	No	No	No	-7.19	1	3	1	1	1	0.55	0	2	3	7.22
DCM66033	OC[C@@H](N1C[C@@H](C)[C@H](CN(C(=O)Nc2c(C)noc2C)C)Oc2c(C1=O)cc(cc2)NC(=O)Cc1ccccc1)C	C30H37N5O6	563.64	41	17	0.4	11	7	3	158.55	137.24	3.37	2.64	3.09	1.76	2.82	2.74	-4.58	0.0149	2.64e-05	Moderately soluble	-5.17	0.00379	6.72e-06	Moderately soluble	-7.59	1.44e-05	2.55e-08	Poorly soluble	Low	No	Yes	No	No	No	Yes	Yes	-7.86	2	3	1	1	0	0.17	0	0	2	5.38
DCM66045	OC[C@@H](N1C[C@H](C)[C@@H](CN(C(=O)Nc2ccccc2)C)Oc2c(CC1=O)cc(cc2)NC(=O)CCC(F)(F)F)C	C28H35F3N4O5	564.6	40	12	0.46	12	8	3	148.46	111.21	3.36	3.14	4.78	2.3	3.12	3.34	-4.75	0.0101	1.78e-05	Moderately soluble	-5.14	0.00404	7.16e-06	Moderately soluble	-7.03	5.28e-05	9.35e-08	Poorly soluble	High	No	Yes	No	No	No	Yes	Yes	-7.51	1	3	1	0	0	0.55	0	0	2	5.34
DCM6605	CC([C@@H](C(=O)NC1CCN(CC1)Cc1ccccc1)NC(=O)C1CCCCC1)C	C24H37N3O2	399.57	29	6	0.67	9	3	2	121.71	61.44	3.33	4.42	2.96	2.67	3.61	3.4	-4.66	0.00872	2.18e-05	Moderately soluble	-5.43	0.00149	3.73e-06	Moderately soluble	-5.53	0.00119	2.97e-06	Moderately soluble	High	Yes	No	No	No	No	Yes	Yes	-5.6	0	0	0	0	0	0.55	0	0	3	3.58
DCM66080	OC[C@@H](N1C[C@H](C)[C@@H](OCCCC[C@@H](Oc2c(C1=O)cc(cc2)NC(=O)Nc1ccc(cc1)F)C)CN(Cc1ccc(cc1)C(=O)O)C)C	C37H47FN4O7	678.79	49	18	0.43	11	9	4	190.39	140.67	3.92	2.53	5.6	2.96	3.82	3.77	-5.19	0.0044	6.48e-06	Moderately soluble	-5.13	0.00502	7.4e-06	Moderately soluble	-8.82	1.04e-06	1.53e-09	Poorly soluble	Low	No	Yes	No	No	No	No	Yes	-8.64	2	4	2	1	1	0.17	0	0	2	6.36
DCM66085	OC[C@@H](N1C[C@H](C)[C@@H](OCCCC[C@H](Oc2c(C1=O)cc(cc2)NC(=O)NC1CCCCC1)C)CN(C(=O)Cc1ccccc1)C)C	C37H54N4O6	650.85	47	12	0.59	11	6	3	189.18	120.44	4.82	5	5.07	2.91	3.96	4.35	-6.49	0.000211	3.25e-07	Poorly soluble	-7.27	3.5e-05	5.38e-08	Poorly soluble	-8.07	5.53e-06	8.49e-09	Poorly soluble	Low	No	Yes	No	No	No	No	Yes	-6.72	1	3	1	0	1	0.55	0	0	3	6.61
DCM66086	OC[C@@H](N1C[C@H](C)[C@@H](OCCCC[C@H](Oc2c(C1=O)cc(cc2)NC(=O)c1ccncc1)C)CN(C(=O)c1ccccc1)C)C	C35H44N4O6	616.75	45	18	0.43	9	7	2	177.18	121.3	3.86	4.01	4.33	1.79	3.63	3.52	-5.89	0.000791	1.28e-06	Moderately soluble	-6.26	0.000339	5.5e-07	Poorly soluble	-8.37	2.63e-06	4.27e-09	Poorly soluble	High	No	Yes	No	No	No	No	Yes	-7.22	1	3	0	0	1	0.55	0	0	3	6.01
DCM66087	OC[C@@H](N1C[C@H](C)[C@@H](OCCCC[C@H](Oc2c(C1=O)cc(cc2)NC(=O)c1ccccc1)C)CN(C(=O)NC1CCCCC1)C)C	C36H52N4O6	636.82	46	12	0.58	10	6	3	184.6	120.44	4.41	5.06	5.14	3	3.54	4.23	-6.51	0.000197	3.1e-07	Poorly soluble	-7.33	2.97e-05	4.66e-08	Poorly soluble	-7.69	1.31e-05	2.06e-08	Poorly soluble	Low	No	Yes	No	No	No	No	Yes	-6.59	1	3	0	0	2	0.55	0	0	3	6.45
DCM66223	O[C@H](c1cc(CC(=O)NC2CCCC2)c(=O)n(c1C)Cc1ccccc1)N(C)C	C23H31N3O3	397.51	29	12	0.48	8	4	2	114.75	74.57	3.54	1.58	2.03	2.48	3.17	2.56	-3.08	0.332	0.000835	Soluble	-2.76	0.696	0.00175	Soluble	-5.49	0.0013	3.26e-06	Moderately soluble	High	Yes	Yes	No	No	No	Yes	No	-7.6	0	0	0	0	0	0.55	0	1	2	3.86
DCM66277	OC[C@H](N1C[C@@H](C)[C@H](OCCCC[C@@H](Oc2c(C1=O)cc(cc2)NC(=O)NC1CCCCC1)C)CN(C(=O)NC(C)C)C)C	C33H55N5O6	617.82	44	6	0.73	11	6	4	177.5	132.47	4.16	4.03	4.41	2.47	2.39	3.49	-5.58	0.00161	2.6e-06	Moderately soluble	-6.52	0.000189	3.05e-07	Poorly soluble	-6.07	0.000526	8.51e-07	Poorly soluble	Low	No	Yes	No	No	No	No	Yes	-7.21	2	3	1	1	1	0.17	0	0	3	6.55
DCM66278	OC[C@@H](N1C[C@H](C)[C@@H](OCCCC[C@H](Oc2c(C1=O)cc(cc2)NC(=O)c1ccccc1)C)CN(C(=O)c1ccncc1)C)C	C35H44N4O6	616.75	45	18	0.43	9	7	2	177.18	121.3	3.59	4.01	4.33	1.79	3.63	3.47	-5.89	0.000791	1.28e-06	Moderately soluble	-6.26	0.000339	5.5e-07	Poorly soluble	-8.37	2.63e-06	4.27e-09	Poorly soluble	High	No	Yes	No	No	No	No	Yes	-7.22	1	3	0	0	1	0.55	0	0	3	6.01
DCM66284	O[C@@H](c1cc(CC(=O)NC(c2ccccc2)c2ccccc2)c(=O)n(c1C)Cc1ccc(cc1)C(C)(C)C)N1CCOCC1	C37H43N3O4	593.76	44	24	0.35	11	5	2	178.38	83.8	4.88	4.8	4.24	3.95	6.66	4.91	-6.22	0.000355	5.99e-07	Poorly soluble	-6.29	0.000303	5.11e-07	Poorly soluble	-10.48	1.97e-08	3.32e-11	Insoluble	High	No	Yes	No	Yes	No	Yes	Yes	-6.51	1	3	1	0	0	0.55	0	0	3	5.3
DCM66686	COCCCn1c(C)c(cc(c1=O)CC(=O)NCc1cccc2c1cccc2)[C@H](N(C(C)C)C(C)C)O	C30H41N3O4	507.66	37	16	0.47	13	5	2	149.88	83.8	4.18	3.37	3.84	2.91	5.38	3.94	-4.57	0.0136	2.68e-05	Moderately soluble	-4.81	0.0079	1.56e-05	Moderately soluble	-8.11	3.97e-06	7.82e-09	Poorly soluble	High	No	Yes	No	No	No	Yes	Yes	-7	1	3	1	0	0	0.55	0	1	2	4.56
DCM66689	CCOc1ccc(cc1)CCN1[C@H](Cc2ccccc2)CN(C(=O)C1=O)[C@@H](CN1CCC[C@H]1CN1[C@H](CNC(=O)C1=O)CC(C)C)CC(C)C	C40H57N5O5	687.91	50	12	0.6	16	6	1	215.79	102.5	4.79	6.79	2.26	2.41	5.68	4.39	-7.5	2.15e-05	3.13e-08	Poorly soluble	-8.75	1.22e-06	1.78e-09	Poorly soluble	-9.14	5.02e-07	7.29e-10	Poorly soluble	High	No	Yes	No	No	No	No	Yes	-5.68	1	3	1	0	3	0.55	0	1	3	5.69
DCM68029	CO[C@H](/C(=N\C(=O)N1CCC(CC1)C)/Cc1ccccc1)O	C17H24N2O3	304.38	22	6	0.53	6	4	1	90.7	62.13	3	2.23	2.11	2.32	2.56	2.44	-2.94	0.351	0.00115	Soluble	-3.17	0.206	0.000676	Soluble	-3.31	0.148	0.000485	Soluble	High	Yes	No	No	No	No	No	No	-6.57	0	0	0	0	0	0.55	0	2	0	3.79
DCM6816	C[C@@H](c1ccccc1)NC(=O)[C@@H]1CCCN1C(=O)OCc1ccccc1	C21H24N2O3	352.43	26	12	0.33	8	3	1	103.72	58.64	3.16	3.39	2.81	2.6	2.96	2.98	-3.97	0.0374	0.000106	Soluble	-4.3	0.0176	5.01e-05	Moderately soluble	-5.62	0.000849	2.41e-06	Moderately soluble	High	Yes	No	No	Yes	Yes	Yes	Yes	-6.04	0	0	0	0	0	0.55	0	0	2	3.4
DCM68497	CC(NC(=O)CN1CCC(CC1)(NC(=O)C)c1cccc(c1)F)C	C18H26FN3O2	335.42	24	6	0.56	7	4	2	94.83	61.44	2.82	1.66	1.71	1.73	2.7	2.12	-2.69	0.687	0.00205	Soluble	-2.56	0.915	0.00273	Soluble	-4.98	0.00354	1.06e-05	Moderately soluble	High	Yes	Yes	No	No	No	Yes	No	-7.17	0	0	0	0	0	0.55	0	0	0	2.39
DCM68875	Oc1ccc(cn1)C(=O)NCc1cccc(c1)C(F)(F)F	C14H11F3N2O2	296.24	21	12	0.14	5	6	2	68.75	62.22	2.25	2.49	3.74	2.21	2.97	2.73	-3.34	0.136	0.000459	Soluble	-3.44	0.107	0.000362	Soluble	-5.25	0.00167	5.64e-06	Moderately soluble	High	Yes	No	Yes	No	No	Yes	No	-6.34	0	0	0	0	0	0.55	0	0	0	2.01
DCM69299	CC([C@H](C(=O)NC1CCCCCCC1)NC(=O)c1ccccc1)C	C20H30N2O2	330.46	24	6	0.6	7	2	2	98.01	58.2	3.02	4.8	3.67	2.9	3.5	3.58	-4.64	0.00764	2.31e-05	Moderately soluble	-5.75	0.000582	1.76e-06	Moderately soluble	-5.24	0.00191	5.79e-06	Moderately soluble	High	Yes	No	No	Yes	Yes	Yes	Yes	-4.91	0	0	0	0	0	0.55	0	0	1	2.71
DCM69912	CCOc1ccccc1C(=O)N[C@@H](CCc1ccccc1)C	C19H23NO2	297.39	22	12	0.32	8	2	1	89.65	38.33	3.27	4.78	3.84	3.61	4.35	3.97	-4.57	0.00799	2.69e-05	Moderately soluble	-5.32	0.00144	4.83e-06	Moderately soluble	-6.68	6.17e-05	2.07e-07	Poorly soluble	High	Yes	No	Yes	Yes	Yes	Yes	Yes	-4.72	0	0	0	0	0	0.55	0	0	2	2.54
DCM70226	CCOC(=O)N[C@H]([C@H]1CCCCC1=O)c1ccccc1	C16H21NO3	275.34	20	6	0.5	6	3	1	77.23	55.4	2.69	3.14	2.91	2.1	2.85	2.74	-3.35	0.123	0.000445	Soluble	-3.97	0.0293	0.000106	Soluble	-4.3	0.0137	4.98e-05	Moderately soluble	High	Yes	No	No	No	Yes	No	No	-5.75	0	0	0	0	0	0.55	0	0	0	2.95
DCM70536	Fc1ccc(cc1)[C@@H](N(C(=O)c1cc[nH]n1)CCc1ccccc1)C(=O)NC(C)(C)C	C24H27FN4O2	422.5	31	17	0.29	10	4	2	117.3	78.09	2.9	4.09	3.99	2.88	4.38	3.65	-4.78	0.00698	1.65e-05	Moderately soluble	-5.44	0.00155	3.67e-06	Moderately soluble	-7.8	6.63e-06	1.57e-08	Poorly soluble	High	No	No	No	Yes	Yes	Yes	Yes	-5.97	0	0	0	0	0	0.55	0	0	3	3.4
DCM70561	COc1cc(cc(c1OC)OC)C(=O)N1CCC(CC1)NC(=O)[C@H](Cc1ccc(cc1)C(C)C)NC(=O)C	C29H39N3O6	525.64	38	12	0.48	13	6	2	149.14	106.2	3.76	3.63	2.92	1.66	4.28	3.25	-4.76	0.0091	1.73e-05	Moderately soluble	-5.55	0.00149	2.83e-06	Moderately soluble	-7.2	3.35e-05	6.37e-08	Poorly soluble	High	No	Yes	No	No	No	Yes	Yes	-6.93	1	3	1	0	0	0.55	0	0	3	4.35
DCM70655	CC(NC(=O)CCNC(=O)c1ccc(cc1)F)C	C13H17FN2O2	252.28	18	6	0.38	7	3	2	66.43	58.2	2.34	1.35	1.89	1.98	2.27	1.97	-2.04	2.3	0.00913	Soluble	-2.17	1.69	0.00669	Soluble	-4.32	0.0122	4.84e-05	Moderately soluble	High	Yes	No	No	No	No	No	No	-6.88	0	0	0	0	0	0.55	0	0	0	1.69
DCM70935	O=C(Cc1cn(c2c1cccc2)C)NCc1ccc(cc1)F	C18H17FN2O	296.34	22	15	0.17	5	2	1	85.23	34.03	2.57	2.81	3.44	2.95	3.78	3.11	-3.62	0.0707	0.000239	Soluble	-3.18	0.195	0.000658	Soluble	-6.44	0.000107	3.61e-07	Poorly soluble	High	Yes	No	Yes	Yes	No	Yes	Yes	-6.11	0	0	0	0	0	0.55	0	0	0	2.12
DCM71454	O=C(CN1C(=O)N[C@](C1=O)(C)C1CC1)N[C@H](c1ccc(cc1)F)C	C17H20FN3O3	333.36	24	6	0.47	6	4	2	92.56	78.51	2.52	1.45	0.99	1.41	2.21	1.72	-2.61	0.82	0.00246	Soluble	-2.7	0.658	0.00197	Soluble	-4.46	0.0116	3.47e-05	Moderately soluble	High	No	Yes	No	No	No	No	No	-7.3	0	0	0	0	0	0.55	0	1	0	3.05
DCM71501	CCn1c2ccc(cc2[nH]c(=O)c1=O)C(=O)NCc1ccc(cc1)F	C18H16FN3O3	341.34	25	16	0.17	5	4	2	92.34	83.96	2.16	1.87	2.05	2.44	3.45	2.39	-3.28	0.18	0.000527	Soluble	-3.25	0.19	0.000556	Soluble	-6.28	0.00018	5.28e-07	Poorly soluble	High	No	No	No	No	No	No	No	-7.05	0	0	0	0	0	0.55	0	1	0	2.44
DCM71689	NC(=O)N[C@@H](C(=O)NCCCSc1ccccc1)Cc1ccccc1	C19H23N3O2S	357.47	25	12	0.26	11	2	3	100.59	109.52	2.71	2.87	2.56	2.81	2.72	2.74	-3.49	0.115	0.000321	Soluble	-4.83	0.0053	1.48e-05	Moderately soluble	-6.29	0.000183	5.13e-07	Poorly soluble	High	No	Yes	No	Yes	Yes	Yes	No	-6.44	0	0	1	0	0	0.55	0	0	2	3.15
DCM71724	CO[C@H](/C(=N\C(=O)CSc1nc(N)cc(n1)O)/c1ccccc1)O	C15H16N4O4S	348.38	24	12	0.2	7	7	3	90.03	156.22	1.88	1.48	0.85	-0.01	1.3	1.1	-2.84	0.503	0.00144	Soluble	-4.37	0.0149	4.29e-05	Moderately soluble	-3.36	0.153	0.000441	Soluble	Low	No	Yes	No	No	No	No	No	-7.37	0	0	1	1	1	0.55	0	2	0	3.62
DCM72086	O[C@@H](/C(=N\C(=O)c1ccccc1)/Cc1ccccc1)/N=C\[C@@H]1CCCO1	C21H22N2O3	350.41	26	12	0.29	7	5	1	102.28	71.25	2.55	2.93	3.08	2.79	4.67	3.2	-3.74	0.0641	0.000183	Soluble	-4.09	0.0286	8.17e-05	Moderately soluble	-5.51	0.00109	3.11e-06	Moderately soluble	High	Yes	No	Yes	No	Yes	No	No	-6.36	0	0	0	0	0	0.55	0	1	1	4.31
DCM72282	Fc1ccc(cc1)CNC(=O)C1CCN(CC1)C(=O)Nc1ccc(cc1)F	C20H21F2N3O2	373.4	27	12	0.3	7	4	2	102.09	61.44	3.09	2.58	3.64	3.4	3.12	3.17	-3.65	0.0841	0.000225	Soluble	-3.52	0.113	0.000303	Soluble	-6.32	0.00018	4.83e-07	Poorly soluble	High	Yes	Yes	No	Yes	No	Yes	Yes	-6.75	0	0	0	0	0	0.55	0	0	1	2.81
DCM72464	COc1ccccc1CNC(=O)[C@@H](C(C)C)NC(=O)c1ccccc1C	C21H26N2O3	354.44	26	12	0.33	9	3	2	102.42	67.43	2.89	3.74	2.92	2.71	3.9	3.23	-4.14	0.0256	7.22e-05	Moderately soluble	-4.85	0.00503	1.42e-05	Moderately soluble	-6.66	7.68e-05	2.17e-07	Poorly soluble	High	Yes	Yes	No	Yes	No	Yes	Yes	-5.81	0	0	0	0	0	0.55	0	0	3	2.76
DCM73029	CCO[C@H](/C(=N\[C@H](C(=O)N1[C@@H]2CCC[C@@H]2C[C@H]1C(=O)O)C)/CCc1ccccc1)O	C23H32N2O5	416.51	30	6	0.61	10	6	2	118.81	99.43	3.29	3.05	2.28	1.57	3.05	2.65	-3.83	0.0613	0.000147	Soluble	-4.8	0.00654	1.57e-05	Moderately soluble	-3.56	0.116	0.000278	Soluble	High	No	Yes	No	No	No	Yes	Yes	-6.68	0	0	0	0	0	0.56	0	2	2	4.79
DCM73077	CC(C[C@H](C(=O)N[C@H](c1ccccc1)C)NC(=O)C1CCCCC1)C	C21H32N2O2	344.49	25	6	0.62	9	2	2	102.6	58.2	3.68	4.59	3.65	2.85	4.02	3.76	-4.45	0.0122	3.54e-05	Moderately soluble	-5.54	0.001	2.91e-06	Moderately soluble	-5.51	0.00106	3.08e-06	Moderately soluble	High	Yes	No	No	No	Yes	Yes	Yes	-5.14	0	0	0	0	0	0.55	0	0	2	3.15
DCM73597	CSCC/C(=N\C(=O)OC(C)(C)C)/[C@@H](N1CCC(CC1)C(=O)N[C@@H](C(=O)NCc1ccccc1OC)C)O	C27H42N4O6S	550.71	38	6	0.63	16	8	3	154.08	154.86	5.21	2.48	2.44	1.47	3.56	3.03	-3.88	0.073	0.000133	Soluble	-5.38	0.00231	4.2e-06	Moderately soluble	-5.4	0.00221	4.02e-06	Moderately soluble	Low	No	Yes	No	No	No	No	Yes	-7.9	1	3	2	1	2	0.55	0	1	2	5.41
DCM73598	CC(C/C(=N\C(=O)OC(C)(C)C)/[C@@H](N1CCC(CC1)C(=O)N[C@H](C(=O)O)Cc1c[nH]c2c1cccc2)O)C	C28H40N4O6	528.64	38	9	0.57	13	8	4	150.63	144.32	3.5	1.38	3.35	1.92	3.9	2.81	-3.3	0.262	0.000496	Soluble	-4.01	0.0512	9.68e-05	Moderately soluble	-5.09	0.00433	8.18e-06	Moderately soluble	Low	No	Yes	No	No	No	No	No	-8.54	1	3	2	1	0	0.55	0	1	2	5.28
DCM73601	COc1ccccc1CNC(=O)[C@H](NC(=O)C1CCN(CC1)[C@@H](C(=N)Cc1ccccc1)O)C	C26H34N4O4	466.57	34	12	0.42	12	6	4	135.52	114.75	3.53	2.13	1.58	1.04	3.08	2.27	-3.54	0.133	0.000286	Soluble	-4.17	0.0315	6.74e-05	Moderately soluble	-6.21	0.00029	6.21e-07	Poorly soluble	High	No	Yes	No	No	No	Yes	No	-7.63	0	1	1	0	0	0.55	0	1	2	4.21
DCM73602	O=C(OC(C)(C)C)N[C@H](C(=O)NC[C@@H]1CC[C@H](CC1)C(=O)N[C@@H](C(=O)O)Cc1ccccc1)C	C25H37N3O6	475.58	34	6	0.6	14	6	4	128.11	133.83	3.39	3	2.63	1.57	2.55	2.63	-3.89	0.062	0.00013	Soluble	-5.47	0.00159	3.35e-06	Moderately soluble	-5.07	0.00403	8.47e-06	Moderately soluble	High	No	Yes	No	No	No	No	Yes	-7.07	0	1	1	1	0	0.56	0	0	2	4.54
DCM73603	O=C(OC(C)(C)C)N[C@@H](C(=O)NC[C@@H]1CC[C@@H](CC1)C(=O)N[C@H](C(=O)O)C(C)C)Cc1ccccc1	C27H41N3O6	503.63	36	6	0.63	15	6	4	137.72	133.83	3.31	3.62	3.27	1.97	3.21	3.08	-4.38	0.0212	4.2e-05	Moderately soluble	-6.12	0.000384	7.62e-07	Poorly soluble	-5.48	0.00168	3.34e-06	Moderately soluble	Low	No	Yes	No	No	No	No	Yes	-6.8	1	3	1	1	0	0.56	0	0	3	4.82
DCM73651	CO[C@H]1[C@H](O)[C@@H](O)[C@@H](OC1(C)C)Oc1ccc(c(c1)C(=O)NCCCc1ccccc1)c1ccc(cc1)c1ccccc1	C36H39NO6	581.7	43	24	0.31	11	6	3	166.97	97.25	4.34	5.83	5.63	3.3	6.02	5.03	-6.81	9.08e-05	1.56e-07	Poorly soluble	-7.64	1.32e-05	2.27e-08	Poorly soluble	-10.57	1.56e-08	2.68e-11	Insoluble	High	No	Yes	Yes	Yes	No	No	Yes	-5.71	1	4	1	0	1	0.55	0	0	3	5.5
DCM7382	C[C@@H](NC(=O)C1CCC1)CCc1ccccc1	C15H21NO	231.33	17	6	0.53	6	1	1	70.75	29.1	2.77	3.28	2.92	2.85	3.49	3.06	-3.21	0.144	0.000623	Soluble	-3.57	0.0628	0.000272	Soluble	-4.53	0.00686	2.96e-05	Moderately soluble	High	Yes	No	No	No	No	Yes	No	-5.38	0	0	0	0	0	0.55	0	0	1	1.97
DCM74127	CC[C@@H](NC(=O)c1[nH]cc(c1)S(=O)(=O)N1CCCCC1)Cc1ccccc1	C20H27N3O3S	389.51	27	11	0.45	8	4	2	109.72	90.65	2.52	3.23	3.64	1.65	2.88	2.79	-4.06	0.0337	8.64e-05	Moderately soluble	-4.81	0.00608	1.56e-05	Moderately soluble	-5.95	0.000436	1.12e-06	Moderately soluble	High	No	Yes	No	Yes	Yes	Yes	Yes	-6.38	0	0	0	0	0	0.55	0	0	2	3.6
DCM74673	CCCN([C@H](c1cn(c(c1)O)Cc1ccccc1)O)CC(=O)Nc1ccccc1C	C24H29N3O3	407.51	30	17	0.29	10	4	3	119.26	77.73	2.3	3.68	3.38	2.71	3.03	3.02	-4.44	0.0147	3.6e-05	Moderately soluble	-5	0.00405	9.95e-06	Moderately soluble	-6.36	0.000177	4.36e-07	Poorly soluble	High	Yes	Yes	No	Yes	No	Yes	Yes	-6.17	0	0	0	0	0	0.55	0	1	3	3.6
DCM75073	OC/C(=N\C(=O)/C=C\1/CCCCCC(=O)OC[C@@H](N[C@H]1O)C(C)(C)C)/Cc1ccccc1	C25H36N2O5	444.56	32	6	0.56	6	7	3	129.3	108.22	3.7	2.94	2.56	2.32	4	3.1	-4.19	0.0286	6.44e-05	Moderately soluble	-4.87	0.00593	1.33e-05	Moderately soluble	-5.22	0.00266	5.98e-06	Moderately soluble	High	No	Yes	No	No	No	No	No	-6.92	0	0	0	0	0	0.55	0	2	1	5.31
DCM75077	OC/C(=N\C(=O)/C=C/1\CCCC/C(=C/C(=O)OC(C)(C)C)/[C@H](OC[C@H](N[C@@H]1O)C(C)(C)C)O)/Cc1ccccc1	C31H46N2O7	558.71	40	6	0.58	9	9	4	159.95	137.68	4.64	3.07	3.23	2.26	4.49	3.54	-4.76	0.00982	1.76e-05	Moderately soluble	-5.63	0.00132	2.35e-06	Moderately soluble	-5.33	0.00262	4.69e-06	Moderately soluble	Low	No	Yes	No	No	No	No	Yes	-7.53	1	3	0	1	0	0.55	0	2	2	6.45
DCM75078	OC/C(=N\C(=O)/C=C/1\CCCCC[C@@H](C(=O)OC[C@@H](N[C@H]1O)C)Cc1ccc(cc1)F)/Cc1ccccc1	C30H37FN2O5	524.62	38	12	0.43	7	8	3	149.19	108.22	3.77	4.21	3.96	3.45	5.37	4.15	-5.52	0.0016	3.04e-06	Moderately soluble	-6.19	0.000337	6.42e-07	Poorly soluble	-7.56	1.44e-05	2.74e-08	Poorly soluble	High	No	Yes	No	No	No	No	Yes	-6.51	1	3	0	0	0	0.55	0	2	2	5.78
DCM75080	OC/C(=N\C(=O)/C=C/1\CCCCC[C@H](C(=O)OC[C@H]2N([C@H]1O)CCC2)Cc1ccc(cc1)F)/Cc1ccccc1	C32H39FN2O5	550.66	40	12	0.47	7	8	2	156.79	99.43	4.36	4.8	4.44	3.82	5.39	4.56	-6.04	0.000504	9.16e-07	Poorly soluble	-6.62	0.000132	2.4e-07	Poorly soluble	-7.26	3.05e-05	5.53e-08	Poorly soluble	High	No	Yes	No	No	No	No	Yes	-6.25	1	3	0	0	0	0.55	0	2	2	6.1
DCM75087	OC/C(=N\C(=O)/C=C/1\CCCC/C(=C/C(=O)OC(C)(C)C)/[C@@H](OCCN[C@H]1O)O)/Cc1ccccc1	C27H38N2O7	502.6	36	6	0.52	8	9	4	140.98	137.68	4.21	1.28	1.82	1.49	3.44	2.45	-3.36	0.22	0.000439	Soluble	-3.77	0.0852	0.00017	Soluble	-4.42	0.0192	3.83e-05	Moderately soluble	High	No	Yes	No	No	No	No	No	-8.46	1	3	0	1	0	0.55	0	2	2	5.73
DCM751	CC[C@@H]([C@H](C(=O)O)NC(=O)C1CCN(CC1)[C@H](/C(=N\C(=O)OC(C)(C)C)/Cc1ccccc1)O)C	C26H39N3O6	489.6	35	6	0.62	13	8	3	138.77	128.53	3.77	1.32	2.87	2.18	3.33	2.69	-2.98	0.517	0.00106	Soluble	-3.62	0.117	0.00024	Soluble	-4.25	0.0278	5.68e-05	Moderately soluble	High	No	Yes	No	No	No	No	No	-8.35	0	3	1	0	0	0.55	0	1	2	5.33
DCM75105	OC[C@H](N1C[C@@H](C)[C@H](CN(C(=O)Nc2ccc3c(c2)OCO3)C)Oc2c(C1=O)cc(cc2)NC(=O)C1CCCCC1)C	C31H40N4O7	580.67	42	12	0.52	10	7	3	162.05	129.67	3.96	3.69	3.56	2	2.48	3.14	-5.32	0.0028	4.83e-06	Moderately soluble	-6.1	0.000458	7.88e-07	Poorly soluble	-6.22	0.000347	5.98e-07	Poorly soluble	High	No	Yes	No	No	No	No	Yes	-7.22	2	3	0	0	0	0.17	0	0	3	5.38
DCM75109	OC[C@@H](N1C[C@@H](C)[C@H](CN(C(=O)Nc2ccc3c(c2)OCO3)C)Oc2c(CC1=O)cc(cc2)NC(=O)Nc1ccccc1)C	C32H37N5O7	603.67	44	18	0.34	11	7	4	169.12	141.7	3.4	2.93	3.42	2.29	1.84	2.78	-5.01	0.00596	9.88e-06	Moderately soluble	-5.57	0.00163	2.71e-06	Moderately soluble	-7.6	1.5e-05	2.49e-08	Poorly soluble	Low	No	Yes	No	No	No	Yes	Yes	-7.9	2	3	2	1	1	0.17	0	0	2	5.85
DCM75112	OC[C@@H](N1C[C@@H](C)[C@@H](CN(C(=O)NC(C)C)C)Oc2c(C1=O)cccc2NC(=O)C1CCOCC1)C	C26H40N4O6	504.62	36	6	0.65	10	6	3	140.66	120.44	3.69	1.35	1.75	1.07	1.57	1.89	-3.28	0.263	0.000522	Soluble	-3.48	0.167	0.00033	Soluble	-4.33	0.0235	4.67e-05	Moderately soluble	High	No	Yes	No	No	No	No	No	-8.42	1	3	0	0	0	0.55	0	0	2	4.99
DCM75113	OC[C@@H](N1C[C@@H](C)[C@@H](CN(C(=O)NC2CCCCC2)C)Oc2c(C1=O)cccc2NC(=O)c1ccncc1)C	C29H39N5O5	537.65	39	12	0.52	10	6	3	152.47	124.1	3.64	2.64	2.96	1.7	2.06	2.6	-4.4	0.0212	3.94e-05	Moderately soluble	-4.9	0.00682	1.27e-05	Moderately soluble	-6.15	0.000379	7.05e-07	Poorly soluble	High	No	Yes	No	No	No	Yes	Yes	-7.71	1	3	0	0	0	0.55	0	0	2	5.03
DCM75118	OC[C@@H](N1C[C@H](C)[C@@H](CN(C(=O)Nc2ccc(cc2)OC)C)Oc2c(C1=O)cc(cc2)NC(=O)Cc1ccccc1)C	C32H38N4O6	574.67	42	18	0.34	12	6	3	165.05	120.44	3.65	3.36	3.5	2.32	3.04	3.17	-5.04	0.00518	9.02e-06	Moderately soluble	-5.57	0.00156	2.71e-06	Moderately soluble	-8.09	4.66e-06	8.11e-09	Poorly soluble	High	No	Yes	No	No	No	Yes	Yes	-7.42	1	3	1	0	0	0.55	0	0	2	5.04
DCM75119	OC[C@@H](N1C[C@H](C)[C@@H](CN(Cc2ccccc2)C)Oc2c(C1=O)cccc2NC(=O)c1ccncc1)C	C29H34N4O4	502.6	37	18	0.34	9	6	2	146.84	95	3.29	3.03	2.96	1.89	3.18	2.87	-4.63	0.0118	2.34e-05	Moderately soluble	-4.69	0.0103	2.04e-05	Moderately soluble	-7.68	1.05e-05	2.1e-08	Poorly soluble	High	No	Yes	No	Yes	No	Yes	Yes	-7.21	1	3	0	0	0	0.55	0	0	2	4.66
DCM75124	OC[C@H](N1C[C@@H](C)[C@H](CN(Cc2ccc(cc2)c2ccccc2)C)Oc2c(C1=O)cc(cc2)NC(=O)Cn1cnnn1)C	C32H37N7O4	583.68	43	23	0.34	11	8	2	166.73	125.71	3.33	3.54	2.61	2.54	2.47	2.9	-5.36	0.00255	4.38e-06	Moderately soluble	-5.86	0.000797	1.37e-06	Moderately soluble	-8.14	4.23e-06	7.24e-09	Poorly soluble	High	No	Yes	No	No	Yes	Yes	Yes	-7.35	2	3	1	0	0	0.17	0	0	3	5.1
DCM752	CSCC/C(=N/C(=O)[C@@H](n1c(=O)[nH]c2c(c1=O)cccc2)Cc1ccccc1)/[C@@H](N1CCC[C@H]1C(=O)O)O	C27H30N4O6S	538.62	38	16	0.37	11	8	3	151.37	170.36	2.82	0.37	1.68	2.07	3.56	2.1	-3	0.541	0.001	Soluble	-3.51	0.165	0.000307	Soluble	-5.47	0.0018	3.35e-06	Moderately soluble	Low	No	Yes	No	No	No	No	Yes	-9.32	1	2	2	1	1	0.55	0	1	2	5.16
DCM75244	N#Cc1ccc(cc1)C(=O)N([C@H]1C[C@@H]2N(C(=O)[C@@H]1[C@H](O)C)CCc1c2cc(cc1)Oc1ccccc1C)C	C31H31N3O4	509.6	38	18	0.32	6	5	1	147.58	93.87	3.52	4.52	3.92	2.72	4.05	3.75	-5.8	0.000805	1.58e-06	Moderately soluble	-6.21	0.000312	6.13e-07	Poorly soluble	-7.46	1.76e-05	3.45e-08	Poorly soluble	High	No	Yes	No	Yes	Yes	Yes	Yes	-6.2	1	2	0	0	0	0.55	0	0	2	4.73
DCM75304	CCCCCCN1C[C@@H]([C@H](C[C@H]1c1ccc(cc1)OC)O)n1nnc(c1)COC(=O)c1ccccc1	C28H36N4O4	492.61	36	17	0.46	12	7	1	141.96	89.71	4.92	4.42	3.72	2.89	3.63	3.91	-5.24	0.00286	5.8e-06	Moderately soluble	-6.02	0.000469	9.51e-07	Poorly soluble	-6.99	5.02e-05	1.02e-07	Poorly soluble	High	No	Yes	No	Yes	Yes	Yes	Yes	-6.17	0	3	1	0	0	0.55	0	0	3	4.88
DCM75329	O[C@H]1C[C@@H](c2ccc(cc2)C)N(C[C@@H]1n1nnc(c1)COC(=O)c1ccccc1)C(=O)C1CCCCC1	C29H34N4O4	502.6	37	17	0.45	8	6	1	143.33	97.55	4.08	4.02	3.54	3.15	3.15	3.59	-5.3	0.00251	5e-06	Moderately soluble	-5.77	0.000851	1.69e-06	Moderately soluble	-6.21	0.000307	6.11e-07	Poorly soluble	High	No	Yes	No	No	Yes	Yes	Yes	-6.51	1	3	0	0	0	0.55	0	0	3	4.87
DCM75354	CCOC(=O)CCCCCC(=O)Nc1ccc2c(c1)C(=O)N(C[C@H](C)[C@@H](OCCCC[C@H](O2)C)CN(C(=O)NC(C)C)C)[C@H](CO)C	C35H58N4O8	662.86	47	6	0.71	17	8	3	187.32	146.74	4.73	3.77	4.41	2	4.05	3.79	-5.3	0.00334	5.04e-06	Moderately soluble	-6.54	0.000189	2.85e-07	Poorly soluble	-7.02	6.27e-05	9.46e-08	Poorly soluble	Low	No	Yes	No	No	No	No	Yes	-7.67	2	3	2	1	2	0.17	0	0	3	6.72
DCM75355	CCOC(=O)CCCCCC(=O)Nc1ccc2c(c1)C(=O)N(C[C@@H](C)[C@@H](OCCCC[C@@H](O2)C)CN(C(=O)c1ccccc1)C)[C@@H](CO)C	C38H55N3O8	681.86	49	12	0.58	16	8	2	194.42	134.71	4.98	4.8	5.13	2.52	5.2	4.53	-6.22	0.000414	6.07e-07	Poorly soluble	-7.36	2.97e-05	4.35e-08	Poorly soluble	-8.64	1.57e-06	2.3e-09	Poorly soluble	Low	No	Yes	No	No	No	No	Yes	-7.05	2	3	1	1	2	0.17	0	0	3	6.61
DCM75362	O=C(Cc1cc([C@H](N(C)C)O)c(n(c1=O)Cc1ccc(cc1)F)C)NCCCCc1ccccc1	C28H34FN3O3	479.59	35	18	0.36	12	5	2	136.5	74.57	4.32	3.09	3.67	3.65	5.38	4.02	-4.35	0.0215	4.48e-05	Moderately soluble	-4.32	0.0228	4.75e-05	Moderately soluble	-8.66	1.04e-06	2.16e-09	Poorly soluble	High	Yes	Yes	No	No	No	Yes	Yes	-7.03	0	1	1	0	0	0.55	0	1	2	4.22
DCM75377	CCCCn1c(C)c(cc(c1=O)CC(=O)NC(c1ccccc1)c1ccccc1)[C@H](N(C(C)C)C(C)C)O	C32H43N3O3	517.7	38	18	0.44	13	4	2	155.77	74.57	4.82	4.86	4.87	4.05	6.1	4.94	-5.6	0.00129	2.49e-06	Moderately soluble	-6.16	0.000358	6.91e-07	Poorly soluble	-8.84	7.48e-07	1.45e-09	Poorly soluble	High	No	Yes	No	Yes	No	Yes	Yes	-6.01	1	3	1	0	0	0.55	0	1	3	4.94
DCM75385	CCN([C@H](c1cc(CC(=O)NCc2cccc3c2cccc3)c(=O)n(c1C)Cc1ccccc1)O)CC	C31H35N3O3	497.63	37	22	0.29	11	4	2	149.24	74.57	4.4	3.79	4.07	3.69	5.6	4.31	-5.03	0.00468	9.4e-06	Moderately soluble	-5.05	0.00443	8.91e-06	Moderately soluble	-9.64	1.15e-07	2.31e-10	Poorly soluble	High	Yes	Yes	No	Yes	Yes	Yes	Yes	-6.64	0	3	1	0	0	0.55	0	1	3	4.34
DCM754	CC([C@H](C(=O)O)NC(=O)C1CCN(CC1)[C@H](/C(=N\C(=O)OC(C)(C)C)/Cc1ccccc1)O)C	C25H37N3O6	475.58	34	6	0.6	12	8	3	133.96	128.53	3.24	0.96	2.48	1.97	2.91	2.31	-2.73	0.882	0.00185	Soluble	-3.25	0.27	0.000567	Soluble	-3.86	0.0661	0.000139	Soluble	High	No	Yes	No	No	No	No	No	-8.52	0	2	1	0	0	0.55	0	1	2	5.09
DCM75501	Fc1ccc(cc1)CN1C(=O)S[C@@H](C1=C)C(=O)NCc1cccc(c1)C(F)(F)F	C20H16F4N2O2S	424.41	29	12	0.2	7	6	1	105.1	74.71	3.16	4.26	5.6	3.7	4.77	4.3	-5	0.00425	1e-05	Moderately soluble	-5.54	0.00122	2.88e-06	Moderately soluble	-7.11	3.28e-05	7.73e-08	Poorly soluble	High	No	No	No	Yes	Yes	No	Yes	-5.86	0	0	0	0	0	0.55	0	1	2	3.83
DCM75726	O=C(Cc1cc([C@H](N(C(C)C)C(C)C)O)c(n(c1=O)Cc1ccc(cc1)C(C)(C)C)C)NCCc1ccccn1	C33H46N4O3	546.74	40	18	0.48	13	5	2	163.22	87.46	4.73	4.51	4.58	3.44	6.33	4.72	-5.55	0.00155	2.84e-06	Moderately soluble	-6.07	0.000468	8.55e-07	Poorly soluble	-9.21	3.39e-07	6.21e-10	Poorly soluble	High	No	Yes	No	No	No	Yes	Yes	-6.43	1	3	1	0	0	0.55	0	1	3	4.96
DCM75729	CC(C[C@H](N1C[C@H](Cc2ccccc2)N(C(=O)C1=O)CCc1ccccc1)CN1CCC[C@@H]1CN1[C@H](CNC(=O)C1=O)CC(C)C)C	C38H53N5O4	643.86	47	12	0.58	14	5	1	204.49	93.27	3.97	6.45	1.86	2.57	5.16	4	-7.16	4.45e-05	6.91e-08	Poorly soluble	-8.2	4.03e-06	6.27e-09	Poorly soluble	-8.67	1.38e-06	2.15e-09	Poorly soluble	High	No	Yes	No	No	No	No	Yes	-5.65	1	3	1	0	2	0.55	0	1	3	5.36
DCM7637	COc1ccc(cc1)S(=O)(=O)N1CCN(CC1)CC(=O)/N=C(\[C@@H](O)C)/Cc1ccccc1	C23H29N3O5S	459.56	32	12	0.39	9	8	1	130.33	107.89	3.84	2.01	1.91	1.02	2.35	2.23	-3.64	0.106	0.00023	Soluble	-3.9	0.0575	0.000125	Soluble	-5.33	0.00216	4.71e-06	Moderately soluble	High	No	Yes	No	No	Yes	No	Yes	-7.68	0	1	0	0	0	0.55	0	1	2	4.16
DCM76522	CCCc1cc(O)n2c(n1)nc(n2)NCc1ccccc1Cl	C15H16ClN5O	317.77	22	15	0.27	5	4	2	86.19	75.34	2.72	3.7	2.71	2.77	2.28	2.84	-4.32	0.0154	4.83e-05	Moderately soluble	-4.97	0.00338	1.06e-05	Moderately soluble	-5.53	0.000931	2.93e-06	Moderately soluble	High	Yes	No	Yes	Yes	Yes	No	No	-5.61	0	0	0	0	0	0.55	0	0	1	2.86
DCM7692	CSc1ncccc1C(=O)N[C@@H](CCc1ccccc1)C	C17H20N2OS	300.42	21	12	0.29	7	2	1	87.86	67.29	3.17	3.72	3.55	2.75	3.96	3.43	-4.01	0.0296	9.84e-05	Moderately soluble	-4.82	0.0045	1.5e-05	Moderately soluble	-6.27	0.00016	5.32e-07	Poorly soluble	High	Yes	No	Yes	Yes	Yes	Yes	Yes	-5.49	0	0	0	0	0	0.55	0	0	1	2.63
DCM77611	O=C(CN1CCC(CC1)NC(=O)c1ccccc1C)NCc1ccc(cc1)F	C22H26FN3O2	383.46	28	12	0.36	8	4	2	110.2	61.44	2.93	3.1	2.53	2.65	3.61	2.96	-3.96	0.0421	0.00011	Soluble	-4.06	0.0335	8.74e-05	Moderately soluble	-6.82	5.79e-05	1.51e-07	Poorly soluble	High	Yes	Yes	No	No	No	Yes	Yes	-6.44	0	0	0	0	0	0.55	0	0	2	2.92
DCM77937	COc1ccc(cc1)CCNC(=O)c1cc(O)nc2c1cccc2	C19H18N2O3	322.36	24	16	0.16	6	4	2	92.55	71.45	2.81	3.98	2.92	2.29	3.4	3.08	-4.44	0.0116	3.6e-05	Moderately soluble	-5.18	0.00212	6.58e-06	Moderately soluble	-6.56	8.92e-05	2.77e-07	Poorly soluble	High	Yes	No	Yes	Yes	Yes	Yes	Yes	-5.44	0	0	0	0	0	0.55	0	0	1	2.11
DCM78359	O=C(NCc1ccc(cc1)F)COC(=O)c1cc(O)nc2c1cccc2	C19H15FN2O4	354.33	26	16	0.11	7	6	2	92.11	88.52	2.68	2.96	2.82	2.33	3.23	2.81	-3.9	0.0451	0.000127	Soluble	-4.48	0.0117	3.3e-05	Moderately soluble	-6.38	0.000148	4.18e-07	Poorly soluble	High	No	No	Yes	No	Yes	Yes	No	-6.36	0	0	0	0	0	0.55	0	0	1	2.41
DCM78683	O=C(Nc1ccc(cc1F)Cl)CN1C(=O)NC2(C1=O)CCCC2	C15H15ClFN3O3	339.75	23	6	0.4	4	4	2	89.5	78.51	2.5	1.83	1.75	1.7	2.17	1.99	-3.03	0.318	0.000937	Soluble	-3.1	0.271	0.000796	Soluble	-4.76	0.00592	1.74e-05	Moderately soluble	High	No	Yes	Yes	No	No	No	No	-7.07	0	0	0	0	0	0.55	0	1	0	2.88
DCM78789	O=C(N[C@H](c1ccccc1)C)COc1cc(C)cc(c1)C	C18H21NO2	283.36	21	12	0.28	6	2	1	84.78	38.33	2.86	3.86	3.24	3.11	4.09	3.43	-4.06	0.0249	8.8e-05	Moderately soluble	-4.36	0.0123	4.35e-05	Moderately soluble	-6.27	0.000154	5.42e-07	Poorly soluble	High	Yes	No	Yes	Yes	No	Yes	Yes	-5.29	0	0	0	0	0	0.55	0	0	1	2.41
DCM79046	CCOC(=O)C(=O)N[C@@H](CCc1ccccc1)C	C14H19NO3	249.31	18	6	0.43	8	3	1	69.34	55.4	2.3	2.94	1.69	1.98	2.54	2.29	-2.96	0.276	0.00111	Soluble	-3.77	0.0428	0.000172	Soluble	-4.13	0.0185	7.41e-05	Moderately soluble	High	Yes	No	Yes	No	No	No	No	-5.73	0	0	0	0	0	0.55	0	1	2	2.19
DCM79611	O=C(c1ccco1)/N=C/[C@H](N([C@@H](c1cccnc1)C(=O)NC1CCCCC1)c1ccccc1C)O	C27H30N4O4	474.55	35	17	0.33	10	6	2	134.07	108.03	3.74	4.29	3.88	1.73	3.88	3.5	-5.18	0.0031	6.54e-06	Moderately soluble	-6.27	0.000254	5.35e-07	Poorly soluble	-6.85	6.75e-05	1.42e-07	Poorly soluble	High	No	Yes	No	Yes	Yes	Yes	Yes	-6.15	0	1	0	0	0	0.55	0	2	3	4.74
DCM79733	COc1cccc(c1OC)C[C@H](C(=O)NC1CCN(CC1)C(=O)c1ccc(cc1)Cl)NC(=O)C	C25H30ClN3O5	487.98	34	12	0.4	11	5	2	133.08	96.97	3.68	3.16	2.44	1.84	3.65	2.96	-4.39	0.0198	4.06e-05	Moderately soluble	-4.87	0.00663	1.36e-05	Moderately soluble	-6.91	6.07e-05	1.24e-07	Poorly soluble	High	No	Yes	No	Yes	Yes	Yes	Yes	-7.03	0	2	1	0	0	0.55	0	0	2	3.9
DCM7989	O=C(N[C@H](c1ccccc1)C)Cn1cc2c(n1)CCCCC2	C18H23N3O	297.39	22	11	0.44	5	2	1	87.64	46.92	2.57	3.34	2.71	2.45	3.1	2.83	-3.83	0.0442	0.000149	Soluble	-4	0.0296	9.94e-05	Moderately soluble	-5.15	0.00212	7.14e-06	Moderately soluble	High	Yes	Yes	No	Yes	No	Yes	No	-5.74	0	0	0	0	0	0.55	0	0	0	3.38
DCM79916	OC[C@H](Cn1c2C[C@@H]3[C@@H](c2cc1C(=O)N(C)C)[C@@](N(C3)C(=O)c1ccccc1)(Cc1ccc(cc1)OC)C(=O)OC)O	C32H37N3O7	575.65	42	17	0.41	12	7	2	158.9	121.54	3.55	2.1	1.74	1.42	3.01	2.36	-4.24	0.0332	5.76e-05	Moderately soluble	-4.28	0.03	5.22e-05	Moderately soluble	-6.12	0.00044	7.64e-07	Poorly soluble	High	No	Yes	No	No	No	Yes	Yes	-8.32	1	3	1	0	0	0.55	0	0	2	5.44
DCM79946	O=C(c1ccc2c(c1)[nH]c(=S)n(c2=O)C[C@@H]1CCCO1)NCc1ccccc1	C21H21N3O3S	395.47	28	16	0.29	6	3	2	110.34	108.21	3.04	2.41	3.02	2.33	4.77	3.11	-3.84	0.0575	0.000146	Soluble	-4.32	0.0187	4.74e-05	Moderately soluble	-6.39	0.00016	4.06e-07	Poorly soluble	High	No	Yes	Yes	Yes	Yes	No	Yes	-7	0	0	0	0	0	0.55	0	1	1	3.49
DCM80103	O=C(c1ccc2c(c1)[nH]c(=S)n(c2=O)C[C@@H]1CCCO1)NCc1ccccc1Cl	C21H20ClN3O3S	429.92	29	16	0.29	6	3	2	115.35	108.21	3.3	3.03	3.67	2.82	5.41	3.65	-4.43	0.0161	3.74e-05	Moderately soluble	-4.97	0.00463	1.08e-05	Moderately soluble	-6.98	4.53e-05	1.05e-07	Poorly soluble	High	No	Yes	Yes	Yes	Yes	No	Yes	-6.77	0	0	0	0	0	0.55	0	1	1	3.54
DCM80222	O[C@H]1C[C@@H](N(C1)C(=O)Oc1ccccc1)C(=O)Nc1cccc(c1)C	C19H20N2O4	340.37	25	12	0.26	6	4	2	97.41	78.87	2.67	2.5	2	1.87	1.59	2.12	-3.48	0.112	0.000328	Soluble	-3.8	0.0537	0.000158	Soluble	-4.37	0.0146	4.3e-05	Moderately soluble	High	No	Yes	No	No	No	Yes	No	-6.6	0	0	0	0	0	0.55	0	0	0	3.42
DCM80608	CN(Cc1cccc(c1)Cl)CC(=O)NCc1ccc(cc1)F	C17H18ClFN2O	320.79	22	12	0.24	7	3	1	85.99	32.34	3.19	3.33	3.34	3.5	3.92	3.46	-3.87	0.0434	0.000135	Soluble	-3.69	0.0661	0.000206	Soluble	-6.73	6.03e-05	1.88e-07	Poorly soluble	High	Yes	No	Yes	Yes	No	Yes	Yes	-5.89	0	0	0	0	0	0.55	0	0	0	2.02
DCM80677	O=C(N[C@H](c1ccccc1)C)CSc1scc(n1)C	C14H16N2OS2	292.42	19	11	0.29	6	2	1	80.71	95.53	2.31	3.44	3.1	1.77	4.2	2.96	-3.85	0.0411	0.00014	Soluble	-5.13	0.00218	7.46e-06	Moderately soluble	-5.14	0.00211	7.21e-06	Moderately soluble	High	No	No	Yes	Yes	Yes	No	Yes	-5.64	0	0	0	0	0	0.55	0	0	0	2.96
DCM80931	C[C@@H](NC(=O)CSc1ccccn1)CCc1ccccc1	C17H20N2OS	300.42	21	12	0.29	8	2	1	87.48	67.29	2.46	3.79	3.31	2.48	3.83	3.17	-3.99	0.0311	0.000103	Soluble	-4.9	0.00381	1.27e-05	Moderately soluble	-6.29	0.000153	5.11e-07	Poorly soluble	High	Yes	No	Yes	Yes	Yes	Yes	Yes	-5.44	0	0	0	0	0	0.55	0	0	2	2.84
DCM80989	C[C@@H](c1ccccc1)NC(=O)COC(=O)c1cc(ccc1F)S(=O)(=O)N1CCOCC1	C21H23FN2O6S	450.48	31	12	0.33	9	8	1	112.89	110.39	2.85	1.89	2.68	1.37	2.26	2.21	-3.52	0.137	0.000305	Soluble	-3.83	0.0665	0.000148	Soluble	-5.71	0.000878	1.95e-06	Moderately soluble	High	No	Yes	No	Yes	Yes	No	Yes	-7.71	0	0	0	0	0	0.55	0	0	2	3.72
DCM81663	OC(=O)[C@H]1CCCN1[C@H](/C(=N\C(=O)OC(C)(C)C)/Cc1ccccc1)O	C19H26N2O5	362.42	26	6	0.53	8	7	2	102.12	99.43	2.67	0.34	2.09	1.91	2.13	1.83	-1.94	4.12	0.0114	Very soluble	-1.99	3.69	0.0102	Very soluble	-2.81	0.563	0.00155	Soluble	High	No	Yes	No	No	No	No	No	-8.27	0	0	0	0	0	0.55	0	1	2	4.23
DCM81668	CC(C[C@@H](C(=O)N)NC(=O)[C@@H]1CCCN1C(=O)Cc1ccccc1)C	C19H27N3O3	345.44	25	6	0.53	9	3	2	99.9	92.5	2.19	0.85	0.86	1.08	2.02	1.4	-2.1	2.74	0.00793	Soluble	-2.38	1.45	0.00421	Soluble	-3.8	0.0553	0.00016	Soluble	High	No	Yes	No	No	No	No	No	-7.8	0	0	0	0	0	0.55	0	0	1	3.09
DCM82216	CC(C[C@H](C(=O)O)NC(=O)[C@@H]1CCCN1[C@@H](/C=N/C(=O)OCc1ccccc1)O)C	C21H29N3O6	419.47	30	6	0.52	12	8	3	114.7	128.53	2.97	0.11	1.26	1.12	1.89	1.47	-1.87	5.71	0.0136	Very soluble	-2.36	1.81	0.00432	Soluble	-2.83	0.623	0.00149	Soluble	High	No	Yes	No	No	No	No	No	-8.78	0	0	1	0	0	0.55	0	1	2	4.56
DCM82233	CC(NC(=O)[C@H](N1Cc2c(C1=O)cccc2)CSCc1ccccc1)C	C21H24N2O2S	368.49	26	12	0.33	8	2	1	110.22	74.71	3.14	3.28	2.78	2.88	3.96	3.21	-4	0.0365	9.89e-05	Moderately soluble	-4.52	0.011	2.99e-05	Moderately soluble	-6.43	0.000137	3.72e-07	Poorly soluble	High	Yes	No	No	Yes	Yes	Yes	Yes	-6.22	0	0	0	0	0	0.55	0	0	2	3.39
DCM82649	Cc1cnc(cn1)C(=O)N[C@H](c1ccccc1)Cc1ccccc1	C20H19N3O	317.38	24	18	0.15	6	3	1	93.78	54.88	3.02	3.28	3.17	2.1	4.04	3.12	-4.03	0.0294	9.26e-05	Moderately soluble	-4.11	0.0248	7.81e-05	Moderately soluble	-7.51	9.85e-06	3.1e-08	Poorly soluble	High	Yes	No	No	Yes	Yes	Yes	Yes	-5.91	0	0	0	0	0	0.55	0	0	0	2.83
DCM82724	O=C([C@@H](N1CCN(CC1)Cc1ccccc1)C)N[C@@H](c1ccc(cc1)F)C	C22H28FN3O	369.48	27	12	0.41	7	4	1	113.63	35.58	3.6	3.31	2.39	2.88	3.65	3.17	-4.08	0.0305	8.26e-05	Moderately soluble	-3.73	0.0683	0.000185	Soluble	-6.2	0.000234	6.34e-07	Poorly soluble	High	Yes	No	No	No	No	Yes	Yes	-6.2	0	0	0	0	0	0.55	0	0	1	3.13
DCM82828	COc1ccccc1CNC(=O)[C@H](C(C)C)NC(=O)C1CCN(CC1)[C@H](C1=NCCC1)O	C24H36N4O4	444.57	32	6	0.62	11	6	3	131.57	103.26	3.93	1.48	0.8	0.86	3.18	2.05	-2.94	0.509	0.00114	Soluble	-3.26	0.247	0.000555	Soluble	-4.79	0.00716	1.61e-05	Moderately soluble	High	No	Yes	No	No	No	No	No	-7.96	0	1	1	0	0	0.55	0	0	2	4.65
DCM82831	O[C@H](N1CCC[C@H]1C(=O)O)/C(=N\C(=O)[C@H](n1c(=O)[nH]c2c(c1=O)cccc2)Cc1ccccc1)/C	C25H26N4O6	478.5	35	16	0.32	8	8	3	134.16	145.06	2.69	-0.22	0.95	1.67	2.64	1.55	-2.48	1.59	0.00332	Soluble	-2.37	2.05	0.00427	Soluble	-4.62	0.0113	2.37e-05	Moderately soluble	Low	No	No	No	No	No	No	No	-9.38	0	1	1	1	0	0.55	0	1	2	4.7
DCM82875	CC(C[C@H](C(=O)NC[C@@H]1CC[C@H](CC1)C(=O)O)NC(=O)[C@@H]1Cc2ccccc2CN1C(=O)OC(C)(C)C)C	C29H43N3O6	529.67	38	6	0.66	13	6	3	149.39	125.04	4.02	4.08	3.35	2.36	3.33	3.43	-4.95	0.0059	1.11e-05	Moderately soluble	-6.41	0.000206	3.88e-07	Poorly soluble	-5.28	0.00277	5.24e-06	Moderately soluble	High	No	Yes	No	No	No	No	Yes	-6.63	1	3	1	0	0	0.56	0	0	3	5.12
DCM83012	Oc1nc2ccccc2c(c1)C(=O)O[C@H](C(=O)NCc1ccccc1)C	C20H18N2O4	350.37	26	16	0.15	7	5	2	96.96	88.52	2.46	3.26	2.65	2.18	3.03	2.72	-4.06	0.0306	8.72e-05	Moderately soluble	-4.79	0.00564	1.61e-05	Moderately soluble	-6.13	0.000258	7.36e-07	Poorly soluble	High	No	No	No	Yes	Yes	Yes	No	-6.12	0	0	0	0	0	0.55	0	0	1	2.87
DCM83025	CC[C@@H]([C@@H](C(=O)NC1CCCC1)NC(=O)[C@H]1CS[C@H]2N1C(=O)c1c2cccc1)C	C22H29N3O3S	415.55	29	6	0.59	8	3	2	118.16	103.81	3.62	3.23	2.14	2.29	2.75	2.81	-4.08	0.0349	8.39e-05	Moderately soluble	-5.08	0.00343	8.26e-06	Moderately soluble	-4.72	0.00797	1.92e-05	Moderately soluble	High	No	Yes	No	Yes	Yes	Yes	Yes	-6.54	0	0	0	0	0	0.55	0	0	2	4.71
DCM83035	CC(C[C@H](C(=O)NCc1cccnc1)NC(=O)C1CCN(CC1)S(=O)(=O)c1ccccc1)C	C24H32N4O4S	472.6	33	12	0.46	11	6	2	130.2	116.85	3.12	2.33	2.88	0.96	2.2	2.3	-3.78	0.0782	0.000166	Soluble	-4.42	0.0178	3.78e-05	Moderately soluble	-6.5	0.000151	3.2e-07	Poorly soluble	High	No	Yes	No	No	No	Yes	Yes	-7.53	0	1	1	0	0	0.55	0	0	2	4.04
DCM83041	O=C([C@H](NC(=O)C1CCN(CC1)S(=O)(=O)c1ccccc1)C)NCc1cccc(c1)C(F)(F)F	C23H26F3N3O4S	497.53	34	12	0.39	10	8	2	122.99	103.96	3.48	2.97	4.63	2.12	2.85	3.21	-4.4	0.0199	4.01e-05	Moderately soluble	-4.82	0.00759	1.53e-05	Moderately soluble	-6.89	6.47e-05	1.3e-07	Poorly soluble	High	No	Yes	No	Yes	No	Yes	Yes	-7.23	0	1	0	0	0	0.55	0	0	2	3.96
DCM83133	CO[C@@H](/C(=N/C(=O)[C@@H]1CCCN1[C@@H](/C=N/C(=O)OCc1ccccc1)O)/C)O	C19H25N3O6	391.42	28	6	0.47	10	9	2	106.44	121.02	2.7	0.87	0.6	0.67	1.87	1.34	-2.31	1.9	0.00486	Soluble	-3	0.396	0.00101	Soluble	-2.23	2.29	0.00585	Soluble	High	No	Yes	No	No	No	No	No	-8.07	0	0	0	0	0	0.55	0	2	2	4.66
DCM83733	O=C(/C=C/1\[C@@H](O)NCCN1Cc1ccc(cc1Cl)F)NCc1csc(n1)C(C)C	C20H24ClFN4O2S	438.95	29	11	0.4	7	5	3	119.87	105.73	3.44	2.45	2.34	1.66	4.42	2.86	-3.92	0.0523	0.000119	Soluble	-4.31	0.0213	4.85e-05	Moderately soluble	-5.95	0.000496	1.13e-06	Moderately soluble	High	No	Yes	No	Yes	No	Yes	Yes	-7.24	0	0	0	0	0	0.55	0	1	1	4.1
DCM83783	Fc1cccc(c1)CCN1C[C@H](CCC1=O)C(=O)NCCc1nc2c([nH]1)cccc2	C23H25FN4O2	408.47	30	15	0.35	8	4	2	116.67	78.09	2.37	2.68	2.88	2.57	4.39	2.98	-3.9	0.0511	0.000125	Soluble	-3.97	0.0436	0.000107	Soluble	-7.62	9.71e-06	2.38e-08	Poorly soluble	High	Yes	Yes	No	Yes	Yes	Yes	Yes	-6.89	0	0	0	0	0	0.55	0	0	2	3.26
DCM83824	CCn1ccnc1CNC(=O)[C@@H]1CCC(=O)N(C1)Cc1cccc(c1)C(F)(F)F	C20H23F3N4O2	408.42	29	11	0.45	8	6	1	104.3	67.23	2.89	1.37	3.44	1.79	3.1	2.52	-2.99	0.42	0.00103	Soluble	-2.38	1.68	0.00412	Soluble	-5.71	0.000791	1.94e-06	Moderately soluble	High	Yes	Yes	No	Yes	No	Yes	Yes	-7.82	0	0	0	0	0	0.55	0	0	2	3.22
DCM84132	O=C(Nc1cc(ccc1N1CCCCC1)C(F)(F)F)CN1C(=O)N[C@](C1=O)(C)c1ccccc1	C24H25F3N4O3	474.48	34	12	0.38	7	6	2	131.01	81.75	3.2	3.78	3.81	3.07	3.45	3.46	-4.96	0.00517	1.09e-05	Moderately soluble	-5.19	0.00306	6.45e-06	Moderately soluble	-7.15	3.34e-05	7.05e-08	Poorly soluble	High	No	Yes	No	Yes	Yes	Yes	Yes	-6.51	0	1	0	0	0	0.55	0	1	2	3.67
DCM8416	COc1cccc(c1)C[C@@H](C(=O)NC1CCN(CC1)C(=O)NCc1ccccc1)NC(=O)C	C25H32N4O4	452.55	33	12	0.4	12	4	3	129.36	99.77	3.39	2.22	1.7	1.65	2.54	2.3	-3.52	0.136	0.000301	Soluble	-3.95	0.0508	0.000112	Soluble	-6.66	0.0001	2.21e-07	Poorly soluble	High	No	Yes	No	No	No	Yes	Yes	-7.48	0	0	1	0	0	0.55	0	0	2	3.89
DCM84279	O=C(N[C@@H]1CCN(C(=O)CC1)[C@H](Cc1ccccc1)CSc1ccc(cc1)Br)OCc1ccccc1	C29H31BrN2O3S	567.54	36	18	0.31	11	3	1	152.28	83.94	4.18	6.34	5.93	4.85	5.84	5.43	-7	5.72e-05	1.01e-07	Poorly soluble	-7.89	7.26e-06	1.28e-08	Poorly soluble	-9.8	9.02e-08	1.59e-10	Poorly soluble	High	No	Yes	No	Yes	Yes	Yes	Yes	-5.26	2	3	1	1	1	0.17	0	0	3	4.59
DCM84364	OC[C@H](N1C[C@H](C)[C@@H](CN(C(=O)NC(C)C)C)Oc2c(C1=O)cccc2NC(=O)Nc1ccccc1)C	C27H37N5O5	511.61	37	12	0.44	11	5	4	146.87	123.24	3.29	2.42	2.84	2.12	1.35	2.4	-4.05	0.0455	8.9e-05	Moderately soluble	-4.65	0.0114	2.24e-05	Moderately soluble	-5.99	0.00052	1.02e-06	Moderately soluble	High	No	Yes	No	No	No	No	Yes	-7.7	1	3	1	0	0	0.55	0	0	2	4.94
DCM84453	COc1ccc2c(c1)c1CCN3[C@@](c1[nH]2)(C)[C@H](C/C(=C\C(=O)NCCc1ccccn1)/[C@H]3O)C(=O)N1CCOCC1	C31H37N5O5	559.66	41	15	0.45	8	7	3	161.25	120.02	3.56	0.84	1.26	0.59	3.34	1.92	-3.58	0.147	0.000262	Soluble	-2.94	0.638	0.00114	Soluble	-6.9	7.11e-05	1.27e-07	Poorly soluble	High	No	Yes	No	No	No	Yes	Yes	-9.12	1	3	0	0	0	0.55	0	1	2	5.35
DCM84481	O=C(Nc1ccc(cc1)C(=O)N(CCc1ccccc1)C)Cc1ccc(cc1)NC(=O)[C@H]1CCCN(C1)C(=O)C1CCC1	C35H40N4O4	580.72	43	18	0.37	14	4	2	172.79	98.82	4.51	4.24	4.4	3.41	4.96	4.3	-5.5	0.00185	3.18e-06	Moderately soluble	-6.03	0.000547	9.41e-07	Poorly soluble	-9.36	2.52e-07	4.34e-10	Poorly soluble	High	No	Yes	No	Yes	Yes	Yes	Yes	-6.83	1	3	1	0	0	0.55	0	0	3	4.23
DCM84518	CCOc1ccc(cc1)CCN1[C@H](CC(C)C)CN(C(=O)C1=O)[C@@H](CN1CCC[C@H]1CN1[C@H](CNC(=O)C1=O)Cc1ccccc1)CC(C)C	C40H57N5O5	687.91	50	12	0.6	16	6	1	215.79	102.5	4.87	6.79	2.26	2.41	5.68	4.4	-7.5	2.15e-05	3.13e-08	Poorly soluble	-8.75	1.22e-06	1.78e-09	Poorly soluble	-9.14	5.02e-07	7.29e-10	Poorly soluble	High	No	Yes	No	No	No	No	Yes	-5.68	1	3	1	0	3	0.55	0	1	3	5.69
DCM84568	CCN([C@H](c1cc(CC(=O)NC(c2ccccc2)c2ccccc2)c(=O)n(c1C)Cc1ccc(cc1)OC)O)CC	C34H39N3O4	553.69	41	24	0.29	13	5	2	162.72	83.8	4.72	4.21	4.35	3.68	5.95	4.58	-5.5	0.00175	3.16e-06	Moderately soluble	-5.68	0.00116	2.09e-06	Moderately soluble	-10.18	3.63e-08	6.56e-11	Insoluble	High	No	Yes	No	Yes	No	Yes	Yes	-6.69	1	3	1	0	0	0.55	0	1	3	4.92
DCM8457	CCn1c(CNC(=O)c2ccc(cc2)F)cc2c1cccc2	C18H17FN2O	296.34	22	15	0.17	5	2	1	85.45	34.03	2.79	3.21	4	3.22	3.78	3.4	-3.87	0.0396	0.000134	Soluble	-3.6	0.075	0.000253	Soluble	-6.44	0.000107	3.61e-07	Poorly soluble	High	Yes	No	Yes	Yes	No	Yes	Yes	-5.83	0	0	0	0	0	0.55	0	0	0	2.11
DCM84571	CCCCn1c(C)c(cc(c1=O)CC(=O)NC(c1ccccc1)c1ccccc1)[C@@H](N(C)C)O	C28H35N3O3	461.6	34	18	0.36	11	4	2	136.54	74.57	3.88	3.26	3.31	3.29	4.78	3.7	-4.42	0.0175	3.79e-05	Moderately soluble	-4.5	0.0146	3.16e-05	Moderately soluble	-8.03	4.3e-06	9.31e-09	Poorly soluble	High	Yes	Yes	No	No	No	Yes	Yes	-6.8	0	1	1	0	0	0.55	0	1	2	4.45
DCM84583	COc1ccc(cc1)[C@H]1C[C@@H](O)[C@@H](CN1C(=O)C1CCCCC1)n1nnc(c1)COC(=O)c1ccccc1	C29H34N4O5	518.6	38	17	0.45	9	7	1	144.85	106.78	3.78	3.63	3.24	2.64	2.69	3.2	-5.08	0.00432	8.33e-06	Moderately soluble	-5.56	0.00143	2.75e-06	Moderately soluble	-5.94	0.000601	1.16e-06	Moderately soluble	High	No	Yes	No	No	Yes	Yes	Yes	-6.89	1	3	0	0	0	0.55	0	0	3	4.88
DCM84619	OC[C@H](N1C[C@@H](C)[C@H](OCCCC[C@@H](Oc2c(C1=O)cc(cc2)NC(=O)C1CCCCC1)C)CN(Cc1ccncc1)C)C	C35H52N4O5	608.81	44	12	0.63	9	7	2	178.78	104.23	4.18	4.81	4.8	2.18	4.18	4.03	-6.25	0.00034	5.59e-07	Poorly soluble	-6.73	0.000113	1.86e-07	Poorly soluble	-7.76	1.07e-05	1.75e-08	Poorly soluble	High	No	Yes	No	No	No	No	Yes	-6.6	1	3	0	0	1	0.55	0	0	3	6.28
DCM84668	COCCCn1c(C)c(cc(c1=O)CC(=O)NC(c1ccccc1)c1ccccc1)[C@H](N(C)C)O	C28H35N3O4	477.6	35	18	0.36	12	5	2	137.63	83.8	3.78	2.22	2.55	2.49	4.33	3.07	-3.79	0.0778	0.000163	Soluble	-3.61	0.116	0.000243	Soluble	-7.75	8.4e-06	1.76e-08	Poorly soluble	High	No	Yes	No	No	No	Yes	Yes	-7.64	0	1	1	0	0	0.55	0	1	2	4.54
DCM85076	O=C(N[C@@H](C(=O)NC1CCCCC1)Cc1ccccc1)CC[C@@H]1O[C@H]([C@@H]([C@H]1O)O)n1ccc(=O)[nH]c1=O	C26H34N4O7	514.57	37	12	0.54	11	7	5	134.36	162.75	2.73	0.58	-0.21	0.42	1.44	0.99	-2.91	0.633	0.00123	Soluble	-3.57	0.138	0.000269	Soluble	-4.44	0.0186	3.62e-05	Moderately soluble	Low	No	Yes	No	No	No	No	No	-9.03	2	3	2	1	1	0.17	0	0	2	5.21
DCM85663	O=C(CN(C(=O)c1cnn(c1)C(C)C)Cc1ccccc1)NC1CCCC1	C21H28N4O2	368.47	27	11	0.48	9	3	1	105.22	67.23	3.54	2.5	3.01	2.09	2.41	2.71	-3.41	0.144	0.000392	Soluble	-3.56	0.102	0.000277	Soluble	-4.95	0.00413	1.12e-05	Moderately soluble	High	Yes	Yes	No	Yes	No	Yes	Yes	-6.77	0	0	0	0	0	0.55	0	0	2	2.66
DCM85870	CCN1C(=O)N[C@H]([C@@H](C1=C)C(=O)OC)c1cccc(c1)C(F)(F)F	C16H17F3N2O3	342.31	24	6	0.38	5	6	1	87.68	58.64	2.69	2.43	3.16	2.63	2.64	2.71	-3.35	0.154	0.000448	Soluble	-3.3	0.17	0.000496	Soluble	-4.43	0.0127	3.72e-05	Moderately soluble	High	Yes	No	No	Yes	No	No	No	-6.66	0	0	0	0	0	0.55	0	0	0	3.58
DCM86802	Cc1ccc(cc1)NC(=O)[C@@H](NC(=O)C1CCNCC1)Cc1ccccc1	C22H27N3O2	365.47	27	12	0.36	8	3	3	111.46	70.23	2.69	2.83	2.09	2.27	3.46	2.67	-3.69	0.0747	0.000204	Soluble	-3.96	0.0398	0.000109	Soluble	-6.91	4.46e-05	1.22e-07	Poorly soluble	High	Yes	Yes	No	No	No	Yes	Yes	-6.52	0	0	0	0	0	0.55	0	0	2	3.02
DCM86941	O=C(CSc1nc(C)cc(n1)O)NCc1ccc2c(c1)OCO2	C15H15N3O4S	333.36	23	12	0.27	6	6	2	83.91	118.87	2.63	2.08	1.48	0.72	2.25	1.83	-3.21	0.207	0.00062	Soluble	-4.21	0.0208	6.22e-05	Moderately soluble	-4.63	0.00787	2.36e-05	Moderately soluble	High	No	Yes	Yes	No	No	No	Yes	-6.86	0	0	0	0	0	0.55	0	0	0	2.63
DCM87112	Fc1ccc(cc1)NC(=O)[C@@H](NC(=O)C1CCNCC1)Cc1ccccc1	C21H24FN3O2	369.43	27	12	0.33	8	4	3	106.45	70.23	2.7	2.56	2.34	2.43	3.36	2.68	-3.54	0.106	0.000286	Soluble	-3.68	0.0767	0.000208	Soluble	-6.8	5.81e-05	1.57e-07	Poorly soluble	High	Yes	Yes	No	No	No	Yes	Yes	-6.74	0	0	0	0	0	0.55	0	0	2	2.95
DCM87524	CC(/C(=N\C(=O)c1ccccc1)/[C@@H](OCC(=O)N1CCCc2c1cccc2)O)C	C23H26N2O4	394.46	29	12	0.35	8	5	1	115.93	79.2	3.27	3.52	2.86	2.68	3.94	3.25	-4.28	0.0206	5.23e-05	Moderately soluble	-4.87	0.00536	1.36e-05	Moderately soluble	-5.44	0.00143	3.63e-06	Moderately soluble	High	No	No	No	Yes	Yes	No	Yes	-6.21	0	0	0	0	0	0.55	0	2	3	3.91
DCM88797	COCCN([C@H](c1ccc(c(c1)OC)OC)C(=O)NC1CCCC1)[C@@H](/C=N/C(=O)c1ccco1)O	C25H33N3O7	487.55	35	11	0.48	14	9	2	128.97	122.83	4.16	2.46	2.25	0.27	3.14	2.46	-3.72	0.0927	0.00019	Soluble	-4.68	0.0101	2.07e-05	Moderately soluble	-5.21	0.00297	6.1e-06	Moderately soluble	High	No	Yes	No	No	No	No	Yes	-7.53	0	1	1	0	0	0.55	0	2	2	4.88
DCM88879	O=C(N1CCC(CC1)C(=O)NC1CCCC1)NCc1ccccc1	C19H27N3O2	329.44	24	6	0.58	7	2	2	98.07	61.44	3.2	2.09	2.13	2.39	2.13	2.39	-2.92	0.394	0.0012	Soluble	-3.01	0.322	0.000977	Soluble	-4.43	0.0123	3.73e-05	Moderately soluble	High	Yes	Yes	No	No	No	Yes	No	-6.83	0	0	0	0	0	0.55	0	0	0	2.77
DCM88894	COc1ccc(cc1OC)C[C@@H](C(=O)NC1CCN(CC1)C(=O)Nc1ccccc1CC)NC(=O)C	C27H36N4O5	496.6	36	12	0.44	13	5	3	142.35	109	3.99	3.05	2.55	1.81	3.18	2.92	-4.23	0.0293	5.9e-05	Moderately soluble	-5.01	0.00491	9.88e-06	Moderately soluble	-7.12	3.74e-05	7.53e-08	Poorly soluble	High	No	Yes	No	No	No	Yes	Yes	-7.16	0	3	1	0	0	0.55	0	0	2	4.33
DCM88974	COc1ccc(cc1)Cn1c(=O)[nH]c2c(c1=O)ccc(c2)C(=O)NCCCN1CCCCC1	C25H30N4O4	450.53	33	16	0.4	9	5	2	132.41	96.43	3.65	2.61	1.97	2.27	3.93	2.89	-4.04	0.0409	9.07e-05	Moderately soluble	-4.28	0.0234	5.19e-05	Moderately soluble	-7.18	2.97e-05	6.59e-08	Poorly soluble	High	No	Yes	No	Yes	Yes	Yes	Yes	-7.2	0	1	0	0	0	0.55	0	0	2	3.11
DCM88992	COCCn1c(=O)[nH]c2c(c1=O)ccc(c2)C(=O)NCCN1CCN(CC1)c1ccccc1F	C24H28FN5O4	469.51	34	16	0.38	9	6	2	134.33	99.67	3.42	1.49	0.69	1.65	2.82	2.02	-3.44	0.169	0.00036	Soluble	-3.19	0.303	0.000645	Soluble	-6.5	0.000149	3.18e-07	Poorly soluble	High	No	Yes	No	Yes	Yes	Yes	Yes	-8.11	0	1	0	0	0	0.55	0	0	2	3.33
DCM89082	COCCCNC(=O)c1ccc2c(c1)[nH]c(=S)n(c2=O)C1CCCC1	C18H23N3O3S	361.46	25	10	0.5	7	3	2	100.27	108.21	2.96	1.98	2.94	1.87	4.26	2.8	-3.16	0.249	0.000688	Soluble	-3.88	0.0478	0.000132	Soluble	-4.97	0.00385	1.06e-05	Moderately soluble	High	No	Yes	No	Yes	Yes	No	Yes	-7.1	0	0	0	0	0	0.55	0	1	1	2.74
DCM89752	O=C(CN1C(=O)NC2(C1=O)CCCC2)NCc1ccc(cc1)F	C16H18FN3O3	319.33	23	6	0.44	5	4	2	87.76	78.51	2.16	1.14	0.81	1.17	1.9	1.44	-2.4	1.27	0.00397	Soluble	-2.38	1.32	0.00414	Soluble	-4.56	0.0088	2.75e-05	Moderately soluble	High	No	Yes	No	No	No	No	No	-7.44	0	0	0	0	0	0.55	0	1	0	2.71
DCM89771	COCCn1c(=S)[nH]c2c(c1=O)ccc(c2)C(=O)NC1CCCCCC1	C19H25N3O3S	375.49	26	10	0.53	6	3	2	105.08	108.21	3.14	2.71	3.16	1.69	4.36	3.01	-3.76	0.0647	0.000172	Soluble	-4.64	0.00869	2.31e-05	Moderately soluble	-5.12	0.00287	7.66e-06	Moderately soluble	High	No	Yes	No	Yes	Yes	No	Yes	-6.67	0	0	0	0	0	0.55	0	1	1	2.98
DCM90133	O=C(c1ccc2c(c1)[nH]c(=S)n(c2=O)c1ccccc1)NC[C@@H]1CCCO1	C20H19N3O3S	381.45	27	16	0.25	5	3	2	105.92	108.21	2.72	2.47	2.96	2.37	4.39	2.98	-3.87	0.0515	0.000135	Soluble	-4.39	0.0157	4.1e-05	Moderately soluble	-6	0.000382	1e-06	Moderately soluble	High	No	No	Yes	No	Yes	No	Yes	-6.87	0	0	0	0	0	0.55	0	1	1	3.23
DCM90213	Clc1ccc(c(c1)Cl)NC(=O)[C@H](N1C(=O)NC2(C1=O)CCCC2)C	C16H17Cl2N3O3	370.23	24	6	0.44	4	3	2	99.36	78.51	3.02	2.76	2.23	2.06	2.59	2.53	-3.8	0.0593	0.00016	Soluble	-4.06	0.032	8.63e-05	Moderately soluble	-5.11	0.00291	7.85e-06	Moderately soluble	High	No	Yes	Yes	Yes	Yes	No	Yes	-6.6	0	0	0	0	0	0.55	0	1	1	3.43
DCM90563	Fc1ccc(cc1)C(=O)Nc1ccc2c(c1)n(C)c(=O)n2C	C16H14FN3O2	299.3	22	15	0.12	3	3	1	82.89	56.03	2.6	1.86	2.5	2.75	2.08	2.36	-3.17	0.2	0.00067	Soluble	-2.66	0.658	0.0022	Soluble	-4.73	0.0056	1.87e-05	Moderately soluble	High	Yes	No	No	No	No	No	No	-6.81	0	0	0	0	0	0.55	0	0	0	2.08
DCM90724	O=C([C@H](n1cccc1)Cc1ccccc1)NC1CCCC1	C18H22N2O	282.38	21	11	0.39	6	1	1	84.72	34.03	3.08	3.36	3.33	2.49	2.98	3.05	-3.7	0.0564	0.0002	Soluble	-3.75	0.0499	0.000177	Soluble	-4.91	0.0035	1.24e-05	Moderately soluble	High	Yes	No	No	Yes	Yes	Yes	No	-5.64	0	0	0	0	0	0.55	0	0	0	2.6
DCM91006	O=C(/N=C/[C@H]1CC(=O)N(C(=O)N1C)C)CCNC(=O)c1cccc(c1)Cl	C17H19ClN4O4	378.81	26	6	0.35	7	5	1	103.89	99.15	2.72	0.38	0.58	1.27	1.79	1.35	-2.14	2.76	0.0073	Soluble	-2.03	3.55	0.00938	Soluble	-3.91	0.0468	0.000124	Soluble	High	No	No	No	No	No	No	No	-8.34	0	0	0	0	0	0.55	0	1	1	3.69
DCM91011	O=C(/N=C/[C@H]1CC(=O)N(C(=O)N1C)C)CCNC(=O)c1cccc(c1)F	C17H19FN4O4	362.36	26	6	0.35	7	6	1	98.84	99.15	2.56	-0.14	0.48	1.15	1.57	1.13	-1.71	7.11	0.0196	Very soluble	-1.49	11.8	0.0325	Very soluble	-3.58	0.0944	0.000261	Soluble	High	No	No	No	No	No	No	No	-8.61	0	0	0	0	0	0.55	0	1	1	3.68
DCM91426	CCCCCn1c(=O)[nH]c2c(c1=O)ccc(c2)C(=O)NCCN1[C@H](C)CCC[C@@H]1C	C23H34N4O3	414.54	30	10	0.61	9	4	2	125.47	87.2	3.76	3.45	2.49	2.59	3.82	3.22	-4.24	0.0241	5.8e-05	Moderately soluble	-4.96	0.00452	1.09e-05	Moderately soluble	-6.08	0.000344	8.3e-07	Poorly soluble	High	No	Yes	No	No	Yes	Yes	Yes	-6.38	0	0	0	0	0	0.55	0	0	2	3.87
DCM91504	C[C@@H]1CC[C@H](CC1)C(=O)N[C@@H](C(=O)NCCc1ccccc1)C(C)C	C21H32N2O2	344.49	25	6	0.62	9	2	2	102.6	58.2	3.51	4.54	3.31	2.85	3.9	3.62	-4.42	0.0131	3.81e-05	Moderately soluble	-5.48	0.00113	3.28e-06	Moderately soluble	-5.64	0.000796	2.31e-06	Moderately soluble	High	Yes	No	No	No	No	Yes	Yes	-5.18	0	0	0	0	0	0.55	0	0	2	3.42
DCM91661	C[C@H](CNC(=O)CC1=NC(=O)NC(=O)C1)O	C9H13N3O4	227.22	16	0	0.56	5	5	3	61.94	107.86	0.82	-1.39	-1.81	-0.96	0.45	-0.58	-0.04	206	0.906	Very soluble	-0.37	96.1	0.423	Very soluble	-1.53	6.69	0.0294	Soluble	High	No	No	No	No	No	No	No	-8.67	0	1	0	0	0	0.55	0	0	1	3.48
DCM91792	C[C@@H]1CC[C@]2(CC1)NC(=O)N(C2=O)CC(=O)N[C@@H](c1ccc(c(c1)F)F)C	C19H23F2N3O3	379.4	27	6	0.53	5	5	2	102.14	78.51	2.98	2.43	2.4	2.25	2.88	2.59	-3.56	0.105	0.000277	Soluble	-3.72	0.072	0.00019	Soluble	-5.26	0.00206	5.43e-06	Moderately soluble	High	No	Yes	No	No	No	No	Yes	-6.89	0	0	0	0	0	0.55	0	1	1	4.08
DCM91852	O=C(N[C@@H](c1ccccc1Cl)C)CN1C(=O)NC2(C1=O)CCCCCC2	C19H24ClN3O3	377.87	26	6	0.53	5	3	2	107.23	78.51	2.98	3.15	2.08	1.99	2.81	2.6	-4.01	0.0371	9.82e-05	Moderately soluble	-4.47	0.0128	3.4e-05	Moderately soluble	-5.45	0.00135	3.58e-06	Moderately soluble	High	No	Yes	No	Yes	Yes	No	Yes	-6.37	0	0	0	0	0	0.55	0	1	1	3.57
DCM91973	CCc1ccc(cc1)NC(=O)[C@H](Cc1ccccc1)NC(=O)C1CCN(CC1)[C@@H](C(=N)CC(C)C)O	C29H40N4O3	492.65	36	12	0.48	13	5	4	149.96	105.52	3.78	4.28	3.44	2.42	4.59	3.7	-4.98	0.00516	1.05e-05	Moderately soluble	-6.21	0.000305	6.19e-07	Poorly soluble	-7.28	2.59e-05	5.26e-08	Poorly soluble	High	No	Yes	No	No	No	No	Yes	-6.27	0	3	1	0	0	0.55	0	1	3	4.58
DCM91976	CC[C@H](/C(=N/C(=O)[C@H](n1c(=O)[nH]c2c(c1=O)cccc2)Cc1ccccc1)/[C@@H](N1CCC(CC1)C(=O)O)O)C	C29H34N4O6	534.6	39	16	0.41	10	8	3	153.39	145.06	3.61	1.09	2.22	2.47	3.93	2.67	-3.48	0.175	0.000327	Soluble	-3.73	0.0999	0.000187	Soluble	-5.68	0.00112	2.09e-06	Moderately soluble	Low	No	Yes	No	No	No	No	Yes	-8.79	1	3	1	1	0	0.55	0	1	2	5.43
DCM92035	CC([C@@H](C(=O)NC[C@@H]1CC[C@H](CC1)C(=O)O)NC(=O)[C@@H]1Cc2ccccc2CN1C(=O)OC(C)(C)C)C	C28H41N3O6	515.64	37	6	0.64	12	6	3	144.58	125.04	3.14	3.72	2.96	2.17	2.91	2.98	-4.71	0.0101	1.96e-05	Moderately soluble	-6.04	0.000473	9.18e-07	Poorly soluble	-4.89	0.0066	1.28e-05	Moderately soluble	High	No	Yes	No	No	No	No	Yes	-6.8	1	3	1	0	0	0.56	0	0	3	4.99
DCM92079	O=C(Nc1ccc2c(c1)n(C)c(=O)n2C)COc1ccc(cc1)F	C17H16FN3O3	329.33	24	15	0.18	5	4	1	89.01	65.26	2.53	1.9	2.26	2.17	2	2.17	-3.21	0.202	0.000615	Soluble	-2.89	0.421	0.00128	Soluble	-4.86	0.00457	1.39e-05	Moderately soluble	High	Yes	No	No	No	Yes	No	No	-6.96	0	0	0	0	0	0.55	0	0	0	2.39
DCM92409	COc1ccc(cc1)CNC(=O)c1ccc2c(c1)[nH]c(=O)n(c2=O)c1ccccc1	C23H19N3O4	401.41	30	22	0.09	6	4	2	114.14	93.19	2.94	2.93	2.47	3.1	3.76	3.04	-4.32	0.0192	4.77e-05	Moderately soluble	-4.55	0.0113	2.83e-05	Moderately soluble	-7.8	6.29e-06	1.57e-08	Poorly soluble	High	No	No	No	No	Yes	No	Yes	-6.67	0	0	0	0	0	0.55	0	0	1	2.67
DCM92877	C[C@@H](CN1CC[C@H](CCC1=O)NC(=O)OCc1ccccc1)CSc1ccc(cc1)C	C25H32N2O3S	440.6	31	12	0.44	10	3	1	129.87	83.94	4.17	4.79	4.5	3.72	4.63	4.36	-5.22	0.00268	6.08e-06	Moderately soluble	-6.28	0.000229	5.19e-07	Poorly soluble	-7.35	1.97e-05	4.48e-08	Poorly soluble	High	No	No	No	Yes	Yes	Yes	Yes	-5.59	0	0	0	0	0	0.55	0	0	3	4.28
DCM93255	CC(=O)N1CCN(CC1)[C@H](/C(=N\C(=O)c1ccccc1)/Cc1ccccc1)O	C22H25N3O3	379.45	28	12	0.32	7	5	1	116.13	73.21	3.43	2.05	1.23	2.19	2.96	2.37	-3.34	0.174	0.000458	Soluble	-3.22	0.231	0.000608	Soluble	-4.89	0.00488	1.29e-05	Moderately soluble	High	No	No	No	No	No	No	No	-7.16	0	0	0	0	0	0.55	0	1	1	3.78
DCM93444	OC/C(=N\C(=O)/C=C/1\CCCC/C(=C/C(=O)OC(C)(C)C)/[C@@H](OCCN[C@@H]1O)O)/Cc1ccccc1	C27H38N2O7	502.6	36	6	0.52	8	9	4	140.98	137.68	3.58	1.28	1.82	1.49	3.44	2.32	-3.36	0.22	0.000439	Soluble	-3.77	0.0852	0.00017	Soluble	-4.42	0.0192	3.83e-05	Moderately soluble	High	No	Yes	No	No	No	No	No	-8.46	1	3	0	1	0	0.55	0	2	2	5.73
DCM93451	OC/C(=N\C(=O)/C=C/1\CCCCCCC(=O)OC[C@@H]2N([C@H]1O)CCC2)/Cc1ccccc1	C25H34N2O5	442.55	32	6	0.56	5	7	2	127.54	99.43	3.18	2.71	2.41	2.32	3.4	2.8	-4.1	0.0352	7.95e-05	Moderately soluble	-4.45	0.0157	3.54e-05	Moderately soluble	-4.41	0.0173	3.91e-05	Moderately soluble	High	No	Yes	No	No	No	No	No	-7.08	0	0	0	0	0	0.55	0	2	1	5.43
DCM93457	OC/C(=N\C(=O)/C=C/1\CCCC/C(=C\C(=O)OC(C)(C)C)/[C@H](OC[C@@H](N[C@@H]1O)Cc1c[nH]c2c1cccc2)O)/Cc1ccccc1	C36H45N3O7	631.76	46	15	0.42	10	9	5	182.13	153.47	4.67	3.43	3.91	2.32	5.58	3.98	-5.5	0.002	3.17e-06	Moderately soluble	-6.33	0.000293	4.64e-07	Poorly soluble	-7.83	9.34e-06	1.48e-08	Poorly soluble	Low	No	Yes	No	No	No	No	No	-7.72	1	3	1	1	2	0.55	0	2	2	6.52
DCM93464	OC[C@@H](N1C[C@H](C)[C@@H](CN(C(=O)Nc2ccccc2)C)Oc2c(C1=O)cccc2NC(=O)Nc1ccc2c(c1)OCO2)C	C31H35N5O7	589.64	43	18	0.32	11	7	4	164.54	141.7	3.38	3	3.49	2.37	1.6	2.77	-4.97	0.00632	1.07e-05	Moderately soluble	-5.64	0.00135	2.29e-06	Moderately soluble	-7.34	2.67e-05	4.53e-08	Poorly soluble	Low	No	Yes	No	No	No	Yes	Yes	-7.77	2	3	2	1	0	0.17	0	0	2	5.36
DCM93468	OC[C@H](N1C[C@@H](C)[C@@H](CN(C(=O)Nc2c(C)noc2C)C)Oc2c(C1=O)cc(cc2)NC(=O)C1CCCCC1)C	C29H41N5O6	555.67	40	11	0.59	10	7	3	155.98	137.24	4.29	3.12	3.43	1.79	2.51	3.03	-4.79	0.00892	1.61e-05	Moderately soluble	-5.67	0.00119	2.13e-06	Moderately soluble	-6.12	0.000423	7.62e-07	Poorly soluble	Low	No	Yes	No	No	No	No	Yes	-7.47	2	3	0	1	0	0.17	0	0	2	5.48
DCM93470	OC[C@@H](N1C[C@H](C)[C@H](CN(C(=O)Nc2ccccc2)C)Oc2c(C1=O)cc(cc2)NC(=O)Nc1ccc(cc1)C(F)(F)F)C	C31H34F3N5O5	613.63	44	18	0.32	12	8	4	163.48	123.24	3.89	4.07	5.93	3.23	2.89	4	-5.72	0.00117	1.91e-06	Moderately soluble	-6.36	0.000266	4.34e-07	Poorly soluble	-8.45	2.2e-06	3.59e-09	Poorly soluble	Low	No	Yes	No	No	No	Yes	Yes	-7.15	1	4	1	1	1	0.55	0	0	3	5.02
DCM93475	OC[C@H](N1C[C@@H](C)[C@H](CN(C(=O)Nc2cccc3c2cccc3)C)Oc2c(CC1=O)cc(cc2)NC(=O)Nc1c(C)noc1C)C	C34H40N6O6	628.72	46	21	0.35	11	7	4	180.56	149.27	3.66	3.62	4.45	2.39	2.91	3.41	-5.63	0.00147	2.34e-06	Moderately soluble	-6.44	0.000227	3.61e-07	Poorly soluble	-9.11	4.9e-07	7.8e-10	Poorly soluble	Low	No	Yes	No	No	No	Yes	Yes	-7.56	2	3	2	1	1	0.17	0	0	3	6.23
DCM93476	OC[C@@H](N1C[C@H](C)[C@H](CN(C(=O)Nc2c(C)noc2C)C)Oc2c(C1=O)cccc2NC(=O)Cc1ccccc1)C	C30H37N5O6	563.64	41	17	0.4	11	7	3	158.55	137.24	3.37	2.64	3.09	1.76	2.82	2.74	-4.58	0.0149	2.64e-05	Moderately soluble	-5.17	0.00379	6.72e-06	Moderately soluble	-7.59	1.44e-05	2.55e-08	Poorly soluble	Low	No	Yes	No	No	No	Yes	Yes	-7.86	2	3	1	1	0	0.17	0	0	2	5.44
DCM93507	OC[C@H](N1C[C@@H](C)[C@H](OCCCC[C@@H](Oc2c(C1=O)cc(cc2)NC(=O)c1ccccc1)C)CN(Cc1ccc2c(c1)OCO2)C)C	C37H47N3O7	645.78	47	18	0.46	9	8	2	185.03	109.8	4.47	5.27	4.87	2.49	4.49	4.32	-6.85	9.05e-05	1.4e-07	Poorly soluble	-7.33	3.05e-05	4.72e-08	Poorly soluble	-8.91	7.93e-07	1.23e-09	Poorly soluble	High	No	Yes	No	No	No	No	Yes	-6.5	1	3	0	0	2	0.55	0	0	3	6.42
DCM93508	OC[C@H](N1C[C@@H](C)[C@H](OCCCC[C@@H](Oc2c(C1=O)cc(cc2)NC(=O)C1CCCCC1)C)CN(C(=O)NC(C)C)C)C	C33H54N4O6	602.81	43	6	0.73	10	6	3	174.31	120.44	4.29	4.48	4.48	2.42	3.16	3.77	-5.84	0.000865	1.44e-06	Moderately soluble	-6.73	0.000112	1.86e-07	Poorly soluble	-6.04	0.000551	9.14e-07	Poorly soluble	High	No	Yes	No	No	No	No	Yes	-6.8	1	3	0	0	1	0.55	0	0	3	6.39
DCM93560	CN(C(=O)c1ccc(cc1)NC(=O)Cc1ccc(cc1)NC(=O)C1CCN(CC1)C(=O)C1CCCCC1)Cc1ccccc1	C36H42N4O4	594.74	44	18	0.39	13	4	2	177.6	98.82	4.39	4.86	4.98	3.59	5.03	4.57	-6.03	0.00055	9.25e-07	Poorly soluble	-6.67	0.000127	2.14e-07	Poorly soluble	-9.5	1.89e-07	3.18e-10	Poorly soluble	High	No	Yes	Yes	Yes	No	Yes	No	-6.48	1	3	1	0	0	0.55	0	0	3	3.8
DCM93563	O=C(Nc1ccc(cc1)C(=O)N(Cc1ccccc1)C)Cc1ccc(cc1)NC(=O)[C@H]1CCCN(C1)C(=O)C1CCC1	C34H38N4O4	566.69	42	18	0.35	13	4	2	167.98	98.82	4.4	3.78	4.2	3.23	4.55	4.03	-5.19	0.00363	6.4e-06	Moderately soluble	-5.55	0.0016	2.83e-06	Moderately soluble	-8.98	5.99e-07	1.06e-09	Poorly soluble	High	No	Yes	No	Yes	Yes	Yes	Yes	-7.07	1	3	1	0	0	0.55	0	0	3	4.09
DCM93574	C[C@@H]([C@H]1[C@@H](C[C@@H]2N(C1=O)CCc1c2cc(cc1)Oc1ccccc1C)N(C(=O)NC1CCCCC1)C)O	C30H39N3O4	505.65	37	12	0.53	7	4	2	148.08	82.11	4	4.78	4.25	3.36	3.31	3.94	-5.76	0.00087	1.72e-06	Moderately soluble	-6.24	0.000294	5.81e-07	Poorly soluble	-6.35	0.000225	4.46e-07	Poorly soluble	High	No	Yes	No	No	No	Yes	Yes	-5.99	1	3	0	0	0	0.55	0	0	2	5.04
DCM93597	O=C(N[C@@H](c1ccccc1)C)COC(=O)C1CCN(CC1)c1ccc(cn1)C(F)(F)F	C22H24F3N3O3	435.44	31	12	0.41	9	7	1	111.5	71.53	3.1	3.78	4.18	2.86	3.73	3.53	-4.61	0.0106	2.43e-05	Moderately soluble	-4.98	0.0046	1.06e-05	Moderately soluble	-6.34	0.000198	4.55e-07	Poorly soluble	High	Yes	No	No	Yes	Yes	Yes	Yes	-6.27	0	0	0	0	0	0.55	0	0	3	3.69
DCM93630	CCN([C@H](c1cc(CC(=O)NC(c2ccccc2)c2ccccc2)c(=O)n(c1C)Cc1ccccc1)O)CC	C33H37N3O3	523.67	39	24	0.27	12	4	2	156.22	74.57	4.58	4.24	4.34	4.03	5.86	4.61	-5.42	0.00198	3.79e-06	Moderately soluble	-5.52	0.00159	3.04e-06	Moderately soluble	-10.09	4.25e-08	8.11e-11	Insoluble	High	Yes	Yes	No	Yes	Yes	Yes	Yes	-6.48	1	3	1	0	0	0.55	0	1	3	4.8
DCM93636	O=C(Cc1cc([C@@H](N(C)C)O)c(n(c1=O)Cc1ccccc1)C)NCc1cccs1	C23H27N3O3S	425.54	30	17	0.3	9	4	2	120	102.81	2.77	1.52	2.2	2.3	4.34	2.62	-3.26	0.233	0.000548	Soluble	-3.29	0.219	0.000516	Soluble	-6.5	0.000136	3.19e-07	Poorly soluble	High	No	Yes	No	No	No	Yes	Yes	-7.82	0	0	0	0	0	0.55	0	1	2	3.89
DCM93637	O=C(Cc1cc([C@@H](N(C)C)O)c(n(c1=O)Cc1ccccc1)C)NCc1cccc2c1cccc2	C29H31N3O3	469.57	35	22	0.24	9	4	2	139.63	74.57	3.18	3.06	3.29	3.31	4.78	3.52	-4.55	0.0132	2.82e-05	Moderately soluble	-4.29	0.0239	5.1e-05	Moderately soluble	-8.86	6.51e-07	1.39e-09	Poorly soluble	High	Yes	Yes	No	No	Yes	Yes	Yes	-6.99	0	1	0	0	0	0.55	0	1	2	4.09
DCM93667	OC[C@H](N1C[C@H](C)[C@@H](CN(Cc2ccc(cc2)Oc2ccccc2)C)Oc2c(C1=O)cc(cn2)c1cccnc1)C	C33H36N4O4	552.66	41	24	0.3	9	7	1	162.37	88.02	4.45	4.62	4.76	2.5	4.54	4.17	-6.02	0.000532	9.63e-07	Poorly soluble	-6.19	0.000354	6.4e-07	Poorly soluble	-9.5	1.74e-07	3.15e-10	Poorly soluble	High	No	Yes	No	Yes	No	Yes	Yes	-6.39	1	3	0	0	0	0.55	0	0	3	5.15
DCM93678	OC[C@@H](N1C[C@H](C)[C@@H](OCCCC[C@H](Oc2c(C1=O)cc(cc2)NC(=O)Cc1ccccc1)C)CN(C(=O)NC1CCCCC1)C)C	C37H54N4O6	650.85	47	12	0.59	11	6	3	189.18	120.44	4.07	5	5.07	2.91	3.96	4.2	-6.49	0.000211	3.25e-07	Poorly soluble	-7.27	3.5e-05	5.38e-08	Poorly soluble	-8.07	5.53e-06	8.49e-09	Poorly soluble	Low	No	Yes	No	No	No	No	Yes	-6.72	1	3	1	0	1	0.55	0	0	3	6.57
DCM93682	OC[C@H](N1C[C@@H](C)[C@@H](OCCCC[C@@H](Oc2c(C1=O)cc(cc2)NC(=O)C1CCCCC1)C)CN(C(=O)CCCN(C)C)C)C	C35H58N4O6	630.86	45	6	0.74	12	7	2	183.63	111.65	4.45	4.18	4.23	1.98	3.72	3.71	-5.69	0.00128	2.04e-06	Moderately soluble	-6.23	0.000369	5.84e-07	Poorly soluble	-6.45	0.000223	3.54e-07	Poorly soluble	High	No	Yes	No	No	No	No	Yes	-7.18	1	3	1	0	1	0.55	0	0	3	6.59
DCM93699	COc1ccc(cc1)Cn1c(C)c(cc(c1=O)CC(=O)NCCc1ccccn1)[C@@H](N(C(C)C)C(C)C)O	C30H40N4O4	520.66	38	18	0.43	13	6	2	150.45	96.69	4.13	2.81	3.3	2.35	4.96	3.51	-4.33	0.0243	4.67e-05	Moderately soluble	-4.5	0.0166	3.18e-05	Moderately soluble	-8.16	3.63e-06	6.97e-09	Poorly soluble	High	No	Yes	No	No	No	Yes	Yes	-7.48	1	3	1	0	0	0.55	0	1	2	4.6
DCM93909	O=C([C@]1(C)CCN1C1Cc2c(C1)cccc2)NCc1cccc(c1)C(F)(F)F	C22H23F3N2O	388.43	28	12	0.41	6	5	1	105.13	32.34	3.51	4.4	4.57	3.94	4.94	4.27	-4.94	0.00445	1.14e-05	Moderately soluble	-4.8	0.00621	1.6e-05	Moderately soluble	-7.28	2.04e-05	5.26e-08	Poorly soluble	High	Yes	Yes	No	No	No	Yes	Yes	-5.55	0	0	0	0	0	0.55	0	0	2	3.55
DCM94086	O=C(Cc1cc([C@@H](N2CCCCCC2)O)c(n(c1=O)Cc1ccccc1)C)NC(c1ccccc1)c1ccccc1	C35H39N3O3	549.7	41	24	0.31	10	4	2	167.64	74.57	4.83	4.71	4.49	4.39	6.1	4.9	-5.99	0.000564	1.03e-06	Moderately soluble	-6	0.000544	9.89e-07	Poorly soluble	-10.14	3.95e-08	7.19e-11	Insoluble	High	No	Yes	No	Yes	No	Yes	Yes	-6.31	2	3	0	0	0	0.17	0	0	3	4.96
DCM94188	O=C(C[C@@H]1C(=O)N=c2c(=C1O)cccc2)NCc1cccc(c1)F	C18H15FN2O3	326.32	24	12	0.17	5	5	2	88.27	78.76	1.93	1.37	0.86	1.74	3.64	1.91	-2.77	0.559	0.00171	Soluble	-2.63	0.771	0.00236	Soluble	-5.93	0.000387	1.19e-06	Moderately soluble	High	No	No	No	No	No	No	No	-7.32	0	0	0	0	0	0.55	0	0	0	3.93
DCM9431	C[C@@H]([C@@H](c1cccs1)N1CCN(CC1)Cc1ccccc1)NC(=O)C(C)(C)C	C23H33N3OS	399.59	28	11	0.52	8	3	1	125.71	63.82	3.83	3.96	2.92	2.76	4.71	3.63	-4.57	0.0106	2.66e-05	Moderately soluble	-5	0.00399	9.98e-06	Moderately soluble	-5.99	0.000412	1.03e-06	Moderately soluble	High	Yes	Yes	No	No	No	Yes	Yes	-5.93	0	0	0	0	0	0.55	0	0	3	4.04
DCM94549	O[C@H]1C[C@H](N(C1)C(=O)OCc1ccccc1)C(=O)NC1CCCCC1	C19H26N2O4	346.42	25	6	0.58	7	4	2	97.51	78.87	3.18	2.32	1.67	1.57	1.56	2.06	-3.17	0.237	0.000684	Soluble	-3.61	0.0841	0.000243	Soluble	-3.3	0.173	0.0005	Soluble	High	No	Yes	No	No	No	Yes	No	-6.77	0	0	0	0	0	0.55	0	0	0	3.76
DCM947	NC(=O)/C=C/[C@H](C(O)O)NC(=O)C1CCN(CC1)[C@@H](/C(=N\C(=O)OC(C)(C)C)/Cc1ccccc1)O	C25H36N4O7	504.58	36	6	0.52	13	9	5	136.95	174.78	2.87	0.28	0.09	0.36	1.32	0.98	-2.41	1.96	0.00389	Soluble	-3.51	0.155	0.000308	Soluble	-2.21	3.14	0.00622	Soluble	Low	No	Yes	No	No	No	No	No	-9.18	2	3	2	1	1	0.17	0	3	2	5.36
DCM94858	O=C(C1CCN(CC1)C(=O)OC(C)(C)C)N[C@H](C(=O)O)Cc1ccccc1	C20H28N2O5	376.45	27	6	0.55	9	5	2	105.08	95.94	2.89	2.47	2.06	1.73	1.91	2.21	-3.3	0.188	0.000501	Soluble	-4.13	0.028	7.43e-05	Moderately soluble	-3.56	0.104	0.000276	Soluble	High	No	Yes	No	No	No	No	No	-6.84	0	0	0	0	0	0.56	0	0	2	3.28
DCM9534	Cc1cccc(c1)CO[C@H](/C(=N\C(=O)N)/Cc1ccccc1)O	C18H20N2O3	312.36	23	12	0.22	7	4	2	89.32	84.91	2.37	2.22	2.44	2.71	3.15	2.58	-3.1	0.248	0.000796	Soluble	-3.64	0.0719	0.00023	Soluble	-4.99	0.00319	1.02e-05	Moderately soluble	High	No	No	No	No	No	No	No	-6.63	0	0	0	0	0	0.55	0	2	0	3.72
DCM95420	CCCC(=O)Nc1nn2c(n1)nc(cc2O)c1ccccc1	C15H15N5O2	297.31	22	15	0.2	5	5	2	82.17	92.41	2.22	2.07	2.04	1.79	1.18	1.86	-3.16	0.205	0.000689	Soluble	-3.64	0.0681	0.000229	Soluble	-4.47	0.0101	3.38e-05	Moderately soluble	High	No	No	Yes	No	No	No	No	-6.64	0	0	0	0	0	0.55	0	0	0	2.77
DCM9561	O[C@H](/C(=N/C(=O)c1ccccc1)/C(C)C)OCC(=O)N1CCCC1	C18H24N2O4	332.39	24	6	0.5	8	5	1	95.54	79.2	2.99	2.06	1.5	1.53	2.76	2.17	-2.86	0.463	0.00139	Soluble	-3.35	0.148	0.000445	Soluble	-3.25	0.188	0.000566	Soluble	High	No	No	No	No	No	No	No	-6.87	0	0	0	0	0	0.55	0	2	1	3.68
DCM95987	O=C(Cc1ccc(cc1)F)NCc1cc(C)nc2c1cccc2	C19H17FN2O	308.35	23	16	0.16	5	3	1	88.74	41.99	2.93	3.4	3.81	3.15	4.76	3.61	-4.08	0.0257	8.35e-05	Moderately soluble	-3.96	0.0337	0.000109	Soluble	-7.68	6.46e-06	2.09e-08	Poorly soluble	High	Yes	No	Yes	Yes	No	Yes	Yes	-5.77	0	0	0	0	0	0.55	0	0	0	2.04
DCM97265	C[C@H](Cc1ccccc1)NC(=O)[C@@H]1CCCNC1=O	C15H20N2O2	260.33	19	6	0.47	5	2	2	77.67	58.2	1.95	2.45	0.88	1.44	2.37	1.82	-2.9	0.327	0.00126	Soluble	-3.32	0.126	0.000483	Soluble	-4.34	0.0119	4.58e-05	Moderately soluble	High	Yes	No	No	No	No	No	No	-6.15	0	0	0	0	0	0.55	0	1	0	2.49
DCM97267	O=C(c1ccc(cc1)C(C)(C)C)N[C@@H](C(=O)O)Cc1ccccc1	C20H23NO3	325.4	24	12	0.3	7	3	2	94.58	66.4	2.92	4.26	3.41	3.46	3.83	3.58	-4.45	0.0116	3.55e-05	Moderately soluble	-5.37	0.0014	4.3e-06	Moderately soluble	-5.93	0.000384	1.18e-06	Moderately soluble	High	Yes	Yes	No	No	No	No	No	-5.26	0	0	0	0	0	0.56	0	0	1	2.56
DCM9740	COc1ccc(cc1)CNC(=O)[C@H](NC(=O)C1CCN(CC1)[C@H](C(=N)Cc1ccccc1)O)C	C26H34N4O4	466.57	34	12	0.42	12	6	4	135.52	114.75	3.34	2.13	1.58	1.04	3.08	2.23	-3.54	0.133	0.000286	Soluble	-4.17	0.0315	6.74e-05	Moderately soluble	-6.21	0.00029	6.21e-07	Poorly soluble	High	No	Yes	No	No	No	Yes	No	-7.63	0	1	1	0	0	0.55	0	1	2	4.14
DCM9744	CC(/C(=N/C(=O)[C@H](n1c(=O)[nH]c2c(c1=O)cccc2)Cc1ccccc1)/[C@H](N1CCC[C@H]1C(=O)O)O)C	C27H30N4O6	506.55	37	16	0.37	9	8	3	143.78	145.06	3.34	0.83	1.58	2.07	3.28	2.22	-3.23	0.299	0.00059	Soluble	-3.46	0.176	0.000348	Soluble	-5.03	0.00474	9.35e-06	Moderately soluble	Low	No	Yes	No	No	No	No	Yes	-8.8	1	2	1	1	0	0.55	0	1	2	5.03
DCM98164	CCC(C(=O)c1c[nH]c(c1)C(=O)NCc1ccc(cc1)F)CC	C18H21FN2O2	316.37	23	11	0.33	8	3	2	87.66	61.96	2.54	3.36	3.97	2.22	4.68	3.35	-3.74	0.057	0.00018	Soluble	-4.34	0.0145	4.58e-05	Moderately soluble	-6.37	0.000135	4.26e-07	Poorly soluble	High	Yes	No	Yes	Yes	No	Yes	No	-5.84	0	0	0	0	0	0.55	0	0	1	2.48
DCM98237	CCOCCCn1c(=S)[nH]c2c(c1=O)ccc(c2)C(=O)NCc1ccc(cc1)F	C21H22FN3O3S	415.48	29	16	0.29	9	4	2	112.41	108.21	3.42	2.67	3.82	2.3	5.63	3.57	-3.91	0.0508	0.000122	Soluble	-4.59	0.0106	2.55e-05	Moderately soluble	-7.38	1.74e-05	4.2e-08	Poorly soluble	High	No	No	Yes	Yes	Yes	Yes	Yes	-6.94	0	0	0	0	0	0.55	0	1	2	2.96
DCM98443	O=C(N[C@H]1CCCC[C@@H]1C)COC(=O)c1cc(O)nc2c1cccc2	C19H22N2O4	342.39	25	10	0.42	6	5	2	94.39	88.52	3.02	3.61	2.79	2.18	2.63	2.84	-4.14	0.025	7.29e-05	Moderately soluble	-5.16	0.00239	6.98e-06	Moderately soluble	-4.78	0.0057	1.66e-05	Moderately soluble	High	No	No	No	No	Yes	No	No	-5.83	0	0	0	0	0	0.55	0	0	1	3.28
DCM9847	CCN1C(=O)N[C@@H]([C@@H]([C@H]1C)C(=O)OC)c1cccc(c1)C(F)(F)F	C16H19F3N2O3	344.33	24	6	0.5	5	6	1	88.15	58.64	2.54	2.4	3.04	2.71	2.37	2.61	-3.34	0.157	0.000455	Soluble	-3.27	0.184	0.000533	Soluble	-4.2	0.0218	6.34e-05	Moderately soluble	High	Yes	No	No	No	No	No	No	-6.7	0	0	0	0	0	0.55	0	0	0	3.43
DCM98629	CCN(CCn1c(=S)[nH]c2c(c1=O)ccc(c2)C(=O)NCc1ccccc1Cl)CC	C22H25ClN4O2S	444.98	30	16	0.32	9	3	2	124.08	102.22	3.65	3.4	3.83	2.63	5.49	3.8	-4.54	0.0128	2.87e-05	Moderately soluble	-5.23	0.00264	5.94e-06	Moderately soluble	-7.67	9.54e-06	2.14e-08	Poorly soluble	High	No	No	No	Yes	Yes	Yes	Yes	-6.6	0	0	0	0	0	0.55	0	1	2	3.25
DCM98937	O=C(C1CC1)NNC(=O)c1cc(O)nc2c1cccc2	C14H13N3O3	271.27	20	10	0.21	5	4	3	72.07	91.32	1.97	1.41	1.05	1.36	1.1	1.38	-2.45	0.962	0.00355	Soluble	-2.93	0.317	0.00117	Soluble	-3.73	0.051	0.000188	Soluble	High	No	Yes	Yes	No	No	No	No	-6.95	0	0	0	0	0	0.55	0	0	0	2.13
DCM98946	O=C(CN1C(=O)N[C@](C1=O)(C)c1ccc(cc1)Cl)NCc1ccc(cc1)F	C19H17ClFN3O3	389.81	27	12	0.21	6	4	2	104.79	78.51	2.68	2.59	1.96	2.54	3.27	2.61	-3.82	0.0588	0.000151	Soluble	-3.89	0.0505	0.00013	Soluble	-6.92	4.66e-05	1.2e-07	Poorly soluble	High	No	Yes	No	Yes	Yes	No	Yes	-6.84	0	0	0	0	0	0.55	0	1	1	2.98
ZINC000373659060	O=C1Nc2cc(F)ccc2[C@H](C1)C(=O)Nc1ccc(cc1c1cnn(c1)C)F	C20H16F2N4O2	382.36	28	17	0.15	4	5	2	102.77	76.02	2.57	1.75	3.51	2.67	3.13	2.73	-3.5	0.121	0.000317	Soluble	-2.96	0.416	0.00109	Soluble	-6.87	5.19e-05	1.36e-07	Poorly soluble	High	Yes	Yes	No	No	No	Yes	Yes	-7.39	0	0	0	0	0	0.55	0	0	1	3.31
ZINC000452259570	C[C@@H]1NC(=O)C[C@@H](C1)C(=O)NC1(CC1)c1ccc(cc1)OC(F)(F)F	C17H19F3N2O3	356.34	25	6	0.53	6	6	2	86.93	67.43	2.74	2.34	3.31	1.73	3.08	2.64	-3.31	0.177	0.000495	Soluble	-3.4	0.143	0.000402	Soluble	-5.05	0.00315	8.83e-06	Moderately soluble	High	Yes	Yes	No	No	No	Yes	Yes	-6.81	0	0	0	0	0	0.55	0	0	1	2.86
ZINC000541677852	CC[C@H]1NC(=O)C[C@H](C1)C(=O)Nc1cc(nn1c1cccc(c1)C(F)(F)F)C	C19H21F3N4O2	394.39	28	11	0.42	6	6	2	101.49	76.02	2.92	2.99	4.02	2.51	3	3.09	-4.06	0.0341	8.64e-05	Moderately soluble	-4.25	0.0222	5.62e-05	Moderately soluble	-5.79	0.000644	1.63e-06	Moderately soluble	High	Yes	Yes	No	Yes	No	Yes	Yes	-6.58	0	0	0	0	0	0.55	0	0	1	3.6
ZINC000543523838	CC[C@H]1NC(=O)C[C@@H](C1)C(=O)Nc1cc(nn1c1cccc(c1)Br)C	C18H21BrN4O2	405.29	25	11	0.39	5	3	2	104.19	76.02	3.21	2.8	2.61	2.7	2.6	2.78	-4.11	0.0313	7.72e-05	Moderately soluble	-4.05	0.0359	8.85e-05	Moderately soluble	-5.74	0.000731	1.8e-06	Moderately soluble	High	Yes	Yes	No	Yes	Yes	Yes	Yes	-6.78	0	0	0	0	0	0.55	0	0	1	3.6
ZINC000544491494	C[C@H]1NC(=O)C[C@@H](C1)C(=O)Nc1cc(nn1c1cccc(c1)Br)C	C17H19BrN4O2	391.26	24	11	0.35	4	3	2	99.38	76.02	2.66	2.27	2.22	2.06	2.22	2.29	-3.77	0.0663	0.000169	Soluble	-3.5	0.123	0.000314	Soluble	-5.35	0.00174	4.46e-06	Moderately soluble	High	Yes	Yes	No	Yes	No	Yes	Yes	-7.08	0	0	0	0	0	0.55	0	0	1	3.49
ZINC000636416501	O=C1Nc2cc(F)ccc2[C@H](C1)C(=O)Nc1cc(nn1c1cccc(c1)Cl)C	C20H16ClFN4O2	398.82	28	17	0.15	4	4	2	107.43	76.02	2.92	3.04	3.7	3.05	3.35	3.21	-4.41	0.0154	3.86e-05	Moderately soluble	-4.3	0.0199	4.99e-05	Moderately soluble	-7.19	2.57e-05	6.46e-08	Poorly soluble	High	Yes	Yes	Yes	Yes	Yes	Yes	Yes	-6.57	0	0	0	0	0	0.55	0	0	1	3.37
ZINC001062595734	CC[C@H]1NC(=O)C[C@@H](C1)C(=O)NC1(CCC1)CNC(=O)c1n[nH]cc1	C17H25N5O3	347.41	25	5	0.65	8	4	4	95	115.98	1.77	0.18	0.1	0.15	1.59	0.76	-1.73	6.51	0.0187	Very soluble	-2.17	2.33	0.00671	Soluble	-4.36	0.0151	4.36e-05	Moderately soluble	High	No	Yes	No	No	No	No	No	-8.29	0	0	0	0	0	0.55	0	0	1	3.39
ZINC001186058814	O[C@H]1CCN(C1)CC(=O)N[C@H](C(=O)N1CCC[C@H]1C(=O)N)Cc1[nH]cnc1	C17H26N6O4	378.43	27	5	0.65	9	6	4	102.71	144.65	0.73	-2.32	-2.78	-2.07	-0.67	-1.42	-0.27	204	0.54	Very soluble	-0.18	249	0.659	Very soluble	-1.43	14.2	0.0374	Soluble	Low	No	No	No	No	No	No	No	-10.26	0	1	1	1	1	0.55	0	0	2	3.99
ZINC001218583693	CSc1nc(NC(=O)c2cccc(c2)NC(=O)[C@H]2NC[C@H](C2)S)cc(=O)[nH]1	C17H19N5O3S2	405.49	27	12	0.29	7	5	4	112.06	180.08	1.64	0.56	0.58	0.68	1.75	1.04	-2.57	1.08	0.00267	Soluble	-3.91	0.0494	0.000122	Soluble	-5.3	0.00202	4.98e-06	Moderately soluble	Low	No	Yes	No	No	No	No	No	-8.38	0	0	1	1	1	0.55	0	1	1	3.67
ZINC001655436520	O[C@@H](C(F)(F)F)[C@@H](Cc1ccccc1)NCc1cc(=O)n2c(n1)[nH]c(n2)N	C16H17F3N6O2	382.34	27	15	0.31	7	8	4	90.85	121.33	1.14	0.43	1.74	1.34	1.43	1.21	-2.43	1.42	0.00371	Soluble	-2.55	1.09	0.00285	Soluble	-4.61	0.00932	2.44e-05	Moderately soluble	High	No	Yes	No	No	No	No	No	-8.33	0	0	0	0	0	0.55	0	0	1	3.66

## Sheet: hits_6LU7_MOE
ID	S_MOE_6LU7	rmsd_refine	E_conf	E_place	E_score1	E_refine	E_score2	M. Weight
DBB10063	-10.1495	2.19775	52.4034	-95.4655	-12.1237	-61.7551	-10.1495	1068.38
DBB10073	-11.9028	2.29101	136.121	-5.58058	-7.03626	-65.6111	-11.9028	1084.37
DBB10128	-11.2268	2.26745	-320.325	-68.9817	-7.27278	-77.4539	-11.2268	1200.33
DBB10149	-9.14632	2.01626	27.8828	-8.60009	-7.28771	-37.281	-9.14632	1098.4
DBB10150	-10.2136	1.79031	43.6923	-49.3458	-7.55644	-67.0186	-10.2136	1082.4
DBB10167	-11.0617	3.72443	-415.926	-92.1342	-8.05377	-68.9142	-11.0617	1160.39
DBB10185	-13.3668	3.96856	-510.103	-148.618	-9.01895	-83.3406	-13.3668	1172.4
DBB10210	-10.4035	4.26468	49.4585	-39.5741	-8.0353	-63.2899	-10.4035	1064.36
DBB10732	-11.2673	3.54928	-148.563	-21.9432	-5.16451	-65.0605	-11.2673	1523.8
DBB11539	-7.69807	1.735	30.3412	-53.8905	-10.3715	-44.853	-7.69807	431.872
DBB11743	-8.01095	3.04535	61.3709	-67.5076	-10.651	-40.1263	-8.01095	405.495
DBB11880	-6.11664	2.1077	-26.3651	-56.6847	-9.47684	-31.9509	-6.11664	239.746
DBB11882	-6.23993	1.24367	18.8218	-47.391	-9.72527	-27.8078	-6.23993	255.745
DBB11884	-5.49453	1.47701	-17.2738	-54.0442	-9.47974	-28.3643	-5.49453	213.62
DBB11895	-5.56302	3.01104	24.0316	-80.7308	-10.1396	-27.0588	-5.56302	215.636
DBB11972	-5.09508	3.25421	-48.3351	-68.9688	-8.98956	-24.8784	-5.09508	179.15
DBB12105	-6.04378	1.54669	25.4613	-42.4343	-8.34111	-31.3381	-6.04378	206.285
DBB12224	-7.50025	1.48121	36.3268	-64.4322	-10.9827	-41.9559	-7.50025	354.402
DBB12241	-7.29052	2.39225	29.0827	-62.1712	-10.3669	-39.3736	-7.29052	354.402
DBB12292	-6.90254	1.09523	62.4312	-80.7653	-10.5444	-36.9109	-6.90254	356.442
DBB12343	-7.01504	1.57672	-7.61146	-54.9907	-8.93712	-40.2355	-7.01504	371.433
DBB12401	-7.25112	1.34142	-32.0273	-53.6019	-10.1215	-38.6778	-7.25112	349.434
DBB12536	-7.37162	1.09826	-15.6312	-70.3745	-10.9015	-41.5416	-7.37162	340.419
DBB12590	-7.56883	1.35038	-20.9296	-56.7359	-9.62843	-40.9028	-7.56883	342.435
DBB12644	-7.20815	0.659768	82.8337	-98.4901	-11.1607	-41.8277	-7.20815	342.415
DBB12675	-7.59158	1.50201	-143.539	-76.3381	-11.9656	-42.2729	-7.59158	459.463
DBB12677	-7.83151	1.29933	-222.527	-116.995	-12.1813	-44.5539	-7.83151	473.446
DBB12845	-7.83487	2.02887	-116.172	-85.4199	-12.1178	-49.7824	-7.83487	457.447
DBB12848	-8.0502	1.34146	-133.513	-118.402	-12.4729	-43.0953	-8.0502	471.43
DBB12974	-7.62507	0.940008	-216.452	-87.8743	-12.2063	-46.3568	-7.62507	473.446
DBB12985	-7.9061	1.61019	-211.055	-76.518	-16.116	-51.0221	-7.9061	473.446
DBB12988	-8.18143	1.78561	-215.547	-83.0759	-12.4579	-48.595	-8.18143	472.462
DBB13002	-7.77164	2.68221	-146.21	-108.778	-12.5084	-43.357	-7.77164	459.463
DBB13044	-6.77723	2.07302	-27.1492	-62.2654	-9.82162	-36.2941	-6.44293	336.391
DBB13116	-7.16823	0.840067	13.9697	-69.0386	-9.7826	-38.1858	-7.16823	325.408
DBB13135	-7.32173	1.96308	-0.155429	-66.9518	-9.50723	-37.2039	-7.32173	325.408
DBB13317	-7.27886	1.02332	-19.2964	-62.861	-11.1816	-39.8721	-7.27886	355.39
DBB13483	-7.77479	1.54508	4.3878	-70.9915	-9.48879	-41.7129	-7.77479	378.469
DBB13536	-6.99938	1.47907	-45.2874	-66.3776	-10.2056	-34.5617	-6.99938	326.392
DBB13550	-7.20612	1.53006	-42.3061	-68.6373	-10.6559	-39.0134	-7.20612	312.409
DBB13565	-6.85261	1.72633	6.95186	-49.7119	-10.0919	-38.3507	-6.85261	299.458
DBB13569	-6.836	1.25168	50.6511	-59.5689	-8.77653	-35.6387	-6.836	346.423
DBB13716	-6.88299	1.67472	7.54111	-53.1069	-10.5659	-36.0872	-6.88299	321.376
DBB13793	-6.85819	1.78574	-25.493	-60.932	-10.0204	-36.754	-6.85819	328.408
DBB13805	-7.01027	3.27482	23.485	-70.2056	-10.8754	-39.47	-7.01027	337.375
DBB13825	-8.12851	3.01885	-137.241	-91.9454	-11.96	-52.9088	-8.12851	445.436
DBB13830	-6.98918	1.70033	-47.8121	-91.2852	-11.772	-38.7948	-6.98918	338.363
DBB13831	-7.07506	2.34415	-33.5351	-81.4035	-9.70239	-41.1608	-7.07506	322.364
DBB13839	-7.66451	1.89693	-128.114	-88.4476	-13.6888	-48.952	-7.66451	443.42
DBB13916	-7.55094	2.23261	-135.694	-82.2257	-11.8698	-40.26	-7.55094	445.436
DBB13917	-7.69076	2.03049	-145.993	-76.2125	-13.825	-39.3169	-7.69076	440.42
DBB13919	-7.39365	1.07449	-120.336	-75.7579	-13.6884	-44.7541	-7.39365	443.42
DBB13958	-7.03206	0.684828	-50.6483	-90.0498	-13.2819	-37.5301	-7.03206	306.365
DBB14051	-5.8765	1.14157	76.5178	-61.0708	-8.68782	-28.8425	-5.8765	306.365
DBB14117	-6.97163	1.16582	1.30763	-77.0994	-10.2251	-40.3969	-6.97163	359.809
DBB14118	-6.61293	0.844829	-19.2557	-85.1018	-9.84993	-37.142	-6.61293	325.364
DBB14163	-7.74117	1.40272	-127.099	-75.1242	-11.8299	-44.3135	-7.74117	441.404
DBB14180	-4.95374	1.25234	0.575198	-39.4441	-7.88123	-19.2529	-4.95374	150.177
DBB14287	-6.88006	1.43747	-54.6258	-61.6638	-9.98197	-36.3464	-6.88006	298.382
DBB14346	-6.18678	1.81608	35.9544	-59.3098	-9.06916	-30.3817	-6.18678	225.247
DBB14485	-5.58311	1.11643	-7.64384	-47.4392	-7.86893	-23.421	-5.58311	206.285
DBB14496	-6.37197	0.790167	-6.35982	-59.9979	-9.14093	-33.2206	-6.37197	307.349
DBB14512	-6.2815	1.27583	66.4199	-50.7757	-9.23672	-33.2387	-6.2815	314.429
DBB14677	-6.66696	2.37878	51.266	-63.1419	-9.21919	-37.3019	-6.66696	293.37
DBB14678	-6.89939	1.44941	-86.5889	-75.109	-9.30828	-34.8364	-6.89939	357.434
DBB1474	-7.7303	2.38089	-14.0675	-55.4063	-9.78339	-42.5077	-7.7303	398.635
DBB15017	-7.0457	2.69542	-38.9173	-46.133	-9.01721	-38.7919	-7.0457	305.418
DBB15079	-6.87387	2.06211	-56.0994	-86.7131	-11.2259	-37.6788	-6.87387	315.369
DBB15086	-6.83985	1.86604	-25.6269	-59.6226	-11.4848	-37.8785	-6.83985	329.352
DBB15253	-5.98322	2.01093	-8.30796	-59.4293	-9.43839	-30.3503	-5.98322	225.2
DBB15434	-6.31123	1.82572	-24.3439	-57.5144	-9.5746	-29.2406	-6.31123	283.327
DBB1548	-8.62491	1.93513	-74.3954	-106.79	-12.0344	-53.2779	-8.62491	571.639
DBB1549	-9.01218	2.42081	69.8799	-70.7913	-10.6588	-55.6202	-9.01218	504.628
DBB15647	-6.91943	2.52999	-25.503	-65.7113	-9.96745	-34.2879	-6.91943	293.407
DBB15649	-7.01002	1.59594	-45.6254	-48.9999	-9.05697	-38.1458	-7.01002	291.391
DBB15744	-6.79005	1.27528	106.769	-89.9285	-12.1365	-40.4382	-6.79005	308.293
DBB15928	-5.82354	1.35926	6.34661	-45.8881	-7.83102	-26.3111	-5.82354	206.285
DBB16004	-6.53956	2.65788	-15.3124	-64.3101	-10.0613	-35.0562	-6.53956	283.327
DBB16042	-6.93662	1.51137	-22.2055	-58.9968	-10.5103	-35.4943	-6.93662	293.407
DBB16230	-7.4638	1.00854	46.844	-89.0673	-10.8872	-43.4864	-7.4638	362.39
DBB16241	-5.4814	2.06433	-32.172	-43.3913	-7.5197	-24.4629	-5.4814	164.204
DBB16251	-5.61626	1.31333	21.6555	-46.565	-8.71698	-25.7933	-5.61626	178.231
DBB16255	-5.59266	1.31441	-53.3605	-46.4625	-8.59648	-26.7453	-5.59266	192.214
DBB16295	-6.70783	1.42347	65.3155	-75.6218	-10.7996	-32.7329	-6.70783	330.344
DBB16360	-6.84981	2.01789	70.7148	-63.4459	-10.1678	-36.3164	-6.84981	297.314
DBB16417	-5.69076	0.98117	-7.05109	-52.3934	-7.9815	-24.1573	-5.69076	192.258
DBB16429	-5.65667	1.53644	2.13952	-40.8764	-7.96689	-26.54	-5.65667	206.285
DBB16430	-6.28904	1.36363	-54.6935	-74.0809	-10.8538	-31.2509	-6.28904	283.283
DBB16540	-6.82979	1.63965	-21.8032	-68.0662	-9.34083	-35.1567	-6.82979	279.38
DBB16543	-6.72648	1.90256	-54.7596	-52.7833	-9.77023	-35.9127	-6.72648	277.364
DBB16828	-6.86703	1.42443	2.88242	-52.8985	-9.85999	-36.0013	-6.86703	279.38
DBB16900	-6.4672	1.65302	20.2481	-63.0719	-9.46921	-33.3884	-6.4672	271.316
DBB16914	-7.34127	1.93765	-86.9368	-83.1073	-9.99029	-46.1221	-7.34127	352.774
DBB16933	-6.29448	1.21856	2.66238	-63.2117	-9.32729	-32.6249	-6.29448	256.301
DBB16948	-7.12521	1.63276	-77.8832	-78.4128	-9.93973	-40.8185	-7.12521	352.774
DBB16996	-6.45711	2.50267	-64.4773	-75.341	-12.6208	-37.1598	-6.45711	283.283
DBB1701	-8.47969	2.36218	112.356	-85.8764	-10.4434	-50.2042	-8.47969	558.636
DBB17037	-6.82486	1.08345	-79.4576	-64.8282	-9.93874	-29.5213	-6.82486	303.318
DBB17114	-6.49092	2.1161	-84.3532	-78.4465	-9.64275	-37.6832	-6.49092	303.318
DBB17132	-7.10596	1.38954	-87.4386	-64.2906	-9.58932	-39.8311	-7.10596	292.335
DBB17529	-6.36752	0.964689	-23.8901	-61.9853	-9.46542	-32.476	-6.36752	234.339
DBB17840	-6.64483	0.804821	276.709	-51.8088	-9.08515	-37.3485	-6.64483	264.321
DBB18117	-6.73473	2.01953	2.0564	-73.7578	-9.03675	-34.6041	-6.50088	263.337
DBB18440	-6.39521	0.729364	1.58564	-80.1381	-11.2561	-33.685	-6.39521	244.265
DBB18441	-6.43983	0.741952	-0.649565	-54.0384	-10.2231	-34.1401	-6.43983	244.265
DBB18448	-6.56274	0.894621	30.0428	-64.3068	-9.68409	-34.0196	-6.56274	255.273
DBB18508	-6.21193	1.62356	-17.9605	-77.7418	-10.4763	-30.8936	-6.21193	241.29
DBB18566	-6.83807	1.13628	19.6932	-69.925	-10.0103	-38.7819	-6.83807	275.308
DBB18573	-6.48436	1.33994	31.9196	-88.1772	-11.0784	-35.132	-6.48436	262.309
DBB18574	-6.42965	1.32832	53.3876	-69.3119	-9.47649	-35.5837	-6.42965	262.309
DBB18622	-6.74038	1.51358	-94.8136	-84.247	-10.6012	-36.0258	-6.74038	314.305
DBB18650	-5.83227	1.1973	-1.11894	-68.9172	-9.1576	-29.1421	-5.83227	227.263
DBB18686	-5.88004	1.09115	-28.5875	-46.5408	-8.01864	-27.2003	-5.88004	220.312
DBB18711	-6.02136	1.10676	-114.763	-62.4368	-8.75093	-30.3587	-6.02136	242.231
DBB18741	-6.77501	1.36732	-108.364	-104.913	-10.8795	-40.2891	-6.77501	294.307
DBB18790	-6.18689	1.97525	-105.404	-94.7	-9.65489	-33.5037	-6.18689	288.212
DBB18939	-5.68149	1.37664	-21.0194	-47.3839	-9.11182	-28.0124	-5.68149	192.214
DBB18947	-6.14118	1.27412	-127.108	-63.4242	-9.18717	-33.5493	-6.14118	241.247
DBB18948	-6.41746	1.7155	-110.456	-63.2753	-8.64431	-34.1161	-6.41746	242.231
DBB18949	-5.90059	1.11932	-130.127	-65.9821	-8.68725	-29.1142	-5.90059	227.22
DBB18950	-6.05161	0.979303	-131.367	-65.9971	-8.55944	-28.2648	-6.05161	228.204
DBB18961	-6.46093	1.2606	-102.713	-76.1188	-9.89378	-35.6513	-6.46093	285.256
DBB19150	-5.74142	1.19344	36.2757	-42.6756	-8.25111	-26.5712	-5.74142	190.242
DBB19348	-6.31679	1.05304	31.5164	-56.2407	-8.51896	-29.8353	-6.31679	222.24
DBB194	-7.42961	1.30246	-21.3179	-87.4166	-11.5182	-42.1008	-7.42961	358.478
DBB19465	-4.83056	0.53819	22.0048	-41.7917	-6.69572	-21.678	-4.83056	123.155
DBB19606	-5.0754	1.28955	-152.147	-65.9976	-8.01477	-22.6898	-5.0754	178.191
DBB19618	-6.29878	1.76307	-41.1409	-79.7781	-9.76766	-36.9065	-6.29878	280.28
DBB19621	-5.73965	1.00417	-46.6909	-54.2447	-8.2374	-27.8657	-5.73965	202.257
DBB19651	-5.5086	2.13561	-17.085	-53.2502	-8.74489	-26.3957	-5.5086	193.202
DBB19680	-4.96962	0.499074	-34.4803	-58.3015	-7.05321	-18.8879	-4.96962	153.185
DBB19690	-6.26964	1.13755	-100.142	-74.8898	-10.4887	-34.0685	-6.26964	251.238
DBB19698	-6.16846	2.43401	-77.7495	-71.6324	-9.27484	-35.7556	-6.16846	264.281
DBB19715	-5.79067	1.81822	-40.5496	-76.1916	-9.14235	-34.428	-5.79067	226.236
DBB19716	-5.4975	1.74864	-55.9428	-55.0598	-8.99498	-22.2918	-5.4975	207.229
DBB19719	-5.9486	1.85552	-36.9274	-80.1719	-10.3595	-26.1859	-5.9486	240.263
DBB19720	-6.38895	3.40449	-65.6707	-77.4233	-9.36671	-34.6795	-6.38895	240.263
DBB19731	-6.7684	1.81881	-97.8324	-73.6664	-9.9468	-37.7034	-6.7684	268.273
DBB19732	-5.87764	2.74421	-37.8782	-67.2934	-9.25754	-32.0024	-5.87764	226.236
DBB19733	-6.19306	1.57123	-115.992	-96.7326	-9.89188	-37.309	-6.19306	251.238
DBB19734	-6.83194	1.01101	-31.3603	-88.0869	-10.5333	-36.5379	-6.83194	294.307
DBB19735	-5.37084	2.07926	-47.3858	-65.0275	-9.67538	-25.0257	-5.37084	197.194
DBB19736	-6.10904	3.03804	-35.639	-92.556	-9.52079	-34.177	-6.10904	226.236
DBB19769	-5.50598	0.97217	20.113	-42.8406	-8.06988	-24.2799	-5.50598	164.204
DBB19858	-5.43625	0.706468	-55.2297	-48.809	-8.37487	-20.2998	-5.43625	164.204
DBB20185	-6.60316	2.17601	-29.3345	-77.6903	-10.7648	-31.6656	-6.60316	294.307
DBB20248	-4.98537	0.84253	-43.7389	-57.1214	-8.44878	-27.0299	-4.98537	161.16
DBB20374	-5.02089	1.18048	8.32266	-62.0508	-10.21	-24.604	-5.02089	189.17
DBB20523	-5.83337	1.57446	78.3192	-73.8338	-9.33691	-26.636	-5.83337	248.286
DBB20576	-5.00873	1.13631	-171.088	-55.6224	-8.58839	-23.6308	-5.00873	156.097
DBB20616	-6.6901	1.47542	-84.3073	-80.2601	-12.1152	-36.8711	-6.6901	257.246
DBB21123	-5.62904	0.796048	-23.568	-52.7284	-8.73129	-29.3399	-5.62904	205.213
DBB21709	-5.44473	1.46404	-32.6691	-57.661	-9.90935	-24.121	-5.44473	195.174
DBB21712	-5.47665	0.445687	-94.0473	-62.2605	-10.4744	-28.0824	-5.47665	182.175
DBB21720	-5.38802	1.31593	-94.2087	-63.8226	-9.37614	-23.2962	-5.38802	182.175
DBB21778	-4.9787	2.09769	21.9255	-60.9826	-10.7965	-25.514	-4.9787	205.169
DBB21790	-6.31598	0.494603	22.3721	-59.3831	-10.2125	-31.808	-6.31598	241.246
DBB21795	-5.61812	0.613758	-64.4927	-55.6074	-8.97636	-27.5888	-5.61812	190.202
DBB21801	-6.27358	2.94875	-56.673	-64.4972	-9.65111	-31.7054	-6.27358	248.238
DBB21804	-6.08848	0.78949	-74.8546	-68.3891	-9.25683	-26.6056	-6.08848	218.256
DBB21815	-5.78509	1.65694	-58.8751	-56.6423	-9.67632	-29.3558	-5.78509	219.196
DBB21856	-6.26706	1.13986	-83.9403	-96.1357	-11.4595	-35.7674	-6.26706	281.264
DBB21857	-5.61496	1.176	-52.6276	-69.8649	-10.1326	-27.5154	-5.61496	209.201
DBB21882	-5.74964	3.18962	-77.6427	-68.5419	-9.46555	-28.9736	-5.74964	223.228
DBB21918	-6.20891	1.09449	-1.23925	-51.6972	-9.19043	-28.04	-6.20891	220.268
DBB21925	-6.17665	0.920742	2.33101	-63.0887	-9.92285	-29.365	-6.17665	254.282
DBB2423	-8.65376	2.93965	-0.598409	-43.0686	-9.8561	-49.0321	-8.65376	426.689
DBB2444	-8.76151	1.50229	18.5236	-107.127	-9.90432	-48.7784	-8.76151	555.632
DBB2455	-8.55667	2.99424	81.396	-48.4467	-10.3552	-52.5288	-8.55667	521.618
DBB258	-7.77667	2.20562	31.6825	-75.3108	-10.3056	-46.1119	-7.77667	448.394
DBB2649	-9.19927	1.11872	-1.04817	-68.2787	-10.2125	-53.17	-9.19927	619.788
DBB2650	-9.82553	2.69663	-8.85664	-71.4518	-10.6359	-60.0973	-9.82553	635.787
DBB2682	-10.0806	2.0583	-87.7117	-134.406	-9.93554	-66.624	-10.0806	631.687
DBB2790	-9.33973	1.19814	-55.5684	-106.259	-9.76439	-59.7969	-9.33973	596.709
DBB287	-7.04026	1.65916	42.0377	-71.112	-9.65972	-40.2327	-7.04026	394.423
DBB3381	-8.61035	1.58312	-3.71913	-54.6807	-8.30296	-50.8495	-8.61035	454.743
DBB3508	-9.31579	1.95608	14.633	-47.4691	-9.0407	-58.917	-9.31579	610.732
DBB3532	-8.83091	1.4415	163.117	-97.6888	-10.104	-43.3234	-8.83091	545.684
DBB3724	-8.80727	1.61169	2.95955	-57.7591	-9.78715	-43.8395	-8.80727	482.797
DBB3757	-9.25633	3.08641	40.817	-61.1983	-9.49005	-56.0278	-9.25633	571.678
DBB3940	-8.71015	2.75786	-2.14936	-54.9654	-8.25732	-47.2213	-8.71015	496.824
DBB4100	-9.01106	3.14981	-3.74473	-43.3158	-8.47621	-51.8517	-9.01106	510.851
DBB4117	-8.86246	1.2251	21.1804	-86.8331	-10.3225	-54.4616	-8.86246	610.715
DBB414	-7.75298	1.71001	-1.84269	-50.6171	-10.1615	-37.587	-7.75298	345.571
DBB4197	-10.3179	2.34514	-17.8578	-12.9212	-8.49971	-67.4478	-10.3179	739.831
DBB4298	-9.0255	1.75543	20.9702	-56.6758	-11.48	-49.8316	-9.0255	524.878
DBB4378	-9.47234	1.83656	-130.686	-89.0756	-11.2918	-61.305	-9.47234	718.816
DBB4438	-9.13014	2.23863	26.8187	-75.7774	-10.276	-48.9119	-9.13014	774.873
DBB4527	-9.06666	2.00734	6.90162	-37.7683	-8.26767	-53.7068	-9.06666	538.905
DBB4722	-8.40305	1.18558	115.809	-82.5803	-10.741	-50.623	-8.40305	712.808
DBB5090	-10.3985	2.58571	12.3048	-81.9851	-8.68037	-58.9362	-10.3985	833.021
DBB5126	-9.68219	2.18026	20.5607	-76.0339	-10.597	-56.1458	-9.68219	795.891
DBB5373	-11.227	2.46014	-170.265	-84.5643	-10.012	-71.8878	-11.227	875.949
DBB5448	-9.53676	1.62855	20.4789	-60.0564	-8.56147	-55.8298	-9.53676	592.997
DBB5554	-10.8906	1.99449	23.7233	-72.7811	-9.29603	-68.5248	-10.8906	774.92
DBB5697	-11.1519	2.75018	20.6358	-56.2065	-9.21109	-72.9714	-11.1519	847.999
DBB5698	-9.94562	2.25611	-152.477	-78.2611	-13.6035	-67.0157	-9.94562	937.11
DBB5793	-10.3193	2.83798	-104.644	-105.856	-11.6526	-66.6144	-10.3193	897.94
DBB604	-7.56567	2.24474	28.3077	-78.4132	-10.114	-39.3488	-7.56567	383.532
DBB6260	-9.19725	2.1811	-2.96162	-58.385	-11.6994	-54.3894	-9.19725	873.921
DBB6281	-9.71073	2.66771	10.8358	-92.3884	-9.2284	-57.2135	-9.71073	822.021
DBB6621	-10.0072	2.54884	-205.088	-63.4334	-10.765	-67.5309	-10.0072	1007.21
DBB7131	-12.064	3.29307	-0.422894	-104.513	-11.0103	-72.9839	-12.064	896.959
DBB7393	-10.7196	2.31315	-407.321	-124.592	-11.3185	-68.5948	-10.7196	1028.18
DBB8083	-10.7064	2.54197	-192.734	-86.63	-9.76156	-70.5477	-10.7064	931.109
DBB8084	-10.9978	2.62087	-243.135	-51.2548	-8.06149	-72.8587	-10.9978	1056.24
DBB8351	-11.166	2.16973	-300.102	-51.3317	-7.42889	-68.9517	-11.166	981.17
DBB8912	-11.0266	2.58225	-375.277	-90.3004	-7.19949	-72.5481	-11.0266	1040.24
DBB8933	-11.6818	2.49221	-307.262	-102.029	-9.97892	-76.5759	-11.6818	1082.09
DBB9251	-11.3904	2.52528	-196.115	-118.779	-10.8672	-71.9262	-11.3904	964.046
DBB9450	-10.919	2.55929	-262.933	-90.2621	-8.23262	-67.8447	-10.919	1046.2
DBB9451	-11.247	3.61433	-317.052	-73.6651	-8.08766	-81.7313	-11.247	1060.23
DBB9622	-10.8754	3.07392	-331.353	-76.6485	-7.92592	-71.3626	-10.8754	1076.23
DBB9626	-10.323	2.71312	-418.214	-72.3795	-9.32512	-65.9473	-10.323	1059.24
DBB9867	-11.2856	3.16029	-166.671	-83.0597	-9.73363	-69.8753	-11.2856	1132.31
DBB9961	-11.0589	2.72062	-495.46	-61.0539	-9.443	-74.4233	-11.0589	1184.37
DCM100585	-6.85435	1.42323	1.54912	-114.212	-10.537	-33.5039	-6.85435	297.354
DCM100767	-8.32258	1.53216	1.67407	-99.6431	-10.5304	-46.8876	-8.32258	440.54
DCM101079	-8.47179	1.54304	-5.91116	-115.16	-11.2421	-47.5491	-8.47179	489.573
DCM101081	-8.52346	2.36824	-69.2523	-88.3291	-10.2975	-51.3211	-8.52346	523.63
DCM101256	-7.88258	2.26616	84.474	-59.5204	-9.63431	-44.8519	-7.88258	415.509
DCM101792	-7.88078	1.53555	26.4587	-80.2809	-11.1557	-43.1945	-7.88078	435.589
DCM102547	-8.28981	1.78076	-10.7276	-66.3935	-7.94792	-50.2019	-8.28981	550.671
DCM102551	-7.69552	1.97404	-36.1676	-99.0085	-10.0563	-41.8618	-7.69552	524.633
DCM102556	-8.811	2.01921	-42.9115	-63.5718	-9.47216	-44.5582	-8.811	542.673
DCM102568	-9.61259	2.01493	61.3877	-75.8034	-10.3911	-58.5463	-9.61259	611.696
DCM102570	-8.48211	1.23035	52.3252	-69.2905	-10.5726	-47.9413	-8.48211	515.654
DCM102579	-9.24449	1.55382	-3.02198	-69.5954	-9.51978	-51.4086	-9.24449	596.705
DCM102581	-9.28204	2.06926	-43.2613	-106.543	-12.21	-54.3739	-9.28204	630.79
DCM102583	-8.61584	1.08615	-106.093	-90.9282	-9.82415	-45.6076	-8.61584	511.623
DCM102610	-9.91748	2.23276	-26.2004	-42.6521	-10.2654	-58.617	-9.91748	662.803
DCM102611	-9.17091	2.31833	19.3958	-83.3918	-8.84649	-55.3726	-9.17091	630.786
DCM102617	-8.5877	2.61399	-1.66637	-82.165	-9.81269	-48.7569	-8.5877	636.712
DCM102624	-8.703	2.02661	0.436928	-56.1001	-9.02618	-42.8718	-8.703	660.812
DCM102625	-8.56641	2.26685	-14.5646	-110.175	-11.6252	-55.3718	-8.56641	685.693
DCM102767	-8.7163	1.42235	-67.2192	-105.979	-12.0598	-48.5198	-8.7163	525.649
DCM102768	-8.30221	2.41794	-60.0181	-72.8939	-9.37965	-43.6896	-8.30221	499.611
DCM102814	-9.71952	1.52067	90.3408	-93.2774	-10.3712	-61.3338	-9.71952	645.797
DCM103705	-5.61251	1.09461	-42.4797	-62.4617	-9.00947	-25.9844	-5.61251	193.21
DCM10397	-8.11299	2.41005	74.9468	-68.0619	-10.531	-46.5277	-8.11299	369.396
DCM104065	-5.74546	1.11977	-32.6305	-67.0893	-9.9104	-31.6006	-5.74546	227.227
DCM104377	-6.55131	0.812007	-16.7642	-59.0752	-8.9876	-30.532	-6.55131	249.329
DCM10478	-7.63099	1.64416	-40.4867	-72.6893	-11.8858	-40.2057	-7.63099	405.451
DCM10517	-8.68457	2.6203	13.779	-63.8488	-10.7767	-50.3902	-8.68457	505.612
DCM105230	-7.69709	2.32342	92.872	-53.669	-9.39307	-42.9871	-7.69709	358.462
DCM105452	-6.27139	1.21382	-16.529	-64.7399	-9.39443	-29.0734	-6.27139	294.329
DCM105604	-6.89517	1.58779	-6.72795	-66.0504	-10.0789	-34.6805	-6.89517	271.364
DCM105893	-7.04178	1.72894	-58.5189	-66.4456	-10.3768	-40.6951	-7.04178	389.761
DCM10630	-8.56901	1.21341	11.1601	-81.5902	-10.8183	-48.7518	-8.56901	491.585
DCM106485	-7.72214	2.96506	-11.4651	-99.0338	-11.1474	-46.4554	-7.72214	388.423
DCM106505	-7.12736	1.35326	-78.3135	-82.0533	-9.36718	-36.6762	-7.12736	359.469
DCM106523	-6.6464	1.9361	83.1597	-60.1077	-8.96094	-32.6843	-6.6464	290.363
DCM106536	-6.52979	0.86276	-11.8579	-50.4239	-9.24754	-32.0043	-6.52979	271.335
DCM106662	-6.79838	3.27691	-8.30796	-65.3444	-9.70531	-38.4254	-6.79838	275.348
DCM106741	-7.57517	1.73916	-131.571	-89.7808	-10.2928	-42.0333	-7.57517	395.443
DCM107015	-9.12639	2.29609	24.7861	-98.7108	-11.3812	-58.2449	-9.12639	543.624
DCM107080	-9.20885	1.68116	-93.6093	-53.9054	-10.0104	-52.6946	-9.20885	550.656
DCM1071	-7.5292	1.31756	-15.6896	-64.8246	-9.97355	-37.9491	-7.5292	391.471
DCM107126	-9.24586	1.03784	-145.845	-73.52	-11.5512	-57.1025	-9.24586	512.607
DCM107128	-8.91745	1.27754	-36.8035	-100.777	-9.40708	-48.5778	-8.91745	513.591
DCM107142	-8.32802	1.51094	-71.7197	-105.714	-11.3676	-52.8872	-8.32802	547.629
DCM107184	-7.862	1.66669	-80.6884	-50.055	-9.02934	-40.736	-7.862	400.523
DCM107328	-7.73395	1.33565	-52.5256	-57.7348	-10.061	-42.1467	-7.73395	362.426
DCM107408	-6.2606	1.06891	-13.1607	-69.7291	-9.33543	-33.7617	-6.2606	297.333
DCM108061	-7.80083	1.52117	-39.726	-86.6949	-9.57874	-44.1088	-7.80083	391.899
DCM108385	-7.17746	1.77362	-56.8834	-76.831	-10.3981	-30.8295	-7.17746	335.791
DCM108903	-7.28328	1.60881	99.0641	-57.8079	-9.37976	-41.3237	-7.28328	360.454
DCM108925	-7.07071	1.39321	-83.5188	-77.1329	-9.16513	-39.1771	-7.07071	353.378
DCM109307	-8.0851	2.10305	-71.4145	-65.1023	-11.0797	-44.0146	-8.0851	368.389
DCM109524	-6.19679	1.53088	83.4995	-51.4434	-8.30795	-28.7546	-6.19679	250.729
DCM109854	-8.59051	2.62845	43.4618	-88.292	-7.97861	-50.4365	-8.59051	509.559
DCM109962	-7.52761	1.41782	93.7276	-75.1825	-10.0931	-41.8288	-7.52761	362.426
DCM110206	-7.47406	1.94104	-32.0651	-102.5	-10.2825	-42.6768	-7.47406	440.452
DCM110208	-9.02158	2.11213	-91.2974	-72.437	-9.43127	-51.0886	-9.02158	550.721
DCM110214	-9.21481	2.0379	-1.85464	-74.6218	-9.88604	-57.7826	-9.21481	531.63
DCM110215	-8.43963	3.22495	-22.168	-97.2875	-9.68494	-53.5507	-8.43963	543.685
DCM110932	-8.23465	2.20654	-92.8958	-69.6835	-9.8617	-46.9558	-8.23465	488.652
DCM111002	-7.50132	2.26544	-95.1651	-75.5598	-10.1671	-40.7659	-7.50132	433.915
DCM111131	-8.27564	1.48044	3.29402	-66.57	-10.5668	-47.0952	-8.27564	382.891
DCM111646	-9.42498	2.96356	-56.9157	-152.737	-10.4254	-54.5396	-9.42498	570.727
DCM111656	-8.4181	1.82617	-101.193	-66.7957	-10.3627	-50.8122	-8.4181	516.635
DCM111680	-9.00772	2.32857	-41.5758	-76.3737	-9.50127	-51.9671	-9.00772	574.678
DCM111688	-8.88541	1.41593	-10.6596	-115.969	-11.1143	-52.3862	-8.88541	612.649
DCM111689	-8.75139	1.84679	-21.1529	-101.473	-11.1069	-54.9928	-8.75139	588.661
DCM111691	-9.36235	1.40506	-136.867	-78.2355	-10.6326	-54.4933	-9.36235	541.649
DCM111724	-9.50017	1.74318	-13.2932	-67.6496	-10.9775	-44.0042	-9.50017	582.786
DCM111767	-8.66172	1.3034	-26.7217	-43.4852	-9.49441	-49.5785	-8.66172	640.785
DCM111769	-8.9099	1.59263	3.4646	-68.5626	-11.2639	-55.6544	-8.9099	641.725
DCM111793	-7.92666	2.32121	-30.0973	-64.2025	-10.1502	-46.6653	-7.92666	389.496
DCM11183	-8.06655	1.48477	-52.6087	-74.6362	-9.51618	-41.5304	-8.06655	510.606
DCM111831	-9.25749	2.78119	264.736	-57.4842	-9.41724	-55.7658	-9.25749	635.894
DCM11184	-7.77433	2.62956	-11.913	-70.0144	-8.82057	-40.4985	-7.77433	428.529
DCM11186	-8.82928	1.84251	-46.4215	-76.8594	-9.28163	-46.0557	-8.82928	542.673
DCM111879	-9.51738	2.04664	39.863	-67.2513	-10.5108	-57.8784	-9.51738	492.62
DCM111886	-8.57092	2.7996	-71.5718	-93.8746	-10.7347	-52.7822	-8.57092	434.54
DCM111921	-8.21745	2.14115	-23.9522	-72.7739	-10.4248	-46.3164	-8.21745	512.626
DCM11194	-7.13024	1.68715	-9.40795	-56.6073	-9.99961	-41.5443	-7.13024	456.583
DCM111940	-9.56216	2.06577	49.0727	-43.5338	-8.78869	-58.0738	-9.56216	645.841
DCM11198	-9.18261	1.81888	23.4056	-88.1554	-8.799	-58.0862	-9.18261	665.787
DCM11203	-8.27762	2.56586	-67.9452	-85.7429	-9.04759	-49.6055	-8.27762	510.635
DCM11222	-8.39622	2.39653	-131.821	-73.0239	-9.62958	-48.6843	-8.39622	541.649
DCM112277	-8.85961	2.13793	-114.871	-69.2629	-9.63338	-49.8256	-8.85961	499.696
DCM112282	-9.47017	2.3999	241.959	-56.8184	-8.95052	-57.4739	-9.47017	727.906
DCM11256	-9.04848	2.94841	-13.8026	-48.0869	-8.68879	-52.4235	-9.04848	636.834
DCM11292	-9.84605	1.43658	-51.877	-116.224	-10.3858	-58.013	-9.84605	686.85
DCM11349	-7.87989	2.40893	-31.4025	-86.9256	-9.39701	-42.4794	-7.87989	410.489
DCM11404	-8.89064	2.45547	38.3711	-60.6952	-9.88599	-53.3403	-8.89064	502.615
DCM11416	-8.94826	3.24398	-122.355	-67.938	-9.37378	-53.9277	-8.94826	518.702
DCM11434	-8.91475	1.21019	15.6084	-55.9863	-10.0808	-43.9109	-8.91475	560.739
DCM11470	-8.8335	2.43831	-59.8524	-62.4988	-9.82104	-45.043	-8.8335	453.627
DCM11492	-9.06109	1.8397	-72.6018	-70.3975	-9.44632	-47.8268	-9.06109	551.731
DCM115688	-6.89012	1.42444	-33.3789	-74.6873	-9.02758	-33.9523	-6.89012	335.791
DCM116004	-9.43576	3.36315	120.695	-119.111	-12.4633	-59.8298	-9.43576	535.597
DCM116068	-7.90655	2.15585	-71.6896	-74.9225	-10.6587	-49.0759	-7.90655	447.531
DCM116147	-7.60354	1.90852	-91.6328	-73.8818	-9.69971	-41.6337	-7.60354	436.512
DCM116339	-7.19931	1.85535	-60.0762	-55.1232	-9.5451	-37.3688	-7.19931	408.296
DCM116476	-7.72651	2.79173	12.8352	-71.693	-10.929	-44.9359	-7.72651	416.542
DCM116718	-7.18448	2.35626	-43.9274	-53.4716	-9.20293	-39.7393	-7.18448	375.493
DCM116923	-7.69023	1.78302	-69.3806	-59.8	-9.95551	-45.9416	-7.69023	404.491
DCM117144	-7.42421	3.63572	-78.9039	-77.8238	-10.2186	-42.9482	-7.42421	380.444
DCM117957	-7.44323	1.0839	1.11654	-82.4651	-10.7409	-42.3314	-7.44323	407.535
DCM118111	-7.85421	1.55509	11.4778	-66.4396	-9.27956	-44.1572	-7.85421	400.543
DCM11820	-9.28024	1.66924	-145.855	-117.926	-9.04859	-49.285	-9.28024	525.694
DCM118269	-7.42955	1.02506	23.6718	-75.1628	-11.0755	-33.387	-7.42955	331.372
DCM118920	-7.66701	1.25313	-34.4689	-67.3411	-10.075	-38.5417	-7.66701	369.489
DCM119142	-8.71178	2.87999	-47.2231	-79.3081	-10.2105	-55.1375	-8.71178	509.603
DCM119143	-8.61048	1.48997	-121.958	-100.306	-9.80557	-50.2917	-8.61048	532.638
DCM119144	-8.41023	1.52147	-68.3693	-107.025	-10.8307	-49.087	-8.41023	562.667
DCM119341	-8.94559	1.19531	-50.2719	-102.607	-10.4048	-52.4747	-8.94559	443.588
DCM119353	-8.19014	2.69897	-86.0072	-69.7056	-10.8001	-47.0924	-8.19014	473.55
DCM119745	-7.40932	4.2092	-144.949	-74.425	-9.39122	-42.8188	-7.40932	359.47
DCM119973	-8.57609	1.59848	5.1893	-87.4218	-10.1501	-51.159	-8.57609	430.573
DCM119988	-7.75719	1.96983	-94.7891	-54.5285	-9.57103	-45.508	-7.75719	369.44
DCM120016	-7.38989	1.93935	-21.6662	-49.4853	-9.65815	-39.61	-7.38989	359.401
DCM120026	-8.74993	3.13019	-5.11153	-67.8494	-10.2474	-51.6087	-8.74993	475.586
DCM120044	-8.31561	1.37405	-89.1751	-96.8233	-9.41735	-46.498	-8.31561	502.679
DCM120505	-8.8793	1.44313	-134.486	-103.339	-10.4122	-57.1497	-8.8793	523.589
DCM120617	-9.20877	2.02998	2.03412	-79.4341	-9.34802	-46.8507	-9.20877	550.671
DCM120619	-8.73366	2.14163	-54.8198	-56.4959	-9.35691	-49.5193	-8.73366	542.673
DCM120625	-9.14377	5.10869	3.47482	-70.9017	-9.51768	-59.3859	-9.14377	665.787
DCM120642	-8.7578	1.80553	-59.2174	-81.1466	-10.4196	-49.8369	-8.7578	544.652
DCM120705	-9.00095	1.96092	5.91425	-115.004	-11.5203	-49.003	-9.00095	665.75
DCM120792	-8.75275	1.6781	-105.319	-99.2596	-12.2747	-45.7472	-8.75275	475.633
DCM120854	-8.0787	1.82452	-60.1606	-88.8242	-9.94464	-44.2909	-8.0787	411.546
DCM120855	-8.15656	1.68681	-44.302	-76.2353	-9.61956	-49.5289	-8.15656	414.55
DCM120927	-8.50278	1.9206	-135.609	-85.6009	-10.61	-50.5098	-8.50278	581.757
DCM121058	-6.70461	1.10768	18.8241	-69.9328	-11.0871	-33.8522	-6.70461	377.341
DCM121215	-7.06285	1.44303	-31.8346	-73.5574	-9.75164	-41.579	-7.06285	372.512
DCM121306	-8.35636	2.16438	-89.1573	-72.3331	-10.314	-42.7947	-8.35636	425.573
DCM121309	-8.62582	1.53163	-123.852	-103.338	-10.5472	-48.3458	-8.62582	569.721
DCM121905	-8.75821	1.71269	64.4717	-98.0701	-9.61154	-48.5397	-8.75821	492.576
DCM122034	-8.88112	2.30778	-81.6843	-57.4556	-9.13253	-56.2771	-8.88112	489.613
DCM122070	-6.39388	0.595307	-27.5851	-59.4034	-10.2825	-28.0875	-6.39388	301.325
DCM123088	-7.11968	1.36979	-27.4631	-70.6359	-10.9241	-38.5817	-7.11968	370.88
DCM1231	-6.31363	1.64151	3.38266	-60.4466	-9.64544	-31.3762	-6.31363	276.723
DCM12339	-6.65901	0.762931	-22.3955	-65.2244	-11.3623	-33.461	-6.65901	283.291
DCM123458	-6.81703	2.0722	92.3025	-59.1262	-9.26015	-37.4534	-6.81703	332.4
DCM123539	-5.99318	1.26333	-201.129	-59.7751	-8.58876	-30.7238	-5.99318	211.221
DCM123762	-7.92707	1.25784	79.1556	-71.3133	-9.83223	-42.9795	-7.92707	412.442
DCM1239	-6.55641	2.03083	-209.544	-59.9828	-9.30889	-36.3494	-6.55641	293.71
DCM124462	-6.88308	1.73642	-22.7965	-60.5845	-9.80231	-41.0757	-6.88308	287.315
DCM124534	-7.33665	1.1077	-61.4647	-73.2275	-9.74626	-42.993	-7.33665	350.418
DCM124986	-10.0604	2.41875	-44.655	-112.662	-9.09818	-63.2812	-10.0604	583.709
DCM12522	-7.09093	2.24668	-25.9414	-58.5093	-8.92582	-37.9991	-7.09093	306.362
DCM125230	-8.36337	1.64781	-169.063	-68.2562	-9.58724	-45.923	-8.36337	395.568
DCM125797	-6.89507	1.41849	78.2063	-74.0768	-9.74941	-34.2647	-6.89507	302.418
DCM125972	-7.1617	1.18468	-55.2285	-60.0169	-9.76263	-38.0579	-7.1617	345.467
DCM126140	-7.59484	1.11002	16.5993	-61.0759	-10.6512	-40.6489	-7.59484	340.423
DCM126456	-7.28234	1.10532	-39.5013	-72.5172	-9.28111	-36.733	-7.28234	422.323
DCM126555	-7.22197	1.10717	-4.14589	-70.364	-9.70029	-39.7335	-7.22197	317.429
DCM126982	-6.26883	1.45721	5.12326	-66.2636	-9.68608	-29.4323	-6.26883	282.318
DCM127471	-8.41763	1.40731	199.186	-74.0764	-9.55894	-42.9315	-8.41763	437.584
DCM127745	-7.36904	1.0026	34.012	-80.7981	-9.89424	-42.1478	-7.36904	387.459
DCM127982	-7.46012	2.53049	4.68582	-59.4788	-9.31116	-42.8386	-7.46012	404.507
DCM128167	-7.67377	1.96529	23.9183	-68.1501	-10.7094	-42.3182	-7.67377	346.427
DCM128220	-8.68438	1.82354	-4.11397	-82.4682	-11.6084	-52.7567	-8.68438	478.658
DCM128225	-8.87553	1.31331	-87.1883	-102.037	-10.8447	-55.0448	-8.87553	580.706
DCM128922	-8.77879	1.48292	-21.7207	-96.6356	-9.47944	-53.3045	-8.77879	533.666
DCM129628	-9.20066	2.32294	-16.444	-128.182	-10.7826	-45.7844	-9.20066	570.727
DCM129636	-8.38797	3.11252	-49.0527	-65.0757	-9.95074	-40.7749	-8.38797	542.673
DCM129644	-8.56433	1.61508	-68.4196	-58.8096	-9.01115	-51.8669	-8.56433	542.673
DCM129654	-9.36642	2.81065	-41.7639	-100.9	-9.88157	-61.6927	-9.36642	588.661
DCM129663	-8.75404	1.7815	-78.0129	-106.742	-9.30043	-43.4992	-8.75404	570.653
DCM129665	-8.96175	2.21334	-36.3898	-109.415	-10.4512	-52.33	-8.96175	550.7
DCM129668	-8.58979	3.33037	-120.275	-63.0399	-9.6759	-52.3537	-8.58979	541.649
DCM129712	-8.79557	1.57924	35.3617	-85.6786	-8.9858	-51.4104	-8.79557	635.846
DCM129859	-9.26543	2.23051	35.6796	-51.694	-10.1171	-59.8524	-9.26543	518.614
DCM129869	-9.1044	1.97285	-90.5749	-69.2951	-9.15245	-58.602	-9.1044	519.686
DCM129910	-8.91442	2.11634	-13.8081	-80.9192	-9.40752	-52.9801	-8.91442	650.783
DCM129923	-8.85968	4.00899	-112.1	-52.9282	-9.32499	-46.8604	-8.85968	483.697
DCM130132	-6.87677	1.42382	28.4083	-71.7836	-9.89824	-37.4783	-6.87677	342.361
DCM130317	-8.86799	3.41903	-109.004	-79.1146	-9.88926	-52.8323	-8.86799	470.658
DCM130382	-7.87829	2.31511	32.947	-70.2576	-10.0428	-43.4036	-7.87829	376.544
DCM130776	-7.3244	1.57947	-76.7752	-55.8836	-9.50112	-40.4513	-7.3244	321.764
DCM130786	-6.74191	1.64778	-60.1258	-68.579	-10.2256	-33.6523	-6.74191	322.364
DCM130893	-7.43361	1.8015	18.7621	-58.5609	-10.5412	-38.4787	-7.43361	316.445
DCM131519	-9.51727	2.23484	4.83979	-79.8431	-12.3207	-58.2289	-9.51727	479.574
DCM131653	-9.34462	1.73506	-60.1849	-58.2831	-10.1891	-51.2776	-9.34462	532.685
DCM131779	-8.04837	2.81493	-100.631	-54.7726	-9.8058	-46.484	-8.04837	507.652
DCM131780	-8.47924	2.65277	-65.0581	-56.7704	-9.99345	-44.0586	-8.47924	505.612
DCM131781	-8.00929	1.08743	-51.2373	-83.9757	-11.5431	-43.4975	-8.00929	475.586
DCM131782	-7.0711	1.78083	-5.17108	-74.819	-9.23569	-34.4252	-7.0711	333.388
DCM131783	-7.72481	2.13286	-100.126	-113.602	-10.7624	-43.8809	-7.72481	447.532
DCM131967	-6.68077	2.24386	-159.285	-80.8122	-9.52793	-35.356	-6.68077	279.336
DCM132655	-7.1287	1.05647	-87.5933	-78.4893	-10.3319	-39.1433	-7.1287	311.402
DCM132728	-7.02882	1.65151	-90.6027	-67.6974	-11.1472	-37.9438	-7.02882	311.402
DCM133150	-7.00573	1.41812	-42.831	-59.3049	-9.82201	-34.6918	-7.00573	265.309
DCM133197	-7.59284	1.78282	-40.7983	-57.7603	-10.1875	-38.8223	-7.59284	336.476
DCM133239	-7.00696	1.4169	-42.8467	-59.3049	-9.82201	-34.6754	-7.00696	265.309
DCM133405	-6.46011	1.14654	-52.8984	-66.8923	-9.47651	-32.4012	-6.46011	252.27
DCM134950	-8.84508	2.54686	85.999	-73.2686	-10.7832	-53.6791	-8.84508	606.767
DCM135396	-7.52812	1.28814	33.4711	-79.7432	-9.91988	-42.989	-7.52812	424.905
DCM135447	-9.24262	2.29028	-99.251	-105.279	-8.99432	-61.4198	-9.24262	536.673
DCM136080	-6.88409	1.9896	-17.8089	-62.7367	-9.2872	-36.0749	-6.88409	281.399
DCM136090	-9.13296	1.98946	-82.164	-60.8967	-10.3843	-57.5584	-9.13296	521.679
DCM136196	-7.99893	1.63423	-60.0185	-75.8243	-10.9339	-46.5603	-7.99893	417.513
DCM136998	-7.5558	3.5535	-7.45915	-54.4844	-10.6846	-44.2128	-7.5558	396.443
DCM137295	-6.66837	1.35601	-14.6336	-55.2045	-9.19586	-37.9865	-6.66837	313.788
DCM137409	-9.36467	1.93663	-94.5497	-108.928	-9.76433	-58.0707	-9.36467	546.665
DCM137482	-8.16022	2.02345	24.7737	-80.7784	-10.4075	-48.0683	-8.16022	431.54
DCM138166	-7.23467	1.07215	-4.2386	-52.5516	-11.0035	-34.0576	-7.23467	365.351
DCM138630	-6.31026	1.3837	-13.2568	-69.0818	-9.58097	-34.6506	-6.31026	269.279
DCM138633	-6.74135	1.15398	-20.0951	-62.518	-9.86618	-31.2972	-6.74135	297.333
DCM138767	-8.63313	3.33499	-112.068	-130.845	-9.50968	-45.8691	-8.63313	505.568
DCM138768	-8.36009	3.0179	-143.962	-148.333	-12.007	-47.152	-8.36009	490.557
DCM138770	-8.60576	1.61681	-80.9716	-83.3817	-11.8111	-49.5922	-8.60576	447.532
DCM138772	-7.47304	3.84635	0.817342	-86.5756	-10.8422	-42.6657	-7.47304	389.496
DCM138773	-8.41618	2.64962	-74.8407	-61.4752	-9.46893	-45.2307	-8.41618	493.625
DCM138775	-8.36461	1.56228	-91.1667	-53.2936	-10.0888	-46.2279	-8.36461	490.557
DCM14135	-7.63023	1.83871	16.3517	-56.4959	-10.3088	-41.6901	-7.63023	358.413
DCM15251	-7.91632	2.34346	22.4255	-59.8901	-9.75465	-44.4244	-7.91632	344.411
DCM15692	-8.42569	4.65594	52.9996	-76.4449	-9.56299	-49.4139	-8.42569	488.588
DCM15835	-7.8041	1.50272	-48.2082	-94.0358	-9.51671	-46.6558	-7.8041	432.521
DCM15926	-7.92415	1.58504	38.7217	-75.6904	-8.39797	-46.5087	-7.92415	406.435
DCM15992	-8.69724	1.50704	128.606	-102.421	-9.91379	-52.62	-8.69724	601.7
DCM16070	-7.3196	1.66586	-146.475	-47.3759	-9.47389	-38.9128	-7.3196	369.461
DCM1641	-7.07197	1.11465	-102.764	-59.3536	-10.7101	-33.1183	-7.07197	331.322
DCM16704	-7.26776	2.13756	-55.569	-81.1584	-9.53817	-40.84	-7.26776	380.492
DCM1693	-7.00835	1.21959	-29.3344	-70.5946	-10.0529	-42.1295	-7.00835	309.344
DCM17142	-7.89426	1.07345	53.9966	-59.7369	-11.7472	-43.4644	-7.89426	409.558
DCM173	-8.11143	1.67779	-0.584755	-63.915	-11.0124	-38.902	-8.11143	394.515
DCM1734	-8.5355	2.09269	36.9718	-68.3256	-8.64343	-54.8111	-8.5355	543.685
DCM17549	-6.87516	1.08826	15.7646	-66.4429	-9.70022	-36.8447	-6.87516	276.38
DCM17562	-7.88694	1.74475	-162.393	-96.1633	-9.33497	-45.0857	-7.88694	452.555
DCM17563	-8.35716	1.859	-137.684	-46.8522	-9.61937	-47.874	-8.35716	482.581
DCM17867	-8.43015	1.73495	-71.0708	-57.8037	-9.62065	-46.8735	-8.43015	429.561
DCM17924	-6.46668	2.31925	-73.019	-63.1582	-10.3382	-35.6857	-6.46668	296.301
DCM18339	-6.24338	1.55084	-50.1198	-61.3105	-9.23929	-33.5728	-6.24338	257.308
DCM18340	-7.74722	0.897227	43.979	-94.863	-10.9377	-41.5512	-7.74722	382.528
DCM18430	-7.35029	0.847852	-39.1276	-65.1745	-9.4999	-41.5195	-7.35029	317.385
DCM18438	-6.82733	1.50685	-21.8054	-83.1645	-10.3067	-39.251	-6.82733	315.393
DCM18596	-8.52503	2.30398	-39.908	-63.699	-9.73177	-48.4124	-8.52503	463.531
DCM18745	-6.61401	2.13274	-23.8615	-71.0617	-11.2582	-36.9154	-6.61401	299.326
DCM18767	-7.7095	1.40315	3.69683	-69.762	-10.2652	-42.4037	-7.7095	379.46
DCM18900	-7.7467	1.50716	28.5123	-53.7714	-9.25974	-44.844	-7.7467	440.486
DCM18934	-9.00349	2.24576	-85.7902	-76.231	-11.6162	-53.2461	-9.00349	517.667
DCM19009	-8.07895	2.31348	6.99973	-83.2297	-9.8691	-45.6973	-8.07895	444.531
DCM19037	-6.65996	1.28323	-45.5099	-52.6315	-9.72717	-34.8185	-6.65996	326.318
DCM1911	-7.38849	1.96821	62.2546	-59.2961	-10.2309	-43.8869	-7.38849	376.453
DCM193	-9.12632	2.14748	-75.9729	-70.3743	-9.98427	-57.8822	-9.12632	562.667
DCM1943	-8.28571	2.19734	1.01801	-63.6221	-8.74331	-49.0209	-8.28571	520.586
DCM19604	-9.10284	2.27515	-118.241	-88.8405	-10.2806	-51.8313	-9.10284	525.69
DCM19640	-8.03564	1.83999	-73.7622	-64.3065	-10.0439	-47.3151	-8.03564	426.581
DCM19642	-8.64016	1.69244	-22.6635	-81.2768	-9.98602	-49.732	-8.64016	507.628
DCM20352	-8.15039	1.37	17.6853	-81.612	-9.91623	-44.944	-8.15039	550.671
DCM20357	-8.4405	1.41722	-62.9564	-96.9928	-11.1194	-49.3073	-8.4405	542.673
DCM20359	-7.66378	2.24932	-91.543	-62.5053	-10.2189	-45.5861	-7.66378	516.635
DCM20364	-8.45068	1.49619	-68.8051	-70.4723	-11.0137	-50.5647	-8.45068	502.608
DCM20374	-8.95553	2.44566	-47.488	-82.2805	-11.0779	-53.7233	-8.95553	502.656
DCM20394	-9.0243	2.06472	-100.897	-87.6617	-11.3029	-56.7404	-9.0243	530.626
DCM20395	-9.21106	1.84426	-60.8746	-78.5056	-9.69579	-51.4205	-9.21106	532.662
DCM20399	-9.53013	1.82354	62.8929	-39.5616	-10.0788	-55.4665	-9.53013	595.717
DCM20401	-8.14689	1.45339	-38.5265	-70.5291	-10.9477	-47.7879	-8.14689	538.645
DCM20430	-8.99513	2.30463	-28.145	-90.3604	-8.61857	-54.1556	-8.99513	642.882
DCM20466	-10.1653	1.27264	-98.2531	-100.079	-10.8521	-59.6355	-10.1653	692.857
DCM20496	-8.93393	2.28784	-30.437	-65.8763	-9.67019	-57.2407	-8.93393	580.729
DCM20663	-9.27375	2.23706	-92.0436	-61.5302	-9.38108	-53.3287	-9.27375	527.665
DCM20774	-7.95282	2.73369	-7.45611	-75.2119	-10.2034	-46.1485	-7.95282	383.492
DCM20915	-6.52293	0.793049	-31.8485	-87.1605	-10.5417	-30.7066	-6.52293	302.276
DCM21004	-8.66681	2.32867	-72.7719	-85.3022	-9.6752	-48.56	-8.66681	525.693
DCM21297	-7.1447	1.48423	-60.3884	-72.2481	-9.8798	-40.7385	-7.1447	350.418
DCM2130	-9.06741	1.59616	-67.3283	-56.614	-9.37475	-47.8827	-9.06741	534.722
DCM22061	-6.16955	0.758195	-15.7474	-51.3724	-8.57906	-30.8973	-6.16955	221.275
DCM22284	-6.45124	0.835525	-14.5306	-58.9854	-9.24273	-28.7697	-6.45124	217.312
DCM2230	-8.86076	2.39272	-40.2773	-40.246	-10.148	-50.7576	-8.86076	513.591
DCM22786	-7.49528	1.60931	-29.5888	-80.056	-10.9648	-40.0333	-7.49528	386.879
DCM2279	-8.45165	3.14381	-92.9791	-160.925	-11.9729	-48.996	-8.45165	546.689
DCM23269	-6.88279	1.19478	-237.532	-84.9554	-9.9961	-38.7801	-6.88279	289.291
DCM2376	-6.9697	0.957806	-49.1619	-67.501	-10.0143	-39.1645	-6.9697	365.408
DCM2441	-6.29461	0.926819	58.1337	-61.9708	-9.43437	-32.4335	-6.29461	269.279
DCM24561	-7.92796	1.54542	-170.61	-56.0839	-10.3607	-45.4143	-7.92796	375.425
DCM2475	-8.27595	1.56857	-81.656	-54.6386	-9.53086	-45.9207	-8.27595	506.668
DCM2478	-8.34472	2.79941	-18.8805	-92.8849	-9.64488	-47.92	-8.34472	520.586
DCM24841	-8.28372	1.9457	112.027	-103.785	-9.87562	-48.0752	-8.28372	427.501
DCM25237	-7.31621	2.21169	-9.70978	-62.652	-11.1081	-39.9412	-7.31621	318.445
DCM25329	-7.08877	1.6346	-57.4429	-58.096	-10.2109	-40.8668	-7.08877	322.32
DCM25561	-7.97361	1.41489	-61.0081	-54.5523	-9.28432	-49.9834	-7.97361	425.509
DCM25687	-6.67451	1.43795	-94.6001	-66.231	-10.615	-36.8849	-6.67451	371.234
DCM25738	-7.38629	1.94326	-48.5561	-68.1221	-9.89265	-38.7222	-7.38629	372.421
DCM25765	-6.3816	1.9063	-12.942	-66.1117	-8.76881	-33.4917	-6.3816	231.339
DCM2585	-7.61749	1.64151	-27.7352	-58.1673	-9.87733	-40.1395	-7.61749	368.433
DCM2598	-8.59984	1.1074	-40.2431	-64.7594	-11.0052	-48.3225	-8.59984	539.653
DCM26048	-7.03281	1.38775	61.3074	-79.9286	-9.88994	-34.3333	-7.03281	341.43
DCM26057	-7.04065	1.5627	-52.4411	-62.6805	-9.91542	-39.176	-7.04065	317.345
DCM26062	-6.84227	1.12457	-21.7368	-58.1473	-9.40053	-34.513	-6.84227	342.782
DCM26714	-7.93519	2.13446	-41.8649	-66.823	-9.76437	-46.0002	-7.93519	430.569
DCM26981	-7.9856	1.53279	-75.214	-92.5531	-10.8086	-46.6538	-7.9856	429.561
DCM27691	-7.55373	1.13083	-101.637	-72.9156	-11.0684	-41.0857	-7.55373	464.566
DCM27955	-8.51819	3.98381	112.157	-107.076	-10.3016	-50.7917	-8.51819	495.6
DCM28032	-8.56469	4.14733	-48.8107	-78.8805	-9.33261	-52.2662	-8.56469	544.693
DCM28033	-8.18669	1.91761	3.44857	-67.0391	-8.90949	-48.3681	-8.18669	478.658
DCM28034	-9.1144	2.21419	-69.9305	-66.3238	-9.93145	-49.714	-9.1144	477.558
DCM28724	-7.04415	0.832767	-32.8626	-78.5839	-9.60227	-34.868	-7.04415	352.478
DCM28770	-7.63055	1.48893	43.4971	-62.0348	-9.63001	-44.1669	-7.63055	417.55
DCM28813	-7.78514	1.88974	-26.3269	-68.5169	-12.0308	-45.9301	-7.78514	368.412
DCM28859	-7.38311	1.1301	-29.7412	-68.6564	-10.4897	-40.5852	-7.38311	372.415
DCM28933	-8.47719	1.45931	-74.5916	-56.1102	-9.27673	-45.523	-8.47719	488.652
DCM29402	-7.53987	1.35845	16.9456	-77.677	-9.4103	-37.8146	-7.53987	396.487
DCM29531	-9.63214	2.24862	-78.2957	-66.4498	-10.2831	-57.5058	-9.63214	516.635
DCM29532	-8.54491	1.90742	-83.5922	-61.6008	-10.2211	-54.5722	-8.54491	578.706
DCM29534	-8.89586	1.83766	-84.4031	-63.7517	-10.3498	-50.46	-8.89586	558.716
DCM29547	-8.76286	2.48186	-124.526	-76.6215	-9.20596	-48.6267	-8.76286	583.705
DCM29556	-8.18198	1.41313	-91.0968	-117.729	-11.2097	-50.4112	-8.18198	532.662
DCM29571	-9.25678	2.06366	-3.46288	-53.8641	-8.94302	-52.4538	-9.25678	555.72
DCM29666	-9.47944	1.38011	-104.731	-45.5726	-9.50846	-54.9478	-9.47944	647.82
DCM29774	-7.51184	1.67461	-25.6233	-61.5851	-9.34019	-39.1022	-7.51184	369.465
DCM29793	-9.15934	1.40631	9.05581	-83.7699	-9.42136	-54.9063	-9.15934	573.694
DCM29815	-9.46595	2.31791	44.4321	-86.8115	-9.3398	-50.6722	-9.46595	682.859
DCM29840	-9.05833	2.36359	-116.234	-83.5963	-9.03453	-52.6982	-9.05833	517.714
DCM30263	-8.34524	1.78553	-118.279	-79.6184	-11.2013	-45.6966	-8.34524	525.693
DCM30268	-8.59065	2.18388	-72.153	-96.8265	-10.025	-45.9475	-8.59065	488.632
DCM30269	-10.5918	1.84653	277.686	-79.8178	-8.95989	-57.95	-10.5918	693.889
DCM30333	-8.08646	1.76535	42.3006	-93.7262	-10.0152	-45.9974	-8.08646	430.548
DCM30682	-7.48139	1.4572	3.79733	-68.1731	-10.6489	-42.2336	-7.48139	376.453
DCM30732	-8.06317	3.12983	-44.7145	-87.529	-10.077	-47.0994	-8.06317	368.433
DCM30886	-7.30143	1.08171	-114.272	-78.1045	-9.76426	-37.0055	-7.30143	369.44
DCM32253	-6.13522	0.855153	-26.0302	-61.2048	-8.74209	-33.4033	-6.13522	233.246
DCM32426	-7.09182	4.0597	-14.3553	-61.1929	-9.71953	-39.7432	-7.09182	401.264
DCM32428	-8.14542	1.73757	-21.377	-96.8933	-10.3688	-45.7925	-8.14542	379.504
DCM32890	-7.07966	2.23324	-54.982	-47.6424	-9.31916	-41.0433	-7.07966	361.417
DCM33486	-7.52466	1.7993	-32.8605	-67.3184	-9.54043	-42.9076	-7.52466	366.417
DCM33835	-6.67024	1.33831	-14.828	-79.5804	-8.82571	-32.9736	-6.67024	260.337
DCM34120	-8.66243	1.93585	115.887	-94.2033	-8.75978	-51.9115	-8.66243	505.571
DCM34281	-7.13959	1.24969	-174.953	-66.4306	-9.17829	-37.0015	-7.13959	371.477
DCM3444	-7.69239	1.48488	-110.549	-92.8556	-11.5664	-41.4069	-7.69239	344.386
DCM34448	-7.18165	1.12253	-85.0995	-71.4843	-9.78711	-36.3683	-7.18165	321.401
DCM34525	-6.7169	1.15156	-63.1897	-62.7709	-11.4956	-36.6025	-6.7169	284.359
DCM34526	-6.34142	1.09493	-73.2419	-68.1948	-10.1628	-35.5355	-6.34142	278.311
DCM34747	-6.8523	0.91462	-15.2276	-54.5931	-9.33667	-38.0265	-6.8523	340.398
DCM34984	-6.64997	1.07156	-40.3295	-72.8564	-10.4012	-36.0491	-6.64997	294.329
DCM35395	-7.12582	2.80657	-62.6023	-102.848	-9.85123	-41.1789	-7.12582	387.435
DCM3542	-6.84766	1.38103	-48.8582	-62.4216	-11.6606	-34.3786	-6.84766	336.347
DCM35470	-8.03957	2.80872	-38.2637	-80.7086	-9.56255	-46.7458	-8.03957	362.426
DCM35660	-7.69762	2.07214	-63.8223	-65.0108	-9.45305	-45.1887	-7.69762	380.488
DCM3584	-5.3961	1.69202	-29.8805	-59.0564	-9.63907	-26.8125	-5.3961	195.182
DCM35942	-8.38165	3.06878	-138.283	-53.2548	-9.89323	-45.6942	-8.38165	452.555
DCM35960	-8.07708	2.47689	-65.7453	-71.1047	-9.32102	-45.5791	-8.07708	467.566
DCM362	-8.54982	3.22455	26.3491	-46.7988	-11.6196	-52.5907	-8.54982	543.685
DCM36268	-7.65388	1.09973	18.6362	-61.5348	-9.57406	-41.0027	-7.65388	342.414
DCM36446	-7.53651	1.77826	20.3818	-63.4619	-8.99688	-41.7586	-7.53651	335.423
DCM36734	-7.45224	1.23553	-72.4776	-64.0736	-9.37313	-43.4331	-7.45224	400.523
DCM37178	-8.0179	1.72867	25.8521	-69.1329	-10.1128	-46.1278	-8.0179	425.553
DCM37228	-8.25813	1.15862	98.6751	-86.3478	-10.7156	-51.2521	-8.25813	492.556
DCM37241	-8.36156	1.56947	119.168	-102.02	-9.48343	-49.3341	-8.36156	485.536
DCM37293	-8.66659	2.34043	-23.6671	-54.0766	-9.69662	-48.8962	-8.66659	509.603
DCM37492	-8.17893	1.18825	6.06147	-100.925	-9.85021	-50.5549	-8.17893	482.6
DCM37950	-9.13229	1.96165	-63.703	-98.3043	-13.1348	-56.5446	-9.13229	525.537
DCM38209	-7.61117	1.92612	-27.8821	-69.0037	-9.90067	-43.8403	-7.61117	402.897
DCM38243	-7.6141	2.32681	58.6871	-72.0785	-9.15773	-43.4966	-7.6141	350.462
DCM38500	-9.3326	3.47576	-40.2795	-72.9247	-9.77551	-59.1353	-9.3326	503.64
DCM38746	-7.2794	3.21999	-6.90667	-53.7483	-9.90835	-39.706	-7.2794	442.556
DCM38753	-9.19649	1.70051	-89.2061	-73.9339	-11.3555	-53.6143	-9.19649	575.666
DCM38761	-8.97878	2.48155	-3.93337	-44.0071	-10.1746	-53.6256	-8.97878	580.682
DCM38766	-9.17767	2.68367	28.2613	-64.7864	-9.74909	-52.0372	-9.17767	581.754
DCM38769	-8.76288	1.34311	-113.898	-68.3776	-9.54009	-49.5092	-8.76288	511.623
DCM38771	-9.21304	1.74242	-99.011	-84.226	-11.8307	-53.3833	-9.21304	575.666
DCM38881	-8.9055	1.48509	21.0348	-61.6076	-9.69876	-48.7259	-8.9055	690.631
DCM38891	-9.14609	2.20883	-3.27506	-66.7862	-10.5589	-58.3271	-9.14609	566.702
DCM38897	-9.11503	1.85966	-63.0907	-60.4059	-9.30546	-59.8998	-9.11503	594.756
DCM38971	-8.95541	1.22149	-42.7533	-74.4678	-9.51877	-50.8033	-8.95541	461.606
DCM38972	-8.41126	1.24021	1.76112	-81.3449	-9.42979	-52.2375	-8.41126	442.56
DCM39023	-9.82804	2.04011	116.111	-74.4058	-8.57138	-60.6653	-9.82804	687.919
DCM39026	-9.35553	2.02336	-64.8401	-89.6111	-9.37319	-57.0093	-9.35553	714.864
DCM39027	-9.08115	3.39991	-54.2532	-123.533	-11.4425	-52.2722	-9.08115	714.876
DCM39038	-9.00908	3.15049	-63.1262	-85.7661	-10.3077	-52.1739	-9.00908	498.668
DCM39429	-8.29067	4.29917	-64.6857	-65.4101	-10.6791	-49.131	-8.29067	487.575
DCM39443	-9.5923	1.23442	-126.099	-56.0961	-8.71689	-55.1254	-9.5923	586.777
DCM39517	-9.06675	2.01336	45.7023	-97.1266	-10.4918	-52.4907	-9.06675	624.806
DCM40112	-8.64585	2.79804	-133.712	-52.3083	-9.63317	-46.9477	-8.64585	414.55
DCM405	-7.1635	2.22306	-15.7024	-87.3043	-10.6733	-38.0535	-7.1635	329.396
DCM408	-8.61517	2.18365	-39.1826	-74.1892	-9.72099	-49.7995	-8.61517	497.592
DCM42000	-7.00208	1.10945	61.7764	-98.9997	-11.5064	-40.6979	-7.00208	355.316
DCM42804	-8.66019	2.07441	-9.71709	-83.0753	-9.96832	-53.4259	-8.66019	413.474
DCM43415	-7.81786	1.07349	-42.8614	-70.1452	-10.0877	-42.672	-7.81786	429.561
DCM43587	-7.48521	2.10482	-38.4498	-58.9507	-9.82778	-37.5252	-7.48521	395.48
DCM43592	-7.87408	1.77459	-4.6266	-102.25	-9.90029	-43.3163	-7.87408	382.416
DCM44292	-7.1825	0.895836	-34.2306	-80.3236	-9.50926	-36.449	-7.1825	323.299
DCM45225	-6.43474	2.06772	-15.8308	-68.0135	-10.2927	-35.3238	-6.43474	282.318
DCM45266	-8.07187	2.15073	76.2615	-88.0825	-9.59249	-44.7984	-8.07187	390.568
DCM45302	-8.09598	1.1268	-85.8849	-91.2491	-10.2921	-48.9815	-8.09598	376.453
DCM45501	-8.47596	0.762086	-58.8358	-109.472	-11.3853	-46.5507	-8.47596	415.534
DCM46479	-8.60996	1.3356	94.8641	-84.5884	-10.2686	-50.9731	-8.60996	485.536
DCM46495	-8.72657	1.03078	113.663	-109.441	-11.2895	-53.3443	-8.72657	497.572
DCM46541	-7.8399	1.26781	-24.7477	-66.3789	-10.1463	-47.081	-7.8399	440.519
DCM46702	-8.90223	1.53674	-84.5951	-93.0611	-9.86345	-52.2842	-8.90223	447.532
DCM47120	-8.34389	1.35118	34.5439	-79.6818	-9.42774	-48.1349	-8.34389	426.537
DCM47255	-8.25014	1.91666	19.1637	-103.756	-10.4584	-46.1997	-8.25014	407.423
DCM47320	-7.77397	1.56797	-34.7849	-49.4051	-9.36895	-43.8569	-7.77397	375.468
DCM47520	-6.63689	1.39329	-9.31595	-64.7136	-8.91801	-37.2209	-6.63689	290.338
DCM47990	-8.65515	2.63612	-85.6892	-69.9421	-9.81609	-54.1179	-8.65515	578.706
DCM47995	-9.23777	1.89439	15.0261	-71.0037	-7.86315	-50.7888	-9.23777	665.787
DCM47997	-8.26395	2.20872	63.5854	-86.5675	-12.2848	-43.6221	-8.26395	625.722
DCM48023	-9.14018	1.85258	-71.1025	-94.7417	-12.8246	-55.5729	-9.14018	566.619
DCM48025	-9.24818	1.52761	-9.39981	-71.6642	-9.22977	-45.0579	-9.24818	597.713
DCM48026	-9.31116	2.52503	-62.5659	-89.3437	-9.18893	-57.9573	-9.31116	550.7
DCM48028	-9.03272	1.93166	-58.5641	-87.3053	-9.34461	-58.4179	-9.03272	608.739
DCM48059	-9.14701	2.11372	-5.13689	-102.046	-10.0366	-54.901	-9.14701	681.79
DCM48135	-9.03257	1.56317	-29.7617	-75.7903	-9.82232	-55.4083	-9.03257	594.756
DCM48214	-8.01569	2.36258	-49.9358	-79.9982	-9.44366	-48.5827	-8.01569	425.573
DCM48217	-8.17362	1.29411	-35.7598	-57.4715	-8.98201	-42.7735	-8.17362	427.589
DCM48261	-9.12991	2.28588	107.645	-102.698	-11.0344	-51.3701	-9.12991	665.852
DCM48283	-8.41147	2.60128	-123.891	-94.4829	-10.4619	-50.8315	-8.41147	453.627
DCM48505	-6.88139	1.00289	-14.4087	-56.2835	-10.0217	-34.1806	-6.88139	308.809
DCM4887	-6.58584	1.5234	-232.146	-66.6403	-9.17807	-36.3496	-6.58584	259.265
DCM49085	-10.0262	2.34307	-133.941	-103.019	-7.60715	-65.5567	-10.0262	712.852
DCM49160	-8.95473	1.79742	312.285	-122.014	-11.929	-49.8275	-8.95473	499.608
DCM49180	-8.15375	2.72821	-52.5826	-77.9571	-9.4618	-48.4304	-8.15375	497.592
DCM49203	-7.72604	2.02178	-66.7158	-65.2519	-10.3405	-41.1786	-7.72604	375.488
DCM49591	-6.37929	1.20551	-23.5208	-65.9181	-9.76283	-32.846	-6.37929	281.315
DCM50478	-7.43292	1.38071	29.1031	-64.8026	-9.57063	-37.0826	-7.43292	368.452
DCM50581	-6.76302	1.14666	46.7008	-70.0257	-10.8254	-36.1659	-6.76302	286.306
DCM50757	-8.01988	1.48986	-24.5313	-106.982	-10.1434	-46.2414	-8.01988	395.503
DCM50768	-7.8706	1.19624	-15.7672	-65.6767	-9.99734	-41.7695	-7.8706	383.467
DCM51005	-6.61848	1.07825	6.43759	-69.884	-9.2156	-32.8581	-6.61848	266.772
DCM5170	-7.23185	1.16403	8.22064	-64.6582	-9.60728	-38.2436	-7.23185	347.39
DCM51876	-8.33722	2.68456	14.3685	-72.3833	-10.1049	-46.5978	-8.33722	416.521
DCM52095	-7.82768	1.33811	0.665031	-63.2679	-9.78892	-41.9736	-7.82768	422.933
DCM5248	-6.72561	1.28896	-82.9128	-58.8249	-11.2877	-37.2944	-6.72561	288.303
DCM52537	-7.68598	1.3819	2.34637	-73.7646	-9.55601	-43.0757	-7.68598	346.471
DCM52570	-7.02739	1.32931	-77.4145	-69.0839	-9.45353	-37.9577	-7.02739	331.44
DCM52676	-7.80481	1.41445	-143.732	-54.2008	-9.24385	-44.2089	-7.80481	383.488
DCM52708	-7.87892	1.39811	-68.4699	-108.074	-9.46087	-43.5488	-7.87892	410.47
DCM52789	-7.30644	1.87975	-35.3169	-58.0282	-9.26062	-42.1148	-7.30644	347.439
DCM52839	-7.76546	1.76269	33.1051	-51.6373	-9.34231	-44.1616	-7.76546	432.497
DCM53155	-7.01046	1.66881	-17.1872	-82.9539	-11.0915	-39.3787	-7.01046	341.407
DCM53228	-7.89233	1.24691	12.9526	-76.7944	-10.9227	-37.9284	-7.89233	416.542
DCM53313	-7.12334	1.33682	-16.4128	-70.9125	-10.9694	-39.731	-7.12334	327.38
DCM53436	-7.01729	1.62491	-12.9516	-61.1689	-9.05588	-35.4311	-7.01729	329.42
DCM55136	-7.52267	1.35518	-13.3242	-92.4437	-9.57051	-38.5104	-7.52267	388.492
DCM55420	-7.52237	1.3793	130.204	-75.7962	-10.6022	-40.4602	-7.52237	339.355
DCM55533	-8.32391	5.07978	-84.8921	-127.249	-11.2344	-48.1974	-8.32391	433.505
DCM55540	-8.7428	2.30131	-89.2886	-62.6065	-10.1163	-54.1097	-8.7428	517.667
DCM55541	-8.34616	1.5283	-73.2098	-65.4658	-10.0148	-46.0508	-8.34616	503.64
DCM56045	-8.95139	1.59044	-12.2692	-65.5124	-9.50454	-55.9652	-8.95139	549.652
DCM56458	-6.90109	1.43563	-11.7884	-66.9398	-9.02229	-35.8955	-6.90109	306.793
DCM57012	-8.20614	3.09421	-105.825	-84.666	-10.3283	-46.1512	-8.20614	516.635
DCM57013	-9.22096	1.74814	-81.4643	-103.345	-11.335	-52.9459	-9.22096	592.733
DCM57014	-8.49079	1.82017	-86.223	-74.3323	-9.39014	-48.5501	-8.49079	516.635
DCM57017	-7.82874	1.78856	-44.01	-46.1552	-9.65125	-42.9222	-7.82874	524.633
DCM57018	-9.86792	4.62338	-15.9042	-136.813	-11.3283	-60.2187	-9.86792	681.83
DCM57019	-8.86719	1.68599	-56.1662	-78.1678	-10.5332	-51.1611	-8.86719	542.673
DCM57021	-9.057	4.08936	-51.8845	-46.3051	-9.14878	-55.7235	-9.057	678.749
DCM57024	-9.361	1.76067	-80.5097	-55.4493	-9.77866	-54.9318	-9.361	582.595
DCM57039	-9.08793	1.44767	0.096532	-107.008	-11.2719	-55.3698	-9.08793	619.787
DCM57042	-9.00729	2.53077	-18.7454	-56.4227	-9.22673	-55.9326	-9.00729	599.654
DCM57151	-9.42123	1.08312	-25.1806	-41.1097	-9.48718	-51.4238	-9.42123	608.783
DCM57189	-10.0189	1.31913	268.623	-105.119	-10.2021	-59.1027	-10.0189	699.937
DCM57239	-8.78273	1.99098	-60.9636	-56.3817	-10.2238	-52.2914	-8.78273	491.632
DCM57289	-9.10983	1.55418	-122.189	-67.844	-10.3147	-49.2156	-9.10983	547.74
DCM58111	-6.96269	0.978119	-126.503	-82.7184	-10.9145	-35.221	-6.96269	343.329
DCM59381	-8.29665	1.50162	-37.664	-73.5384	-9.9036	-49.7894	-8.29665	395.503
DCM59693	-6.54774	1.21212	-72.5921	-62.1013	-10.306	-31.0537	-6.54774	312.756
DCM59725	-7.02892	3.10683	-76.144	-52.1173	-9.57679	-39.5996	-7.02892	347.39
DCM61266	-9.76465	1.81199	84.9051	-97.5019	-11.6481	-59.2096	-9.76465	596.688
DCM61346	-9.58196	1.39383	-104.054	-104.531	-8.55614	-56.5018	-9.58196	550.656
DCM61537	-8.22039	2.03924	-13.3548	-55.1417	-10.0096	-50.6322	-8.22039	469.606
DCM62274	-7.18252	1.11558	-53.1835	-60.0284	-10.3673	-32.4165	-7.18252	342.395
DCM62881	-9.00072	1.73741	42.728	-66.3717	-9.25106	-52.223	-9.00072	613.803
DCM62943	-8.02338	1.98991	-27.1487	-88.1947	-9.61801	-42.9494	-8.02338	395.459
DCM63228	-8.43906	1.75033	-78.3376	-68.8858	-10.4799	-51.8098	-8.43906	443.568
DCM63536	-8.45144	1.17883	-59.0501	-110.608	-9.92688	-46.0529	-8.45144	415.534
DCM64364	-8.43497	1.54612	68.6989	-91.194	-10.3975	-48.289	-8.43497	492.524
DCM6447	-8.1089	1.41096	98.4557	-44.3507	-9.56061	-45.859	-8.1089	482.646
DCM64526	-8.56321	1.43969	43.0306	-65.2655	-10.7935	-44.0676	-8.56321	443.547
DCM6485	-8.71624	1.64753	98.9356	-107.428	-11.9184	-50.7413	-8.71624	489.572
DCM6489	-8.98071	2.10722	-120.226	-58.0368	-8.82611	-50.4366	-8.98071	566.655
DCM65035	-7.41118	3.34248	-76.8469	-62.7982	-9.61585	-42.7546	-7.41118	416.522
DCM65267	-8.1557	2.70121	19.6353	-64.4671	-10.1503	-45.3189	-8.1557	435.589
DCM65270	-7.86802	1.72784	34.5654	-66.7043	-10.4398	-38.8988	-7.86802	403.523
DCM655	-6.97918	1.78588	-36.863	-70.5643	-10.5298	-37.563	-6.97918	314.341
DCM6579	-8.13495	1.01746	-72.7897	-87.1177	-9.7647	-50.813	-8.13495	509.627
DCM65954	-8.50073	1.75902	-75.3003	-70.6677	-9.56405	-47.8666	-8.50073	518.678
DCM65985	-8.28422	1.96901	117.516	-66.1686	-10.3077	-44.2297	-8.28422	428.577
DCM66013	-10.0899	2.7382	5.93302	-109.271	-11.8176	-62.4609	-10.0899	665.787
DCM66033	-9.2855	1.82957	-28.4717	-72.0769	-10.4284	-58.2467	-9.2855	563.655
DCM66045	-8.85749	1.59175	-89.0618	-77.8807	-9.96296	-50.9589	-8.85749	564.605
DCM6605	-8.18838	1.79458	4.45849	-66.3026	-9.2274	-45.3925	-8.18838	399.579
DCM66080	-9.38292	1.65615	-35.187	-78.9761	-10.1346	-59.7202	-9.38292	678.802
DCM66085	-8.70383	1.39135	-36.7854	-100.095	-10.2633	-49.9701	-8.70383	650.861
DCM66086	-8.15248	1.1806	44.6862	-82.3097	-9.41624	-48.2061	-8.15248	616.759
DCM66087	-9.12969	1.6636	-16.6307	-89.7577	-8.90584	-56.5637	-9.12969	636.834
DCM66223	-8.0073	1.63453	-56.2868	-78.8242	-10.3699	-46.6411	-8.0073	397.519
DCM66277	-9.48559	1.80359	-111.25	-75.1821	-9.8627	-50.3735	-9.48559	617.832
DCM66278	-8.77426	3.85087	48.4332	-100.113	-11.394	-51.4884	-8.77426	616.759
DCM66284	-9.1103	4.43813	-67.9737	-75.8984	-10.3006	-57.0985	-9.1103	593.768
DCM66686	-9.02141	1.25622	-116.399	-110.169	-11.5705	-45.1978	-9.02141	507.675
DCM66689	-9.54177	1.82156	258.422	-111.009	-10.1829	-55.3199	-9.54177	687.926
DCM68029	-7.0424	1.64924	-15.474	-60.8806	-8.72216	-36.1065	-7.0424	304.39
DCM6816	-7.81824	2.51292	-40.9741	-51.2562	-9.25074	-46.3432	-7.81824	352.434
DCM68497	-7.06331	1.04918	-94.202	-66.7174	-8.95666	-37.1167	-7.06331	335.423
DCM68875	-5.9493	1.24549	-30.3843	-84.8725	-10.4729	-28.2808	-5.9493	296.248
DCM69299	-7.54227	1.2924	38.8153	-71.3899	-9.57575	-38.3391	-7.54227	330.472
DCM69912	-6.75989	1.21381	-26.8599	-60.8033	-9.08921	-37.8903	-6.75989	297.398
DCM70226	-6.88169	1.43972	-62.9629	-60.958	-8.90265	-37.9368	-6.88169	275.348
DCM70536	-7.96703	2.22861	37.5228	-67.6226	-10.6472	-45.4998	-7.96703	422.504
DCM70561	-8.89384	0.828046	-47.3753	-88.0992	-10.1982	-50.3227	-8.89384	525.646
DCM70655	-6.05501	0.809886	-80.427	-51.5972	-9.19984	-28.713	-6.05501	252.289
DCM70935	-6.93538	2.74867	-29.8865	-59.1518	-9.88316	-35.5598	-6.93538	296.345
DCM71454	-7.4707	1.16412	-50.9134	-79.4625	-9.59171	-41.971	-7.4707	333.363
DCM71501	-6.89769	1.95622	28.8157	-65.0963	-9.83744	-37.4638	-6.89769	341.342
DCM71689	-7.15919	2.29335	-128.036	-65.3067	-9.38831	-37.639	-7.15919	357.478
DCM71724	-7.06879	1.78545	-152.445	-97.8465	-11.4753	-36.8813	-7.06879	348.383
DCM72086	-7.43188	1.72497	69.1989	-101.541	-9.06484	-42.821	-7.43188	350.418
DCM72282	-7.31296	2.20245	-95.4666	-57.1764	-10.1925	-38.5203	-7.31296	373.403
DCM72464	-8.01434	1.45667	16.5015	-72.7228	-9.03623	-46.5368	-8.01434	354.45
DCM73029	-7.96105	1.33777	66.9433	-91.6946	-10.4118	-45.358	-7.96105	416.518
DCM73077	-8.05652	1.50751	-1.62265	-77.4909	-9.87808	-42.4643	-8.05652	344.499
DCM73597	-8.35528	2.53718	-81.3567	-58.9856	-9.11016	-46.7102	-8.35528	550.721
DCM73598	-8.74327	2.19401	-91.7485	-69.8877	-10.6321	-54.5126	-8.74327	528.65
DCM73601	-8.12674	2.60037	-8.68383	-82.6654	-9.4195	-42.6498	-8.12674	466.582
DCM73602	-8.62257	1.8669	-77.2177	-94.9276	-12.6629	-40.1464	-8.62257	475.586
DCM73603	-8.67862	1.58516	-71.7255	-46.4879	-10.2378	-48.6064	-8.67862	503.64
DCM73651	-8.8372	2.64564	52.7383	-88.187	-11.6202	-55.0446	-8.8372	581.709
DCM7382	-6.27396	1.08908	-15.275	-60.9243	-8.98749	-32.0334	-6.27396	231.339
DCM74127	-7.78375	1.14601	13.8646	-70.6876	-9.16506	-40.5463	-7.78375	389.52
DCM74673	-7.84558	1.77752	1.51626	-69.4783	-11.6471	-39.8249	-7.84558	407.514
DCM75073	-7.99081	1.2023	55.4018	-67.7331	-9.49581	-42.5708	-7.99081	444.572
DCM75077	-8.91754	2.89262	-80.1795	-68.8623	-10.879	-53.8261	-8.91754	558.716
DCM75078	-7.92011	1.84282	-34.3075	-62.2007	-9.69519	-43.0509	-7.92011	524.633
DCM75080	-8.54937	2.22395	-8.55016	-65.8341	-8.91269	-51.2294	-8.54937	550.671
DCM75087	-8.49235	1.64931	-76.9286	-93.3235	-10.1439	-51.9266	-8.49235	502.608
DCM751	-8.20479	0.999901	-51.3003	-116.133	-11.7823	-50.0829	-8.20479	489.613
DCM75105	-9.51504	2.47478	-18.6648	-60.298	-10.8255	-56.9394	-9.51504	580.682
DCM75109	-9.46369	2.00046	-102.309	-103.902	-11.9764	-61.3889	-9.46369	603.676
DCM75112	-9.11272	2.19343	-49.3562	-77.2171	-9.41555	-53.5324	-9.11272	504.628
DCM75113	-8.86391	1.73376	-14.6624	-83.2851	-9.92138	-50.437	-8.86391	537.661
DCM75118	-8.77904	2.40752	-42.0646	-96.7063	-9.68016	-56.859	-8.77904	574.678
DCM75119	-8.86954	1.24527	74.8865	-82.2774	-9.95574	-46.2427	-8.86954	502.615
DCM75124	-9.10491	1.63451	39.4555	-93.8807	-12.9381	-53.4418	-9.10491	583.693
DCM752	-8.43014	2.29342	-25.3792	-79.6028	-9.68875	-54.4558	-8.43014	538.625
DCM75244	-8.23402	1.28202	-8.93589	-100.516	-12.9362	-47.4007	-8.23402	509.606
DCM75304	-9.14918	1.77153	41.2868	-113.002	-10.1066	-52.2433	-9.14918	492.62
DCM75329	-8.58515	2.04222	37.4985	-86.2066	-11.8808	-50.8634	-8.58515	502.615
DCM75354	-9.92229	2.11908	-59.8713	-29.3302	-9.49786	-51.9705	-9.92229	662.869
DCM75355	-9.11677	1.91563	31.5249	-67.2148	-10.5153	-51.8282	-9.11677	681.871
DCM75362	-8.5226	2.39521	-59.3774	-105.299	-10.0965	-52.7349	-8.5226	479.596
DCM75377	-8.42683	2.55816	-119.339	-71.0883	-9.72427	-42.377	-8.42683	517.714
DCM75385	-8.88316	1.92598	-82.2552	-72.5897	-10.466	-52.7847	-8.88316	497.639
DCM754	-8.47641	2.8217	-65.0508	-67.771	-11.9773	-49.5345	-8.47641	475.586
DCM75501	-7.2953	2.29476	8.65983	-75.1747	-9.5239	-38.0894	-7.2953	424.418
DCM75726	-8.86883	1.6715	-146.211	-65.2176	-9.76971	-50.018	-8.86883	546.756
DCM75729	-9.35843	2.66033	270.264	-53.978	-8.93298	-52.9158	-9.35843	643.873
DCM7637	-7.97187	1.44619	104.615	-97.2224	-11.2846	-47.1012	-7.97187	459.567
DCM76522	-6.74589	1.126	-30.2177	-55.9435	-11.0979	-31.5594	-6.74589	317.78
DCM7692	-6.61969	1.34093	-41.903	-73.7944	-9.18474	-36.1884	-6.61969	300.426
DCM77611	-7.58532	2.01632	-10.8208	-63.5732	-11.0431	-41.1036	-7.58532	383.467
DCM77937	-7.05933	1.54076	-67.5248	-62.2363	-10.7725	-43.2155	-7.05933	322.364
DCM78359	-6.85159	1.0174	-64.1337	-57.6392	-10.0576	-34.0889	-6.85159	354.337
DCM78683	-6.848	1.47341	-63.1248	-59.6459	-9.15779	-36.244	-6.848	339.754
DCM78789	-6.81032	1.53597	-46.0976	-61.933	-8.95278	-29.7962	-6.81032	283.371
DCM79046	-6.26176	1.2591	36.7425	-64.511	-8.92958	-32.7738	-6.26176	249.31
DCM79611	-9.2428	2.23168	59.2222	-66.9729	-8.008	-56.3234	-9.2428	474.561
DCM79733	-8.39426	1.37536	-27.2401	-96.2196	-9.74424	-44.3837	-8.39426	487.984
DCM7989	-6.91881	1.46742	-47.0427	-56.8467	-9.85005	-36.5425	-6.91881	297.402
DCM79916	-9.36799	2.00044	120.602	-106.306	-11.1025	-55.7984	-9.36799	575.662
DCM79946	-7.33018	1.38365	-50.0247	-57.9863	-9.4255	-31.9349	-7.33018	395.483
DCM80103	-7.5508	0.88828	-61.0632	-73.5875	-10.0009	-45.448	-7.5508	429.928
DCM80222	-7.69498	1.4316	-16.4844	-73.1534	-11.2406	-43.6173	-7.69498	340.379
DCM80608	-7.07009	2.34961	28.0252	-67.0998	-9.79086	-39.2678	-7.07009	320.795
DCM80677	-6.79452	0.930872	-53.6133	-56.1104	-9.24742	-33.8833	-6.79452	292.427
DCM80931	-6.90131	1.43238	-54.2418	-61.1242	-9.37	-37.8973	-6.90131	300.426
DCM80989	-7.76209	1.53119	5.86868	-83.9048	-10.5676	-45.8693	-7.76209	450.487
DCM81663	-7.50783	1.17326	-41.3466	-86.257	-9.63876	-43.2972	-7.50783	362.426
DCM81668	-7.66204	2.17682	8.17837	-71.9621	-9.28518	-42.2766	-7.66204	345.443
DCM82216	-8.33245	2.23457	-5.50459	-87.7633	-8.64517	-48.9235	-8.33245	419.478
DCM82233	-7.97834	1.92032	18.0281	-71.1756	-9.6339	-42.3193	-7.97834	368.501
DCM82649	-7.17742	1.55923	50.8413	-82.9123	-9.96972	-39.1851	-7.17742	317.392
DCM82724	-7.01769	2.28042	67.2464	-75.5283	-9.86889	-33.8778	-7.01769	369.484
DCM82828	-8.30228	1.79174	15.1322	-75.7287	-8.88348	-43.8955	-8.30228	444.576
DCM82831	-7.84928	1.48526	-50.9525	-77.2317	-10.2878	-48.6065	-7.84928	478.505
DCM82875	-9.13453	2.19361	-73.3765	-65.7933	-10.4579	-55.321	-9.13453	529.678
DCM83012	-7.16344	1.1075	-54.4113	-76.101	-10.1644	-39.2377	-7.16344	350.374
DCM83025	-8.42766	1.40554	42.9867	-97.5257	-10.7906	-43.0859	-8.42766	415.558
DCM83035	-8.68829	1.54137	-27.6238	-82.4564	-10.1512	-55.3952	-8.68829	472.61
DCM83041	-8.5019	1.52098	14.4334	-60.874	-9.76216	-50.5201	-8.5019	497.538
DCM83133	-7.27385	1.76877	43.6436	-74.8789	-8.70699	-40.9896	-7.27385	391.424
DCM83733	-7.64381	2.45776	-15.776	-52.361	-9.65856	-43.9756	-7.64381	438.955
DCM83783	-7.51819	1.52947	-34.345	-69.6258	-10.5756	-40.249	-7.51819	408.477
DCM83824	-8.06289	1.25403	-0.0389047	-73.2824	-10.0106	-38.5901	-8.06289	408.424
DCM84132	-8.47936	1.40587	-42.7741	-84.8501	-10.8801	-48.6866	-8.47936	474.483
DCM8416	-8.06457	3.64168	-166.266	-86.516	-11.3174	-49.9398	-8.06457	452.555
DCM84279	-8.36348	2.19452	-90.709	-68.3815	-10.1547	-46.1916	-8.36348	567.548
DCM84364	-9.0733	1.49526	-144.417	-101.076	-11.4653	-50.1347	-9.0733	511.623
DCM84453	-8.54314	2.00983	-89.8698	-82.8714	-10.4462	-50.1434	-8.54314	559.667
DCM84481	-9.11835	2.1089	-16.367	-53.9073	-9.99304	-56.9472	-9.11835	580.729
DCM84518	-9.39563	3.08742	253.618	-67.9795	-8.23423	-53.0425	-9.39563	687.926
DCM84568	-8.91988	1.98437	-95.1337	-73.7312	-10.3099	-49.55	-8.91988	553.703
DCM8457	-6.77096	2.04196	6.16214	-58.2324	-10.6293	-33.6613	-6.77096	296.345
DCM84571	-8.35563	2.75943	-58.418	-68.1821	-9.84126	-51.0447	-8.35563	461.606
DCM84583	-9.19032	2.11681	36.9844	-84.1845	-10.1094	-57.6227	-9.19032	518.614
DCM84619	-8.39995	1.36669	58.2679	-87.7631	-8.95473	-42.5866	-8.39995	608.824
DCM84668	-8.54736	1.0471	-61.6773	-86.0696	-9.74522	-46.7712	-8.54736	477.605
DCM85076	-8.63272	1.45705	-115.052	-110.741	-10.7555	-47.9771	-8.63272	514.579
DCM85663	-8.14553	0.80992	19.331	-84.3863	-9.83532	-47.4657	-8.14553	368.481
DCM85870	-6.65993	2.39125	-47.297	-75.5825	-9.6008	-34.0745	-6.65993	342.317
DCM86802	-7.71829	1.62485	-26.8807	-63.9439	-10.2636	-43.0964	-7.71829	365.477
DCM86941	-7.11671	0.864511	-136.447	-67.3684	-9.98192	-37.4776	-7.11671	333.368
DCM87112	-7.94234	1.54022	-12.2193	-77.371	-10.6434	-39.7854	-7.94234	369.44
DCM87524	-7.55919	1.67006	83.1829	-79.0893	-9.81641	-42.2099	-7.55919	394.471
DCM88797	-9.45751	2.41595	112.816	-115.976	-10.1739	-61.1514	-9.45751	487.553
DCM88879	-7.20045	1.19606	-104.983	-85.6025	-9.47969	-40.6229	-7.20045	329.444
DCM88894	-9.0493	1.23149	-124.458	-65.931	-9.72574	-52.0601	-9.0493	496.608
DCM88974	-8.15987	2.05247	-100.485	-74.6066	-9.67485	-47.3427	-8.15987	450.539
DCM88992	-7.60526	1.39057	17.897	-81.012	-9.83293	-42.2128	-7.60526	469.517
DCM89082	-7.05434	1.0627	-53.7365	-72.5797	-9.54566	-39.134	-7.05434	361.466
DCM89752	-6.90036	1.93581	-61.5691	-54.9079	-9.30818	-32.5243	-6.90036	319.336
DCM89771	-7.2588	1.69834	-47.9775	-56.9866	-10.0025	-39.9173	-7.2588	375.493
DCM90133	-7.57216	1.83513	-30.2256	-57.932	-9.77107	-46.0918	-7.57216	381.456
DCM90213	-7.39662	2.40531	-44.8598	-92.7347	-9.79997	-36.3118	-7.39662	370.236
DCM90563	-6.32024	1.02609	-25.9272	-64.0832	-9.94753	-33.2738	-6.32024	299.305
DCM90724	-7.36614	1.02908	8.87352	-63.1989	-10.3062	-39.9719	-7.36614	282.387
DCM91006	-7.56243	3.80565	-132.572	-69.169	-9.46949	-44.3049	-7.56243	378.816
DCM91011	-7.41612	1.36663	-139.386	-66.5604	-9.93531	-41.2852	-7.41612	362.361
DCM91426	-7.36877	1.40718	-95.7464	-79.3921	-10.1557	-38.3417	-7.36877	414.55
DCM91504	-7.56806	1.52905	24.279	-60.2115	-9.7885	-34.609	-7.56806	344.499
DCM91661	-6.18509	0.94165	-219.889	-65.6159	-9.09197	-32.1261	-6.18509	227.22
DCM91792	-7.14161	1.84511	-79.2389	-90.5019	-9.54061	-40.1963	-7.14161	379.407
DCM91852	-7.44793	0.961852	-13.5937	-81.9204	-9.12735	-41.1046	-7.44793	377.872
DCM91973	-8.75759	1.25986	-19.3033	-84.6153	-10.4155	-50.8377	-8.75759	492.664
DCM91976	-8.73956	3.78013	-69.6975	-89.9487	-10.5852	-53.8801	-8.73956	534.613
DCM92035	-9.10073	1.9905	-65.1896	-75.6737	-10.7975	-51.4262	-9.10073	515.651
DCM92079	-6.72755	1.58162	-32.8486	-52.1958	-9.853	-35.202	-6.72755	329.331
DCM92409	-7.39139	1.07304	-84.9482	-70.9163	-9.70562	-47.5357	-7.39139	401.422
DCM92877	-8.05655	2.49875	-84.2828	-46.4712	-9.4866	-40.5189	-8.05655	440.608
DCM93255	-7.70243	1.99744	60.3291	-60.8209	-9.74399	-44.9139	-7.70243	379.46
DCM93444	-8.00385	1.96272	-85.7083	-105.421	-11.8158	-45.8619	-8.00385	502.608
DCM93451	-7.39279	1.93052	-7.07047	-70.5117	-9.57598	-41.093	-7.39279	442.556
DCM93457	-8.97491	2.67461	-106.838	-66.5544	-8.58237	-53.8986	-8.97491	631.77
DCM93464	-8.97398	1.68031	-65.0092	-49.8283	-9.40608	-48.5512	-8.97398	589.649
DCM93468	-9.54106	1.48802	16.3003	-49.113	-10.0171	-47.4289	-9.54106	555.676
DCM93470	-8.84026	1.67544	-89.1484	-56.9304	-11.4453	-52.9316	-8.84026	613.637
DCM93475	-9.08491	1.04194	-85.9558	-89.0317	-12.4279	-50.7161	-9.08491	628.73
DCM93476	-9.18241	1.73055	3.0056	-78.4526	-10.7191	-50.8854	-9.18241	563.655
DCM93507	-9.20116	2.35601	82.5962	-53.0273	-10.4281	-56.4108	-9.20116	645.797
DCM93508	-9.50536	1.97429	-43.2002	-49.4032	-8.59195	-52.9282	-9.50536	602.817
DCM93560	-9.47829	2.2615	-23.8281	-58.6307	-9.19472	-53.8037	-9.47829	594.756
DCM93563	-9.01754	3.14155	-13.0962	-45.6682	-8.88945	-53.3555	-9.01754	566.702
DCM93574	-8.44928	1.21387	-117.583	-82.5942	-10.7618	-41.0933	-8.44928	505.659
DCM93597	-7.86536	1.30326	-75.8577	-85.5306	-10.1495	-48.533	-7.86536	435.446
DCM93630	-8.65941	3.04439	-89.2716	-85.8908	-10.2908	-48.4801	-8.65941	523.677
DCM93636	-8.47403	1.52389	-54.4029	-96.7656	-9.95125	-42.7786	-8.47403	425.553
DCM93637	-8.82521	1.15286	-55.9753	-85.6391	-10.781	-49.5826	-8.82521	469.585
DCM93667	-8.85057	1.57329	96.0438	-71.0531	-11.2565	-52.2363	-8.85057	552.675
DCM93678	-9.39518	1.7845	-39.321	-67.5612	-8.501	-51.8574	-9.39518	650.861
DCM93682	-9.85895	1.87207	58.4662	-59.0398	-9.34806	-52.3995	-9.85895	630.871
DCM93699	-9.1539	1.7913	-146.305	-73.5475	-9.46473	-53.605	-9.1539	520.674
DCM93909	-7.252	2.41458	86.1911	-47.9261	-9.39809	-43.0117	-7.252	388.433
DCM94086	-8.96969	1.88681	-64.1383	-96.7575	-9.59744	-51.5862	-8.96969	549.715
DCM94188	-6.93622	1.32317	-59.0738	-85.427	-10.613	-35.8887	-6.93622	326.327
DCM9431	-8.22978	1.76119	104.277	-72.4101	-9.30966	-49.629	-8.22978	399.603
DCM94549	-7.67424	2.7221	-12.0094	-75.7229	-9.95357	-41.9168	-7.67424	346.427
DCM947	-8.56073	1.54803	-117.546	-86.5699	-10.8575	-52.5866	-8.56073	504.584
DCM94858	-7.63746	1.89308	-81.3784	-81.3456	-10.5352	-44.0036	-7.63746	376.453
DCM9534	-6.93986	2.38438	-97.4685	-85.8236	-9.53191	-37.4866	-6.93986	312.369
DCM95420	-6.9552	0.986581	-21.6181	-66.4129	-10.1846	-35.168	-6.9552	297.318
DCM9561	-7.08341	1.28864	101.368	-72.6337	-9.7815	-37.5269	-7.08341	332.4
DCM95987	-6.94952	2.52944	-44.9222	-52.8548	-9.57864	-38.4964	-6.94952	308.356
DCM97265	-6.75843	1.1219	-60.0316	-53.852	-9.25352	-31.2521	-6.4973	260.337
DCM97267	-7.63921	1.53895	-21.6517	-67.9605	-9.78707	-44.8339	-7.63921	325.408
DCM9740	-7.95965	2.97546	0.0318234	-85.9401	-9.99206	-46.1746	-7.95965	466.582
DCM9744	-8.79535	1.7735	-35.309	-76.5391	-10.6211	-53.384	-8.79535	506.559
DCM98164	-7.54452	2.36152	16.7557	-59.3231	-9.33166	-39.7569	-7.54452	316.376
DCM98237	-7.03798	0.993317	-80.4792	-63.9077	-10.1294	-39.5746	-7.03798	415.489
DCM98443	-6.87949	1.50059	-49.6172	-82.7581	-10.7101	-38.9941	-6.87949	342.395
DCM9847	-6.6639	0.727904	-89.6278	-56.4119	-9.34081	-32.044	-6.6639	344.333
DCM98629	-7.69115	1.62598	-65.0331	-47.1088	-9.43292	-39.865	-7.69115	444.987
DCM98937	-6.56478	1.2563	10.4647	-67.2335	-9.85685	-35.6577	-6.56478	271.276
DCM98946	-7.16731	2.2196	-83.6191	-85.2374	-10.2294	-36.924	-7.16731	389.814
[truncated: 10 more rows]

## Sheet: hits_Vina_5N5O
ID	S_Vina_5N5O
DBB10063	-5.2
[truncated: 897 more rows]

## Sheet: hits_Vina_6LU7
ID	S_Vina_6LU7
[truncated: 898 more rows]

[truncated: 5 more sheets: hits_ML_predictions, FooDB_consensus_hits, DCM_consensus_hits, FooDB_datafusion_similarity, DCM_datafusion_similarity]
