# Supplementary material for: Consensus virtual screening of dark chemical matter and food chemicals uncover potential inhibitors of SARS-CoV-2 main protease
Source: Royal Society of Chemistry journal article supplement (doi:10.1039/d0ra04922k), 2020-01-01
Supplement: d0ra04922k2.sdf [file d0ra04922k2.sdf]

CID2741
Actelion Java MolfileCreator 2.0

  0  0  0  0  0  0              0 V3000
M  V30 BEGIN CTAB
M  V30 COUNTS 14 15 0 0 0
M  V30 BEGIN ATOM
M  V30 1 O 3.8971 -4.5 0.0 0
M  V30 2 C 3.8971 -3.0 0.0 0
M  V30 3 C 5.1961 -2.25 0.0 0
M  V30 4 C 2.598 -2.25 0.0 0
M  V30 5 C 5.1961 -0.75 0.0 0
M  V30 6 C 6.4951 -3.0 0.0 0
M  V30 7 C 2.598 -0.75 0.0 0
M  V30 8 O 3.8971 0.0 0.0 0
M  V30 9 C 6.4951 0.0 0.0 0
M  V30 10 C 7.7942 -2.25 0.0 0
M  V30 11 C 1.299 0.0 0.0 0
M  V30 12 C 7.7942 -0.75 0.0 0
M  V30 13 O 1.299 1.5 0.0 0
M  V30 14 O 0.0 -0.75 0.0 0
M  V30 END ATOM
M  V30 BEGIN BOND
M  V30 1 2 1 2
M  V30 2 1 2 3
M  V30 3 1 2 4
M  V30 4 2 3 5
M  V30 5 1 3 6
M  V30 6 2 4 7
M  V30 7 1 5 8
M  V30 8 1 5 9
M  V30 9 2 6 10
M  V30 10 1 7 11
M  V30 11 2 9 12
M  V30 12 2 11 13
M  V30 13 1 11 14
M  V30 14 1 7 8
M  V30 15 1 10 12
M  V30 END BOND
M  V30 END CTAB
M  END
>  <ID>
CID2741

>  <name>
chromocarb

>  <smiles>
c1ccc2c(c1)c(=O)cc(o2)C(=O)O

$$$$
CID37542
Actelion Java MolfileCreator 2.0

  0  0  0  0  0  0              0 V3000
M  V30 BEGIN CTAB
M  V30 COUNTS 17 18 0 0 0
M  V30 BEGIN ATOM
M  V30 1 O 1.732 -0.5 0.0 0
M  V30 2 C 0.866 0.0 0.0 0
M  V30 3 N 0.866 1.0 0.0 0
M  V30 4 C 0.0 -0.5 0.0 0
M  V30 5 N -0.9135 -0.0932 0.0 0
M  V30 6 N -0.1045 -1.4945 0.0 0
M  V30 7 N -1.5826 -0.8364 0.0 0
M  V30 8 C -1.0826 -1.7024 0.0 0
M  V30 9 C -2.5771 -0.7318 0.0 0 CFG=2
M  V30 10 O -3.0771 0.1341 0.0 0
M  V30 11 C -3.2463 -1.475 0.0 0 CFG=2
M  V30 12 C -4.0553 -0.0737 0.0 0 CFG=1
M  V30 13 O -3.0384 -2.4531 0.0 0
M  V30 14 C -4.1598 -1.0682 0.0 0 CFG=1
M  V30 15 C -4.7984 0.5953 0.0 0
M  V30 16 O -5.0258 -1.5682 0.0 0
M  V30 17 O -5.7495 0.2863 0.0 0
M  V30 END ATOM
M  V30 BEGIN BOND
M  V30 1 2 1 2
M  V30 2 1 2 3
M  V30 3 1 2 4
M  V30 4 2 4 5
M  V30 5 1 4 6
M  V30 6 1 5 7
M  V30 7 2 6 8
M  V30 8 1 9 7 CFG=1
M  V30 9 1 9 10
M  V30 10 1 11 9
M  V30 11 1 12 10
M  V30 12 1 11 13 CFG=3
M  V30 13 1 14 11
M  V30 14 1 12 15 CFG=1
M  V30 15 1 14 16 CFG=3
M  V30 16 1 15 17
M  V30 17 1 7 8
M  V30 18 1 12 14
M  V30 END BOND
M  V30 BEGIN COLLECTION
M  V30 MDLV30/STEABS ATOMS=(4 9 11 12 14)
M  V30 END COLLECTION
M  V30 END CTAB
M  END
>  <ID>
CID37542

>  <name>
ribavirin

>  <smiles>
c1nc(nn1[C@H]2[C@@H]([C@@H]([C@H](O2)CO)O)O)C(=O)N

$$$$
CID159269
Actelion Java MolfileCreator 2.0

  0  0  0  0  0  0              0 V3000
M  V30 BEGIN CTAB
M  V30 COUNTS 17 18 0 0 0
M  V30 BEGIN ATOM
M  V30 1 O 4.1282 0.9906 0.0 0
M  V30 2 C 4.7159 0.1816 0.0 0
M  V30 3 N 4.3092 -0.7318 0.0 0
M  V30 4 N 5.7105 0.2861 0.0 0
M  V30 5 C 4.897 -1.5408 0.0 0
M  V30 6 C 3.3147 -0.8364 0.0 0 CFG=1
M  V30 7 C 6.2982 -0.5228 0.0 0
M  V30 8 C 5.8915 -1.4363 0.0 0
M  V30 9 O 2.6455 -0.0932 0.0 0
M  V30 10 C 2.8147 -1.7024 0.0 0
M  V30 11 O 7.2928 -0.4182 0.0 0
M  V30 12 C 6.4793 -2.2453 0.0 0
M  V30 13 C 1.732 -0.5 0.0 0 CFG=2
M  V30 14 C 1.8365 -1.4945 0.0 0 CFG=2
M  V30 15 C 0.866 0.0 0.0 0
M  V30 16 O 1.0934 -2.1636 0.0 0
M  V30 17 O 0.0 -0.5 0.0 0
M  V30 END ATOM
M  V30 BEGIN BOND
M  V30 1 2 1 2
M  V30 2 1 2 3
M  V30 3 1 2 4
M  V30 4 1 3 5
M  V30 5 1 6 3 CFG=3
M  V30 6 1 4 7
M  V30 7 2 5 8
M  V30 8 1 6 9
M  V30 9 1 6 10
M  V30 10 2 7 11
M  V30 11 1 8 12
M  V30 12 1 13 9
M  V30 13 1 14 10
M  V30 14 1 13 15 CFG=3
M  V30 15 1 14 16 CFG=1
M  V30 16 1 15 17
M  V30 17 1 7 8
M  V30 18 1 13 14
M  V30 END BOND
M  V30 BEGIN COLLECTION
M  V30 MDLV30/STEABS ATOMS=(3 6 13 14)
M  V30 END COLLECTION
M  V30 END CTAB
M  END
>  <ID>
CID159269

>  <name>
telbivudine

>  <smiles>
Cc1cn(c(=O)[nH]c1=O)[C@@H]2C[C@H]([C@@H](O2)CO)O

$$$$
CID5311498
Actelion Java MolfileCreator 2.0

  0  0  0  0  0  0              0 V3000
M  V30 BEGIN CTAB
M  V30 COUNTS 90 97 0 0 0
M  V30 BEGIN ATOM
M  V30 1 P 3.4641 5.4999 0.0 0
M  V30 2 O 2.4641 5.4999 0.0 0
M  V30 3 O 4.3301 5.9999 0.0 0
M  V30 4 O 3.4641 4.4999 0.0 0
M  V30 5 O 2.9641 6.366 0.0 0 VAL=1
M  V30 6 C 4.3301 6.9999 0.0 0 CFG=1
M  V30 7 C 2.598 3.9999 0.0 0 CFG=1
M  V30 8 C 3.5211 7.5877 0.0 0 CFG=1
M  V30 9 C 5.1391 7.5877 0.0 0 CFG=2
M  V30 10 C 2.598 3.0 0.0 0
M  V30 11 C 1.732 4.4999 0.0 0
M  V30 12 O 2.57 7.2787 0.0 0
M  V30 13 C 3.8301 8.5388 0.0 0 CFG=2
M  V30 14 O 4.8301 8.5388 0.0 0
M  V30 15 C 6.0902 7.2787 0.0 0
M  V30 16 N 1.732 2.4999 0.0 0
M  V30 17 N 3.2423 9.3478 0.0 0
M  V30 18 O 6.2981 6.3006 0.0 0
M  V30 19 C 1.732 1.4999 0.0 0
M  V30 20 C 2.2423 9.3478 0.0 0
M  V30 21 C 3.5513 10.2989 0.0 0
M  V30 22 O 2.598 0.9999 0.0 0
M  V30 23 C 0.866 0.9999 0.0 0
M  V30 24 C 1.9333 10.2989 0.0 0
M  V30 25 C 1.5732 8.6047 0.0 0
M  V30 26 N 2.7423 10.8867 0.0 0
M  V30 27 C 0.866 0.0 0.0 0
M  V30 28 C 0.9551 10.5068 0.0 0
M  V30 29 C 0.595 8.8126 0.0 0
M  V30 30 C 0.0 -0.5 0.0 0 CFG=1
M  V30 31 C 0.286 9.7636 0.0 0
M  V30 32 C -0.074 8.0694 0.0 0
M  V30 33 C -0.9135 -0.0932 0.0 0
M  V30 34 C -0.1045 -1.4945 0.0 0 CFG=2
M  V30 35 C 0.8386 -1.0446 0.0 0
M  V30 36 C -0.6921 9.9715 0.0 0
M  V30 37 N -1.5826 -0.8364 0.0 0
M  V30 38 C -1.5217 0.9542 0.0 0
M  V30 39 C -1.0826 -1.7024 0.0 0 CFG=1
M  V30 40 C 0.6386 -2.1636 0.0 0
M  V30 41 C -2.4999 1.6686 0.0 0
M  V30 42 C -0.7786 1.6233 0.0 0
M  V30 43 C -2.0345 -2.7595 0.0 0 CFG=2
M  V30 44 C 1.5896 -1.8546 0.0 0
M  V30 45 N -3.3089 1.0808 0.0 0
M  V30 46 C -2.8089 2.6196 0.0 0 CFG=2
M  V30 47 N -2.948 -2.3528 0.0 0
M  V30 48 C -2.139 -3.754 0.0 0 CFG=2
M  V30 49 C -1.1209 -3.1663 0.0 0
M  V30 50 O 1.7975 -0.8764 0.0 0
M  V30 51 N 2.3328 -2.5237 0.0 0
M  V30 52 C -4.1179 1.6686 0.0 0
M  V30 53 C -3.8089 2.6196 0.0 0
M  V30 54 C -2.2211 3.4286 0.0 0
M  V30 55 C -3.6172 -3.0959 0.0 0
M  V30 56 C -3.1172 -3.962 0.0 0 CFG=1
M  V30 57 C -1.3959 -4.4232 0.0 0
M  V30 58 C -2.3978 -4.72 0.0 0
M  V30 59 C -5.0961 0.9542 0.0 0
M  V30 60 C -3.9134 3.6141 0.0 0
M  V30 61 C -4.7224 3.0263 0.0 0
M  V30 62 C -2.6279 4.3422 0.0 0
M  V30 63 C -4.7225 -2.6005 0.0 0
M  V30 64 C -3.5239 -4.8755 0.0 0
M  V30 65 C -1.6038 -5.4013 0.0 0
M  V30 66 C -5.7043 -0.0932 0.0 0
M  V30 67 C -2.0401 5.1512 0.0 0
M  V30 68 C -5.5352 -1.7024 0.0 0
M  V30 69 C -5.3102 -3.4095 0.0 0
M  V30 70 C -4.5184 -4.98 0.0 0
M  V30 71 O -0.8606 -6.0704 0.0 0
M  V30 72 N -2.5548 -5.7103 0.0 0
M  V30 73 N -5.0352 -0.8364 0.0 0
M  V30 74 C -6.6179 -0.4999 0.0 0 CFG=2
M  V30 75 O -1.0456 5.0467 0.0 0
M  V30 76 N -2.4468 6.0647 0.0 0
M  V30 77 C -6.5133 -1.4945 0.0 0 CFG=2
M  V30 78 C -4.9251 -5.8936 0.0 0
M  V30 79 C -7.4839 0.0 0.0 0
M  V30 80 C -7.2565 -2.1636 0.0 0
M  V30 81 C -6.2545 -2.4604 0.0 0
M  V30 82 O -4.3374 -6.7026 0.0 0
M  V30 83 N -5.9197 -5.9981 0.0 0
M  V30 84 C -7.4839 1.0 0.0 0
M  V30 85 C -8.2075 -1.8546 0.0 0
M  V30 86 C -8.3499 1.5 0.0 0
M  V30 87 O -8.9507 -2.5237 0.0 0
M  V30 88 N -8.4155 -0.8764 0.0 0
M  V30 89 O -9.216 1.0 0.0 0
M  V30 90 N -8.3499 2.5 0.0 0
M  V30 END ATOM
M  V30 BEGIN BOND
M  V30 1 2 1 2
M  V30 2 1 1 3
M  V30 3 1 1 4
M  V30 4 1 1 5
M  V30 5 1 6 3 CFG=1
M  V30 6 1 7 4 CFG=1
M  V30 7 1 8 6
M  V30 8 1 9 6
M  V30 9 1 7 10
M  V30 10 1 7 11
M  V30 11 1 8 12 CFG=1
M  V30 12 1 13 8
M  V30 13 1 9 14
M  V30 14 1 9 15 CFG=3
M  V30 15 1 10 16
M  V30 16 1 13 17 CFG=1
M  V30 17 1 15 18
M  V30 18 1 16 19
M  V30 19 1 17 20
M  V30 20 1 17 21
M  V30 21 2 19 22
M  V30 22 1 19 23
M  V30 23 2 20 24
M  V30 24 1 20 25
M  V30 25 2 21 26
M  V30 26 1 23 27
M  V30 27 1 24 28
M  V30 28 2 25 29
M  V30 29 1 30 27
M  V30 30 2 28 31
M  V30 31 1 29 32
M  V30 32 1 30 33
M  V30 33 1 34 30
M  V30 34 1 30 35 CFG=1
M  V30 35 1 31 36
M  V30 36 2 33 37
M  V30 37 1 33 38
M  V30 38 1 39 34
M  V30 39 1 34 40 CFG=1
M  V30 40 2 38 41 CFG=2
M  V30 41 1 38 42
M  V30 42 1 43 39
M  V30 43 1 40 44
M  V30 44 1 41 45
M  V30 45 1 46 41
M  V30 46 1 43 47
M  V30 47 1 48 43
M  V30 48 1 43 49 CFG=3
M  V30 49 2 44 50
M  V30 50 1 44 51
M  V30 51 2 45 52
M  V30 52 1 46 53
M  V30 53 1 46 54 CFG=3
M  V30 54 1 47 55
M  V30 55 1 56 48
M  V30 56 1 48 57
M  V30 57 1 48 58 CFG=3
M  V30 58 1 52 59
M  V30 59 1 53 60
M  V30 60 1 53 61
M  V30 61 1 54 62
M  V30 62 2 55 63 CFG=2
M  V30 63 1 56 64 CFG=3
M  V30 64 1 57 65
M  V30 65 2 59 66 CFG=2
M  V30 66 1 62 67
M  V30 67 1 63 68
M  V30 68 1 63 69
M  V30 69 1 64 70
M  V30 70 2 65 71
M  V30 71 1 65 72
M  V30 72 1 66 73
M  V30 73 1 74 66
M  V30 74 2 67 75
M  V30 75 1 67 76
M  V30 76 1 77 68
M  V30 77 1 70 78
M  V30 78 1 74 79 CFG=3
M  V30 79 1 77 80
M  V30 80 1 77 81 CFG=3
M  V30 81 2 78 82
M  V30 82 1 78 83
M  V30 83 1 79 84
M  V30 84 1 80 85
M  V30 85 1 84 86
M  V30 86 2 85 87
M  V30 87 1 85 88
M  V30 88 2 86 89
M  V30 89 1 86 90
M  V30 90 1 13 14
M  V30 91 1 24 26
M  V30 92 1 29 31
M  V30 93 1 39 37 CFG=3
M  V30 94 1 52 53
M  V30 95 1 55 56
M  V30 96 2 68 73
M  V30 97 1 74 77
M  V30 END BOND
M  V30 BEGIN COLLECTION
M  V30 MDLV30/STEABS ATOMS=(14 6 7 8 9 13 30 34 39 43 46 48 56 74 77)
M  V30 END COLLECTION
M  V30 END CTAB
M  END
>  <ID>
CID5311498

>  <name>
vitamin B12

>  <smiles>
Cc1cc2c(cc1C)n(cn2)[C@@H]3[C@@H]([C@@H]([C@H](O3)CO)OP(=O)([O])O[C@H](C)CNC(=O)CC[C@@]4([C@H]([C@@H]5[C@]6([C@@]([C@@H](C(=C(C7=NC(=CC8=NC(=C(C4=N5)C)[C@H](C8(C)C)CCC(=O)N)[C@H]([C@]7(C)CC(=O)N)CCC(=O)N)C)N6)CCC(=O)N)(C)CC(=O)N)C)CC(=O)N)C)O

$$$$
CID9433
Actelion Java MolfileCreator 2.0

  0  0  0  0  0  0              0 V3000
M  V30 BEGIN CTAB
M  V30 COUNTS 13 14 0 0 0
M  V30 BEGIN ATOM
M  V30 1 O 0.866 0.0 0.0 0
M  V30 2 C 0.0 -0.5 0.0 0
M  V30 3 N -0.866 0.0 0.0 0
M  V30 4 N 0.0 -1.4999 0.0 0
M  V30 5 C -1.732 -0.4999 0.0 0
M  V30 6 C -0.866 1.0 0.0 0
M  V30 7 C -0.866 -1.9999 0.0 0
M  V30 8 C 0.866 -1.9999 0.0 0
M  V30 9 O -2.598 0.0 0.0 0
M  V30 10 C -1.732 -1.4999 0.0 0
M  V30 11 N -1.0739 -2.9781 0.0 0
M  V30 12 N -2.4751 -2.1691 0.0 0
M  V30 13 C -2.0684 -3.0826 0.0 0
M  V30 END ATOM
M  V30 BEGIN BOND
M  V30 1 2 1 2
M  V30 2 1 2 3
M  V30 3 1 2 4
M  V30 4 1 3 5
M  V30 5 1 3 6
M  V30 6 1 4 7
M  V30 7 1 4 8
M  V30 8 2 5 9
M  V30 9 1 5 10
M  V30 10 1 7 11
M  V30 11 1 10 12
M  V30 12 2 11 13
M  V30 13 2 7 10
M  V30 14 1 12 13
M  V30 END BOND
M  V30 END CTAB
M  END
>  <ID>
CID9433

>  <name>
aminophylline

>  <smiles>
Cn1c2c(c(=O)n(c1=O)C)[nH]cn2

$$$$
CID936
Actelion Java MolfileCreator 2.0

  0  0  0  0  0  0              0 V3000
M  V30 BEGIN CTAB
M  V30 COUNTS 9 9 0 0 0
M  V30 BEGIN ATOM
M  V30 1 O 2.598 -0.75 0.0 0
M  V30 2 C 1.299 0.0 0.0 0
M  V30 3 N 1.299 1.5 0.0 0
M  V30 4 C 0.0 -0.75 0.0 0
M  V30 5 C -1.299 0.0 0.0 0
M  V30 6 C 0.0 -2.25 0.0 0
M  V30 7 N -2.598 -0.7499 0.0 0
M  V30 8 C -1.299 -2.9999 0.0 0
M  V30 9 C -2.598 -2.2499 0.0 0
M  V30 END ATOM
M  V30 BEGIN BOND
M  V30 1 2 1 2
M  V30 2 1 2 3
M  V30 3 1 2 4
M  V30 4 2 4 5
M  V30 5 1 4 6
M  V30 6 1 5 7
M  V30 7 2 6 8
M  V30 8 2 7 9
M  V30 9 1 8 9
M  V30 END BOND
M  V30 END CTAB
M  END
>  <ID>
CID936

>  <name>
nicotinamide

>  <smiles>
c1cc(cnc1)C(=O)N

$$$$
CID9458
Actelion Java MolfileCreator 2.0

  0  0  0  0  0  0              0 V3000
M  V30 BEGIN CTAB
M  V30 COUNTS 17 17 0 0 0
M  V30 BEGIN ATOM
M  V30 1 F 2.4641 2.5 0.0 0
M  V30 2 C 3.4641 2.5 0.0 0
M  V30 3 F 3.4641 3.5 0.0 0
M  V30 4 F 4.4641 2.5 0.0 0
M  V30 5 C 3.4641 1.5 0.0 0
M  V30 6 C 2.598 1.0 0.0 0
M  V30 7 C 4.3301 1.0 0.0 0
M  V30 8 C 2.598 0.0 0.0 0
M  V30 9 C 4.3301 0.0 0.0 0
M  V30 10 O 1.732 -0.5 0.0 0
M  V30 11 C 3.4641 -0.4999 0.0 0
M  V30 12 C 0.866 0.0 0.0 0
M  V30 13 C 3.4641 -1.5 0.0 0
M  V30 14 O 0.866 1.0 0.0 0
M  V30 15 C 0.0 -0.5 0.0 0
M  V30 16 O 2.598 -2.0 0.0 0
M  V30 17 O 4.3301 -2.0 0.0 0
M  V30 END ATOM
M  V30 BEGIN BOND
M  V30 1 1 1 2
M  V30 2 1 2 3
M  V30 3 1 2 4
M  V30 4 1 2 5
M  V30 5 2 5 6
M  V30 6 1 5 7
M  V30 7 1 6 8
M  V30 8 2 7 9
M  V30 9 1 8 10
M  V30 10 2 8 11
M  V30 11 1 10 12
M  V30 12 1 11 13
M  V30 13 2 12 14
M  V30 14 1 12 15
M  V30 15 2 13 16
M  V30 16 1 13 17
M  V30 17 1 9 11
M  V30 END BOND
M  V30 END CTAB
M  END
>  <ID>
CID9458

>  <name>
triflusal

>  <smiles>
CC(=O)Oc1c(ccc(c1)C(F)(F)F)C(=O)O

$$$$
CID2310
Actelion Java MolfileCreator 2.0

  0  0  0  0  0  0              0 V3000
M  V30 BEGIN CTAB
M  V30 COUNTS 11 11 0 0 0
M  V30 BEGIN ATOM
M  V30 1 O -3.8971 0.0 0.0 0
M  V30 2 C -2.598 -0.7499 0.0 0
M  V30 3 N -2.598 -2.2499 0.0 0
M  V30 4 C -1.299 0.0 0.0 0
M  V30 5 C -1.299 -2.9999 0.0 0
M  V30 6 C 0.0 -0.75 0.0 0
M  V30 7 O -1.299 -4.4999 0.0 0
M  V30 8 C 0.0 -2.25 0.0 0
M  V30 9 C 1.299 0.0 0.0 0
M  V30 10 C 1.299 -1.5 0.0 0
M  V30 11 C 2.598 -0.75 0.0 0
M  V30 END ATOM
M  V30 BEGIN BOND
M  V30 1 2 1 2
M  V30 2 1 2 3
M  V30 3 1 2 4
M  V30 4 1 3 5
M  V30 5 1 4 6
M  V30 6 2 5 7
M  V30 7 1 5 8
M  V30 8 1 6 9
M  V30 9 1 6 10
M  V30 10 1 9 11
M  V30 11 1 6 8
M  V30 END BOND
M  V30 END CTAB
M  END
>  <ID>
CID2310

>  <name>
bemegride

>  <smiles>
CCC1(CC(=O)NC(=O)C1)C

$$$$
CID 2724368
Actelion Java MolfileCreator 2.0

  0  0  0  0  0  0              0 V3000
M  V30 BEGIN CTAB
M  V30 COUNTS 11 11 0 0 0
M  V30 BEGIN ATOM
M  V30 1 O 2.598 -0.75 0.0 0
M  V30 2 C 1.299 0.0 0.0 0
M  V30 3 O 1.299 1.5 0.0 0 VAL=1
M  V30 4 C 0.0 -0.75 0.0 0
M  V30 5 C -1.299 0.0 0.0 0
M  V30 6 C 0.0 -2.2499 0.0 0
M  V30 7 O -1.299 1.5 0.0 0
M  V30 8 C -2.598 -0.7499 0.0 0
M  V30 9 C -1.299 -2.9999 0.0 0
M  V30 10 C -2.598 -2.2499 0.0 0
M  V30 11 N -3.8971 -2.9999 0.0 0
M  V30 END ATOM
M  V30 BEGIN BOND
M  V30 1 2 1 2
M  V30 2 1 2 3
M  V30 3 1 2 4
M  V30 4 2 4 5
M  V30 5 1 4 6
M  V30 6 1 5 7
M  V30 7 1 5 8
M  V30 8 2 6 9
M  V30 9 2 8 10
M  V30 10 1 10 11
M  V30 11 1 9 10
M  V30 END BOND
M  V30 END CTAB
M  END
>  <ID>
CID 2724368

>  <name>
aminosalicylate Sodium

>  <smiles>
c1cc(c(cc1N)O)C(=O)[O]

$$$$
CID1046
Actelion Java MolfileCreator 2.0

  0  0  0  0  0  0              0 V3000
M  V30 BEGIN CTAB
M  V30 COUNTS 9 9 0 0 0
M  V30 BEGIN ATOM
M  V30 1 O 2.598 -0.75 0.0 0
M  V30 2 C 1.299 0.0 0.0 0
M  V30 3 N 1.299 1.5 0.0 0
M  V30 4 C 0.0 -0.75 0.0 0
M  V30 5 N -1.299 0.0 0.0 0
M  V30 6 C 0.0 -2.25 0.0 0
M  V30 7 C -2.598 -0.7499 0.0 0
M  V30 8 N -1.299 -2.9999 0.0 0
M  V30 9 C -2.598 -2.2499 0.0 0
M  V30 END ATOM
M  V30 BEGIN BOND
M  V30 1 2 1 2
M  V30 2 1 2 3
M  V30 3 1 2 4
M  V30 4 2 4 5
M  V30 5 1 4 6
M  V30 6 1 5 7
M  V30 7 2 6 8
M  V30 8 2 7 9
M  V30 9 1 8 9
M  V30 END BOND
M  V30 END CTAB
M  END
>  <ID>
CID1046

>  <name>
pyrazinamide

>  <smiles>
c1cnc(cn1)C(=O)N

$$$$
CID5394
Actelion Java MolfileCreator 2.0

  0  0  0  0  0  0              0 V3000
M  V30 BEGIN CTAB
M  V30 COUNTS 14 15 0 0 0
M  V30 BEGIN ATOM
M  V30 1 O 7.443 -2.0574 0.0 0
M  V30 2 C 6.4393 -0.9427 0.0 0
M  V30 3 N 6.9028 0.4838 0.0 0
M  V30 4 N 4.972 -1.2546 0.0 0
M  V30 5 N 5.8991 1.5985 0.0 0
M  V30 6 C 8.37 0.7957 0.0 0
M  V30 7 C 3.9683 -0.1398 0.0 0
M  V30 8 C 4.222 -2.5536 0.0 0
M  V30 9 N 4.4319 1.2866 0.0 0
M  V30 10 C 2.598 -0.75 0.0 0
M  V30 11 N 2.7548 -2.2417 0.0 0
M  V30 12 C 1.299 0.0 0.0 0
M  V30 13 O 1.299 1.5 0.0 0
M  V30 14 N 0.0 -0.75 0.0 0
M  V30 END ATOM
M  V30 BEGIN BOND
M  V30 1 2 1 2
M  V30 2 1 2 3
M  V30 3 1 2 4
M  V30 4 1 3 5
M  V30 5 1 3 6
M  V30 6 1 4 7
M  V30 7 1 4 8
M  V30 8 2 5 9
M  V30 9 2 7 10
M  V30 10 2 8 11
M  V30 11 1 10 12
M  V30 12 2 12 13
M  V30 13 1 12 14
M  V30 14 1 7 9
M  V30 15 1 10 11
M  V30 END BOND
M  V30 END CTAB
M  END
>  <ID>
CID5394

>  <name>
temozolomide

>  <smiles>
Cn1c(=O)n2cnc(c2nn1)C(=O)N

$$$$
CID4100
Actelion Java MolfileCreator 2.0

  0  0  0  0  0  0              0 V3000
M  V30 BEGIN CTAB
M  V30 COUNTS 14 14 0 0 0
M  V30 BEGIN ATOM
M  V30 1 S 4.0874 2.1159 0.0 0
M  V30 2 O 5.001 1.7092 0.0 0
M  V30 3 O 3.1739 2.5227 0.0 0
M  V30 4 N 4.4942 3.0295 0.0 0
M  V30 5 C 3.6807 1.2024 0.0 0
M  V30 6 S 2.7026 0.9945 0.0 0
M  V30 7 N 4.1807 0.3364 0.0 0
M  V30 8 C 2.598 0.0 0.0 0
M  V30 9 N 3.5116 -0.4067 0.0 0
M  V30 10 N 1.732 -0.5 0.0 0
M  V30 11 C 3.7195 -1.3848 0.0 0
M  V30 12 C 0.866 0.0 0.0 0
M  V30 13 O 0.866 1.0 0.0 0
M  V30 14 C 0.0 -0.5 0.0 0
M  V30 END ATOM
M  V30 BEGIN BOND
M  V30 1 2 1 2
M  V30 2 2 1 3
M  V30 3 1 1 4
M  V30 4 1 1 5
M  V30 5 1 5 6
M  V30 6 2 5 7
M  V30 7 1 6 8
M  V30 8 1 7 9
M  V30 9 2 8 10 CFG=2
M  V30 10 1 9 11
M  V30 11 1 10 12
M  V30 12 2 12 13
M  V30 13 1 12 14
M  V30 14 1 8 9
M  V30 END BOND
M  V30 END CTAB
M  END
>  <ID>
CID4100

>  <name>
methazolamide

>  <smiles>
CC(=O)N=c1n(nc(s1)S(=O)(=O)N)C

$$$$
CID72139
Actelion Java MolfileCreator 2.0

  0  0  0  0  0  0              0 V3000
M  V30 BEGIN CTAB
M  V30 COUNTS 11 12 0 0 0
M  V30 BEGIN ATOM
M  V30 1 S 0.9705 0.9945 0.0 0
M  V30 2 C 0.866 0.0 0.0 0
M  V30 3 C 1.9487 1.2024 0.0 0
M  V30 4 O 0.0 -0.5 0.0 0
M  V30 5 O 1.7795 -0.4067 0.0 0
M  V30 6 C 2.4487 0.3364 0.0 0
M  V30 7 C 2.4487 2.0684 0.0 0
M  V30 8 C 3.4487 0.3364 0.0 0
M  V30 9 C 3.4487 2.0684 0.0 0
M  V30 10 C 3.9487 1.2024 0.0 0
M  V30 11 O 4.9487 1.2024 0.0 0
M  V30 END ATOM
M  V30 BEGIN BOND
M  V30 1 1 1 2
M  V30 2 1 1 3
M  V30 3 2 2 4
M  V30 4 1 2 5
M  V30 5 2 3 6
M  V30 6 1 3 7
M  V30 7 1 6 8
M  V30 8 2 7 9
M  V30 9 2 8 10
M  V30 10 1 10 11
M  V30 11 1 5 6
M  V30 12 1 9 10
M  V30 END BOND
M  V30 END CTAB
M  END
>  <ID>
CID72139

>  <name>
tioxolone

>  <smiles>
c1cc2c(cc1O)oc(=O)s2

$$$$
CID657298
Actelion Java MolfileCreator 2.0

  0  0  0  0  0  0              0 V3000
M  V30 BEGIN CTAB
M  V30 COUNTS 11 11 0 0 0
M  V30 BEGIN ATOM
M  V30 1 S 5.1961 -0.5 0.0 0
M  V30 2 C 4.3301 0.0 0.0 0
M  V30 3 N 4.3301 1.0 0.0 0
M  V30 4 N 3.4641 -0.4999 0.0 0
M  V30 5 C 3.4641 1.5 0.0 0
M  V30 6 C 2.598 0.0 0.0 0
M  V30 7 O 3.4641 2.5 0.0 0
M  V30 8 C 2.598 1.0 0.0 0
M  V30 9 C 1.732 -0.5 0.0 0
M  V30 10 C 0.866 0.0 0.0 0
M  V30 11 C 0.0 -0.5 0.0 0
M  V30 END ATOM
M  V30 BEGIN BOND
M  V30 1 2 1 2
M  V30 2 1 2 3
M  V30 3 1 2 4
M  V30 4 1 3 5
M  V30 5 1 4 6
M  V30 6 2 5 7
M  V30 7 1 5 8
M  V30 8 1 6 9
M  V30 9 1 9 10
M  V30 10 1 10 11
M  V30 11 2 6 8
M  V30 END BOND
M  V30 END CTAB
M  END
>  <ID>
CID657298

>  <name>
propylthiouracil

>  <smiles>
CCCc1cc(=O)[nH]c(=S)[nH]1

$$$$
CID6058
Actelion Java MolfileCreator 2.0

  0  0  0  0  0  0              0 V3000
M  V30 BEGIN CTAB
M  V30 COUNTS 4 3 0 0 0
M  V30 BEGIN ATOM
M  V30 1 S 2.598 0.0 0.0 0
M  V30 2 C 1.732 -0.5 0.0 0
M  V30 3 C 0.866 0.0 0.0 0
M  V30 4 N 0.0 -0.5 0.0 0
M  V30 END ATOM
M  V30 BEGIN BOND
M  V30 1 1 1 2
M  V30 2 1 2 3
M  V30 3 1 3 4
M  V30 END BOND
M  V30 END CTAB
M  END
>  <ID>
CID6058

>  <name>
cysteamine

>  <smiles>
C(CS)N

$$$$
CID6082
Actelion Java MolfileCreator 2.0

  0  0  0  0  0  0              0 V3000
M  V30 BEGIN CTAB
M  V30 COUNTS 15 15 0 0 0
M  V30 BEGIN ATOM
M  V30 1 O 2.598 2.25 0.0 0
M  V30 2 C 3.8971 1.5 0.0 0
M  V30 3 C 1.299 1.5 0.0 0
M  V30 4 C 3.8971 0.0 0.0 0
M  V30 5 C 5.1961 2.25 0.0 0
M  V30 6 C 5.1961 -0.75 0.0 0
M  V30 7 C 2.598 -0.75 0.0 0
M  V30 8 C 6.4951 1.5 0.0 0
M  V30 9 C 6.4951 0.0 0.0 0
M  V30 10 O 1.299 0.0 0.0 0
M  V30 11 C 2.598 -2.25 0.0 0
M  V30 12 O 7.7942 -0.75 0.0 0
M  V30 13 N 3.8971 -3.0 0.0 0
M  V30 14 C 1.299 -3.0 0.0 0
M  V30 15 C 9.0932 0.0 0.0 0
M  V30 END ATOM
M  V30 BEGIN BOND
M  V30 1 1 1 2
M  V30 2 1 1 3
M  V30 3 2 2 4
M  V30 4 1 2 5
M  V30 5 1 4 6
M  V30 6 1 4 7
M  V30 7 2 5 8
M  V30 8 2 6 9
M  V30 9 1 7 10
M  V30 10 1 7 11
M  V30 11 1 9 12
M  V30 12 1 11 13
M  V30 13 1 11 14
M  V30 14 1 12 15
M  V30 15 1 8 9
M  V30 END BOND
M  V30 END CTAB
M  END
>  <ID>
CID6082

>  <name>
methoxamine

>  <smiles>
CC(C(c1c(ccc(c1)OC)OC)O)N

$$$$
CID5734
Actelion Java MolfileCreator 2.0

  0  0  0  0  0  0              0 V3000
M  V30 BEGIN CTAB
M  V30 COUNTS 14 15 0 0 0
M  V30 BEGIN ATOM
M  V30 1 S 1.732 -0.5 0.0 0
M  V30 2 O 1.232 -1.366 0.0 0
M  V30 3 O 2.232 0.366 0.0 0
M  V30 4 N 2.598 -0.9999 0.0 0
M  V30 5 C 0.866 0.0 0.0 0
M  V30 6 C 0.0 -0.5 0.0 0
M  V30 7 N -0.9135 -0.0932 0.0 0
M  V30 8 C -0.1045 -1.4945 0.0 0
M  V30 9 O -1.5826 -0.8364 0.0 0
M  V30 10 C -1.0826 -1.7024 0.0 0
M  V30 11 C 0.5646 -2.2376 0.0 0
M  V30 12 C -1.3916 -2.6534 0.0 0
M  V30 13 C 0.2555 -3.1887 0.0 0
M  V30 14 C -0.7225 -3.3966 0.0 0
M  V30 END ATOM
M  V30 BEGIN BOND
M  V30 1 2 1 2
M  V30 2 2 1 3
M  V30 3 1 1 4
M  V30 4 1 1 5
M  V30 5 1 5 6
M  V30 6 2 6 7
M  V30 7 1 6 8
M  V30 8 1 7 9
M  V30 9 2 8 10
M  V30 10 1 8 11
M  V30 11 1 10 12
M  V30 12 2 11 13
M  V30 13 2 12 14
M  V30 14 1 9 10
M  V30 15 1 13 14
M  V30 END BOND
M  V30 END CTAB
M  END
>  <ID>
CID5734

>  <name>
zonisamide

>  <smiles>
c1ccc2c(c1)c(no2)CS(=O)(=O)N

$$$$
CID448337
Actelion Java MolfileCreator 2.0

  0  0  0  0  0  0              0 V3000
M  V30 BEGIN CTAB
M  V30 COUNTS 11 11 0 0 0
M  V30 BEGIN ATOM
M  V30 1 O 5.1961 1.5 0.0 0
M  V30 2 C 4.3301 1.0 0.0 0
M  V30 3 C 3.4641 1.5 0.0 0
M  V30 4 C 4.3301 0.0 0.0 0
M  V30 5 C 2.598 0.9999 0.0 0
M  V30 6 C 3.4641 -0.4999 0.0 0
M  V30 7 C 2.598 0.0 0.0 0
M  V30 8 C 1.732 -0.5 0.0 0 CFG=2
M  V30 9 O 1.732 -1.5 0.0 0
M  V30 10 C 0.866 0.0 0.0 0
M  V30 11 N 0.0 -0.5 0.0 0
M  V30 END ATOM
M  V30 BEGIN BOND
M  V30 1 1 1 2
M  V30 2 2 2 3
M  V30 3 1 2 4
M  V30 4 1 3 5
M  V30 5 2 4 6
M  V30 6 2 5 7
M  V30 7 1 8 7
M  V30 8 1 8 9 CFG=3
M  V30 9 1 8 10
M  V30 10 1 10 11
M  V30 11 1 6 7
M  V30 END BOND
M  V30 BEGIN COLLECTION
M  V30 MDLV30/STEABS ATOMS=(1 8)
M  V30 END COLLECTION
M  V30 END CTAB
M  END
>  <ID>
CID448337

>  <name>
(+,-)-octopamine

>  <smiles>
c1cc(ccc1[C@@H](CN)O)O

$$$$
CID16231
Actelion Java MolfileCreator 2.0

  0  0  0  0  0  0              0 V3000
M  V30 BEGIN CTAB
M  V30 COUNTS 15 15 0 0 0
M  V30 BEGIN ATOM
M  V30 1 Cl 9.0932 0.0 0.0 0
M  V30 2 C 7.7942 -0.75 0.0 0
M  V30 3 N 6.4951 0.0 0.0 0
M  V30 4 C 7.7942 -2.2499 0.0 0
M  V30 5 C 5.1961 -0.75 0.0 0
M  V30 6 N 6.4951 -3.0 0.0 0
M  V30 7 N 9.0932 -2.9999 0.0 0
M  V30 8 C 5.1961 -2.2499 0.0 0
M  V30 9 C 3.8971 0.0 0.0 0
M  V30 10 N 3.8971 -2.9999 0.0 0
M  V30 11 O 3.8971 1.5 0.0 0
M  V30 12 N 2.598 -0.75 0.0 0
M  V30 13 C 1.299 0.0 0.0 0
M  V30 14 N 1.299 1.5 0.0 0
M  V30 15 N 0.0 -0.75 0.0 0
M  V30 END ATOM
M  V30 BEGIN BOND
M  V30 1 1 1 2
M  V30 2 2 2 3
M  V30 3 1 2 4
M  V30 4 1 3 5
M  V30 5 2 4 6
M  V30 6 1 4 7
M  V30 7 2 5 8
M  V30 8 1 5 9
M  V30 9 1 8 10
M  V30 10 2 9 11
M  V30 11 1 9 12
M  V30 12 2 12 13
M  V30 13 1 13 14
M  V30 14 1 13 15
M  V30 15 1 6 8
M  V30 END BOND
M  V30 END CTAB
M  END
>  <ID>
CID16231

>  <name>
amiloride

>  <smiles>
c1(c(nc(c(n1)Cl)N)N)C(=O)N=C(N)N

$$$$
CID5311054
Actelion Java MolfileCreator 2.0

  0  0  0  0  0  0              0 V3000
M  V30 BEGIN CTAB
M  V30 COUNTS 81 81 0 0 0
M  V30 BEGIN ATOM
M  V30 1 O 18.115 -2.8311 0.0 0
M  V30 2 C 18.0695 -1.8321 0.0 0
M  V30 3 N 17.0737 -1.7412 0.0 0
M  V30 4 C 19.053 -1.651 0.0 0 CFG=1
M  V30 5 C 16.1393 -1.385 0.0 0
M  V30 6 N 19.9511 -1.2113 0.0 0
M  V30 7 C 19.3663 -2.6007 0.0 0 CFG=2
M  V30 8 C 15.3356 -0.7898 0.0 0
M  V30 9 C 20.6973 -0.5455 0.0 0
M  V30 10 O 18.7006 -3.3468 0.0 0
M  V30 11 C 20.3454 -2.8041 0.0 0
M  V30 12 C 14.7224 0.0 0.0 0 CFG=2
M  V30 13 O 21.4584 -1.1941 0.0 0
M  V30 14 C 21.2362 0.2967 0.0 0 CFG=1
M  V30 15 N 13.8564 -0.5 0.0 0
M  V30 16 C 14.345 0.926 0.0 0
M  V30 17 N 21.5278 1.2533 0.0 0
M  V30 18 C 22.1441 -0.1223 0.0 0
M  V30 19 C 13.8564 -1.5 0.0 0
M  V30 20 O 13.3762 0.6782 0.0 0
M  V30 21 N 14.2314 1.9195 0.0 0
M  V30 22 C 21.5506 2.253 0.0 0
M  V30 23 C 22.9611 0.4542 0.0 0
M  V30 24 O 14.7224 -2.0 0.0 0
M  V30 25 C 12.9903 -1.9999 0.0 0 CFG=1
M  V30 26 C 14.3901 2.9069 0.0 0 CFG=2
M  V30 27 O 22.5441 2.3666 0.0 0
M  V30 28 C 21.3028 3.2218 0.0 0 CFG=1
M  V30 29 N 23.869 0.0351 0.0 0
M  V30 30 N 12.9903 -2.9999 0.0 0
M  V30 31 C 12.1243 -1.4999 0.0 0
M  V30 32 C 14.8092 3.8148 0.0 0
M  V30 33 C 13.4335 3.1985 0.0 0
M  V30 34 N 20.8028 4.0878 0.0 0
M  V30 35 C 22.2288 3.5992 0.0 0
M  V30 36 C 12.1243 -3.4999 0.0 0
M  V30 37 C 11.2583 -1.9999 0.0 0
M  V30 38 O 13.9669 4.3537 0.0 0
M  V30 39 N 15.4578 4.5759 0.0 0
M  V30 40 C 12.7027 2.5159 0.0 0
M  V30 41 C 20.0877 4.7868 0.0 0
M  V30 42 C 22.365 4.5899 0.0 0
M  V30 43 O 11.2583 -2.9999 0.0 0
M  V30 44 C 12.1243 -4.4999 0.0 0 CFG=1
M  V30 45 N 10.3923 -1.4999 0.0 0
M  V30 46 C 16.2877 5.1338 0.0 0 CFG=1
M  V30 47 N 11.7462 2.8076 0.0 0
M  V30 48 O 20.6828 5.5905 0.0 0
M  V30 49 C 19.2105 5.267 0.0 0 CFG=1
M  V30 50 N 23.2911 4.9673 0.0 0
M  V30 51 N 11.2583 -4.9999 0.0 0
M  V30 52 C 12.9903 -4.9999 0.0 0 CFG=2
M  V30 53 C 17.2373 5.4472 0.0 0
M  V30 54 C 15.848 6.032 0.0 0
M  V30 55 N 18.2363 5.4927 0.0 0
M  V30 56 C 19.5668 6.2014 0.0 0
M  V30 57 C 11.2583 -5.9999 0.0 0
M  V30 58 O 13.8564 -4.4999 0.0 0
M  V30 59 C 12.9903 -5.9999 0.0 0
M  V30 60 O 17.0562 6.4306 0.0 0
M  V30 61 C 14.8503 6.1002 0.0 0
M  V30 62 C 18.9357 6.9771 0.0 0
M  V30 63 O 12.1243 -6.4999 0.0 0
M  V30 64 C 10.3923 -6.4999 0.0 0 CFG=1
M  V30 65 C 14.2924 5.2703 0.0 0
M  V30 66 C 14.4106 6.9983 0.0 0
M  V30 67 C 17.9483 6.8184 0.0 0
M  V30 68 C 19.2919 7.9115 0.0 0
M  V30 69 N 10.3923 -7.4999 0.0 0
M  V30 70 C 9.5262 -5.9999 0.0 0
M  V30 71 C 9.5262 -7.9999 0.0 0
M  V30 72 C 8.6602 -6.4999 0.0 0
M  V30 73 O 8.6602 -7.4999 0.0 0
M  V30 74 C 9.5262 -8.9999 0.0 0
M  V30 75 N 7.7942 -5.9999 0.0 0
M  V30 76 C 8.6602 -9.4999 0.0 0
M  V30 77 C 8.6602 -10.4999 0.0 0
M  V30 78 C 7.7942 -10.9999 0.0 0
M  V30 79 C 7.7942 -11.9999 0.0 0
M  V30 80 C 6.9282 -10.4999 0.0 0
M  V30 81 C 6.9282 -12.4999 0.0 0
M  V30 END ATOM
M  V30 BEGIN BOND
M  V30 1 2 1 2
M  V30 2 1 2 3
M  V30 3 1 4 2
M  V30 4 1 3 5
M  V30 5 1 4 6 CFG=1
M  V30 6 1 7 4
M  V30 7 1 5 8
M  V30 8 1 6 9
M  V30 9 1 7 10 CFG=1
M  V30 10 1 7 11
M  V30 11 1 12 8
M  V30 12 2 9 13
M  V30 13 1 14 9
M  V30 14 1 12 15 CFG=3
M  V30 15 1 12 16
M  V30 16 1 14 17
M  V30 17 1 14 18 CFG=1
M  V30 18 1 15 19
M  V30 19 2 16 20
M  V30 20 1 16 21
M  V30 21 1 17 22
M  V30 22 1 18 23
M  V30 23 2 19 24
M  V30 24 1 25 19
M  V30 25 1 26 21
M  V30 26 2 22 27
M  V30 27 1 28 22
M  V30 28 1 23 29
M  V30 29 1 25 30 CFG=1
M  V30 30 1 25 31
M  V30 31 1 26 32
M  V30 32 1 26 33 CFG=1
M  V30 33 1 28 34
M  V30 34 1 28 35 CFG=1
M  V30 35 1 30 36
M  V30 36 1 31 37
M  V30 37 2 32 38
M  V30 38 1 32 39
M  V30 39 1 33 40
M  V30 40 1 34 41
M  V30 41 1 35 42
M  V30 42 2 36 43
M  V30 43 1 44 36
M  V30 44 1 37 45
M  V30 45 1 46 39
M  V30 46 1 40 47
M  V30 47 2 41 48
M  V30 48 1 49 41
M  V30 49 1 42 50
M  V30 50 1 44 51 CFG=3
M  V30 51 1 52 44
M  V30 52 1 46 53
M  V30 53 1 46 54 CFG=3
M  V30 54 1 49 55
M  V30 55 1 49 56 CFG=1
M  V30 56 1 51 57
M  V30 57 1 52 58 CFG=3
M  V30 58 1 52 59
M  V30 59 2 53 60
M  V30 60 1 54 61
M  V30 61 1 56 62
M  V30 62 2 57 63
M  V30 63 1 64 57
M  V30 64 1 61 65
M  V30 65 1 61 66
M  V30 66 1 62 67
M  V30 67 1 62 68
M  V30 68 1 64 69 CFG=1
M  V30 69 1 64 70
M  V30 70 1 69 71
M  V30 71 1 70 72
M  V30 72 2 71 73
M  V30 73 1 71 74
M  V30 74 1 72 75
M  V30 75 1 74 76
M  V30 76 1 76 77
M  V30 77 1 77 78
M  V30 78 1 78 79
M  V30 79 1 78 80
M  V30 80 1 79 81
M  V30 81 1 53 55
M  V30 END BOND
M  V30 BEGIN COLLECTION
M  V30 MDLV30/STEABS ATOMS=(12 4 7 12 14 25 26 28 44 46 49 52 64)
M  V30 END COLLECTION
M  V30 END CTAB
M  END
>  <ID>
CID5311054

>  <name>
colistin

>  <smiles>
CCC(C)CCCC(=O)N[C@@H](CCN)C(=O)N[C@@H]([C@@H](C)O)C(=O)N[C@@H](CCN)C(=O)N[C@H]1CCNC(=O)[C@@H](NC(=O)[C@@H](NC(=O)[C@@H](NC(=O)[C@@H](NC(=O)[C@H](NC(=O)[C@@H](NC1=O)CCN)CC(C)C)CC(C)C)CCN)CCN)[C@@H](C)O

$$$$
CID454216
Actelion Java MolfileCreator 2.0

  0  0  0  0  0  0              0 V3000
M  V30 BEGIN CTAB
M  V30 COUNTS 51 55 0 0 0
M  V30 BEGIN ATOM
M  V30 1 F 9.6602 -1.5 0.0 0
M  V30 2 C 8.6602 -1.5 0.0 0
M  V30 3 F 8.6602 -2.5 0.0 0
M  V30 4 F 7.6602 -1.5 0.0 0
M  V30 5 C 8.6602 -0.5 0.0 0
M  V30 6 O 7.7942 0.0 0.0 0
M  V30 7 N 9.5262 0.0 0.0 0
M  V30 8 C 9.5262 0.9999 0.0 0 CFG=2
M  V30 9 C 10.3923 1.4999 0.0 0 CFG=2
M  V30 10 C 8.6602 1.4999 0.0 0
M  V30 11 O 11.2583 0.9999 0.0 0
M  V30 12 C 10.3923 2.4999 0.0 0 CFG=1
M  V30 13 C 8.6602 2.4999 0.0 0 CFG=1
M  V30 14 O 9.5262 2.9999 0.0 0
M  V30 15 C 11.2583 2.9999 0.0 0
M  V30 16 O 7.7942 2.9999 0.0 0
M  V30 17 C 6.9282 2.4999 0.0 0 CFG=2
M  V30 18 C 6.0621 2.9999 0.0 0
M  V30 19 C 6.9282 1.4999 0.0 0
M  V30 20 C 6.0621 3.9999 0.0 0
M  V30 21 C 5.1961 2.5 0.0 0
M  V30 22 C 6.0621 0.9999 0.0 0 CFG=2
M  V30 23 O 6.9282 4.4999 0.0 0
M  V30 24 C 5.1961 4.5 0.0 0
M  V30 25 C 4.3301 3.0 0.0 0
M  V30 26 C 5.1961 1.5 0.0 0
M  V30 27 O 6.9282 0.4999 0.0 0
M  V30 28 C 6.0621 0.0 0.0 0
M  V30 29 C 5.1961 5.5 0.0 0
M  V30 30 C 4.3301 4.0 0.0 0
M  V30 31 O 3.4641 2.5 0.0 0
M  V30 32 O 6.9282 -0.5 0.0 0
M  V30 33 C 5.1961 -0.5 0.0 0
M  V30 34 O 6.0621 6.0 0.0 0
M  V30 35 C 4.3301 6.0 0.0 0
M  V30 36 C 3.4641 4.5 0.0 0
M  V30 37 O 4.3301 0.0 0.0 0
M  V30 38 C 4.3301 7.0 0.0 0
M  V30 39 C 3.4641 5.5 0.0 0
M  V30 40 O 2.598 4.0 0.0 0
M  V30 41 C 3.4641 -0.5 0.0 0
M  V30 42 O 5.1961 7.4999 0.0 0
M  V30 43 C 3.4641 7.5 0.0 0
M  V30 44 C 2.598 6.0 0.0 0
M  V30 45 O 3.4641 -1.5 0.0 0
M  V30 46 C 2.598 0.0 0.0 0
M  V30 47 C 5.1961 8.4999 0.0 0
M  V30 48 C 2.598 7.0 0.0 0
M  V30 49 C 1.732 -0.5 0.0 0
M  V30 50 C 0.866 0.0 0.0 0
M  V30 51 C 0.0 -0.5 0.0 0
M  V30 END ATOM
M  V30 BEGIN BOND
M  V30 1 1 1 2
M  V30 2 1 2 3
M  V30 3 1 2 4
M  V30 4 1 2 5
M  V30 5 2 5 6
M  V30 6 1 5 7
M  V30 7 1 8 7 CFG=1
M  V30 8 1 9 8
M  V30 9 1 8 10
M  V30 10 1 9 11 CFG=1
M  V30 11 1 12 9
M  V30 12 1 13 10
M  V30 13 1 12 14
M  V30 14 1 12 15 CFG=1
M  V30 15 1 13 16 CFG=3
M  V30 16 1 17 16 CFG=1
M  V30 17 1 17 18
M  V30 18 1 17 19
M  V30 19 2 18 20
M  V30 20 1 18 21
M  V30 21 1 22 19
M  V30 22 1 20 23
M  V30 23 1 20 24
M  V30 24 2 21 25
M  V30 25 1 21 26
M  V30 26 1 22 27 CFG=1
M  V30 27 1 22 28
M  V30 28 1 24 29
M  V30 29 2 24 30
M  V30 30 1 25 31
M  V30 31 2 28 32
M  V30 32 1 28 33
M  V30 33 2 29 34
M  V30 34 1 29 35
M  V30 35 1 30 36
M  V30 36 1 33 37
M  V30 37 2 35 38
M  V30 38 1 35 39
M  V30 39 2 36 40
M  V30 40 1 37 41
M  V30 41 1 38 42
M  V30 42 1 38 43
M  V30 43 2 39 44
M  V30 44 2 41 45
M  V30 45 1 41 46
M  V30 46 1 42 47
M  V30 47 2 43 48
M  V30 48 1 46 49
M  V30 49 1 49 50
M  V30 50 1 50 51
M  V30 51 1 13 14
M  V30 52 1 22 26
M  V30 53 1 25 30
M  V30 54 1 36 39
M  V30 55 1 44 48
M  V30 END BOND
M  V30 BEGIN COLLECTION
M  V30 MDLV30/STEABS ATOMS=(6 8 9 12 13 17 22)
M  V30 END COLLECTION
M  V30 END CTAB
M  END
>  <ID>
CID454216

>  <name>
valrubicin

>  <smiles>
CCCCC(=O)OCC(=O)[C@]1(C[C@@H](c2c(C1)c(c3c(c2O)C(=O)c4c(C3=O)cccc4OC)O)O[C@H]5C[C@@H]([C@@H]([C@@H](O5)C)O)NC(=O)C(F)(F)F)O

$$$$
CID6918173
Actelion Java MolfileCreator 2.0

  0  0  0  0  0  0              0 V3000
M  V30 BEGIN CTAB
M  V30 COUNTS 92 98 0 0 0
M  V30 BEGIN ATOM
M  V30 1 S 7.0721 13.3237 0.0 0
M  V30 2 C 6.3221 12.0247 0.0 0
M  V30 3 C 8.5393 13.0118 0.0 0
M  V30 4 C 7.3258 10.91 0.0 0
M  V30 5 C 4.8303 11.8679 0.0 0
M  V30 6 C 8.6961 11.5201 0.0 0
M  V30 7 C 4.2202 10.4976 0.0 0 CFG=2
M  V30 8 N 5.1019 9.284 0.0 0
M  V30 9 C 2.7284 10.3408 0.0 0
M  V30 10 C 4.4918 7.9137 0.0 0
M  V30 11 O 2.1183 8.9705 0.0 0
M  V30 12 N 1.8467 11.5543 0.0 0
M  V30 13 O 3.0 7.7569 0.0 0
M  V30 14 C 5.3734 6.7002 0.0 0
M  V30 15 C 0.355 11.3975 0.0 0 CFG=2
M  V30 16 N 4.7633 5.3299 0.0 0
M  V30 17 C -0.5266 12.611 0.0 0
M  V30 18 C -0.2551 10.0272 0.0 0
M  V30 19 C 5.645 4.1164 0.0 0
M  V30 20 O -2.0184 12.4542 0.0 0
M  V30 21 N 0.0834 13.9813 0.0 0
M  V30 22 O 0.6265 8.8137 0.0 0
M  V30 23 O 7.1368 4.2731 0.0 0
M  V30 24 C 5.0349 2.746 0.0 0 CFG=1
M  V30 25 C -0.7982 15.1949 0.0 0 CFG=1
M  V30 26 C 1.5752 14.1381 0.0 0
M  V30 27 N 5.7849 1.447 0.0 0
M  V30 28 C 3.5677 2.4342 0.0 0
M  V30 29 C -2.29 15.0381 0.0 0
M  V30 30 C -0.1881 16.5652 0.0 0
M  V30 31 C 2.1853 15.5085 0.0 0
M  V30 32 C 7.2767 1.2902 0.0 0
M  V30 33 C 4.7812 0.3323 0.0 0
M  V30 34 C 3.4109 0.9424 0.0 0 CFG=2
M  V30 35 O -2.9001 13.6678 0.0 0
M  V30 36 N -3.1717 16.2516 0.0 0
M  V30 37 C 1.3036 16.722 0.0 0
M  V30 38 C 3.6771 15.6653 0.0 0
M  V30 39 O 8.1584 2.5037 0.0 0
M  V30 40 C 7.8868 -0.08 0.0 0 CFG=1
M  V30 41 O 2.1119 0.1924 0.0 0
M  V30 42 C -2.7081 17.6782 0.0 0 CFG=2
M  V30 43 C -4.6717 16.2516 0.0 0 CFG=2
M  V30 44 C 1.9137 18.0923 0.0 0
M  V30 45 C 4.2872 17.0356 0.0 0
M  V30 46 N 9.354 -0.3919 0.0 0
M  V30 47 C 7.1368 -1.3791 0.0 0
M  V30 48 C -3.9217 18.5599 0.0 0 CFG=2
M  V30 49 C -1.3378 18.2883 0.0 0
M  V30 50 C -5.5533 15.0381 0.0 0
M  V30 51 C -5.1352 17.6782 0.0 0
M  V30 52 C 3.4055 18.2491 0.0 0
M  V30 53 C 10.4687 0.6117 0.0 0
M  V30 54 C 9.5108 -1.8837 0.0 0
M  V30 55 C 8.1405 -2.4938 0.0 0
M  V30 56 C -3.7649 20.0517 0.0 0
M  V30 57 C -1.181 19.7801 0.0 0
M  V30 58 O -4.9432 13.6678 0.0 0
M  V30 59 N -7.0451 15.1949 0.0 0
M  V30 60 O 10.1569 2.0789 0.0 0
M  V30 61 C 11.8953 0.1482 0.0 0 CFG=1
M  V30 62 C -2.3945 20.6618 0.0 0
M  V30 63 C -7.9268 13.9813 0.0 0 CFG=2
M  V30 64 N 13.01 1.1519 0.0 0
M  V30 65 C 12.2072 -1.3189 0.0 0
M  V30 66 C -7.3167 12.611 0.0 0
M  V30 67 C -9.4186 14.1381 0.0 0
M  V30 68 C 12.6982 2.6191 0.0 0
M  V30 69 C 11.0925 -2.3226 0.0 0
M  V30 70 O -8.1984 11.3975 0.0 0
M  V30 71 O -5.8249 12.4542 0.0 0
M  V30 72 C -10.3003 12.9246 0.0 0
M  V30 73 O 11.2716 3.0826 0.0 0
M  V30 74 C 13.8129 3.6228 0.0 0 CFG=2
M  V30 75 C 11.4043 -3.7899 0.0 0
M  V30 76 C -11.792 13.0814 0.0 0
M  V30 77 N 15.2395 3.1593 0.0 0
M  V30 78 C 13.501 5.09 0.0 0
M  V30 79 N 10.2896 -4.7935 0.0 0
M  V30 80 N -12.6737 11.8679 0.0 0
M  V30 81 C 14.6157 6.0937 0.0 0
M  V30 82 C 10.6015 -6.2608 0.0 0
M  V30 83 C -14.1655 12.0247 0.0 0
M  V30 84 C 14.3039 7.5609 0.0 0
M  V30 85 N 9.4868 -7.2645 0.0 0
M  V30 86 N 12.0281 -6.7243 0.0 0
M  V30 87 N -14.7756 13.395 0.0 0
M  V30 88 N -15.0472 10.8112 0.0 0
M  V30 89 N 15.4186 8.5646 0.0 0
M  V30 90 C 15.1067 10.0319 0.0 0
M  V30 91 N 13.6801 10.4954 0.0 0
M  V30 92 N 16.2214 11.0356 0.0 0
M  V30 END ATOM
M  V30 BEGIN BOND
M  V30 1 1 1 2
M  V30 2 1 1 3
M  V30 3 2 2 4
M  V30 4 1 2 5
M  V30 5 2 3 6
M  V30 6 1 7 5
M  V30 7 1 7 8 CFG=3
M  V30 8 1 7 9
M  V30 9 1 8 10
M  V30 10 2 9 11
M  V30 11 1 9 12
M  V30 12 2 10 13
M  V30 13 1 10 14
M  V30 14 1 15 12 CFG=1
M  V30 15 1 14 16
M  V30 16 1 15 17
M  V30 17 1 15 18
M  V30 18 1 16 19
M  V30 19 2 17 20
M  V30 20 1 17 21
M  V30 21 1 18 22
M  V30 22 2 19 23
M  V30 23 1 24 19 CFG=1
M  V30 24 1 25 21
M  V30 25 1 21 26
M  V30 26 1 24 27
M  V30 27 1 24 28
M  V30 28 1 25 29 CFG=1
M  V30 29 1 25 30
M  V30 30 1 26 31
M  V30 31 1 27 32
M  V30 32 1 27 33
M  V30 33 1 34 28
M  V30 34 2 29 35
M  V30 35 1 29 36
M  V30 36 1 30 37
M  V30 37 1 31 38
M  V30 38 2 32 39
M  V30 39 1 40 32 CFG=1
M  V30 40 1 34 41 CFG=3
M  V30 41 1 42 36 CFG=3
M  V30 42 1 43 36
M  V30 43 1 37 44
M  V30 44 2 38 45
M  V30 45 1 40 46
M  V30 46 1 40 47
M  V30 47 1 48 42
M  V30 48 1 42 49
M  V30 49 1 43 50 CFG=3
M  V30 50 1 43 51
M  V30 51 2 44 52
M  V30 52 1 46 53
M  V30 53 1 46 54
M  V30 54 1 47 55
M  V30 55 1 48 56 CFG=3
M  V30 56 1 49 57
M  V30 57 2 50 58
M  V30 58 1 50 59
M  V30 59 2 53 60
M  V30 60 1 61 53
M  V30 61 1 56 62
M  V30 62 1 63 59 CFG=3
M  V30 63 1 61 64 CFG=1
M  V30 64 1 61 65
M  V30 65 1 63 66
M  V30 66 1 63 67
M  V30 67 1 64 68
M  V30 68 1 65 69
M  V30 69 2 66 70
M  V30 70 1 66 71
M  V30 71 1 67 72
M  V30 72 2 68 73
M  V30 73 1 74 68
M  V30 74 1 69 75
M  V30 75 1 72 76
M  V30 76 1 74 77 CFG=1
M  V30 77 1 74 78
M  V30 78 1 75 79
M  V30 79 1 76 80
M  V30 80 1 78 81
M  V30 81 2 79 82
M  V30 82 2 80 83
M  V30 83 1 81 84
M  V30 84 1 82 85
M  V30 85 1 82 86
M  V30 86 1 83 87
M  V30 87 1 83 88
M  V30 88 1 84 89
M  V30 89 2 89 90
M  V30 90 1 90 91
M  V30 91 1 90 92
M  V30 92 1 4 6
M  V30 93 2 31 37
M  V30 94 1 33 34
M  V30 95 1 45 52
M  V30 96 1 48 51
M  V30 97 1 54 55
M  V30 98 1 57 62
M  V30 END BOND
M  V30 BEGIN COLLECTION
M  V30 MDLV30/STEABS ATOMS=(12 7 15 24 25 34 40 42 43 48 61 63 74)
M  V30 END COLLECTION
M  V30 END CTAB
M  END
>  <ID>
CID6918173

>  <name>
icatibant

>  <smiles>
C1CC[C@H]2[C@@H](C1)C[C@H](N2C(=O)[C@H]3Cc4ccccc4CN3C(=O)[C@H](CO)NC(=O)[C@H](Cc5cccs5)NC(=O)CNC(=O)[C@@H]6C[C@H](CN6C(=O)[C@@H]7CCCN7C(=O)[C@H](CCCN=C(N)N)NC(=O)[C@@H](CCCN=C(N)N)N)O)C(=O)N[C@@H](CCCN=C(N)N)C(=O)O

$$$$
CID164522
Actelion Java MolfileCreator 2.0

  0  0  0  0  0  0              0 V3000
M  V30 BEGIN CTAB
M  V30 COUNTS 27 29 0 0 0
M  V30 BEGIN ATOM
M  V30 1 Cl 11.2583 2.9999 0.0 0
M  V30 2 C 10.3923 2.4999 0.0 0
M  V30 3 C 9.5262 2.9999 0.0 0
M  V30 4 C 10.3923 1.4999 0.0 0
M  V30 5 C 8.6602 2.4999 0.0 0
M  V30 6 C 9.5262 0.9999 0.0 0
M  V30 7 C 8.6602 1.4999 0.0 0
M  V30 8 C 7.7942 0.9999 0.0 0 CFG=2
M  V30 9 O 6.9282 1.4999 0.0 0
M  V30 10 C 7.7942 0.0 0.0 0
M  V30 11 C 6.0621 0.9999 0.0 0
M  V30 12 N 6.9282 -0.5 0.0 0
M  V30 13 C 8.6602 -0.5 0.0 0
M  V30 14 C 5.1961 1.4999 0.0 0
M  V30 15 C 6.0621 0.0 0.0 0
M  V30 16 C 6.9282 -1.5 0.0 0
M  V30 17 C 8.6602 -1.5 0.0 0
M  V30 18 C 4.3301 0.9999 0.0 0
M  V30 19 C 5.1961 -0.5 0.0 0
M  V30 20 C 7.7942 -2.0 0.0 0
M  V30 21 N 4.3301 0.0 0.0 0
M  V30 22 C 3.4641 -0.5 0.0 0
M  V30 23 C 2.598 0.0 0.0 0
M  V30 24 C 1.732 -0.5 0.0 0
M  V30 25 C 0.866 0.0 0.0 0
M  V30 26 O 0.866 1.0 0.0 0
M  V30 27 O 0.0 -0.5 0.0 0
M  V30 END ATOM
M  V30 BEGIN BOND
M  V30 1 1 1 2
M  V30 2 2 2 3
M  V30 3 1 2 4
M  V30 4 1 3 5
M  V30 5 2 4 6
M  V30 6 2 5 7
M  V30 7 1 8 7
M  V30 8 1 8 9 CFG=1
M  V30 9 1 8 10
M  V30 10 1 9 11
M  V30 11 2 10 12
M  V30 12 1 10 13
M  V30 13 1 11 14
M  V30 14 1 11 15
M  V30 15 1 12 16
M  V30 16 2 13 17
M  V30 17 1 14 18
M  V30 18 1 15 19
M  V30 19 2 16 20
M  V30 20 1 18 21
M  V30 21 1 21 22
M  V30 22 1 22 23
M  V30 23 1 23 24
M  V30 24 1 24 25
M  V30 25 2 25 26
M  V30 26 1 25 27
M  V30 27 1 6 7
M  V30 28 1 17 20
M  V30 29 1 19 21
M  V30 END BOND
M  V30 BEGIN COLLECTION
M  V30 MDLV30/STEABS ATOMS=(1 8)
M  V30 END COLLECTION
M  V30 END CTAB
M  END
>  <ID>
CID164522

>  <name>
bepotastine

>  <smiles>
C1CN(CCC1O[C@@H](c2ccc(cc2)Cl)c3ccccn3)CCCC(=O)O

$$$$
CID41867
Actelion Java MolfileCreator 2.0

  0  0  0  0  0  0              0 V3000
M  V30 BEGIN CTAB
M  V30 COUNTS 39 43 0 0 0
M  V30 BEGIN ATOM
M  V30 1 O 2.598 -9.75 0.0 0
M  V30 2 C 1.299 -9.0 0.0 0
M  V30 3 C 1.299 -7.5 0.0 0
M  V30 4 C 0.0 -9.75 0.0 0
M  V30 5 C 2.598 -6.75 0.0 0
M  V30 6 C 0.0 -6.75 0.0 0
M  V30 7 C 0.0 -11.25 0.0 0
M  V30 8 C -1.299 -9.0 0.0 0
M  V30 9 O 3.8971 -7.5 0.0 0
M  V30 10 C 2.598 -5.2499 0.0 0
M  V30 11 C -1.299 -7.5 0.0 0
M  V30 12 C 0.0 -5.2499 0.0 0
M  V30 13 O 1.299 -12.0 0.0 0
M  V30 14 C -1.299 -11.9999 0.0 0
M  V30 15 C -2.598 -9.7499 0.0 0
M  V30 16 C 1.299 -4.5 0.0 0
M  V30 17 C 3.8971 -4.5 0.0 0 CFG=1
M  V30 18 O -2.598 -6.75 0.0 0
M  V30 19 O -1.299 -4.4999 0.0 0
M  V30 20 C 2.598 -11.25 0.0 0
M  V30 21 C -2.598 -11.25 0.0 0
M  V30 22 C 1.299 -2.9999 0.0 0
M  V30 23 O 5.1961 -5.25 0.0 0
M  V30 24 C 3.8971 -2.9999 0.0 0
M  V30 25 C 2.598 -2.25 0.0 0 CFG=1
M  V30 26 C 6.4951 -4.4999 0.0 0 CFG=2
M  V30 27 O 3.8971 -1.5 0.0 0
M  V30 28 C 2.598 -0.75 0.0 0
M  V30 29 O 7.7942 -5.2499 0.0 0
M  V30 30 C 6.4951 -2.9999 0.0 0
M  V30 31 O 3.8971 0.0 0.0 0
M  V30 32 C 1.299 0.0 0.0 0
M  V30 33 C 9.0932 -4.5 0.0 0 CFG=2
M  V30 34 C 7.7942 -2.25 0.0 0 CFG=1
M  V30 35 O 0.0 -0.75 0.0 0
M  V30 36 C 9.0932 -2.9999 0.0 0 CFG=1
M  V30 37 C 10.3923 -5.25 0.0 0
M  V30 38 N 7.7942 -0.75 0.0 0
M  V30 39 O 10.3923 -2.2499 0.0 0
M  V30 END ATOM
M  V30 BEGIN BOND
M  V30 1 2 1 2
M  V30 2 1 2 3
M  V30 3 1 2 4
M  V30 4 2 3 5
M  V30 5 1 3 6
M  V30 6 2 4 7
M  V30 7 1 4 8
M  V30 8 1 5 9
M  V30 9 1 5 10
M  V30 10 1 6 11
M  V30 11 2 6 12
M  V30 12 1 7 13
M  V30 13 1 7 14
M  V30 14 2 8 15
M  V30 15 2 10 16
M  V30 16 1 17 10
M  V30 17 2 11 18
M  V30 18 1 12 19
M  V30 19 1 13 20
M  V30 20 2 14 21
M  V30 21 1 16 22
M  V30 22 1 17 23 CFG=3
M  V30 23 1 17 24
M  V30 24 1 25 22
M  V30 25 1 26 23 CFG=1
M  V30 26 1 25 27 CFG=3
M  V30 27 1 25 28
M  V30 28 1 26 29
M  V30 29 1 26 30
M  V30 30 2 28 31
M  V30 31 1 28 32
M  V30 32 1 33 29
M  V30 33 1 34 30
M  V30 34 1 32 35
M  V30 35 1 36 33
M  V30 36 1 33 37 CFG=3
M  V30 37 1 34 38 CFG=3
M  V30 38 1 36 39 CFG=1
M  V30 39 1 8 11
M  V30 40 1 12 16
M  V30 41 1 15 21
M  V30 42 1 24 25
M  V30 43 1 34 36
M  V30 END BOND
M  V30 BEGIN COLLECTION
M  V30 MDLV30/STEABS ATOMS=(6 17 25 26 33 34 36)
M  V30 END COLLECTION
M  V30 END CTAB
M  END
>  <ID>
CID41867

>  <name>
epirubicin

>  <smiles>
C[C@H]1[C@@H]([C@H](C[C@@H](O1)O[C@H]2C[C@@](Cc3c2c(c4c(c3O)C(=O)c5c(C4=O)c(ccc5)OC)O)(C(=O)CO)O)N)O

$$$$
CID21158562
Actelion Java MolfileCreator 2.0

  0  0  0  0  0  0              0 V3000
M  V30 BEGIN CTAB
M  V30 COUNTS 25 26 0 0 0
M  V30 BEGIN ATOM
M  V30 1 O 8.8075 -8.0455 0.0 0
M  V30 2 C 8.0644 -7.3763 0.0 0
M  V30 3 O 7.1133 -7.6854 0.0 0
M  V30 4 C 8.2723 -6.3982 0.0 0
M  V30 5 C 7.5291 -5.7291 0.0 0
M  V30 6 C 7.737 -4.7509 0.0 0
M  V30 7 C 6.9939 -4.0818 0.0 0
M  V30 8 C 7.2018 -3.1036 0.0 0
M  V30 9 O 8.1154 -2.6969 0.0 0
M  V30 10 C 6.5327 -2.3605 0.0 0
M  V30 11 C 8.0108 -1.7024 0.0 0 CFG=2
M  V30 12 C 7.0327 -1.4945 0.0 0 CFG=1
M  V30 13 C 8.5108 -0.8364 0.0 0
M  V30 14 C 6.9282 -0.5 0.0 0 CFG=2
M  V30 15 C 7.8417 -0.0932 0.0 0 CFG=2
M  V30 16 C 6.0621 0.0 0.0 0
M  V30 17 O 8.0496 0.8848 0.0 0
M  V30 18 C 5.1961 -0.5 0.0 0
M  V30 19 C 4.3301 0.0 0.0 0 CFG=1
M  V30 20 O 4.3301 1.0 0.0 0
M  V30 21 C 3.4641 -0.5 0.0 0
M  V30 22 C 2.598 0.0 0.0 0
M  V30 23 C 1.732 -0.5 0.0 0
M  V30 24 C 0.866 0.0 0.0 0
M  V30 25 C 0.0 -0.5 0.0 0
M  V30 END ATOM
M  V30 BEGIN BOND
M  V30 1 2 1 2
M  V30 2 1 2 3
M  V30 3 1 2 4
M  V30 4 1 4 5
M  V30 5 1 5 6
M  V30 6 1 6 7
M  V30 7 2 7 8
M  V30 8 1 8 9
M  V30 9 1 8 10
M  V30 10 1 11 9 CFG=3
M  V30 11 1 12 10 CFG=3
M  V30 12 1 11 13
M  V30 13 1 14 12
M  V30 14 1 15 13
M  V30 15 1 14 16 CFG=1
M  V30 16 1 15 17 CFG=3
M  V30 17 2 16 18
M  V30 18 1 19 18
M  V30 19 1 19 20 CFG=3
M  V30 20 1 19 21
M  V30 21 1 21 22
M  V30 22 1 22 23
M  V30 23 1 23 24
M  V30 24 1 24 25
M  V30 25 1 11 12
M  V30 26 1 14 15
M  V30 END BOND
M  V30 BEGIN COLLECTION
M  V30 MDLV30/STEABS ATOMS=(5 11 12 14 15 19)
M  V30 END COLLECTION
M  V30 END CTAB
M  END
>  <ID>
CID21158562

>  <name>
epoprostenol

>  <smiles>
CCCCC[C@@H](/C=C/[C@H]1[C@@H](C[C@H]2[C@@H]1C/C(=C/CCCC(=O)O)/O2)O)O

$$$$
CID71306
Actelion Java MolfileCreator 2.0

  0  0  0  0  0  0              0 V3000
M  V30 BEGIN CTAB
M  V30 COUNTS 80 86 0 0 0
M  V30 BEGIN ATOM
M  V30 1 S 7.8158 2.2562 0.0 0
M  V30 2 S 9.0932 1.5187 0.0 0
M  V30 3 C 6.5132 1.5041 0.0 0
M  V30 4 C 10.4973 2.3388 0.0 0
M  V30 5 C 6.5132 0.0 0.0 0
M  V30 6 C 12.0043 1.4486 0.0 0
M  V30 7 N 5.2105 -0.752 0.0 0
M  V30 8 C 7.8158 -0.752 0.0 0
M  V30 9 N 12.9243 2.2947 0.0 0
M  V30 10 C 11.999 0.2496 0.0 0
M  V30 11 C 3.9079 0.0 0.0 0
M  V30 12 O 9.0525 -0.0865 0.0 0
M  V30 13 N 7.8158 -2.2562 0.0 0
M  V30 14 C 14.4104 1.6836 0.0 0
M  V30 15 O 10.3916 -0.8807 0.0 0
M  V30 16 N 13.3995 -0.7054 0.0 0
M  V30 17 O 3.9079 1.5041 0.0 0
M  V30 18 C 2.6052 -0.752 0.0 0
M  V30 19 C 9.1185 -3.0083 0.0 0
M  V30 20 O 14.0603 0.2399 0.0 0
M  V30 21 C 15.6317 2.2562 0.0 0
M  V30 22 C 13.0474 -2.1291 0.0 0
M  V30 23 N 2.6052 -2.2562 0.0 0
M  V30 24 C 1.3026 0.0 0.0 0
M  V30 25 C 10.2775 -2.5658 0.0 0
M  V30 26 C 9.1185 -4.5124 0.0 0
M  V30 27 N 16.9343 1.5041 0.0 0
M  V30 28 C 15.6317 3.7604 0.0 0
M  V30 29 C 11.7371 -2.7901 0.0 0
M  V30 30 C 14.0149 -3.0709 0.0 0
M  V30 31 C 0.0 -0.752 0.0 0
M  V30 32 O 10.4457 -0.839 0.0 0
M  V30 33 N 11.9694 -3.226 0.0 0
M  V30 34 C 7.8158 -5.2645 0.0 0
M  V30 35 C 16.9343 0.0 0.0 0
M  V30 36 C 16.9343 4.5124 0.0 0
M  V30 37 C 14.329 4.5124 0.0 0
M  V30 38 O 11.7237 -4.5124 0.0 0
M  V30 39 N 10.1632 -2.0599 0.0 0
M  V30 40 C 14.107 -4.6053 0.0 0
M  V30 41 C -1.3026 0.0 0.0 0
M  V30 42 C 0.0 -2.2562 0.0 0
M  V30 43 C 12.9829 -2.5323 0.0 0
M  V30 44 C 7.8158 -6.7687 0.0 0
M  V30 45 C 6.5132 -4.5124 0.0 0
M  V30 46 O 18.237 -0.752 0.0 0
M  V30 47 C 15.6317 -0.752 0.0 0
M  V30 48 C 15.5459 -5.3966 0.0 0
M  V30 49 C 13.1121 -5.3966 0.0 0
M  V30 50 C -2.6052 -0.752 0.0 0
M  V30 51 C -1.3026 -3.0083 0.0 0
M  V30 52 C 14.5408 -2.9661 0.0 0
M  V30 53 C 12.8744 -0.8587 0.0 0
M  V30 54 C 6.5132 -7.5208 0.0 0
M  V30 55 C 5.2105 -5.2645 0.0 0
M  V30 56 N 15.6317 -2.2562 0.0 0
M  V30 57 C 14.4752 -0.1304 0.0 0
M  V30 58 C 15.0811 -6.8271 0.0 0
M  V30 59 C 17.0172 -5.0838 0.0 0
M  V30 60 N 13.577 -6.8271 0.0 0
M  V30 61 C -2.6052 -2.2562 0.0 0
M  V30 62 O 14.5789 -4.4079 0.0 0
M  V30 63 C 11.6975 -0.1814 0.0 0
M  V30 64 C 5.2105 -6.7687 0.0 0
M  V30 65 C 14.2862 1.1356 0.0 0
M  V30 66 C 16.0876 -7.9449 0.0 0
M  V30 67 C 18.0237 -6.2016 0.0 0
M  V30 68 C 11.4149 1.4252 0.0 0
M  V30 69 C 10.2309 -0.3901 0.0 0
M  V30 70 O 3.9079 -7.5208 0.0 0
M  V30 71 C 13.1404 2.0853 0.0 0
M  V30 72 C 17.5589 -7.6322 0.0 0
M  V30 73 C 10.1448 1.684 0.0 0
M  V30 74 C 12.4953 2.6604 0.0 0
M  V30 75 N 9.3634 0.5473 0.0 0
M  V30 76 C 13.0264 3.7604 0.0 0
M  V30 77 C 9.6304 3.2392 0.0 0
M  V30 78 C 11.9754 3.8452 0.0 0
M  V30 79 N 11.72 4.6322 0.0 0
M  V30 80 C 10.6369 4.357 0.0 0
M  V30 END ATOM
M  V30 BEGIN BOND
M  V30 1 1 1 2
M  V30 2 1 1 3
M  V30 3 1 2 4
M  V30 4 1 3 5
M  V30 5 1 4 6
M  V30 6 1 5 7
M  V30 7 1 5 8
M  V30 8 1 6 9
M  V30 9 1 6 10
M  V30 10 1 7 11
M  V30 11 2 8 12
M  V30 12 1 8 13
M  V30 13 1 9 14
M  V30 14 2 10 15
M  V30 15 1 10 16
M  V30 16 2 11 17
M  V30 17 1 11 18
M  V30 18 1 13 19
M  V30 19 2 14 20
M  V30 20 1 14 21
M  V30 21 1 16 22
M  V30 22 1 18 23
M  V30 23 1 18 24
M  V30 24 1 19 25
M  V30 25 1 19 26
M  V30 26 1 21 27
M  V30 27 1 21 28
M  V30 28 1 22 29
M  V30 29 1 22 30
M  V30 30 1 24 31
M  V30 31 2 25 32
M  V30 32 1 25 33
M  V30 33 1 26 34
M  V30 34 1 27 35
M  V30 35 1 28 36
M  V30 36 1 28 37
M  V30 37 2 29 38
M  V30 38 1 29 39
M  V30 39 1 30 40
M  V30 40 2 31 41
M  V30 41 1 31 42
M  V30 42 1 33 43
M  V30 43 2 34 44
M  V30 44 1 34 45
M  V30 45 2 35 46
M  V30 46 1 35 47
M  V30 47 1 40 48
M  V30 48 2 40 49
M  V30 49 1 41 50
M  V30 50 2 42 51
M  V30 51 1 43 52
M  V30 52 1 43 53
M  V30 53 1 44 54
M  V30 54 2 45 55
M  V30 55 1 47 56
M  V30 56 1 47 57
M  V30 57 2 48 58
M  V30 58 1 48 59
M  V30 59 1 49 60
M  V30 60 2 50 61
M  V30 61 2 52 62
M  V30 62 1 53 63
M  V30 63 2 54 64
M  V30 64 1 57 65
M  V30 65 1 58 66
M  V30 66 2 59 67
M  V30 67 1 63 68
M  V30 68 2 63 69
M  V30 69 1 64 70
M  V30 70 1 65 71
M  V30 71 2 66 72
M  V30 72 2 68 73
M  V30 73 1 68 74
M  V30 74 1 69 75
M  V30 75 1 71 76
M  V30 76 1 73 77
M  V30 77 2 74 78
M  V30 78 1 76 79
M  V30 79 2 77 80
M  V30 80 1 51 61
M  V30 81 1 52 56
M  V30 82 1 55 64
M  V30 83 1 58 60
M  V30 84 1 67 72
M  V30 85 1 73 75
M  V30 86 1 78 80
M  V30 END BOND
M  V30 END CTAB
M  END
>  <ID>
CID71306

>  <name>
vapreotide

>  <smiles>
CC(C)C1C(=O)NC(CSSCC(C(=O)NC(C(=O)NC(C(=O)NC(C(=O)N1)CCCCN)Cc2c[nH]c3ccccc23)Cc4ccc(cc4)O)NC(=O)C(Cc5ccccc5)N)C(=O)NC(Cc6c[nH]c7ccccc67)C(=O)N

$$$$
CID135413536
Actelion Java MolfileCreator 2.0

  0  0  0  0  0  0              0 V3000
M  V30 BEGIN CTAB
M  V30 COUNTS 37 40 0 0 0
M  V30 BEGIN ATOM
M  V30 1 F 3.4641 -4.4999 0.0 0
M  V30 2 C 3.4641 -3.5 0.0 0
M  V30 3 C 4.3301 -3.0 0.0 0
M  V30 4 C 2.598 -2.9999 0.0 0
M  V30 5 C 4.3301 -2.0 0.0 0
M  V30 6 C 2.598 -1.9999 0.0 0
M  V30 7 C 3.4641 -1.5 0.0 0
M  V30 8 C 3.4641 -0.4999 0.0 0 CFG=2
M  V30 9 N 4.3301 0.0 0.0 0
M  V30 10 C 2.598 0.0 0.0 0 CFG=2
M  V30 11 C 4.3301 1.0 0.0 0
M  V30 12 C 5.1961 -0.5 0.0 0
M  V30 13 O 2.598 1.0 0.0 0
M  V30 14 O 1.732 -0.5 0.0 0
M  V30 15 C 3.4641 1.5 0.0 0
M  V30 16 C 6.0621 0.0 0.0 0
M  V30 17 C 0.866 0.0 0.0 0 CFG=1
M  V30 18 N 6.9757 -0.4067 0.0 0
M  V30 19 N 6.1667 0.9945 0.0 0
M  V30 20 C 0.0 -0.4999 0.0 0
M  V30 21 C 0.866 1.0 0.0 0
M  V30 22 N 7.6448 0.3364 0.0 0
M  V30 23 C 7.1448 1.2024 0.0 0
M  V30 24 C 0.0 -1.4999 0.0 0
M  V30 25 C -0.866 0.0 0.0 0
M  V30 26 O 7.5515 2.1159 0.0 0
M  V30 27 C -0.866 -1.9999 0.0 0
M  V30 28 C -1.732 -0.4999 0.0 0
M  V30 29 C -1.732 -1.4999 0.0 0
M  V30 30 C -0.866 -3.0 0.0 0
M  V30 31 C -2.598 0.0 0.0 0
M  V30 32 F -1.866 -2.9999 0.0 0
M  V30 33 F -0.866 -4.0 0.0 0
M  V30 34 F 0.1339 -3.0 0.0 0
M  V30 35 F -2.098 0.866 0.0 0
M  V30 36 F -3.4641 0.5 0.0 0
M  V30 37 F -3.098 -0.866 0.0 0
M  V30 END ATOM
M  V30 BEGIN BOND
M  V30 1 1 1 2
M  V30 2 2 2 3
M  V30 3 1 2 4
M  V30 4 1 3 5
M  V30 5 2 4 6
M  V30 6 2 5 7
M  V30 7 1 8 7 CFG=1
M  V30 8 1 8 9
M  V30 9 1 10 8
M  V30 10 1 9 11
M  V30 11 1 9 12
M  V30 12 1 10 13
M  V30 13 1 10 14 CFG=1
M  V30 14 1 11 15
M  V30 15 1 12 16
M  V30 16 1 17 14 CFG=1
M  V30 17 2 16 18
M  V30 18 1 16 19
M  V30 19 1 17 20
M  V30 20 1 17 21
M  V30 21 1 18 22
M  V30 22 1 19 23
M  V30 23 2 20 24
M  V30 24 1 20 25
M  V30 25 2 23 26
M  V30 26 1 24 27
M  V30 27 2 25 28
M  V30 28 2 27 29
M  V30 29 1 27 30
M  V30 30 1 28 31
M  V30 31 1 30 32
M  V30 32 1 30 33
M  V30 33 1 30 34
M  V30 34 1 31 35
M  V30 35 1 31 36
M  V30 36 1 31 37
M  V30 37 1 6 7
M  V30 38 1 13 15
M  V30 39 1 22 23
M  V30 40 1 28 29
M  V30 END BOND
M  V30 BEGIN COLLECTION
M  V30 MDLV30/STEABS ATOMS=(3 8 10 17)
M  V30 END COLLECTION
M  V30 END CTAB
M  END
>  <ID>
CID135413536

>  <name>
aprepitant

>  <smiles>
C[C@H](c1cc(cc(c1)C(F)(F)F)C(F)(F)F)O[C@@H]2[C@@H](N(CCO2)Cc3n[nH]c(=O)[nH]3)c4ccc(cc4)F

$$$$
CID2826718
Actelion Java MolfileCreator 2.0

  0  0  0  0  0  0              0 V3000
M  V30 BEGIN CTAB
M  V30 COUNTS 77 80 0 0 0
M  V30 BEGIN ATOM
M  V30 1 O 22.3651 1.2961 0.0 0
M  V30 2 C 23.5938 0.6171 0.0 0
M  V30 3 N 25.009 1.2812 0.0 0
M  V30 4 C 23.6438 -0.799 0.0 0 CFG=1
M  V30 5 C 26.0447 0.4557 0.0 0 CFG=2
M  V30 6 C 25.4529 2.7021 0.0 0
M  V30 7 N 23.0016 -1.8172 0.0 0
M  V30 8 C 25.1972 -0.8497 0.0 0 CFG=2
M  V30 9 C 25.8195 -1.114 0.0 0
M  V30 10 C 27.372 1.2028 0.0 0 CFG=2
M  V30 11 C 26.9571 2.6496 0.0 0
M  V30 12 C 21.4334 -2.1953 0.0 0
M  V30 13 O 25.8194 -2.4001 0.0 0
M  V30 14 C 26.4971 0.0122 0.0 0
M  V30 15 O 26.6768 -2.2386 0.0 0
M  V30 16 N 24.2974 -1.344 0.0 0
M  V30 17 O 28.7863 0.688 0.0 0
M  V30 18 O 20.5267 -1.1024 0.0 0
M  V30 19 C 21.1421 -3.5709 0.0 0 CFG=1
M  V30 20 C 27.7937 -0.1276 0.0 0
M  V30 21 C 23.5055 0.0073 0.0 0 CFG=2
M  V30 22 N 22.3281 -4.4975 0.0 0
M  V30 23 C 19.7106 -4.036 0.0 0 CFG=2
M  V30 24 N 28.2841 -1.5506 0.0 0
M  V30 25 N 24.3304 1.3441 0.0 0
M  V30 26 C 22.0728 0.256 0.0 0 CFG=2
M  V30 27 C 23.6316 -3.7449 0.0 0
M  V30 28 O 18.5921 -3.0288 0.0 0
M  V30 29 C 19.3977 -5.5082 0.0 0 CFG=1
M  V30 30 C 23.7292 2.7067 0.0 0
M  V30 31 O 21.7463 1.8527 0.0 0
M  V30 32 C 20.8549 -0.7443 0.0 0
M  V30 33 O 24.9844 -4.4047 0.0 0
M  V30 34 C 23.4727 -2.307 0.0 0 CFG=1
M  V30 35 O 17.9662 -5.9733 0.0 0
M  V30 36 C 20.5162 -6.5153 0.0 0
M  V30 37 C 24.663 3.8963 0.0 0
M  V30 38 C 19.5315 0.0413 0.0 0 CFG=2
M  V30 39 N 21.9802 -1.7726 0.0 0
M  V30 40 C 24.2972 -0.9689 0.0 0
M  V30 41 C 20.2033 -7.9876 0.0 0
M  V30 42 C 21.9477 -6.0502 0.0 0
M  V30 43 N 24.0508 5.2713 0.0 0
M  V30 44 N 18.2487 -0.7525 0.0 0
M  V30 45 C 19.6572 1.5014 0.0 0
M  V30 46 C 21.3931 -0.5682 0.0 0
M  V30 47 C 21.9784 -0.4206 0.0 0
M  V30 48 C 23.1328 0.2827 0.0 0 CFG=2
M  V30 49 C 21.3218 -8.9947 0.0 0
M  V30 50 C 23.0662 -7.0574 0.0 0
M  V30 51 C 16.9452 0.0 0.0 0
M  V30 52 O 18.4711 2.4281 0.0 0
M  V30 53 N 21.0467 1.9738 0.0 0
M  V30 54 O 19.8478 -0.5901 0.0 0
M  V30 55 C 22.1231 0.8598 0.0 0 CFG=1
M  V30 56 O 23.5452 1.6768 0.0 0
M  V30 57 C 22.7533 -8.5296 0.0 0
M  V30 58 O 16.9452 1.5051 0.0 0
M  V30 59 C 15.6417 -0.7525 0.0 0
M  V30 60 C 23.5677 1.0515 0.0 0 CFG=2
M  V30 61 O 23.8718 -9.5367 0.0 0
M  V30 62 C 14.3383 0.0 0.0 0
M  V30 63 O 24.4659 -0.213 0.0 0
M  V30 64 C 24.3332 2.3607 0.0 0
M  V30 65 C 13.0348 -0.7525 0.0 0
M  V30 66 C 11.7313 0.0 0.0 0
M  V30 67 C 10.4278 -0.7525 0.0 0
M  V30 68 C 9.1243 0.0 0.0 0
M  V30 69 C 7.8208 -0.7525 0.0 0
M  V30 70 C 6.5174 0.0 0.0 0
M  V30 71 C 5.2139 -0.7525 0.0 0
M  V30 72 C 3.9104 0.0 0.0 0
M  V30 73 C 5.2139 -2.2576 0.0 0
M  V30 74 C 2.6069 -0.7525 0.0 0
M  V30 75 C 1.3034 0.0 0.0 0
M  V30 76 C 2.6069 -2.2576 0.0 0
M  V30 77 C 0.0 -0.7525 0.0 0
M  V30 END ATOM
M  V30 BEGIN BOND
M  V30 1 2 1 2
M  V30 2 1 2 3
M  V30 3 1 4 2
M  V30 4 1 5 3 CFG=1
M  V30 5 1 3 6
M  V30 6 1 4 7 CFG=3
M  V30 7 1 8 4
M  V30 8 1 5 9
M  V30 9 1 10 5
M  V30 10 1 6 11
M  V30 11 1 7 12
M  V30 12 1 8 13 CFG=1
M  V30 13 1 8 14
M  V30 14 2 9 15
M  V30 15 1 9 16
M  V30 16 1 10 17 CFG=3
M  V30 17 2 12 18
M  V30 18 1 19 12
M  V30 19 1 14 20
M  V30 20 1 21 16
M  V30 21 1 19 22 CFG=1
M  V30 22 1 23 19
M  V30 23 1 20 24
M  V30 24 1 21 25 CFG=1
M  V30 25 1 26 21
M  V30 26 1 22 27
M  V30 27 1 23 28 CFG=1
M  V30 28 1 29 23
M  V30 29 1 25 30
M  V30 30 1 26 31 CFG=1
M  V30 31 1 26 32
M  V30 32 2 27 33
M  V30 33 1 34 27
M  V30 34 1 29 35 CFG=3
M  V30 35 1 29 36
M  V30 36 1 30 37
M  V30 37 1 38 32
M  V30 38 1 34 39 CFG=1
M  V30 39 1 34 40
M  V30 40 2 36 41
M  V30 41 1 36 42
M  V30 42 1 37 43
M  V30 43 1 38 44 CFG=3
M  V30 44 1 38 45
M  V30 45 1 39 46
M  V30 46 1 39 47
M  V30 47 1 48 40
M  V30 48 1 41 49
M  V30 49 2 42 50
M  V30 50 1 44 51
M  V30 51 2 45 52
M  V30 52 1 45 53
M  V30 53 2 46 54
M  V30 54 1 55 46
M  V30 55 1 48 56 CFG=3
M  V30 56 2 49 57
M  V30 57 2 51 58
M  V30 58 1 51 59
M  V30 59 1 60 55
M  V30 60 1 57 61
M  V30 61 1 59 62
M  V30 62 1 60 63 CFG=1
M  V30 63 1 60 64
M  V30 64 1 62 65
M  V30 65 1 65 66
M  V30 66 1 66 67
M  V30 67 1 67 68
M  V30 68 1 68 69
M  V30 69 1 69 70
M  V30 70 1 70 71
M  V30 71 1 71 72
M  V30 72 1 71 73
M  V30 73 1 72 74
M  V30 74 1 74 75
M  V30 75 1 74 76
M  V30 76 1 75 77
M  V30 77 1 10 11
M  V30 78 1 47 48
M  V30 79 1 50 57
M  V30 80 1 55 53 CFG=1
M  V30 END BOND
M  V30 BEGIN COLLECTION
M  V30 MDLV30/STEABS ATOMS=(14 4 5 8 10 19 21 23 26 29 34 38 48 55 60)
M  V30 END COLLECTION
M  V30 END CTAB
M  END
>  <ID>
CID2826718

>  <name>
caspofungin

>  <smiles>
CCC(C)CC(C)CCCCCCCCC(=O)N[C@H]1C[C@H]([C@H](NC(=O)[C@@H]2[C@H](CCN2C(=O)[C@@H](NC(=O)[C@@H](NC(=O)[C@@H]3C[C@H](CN3C(=O)[C@@H](NC1=O)[C@@H](C)O)O)[C@@H]([C@H](c4ccc(cc4)O)O)O)[C@@H](CCN)O)O)NCCN)O

$$$$
CID 4748
Actelion Java MolfileCreator 2.0

  0  0  0  0  0  0              0 V3000
M  V30 BEGIN CTAB
M  V30 COUNTS 27 30 0 0 0
M  V30 BEGIN ATOM
M  V30 1 Cl 5.1961 2.4999 0.0 0
M  V30 2 C 5.1961 1.4999 0.0 0
M  V30 3 C 4.3301 1.0 0.0 0
M  V30 4 C 6.0621 0.9999 0.0 0
M  V30 5 C 4.3301 0.0 0.0 0
M  V30 6 C 6.0621 0.0 0.0 0
M  V30 7 N 3.4641 -0.5 0.0 0
M  V30 8 C 5.1961 -0.5 0.0 0
M  V30 9 C 3.4641 -1.5 0.0 0
M  V30 10 C 2.598 0.0 0.0 0
M  V30 11 S 5.1961 -1.5 0.0 0
M  V30 12 C 4.3301 -2.0 0.0 0
M  V30 13 C 2.598 -1.9999 0.0 0
M  V30 14 C 1.732 -0.5 0.0 0
M  V30 15 C 4.3301 -3.0 0.0 0
M  V30 16 C 2.598 -3.0 0.0 0
M  V30 17 C 0.866 0.0 0.0 0
M  V30 18 C 3.4641 -3.4999 0.0 0
M  V30 19 N 0.0 -0.5 0.0 0
M  V30 20 C -0.866 0.0 0.0 0
M  V30 21 C 0.0 -1.4999 0.0 0
M  V30 22 C -1.732 -0.4999 0.0 0
M  V30 23 C -0.866 -1.9999 0.0 0
M  V30 24 N -1.732 -1.4999 0.0 0
M  V30 25 C -2.598 -1.9999 0.0 0
M  V30 26 C -3.4641 -1.4999 0.0 0
M  V30 27 O -4.3301 -1.9999 0.0 0
M  V30 END ATOM
M  V30 BEGIN BOND
M  V30 1 1 1 2
M  V30 2 2 2 3
M  V30 3 1 2 4
M  V30 4 1 3 5
M  V30 5 2 4 6
M  V30 6 1 5 7
M  V30 7 2 5 8
M  V30 8 1 7 9
M  V30 9 1 7 10
M  V30 10 1 8 11
M  V30 11 2 9 12
M  V30 12 1 9 13
M  V30 13 1 10 14
M  V30 14 1 12 15
M  V30 15 2 13 16
M  V30 16 1 14 17
M  V30 17 2 15 18
M  V30 18 1 17 19
M  V30 19 1 19 20
M  V30 20 1 19 21
M  V30 21 1 20 22
M  V30 22 1 21 23
M  V30 23 1 22 24
M  V30 24 1 24 25
M  V30 25 1 25 26
M  V30 26 1 26 27
M  V30 27 1 6 8
M  V30 28 1 11 12
M  V30 29 1 16 18
M  V30 30 1 23 24
M  V30 END BOND
M  V30 END CTAB
M  END
>  <ID>
CID 4748

>  <name>
perphenazine

>  <smiles>
C1CN(CCN1CCCN2c3ccccc3Sc4c2cc(cc4)Cl)CCO

$$$$
CID53380437
Actelion Java MolfileCreator 2.0

  0  0  0  0  0  0              0 V3000
M  V30 BEGIN CTAB
M  V30 COUNTS 40 45 0 0 0
M  V30 BEGIN ATOM
M  V30 1 F 3.8971 1.5 0.0 0
M  V30 2 C 3.8971 0.0 0.0 0
M  V30 3 C 2.598 -0.75 0.0 0
M  V30 4 C 5.1961 -0.7499 0.0 0
M  V30 5 C 1.299 0.0 0.0 0
M  V30 6 C 2.598 -2.25 0.0 0
M  V30 7 N 5.1961 -2.2499 0.0 0
M  V30 8 C 6.4951 0.0 0.0 0
M  V30 9 O 1.299 1.5 0.0 0
M  V30 10 N 0.0 -0.75 0.0 0
M  V30 11 C 3.8971 -2.9999 0.0 0
M  V30 12 F 5.7451 1.299 0.0 0
M  V30 13 F 7.7942 0.75 0.0 0
M  V30 14 F 7.2451 -1.299 0.0 0
M  V30 15 C -1.299 0.0 0.0 0
M  V30 16 C 0.0 -2.2499 0.0 0
M  V30 17 C -2.598 -0.7499 0.0 0
M  V30 18 C -1.299 -2.9999 0.0 0
M  V30 19 C -2.598 -2.2499 0.0 0
M  V30 20 N -3.8971 -2.9999 0.0 0
M  V30 21 C -5.346 -2.6117 0.0 0
M  V30 22 C -4.2853 -4.4488 0.0 0
M  V30 23 C -5.7342 -4.0606 0.0 0
M  V30 24 N -7.0332 -4.8106 0.0 0
M  V30 25 C -5.5384 -5.5478 0.0 0
M  V30 26 N -8.4035 -4.2005 0.0 0
M  V30 27 C -7.19 -6.3024 0.0 0
M  V30 28 C -4.1526 -6.1218 0.0 0
M  V30 29 C -9.4072 -5.3152 0.0 0
M  V30 30 C -8.6572 -6.6143 0.0 0
M  V30 31 N -2.7668 -6.6958 0.0 0
M  V30 32 C -9.2673 -7.9846 0.0 0
M  V30 33 N -10.7591 -8.1414 0.0 0
M  V30 34 C -8.3857 -9.1981 0.0 0
M  V30 35 C -11.3692 -9.5117 0.0 0
M  V30 36 C -8.9958 -10.5684 0.0 0
M  V30 37 C -6.8939 -9.3549 0.0 0
M  V30 38 N -10.4875 -10.7252 0.0 0
M  V30 39 N -7.881 -11.5721 0.0 0
M  V30 40 C -6.582 -10.8221 0.0 0
M  V30 END ATOM
M  V30 BEGIN BOND
M  V30 1 1 1 2
M  V30 2 2 2 3
M  V30 3 1 2 4
M  V30 4 1 3 5
M  V30 5 1 3 6
M  V30 6 2 4 7
M  V30 7 1 4 8
M  V30 8 2 5 9
M  V30 9 1 5 10
M  V30 10 2 6 11
M  V30 11 1 8 12
M  V30 12 1 8 13
M  V30 13 1 8 14
M  V30 14 1 10 15
M  V30 15 1 10 16
M  V30 16 1 15 17
M  V30 17 1 16 18
M  V30 18 1 17 19
M  V30 19 1 19 20
M  V30 20 1 20 21
M  V30 21 1 20 22
M  V30 22 1 21 23
M  V30 23 1 23 24
M  V30 24 1 23 25
M  V30 25 1 24 26
M  V30 26 1 24 27
M  V30 27 1 25 28
M  V30 28 2 26 29
M  V30 29 2 27 30
M  V30 30 3 28 31
M  V30 31 1 30 32
M  V30 32 2 32 33
M  V30 33 1 32 34
M  V30 34 1 33 35
M  V30 35 2 34 36
M  V30 36 1 34 37
M  V30 37 2 35 38
M  V30 38 1 36 39
M  V30 39 2 37 40
M  V30 40 1 7 11
M  V30 41 1 18 19
M  V30 42 1 22 23
M  V30 43 1 29 30
M  V30 44 1 36 38
M  V30 45 1 39 40
M  V30 END BOND
M  V30 END CTAB
M  END
>  <ID>
CID53380437

>  <name>
itacitinib

>  <smiles>
C1CN(CCC1N2CC(C2)(CC#N)n3cc(cn3)-c4c5cc[nH]c5ncn4)C(=O)c6c(c(ncc6)C(F)(F)F)F

$$$$
CID3047798
Actelion Java MolfileCreator 2.0

  0  0  0  0  0  0              0 V3000
M  V30 BEGIN CTAB
M  V30 COUNTS 34 36 0 0 0
M  V30 BEGIN ATOM
M  V30 1 Cl 12.9903 3.75 0.0 0
M  V30 2 C 12.9903 2.25 0.0 0
M  V30 3 C 11.6913 1.5 0.0 0
M  V30 4 C 14.2894 1.5 0.0 0
M  V30 5 C 11.6913 0.0 0.0 0
M  V30 6 C 14.2894 0.0 0.0 0
M  V30 7 O 10.3923 -0.75 0.0 0
M  V30 8 C 12.9903 -0.75 0.0 0
M  V30 9 C 9.0932 0.0 0.0 0
M  V30 10 C 12.9903 -2.25 0.0 0
M  V30 11 C 7.7942 -0.75 0.0 0
M  V30 12 N 12.9903 -3.75 0.0 0
M  V30 13 O 7.7942 -2.25 0.0 0
M  V30 14 C 6.4951 0.0 0.0 0
M  V30 15 N 5.1961 -0.75 0.0 0
M  V30 16 C 3.8971 0.0 0.0 0
M  V30 17 C 2.598 -0.75 0.0 0
M  V30 18 C 4.6471 1.299 0.0 0
M  V30 19 C 3.1471 1.299 0.0 0
M  V30 20 N 1.299 0.0 0.0 0
M  V30 21 C 0.0 -0.75 0.0 0
M  V30 22 C -1.299 0.0 0.0 0
M  V30 23 C 0.0 -2.25 0.0 0
M  V30 24 C -2.598 -0.75 0.0 0
M  V30 25 C -1.299 -3.0 0.0 0
M  V30 26 C -2.598 -2.25 0.0 0
M  V30 27 C -3.8971 -3.0 0.0 0
M  V30 28 N -5.1961 -2.25 0.0 0
M  V30 29 C -3.8971 -4.5 0.0 0
M  V30 30 N -6.4951 -3.0 0.0 0
M  V30 31 C -5.1961 -5.25 0.0 0
M  V30 32 C -2.598 -5.25 0.0 0
M  V30 33 C -6.4951 -4.5 0.0 0
M  V30 34 O -7.7942 -5.25 0.0 0
M  V30 END ATOM
M  V30 BEGIN BOND
M  V30 1 1 1 2
M  V30 2 2 2 3
M  V30 3 1 2 4
M  V30 4 1 3 5
M  V30 5 2 4 6
M  V30 6 1 5 7
M  V30 7 2 5 8
M  V30 8 1 7 9
M  V30 9 1 8 10
M  V30 10 1 9 11
M  V30 11 3 10 12
M  V30 12 1 11 13
M  V30 13 1 11 14
M  V30 14 1 14 15
M  V30 15 1 15 16
M  V30 16 1 16 17
M  V30 17 1 16 18
M  V30 18 1 16 19
M  V30 19 1 17 20
M  V30 20 1 20 21
M  V30 21 2 21 22
M  V30 22 1 21 23
M  V30 23 1 22 24
M  V30 24 2 23 25
M  V30 25 2 24 26
M  V30 26 1 26 27
M  V30 27 2 27 28
M  V30 28 1 27 29
M  V30 29 1 28 30
M  V30 30 1 29 31
M  V30 31 1 29 32
M  V30 32 1 30 33
M  V30 33 2 33 34
M  V30 34 1 6 8
M  V30 35 1 25 26
M  V30 36 1 31 33
M  V30 END BOND
M  V30 END CTAB
M  END
>  <ID>
CID3047798

>  <name>
oberadilol

>  <smiles>
CC1CC(=O)NN=C1c2ccc(cc2)NCC(C)(C)NCC(COc3c(ccc(c3)Cl)C#N)O

$$$$
CID 11319053
Actelion Java MolfileCreator 2.0

  0  0  0  0  0  0              0 V3000
M  V30 BEGIN CTAB
M  V30 COUNTS 40 44 0 0 0
M  V30 BEGIN ATOM
M  V30 1 F 5.8718 -0.9901 0.0 0
M  V30 2 C 6.3057 -0.0891 0.0 0
M  V30 3 C 7.3029 -0.0144 0.0 0
M  V30 4 C 5.7424 0.737 0.0 0
M  V30 5 F 7.8662 -0.8407 0.0 0
M  V30 6 C 7.7368 0.8864 0.0 0
M  V30 7 C 6.1763 1.638 0.0 0
M  V30 8 C 4.7452 0.6623 0.0 0 CFG=1
M  V30 9 C 7.1735 1.7127 0.0 0
M  V30 10 C 4.2452 1.5283 0.0 0
M  V30 11 C 4.3798 -0.2685 0.0 0
M  V30 12 N 3.2563 1.6773 0.0 0
M  V30 13 C 3.4243 -0.5633 0.0 0
M  V30 14 C 2.5233 0.9972 0.0 0
M  V30 15 C 2.9616 2.6329 0.0 0
M  V30 16 C 2.598 0.0 0.0 0 CFG=2
M  V30 17 O 1.5924 1.3625 0.0 0
M  V30 18 C 3.6418 3.366 0.0 0
M  V30 19 N 1.732 -0.5 0.0 0
M  V30 20 F 4.3748 2.6858 0.0 0
M  V30 21 F 4.3219 4.099 0.0 0
M  V30 22 F 2.9087 4.0461 0.0 0
M  V30 23 C 0.866 0.0 0.0 0
M  V30 24 O 0.866 1.0 0.0 0
M  V30 25 N 0.0 -0.5 0.0 0
M  V30 26 C -0.866 0.0 0.0 0
M  V30 27 C 0.0 -1.4999 0.0 0
M  V30 28 C -1.732 -0.4999 0.0 0
M  V30 29 C -0.866 -1.9999 0.0 0
M  V30 30 C -1.732 -1.4999 0.0 0
M  V30 31 N -2.598 -1.9999 0.0 0
M  V30 32 C -3.5116 -1.5932 0.0 0
M  V30 33 C -2.7026 -2.9945 0.0 0
M  V30 34 O -3.7195 -0.6151 0.0 0
M  V30 35 N -4.1807 -2.3364 0.0 0
M  V30 36 C -3.6807 -3.2024 0.0 0
M  V30 37 C -2.0334 -3.7376 0.0 0
M  V30 38 N -3.9897 -4.1534 0.0 0
M  V30 39 C -2.3424 -4.6887 0.0 0
M  V30 40 C -3.3206 -4.8966 0.0 0
M  V30 END ATOM
M  V30 BEGIN BOND
M  V30 1 1 1 2
M  V30 2 2 2 3
M  V30 3 1 2 4
M  V30 4 1 3 5
M  V30 5 1 3 6
M  V30 6 2 4 7
M  V30 7 1 8 4 CFG=3
M  V30 8 2 6 9
M  V30 9 1 8 10
M  V30 10 1 8 11
M  V30 11 1 10 12
M  V30 12 1 11 13
M  V30 13 1 12 14
M  V30 14 1 12 15
M  V30 15 1 16 13
M  V30 16 2 14 17
M  V30 17 1 15 18
M  V30 18 1 16 19 CFG=1
M  V30 19 1 18 20
M  V30 20 1 18 21
M  V30 21 1 18 22
M  V30 22 1 19 23
M  V30 23 2 23 24
M  V30 24 1 23 25
M  V30 25 1 25 26
M  V30 26 1 25 27
M  V30 27 1 26 28
M  V30 28 1 27 29
M  V30 29 1 28 30
M  V30 30 1 30 31
M  V30 31 1 31 32
M  V30 32 1 31 33
M  V30 33 2 32 34
M  V30 34 1 32 35
M  V30 35 2 33 36
M  V30 36 1 33 37
M  V30 37 1 36 38
M  V30 38 2 37 39
M  V30 39 2 38 40
M  V30 40 1 7 9
M  V30 41 1 14 16
M  V30 42 1 29 30
M  V30 43 1 35 36
M  V30 44 1 39 40
M  V30 END BOND
M  V30 BEGIN COLLECTION
M  V30 MDLV30/STEABS ATOMS=(2 8 16)
M  V30 END COLLECTION
M  V30 END CTAB
M  END
>  <ID>
CID 11319053

>  <name>
telcagepant

>  <smiles>
C1C[C@H](C(=O)N(C[C@@H]1c2c(c(ccc2)F)F)CC(F)(F)F)NC(=O)N3CCC(CC3)n4c5c([nH]c4=O)nccc5

$$$$
CID42641863
Actelion Java MolfileCreator 2.0

  0  0  0  0  0  0              0 V3000
M  V30 BEGIN CTAB
M  V30 COUNTS 40 43 0 0 0
M  V30 BEGIN ATOM
M  V30 1 Cl 2.598 2.25 0.0 0
M  V30 2 C 3.8971 1.5 0.0 0
M  V30 3 C 3.8971 0.0 0.0 0
M  V30 4 C 5.1961 2.25 0.0 0
M  V30 5 S 2.598 -0.75 0.0 0
M  V30 6 C 5.1961 -0.75 0.0 0
M  V30 7 C 6.4951 1.5 0.0 0
M  V30 8 O 1.848 -2.049 0.0 0
M  V30 9 O 3.348 -2.049 0.0 0
M  V30 10 N 1.299 0.0 0.0 0
M  V30 11 C 6.4951 0.0 0.0 0
M  V30 12 C 7.7942 2.25 0.0 0
M  V30 13 C 0.0 -0.75 0.0 0
M  V30 14 C 9.2942 2.25 0.0 0
M  V30 15 C 8.5442 3.549 0.0 0
M  V30 16 C -1.299 0.0 0.0 0
M  V30 17 C 0.0 -2.25 0.0 0
M  V30 18 O -1.299 1.5 0.0 0
M  V30 19 C -2.598 -0.75 0.0 0
M  V30 20 C -1.299 -3.0 0.0 0
M  V30 21 C -2.598 2.25 0.0 0
M  V30 22 C -2.598 -2.25 0.0 0
M  V30 23 C -1.299 -4.5 0.0 0
M  V30 24 C -2.598 3.75 0.0 0
M  V30 25 C -3.8971 1.5 0.0 0
M  V30 26 O 0.0 -5.25 0.0 0
M  V30 27 N -2.598 -5.25 0.0 0
M  V30 28 Cl -1.299 4.5 0.0 0
M  V30 29 C -3.8971 4.5 0.0 0
M  V30 30 C -5.1961 2.25 0.0 0
M  V30 31 C -2.598 -6.75 0.0 0
M  V30 32 C -5.1961 3.75 0.0 0
M  V30 33 F -6.4951 1.5 0.0 0
M  V30 34 C -1.098 -6.75 0.0 0
M  V30 35 C -2.598 -8.25 0.0 0
M  V30 36 C -4.098 -6.75 0.0 0
M  V30 37 C -6.4951 4.5 0.0 0
M  V30 38 C -6.4951 6.0 0.0 0
M  V30 39 O -5.1961 6.75 0.0 0
M  V30 40 O -7.7942 6.75 0.0 0
M  V30 END ATOM
M  V30 BEGIN BOND
M  V30 1 1 1 2
M  V30 2 2 2 3
M  V30 3 1 2 4
M  V30 4 1 3 5
M  V30 5 1 3 6
M  V30 6 2 4 7
M  V30 7 2 5 8
M  V30 8 2 5 9
M  V30 9 1 5 10
M  V30 10 2 6 11
M  V30 11 1 7 12
M  V30 12 1 10 13
M  V30 13 1 12 14
M  V30 14 1 12 15
M  V30 15 2 13 16
M  V30 16 1 13 17
M  V30 17 1 16 18
M  V30 18 1 16 19
M  V30 19 2 17 20
M  V30 20 1 18 21
M  V30 21 2 19 22
M  V30 22 1 20 23
M  V30 23 2 21 24
M  V30 24 1 21 25
M  V30 25 2 23 26
M  V30 26 1 23 27
M  V30 27 1 24 28
M  V30 28 1 24 29
M  V30 29 2 25 30
M  V30 30 1 27 31
M  V30 31 2 29 32
M  V30 32 1 30 33
M  V30 33 1 31 34
M  V30 34 1 31 35
M  V30 35 1 31 36
M  V30 36 1 32 37
M  V30 37 1 37 38
M  V30 38 2 38 39
M  V30 39 1 38 40
M  V30 40 1 7 11
M  V30 41 1 14 15
M  V30 42 1 20 22
M  V30 43 1 30 32
M  V30 END BOND
M  V30 END CTAB
M  END
>  <ID>
CID42641863

>  <name>
vidupiprant

>  <smiles>
CC(C)(C)NC(=O)c1cc(c(cc1)Oc2c(cc(c(c2)F)CC(=O)O)Cl)NS(=O)(=O)c3c(cc(cc3)C4CC4)Cl

$$$$
CID56599306
Actelion Java MolfileCreator 2.0

  0  0  0  0  0  0              0 V3000
M  V30 BEGIN CTAB
M  V30 COUNTS 37 40 0 0 0
M  V30 BEGIN ATOM
M  V30 1 Cl 5.1961 -5.25 0.0 0
M  V30 2 C 6.4951 -4.5 0.0 0
M  V30 3 C 6.4951 -3.0 0.0 0
M  V30 4 C 7.7942 -5.25 0.0 0
M  V30 5 N 5.1961 -2.25 0.0 0
M  V30 6 C 7.7942 -2.25 0.0 0
M  V30 7 C 9.0932 -4.5 0.0 0
M  V30 8 C 5.1961 -0.75 0.0 0
M  V30 9 C 9.0932 -3.0 0.0 0
M  V30 10 N 6.4951 0.0 0.0 0
M  V30 11 C 3.8971 0.0 0.0 0
M  V30 12 O 10.3923 -2.25 0.0 0
M  V30 13 C 6.4951 1.5 0.0 0
M  V30 14 N 3.8971 1.5 0.0 0
M  V30 15 N 2.598 -0.75 0.0 0
M  V30 16 C 11.6913 -3.0 0.0 0
M  V30 17 C 5.1961 2.25 0.0 0
M  V30 18 C 7.7942 2.25 0.0 0
M  V30 19 S 1.299 0.0 0.0 0
M  V30 20 C 5.1961 3.75 0.0 0
M  V30 21 C 7.7942 3.75 0.0 0
M  V30 22 O 2.049 1.299 0.0 0
M  V30 23 O 0.549 1.299 0.0 0
M  V30 24 C 0.0 -0.75 0.0 0
M  V30 25 C 6.4951 4.5 0.0 0
M  V30 26 C 0.0 -2.25 0.0 0
M  V30 27 C -1.299 0.0 0.0 0
M  V30 28 C -1.299 -3.0 0.0 0
M  V30 29 C -2.598 -0.75 0.0 0
M  V30 30 N -1.299 -4.5 0.0 0
M  V30 31 C -2.598 -2.25 0.0 0
M  V30 32 C 0.0 -5.25 0.0 0
M  V30 33 O 1.299 -4.5 0.0 0
M  V30 34 C 0.0 -6.75 0.0 0
M  V30 35 N -1.5 -6.75 0.0 0
M  V30 36 C 0.0 -8.25 0.0 0
M  V30 37 C 1.5 -6.75 0.0 0
M  V30 END ATOM
M  V30 BEGIN BOND
M  V30 1 1 1 2
M  V30 2 2 2 3
M  V30 3 1 2 4
M  V30 4 1 3 5
M  V30 5 1 3 6
M  V30 6 2 4 7
M  V30 7 1 5 8
M  V30 8 2 6 9
M  V30 9 2 8 10
M  V30 10 1 8 11
M  V30 11 1 9 12
M  V30 12 1 10 13
M  V30 13 2 11 14
M  V30 14 1 11 15
M  V30 15 1 12 16
M  V30 16 1 13 17
M  V30 17 2 13 18
M  V30 18 1 15 19
M  V30 19 2 17 20
M  V30 20 1 18 21
M  V30 21 2 19 22
M  V30 22 2 19 23
M  V30 23 1 19 24
M  V30 24 1 20 25
M  V30 25 2 24 26
M  V30 26 1 24 27
M  V30 27 1 26 28
M  V30 28 2 27 29
M  V30 29 1 28 30
M  V30 30 2 28 31
M  V30 31 1 30 32
M  V30 32 2 32 33
M  V30 33 1 32 34
M  V30 34 1 34 35
M  V30 35 1 34 36
M  V30 36 1 34 37
M  V30 37 1 7 9
M  V30 38 1 14 17
M  V30 39 2 21 25
M  V30 40 1 29 31
M  V30 END BOND
M  V30 END CTAB
M  END
>  <ID>
CID56599306

>  <name>
pilaralisib

>  <smiles>
CC(C)(C(=O)Nc1cc(ccc1)S(=O)(=O)Nc2nc3ccccc3nc2Nc4c(ccc(c4)OC)Cl)N

$$$$
CID25127713
Actelion Java MolfileCreator 2.0

  0  0  0  0  0  0              0 V3000
M  V30 BEGIN CTAB
M  V30 COUNTS 33 36 0 0 0
M  V30 BEGIN ATOM
M  V30 1 Cl 2.598 -2.0 0.0 0
M  V30 2 C 3.4641 -1.5 0.0 0
M  V30 3 C 4.3301 -2.0 0.0 0
M  V30 4 C 3.4641 -0.5 0.0 0
M  V30 5 F 4.3301 -3.0 0.0 0
M  V30 6 C 5.1961 -1.4999 0.0 0
M  V30 7 Cl 2.598 0.0 0.0 0
M  V30 8 C 4.3301 0.0 0.0 0
M  V30 9 N 6.0621 -1.9999 0.0 0
M  V30 10 C 5.1961 -0.5 0.0 0
M  V30 11 C 6.9282 -1.4999 0.0 0
M  V30 12 N 7.7942 -1.9999 0.0 0
M  V30 13 C 6.9282 -0.4999 0.0 0
M  V30 14 C 8.6602 -1.4999 0.0 0
M  V30 15 C 7.7942 0.0 0.0 0
M  V30 16 C 6.0621 0.0 0.0 0
M  V30 17 N 8.6602 -0.4999 0.0 0
M  V30 18 C 7.7942 1.0 0.0 0
M  V30 19 C 6.0621 1.0 0.0 0
M  V30 20 C 6.9282 1.5 0.0 0
M  V30 21 O 5.1961 1.5 0.0 0
M  V30 22 O 6.9282 2.5 0.0 0
M  V30 23 C 5.1961 2.5 0.0 0
M  V30 24 C 7.7942 3.0 0.0 0
M  V30 25 C 4.3301 3.0 0.0 0
M  V30 26 C 6.0621 3.0 0.0 0
M  V30 27 C 4.3301 4.0 0.0 0
M  V30 28 C 6.0621 4.0 0.0 0
M  V30 29 N 5.1961 4.5 0.0 0
M  V30 30 C 5.1961 5.5 0.0 0
M  V30 31 O 6.0621 6.0 0.0 0
M  V30 32 C 4.3301 6.0 0.0 0
M  V30 33 C 4.3301 7.0 0.0 0
M  V30 END ATOM
M  V30 BEGIN BOND
M  V30 1 1 1 2
M  V30 2 2 2 3
M  V30 3 1 2 4
M  V30 4 1 3 5
M  V30 5 1 3 6
M  V30 6 1 4 7
M  V30 7 2 4 8
M  V30 8 1 6 9
M  V30 9 2 6 10
M  V30 10 1 9 11
M  V30 11 2 11 12
M  V30 12 1 11 13
M  V30 13 1 12 14
M  V30 14 1 13 15
M  V30 15 2 13 16
M  V30 16 2 14 17
M  V30 17 2 15 18
M  V30 18 1 16 19
M  V30 19 1 18 20
M  V30 20 1 19 21
M  V30 21 1 20 22
M  V30 22 1 21 23
M  V30 23 1 22 24
M  V30 24 1 23 25
M  V30 25 1 23 26
M  V30 26 1 25 27
M  V30 27 1 26 28
M  V30 28 1 27 29
M  V30 29 1 29 30
M  V30 30 2 30 31
M  V30 31 1 30 32
M  V30 32 2 32 33
M  V30 33 1 8 10
M  V30 34 1 15 17
M  V30 35 2 19 20
M  V30 36 1 28 29
M  V30 END BOND
M  V30 END CTAB
M  END
>  <ID>
CID25127713

>  <name>
poziotinib

>  <smiles>
COc1c(cc2c(c1)ncnc2Nc3c(c(c(cc3)Cl)Cl)F)OC4CCN(CC4)C(=O)C=C

$$$$
CID11671467
Actelion Java MolfileCreator 2.0

  0  0  0  0  0  0              0 V3000
M  V30 BEGIN CTAB
M  V30 COUNTS 40 43 0 0 0
M  V30 BEGIN ATOM
M  V30 1 P 3.8971 0.0 0.0 0
M  V30 2 O 4.6471 -1.299 0.0 0
M  V30 3 O 2.598 -0.75 0.0 0
M  V30 4 O 5.1961 0.75 0.0 0
M  V30 5 O 3.1471 1.299 0.0 0
M  V30 6 C 1.299 0.0 0.0 0
M  V30 7 N 0.0 -0.75 0.0 0
M  V30 8 C -1.299 0.0 0.0 0
M  V30 9 C 0.0 -2.25 0.0 0
M  V30 10 N -1.299 1.5 0.0 0
M  V30 11 C -2.598 -0.75 0.0 0
M  V30 12 O 1.299 -3.0 0.0 0
M  V30 13 C -1.299 -3.0 0.0 0
M  V30 14 C -2.598 2.25 0.0 0
M  V30 15 O -2.598 -2.25 0.0 0
M  V30 16 C -3.8971 0.0 0.0 0
M  V30 17 C -2.049 -4.299 0.0 0
M  V30 18 C -0.549 -4.299 0.0 0
M  V30 19 N -2.598 3.75 0.0 0
M  V30 20 C -3.8971 1.5 0.0 0
M  V30 21 C -3.8971 4.5 0.0 0
M  V30 22 N -3.8971 6.0 0.0 0
M  V30 23 C -5.1961 3.75 0.0 0
M  V30 24 C -5.1961 6.75 0.0 0
M  V30 25 F -5.1961 2.25 0.0 0
M  V30 26 C -6.4951 4.5 0.0 0
M  V30 27 N -6.4951 6.0 0.0 0
M  V30 28 N -5.1961 8.25 0.0 0
M  V30 29 C -6.4951 9.0 0.0 0
M  V30 30 C -6.4951 10.5 0.0 0
M  V30 31 C -7.7942 8.25 0.0 0
M  V30 32 C -7.7942 11.25 0.0 0
M  V30 33 C -9.0932 9.0 0.0 0
M  V30 34 O -7.7942 12.75 0.0 0
M  V30 35 C -9.0932 10.5 0.0 0
M  V30 36 O -10.3923 8.25 0.0 0
M  V30 37 C -9.0932 13.5 0.0 0
M  V30 38 O -10.3923 11.25 0.0 0
M  V30 39 C -10.3923 6.75 0.0 0
M  V30 40 C -11.6913 10.5 0.0 0
M  V30 END ATOM
M  V30 BEGIN BOND
M  V30 1 2 1 2
M  V30 2 1 1 3
M  V30 3 1 1 4
M  V30 4 1 1 5
M  V30 5 1 3 6
M  V30 6 1 6 7
M  V30 7 1 7 8
M  V30 8 1 7 9
M  V30 9 2 8 10
M  V30 10 1 8 11
M  V30 11 2 9 12
M  V30 12 1 9 13
M  V30 13 1 10 14
M  V30 14 1 11 15
M  V30 15 2 11 16
M  V30 16 1 13 17
M  V30 17 1 13 18
M  V30 18 1 14 19
M  V30 19 2 14 20
M  V30 20 1 19 21
M  V30 21 2 21 22
M  V30 22 1 21 23
M  V30 23 1 22 24
M  V30 24 1 23 25
M  V30 25 2 23 26
M  V30 26 2 24 27
M  V30 27 1 24 28
M  V30 28 1 28 29
M  V30 29 2 29 30
M  V30 30 1 29 31
M  V30 31 1 30 32
M  V30 32 2 31 33
M  V30 33 1 32 34
M  V30 34 2 32 35
M  V30 35 1 33 36
M  V30 36 1 34 37
M  V30 37 1 35 38
M  V30 38 1 36 39
M  V30 39 1 38 40
M  V30 40 1 13 15
M  V30 41 1 16 20
M  V30 42 1 26 27
M  V30 43 1 33 35
M  V30 END BOND
M  V30 END CTAB
M  END
>  <ID>
CID11671467

>  <name>
fostamatinib

>  <smiles>
CC1(C(=O)N(c2c(O1)ccc(n2)Nc3nc(ncc3F)Nc4cc(c(c(c4)OC)OC)OC)COP(=O)(O)O)C

$$$$
CID163983
Actelion Java MolfileCreator 2.0

  0  0  0  0  0  0              0 V3000
M  V30 BEGIN CTAB
M  V30 COUNTS 37 41 0 0 0
M  V30 BEGIN ATOM
M  V30 1 F 5.0621 3.9999 0.0 0
M  V30 2 C 6.0621 4.0 0.0 0
M  V30 3 F 6.0621 5.0 0.0 0
M  V30 4 F 7.0621 4.0 0.0 0
M  V30 5 C 6.0621 3.0 0.0 0
M  V30 6 C 5.1961 2.5 0.0 0
M  V30 7 C 6.9282 2.5 0.0 0
M  V30 8 C 5.1961 1.5 0.0 0
M  V30 9 C 6.9282 1.5 0.0 0
M  V30 10 C 4.3301 1.0 0.0 0
M  V30 11 C 6.0621 1.0 0.0 0
M  V30 12 N 3.4641 1.5 0.0 0
M  V30 13 C 4.3301 0.0 0.0 0
M  V30 14 N 3.2561 2.4781 0.0 0
M  V30 15 C 2.598 1.0 0.0 0
M  V30 16 C 3.4641 -0.4999 0.0 0
M  V30 17 C 2.2616 2.5826 0.0 0
M  V30 18 N 2.598 0.0 0.0 0
M  V30 19 C 1.8549 1.6691 0.0 0
M  V30 20 C 1.732 -0.5 0.0 0
M  V30 21 C 0.8767 1.4612 0.0 0
M  V30 22 O 1.732 -1.5 0.0 0
M  V30 23 C 0.866 0.0 0.0 0
M  V30 24 N -0.1013 1.2533 0.0 0
M  V30 25 N 0.0 -0.5 0.0 0
M  V30 26 C -0.866 0.0 0.0 0
M  V30 27 C 0.0 -1.4999 0.0 0
M  V30 28 C -1.732 -0.4999 0.0 0
M  V30 29 C -0.866 -1.9999 0.0 0
M  V30 30 N -1.732 -1.4999 0.0 0
M  V30 31 C -2.598 -1.9999 0.0 0
M  V30 32 C -2.598 -2.9999 0.0 0
M  V30 33 C -3.4641 -3.4999 0.0 0
M  V30 34 C -1.732 -3.4999 0.0 0
M  V30 35 C -3.4641 -4.4999 0.0 0
M  V30 36 C -1.732 -4.4999 0.0 0
M  V30 37 C -2.598 -4.9999 0.0 0
M  V30 END ATOM
M  V30 BEGIN BOND
M  V30 1 1 1 2
M  V30 2 1 2 3
M  V30 3 1 2 4
M  V30 4 1 2 5
M  V30 5 2 5 6
M  V30 6 1 5 7
M  V30 7 1 6 8
M  V30 8 2 7 9
M  V30 9 1 8 10
M  V30 10 2 8 11
M  V30 11 1 10 12
M  V30 12 2 10 13
M  V30 13 1 12 14
M  V30 14 1 12 15
M  V30 15 1 13 16
M  V30 16 2 14 17
M  V30 17 1 15 18
M  V30 18 2 15 19
M  V30 19 1 18 20
M  V30 20 1 19 21
M  V30 21 2 20 22
M  V30 22 1 20 23
M  V30 23 3 21 24
M  V30 24 1 23 25
M  V30 25 1 25 26
M  V30 26 1 25 27
M  V30 27 1 26 28
M  V30 28 1 27 29
M  V30 29 1 28 30
M  V30 30 1 30 31
M  V30 31 1 31 32
M  V30 32 2 32 33
M  V30 33 1 32 34
M  V30 34 1 33 35
M  V30 35 2 34 36
M  V30 36 2 35 37
M  V30 37 1 9 11
M  V30 38 1 16 18
M  V30 39 1 17 19
M  V30 40 1 29 30
M  V30 41 1 36 37
M  V30 END BOND
M  V30 END CTAB
M  END
>  <ID>
CID163983

>  <name>
CL-275838

>  <smiles>
C1CN(CCN1Cc2ccccc2)CC(=O)N3CC=C(n4c3c(cn4)C#N)c5cc(ccc5)C(F)(F)F

$$$$
CID60854
Actelion Java MolfileCreator 2.0

  0  0  0  0  0  0              0 V3000
M  V30 BEGIN CTAB
M  V30 COUNTS 28 32 0 0 0
M  V30 BEGIN ATOM
M  V30 1 Cl 1.732 1.4999 0.0 0
M  V30 2 C 2.598 1.0 0.0 0
M  V30 3 C 2.598 0.0 0.0 0
M  V30 4 C 3.4641 1.4999 0.0 0
M  V30 5 C 3.4641 -0.4999 0.0 0
M  V30 6 C 1.732 -0.5 0.0 0
M  V30 7 C 4.3301 1.0 0.0 0
M  V30 8 C 4.3301 0.0 0.0 0
M  V30 9 C 0.866 0.0 0.0 0
M  V30 10 N 5.2811 1.309 0.0 0
M  V30 11 C 5.2811 -0.309 0.0 0
M  V30 12 N 0.0 -0.5 0.0 0
M  V30 13 C 5.8689 0.5 0.0 0
M  V30 14 C -0.866 0.0 0.0 0
M  V30 15 C 0.0 -1.4999 0.0 0
M  V30 16 O 6.8689 0.5 0.0 0
M  V30 17 C -1.732 -0.4999 0.0 0
M  V30 18 C -0.866 -1.9999 0.0 0
M  V30 19 N -1.732 -1.4999 0.0 0
M  V30 20 C -2.598 -1.9999 0.0 0
M  V30 21 N -3.5116 -1.5932 0.0 0
M  V30 22 C -2.7026 -2.9945 0.0 0
M  V30 23 S -4.1807 -2.3364 0.0 0
M  V30 24 C -3.6807 -3.2024 0.0 0
M  V30 25 C -2.0334 -3.7376 0.0 0
M  V30 26 C -3.9897 -4.1534 0.0 0
M  V30 27 C -2.3424 -4.6887 0.0 0
M  V30 28 C -3.3206 -4.8966 0.0 0
M  V30 END ATOM
M  V30 BEGIN BOND
M  V30 1 1 1 2
M  V30 2 2 2 3
M  V30 3 1 2 4
M  V30 4 1 3 5
M  V30 5 1 3 6
M  V30 6 2 4 7
M  V30 7 2 5 8
M  V30 8 1 6 9
M  V30 9 1 7 10
M  V30 10 1 8 11
M  V30 11 1 9 12
M  V30 12 1 10 13
M  V30 13 1 12 14
M  V30 14 1 12 15
M  V30 15 2 13 16
M  V30 16 1 14 17
M  V30 17 1 15 18
M  V30 18 1 17 19
M  V30 19 1 19 20
M  V30 20 2 20 21
M  V30 21 1 20 22
M  V30 22 1 21 23
M  V30 23 2 22 24
M  V30 24 1 22 25
M  V30 25 1 24 26
M  V30 26 2 25 27
M  V30 27 2 26 28
M  V30 28 1 7 8
M  V30 29 1 11 13
M  V30 30 1 18 19
M  V30 31 1 23 24
M  V30 32 1 27 28
M  V30 END BOND
M  V30 END CTAB
M  END
>  <ID>
CID60854

>  <name>
ziprasidone

>  <smiles>
C1CN(CCN1CCc2c(cc3c(c2)CC(=O)N3)Cl)c4nsc5ccccc45

$$$$
CID135403648
Actelion Java MolfileCreator 2.0

  0  0  0  0  0  0              0 V3000
M  V30 BEGIN CTAB
M  V30 COUNTS 34 36 0 0 0
M  V30 BEGIN ATOM
M  V30 1 O 12.9903 0.0 0.0 0
M  V30 2 C 12.9903 0.9999 0.0 0
M  V30 3 N 13.8564 1.4999 0.0 0
M  V30 4 C 12.1243 1.4999 0.0 0
M  V30 5 C 13.8564 2.4999 0.0 0
M  V30 6 N 11.2583 0.9999 0.0 0
M  V30 7 C 12.1243 2.4999 0.0 0
M  V30 8 N 12.9903 2.9999 0.0 0
M  V30 9 N 14.7224 2.9999 0.0 0
M  V30 10 C 11.2583 0.0 0.0 0
M  V30 11 C 10.3923 1.4999 0.0 0
M  V30 12 N 11.2583 2.9999 0.0 0
M  V30 13 O 12.1243 -0.5 0.0 0
M  V30 14 C 10.3923 2.4999 0.0 0
M  V30 15 C 9.5262 0.9999 0.0 0
M  V30 16 N 8.6602 1.4999 0.0 0
M  V30 17 C 7.7942 0.9999 0.0 0
M  V30 18 C 6.9282 1.4999 0.0 0
M  V30 19 C 7.7942 0.0 0.0 0
M  V30 20 C 6.0621 0.9999 0.0 0
M  V30 21 C 6.9282 -0.5 0.0 0
M  V30 22 C 6.0621 0.0 0.0 0
M  V30 23 C 5.1961 -0.5 0.0 0
M  V30 24 O 5.1961 -1.4999 0.0 0
M  V30 25 N 4.3301 0.0 0.0 0
M  V30 26 C 3.4641 -0.5 0.0 0 CFG=2
M  V30 27 C 3.4641 -1.5 0.0 0
M  V30 28 C 2.598 0.0 0.0 0
M  V30 29 O 2.598 -1.9999 0.0 0
M  V30 30 O 4.3301 -2.0 0.0 0
M  V30 31 C 1.732 -0.5 0.0 0
M  V30 32 C 0.866 0.0 0.0 0
M  V30 33 O 0.866 1.0 0.0 0
M  V30 34 O 0.0 -0.5 0.0 0
M  V30 END ATOM
M  V30 BEGIN BOND
M  V30 1 2 1 2
M  V30 2 1 2 3
M  V30 3 1 2 4
M  V30 4 1 3 5
M  V30 5 1 4 6
M  V30 6 2 4 7
M  V30 7 2 5 8
M  V30 8 1 5 9
M  V30 9 1 6 10
M  V30 10 1 6 11
M  V30 11 1 7 12
M  V30 12 2 10 13
M  V30 13 1 11 14
M  V30 14 1 11 15
M  V30 15 1 15 16
M  V30 16 1 16 17
M  V30 17 2 17 18
M  V30 18 1 17 19
M  V30 19 1 18 20
M  V30 20 2 19 21
M  V30 21 2 20 22
M  V30 22 1 22 23
M  V30 23 2 23 24
M  V30 24 1 23 25
M  V30 25 1 26 25 CFG=3
M  V30 26 1 26 27
M  V30 27 1 26 28
M  V30 28 2 27 29
M  V30 29 1 27 30
M  V30 30 1 28 31
M  V30 31 1 31 32
M  V30 32 2 32 33
M  V30 33 1 32 34
M  V30 34 1 7 8
M  V30 35 1 12 14
M  V30 36 1 21 22
M  V30 END BOND
M  V30 BEGIN COLLECTION
M  V30 MDLV30/STEABS ATOMS=(1 26)
M  V30 END COLLECTION
M  V30 END CTAB
M  END
>  <ID>
CID135403648

>  <name>
leucovorin

>  <smiles>
C1C(N(c2c(N1)nc([nH]c2=O)N)C=O)CNc3ccc(cc3)C(=O)N[C@@H](CCC(=O)O)C(=O)O

$$$$
CID56843466
Actelion Java MolfileCreator 2.0

  0  0  0  0  0  0              0 V3000
M  V30 BEGIN CTAB
M  V30 COUNTS 41 44 0 0 0
M  V30 BEGIN ATOM
M  V30 1 S 6.9282 -0.5 0.0 0
M  V30 2 O 6.4282 -1.366 0.0 0
M  V30 3 O 7.4282 0.366 0.0 0
M  V30 4 N 6.0621 0.0 0.0 0
M  V30 5 C 7.7942 -1.0 0.0 0
M  V30 6 C 5.1961 -0.5 0.0 0
M  V30 7 C 4.3301 0.0 0.0 0
M  V30 8 C 5.1961 -1.4999 0.0 0
M  V30 9 O 4.3301 1.0 0.0 0
M  V30 10 C 3.4641 -0.5 0.0 0
M  V30 11 C 4.3301 -1.9999 0.0 0
M  V30 12 C 3.4641 1.5 0.0 0
M  V30 13 N 2.598 0.0 0.0 0
M  V30 14 C 3.4641 -1.4999 0.0 0
M  V30 15 C 4.3301 -3.0 0.0 0
M  V30 16 C 1.732 -0.5 0.0 0
M  V30 17 C 5.3301 -3.0 0.0 0
M  V30 18 C 4.3301 -4.0 0.0 0
M  V30 19 C 3.3301 -3.0 0.0 0
M  V30 20 O 1.732 -1.5 0.0 0
M  V30 21 C 0.866 0.0 0.0 0
M  V30 22 O 0.866 1.0 0.0 0
M  V30 23 C 0.0 -0.5 0.0 0
M  V30 24 C -0.866 0.0 0.0 0
M  V30 25 C 0.0 -1.4999 0.0 0
M  V30 26 C -1.732 -0.4999 0.0 0
M  V30 27 C -0.866 1.0 0.0 0
M  V30 28 C -0.866 -1.9999 0.0 0
M  V30 29 C -1.732 -1.4999 0.0 0
M  V30 30 C -2.598 0.0 0.0 0
M  V30 31 C -1.732 1.5 0.0 0
M  V30 32 O -2.598 -1.9999 0.0 0
M  V30 33 C -2.598 1.0 0.0 0
M  V30 34 C -2.598 -2.9999 0.0 0
M  V30 35 C -3.4641 -3.4999 0.0 0
M  V30 36 N -3.4641 -4.4999 0.0 0
M  V30 37 C -4.3301 -4.9999 0.0 0
M  V30 38 C -2.598 -4.9999 0.0 0
M  V30 39 C -4.3301 -5.9999 0.0 0
M  V30 40 C -2.598 -5.9999 0.0 0
M  V30 41 O -3.4641 -6.4999 0.0 0
M  V30 END ATOM
M  V30 BEGIN BOND
M  V30 1 2 1 2
M  V30 2 2 1 3
M  V30 3 1 1 4
M  V30 4 1 1 5
M  V30 5 1 4 6
M  V30 6 2 6 7
M  V30 7 1 6 8
M  V30 8 1 7 9
M  V30 9 1 7 10
M  V30 10 2 8 11
M  V30 11 1 9 12
M  V30 12 1 10 13
M  V30 13 2 10 14
M  V30 14 1 11 15
M  V30 15 1 13 16
M  V30 16 1 15 17
M  V30 17 1 15 18
M  V30 18 1 15 19
M  V30 19 2 16 20
M  V30 20 1 16 21
M  V30 21 2 21 22
M  V30 22 1 21 23
M  V30 23 1 23 24
M  V30 24 2 23 25
M  V30 25 1 24 26
M  V30 26 2 24 27
M  V30 27 1 25 28
M  V30 28 1 26 29
M  V30 29 2 26 30
M  V30 30 1 27 31
M  V30 31 1 29 32
M  V30 32 1 30 33
M  V30 33 1 32 34
M  V30 34 1 34 35
M  V30 35 1 35 36
M  V30 36 1 36 37
M  V30 37 1 36 38
M  V30 38 1 37 39
M  V30 39 1 38 40
M  V30 40 1 39 41
M  V30 41 1 11 14
M  V30 42 2 28 29
M  V30 43 2 31 33
M  V30 44 1 40 41
M  V30 END BOND
M  V30 END CTAB
M  END
>  <ID>
CID56843466

>  <name>
ITX5061

>  <smiles>
CC(C)(C)c1cc(c(c(c1)NS(=O)(=O)C)OC)NC(=O)C(=O)c2ccc(c3ccccc23)OCCN4CCOCC4

$$$$
CID452548
Actelion Java MolfileCreator 2.0

  0  0  0  0  0  0              0 V3000
M  V30 BEGIN CTAB
M  V30 COUNTS 46 53 0 0 0
M  V30 BEGIN ATOM
M  V30 1 S 6.1096 -3.0932 0.0 0
M  V30 2 C 5.1961 -3.5 0.0 0
M  V30 3 C 6.7788 -3.8364 0.0 0
M  V30 4 C 5.3006 -4.4945 0.0 0
M  V30 5 C 4.3301 -3.0 0.0 0 CFG=1
M  V30 6 C 6.2788 -4.7024 0.0 0
M  V30 7 O 4.3301 -1.9999 0.0 0
M  V30 8 O 3.4641 -3.5 0.0 0
M  V30 9 C 3.4641 -1.4999 0.0 0 CFG=1
M  V30 10 C 2.598 -2.9999 0.0 0
M  V30 11 C 3.4641 -0.5 0.0 0 CFG=2
M  V30 12 C 2.598 -1.9999 0.0 0 CFG=1
M  V30 13 O 4.3301 0.0 0.0 0
M  V30 14 C 2.598 0.0 0.0 0 CFG=1
M  V30 15 O 1.732 -1.4999 0.0 0
M  V30 16 O 2.598 1.0 0.0 0
M  V30 17 C 1.732 -0.5 0.0 0 CFG=1
M  V30 18 O 0.866 0.0 0.0 0
M  V30 19 C 0.0 -0.5 0.0 0 CFG=2
M  V30 20 C -0.866 0.0 0.0 0
M  V30 21 C 0.0 -1.4999 0.0 0 CFG=2
M  V30 22 C -1.732 -0.4999 0.0 0
M  V30 23 C -0.866 0.9999 0.0 0
M  V30 24 C -0.866 -1.9999 0.0 0 CFG=1
M  V30 25 C 0.7431 -2.1691 0.0 0
M  V30 26 C -2.598 0.0 0.0 0
M  V30 27 C -1.732 -1.4999 0.0 0 CFG=2
M  V30 28 C -1.732 1.5 0.0 0
M  V30 29 C -0.6581 -2.9781 0.0 0
M  V30 30 O 0.3364 -3.0826 0.0 0
M  V30 31 C -2.598 1.0 0.0 0
M  V30 32 C -2.598 -1.9999 0.0 0
M  V30 33 O -1.9399 2.4781 0.0 0
M  V30 34 O -1.3272 -3.7212 0.0 0
M  V30 35 O -3.3412 1.6691 0.0 0
M  V30 36 C -3.4641 -1.4999 0.0 0
M  V30 37 C -2.598 -2.9999 0.0 0
M  V30 38 C -2.9344 2.5826 0.0 0
M  V30 39 C -4.3301 -1.9999 0.0 0
M  V30 40 C -3.4641 -3.4999 0.0 0
M  V30 41 O -5.1961 -1.4999 0.0 0
M  V30 42 C -4.3301 -2.9999 0.0 0
M  V30 43 O -3.4641 -4.4999 0.0 0
M  V30 44 C -6.0621 -1.9999 0.0 0
M  V30 45 O -5.1961 -3.4999 0.0 0
M  V30 46 C -2.598 -5.0 0.0 0
M  V30 END ATOM
M  V30 BEGIN BOND
M  V30 1 1 1 2
M  V30 2 1 1 3
M  V30 3 2 2 4
M  V30 4 1 5 2 CFG=3
M  V30 5 2 3 6
M  V30 6 1 5 7
M  V30 7 1 5 8
M  V30 8 1 9 7 CFG=3
M  V30 9 1 8 10
M  V30 10 1 11 9
M  V30 11 1 12 9
M  V30 12 1 11 13 CFG=1
M  V30 13 1 14 11
M  V30 14 1 12 15 CFG=1
M  V30 15 1 14 16 CFG=3
M  V30 16 1 17 14
M  V30 17 1 17 18 CFG=1
M  V30 18 1 19 18 CFG=1
M  V30 19 1 19 20
M  V30 20 1 21 19
M  V30 21 2 20 22
M  V30 22 1 20 23
M  V30 23 1 24 21
M  V30 24 1 21 25 CFG=1
M  V30 25 1 22 26
M  V30 26 1 27 22
M  V30 27 2 23 28
M  V30 28 1 24 29 CFG=3
M  V30 29 1 25 30
M  V30 30 2 26 31
M  V30 31 1 27 32 CFG=3
M  V30 32 1 28 33
M  V30 33 2 29 34
M  V30 34 1 31 35
M  V30 35 2 32 36
M  V30 36 1 32 37
M  V30 37 1 33 38
M  V30 38 1 36 39
M  V30 39 2 37 40
M  V30 40 1 39 41
M  V30 41 2 39 42
M  V30 42 1 40 43
M  V30 43 1 41 44
M  V30 44 1 42 45
M  V30 45 1 43 46
M  V30 46 1 4 6
M  V30 47 1 10 12
M  V30 48 1 15 17
M  V30 49 1 24 27
M  V30 50 1 28 31
M  V30 51 1 29 30
M  V30 52 1 35 38
M  V30 53 1 40 42
M  V30 END BOND
M  V30 BEGIN COLLECTION
M  V30 MDLV30/STEABS ATOMS=(10 5 9 11 12 14 17 19 21 24 27)
M  V30 END COLLECTION
M  V30 END CTAB
M  END
>  <ID>
CID452548

>  <name>
teniposide

>  <smiles>
COc1cc(cc(c1O)OC)[C@H]2[C@@H]3[C@H](COC3=O)[C@@H](c4cc5c(cc24)OCO5)O[C@H]6[C@@H]([C@H]([C@H]7[C@H](O6)CO[C@H](O7)c8cccs8)O)O

$$$$
CID36462
Actelion Java MolfileCreator 2.0

  0  0  0  0  0  0              0 V3000
M  V30 BEGIN CTAB
M  V30 COUNTS 42 48 0 0 0
M  V30 BEGIN ATOM
M  V30 1 O 7.778 -0.0581 0.0 0
M  V30 2 C 6.3108 0.2536 0.0 0
M  V30 3 O 5.7007 1.624 0.0 0
M  V30 4 C 5.1961 -0.7499 0.0 0 CFG=2
M  V30 5 C 4.2089 1.4672 0.0 0
M  V30 6 C 5.1961 -2.25 0.0 0 CFG=1
M  V30 7 C 3.8971 0.0 0.0 0 CFG=2
M  V30 8 C 3.8971 -3.0 0.0 0
M  V30 9 C 6.4951 -2.9999 0.0 0
M  V30 10 C 2.598 -0.75 0.0 0 CFG=1
M  V30 11 C 2.598 -2.25 0.0 0
M  V30 12 C 3.8971 -4.4999 0.0 0
M  V30 13 C 6.4951 -4.4999 0.0 0
M  V30 14 C 7.7942 -2.2499 0.0 0
M  V30 15 O 1.299 0.0 0.0 0
M  V30 16 C 1.299 -2.9999 0.0 0
M  V30 17 C 2.598 -5.25 0.0 0
M  V30 18 C 7.7942 -5.2499 0.0 0
M  V30 19 C 9.0932 -2.9999 0.0 0
M  V30 20 C 1.299 1.4999 0.0 0 CFG=2
M  V30 21 C 1.299 -4.5 0.0 0
M  V30 22 O 2.2862 -6.7172 0.0 0
M  V30 23 O 7.7942 -6.7499 0.0 0
M  V30 24 C 9.0932 -4.4999 0.0 0
M  V30 25 O 10.3923 -2.2499 0.0 0
M  V30 26 O 2.598 2.2499 0.0 0
M  V30 27 C 0.0 2.25 0.0 0 CFG=2
M  V30 28 O 0.1843 -5.5036 0.0 0
M  V30 29 C 0.7944 -6.874 0.0 0
M  V30 30 C 9.0932 -7.4999 0.0 0
M  V30 31 O 10.3923 -5.2499 0.0 0
M  V30 32 C 10.3923 -0.7499 0.0 0
M  V30 33 C 2.598 3.75 0.0 0 CFG=1
M  V30 34 O -1.299 1.5 0.0 0
M  V30 35 C 0.0 3.75 0.0 0 CFG=2
M  V30 36 C 1.299 4.5 0.0 0 CFG=2
M  V30 37 C 3.8971 4.4999 0.0 0
M  V30 38 O -1.299 4.5 0.0 0
M  V30 39 O 1.299 6.0 0.0 0
M  V30 40 O 3.8971 6.0 0.0 0
M  V30 41 C 2.598 6.7499 0.0 0 CFG=1
M  V30 42 C 2.598 8.25 0.0 0
M  V30 END ATOM
M  V30 BEGIN BOND
M  V30 1 2 1 2
M  V30 2 1 2 3
M  V30 3 1 4 2 CFG=3
M  V30 4 1 3 5
M  V30 5 1 6 4
M  V30 6 1 7 4
M  V30 7 1 6 8
M  V30 8 1 6 9 CFG=3
M  V30 9 1 10 7
M  V30 10 2 8 11
M  V30 11 1 8 12
M  V30 12 2 9 13
M  V30 13 1 9 14
M  V30 14 1 10 15 CFG=1
M  V30 15 1 11 16
M  V30 16 2 12 17
M  V30 17 1 13 18
M  V30 18 2 14 19
M  V30 19 1 20 15 CFG=1
M  V30 20 2 16 21
M  V30 21 1 17 22
M  V30 22 1 18 23
M  V30 23 2 18 24
M  V30 24 1 19 25
M  V30 25 1 20 26
M  V30 26 1 27 20
M  V30 27 1 21 28
M  V30 28 1 22 29
M  V30 29 1 23 30
M  V30 30 1 24 31
M  V30 31 1 25 32
M  V30 32 1 33 26 CFG=1
M  V30 33 1 27 34 CFG=3
M  V30 34 1 35 27
M  V30 35 1 36 33
M  V30 36 1 33 37
M  V30 37 1 35 38 CFG=1
M  V30 38 1 36 39 CFG=3
M  V30 39 1 37 40
M  V30 40 1 41 39
M  V30 41 1 41 42 CFG=3
M  V30 42 1 7 5 CFG=1
M  V30 43 1 10 11
M  V30 44 1 17 21
M  V30 45 1 19 24
M  V30 46 1 28 29
M  V30 47 1 35 36
M  V30 48 1 40 41
M  V30 END BOND
M  V30 BEGIN COLLECTION
M  V30 MDLV30/STEABS ATOMS=(10 4 6 7 10 20 27 33 35 36 41)
M  V30 END COLLECTION
M  V30 END CTAB
M  END
>  <ID>
CID36462

>  <name>
etoposide

>  <smiles>
C[C@@H]1OC[C@@H]2[C@@H](O1)[C@@H]([C@H]([C@@H](O2)O[C@H]3[C@H]4COC(=O)[C@@H]4[C@@H](c5cc6c(cc35)OCO6)c7cc(c(c(c7)OC)O)OC)O)O

$$$$
CID9852175
Actelion Java MolfileCreator 2.0

  0  0  0  0  0  0              0 V3000
M  V30 BEGIN CTAB
M  V30 COUNTS 44 48 0 0 0
M  V30 BEGIN ATOM
M  V30 1 F 6.4951 6.0 0.0 0
M  V30 2 C 6.4951 4.5 0.0 0
M  V30 3 C 7.7942 3.75 0.0 0
M  V30 4 C 5.1961 3.75 0.0 0
M  V30 5 C 7.7942 2.2499 0.0 0
M  V30 6 C 5.1961 2.25 0.0 0
M  V30 7 C 6.4951 1.5 0.0 0
M  V30 8 C 9.0932 1.4999 0.0 0
M  V30 9 C 6.4951 0.0 0.0 0 CFG=2
M  V30 10 N 5.1961 -0.75 0.0 0
M  V30 11 C 7.7942 -0.75 0.0 0
M  V30 12 C 3.8971 0.0 0.0 0
M  V30 13 C 5.1961 -2.25 0.0 0
M  V30 14 C 7.7942 -2.25 0.0 0 CFG=2
M  V30 15 O 3.8971 1.5 0.0 0
M  V30 16 N 2.598 -0.75 0.0 0
M  V30 17 C 6.4951 -3.0 0.0 0
M  V30 18 N 9.0932 -3.0 0.0 0
M  V30 19 C 1.299 0.0 0.0 0 CFG=1
M  V30 20 C 2.598 -2.2499 0.0 0
M  V30 21 C 10.3923 -2.25 0.0 0
M  V30 22 C 9.0932 -4.5 0.0 0
M  V30 23 C 0.0 -0.7499 0.0 0
M  V30 24 C 1.299 1.5 0.0 0
M  V30 25 C 11.6913 -3.0 0.0 0 CFG=1
M  V30 26 C 10.3923 -5.25 0.0 0
M  V30 27 C 0.0 -2.2499 0.0 0
M  V30 28 C -1.299 0.0 0.0 0
M  V30 29 N 11.6913 -4.5 0.0 0
M  V30 30 C 13.1179 -2.5364 0.0 0
M  V30 31 C -1.299 -2.9999 0.0 0
M  V30 32 C -2.598 -0.7499 0.0 0
M  V30 33 C 13.1179 -4.9635 0.0 0
M  V30 34 C 13.9996 -3.75 0.0 0
M  V30 35 C -2.598 -2.2499 0.0 0
M  V30 36 C -1.299 -4.4999 0.0 0
M  V30 37 C -3.8971 0.0 0.0 0
M  V30 38 O 13.5814 -6.3901 0.0 0
M  V30 39 F -2.799 -4.4999 0.0 0
M  V30 40 F -1.299 -5.9999 0.0 0
M  V30 41 F 0.2009 -4.4999 0.0 0
M  V30 42 F -3.1471 1.299 0.0 0
M  V30 43 F -5.1961 0.75 0.0 0
M  V30 44 F -4.6471 -1.299 0.0 0
M  V30 END ATOM
M  V30 BEGIN BOND
M  V30 1 1 1 2
M  V30 2 2 2 3
M  V30 3 1 2 4
M  V30 4 1 3 5
M  V30 5 2 4 6
M  V30 6 2 5 7
M  V30 7 1 5 8
M  V30 8 1 9 7 CFG=1
M  V30 9 1 9 10
M  V30 10 1 9 11
M  V30 11 1 10 12
M  V30 12 1 10 13
M  V30 13 1 14 11
M  V30 14 2 12 15
M  V30 15 1 12 16
M  V30 16 1 13 17
M  V30 17 1 14 18 CFG=1
M  V30 18 1 19 16 CFG=1
M  V30 19 1 16 20
M  V30 20 1 18 21
M  V30 21 1 18 22
M  V30 22 1 19 23
M  V30 23 1 19 24
M  V30 24 1 25 21
M  V30 25 1 22 26
M  V30 26 2 23 27
M  V30 27 1 23 28
M  V30 28 1 25 29 CFG=3
M  V30 29 1 25 30
M  V30 30 1 27 31
M  V30 31 2 28 32
M  V30 32 1 29 33
M  V30 33 1 30 34
M  V30 34 2 31 35
M  V30 35 1 31 36
M  V30 36 1 32 37
M  V30 37 2 33 38
M  V30 38 1 36 39
M  V30 39 1 36 40
M  V30 40 1 36 41
M  V30 41 1 37 42
M  V30 42 1 37 43
M  V30 43 1 37 44
M  V30 44 1 6 7
M  V30 45 1 14 17
M  V30 46 1 26 29
M  V30 47 1 32 35
M  V30 48 1 33 34
M  V30 END BOND
M  V30 BEGIN COLLECTION
M  V30 MDLV30/STEABS ATOMS=(4 9 14 19 25)
M  V30 END COLLECTION
M  V30 END CTAB
M  END
>  <ID>
CID9852175

>  <name>
orvepitant

>  <smiles>
Cc1c(ccc(c1)F)[C@H]2C[C@H](CCN2C(=O)N(C)[C@H](C)c3cc(cc(c3)C(F)(F)F)C(F)(F)F)N4CCN5[C@H](C4)CCC5=O

$$$$
CID107715
Actelion Java MolfileCreator 2.0

  0  0  0  0  0  0              0 V3000
M  V30 BEGIN CTAB
M  V30 COUNTS 45 52 0 0 0
M  V30 BEGIN ATOM
M  V30 1 O -4.0826 -1.7024 0.0 0
M  V30 2 C -3.0826 -1.7024 0.0 0
M  V30 3 N -2.5826 -2.5684 0.0 0
M  V30 4 C -2.5826 -0.8364 0.0 0 CFG=1
M  V30 5 C -1.5826 -2.5684 0.0 0 CFG=2
M  V30 6 C -2.8916 -3.5195 0.0 0
M  V30 7 N -1.5826 -0.8364 0.0 0
M  V30 8 C -3.0826 0.0296 0.0 0
M  V30 9 C -1.0826 -1.7024 0.0 0 CFG=1
M  V30 10 C -1.2736 -3.5195 0.0 0
M  V30 11 C -2.0826 -4.1073 0.0 0
M  V30 12 C -0.9135 -0.0932 0.0 0
M  V30 13 C -4.0826 0.0296 0.0 0
M  V30 14 O -0.1045 -1.4945 0.0 0
M  V30 15 O -0.4948 -2.5114 0.0 0
M  V30 16 O -1.1214 0.8848 0.0 0
M  V30 17 C 0.0 -0.5 0.0 0 CFG=1
M  V30 18 C -4.5826 0.8956 0.0 0
M  V30 19 C -4.5826 -0.8364 0.0 0
M  V30 20 N 0.866 0.0 0.0 0
M  V30 21 C 0.8386 -1.0446 0.0 0
M  V30 22 C -5.5826 0.8956 0.0 0
M  V30 23 C -5.5826 -0.8364 0.0 0
M  V30 24 C 0.866 1.0 0.0 0
M  V30 25 C 0.7863 -2.0432 0.0 0
M  V30 26 C 1.7296 -0.5906 0.0 0
M  V30 27 C -6.0826 0.0296 0.0 0
M  V30 28 O 0.0 1.5 0.0 0
M  V30 29 C 1.732 1.4999 0.0 0 CFG=1
M  V30 30 C 2.598 1.0 0.0 0
M  V30 31 C 1.732 2.5 0.0 0
M  V30 32 N 3.4641 1.4999 0.0 0
M  V30 33 C 2.598 3.0 0.0 0 CFG=1
M  V30 34 C 3.4641 2.5 0.0 0 CFG=1
M  V30 35 C 4.3301 1.0 0.0 0
M  V30 36 C 2.598 4.0 0.0 0
M  V30 37 C 4.3301 3.0 0.0 0
M  V30 38 C 3.4641 4.5 0.0 0
M  V30 39 C 1.7918 4.6445 0.0 0
M  V30 40 C 4.3301 4.0 0.0 0
M  V30 41 C 3.672 5.4781 0.0 0
M  V30 42 C 1.8963 5.639 0.0 0
M  V30 43 C 5.0732 4.6691 0.0 0
M  V30 44 N 4.6665 5.5826 0.0 0
M  V30 45 C 2.8099 6.0457 0.0 0
M  V30 END ATOM
M  V30 BEGIN BOND
M  V30 1 2 1 2
M  V30 2 1 2 3
M  V30 3 1 4 2
M  V30 4 1 5 3 CFG=3
M  V30 5 1 3 6
M  V30 6 1 4 7
M  V30 7 1 4 8 CFG=3
M  V30 8 1 9 5
M  V30 9 1 5 10
M  V30 10 1 6 11
M  V30 11 1 7 12
M  V30 12 1 8 13
M  V30 13 1 9 14
M  V30 14 1 9 15 CFG=3
M  V30 15 2 12 16
M  V30 16 1 17 12
M  V30 17 2 13 18
M  V30 18 1 13 19
M  V30 19 1 17 20 CFG=3
M  V30 20 1 17 21
M  V30 21 1 18 22
M  V30 22 2 19 23
M  V30 23 1 20 24
M  V30 24 1 21 25
M  V30 25 1 21 26
M  V30 26 2 22 27
M  V30 27 2 24 28
M  V30 28 1 29 24 CFG=3
M  V30 29 1 29 30
M  V30 30 1 29 31
M  V30 31 1 30 32
M  V30 32 1 33 31 CFG=3
M  V30 33 1 34 32 CFG=1
M  V30 34 1 32 35
M  V30 35 1 33 36
M  V30 36 1 34 37
M  V30 37 2 36 38
M  V30 38 1 36 39
M  V30 39 1 37 40
M  V30 40 1 38 41
M  V30 41 2 39 42
M  V30 42 2 40 43
M  V30 43 1 41 44
M  V30 44 2 41 45
M  V30 45 1 7 9
M  V30 46 1 10 11
M  V30 47 1 14 17
M  V30 48 1 23 27
M  V30 49 1 33 34
M  V30 50 1 38 40
M  V30 51 1 42 45
M  V30 52 1 43 44
M  V30 END BOND
M  V30 BEGIN COLLECTION
M  V30 MDLV30/STEABS ATOMS=(7 4 5 9 17 29 33 34)
M  V30 END COLLECTION
M  V30 END CTAB
M  END
>  <ID>
CID107715

>  <name>
dihydroergocristine

>  <smiles>
CC(C)[C@@]1(C(=O)N2[C@H](C(=O)N3CCC[C@H]3[C@@]2(O1)O)Cc4ccccc4)NC(=O)[C@@H]5C[C@H]6[C@@H](Cc7c[nH]c8cccc6c78)N(C5)C

$$$$
CID46215462
Actelion Java MolfileCreator 2.0

  0  0  0  0  0  0              0 V3000
M  V30 BEGIN CTAB
M  V30 COUNTS 38 44 0 0 0
M  V30 BEGIN ATOM
M  V30 1 N 5.7105 0.2861 0.0 0
M  V30 2 N 4.7159 0.1816 0.0 0
M  V30 3 C 6.2982 -0.5228 0.0 0
M  V30 4 C 4.3092 -0.7318 0.0 0
M  V30 5 C 7.2661 -0.2712 0.0 0
M  V30 6 C 5.8915 -1.4363 0.0 0
M  V30 7 N 3.3147 -0.8364 0.0 0
M  V30 8 C 4.897 -1.5408 0.0 0
M  V30 9 C 8.0662 -0.871 0.0 0
M  V30 10 C 7.3855 0.7216 0.0 0
M  V30 11 C 6.3521 -2.3239 0.0 0
M  V30 12 N 2.6455 -0.0932 0.0 0
M  V30 13 C 2.8147 -1.7024 0.0 0
M  V30 14 C 8.9857 -0.478 0.0 0
M  V30 15 C 8.0961 -1.8706 0.0 0
M  V30 16 C 8.305 1.1146 0.0 0
M  V30 17 C 7.3333 -2.5172 0.0 0
M  V30 18 C 1.732 -0.5 0.0 0
M  V30 19 N 1.8365 -1.4945 0.0 0
M  V30 20 N 3.2214 -2.6159 0.0 0
M  V30 21 C 9.1051 0.5148 0.0 0
M  V30 22 N 0.866 0.0 0.0 0
M  V30 23 C 0.0 -0.5 0.0 0
M  V30 24 C -0.866 0.0 0.0 0
M  V30 25 C 0.0 -1.4999 0.0 0
M  V30 26 C -1.732 -0.4999 0.0 0
M  V30 27 C -0.866 -1.9999 0.0 0
M  V30 28 C -1.732 -1.4999 0.0 0
M  V30 29 C -2.5138 0.1234 0.0 0
M  V30 30 C -2.5138 -2.1234 0.0 0
M  V30 31 C -3.4888 -0.099 0.0 0
M  V30 32 C -3.4888 -1.9009 0.0 0
M  V30 33 C -3.9226 -0.9999 0.0 0 CFG=2
M  V30 34 N -4.9226 -0.9999 0.0 0
M  V30 35 C -5.5104 -0.1909 0.0 0
M  V30 36 C -5.5104 -1.809 0.0 0
M  V30 37 C -6.4615 -0.4999 0.0 0
M  V30 38 C -6.4615 -1.4999 0.0 0
M  V30 END ATOM
M  V30 BEGIN BOND
M  V30 1 2 1 2
M  V30 2 1 1 3
M  V30 3 1 2 4
M  V30 4 1 3 5
M  V30 5 2 3 6
M  V30 6 1 4 7
M  V30 7 2 4 8
M  V30 8 2 5 9
M  V30 9 1 5 10
M  V30 10 1 6 11
M  V30 11 1 7 12
M  V30 12 1 7 13
M  V30 13 1 9 14
M  V30 14 1 9 15
M  V30 15 2 10 16
M  V30 16 1 11 17
M  V30 17 2 12 18
M  V30 18 2 13 19
M  V30 19 1 13 20
M  V30 20 2 14 21
M  V30 21 1 18 22
M  V30 22 1 22 23
M  V30 23 2 23 24
M  V30 24 1 23 25
M  V30 25 1 24 26
M  V30 26 2 25 27
M  V30 27 2 26 28
M  V30 28 1 26 29
M  V30 29 1 28 30
M  V30 30 1 29 31
M  V30 31 1 30 32
M  V30 32 1 33 31
M  V30 33 1 33 34 CFG=3
M  V30 34 1 34 35
M  V30 35 1 34 36
M  V30 36 1 35 37
M  V30 37 1 36 38
M  V30 38 1 6 8
M  V30 39 1 15 17
M  V30 40 1 16 21
M  V30 41 1 18 19
M  V30 42 1 27 28
M  V30 43 1 32 33
M  V30 44 1 37 38
M  V30 END BOND
M  V30 BEGIN COLLECTION
M  V30 MDLV30/STERAC1 ATOMS=(1 33)
M  V30 END COLLECTION
M  V30 END CTAB
M  END
>  <ID>
CID46215462

>  <name>
bemcentinib

>  <smiles>
C1CCN(C1)C2CCc3c(CC2)cc(cc3)Nc4nn(c(n4)N)-c5nnc-6c(c5)CCCc7ccccc67

$$$$
CID25019940
Actelion Java MolfileCreator 2.0

  0  0  0  0  0  0              0 V3000
M  V30 BEGIN CTAB
M  V30 COUNTS 41 47 0 0 0
M  V30 BEGIN ATOM
M  V30 1 F 6.0621 3.0 0.0 0
M  V30 2 C 5.1961 2.5 0.0 0
M  V30 3 C 4.3301 3.0 0.0 0
M  V30 4 C 5.1961 1.5 0.0 0
M  V30 5 C 3.4641 2.4999 0.0 0
M  V30 6 C 4.3301 1.0 0.0 0
M  V30 7 F 2.598 2.9999 0.0 0
M  V30 8 C 3.4641 1.4999 0.0 0
M  V30 9 C 4.3301 0.0 0.0 0 CFG=1
M  V30 10 N 3.4641 -0.5 0.0 0
M  V30 11 C 5.1961 -0.4999 0.0 0
M  V30 12 C 3.4641 -1.5 0.0 0
M  V30 13 C 2.598 0.0 0.0 0
M  V30 14 N 5.1961 -1.4999 0.0 0
M  V30 15 O 2.598 -2.0 0.0 0
M  V30 16 C 4.3301 -1.9999 0.0 0
M  V30 17 C 1.732 -0.5 0.0 0
M  V30 18 C 3.5211 -2.5877 0.0 0
M  V30 19 C 5.1391 -2.5877 0.0 0
M  V30 20 O 1.732 -1.5 0.0 0
M  V30 21 N 0.866 0.0 0.0 0
M  V30 22 C 3.8301 -3.5388 0.0 0
M  V30 23 C 4.8301 -3.5388 0.0 0
M  V30 24 C 0.0 -0.5 0.0 0
M  V30 25 C 0.0 -1.4999 0.0 0
M  V30 26 C -0.866 0.0 0.0 0
M  V30 27 C -0.866 -1.9999 0.0 0
M  V30 28 C -1.732 -0.4999 0.0 0
M  V30 29 C -1.732 -1.4999 0.0 0
M  V30 30 C -1.0739 -2.9781 0.0 0
M  V30 31 C -2.4751 -2.1691 0.0 0
M  V30 32 C -2.0684 -3.0826 0.0 0 CFG=1
M  V30 33 C -3.0629 -3.1872 0.0 0
M  V30 34 C -1.6617 -3.9962 0.0 0
M  V30 35 O -3.7321 -2.444 0.0 0
M  V30 36 N -3.2708 -4.1653 0.0 0
M  V30 37 C -2.4048 -4.6653 0.0 0
M  V30 38 C -0.7106 -4.3052 0.0 0
M  V30 39 N -2.1969 -5.6434 0.0 0
M  V30 40 C -0.5027 -5.2833 0.0 0
M  V30 41 C -1.2458 -5.9525 0.0 0
M  V30 END ATOM
M  V30 BEGIN BOND
M  V30 1 1 1 2
M  V30 2 2 2 3
M  V30 3 1 2 4
M  V30 4 1 3 5
M  V30 5 2 4 6
M  V30 6 1 5 7
M  V30 7 2 5 8
M  V30 8 1 9 6 CFG=3
M  V30 9 1 9 10
M  V30 10 1 9 11
M  V30 11 1 10 12
M  V30 12 1 10 13
M  V30 13 1 11 14
M  V30 14 2 12 15
M  V30 15 1 12 16
M  V30 16 1 13 17
M  V30 17 1 16 18
M  V30 18 1 16 19
M  V30 19 2 17 20
M  V30 20 1 17 21
M  V30 21 1 18 22
M  V30 22 1 19 23
M  V30 23 1 21 24
M  V30 24 2 24 25
M  V30 25 1 24 26
M  V30 26 1 25 27
M  V30 27 2 26 28
M  V30 28 2 27 29
M  V30 29 1 27 30
M  V30 30 1 29 31
M  V30 31 1 32 30 CFG=3
M  V30 32 1 32 33
M  V30 33 1 32 34
M  V30 34 2 33 35
M  V30 35 1 33 36
M  V30 36 2 34 37
M  V30 37 1 34 38
M  V30 38 1 37 39
M  V30 39 2 38 40
M  V30 40 2 39 41
M  V30 41 1 6 8
M  V30 42 1 14 16
M  V30 43 1 22 23
M  V30 44 1 28 29
M  V30 45 1 31 32
M  V30 46 1 36 37
M  V30 47 1 40 41
M  V30 END BOND
M  V30 BEGIN COLLECTION
M  V30 MDLV30/STEABS ATOMS=(2 9 32)
M  V30 END COLLECTION
M  V30 END CTAB
M  END
>  <ID>
CID25019940

>  <name>
MK-3207

>  <smiles>
C1CCC2(C1)C(=O)N([C@@H](CN2)c3cc(cc(c3)F)F)CC(=O)Nc4cc5c(C[C@@]6(C5)c7c(NC6=O)nccc7)cc4

$$$$
CID110635
Actelion Java MolfileCreator 2.0

  0  0  0  0  0  0              0 V3000
M  V30 BEGIN CTAB
M  V30 COUNTS 29 34 0 0 0
M  V30 BEGIN ATOM
M  V30 1 O 0.866 0.0 0.0 0
M  V30 2 C 0.0 -0.5 0.0 0
M  V30 3 N -0.866 0.0 0.0 0
M  V30 4 C 0.0 -1.4999 0.0 0 CFG=2
M  V30 5 C -1.732 -0.4999 0.0 0
M  V30 6 C -0.866 1.0 0.0 0
M  V30 7 N -0.866 -1.9999 0.0 0
M  V30 8 C 0.866 -1.9999 0.0 0
M  V30 9 C -1.732 -1.4999 0.0 0
M  V30 10 C -0.866 -2.9999 0.0 0 CFG=2
M  V30 11 C 0.866 -3.0 0.0 0
M  V30 12 O -2.598 -1.9999 0.0 0
M  V30 13 C -1.732 -3.4999 0.0 0
M  V30 14 C 0.0 -3.4999 0.0 0
M  V30 15 C 1.6091 -3.6691 0.0 0
M  V30 16 C -2.598 -2.9999 0.0 0
M  V30 17 C -1.732 -4.4999 0.0 0
M  V30 18 N 0.2079 -4.4781 0.0 0
M  V30 19 C 1.2024 -4.5826 0.0 0
M  V30 20 C 2.6036 -3.5646 0.0 0
M  V30 21 C -3.4641 -3.4999 0.0 0
M  V30 22 C -2.598 -4.9999 0.0 0
M  V30 23 C 1.7902 -5.3916 0.0 0
M  V30 24 C 3.1914 -4.3736 0.0 0
M  V30 25 O -4.4151 -3.1909 0.0 0
M  V30 26 C -3.4641 -4.4999 0.0 0
M  V30 27 C 2.7847 -5.2871 0.0 0
M  V30 28 C -5.0029 -3.9999 0.0 0
M  V30 29 O -4.4151 -4.809 0.0 0
M  V30 END ATOM
M  V30 BEGIN BOND
M  V30 1 2 1 2
M  V30 2 1 2 3
M  V30 3 1 4 2
M  V30 4 1 3 5
M  V30 5 1 3 6
M  V30 6 1 4 7 CFG=1
M  V30 7 1 4 8
M  V30 8 1 5 9
M  V30 9 1 10 7
M  V30 10 1 8 11
M  V30 11 2 9 12
M  V30 12 1 10 13 CFG=1
M  V30 13 1 10 14
M  V30 14 1 11 15
M  V30 15 2 13 16
M  V30 16 1 13 17
M  V30 17 1 14 18
M  V30 18 2 15 19
M  V30 19 1 15 20
M  V30 20 1 16 21
M  V30 21 2 17 22
M  V30 22 1 19 23
M  V30 23 2 20 24
M  V30 24 1 21 25
M  V30 25 2 21 26
M  V30 26 2 23 27
M  V30 27 1 25 28
M  V30 28 1 26 29
M  V30 29 1 7 9
M  V30 30 2 11 14
M  V30 31 1 18 19
M  V30 32 1 22 26
M  V30 33 1 24 27
M  V30 34 1 28 29
M  V30 END BOND
M  V30 BEGIN COLLECTION
M  V30 MDLV30/STEABS ATOMS=(2 4 10)
M  V30 END COLLECTION
M  V30 END CTAB
M  END
>  <ID>
CID110635

>  <name>
tadalafil

>  <smiles>
CN1CC(=O)N2[C@@H](C1=O)Cc3c([C@H]2c4cc5c(cc4)OCO5)[nH]c6ccccc36

$$$$
CID20055426
Actelion Java MolfileCreator 2.0

  0  0  0  0  0  0              0 V3000
M  V30 BEGIN CTAB
M  V30 COUNTS 44 51 0 0 0
M  V30 BEGIN ATOM
M  V30 1 O 8.6494 2.9612 0.0 0
M  V30 2 C 7.6713 3.1691 0.0 0 CFG=2
M  V30 3 C 6.9282 2.4999 0.0 0 CFG=2
M  V30 4 C 7.2646 4.0826 0.0 0
M  V30 5 C 6.0621 2.9999 0.0 0 CFG=1
M  V30 6 C 6.9282 1.4999 0.0 0
M  V30 7 C 7.8417 2.0932 0.0 0
M  V30 8 C 6.27 3.9781 0.0 0
M  V30 9 C 5.1961 2.4999 0.0 0 CFG=1
M  V30 10 C 6.0621 0.9999 0.0 0
M  V30 11 C 5.1961 1.4999 0.0 0 CFG=2
M  V30 12 C 4.3301 2.9999 0.0 0
M  V30 13 C 4.3301 0.9999 0.0 0 CFG=2
M  V30 14 C 3.4641 2.4999 0.0 0
M  V30 15 C 3.4641 1.4999 0.0 0 CFG=1
M  V30 16 C 4.3301 0.0 0.0 0
M  V30 17 C 5.1961 0.4999 0.0 0
M  V30 18 C 2.598 1.0 0.0 0
M  V30 19 C 3.4641 -0.5 0.0 0 CFG=2
M  V30 20 C 2.598 0.0 0.0 0
M  V30 21 C 3.4641 -1.5 0.0 0
M  V30 22 N 1.732 -0.5 0.0 0
M  V30 23 N 0.866 0.0 0.0 0
M  V30 24 C 0.0 -0.5 0.0 0
M  V30 25 C -0.866 0.0 0.0 0 CFG=1
M  V30 26 C 0.0 -1.5 0.0 0
M  V30 27 C -1.732 -0.4999 0.0 0
M  V30 28 C -0.866 1.0 0.0 0
M  V30 29 C -0.866 -1.9999 0.0 0 CFG=1
M  V30 30 C -1.732 -1.4999 0.0 0 CFG=1
M  V30 31 C -0.866 -2.9999 0.0 0
M  V30 32 C -2.598 -1.9999 0.0 0 CFG=2
M  V30 33 C -2.598 -0.9999 0.0 0
M  V30 34 C -1.732 -3.4999 0.0 0
M  V30 35 C -2.598 -2.9999 0.0 0 CFG=1
M  V30 36 C -3.4641 -1.4999 0.0 0
M  V30 37 C -3.4641 -3.4999 0.0 0 CFG=1
M  V30 38 C -4.3301 -1.9999 0.0 0
M  V30 39 C -4.3301 -2.9999 0.0 0 CFG=2
M  V30 40 C -3.672 -4.4781 0.0 0
M  V30 41 C -5.0732 -3.6691 0.0 0 CFG=2
M  V30 42 C -5.2436 -2.5932 0.0 0
M  V30 43 C -4.6665 -4.5826 0.0 0
M  V30 44 O -6.0514 -3.4612 0.0 0
M  V30 END ATOM
M  V30 BEGIN BOND
M  V30 1 1 2 1 CFG=3
M  V30 2 1 3 2
M  V30 3 1 2 4
M  V30 4 1 5 3
M  V30 5 1 3 6
M  V30 6 1 3 7 CFG=3
M  V30 7 1 4 8
M  V30 8 1 9 5
M  V30 9 1 6 10
M  V30 10 1 11 9
M  V30 11 1 9 12 CFG=1
M  V30 12 1 13 11
M  V30 13 1 12 14
M  V30 14 1 15 13
M  V30 15 1 13 16
M  V30 16 1 13 17 CFG=3
M  V30 17 1 15 18 CFG=3
M  V30 18 1 19 16
M  V30 19 1 18 20
M  V30 20 1 19 21 CFG=1
M  V30 21 2 20 22
M  V30 22 1 22 23
M  V30 23 2 23 24
M  V30 24 1 25 24
M  V30 25 1 24 26
M  V30 26 1 25 27
M  V30 27 1 25 28 CFG=1
M  V30 28 1 29 26 CFG=3
M  V30 29 1 30 27
M  V30 30 1 29 31
M  V30 31 1 32 30
M  V30 32 1 30 33 CFG=3
M  V30 33 1 31 34
M  V30 34 1 35 32
M  V30 35 1 32 36 CFG=3
M  V30 36 1 37 35
M  V30 37 1 36 38
M  V30 38 1 39 37
M  V30 39 1 37 40 CFG=3
M  V30 40 1 41 39
M  V30 41 1 39 42 CFG=3
M  V30 42 1 40 43
M  V30 43 1 41 44 CFG=3
M  V30 44 1 5 8 CFG=3
M  V30 45 1 11 10 CFG=3
M  V30 46 1 14 15
M  V30 47 1 19 20
M  V30 48 1 29 30
M  V30 49 1 35 34 CFG=1
M  V30 50 1 38 39
M  V30 51 1 41 43
M  V30 END BOND
M  V30 BEGIN COLLECTION
M  V30 MDLV30/STEABS ATOMS=(16 2 3 5 9 11 13 15 19 25 29 30 32 35 37 39 41)
M  V30 END COLLECTION
M  V30 END CTAB
M  END
>  <ID>
CID20055426

>  <name>
bolazine

>  <smiles>
C[C@H]1/C(=N/N=C\2/[C@@H](C[C@@]3([C@@H]4[C@H]([C@H]5[C@@]([C@H](CC5)O)(CC4)C)CC[C@H]3C2)C)C)/C[C@H]6[C@](C1)([C@@H]7[C@H]([C@H]8[C@@]([C@H](CC8)O)(CC7)C)CC6)C

$$$$
CID11494412
Actelion Java MolfileCreator 2.0

  0  0  0  0  0  0              0 V3000
M  V30 BEGIN CTAB
M  V30 COUNTS 28 33 0 0 0
M  V30 BEGIN ATOM
M  V30 1 O 0.866 0.0 0.0 0
M  V30 2 C 0.0 -0.5 0.0 0
M  V30 3 N -0.9135 -0.0932 0.0 0
M  V30 4 C -0.1045 -1.4945 0.0 0 CFG=1
M  V30 5 C -1.5826 -0.8364 0.0 0
M  V30 6 C 0.6386 -2.1636 0.0 0
M  V30 7 C -1.0826 -1.7024 0.0 0 CFG=1
M  V30 8 O -2.5771 -0.7318 0.0 0
M  V30 9 C 0.534 -3.1581 0.0 0
M  V30 10 C 1.6167 -1.9557 0.0 0
M  V30 11 C -1.4894 -2.6159 0.0 0
M  V30 12 C 1.4476 -3.5649 0.0 0
M  V30 13 C -0.2003 -3.8834 0.0 0
M  V30 14 N 2.1167 -2.8217 0.0 0
M  V30 15 C -2.4675 -2.8238 0.0 0
M  V30 16 C -0.9894 -3.482 0.0 0
M  V30 17 C 1.7566 -4.5159 0.0 0
M  V30 18 C 0.0075 -4.8615 0.0 0
M  V30 19 C 3.0949 -3.0296 0.0 0
M  V30 20 C -2.572 -3.8184 0.0 0
M  V30 21 C -3.2765 -2.2361 0.0 0
M  V30 22 N -1.6585 -4.2251 0.0 0
M  V30 23 C 0.9586 -5.1705 0.0 0
M  V30 24 C 2.7347 -4.7238 0.0 0
M  V30 25 C 3.4039 -3.9807 0.0 0
M  V30 26 C -3.4856 -4.2251 0.0 0
M  V30 27 C -4.1901 -2.6428 0.0 0
M  V30 28 C -4.2946 -3.6373 0.0 0
M  V30 END ATOM
M  V30 BEGIN BOND
M  V30 1 2 1 2
M  V30 2 1 2 3
M  V30 3 1 4 2
M  V30 4 1 3 5
M  V30 5 1 4 6 CFG=1
M  V30 6 1 7 4
M  V30 7 2 5 8
M  V30 8 1 6 9
M  V30 9 2 6 10
M  V30 10 1 7 11 CFG=3
M  V30 11 2 9 12
M  V30 12 1 9 13
M  V30 13 1 10 14
M  V30 14 1 11 15
M  V30 15 2 11 16
M  V30 16 1 12 17
M  V30 17 2 13 18
M  V30 18 1 14 19
M  V30 19 2 15 20
M  V30 20 1 15 21
M  V30 21 1 16 22
M  V30 22 2 17 23
M  V30 23 1 17 24
M  V30 24 1 19 25
M  V30 25 1 20 26
M  V30 26 2 21 27
M  V30 27 2 26 28
M  V30 28 1 5 7
M  V30 29 1 12 14
M  V30 30 1 18 23
M  V30 31 1 20 22
M  V30 32 1 24 25
M  V30 33 1 27 28
M  V30 END BOND
M  V30 BEGIN COLLECTION
M  V30 MDLV30/STEABS ATOMS=(2 4 7)
M  V30 END COLLECTION
M  V30 END CTAB
M  END
>  <ID>
CID11494412

>  <name>
tivantinib

>  <smiles>
C1Cc2c3c(ccc2)c(cn3C1)[C@H]4[C@@H](C(=O)NC4=O)c5c[nH]c6ccccc56

$$$$
11a
Actelion Java MolfileCreator 2.0

  0  0  0  0  0  0              0 V3000
M  V30 BEGIN CTAB
M  V30 COUNTS 42 45 0 0 0
M  V30 BEGIN ATOM
M  V30 1 O 9.5543 1.2787 0.0 0
M  V30 2 C 8.6032 1.5877 0.0 0
M  V30 3 N 8.2942 2.5388 0.0 0
M  V30 4 C 7.7942 0.9999 0.0 0 CFG=1
M  V30 5 C 7.2942 2.5388 0.0 0
M  V30 6 C 6.9852 1.5877 0.0 0
M  V30 7 C 7.7942 0.0 0.0 0
M  V30 8 C 6.9282 -0.5 0.0 0 CFG=2
M  V30 9 N 6.0621 0.0 0.0 0
M  V30 10 C 6.9282 -1.5 0.0 0
M  V30 11 C 5.1961 -0.5 0.0 0
M  V30 12 O 6.0621 -1.9999 0.0 0
M  V30 13 C 7.7942 -1.9999 0.0 0
M  V30 14 O 5.1961 -1.4999 0.0 0
M  V30 15 C 4.3301 0.0 0.0 0 CFG=1
M  V30 16 O 8.6602 -1.5 0.0 0
M  V30 17 N 7.7942 -3.0 0.0 0
M  V30 18 N 3.4641 -0.5 0.0 0
M  V30 19 C 4.3301 1.0 0.0 0
M  V30 20 C 8.6602 -3.5 0.0 0
M  V30 21 C 3.4641 -1.5 0.0 0
M  V30 22 C 3.4641 1.5 0.0 0
M  V30 23 C 9.5262 -2.9999 0.0 0
M  V30 24 O 4.3301 -2.0 0.0 0
M  V30 25 C 2.598 -2.0 0.0 0
M  V30 26 C 3.4641 2.5 0.0 0
M  V30 27 C 2.598 1.0 0.0 0
M  V30 28 C 10.3923 -3.4999 0.0 0
M  V30 29 C 9.5262 -1.9999 0.0 0
M  V30 30 C 2.598 -3.0 0.0 0
M  V30 31 C 2.598 3.0 0.0 0
M  V30 32 C 1.732 1.5 0.0 0
M  V30 33 C 11.2583 -2.9999 0.0 0
M  V30 34 C 10.3923 -1.4999 0.0 0
M  V30 35 C 1.732 -3.5 0.0 0
M  V30 36 C 1.732 2.5 0.0 0
M  V30 37 C 11.2583 -2.0 0.0 0
M  V30 38 C 1.732 -4.4999 0.0 0
M  V30 39 C 0.866 -3.0 0.0 0
M  V30 40 C 0.866 -5.0 0.0 0
M  V30 41 C 0.0 -3.5 0.0 0
M  V30 42 C 0.0 -4.5 0.0 0
M  V30 END ATOM
M  V30 BEGIN BOND
M  V30 1 2 1 2
M  V30 2 1 2 3
M  V30 3 1 4 2
M  V30 4 1 3 5
M  V30 5 1 4 6
M  V30 6 1 4 7 CFG=3
M  V30 7 1 8 7
M  V30 8 1 8 9 CFG=1
M  V30 9 1 8 10
M  V30 10 1 9 11
M  V30 11 2 10 12
M  V30 12 1 10 13
M  V30 13 2 11 14
M  V30 14 1 15 11
M  V30 15 2 13 16
M  V30 16 1 13 17
M  V30 17 1 15 18 CFG=1
M  V30 18 1 15 19
M  V30 19 1 17 20
M  V30 20 1 18 21
M  V30 21 1 19 22
M  V30 22 1 20 23
M  V30 23 2 21 24
M  V30 24 1 21 25
M  V30 25 2 22 26
M  V30 26 1 22 27
M  V30 27 2 23 28
M  V30 28 1 23 29
M  V30 29 2 25 30
M  V30 30 1 26 31
M  V30 31 2 27 32
M  V30 32 1 28 33
M  V30 33 2 29 34
M  V30 34 1 30 35
M  V30 35 2 31 36
M  V30 36 2 33 37
M  V30 37 2 35 38
M  V30 38 1 35 39
M  V30 39 1 38 40
M  V30 40 2 39 41
M  V30 41 2 40 42
M  V30 42 1 5 6
M  V30 43 1 32 36
M  V30 44 1 34 37
M  V30 45 1 41 42
M  V30 END BOND
M  V30 BEGIN COLLECTION
M  V30 MDLV30/STEABS ATOMS=(3 4 8 15)
M  V30 END COLLECTION
M  V30 END CTAB
M  END
>  <ID>
11a

>  <name>
11a

>  <smiles>
O=C(N[C@H](C(C(NCc1ccccc1)=O)=O)C[C@@H]2CCNC2=O)[C@H](Cc3ccccc3)NC(/C=C/c4ccccc4)=O

$$$$
11r
Actelion Java MolfileCreator 2.0

  0  0  0  0  0  0              0 V3000
M  V30 BEGIN CTAB
M  V30 COUNTS 42 45 0 0 0
M  V30 BEGIN ATOM
M  V30 1 O 9.5543 1.2787 0.0 0
M  V30 2 C 8.6032 1.5877 0.0 0
M  V30 3 N 8.2942 2.5388 0.0 0
M  V30 4 C 7.7942 0.9999 0.0 0 CFG=1
M  V30 5 C 7.2942 2.5388 0.0 0
M  V30 6 C 6.9852 1.5877 0.0 0
M  V30 7 C 7.7942 0.0 0.0 0
M  V30 8 C 6.9282 -0.5 0.0 0 CFG=2
M  V30 9 N 6.0621 0.0 0.0 0
M  V30 10 C 6.9282 -1.5 0.0 0
M  V30 11 C 5.1961 -0.5 0.0 0
M  V30 12 O 6.0621 -1.9999 0.0 0
M  V30 13 C 7.7942 -1.9999 0.0 0
M  V30 14 O 5.1961 -1.4999 0.0 0
M  V30 15 C 4.3301 0.0 0.0 0 CFG=1
M  V30 16 O 8.6602 -1.5 0.0 0
M  V30 17 N 7.7942 -3.0 0.0 0
M  V30 18 N 3.4641 -0.5 0.0 0
M  V30 19 C 4.3301 1.0 0.0 0
M  V30 20 C 8.6602 -3.5 0.0 0
M  V30 21 C 3.4641 -1.5 0.0 0
M  V30 22 C 3.4641 1.5 0.0 0
M  V30 23 C 9.5262 -2.9999 0.0 0
M  V30 24 O 4.3301 -2.0 0.0 0
M  V30 25 C 2.598 -2.0 0.0 0
M  V30 26 C 3.4641 2.5 0.0 0
M  V30 27 C 2.598 1.0 0.0 0
M  V30 28 C 10.3923 -3.4999 0.0 0
M  V30 29 C 9.5262 -1.9999 0.0 0
M  V30 30 C 2.598 -3.0 0.0 0
M  V30 31 C 2.598 3.0 0.0 0
M  V30 32 C 1.732 1.5 0.0 0
M  V30 33 C 11.2583 -2.9999 0.0 0
M  V30 34 C 10.3923 -1.4999 0.0 0
M  V30 35 C 1.732 -3.5 0.0 0
M  V30 36 C 1.732 2.5 0.0 0
M  V30 37 C 11.2583 -2.0 0.0 0
M  V30 38 C 1.732 -4.4999 0.0 0
M  V30 39 C 0.866 -3.0 0.0 0
M  V30 40 C 0.866 -5.0 0.0 0
M  V30 41 C 0.0 -3.5 0.0 0
M  V30 42 C 0.0 -4.5 0.0 0
M  V30 END ATOM
M  V30 BEGIN BOND
M  V30 1 2 1 2
M  V30 2 1 2 3
M  V30 3 1 4 2
M  V30 4 1 3 5
M  V30 5 1 4 6
M  V30 6 1 4 7 CFG=3
M  V30 7 1 8 7
M  V30 8 1 8 9 CFG=1
M  V30 9 1 8 10
M  V30 10 1 9 11
M  V30 11 2 10 12
M  V30 12 1 10 13
M  V30 13 2 11 14
M  V30 14 1 15 11
M  V30 15 2 13 16
M  V30 16 1 13 17
M  V30 17 1 15 18 CFG=1
M  V30 18 1 15 19
M  V30 19 1 17 20
M  V30 20 1 18 21
M  V30 21 1 19 22
M  V30 22 1 20 23
M  V30 23 2 21 24
M  V30 24 1 21 25
M  V30 25 1 22 26
M  V30 26 1 22 27
M  V30 27 2 23 28
M  V30 28 1 23 29
M  V30 29 2 25 30
M  V30 30 1 26 31
M  V30 31 1 27 32
M  V30 32 1 28 33
M  V30 33 2 29 34
M  V30 34 1 30 35
M  V30 35 1 31 36
M  V30 36 2 33 37
M  V30 37 2 35 38
M  V30 38 1 35 39
M  V30 39 1 38 40
M  V30 40 2 39 41
M  V30 41 2 40 42
M  V30 42 1 5 6
M  V30 43 1 32 36
M  V30 44 1 34 37
M  V30 45 1 41 42
M  V30 END BOND
M  V30 BEGIN COLLECTION
M  V30 MDLV30/STEABS ATOMS=(3 4 8 15)
M  V30 END COLLECTION
M  V30 END CTAB
M  END
>  <ID>
11r

>  <name>
11r

>  <smiles>
O=C(N[C@H](C(C(NCc1ccccc1)=O)=O)C[C@@H]2CCNC2=O)[C@H](CC3CCCCC3)NC(/C=C/c4ccccc4)=O

$$$$
11s
Actelion Java MolfileCreator 2.0

  0  0  0  0  0  0              0 V3000
M  V30 BEGIN CTAB
M  V30 COUNTS 39 42 0 0 0
M  V30 BEGIN ATOM
M  V30 1 O 7.1556 -3.6636 0.0 0
M  V30 2 C 7.8987 -2.9945 0.0 0
M  V30 3 N 8.8769 -3.2024 0.0 0
M  V30 4 C 7.7942 -2.0 0.0 0 CFG=1
M  V30 5 C 9.3769 -2.3364 0.0 0
M  V30 6 C 8.7077 -1.5932 0.0 0
M  V30 7 C 6.9282 -1.4999 0.0 0
M  V30 8 C 6.9282 -0.5 0.0 0 CFG=2
M  V30 9 N 6.0621 0.0 0.0 0
M  V30 10 C 7.7942 0.0 0.0 0
M  V30 11 C 5.1961 -0.5 0.0 0
M  V30 12 O 8.6602 -0.5 0.0 0
M  V30 13 C 7.7942 1.0 0.0 0
M  V30 14 O 5.1961 -1.4999 0.0 0
M  V30 15 C 4.3301 0.0 0.0 0 CFG=1
M  V30 16 O 6.9282 1.5 0.0 0
M  V30 17 N 8.6602 1.5 0.0 0
M  V30 18 N 4.3301 1.0 0.0 0
M  V30 19 C 3.4641 -0.5 0.0 0
M  V30 20 C 8.6602 2.5 0.0 0
M  V30 21 C 3.4641 1.5 0.0 0
M  V30 22 C 3.4641 -1.5 0.0 0
M  V30 23 C 9.5262 3.0 0.0 0
M  V30 24 O 2.598 1.0 0.0 0
M  V30 25 C 3.4641 2.5 0.0 0
M  V30 26 C 2.9641 -2.366 0.0 0
M  V30 27 C 3.9641 -2.366 0.0 0
M  V30 28 C 9.5262 4.0 0.0 0
M  V30 29 C 10.3923 2.5 0.0 0
M  V30 30 C 2.598 3.0 0.0 0
M  V30 31 C 10.3923 4.5 0.0 0
M  V30 32 C 11.2583 3.0 0.0 0
M  V30 33 C 2.598 4.0 0.0 0
M  V30 34 C 11.2583 4.0 0.0 0
M  V30 35 C 1.732 4.5 0.0 0
M  V30 36 C 3.4641 4.5 0.0 0
M  V30 37 C 1.732 5.5 0.0 0
M  V30 38 C 3.4641 5.5 0.0 0
M  V30 39 C 2.598 6.0 0.0 0
M  V30 END ATOM
M  V30 BEGIN BOND
M  V30 1 2 1 2
M  V30 2 1 2 3
M  V30 3 1 4 2
M  V30 4 1 3 5
M  V30 5 1 4 6
M  V30 6 1 4 7 CFG=3
M  V30 7 1 8 7
M  V30 8 1 8 9 CFG=3
M  V30 9 1 8 10
M  V30 10 1 9 11
M  V30 11 2 10 12
M  V30 12 1 10 13
M  V30 13 2 11 14
M  V30 14 1 15 11
M  V30 15 2 13 16
M  V30 16 1 13 17
M  V30 17 1 15 18 CFG=3
M  V30 18 1 15 19
M  V30 19 1 17 20
M  V30 20 1 18 21
M  V30 21 1 19 22
M  V30 22 1 20 23
M  V30 23 2 21 24
M  V30 24 1 21 25
M  V30 25 1 22 26
M  V30 26 1 22 27
M  V30 27 2 23 28
M  V30 28 1 23 29
M  V30 29 2 25 30
M  V30 30 1 28 31
M  V30 31 2 29 32
M  V30 32 1 30 33
M  V30 33 2 31 34
M  V30 34 2 33 35
M  V30 35 1 33 36
M  V30 36 1 35 37
M  V30 37 2 36 38
M  V30 38 2 37 39
M  V30 39 1 5 6
M  V30 40 1 26 27
M  V30 41 1 32 34
M  V30 42 1 38 39
M  V30 END BOND
M  V30 BEGIN COLLECTION
M  V30 MDLV30/STEABS ATOMS=(3 4 8 15)
M  V30 END COLLECTION
M  V30 END CTAB
M  END
>  <ID>
11s

>  <name>
11s

>  <smiles>
O=C(N[C@H](C(C(NCc1ccccc1)=O)=O)C[C@@H]2CCNC2=O)[C@H](CC3CC3)NC(/C=C/c4ccccc4)=O

$$$$
ZINC000541677852
Actelion Java MolfileCreator 2.0

  0  0  0  0  0  0              0 V3000
M  V30 BEGIN CTAB
M  V30 COUNTS 28 30 0 0 0
M  V30 BEGIN ATOM
M  V30 1 F 6.1385 -2.03 0.0 0
M  V30 2 C 5.8295 -2.981 0.0 0
M  V30 3 F 6.7806 -3.29 0.0 0
M  V30 4 F 5.5205 -3.9321 0.0 0
M  V30 5 C 4.8785 -2.672 0.0 0
M  V30 6 C 4.6705 -1.6939 0.0 0
M  V30 7 C 4.1353 -3.3411 0.0 0
M  V30 8 C 3.7195 -1.3848 0.0 0
M  V30 9 C 3.1843 -3.0321 0.0 0
M  V30 10 N 3.5116 -0.4067 0.0 0
M  V30 11 C 2.9763 -2.054 0.0 0
M  V30 12 N 4.1807 0.3364 0.0 0
M  V30 13 C 2.598 0.0 0.0 0
M  V30 14 C 3.6807 1.2024 0.0 0
M  V30 15 N 1.732 -0.5 0.0 0
M  V30 16 C 2.7026 0.9945 0.0 0
M  V30 17 C 4.0874 2.1159 0.0 0
M  V30 18 C 0.866 0.0 0.0 0
M  V30 19 O 0.866 1.0 0.0 0
M  V30 20 C 0.0 -0.5 0.0 0
M  V30 21 C -0.866 0.0 0.0 0
M  V30 22 C 0.0 -1.4999 0.0 0
M  V30 23 C -1.732 -0.4999 0.0 0
M  V30 24 C -0.866 -1.9999 0.0 0
M  V30 25 O -2.598 0.0 0.0 0
M  V30 26 N -1.732 -1.4999 0.0 0
M  V30 27 C -0.866 -2.9999 0.0 0
M  V30 28 C 0.0 -3.4999 0.0 0
M  V30 END ATOM
M  V30 BEGIN BOND
M  V30 1 1 1 2
M  V30 2 1 2 3
M  V30 3 1 2 4
M  V30 4 1 2 5
M  V30 5 2 5 6
M  V30 6 1 5 7
M  V30 7 1 6 8
M  V30 8 2 7 9
M  V30 9 1 8 10
M  V30 10 2 8 11
M  V30 11 1 10 12
M  V30 12 1 10 13
M  V30 13 1 12 14
M  V30 14 2 13 15 CFG=2
M  V30 15 1 13 16
M  V30 16 1 14 17
M  V30 17 1 15 18
M  V30 18 2 18 19
M  V30 19 1 18 20
M  V30 20 1 20 21
M  V30 21 1 20 22
M  V30 22 1 21 23
M  V30 23 1 22 24
M  V30 24 2 23 25
M  V30 25 1 23 26
M  V30 26 1 24 27
M  V30 27 1 27 28
M  V30 28 1 9 11
M  V30 29 2 14 16
M  V30 30 1 24 26
M  V30 END BOND
M  V30 END CTAB
M  END
>  <ID>
ZINC000541677852

>  <name>
NA

>  <smiles>
CCC1CC(CC(=O)N1)C(=O)N=c1cc(C)[nH]n1-c1cccc(c1)C(F)(F)F

$$$$
ZINC001655436520
Actelion Java MolfileCreator 2.0

  0  0  0  0  0  0              0 V3000
M  V30 BEGIN CTAB
M  V30 COUNTS 27 29 0 0 0
M  V30 BEGIN ATOM
M  V30 1 F 5.7451 1.299 0.0 0
M  V30 2 C 6.4951 0.0 0.0 0
M  V30 3 F 7.7942 0.7499 0.0 0
M  V30 4 F 7.2451 -1.299 0.0 0
M  V30 5 C 5.1961 -0.75 0.0 0
M  V30 6 O 5.1961 -2.25 0.0 0
M  V30 7 C 3.8971 0.0 0.0 0
M  V30 8 N 2.598 -0.75 0.0 0
M  V30 9 C 3.8971 1.5 0.0 0
M  V30 10 C 1.299 0.0 0.0 0
M  V30 11 C 2.598 2.25 0.0 0
M  V30 12 C 0.0 -0.75 0.0 0
M  V30 13 C 2.598 3.75 0.0 0
M  V30 14 C 1.299 1.5 0.0 0
M  V30 15 N -1.299 0.0 0.0 0
M  V30 16 C 0.0 -2.2499 0.0 0
M  V30 17 C 1.299 4.5 0.0 0
M  V30 18 C 0.0 2.25 0.0 0
M  V30 19 C -2.598 -0.7499 0.0 0
M  V30 20 C -1.299 -2.9999 0.0 0
M  V30 21 C 0.0 3.75 0.0 0
M  V30 22 N -4.0246 -0.2864 0.0 0
M  V30 23 N -2.598 -2.2499 0.0 0
M  V30 24 O -1.299 -4.4999 0.0 0
M  V30 25 C -4.9063 -1.4999 0.0 0
M  V30 26 N -4.0246 -2.7135 0.0 0
M  V30 27 N -6.4063 -1.4999 0.0 0
M  V30 END ATOM
M  V30 BEGIN BOND
M  V30 1 1 1 2
M  V30 2 1 2 3
M  V30 3 1 2 4
M  V30 4 1 2 5
M  V30 5 1 5 6
M  V30 6 1 5 7
M  V30 7 1 7 8
M  V30 8 1 7 9
M  V30 9 1 8 10
M  V30 10 1 9 11
M  V30 11 1 10 12
M  V30 12 2 11 13
M  V30 13 1 11 14
M  V30 14 1 12 15
M  V30 15 2 12 16
M  V30 16 1 13 17
M  V30 17 2 14 18
M  V30 18 1 15 19
M  V30 19 1 16 20
M  V30 20 2 17 21
M  V30 21 2 19 22
M  V30 22 1 19 23
M  V30 23 2 20 24
M  V30 24 1 22 25
M  V30 25 1 23 26
M  V30 26 2 25 27
M  V30 27 1 18 21
M  V30 28 1 20 23
M  V30 29 1 25 26
M  V30 END BOND
M  V30 END CTAB
M  END
>  <ID>
ZINC001655436520

>  <name>
NA

>  <smiles>
OC(C(Cc1ccccc1)NCc1cc(=O)n2[nH]c(=N)nc2[nH]1)C(F)(F)F

$$$$
ZINC001218583693
Actelion Java MolfileCreator 2.0

  0  0  0  0  0  0              0 V3000
M  V30 BEGIN CTAB
M  V30 COUNTS 27 29 0 0 0
M  V30 BEGIN ATOM
M  V30 1 S 7.7942 -0.75 0.0 0
M  V30 2 C 6.4951 0.0 0.0 0
M  V30 3 C 9.0932 0.0 0.0 0
M  V30 4 N 6.4951 1.5 0.0 0
M  V30 5 N 5.1961 -0.7499 0.0 0
M  V30 6 C 5.1961 2.25 0.0 0
M  V30 7 C 3.8971 0.0 0.0 0
M  V30 8 O 5.1961 3.75 0.0 0
M  V30 9 C 3.8971 1.5 0.0 0
M  V30 10 N 2.598 -0.75 0.0 0
M  V30 11 C 1.299 0.0 0.0 0
M  V30 12 O 1.299 1.5 0.0 0
M  V30 13 C 0.0 -0.75 0.0 0
M  V30 14 C -1.299 0.0 0.0 0
M  V30 15 C 0.0 -2.25 0.0 0
M  V30 16 C -2.598 -0.7499 0.0 0
M  V30 17 C -1.299 -3.0 0.0 0
M  V30 18 N -3.8971 0.0 0.0 0
M  V30 19 C -2.598 -2.2499 0.0 0
M  V30 20 C -3.8971 1.5 0.0 0
M  V30 21 O -2.598 2.25 0.0 0
M  V30 22 C -5.1961 2.25 0.0 0
M  V30 23 N -5.3529 3.7417 0.0 0
M  V30 24 C -6.5664 1.6398 0.0 0
M  V30 25 C -6.8201 4.0536 0.0 0
M  V30 26 C -7.5701 2.7546 0.0 0
M  V30 27 S -9.0619 2.5978 0.0 0
M  V30 END ATOM
M  V30 BEGIN BOND
M  V30 1 1 1 2
M  V30 2 1 1 3
M  V30 3 2 2 4
M  V30 4 1 2 5
M  V30 5 1 4 6
M  V30 6 1 5 7
M  V30 7 2 6 8
M  V30 8 1 6 9
M  V30 9 1 7 10
M  V30 10 1 10 11
M  V30 11 2 11 12
M  V30 12 1 11 13
M  V30 13 2 13 14
M  V30 14 1 13 15
M  V30 15 1 14 16
M  V30 16 2 15 17
M  V30 17 1 16 18
M  V30 18 2 16 19
M  V30 19 1 18 20
M  V30 20 2 20 21
M  V30 21 1 20 22
M  V30 22 1 22 23
M  V30 23 1 22 24
M  V30 24 1 23 25
M  V30 25 1 24 26
M  V30 26 1 26 27
M  V30 27 2 7 9
M  V30 28 1 17 19
M  V30 29 1 25 26
M  V30 END BOND
M  V30 END CTAB
M  END
>  <ID>
ZINC001218583693

>  <name>
NA

>  <smiles>
CSc1nc(=O)cc(NC(=O)c2cccc(NC(=O)C3CC(S)CN3)c2)[nH]1

$$$$
ZINC000636416501
Actelion Java MolfileCreator 2.0

  0  0  0  0  0  0              0 V3000
M  V30 BEGIN CTAB
M  V30 COUNTS 28 31 0 0 0
M  V30 BEGIN ATOM
M  V30 1 Cl 5.8295 -2.981 0.0 0
M  V30 2 C 4.8785 -2.672 0.0 0
M  V30 3 C 4.6705 -1.6939 0.0 0
M  V30 4 C 4.1353 -3.3411 0.0 0
M  V30 5 C 3.7195 -1.3848 0.0 0
M  V30 6 C 3.1843 -3.0321 0.0 0
M  V30 7 N 3.5116 -0.4067 0.0 0
M  V30 8 C 2.9763 -2.054 0.0 0
M  V30 9 N 4.1807 0.3364 0.0 0
M  V30 10 C 2.598 0.0 0.0 0
M  V30 11 C 3.6807 1.2024 0.0 0
M  V30 12 N 1.732 -0.5 0.0 0
M  V30 13 C 2.7026 0.9945 0.0 0
M  V30 14 C 4.0874 2.1159 0.0 0
M  V30 15 C 0.866 0.0 0.0 0 CFG=1
M  V30 16 O 0.866 1.0 0.0 0
M  V30 17 C 0.0 -0.5 0.0 0
M  V30 18 C -0.866 0.0 0.0 0
M  V30 19 C 0.0 -1.4999 0.0 0
M  V30 20 C -1.732 -0.4999 0.0 0
M  V30 21 C -0.866 1.0 0.0 0
M  V30 22 C -0.866 -1.9999 0.0 0
M  V30 23 N -1.732 -1.4999 0.0 0
M  V30 24 C -2.598 0.0 0.0 0
M  V30 25 C -1.732 1.5 0.0 0
M  V30 26 O -0.866 -2.9999 0.0 0
M  V30 27 C -2.598 1.0 0.0 0
M  V30 28 F -3.4641 1.5 0.0 0
M  V30 END ATOM
M  V30 BEGIN BOND
M  V30 1 1 1 2
M  V30 2 2 2 3
M  V30 3 1 2 4
M  V30 4 1 3 5
M  V30 5 2 4 6
M  V30 6 1 5 7
M  V30 7 2 5 8
M  V30 8 1 7 9
M  V30 9 1 7 10
M  V30 10 1 9 11
M  V30 11 2 10 12 CFG=2
M  V30 12 1 10 13
M  V30 13 1 11 14
M  V30 14 1 15 12
M  V30 15 1 15 16 CFG=3
M  V30 16 1 15 17
M  V30 17 1 17 18
M  V30 18 2 17 19
M  V30 19 2 18 20
M  V30 20 1 18 21
M  V30 21 1 19 22
M  V30 22 1 20 23
M  V30 23 1 20 24
M  V30 24 2 21 25
M  V30 25 2 22 26
M  V30 26 2 24 27
M  V30 27 1 27 28
M  V30 28 1 6 8
M  V30 29 2 11 13
M  V30 30 1 22 23
M  V30 31 1 25 27
M  V30 END BOND
M  V30 BEGIN COLLECTION
M  V30 MDLV30/STERAC1 ATOMS=(1 15)
M  V30 END COLLECTION
M  V30 END CTAB
M  END
>  <ID>
ZINC000636416501

>  <name>
NA

>  <smiles>
Cc1cc(=NC(O)c2cc(=O)[nH]c3cc(F)ccc23)n([nH]1)-c1cccc(Cl)c1

$$$$
ZINC000543523838
Actelion Java MolfileCreator 2.0

  0  0  0  0  0  0              0 V3000
M  V30 BEGIN CTAB
M  V30 COUNTS 25 27 0 0 0
M  V30 BEGIN ATOM
M  V30 1 Br 5.8295 -2.981 0.0 0
M  V30 2 C 4.8785 -2.672 0.0 0
M  V30 3 C 4.6705 -1.6939 0.0 0
M  V30 4 C 4.1353 -3.3411 0.0 0
M  V30 5 C 3.7195 -1.3848 0.0 0
M  V30 6 C 3.1843 -3.0321 0.0 0
M  V30 7 N 3.5116 -0.4067 0.0 0
M  V30 8 C 2.9763 -2.054 0.0 0
M  V30 9 N 4.1807 0.3364 0.0 0
M  V30 10 C 2.598 0.0 0.0 0
M  V30 11 C 3.6807 1.2024 0.0 0
M  V30 12 N 1.732 -0.5 0.0 0
M  V30 13 C 2.7026 0.9945 0.0 0
M  V30 14 C 4.0874 2.1159 0.0 0
M  V30 15 C 0.866 0.0 0.0 0
M  V30 16 O 0.866 1.0 0.0 0
M  V30 17 C 0.0 -0.5 0.0 0
M  V30 18 C -0.866 0.0 0.0 0
M  V30 19 C 0.0 -1.4999 0.0 0
M  V30 20 C -1.732 -0.4999 0.0 0
M  V30 21 C -0.866 -1.9999 0.0 0
M  V30 22 O -2.598 0.0 0.0 0
M  V30 23 N -1.732 -1.4999 0.0 0
M  V30 24 C -0.866 -2.9999 0.0 0
M  V30 25 C 0.0 -3.4999 0.0 0
M  V30 END ATOM
M  V30 BEGIN BOND
M  V30 1 1 1 2
M  V30 2 2 2 3
M  V30 3 1 2 4
M  V30 4 1 3 5
M  V30 5 2 4 6
M  V30 6 1 5 7
M  V30 7 2 5 8
M  V30 8 1 7 9
M  V30 9 1 7 10
M  V30 10 1 9 11
M  V30 11 2 10 12 CFG=2
M  V30 12 1 10 13
M  V30 13 1 11 14
M  V30 14 1 12 15
M  V30 15 2 15 16
M  V30 16 1 15 17
M  V30 17 1 17 18
M  V30 18 1 17 19
M  V30 19 1 18 20
M  V30 20 1 19 21
M  V30 21 2 20 22
M  V30 22 1 20 23
M  V30 23 1 21 24
M  V30 24 1 24 25
M  V30 25 1 6 8
M  V30 26 2 11 13
M  V30 27 1 21 23
M  V30 END BOND
M  V30 END CTAB
M  END
>  <ID>
ZINC000543523838

>  <name>
NA

>  <smiles>
CCC1CC(CC(=O)N1)C(=O)N=c1cc(C)[nH]n1-c1cccc(Br)c1

$$$$
ZINC001186058814
Actelion Java MolfileCreator 2.0

  0  0  0  0  0  0              0 V3000
M  V30 BEGIN CTAB
M  V30 COUNTS 27 29 0 0 0
M  V30 BEGIN ATOM
M  V30 1 O 6.8333 1.9478 0.0 0
M  V30 2 C 6.0902 1.2787 0.0 0
M  V30 3 N 6.2981 0.3006 0.0 0
M  V30 4 C 5.1391 1.5877 0.0 0
M  V30 5 N 4.3301 0.9999 0.0 0
M  V30 6 C 4.8301 2.5388 0.0 0
M  V30 7 C 4.3301 0.0 0.0 0
M  V30 8 C 3.5211 1.5877 0.0 0
M  V30 9 C 3.8301 2.5388 0.0 0
M  V30 10 O 5.1961 -0.5 0.0 0
M  V30 11 C 3.4641 -0.5 0.0 0
M  V30 12 N 2.598 0.0 0.0 0
M  V30 13 C 3.4641 -1.5 0.0 0
M  V30 14 C 1.732 -0.5 0.0 0
M  V30 15 C 4.3301 -2.0 0.0 0
M  V30 16 O 0.866 0.0 0.0 0
M  V30 17 C 1.732 -1.5 0.0 0
M  V30 18 N 4.4346 -2.9945 0.0 0
M  V30 19 C 5.2436 -1.5932 0.0 0
M  V30 20 N 0.866 -2.0 0.0 0
M  V30 21 C 5.4128 -3.2024 0.0 0
M  V30 22 N 5.9128 -2.3364 0.0 0
M  V30 23 C 0.7614 -2.9945 0.0 0
M  V30 24 C -0.0475 -1.5932 0.0 0
M  V30 25 C -0.2166 -3.2024 0.0 0
M  V30 26 C -0.7166 -2.3364 0.0 0
M  V30 27 O -0.6233 -4.1159 0.0 0
M  V30 END ATOM
M  V30 BEGIN BOND
M  V30 1 2 1 2
M  V30 2 1 2 3
M  V30 3 1 2 4
M  V30 4 1 4 5
M  V30 5 1 4 6
M  V30 6 1 5 7
M  V30 7 1 5 8
M  V30 8 1 6 9
M  V30 9 2 7 10
M  V30 10 1 7 11
M  V30 11 1 11 12
M  V30 12 1 11 13
M  V30 13 1 12 14
M  V30 14 1 13 15
M  V30 15 2 14 16
M  V30 16 1 14 17
M  V30 17 1 15 18
M  V30 18 2 15 19
M  V30 19 1 17 20
M  V30 20 2 18 21
M  V30 21 1 19 22
M  V30 22 1 20 23
M  V30 23 1 20 24
M  V30 24 1 23 25
M  V30 25 1 24 26
M  V30 26 1 25 27
M  V30 27 1 8 9
M  V30 28 1 21 22
M  V30 29 1 25 26
M  V30 END BOND
M  V30 END CTAB
M  END
>  <ID>
ZINC001186058814

>  <name>
NA

>  <smiles>
NC(=O)C1CCCN1C(=O)C(Cc1c[nH]cn1)NC(=O)CN1CCC(O)C1

$$$$
ZINC001062595734
Actelion Java MolfileCreator 2.0

  0  0  0  0  0  0              0 V3000
M  V30 BEGIN CTAB
M  V30 COUNTS 25 27 0 0 0
M  V30 BEGIN ATOM
M  V30 1 O 1.9884 -5.3006 0.0 0
M  V30 2 C 2.119 -4.3091 0.0 0
M  V30 3 N 3.0428 -3.9264 0.0 0
M  V30 4 C 1.3256 -3.7004 0.0 0
M  V30 5 C 3.1734 -2.935 0.0 0
M  V30 6 C 1.4561 -2.7089 0.0 0
M  V30 7 C 2.38 -2.3262 0.0 0
M  V30 8 C 4.0972 -2.5523 0.0 0
M  V30 9 C 0.6628 -2.1002 0.0 0
M  V30 10 C 4.2278 -1.5609 0.0 0
M  V30 11 O -0.261 -2.4828 0.0 0
M  V30 12 N 0.7933 -1.1087 0.0 0
M  V30 13 C 0.0 -0.5 0.0 0
M  V30 14 C -0.9659 -0.2411 0.0 0
M  V30 15 C -0.2588 -1.4659 0.0 0
M  V30 16 C 0.866 0.0 0.0 0
M  V30 17 C -1.2247 -1.2071 0.0 0
M  V30 18 N 1.732 -0.5 0.0 0
M  V30 19 C 2.598 0.0 0.0 0
M  V30 20 O 3.4641 -0.5 0.0 0
M  V30 21 C 2.598 1.0 0.0 0
M  V30 22 N 3.407 1.5877 0.0 0
M  V30 23 C 1.789 1.5877 0.0 0
M  V30 24 N 3.098 2.5388 0.0 0
M  V30 25 C 2.098 2.5388 0.0 0
M  V30 END ATOM
M  V30 BEGIN BOND
M  V30 1 2 1 2
M  V30 2 1 2 3
M  V30 3 1 2 4
M  V30 4 1 3 5
M  V30 5 1 4 6
M  V30 6 1 5 7
M  V30 7 1 5 8
M  V30 8 1 6 9
M  V30 9 1 8 10
M  V30 10 2 9 11
M  V30 11 1 9 12
M  V30 12 1 12 13
M  V30 13 1 13 14
M  V30 14 1 13 15
M  V30 15 1 13 16
M  V30 16 1 14 17
M  V30 17 1 16 18
M  V30 18 1 18 19
M  V30 19 2 19 20
M  V30 20 1 19 21
M  V30 21 2 21 22
M  V30 22 1 21 23
M  V30 23 1 22 24
M  V30 24 2 23 25
M  V30 25 1 6 7
M  V30 26 1 15 17
M  V30 27 1 24 25
M  V30 END BOND
M  V30 END CTAB
M  END
>  <ID>
ZINC001062595734

>  <name>
NA

>  <smiles>
CCC1CC(CC(=O)N1)C(=O)NC1(CNC(=O)c2cc[nH]n2)CCC1

$$$$
ZINC000544491494
Actelion Java MolfileCreator 2.0

  0  0  0  0  0  0              0 V3000
M  V30 BEGIN CTAB
M  V30 COUNTS 24 26 0 0 0
M  V30 BEGIN ATOM
M  V30 1 Br 5.8295 -2.981 0.0 0
M  V30 2 C 4.8785 -2.672 0.0 0
M  V30 3 C 4.6705 -1.6939 0.0 0
M  V30 4 C 4.1353 -3.3411 0.0 0
M  V30 5 C 3.7195 -1.3848 0.0 0
M  V30 6 C 3.1843 -3.0321 0.0 0
M  V30 7 N 3.5116 -0.4067 0.0 0
M  V30 8 C 2.9763 -2.054 0.0 0
M  V30 9 N 4.1807 0.3364 0.0 0
M  V30 10 C 2.598 0.0 0.0 0
M  V30 11 C 3.6807 1.2024 0.0 0
M  V30 12 N 1.732 -0.5 0.0 0
M  V30 13 C 2.7026 0.9945 0.0 0
M  V30 14 C 4.0874 2.1159 0.0 0
M  V30 15 C 0.866 0.0 0.0 0
M  V30 16 O 0.866 1.0 0.0 0
M  V30 17 C 0.0 -0.5 0.0 0
M  V30 18 C -0.866 0.0 0.0 0
M  V30 19 C 0.0 -1.4999 0.0 0
M  V30 20 C -1.732 -0.4999 0.0 0
M  V30 21 C -0.866 -1.9999 0.0 0
M  V30 22 O -2.598 0.0 0.0 0
M  V30 23 N -1.732 -1.4999 0.0 0
M  V30 24 C -0.866 -2.9999 0.0 0
M  V30 END ATOM
M  V30 BEGIN BOND
M  V30 1 1 1 2
M  V30 2 2 2 3
M  V30 3 1 2 4
M  V30 4 1 3 5
M  V30 5 2 4 6
M  V30 6 1 5 7
M  V30 7 2 5 8
M  V30 8 1 7 9
M  V30 9 1 7 10
M  V30 10 1 9 11
M  V30 11 2 10 12 CFG=2
M  V30 12 1 10 13
M  V30 13 1 11 14
M  V30 14 1 12 15
M  V30 15 2 15 16
M  V30 16 1 15 17
M  V30 17 1 17 18
M  V30 18 1 17 19
M  V30 19 1 18 20
M  V30 20 1 19 21
M  V30 21 2 20 22
M  V30 22 1 20 23
M  V30 23 1 21 24
M  V30 24 1 6 8
M  V30 25 2 11 13
M  V30 26 1 21 23
M  V30 END BOND
M  V30 END CTAB
M  END
>  <ID>
ZINC000544491494

>  <name>
NA

>  <smiles>
CC1CC(CC(=O)N1)C(=O)N=c1cc(C)[nH]n1-c1cccc(Br)c1

$$$$
ZINC000373659060
Actelion Java MolfileCreator 2.0

  0  0  0  0  0  0              0 V3000
M  V30 BEGIN CTAB
M  V30 COUNTS 28 31 0 0 0
M  V30 BEGIN ATOM
M  V30 1 F 9.0932 -3.0 0.0 0
M  V30 2 C 7.7942 -2.25 0.0 0
M  V30 3 C 7.7942 -0.75 0.0 0
M  V30 4 C 6.4951 -2.9999 0.0 0
M  V30 5 C 6.4951 0.0 0.0 0
M  V30 6 C 5.1961 -2.25 0.0 0
M  V30 7 N 6.4951 1.4999 0.0 0
M  V30 8 C 5.1961 -0.7499 0.0 0
M  V30 9 C 5.1961 2.25 0.0 0
M  V30 10 C 3.8971 0.0 0.0 0
M  V30 11 O 5.1961 3.75 0.0 0
M  V30 12 C 3.8971 1.4999 0.0 0
M  V30 13 C 2.598 -0.75 0.0 0 CFG=2
M  V30 14 O 2.598 -2.25 0.0 0
M  V30 15 N 1.299 0.0 0.0 0
M  V30 16 C 0.0 -0.75 0.0 0
M  V30 17 C -1.299 0.0 0.0 0
M  V30 18 C 0.0 -2.2499 0.0 0
M  V30 19 C -1.299 1.5 0.0 0
M  V30 20 C -2.598 -0.7499 0.0 0
M  V30 21 C -1.299 -2.9999 0.0 0
M  V30 22 C -0.0855 2.3816 0.0 0
M  V30 23 C -2.5125 2.3816 0.0 0
M  V30 24 C -2.598 -2.2499 0.0 0
M  V30 25 N -0.549 3.8082 0.0 0
M  V30 26 N -2.049 3.8082 0.0 0
M  V30 27 F -3.8971 -2.9999 0.0 0
M  V30 28 C -2.9307 5.0217 0.0 0
M  V30 END ATOM
M  V30 BEGIN BOND
M  V30 1 1 1 2
M  V30 2 2 2 3
M  V30 3 1 2 4
M  V30 4 1 3 5
M  V30 5 2 4 6
M  V30 6 1 5 7
M  V30 7 2 5 8
M  V30 8 1 7 9
M  V30 9 1 8 10
M  V30 10 2 9 11
M  V30 11 1 9 12
M  V30 12 1 13 10
M  V30 13 1 13 14 CFG=3
M  V30 14 1 13 15
M  V30 15 1 15 16
M  V30 16 2 16 17
M  V30 17 1 16 18
M  V30 18 1 17 19
M  V30 19 1 17 20
M  V30 20 2 18 21
M  V30 21 1 19 22
M  V30 22 2 19 23
M  V30 23 2 20 24
M  V30 24 2 22 25
M  V30 25 1 23 26
M  V30 26 1 24 27
M  V30 27 1 26 28
M  V30 28 1 6 8
M  V30 29 2 10 12
M  V30 30 1 21 24
M  V30 31 1 25 26
M  V30 END BOND
M  V30 BEGIN COLLECTION
M  V30 MDLV30/STERAC1 ATOMS=(1 13)
M  V30 END COLLECTION
M  V30 END CTAB
M  END
>  <ID>
ZINC000373659060

>  <name>
NA

>  <smiles>
Cn1cc(cn1)-c1cc(F)ccc1NC(O)c1cc(=O)[nH]c2cc(F)ccc12

$$$$
ZINC000452259570
Actelion Java MolfileCreator 2.0

  0  0  0  0  0  0              0 V3000
M  V30 BEGIN CTAB
M  V30 COUNTS 25 27 0 0 0
M  V30 BEGIN ATOM
M  V30 1 F 3.5355 -4.5531 0.0 0
M  V30 2 C 2.5696 -4.2943 0.0 0
M  V30 3 F 2.3107 -5.2602 0.0 0
M  V30 4 F 1.6036 -4.0355 0.0 0
M  V30 5 O 2.8284 -3.3284 0.0 0
M  V30 6 C 2.1213 -2.6213 0.0 0
M  V30 7 C 2.3801 -1.6553 0.0 0
M  V30 8 C 1.1553 -2.8801 0.0 0
M  V30 9 C 1.673 -0.9482 0.0 0
M  V30 10 C 0.4482 -2.173 0.0 0
M  V30 11 C 0.7071 -1.2071 0.0 0
M  V30 12 C 0.0 -0.5 0.0 0
M  V30 13 N 0.866 0.0 0.0 0
M  V30 14 C -1.0 -0.4999 0.0 0
M  V30 15 C -0.5 -1.366 0.0 0
M  V30 16 C 0.866 0.9999 0.0 0
M  V30 17 O 1.732 1.4999 0.0 0
M  V30 18 C 0.0 1.5 0.0 0
M  V30 19 C -0.866 1.0 0.0 0
M  V30 20 C 0.0 2.5 0.0 0
M  V30 21 C -1.732 1.4999 0.0 0
M  V30 22 C -0.866 2.9999 0.0 0
M  V30 23 O -2.598 1.0 0.0 0
M  V30 24 N -1.732 2.5 0.0 0
M  V30 25 C -0.866 4.0 0.0 0
M  V30 END ATOM
M  V30 BEGIN BOND
M  V30 1 1 1 2
M  V30 2 1 2 3
M  V30 3 1 2 4
M  V30 4 1 2 5
M  V30 5 1 5 6
M  V30 6 2 6 7
M  V30 7 1 6 8
M  V30 8 1 7 9
M  V30 9 2 8 10
M  V30 10 2 9 11
M  V30 11 1 11 12
M  V30 12 1 12 13
M  V30 13 1 12 14
M  V30 14 1 12 15
M  V30 15 1 13 16
M  V30 16 2 16 17
M  V30 17 1 16 18
M  V30 18 1 18 19
M  V30 19 1 18 20
M  V30 20 1 19 21
M  V30 21 1 20 22
M  V30 22 2 21 23
M  V30 23 1 21 24
M  V30 24 1 22 25
M  V30 25 1 10 11
M  V30 26 1 14 15
M  V30 27 1 22 24
M  V30 END BOND
M  V30 END CTAB
M  END
>  <ID>
ZINC000452259570

>  <name>
NA

>  <smiles>
CC1CC(CC(=O)N1)C(=O)NC1(CC1)c1ccc(OC(F)(F)F)cc1

$$$$
ZINC000571366263
Actelion Java MolfileCreator 2.0

  0  0  0  0  0  0              0 V3000
M  V30 BEGIN CTAB
M  V30 COUNTS 26 28 0 0 0
M  V30 BEGIN ATOM
M  V30 1 F 3.8993 -1.8398 0.0 0
M  V30 2 C 3.3546 -2.6785 0.0 0
M  V30 3 F 4.1933 -3.2231 0.0 0
M  V30 4 F 2.81 -3.5172 0.0 0
M  V30 5 C 2.516 -2.1339 0.0 0
M  V30 6 C 2.5683 -1.1352 0.0 0
M  V30 7 C 1.625 -2.5879 0.0 0
M  V30 8 C 1.7296 -0.5906 0.0 0
M  V30 9 C 0.7863 -2.0432 0.0 0
M  V30 10 C 0.8386 -1.0446 0.0 0
M  V30 11 C 0.0 -0.5 0.0 0
M  V30 12 N 0.866 0.0 0.0 0
M  V30 13 C -0.9135 -0.0932 0.0 0
M  V30 14 C -0.1045 -1.4945 0.0 0
M  V30 15 C 0.866 0.9999 0.0 0
M  V30 16 C -1.5826 -0.8364 0.0 0
M  V30 17 C -1.0826 -1.7024 0.0 0
M  V30 18 O 1.732 1.4999 0.0 0
M  V30 19 C 0.0 1.5 0.0 0
M  V30 20 C -0.866 1.0 0.0 0
M  V30 21 C 0.0 2.5 0.0 0
M  V30 22 C -1.732 1.4999 0.0 0
M  V30 23 C -0.866 2.9999 0.0 0
M  V30 24 O -2.598 1.0 0.0 0
M  V30 25 N -1.732 2.5 0.0 0
M  V30 26 C -0.866 4.0 0.0 0
M  V30 END ATOM
M  V30 BEGIN BOND
M  V30 1 1 1 2
M  V30 2 1 2 3
M  V30 3 1 2 4
M  V30 4 1 2 5
M  V30 5 2 5 6
M  V30 6 1 5 7
M  V30 7 1 6 8
M  V30 8 2 7 9
M  V30 9 2 8 10
M  V30 10 1 10 11
M  V30 11 1 11 12
M  V30 12 1 11 13
M  V30 13 1 11 14
M  V30 14 1 12 15
M  V30 15 1 13 16
M  V30 16 1 14 17
M  V30 17 2 15 18
M  V30 18 1 15 19
M  V30 19 1 19 20
M  V30 20 1 19 21
M  V30 21 1 20 22
M  V30 22 1 21 23
M  V30 23 2 22 24
M  V30 24 1 22 25
M  V30 25 1 23 26
M  V30 26 1 9 10
M  V30 27 1 16 17
M  V30 28 1 23 25
M  V30 END BOND
M  V30 END CTAB
M  END
>  <ID>
ZINC000571366263

>  <name>
NA

>  <smiles>
CC1CC(CC(=O)N1)C(=O)NC1(CCCC1)c1ccc(cc1)C(F)(F)F

$$$$
ZINC001062522311
Actelion Java MolfileCreator 2.0

  0  0  0  0  0  0              0 V3000
M  V30 BEGIN CTAB
M  V30 COUNTS 25 27 0 0 0
M  V30 BEGIN ATOM
M  V30 1 O 1.9884 -5.3006 0.0 0
M  V30 2 C 2.119 -4.3091 0.0 0
M  V30 3 N 3.0428 -3.9264 0.0 0
M  V30 4 C 1.3256 -3.7004 0.0 0
M  V30 5 C 3.1734 -2.935 0.0 0
M  V30 6 C 1.4561 -2.7089 0.0 0
M  V30 7 C 2.38 -2.3262 0.0 0
M  V30 8 C 4.0972 -2.5523 0.0 0
M  V30 9 C 0.6628 -2.1002 0.0 0
M  V30 10 C 4.2278 -1.5609 0.0 0
M  V30 11 O -0.261 -2.4828 0.0 0
M  V30 12 N 0.7933 -1.1087 0.0 0
M  V30 13 C 0.0 -0.5 0.0 0
M  V30 14 C -0.9659 -0.2411 0.0 0
M  V30 15 C -0.2588 -1.4659 0.0 0
M  V30 16 C 0.866 0.0 0.0 0
M  V30 17 C -1.2247 -1.2071 0.0 0
M  V30 18 N 1.732 -0.5 0.0 0
M  V30 19 C 2.598 0.0 0.0 0
M  V30 20 O 3.4641 -0.5 0.0 0
M  V30 21 C 2.598 1.0 0.0 0
M  V30 22 N 3.407 1.5877 0.0 0
M  V30 23 C 1.789 1.5877 0.0 0
M  V30 24 C 3.098 2.5388 0.0 0
M  V30 25 C 2.098 2.5388 0.0 0
M  V30 END ATOM
M  V30 BEGIN BOND
M  V30 1 2 1 2
M  V30 2 1 2 3
M  V30 3 1 2 4
M  V30 4 1 3 5
M  V30 5 1 4 6
M  V30 6 1 5 7
M  V30 7 1 5 8
M  V30 8 1 6 9
M  V30 9 1 8 10
M  V30 10 2 9 11
M  V30 11 1 9 12
M  V30 12 1 12 13
M  V30 13 1 13 14
M  V30 14 1 13 15
M  V30 15 1 13 16
M  V30 16 1 14 17
M  V30 17 1 16 18
M  V30 18 1 18 19
M  V30 19 2 19 20
M  V30 20 1 19 21
M  V30 21 1 21 22
M  V30 22 2 21 23
M  V30 23 1 22 24
M  V30 24 1 23 25
M  V30 25 1 6 7
M  V30 26 1 15 17
M  V30 27 2 24 25
M  V30 END BOND
M  V30 END CTAB
M  END
>  <ID>
ZINC001062522311

>  <name>
NA

>  <smiles>
CCC1CC(CC(=O)N1)C(=O)NC1(CNC(=O)c2ccc[nH]2)CCC1

$$$$
ZINC000067726685
Actelion Java MolfileCreator 2.0

  0  0  0  0  0  0              0 V3000
M  V30 BEGIN CTAB
M  V30 COUNTS 27 30 0 0 0
M  V30 BEGIN ATOM
M  V30 1 O 7.7942 -0.75 0.0 0
M  V30 2 C 6.4951 0.0 0.0 0
M  V30 3 N 6.4951 1.5 0.0 0
M  V30 4 C 5.1961 -0.7499 0.0 0
M  V30 5 C 5.1961 2.25 0.0 0
M  V30 6 C 3.8971 0.0 0.0 0
M  V30 7 C 3.8971 1.5 0.0 0
M  V30 8 C 5.1961 3.75 0.0 0
M  V30 9 C 2.598 -0.75 0.0 0 CFG=2
M  V30 10 C 2.598 2.25 0.0 0
M  V30 11 C 3.8971 4.5 0.0 0
M  V30 12 O 2.598 -2.25 0.0 0
M  V30 13 N 1.299 0.0 0.0 0
M  V30 14 C 2.598 3.7499 0.0 0
M  V30 15 C 0.0 -0.75 0.0 0
M  V30 16 C -0.0785 0.7479 0.0 0
M  V30 17 C -0.1567 -2.2417 0.0 0
M  V30 18 C -1.3703 -0.1398 0.0 0
M  V30 19 C -1.415 1.4289 0.0 0
M  V30 20 C 1.1795 1.5649 0.0 0
M  V30 21 C -1.624 -2.5536 0.0 0
M  V30 22 C -2.374 -1.2546 0.0 0
M  V30 23 C -1.4935 2.9268 0.0 0
M  V30 24 C 1.1009 3.0628 0.0 0
M  V30 25 C -0.2355 3.7438 0.0 0
M  V30 26 O -0.314 5.2417 0.0 0
M  V30 27 C 0.9439 6.0587 0.0 0
M  V30 END ATOM
M  V30 BEGIN BOND
M  V30 1 2 1 2
M  V30 2 1 2 3
M  V30 3 1 2 4
M  V30 4 1 3 5
M  V30 5 2 4 6
M  V30 6 2 5 7
M  V30 7 1 5 8
M  V30 8 1 9 6
M  V30 9 1 7 10
M  V30 10 2 8 11
M  V30 11 1 9 12 CFG=3
M  V30 12 1 9 13
M  V30 13 2 10 14
M  V30 14 1 13 15
M  V30 15 1 15 16
M  V30 16 1 15 17
M  V30 17 1 15 18
M  V30 18 2 16 19
M  V30 19 1 16 20
M  V30 20 1 17 21
M  V30 21 1 18 22
M  V30 22 1 19 23
M  V30 23 2 20 24
M  V30 24 2 23 25
M  V30 25 1 25 26
M  V30 26 1 26 27
M  V30 27 1 6 7
M  V30 28 1 11 14
M  V30 29 1 21 22
M  V30 30 1 24 25
M  V30 END BOND
M  V30 BEGIN COLLECTION
M  V30 MDLV30/STERAC1 ATOMS=(1 9)
M  V30 END COLLECTION
M  V30 END CTAB
M  END
>  <ID>
ZINC000067726685

>  <name>
NA

>  <smiles>
COc1ccc(cc1)C1(CCCC1)NC(O)c1cc(=O)[nH]c2ccccc12

$$$$
ZINC000544491491
Actelion Java MolfileCreator 2.0

  0  0  0  0  0  0              0 V3000
M  V30 BEGIN CTAB
M  V30 COUNTS 24 26 0 0 0
M  V30 BEGIN ATOM
M  V30 1 Br 5.8295 -2.981 0.0 0
M  V30 2 C 4.8785 -2.672 0.0 0
M  V30 3 C 4.6705 -1.6939 0.0 0
M  V30 4 C 4.1353 -3.3411 0.0 0
M  V30 5 C 3.7195 -1.3848 0.0 0
M  V30 6 C 3.1843 -3.0321 0.0 0
M  V30 7 N 3.5116 -0.4067 0.0 0
M  V30 8 C 2.9763 -2.054 0.0 0
M  V30 9 N 4.1807 0.3364 0.0 0
M  V30 10 C 2.598 0.0 0.0 0
M  V30 11 C 3.6807 1.2024 0.0 0
M  V30 12 N 1.732 -0.5 0.0 0
M  V30 13 C 2.7026 0.9945 0.0 0
M  V30 14 C 4.0874 2.1159 0.0 0
M  V30 15 C 0.866 0.0 0.0 0
M  V30 16 O 0.866 1.0 0.0 0
M  V30 17 C 0.0 -0.5 0.0 0
M  V30 18 C -0.866 0.0 0.0 0
M  V30 19 C 0.0 -1.4999 0.0 0
M  V30 20 C -1.732 -0.4999 0.0 0
M  V30 21 C -0.866 -1.9999 0.0 0
M  V30 22 O -2.598 0.0 0.0 0
M  V30 23 N -1.732 -1.4999 0.0 0
M  V30 24 C -0.866 -2.9999 0.0 0
M  V30 END ATOM
M  V30 BEGIN BOND
M  V30 1 1 1 2
M  V30 2 2 2 3
M  V30 3 1 2 4
M  V30 4 1 3 5
M  V30 5 2 4 6
M  V30 6 1 5 7
M  V30 7 2 5 8
M  V30 8 1 7 9
M  V30 9 1 7 10
M  V30 10 1 9 11
M  V30 11 2 10 12 CFG=2
M  V30 12 1 10 13
M  V30 13 1 11 14
M  V30 14 1 12 15
M  V30 15 2 15 16
M  V30 16 1 15 17
M  V30 17 1 17 18
M  V30 18 1 17 19
M  V30 19 1 18 20
M  V30 20 1 19 21
M  V30 21 2 20 22
M  V30 22 1 20 23
M  V30 23 1 21 24
M  V30 24 1 6 8
M  V30 25 2 11 13
M  V30 26 1 21 23
M  V30 END BOND
M  V30 END CTAB
M  END
>  <ID>
ZINC000544491491

>  <name>
NA

>  <smiles>
CC1CC(CC(=O)N1)C(=O)N=c1cc(C)[nH]n1-c1cccc(Br)c1

$$$$
ZINC000911999327
Actelion Java MolfileCreator 2.0

  0  0  0  0  0  0              0 V3000
M  V30 BEGIN CTAB
M  V30 COUNTS 24 26 0 0 0
M  V30 BEGIN ATOM
M  V30 1 F 2.4641 2.5 0.0 0
M  V30 2 C 3.4641 2.5 0.0 0
M  V30 3 F 3.4641 3.5 0.0 0
M  V30 4 F 4.4641 2.5 0.0 0
M  V30 5 C 3.4641 1.5 0.0 0
M  V30 6 C 2.598 1.0 0.0 0
M  V30 7 C 4.3301 1.0 0.0 0
M  V30 8 C 2.598 0.0 0.0 0
M  V30 9 C 4.3301 0.0 0.0 0
M  V30 10 C 3.4641 -0.4999 0.0 0
M  V30 11 C 1.732 -0.5 0.0 0 CFG=1
M  V30 12 O 1.732 -1.5 0.0 0
M  V30 13 C 0.866 0.0 0.0 0
M  V30 14 O 0.866 1.0 0.0 0
M  V30 15 N 0.0 -0.5 0.0 0
M  V30 16 C -0.866 0.0 0.0 0
M  V30 17 C 0.0 -1.4999 0.0 0
M  V30 18 C -1.732 -0.4999 0.0 0
M  V30 19 C -0.1589 0.7071 0.0 0
M  V30 20 C -1.5731 0.7071 0.0 0
M  V30 21 C -0.866 -1.9999 0.0 0
M  V30 22 C -1.732 -1.4999 0.0 0
M  V30 23 C -0.866 1.4142 0.0 0
M  V30 24 O -2.598 -1.9999 0.0 0
M  V30 END ATOM
M  V30 BEGIN BOND
M  V30 1 1 1 2
M  V30 2 1 2 3
M  V30 3 1 2 4
M  V30 4 1 2 5
M  V30 5 2 5 6
M  V30 6 1 5 7
M  V30 7 1 6 8
M  V30 8 2 7 9
M  V30 9 2 8 10
M  V30 10 1 11 8
M  V30 11 1 11 12 CFG=1
M  V30 12 1 11 13
M  V30 13 2 13 14
M  V30 14 1 13 15
M  V30 15 1 15 16
M  V30 16 1 15 17
M  V30 17 1 16 18
M  V30 18 1 16 19
M  V30 19 1 16 20
M  V30 20 1 17 21
M  V30 21 1 18 22
M  V30 22 1 19 23
M  V30 23 2 22 24
M  V30 24 1 9 10
M  V30 25 1 20 23
M  V30 26 1 21 22
M  V30 END BOND
M  V30 BEGIN COLLECTION
M  V30 MDLV30/STERAC1 ATOMS=(1 11)
M  V30 END COLLECTION
M  V30 END CTAB
M  END
>  <ID>
ZINC000911999327

>  <name>
NA

>  <smiles>
OC(C(=O)N1CCC(=O)CC11CCC1)c1cccc(c1)C(F)(F)F

$$$$
ZINC000541676760
Actelion Java MolfileCreator 2.0

  0  0  0  0  0  0              0 V3000
M  V30 BEGIN CTAB
M  V30 COUNTS 27 29 0 0 0
M  V30 BEGIN ATOM
M  V30 1 F 6.1385 -2.03 0.0 0
M  V30 2 C 5.8295 -2.981 0.0 0
M  V30 3 F 6.7806 -3.29 0.0 0
M  V30 4 F 5.5205 -3.9321 0.0 0
M  V30 5 C 4.8785 -2.672 0.0 0
M  V30 6 C 4.6705 -1.6939 0.0 0
M  V30 7 C 4.1353 -3.3411 0.0 0
M  V30 8 C 3.7195 -1.3848 0.0 0
M  V30 9 C 3.1843 -3.0321 0.0 0
M  V30 10 N 3.5116 -0.4067 0.0 0
M  V30 11 C 2.9763 -2.054 0.0 0
M  V30 12 N 4.1807 0.3364 0.0 0
M  V30 13 C 2.598 0.0 0.0 0
M  V30 14 C 3.6807 1.2024 0.0 0
M  V30 15 N 1.732 -0.5 0.0 0
M  V30 16 C 2.7026 0.9945 0.0 0
M  V30 17 C 4.0874 2.1159 0.0 0
M  V30 18 C 0.866 0.0 0.0 0
M  V30 19 O 0.866 1.0 0.0 0
M  V30 20 C 0.0 -0.5 0.0 0
M  V30 21 C -0.866 0.0 0.0 0
M  V30 22 C 0.0 -1.4999 0.0 0
M  V30 23 C -1.732 -0.4999 0.0 0
M  V30 24 C -0.866 -1.9999 0.0 0
M  V30 25 O -2.598 0.0 0.0 0
M  V30 26 N -1.732 -1.4999 0.0 0
M  V30 27 C -0.866 -2.9999 0.0 0
M  V30 END ATOM
M  V30 BEGIN BOND
M  V30 1 1 1 2
M  V30 2 1 2 3
M  V30 3 1 2 4
M  V30 4 1 2 5
M  V30 5 2 5 6
M  V30 6 1 5 7
M  V30 7 1 6 8
M  V30 8 2 7 9
M  V30 9 1 8 10
M  V30 10 2 8 11
M  V30 11 1 10 12
M  V30 12 1 10 13
M  V30 13 1 12 14
M  V30 14 2 13 15 CFG=2
M  V30 15 1 13 16
M  V30 16 1 14 17
M  V30 17 1 15 18
M  V30 18 2 18 19
M  V30 19 1 18 20
M  V30 20 1 20 21
M  V30 21 1 20 22
M  V30 22 1 21 23
M  V30 23 1 22 24
M  V30 24 2 23 25
M  V30 25 1 23 26
M  V30 26 1 24 27
M  V30 27 1 9 11
M  V30 28 2 14 16
M  V30 29 1 24 26
M  V30 END BOND
M  V30 END CTAB
M  END
>  <ID>
ZINC000541676760

>  <name>
NA

>  <smiles>
CC1CC(CC(=O)N1)C(=O)N=c1cc(C)[nH]n1-c1cccc(c1)C(F)(F)F

$$$$
ZINC000543523837
Actelion Java MolfileCreator 2.0

  0  0  0  0  0  0              0 V3000
M  V30 BEGIN CTAB
M  V30 COUNTS 25 27 0 0 0
M  V30 BEGIN ATOM
M  V30 1 Br 5.8295 -2.981 0.0 0
M  V30 2 C 4.8785 -2.672 0.0 0
M  V30 3 C 4.6705 -1.6939 0.0 0
M  V30 4 C 4.1353 -3.3411 0.0 0
M  V30 5 C 3.7195 -1.3848 0.0 0
M  V30 6 C 3.1843 -3.0321 0.0 0
M  V30 7 N 3.5116 -0.4067 0.0 0
M  V30 8 C 2.9763 -2.054 0.0 0
M  V30 9 N 4.1807 0.3364 0.0 0
M  V30 10 C 2.598 0.0 0.0 0
M  V30 11 C 3.6807 1.2024 0.0 0
M  V30 12 N 1.732 -0.5 0.0 0
M  V30 13 C 2.7026 0.9945 0.0 0
M  V30 14 C 4.0874 2.1159 0.0 0
M  V30 15 C 0.866 0.0 0.0 0
M  V30 16 O 0.866 1.0 0.0 0
M  V30 17 C 0.0 -0.5 0.0 0
M  V30 18 C -0.866 0.0 0.0 0
M  V30 19 C 0.0 -1.4999 0.0 0
M  V30 20 C -1.732 -0.4999 0.0 0
M  V30 21 C -0.866 -1.9999 0.0 0
M  V30 22 O -2.598 0.0 0.0 0
M  V30 23 N -1.732 -1.4999 0.0 0
M  V30 24 C -0.866 -2.9999 0.0 0
M  V30 25 C 0.0 -3.4999 0.0 0
M  V30 END ATOM
M  V30 BEGIN BOND
M  V30 1 1 1 2
M  V30 2 2 2 3
M  V30 3 1 2 4
M  V30 4 1 3 5
M  V30 5 2 4 6
M  V30 6 1 5 7
M  V30 7 2 5 8
M  V30 8 1 7 9
M  V30 9 1 7 10
M  V30 10 1 9 11
M  V30 11 2 10 12 CFG=2
M  V30 12 1 10 13
M  V30 13 1 11 14
M  V30 14 1 12 15
M  V30 15 2 15 16
M  V30 16 1 15 17
M  V30 17 1 17 18
M  V30 18 1 17 19
M  V30 19 1 18 20
M  V30 20 1 19 21
M  V30 21 2 20 22
M  V30 22 1 20 23
M  V30 23 1 21 24
M  V30 24 1 24 25
M  V30 25 1 6 8
M  V30 26 2 11 13
M  V30 27 1 21 23
M  V30 END BOND
M  V30 END CTAB
M  END
>  <ID>
ZINC000543523837

>  <name>
NA

>  <smiles>
CCC1CC(CC(=O)N1)C(=O)N=c1cc(C)[nH]n1-c1cccc(Br)c1

$$$$
ZINC000504840908
Actelion Java MolfileCreator 2.0

  0  0  0  0  0  0              0 V3000
M  V30 BEGIN CTAB
M  V30 COUNTS 25 27 0 0 0
M  V30 BEGIN ATOM
M  V30 1 F 3.8993 -1.8398 0.0 0
M  V30 2 C 3.3546 -2.6785 0.0 0
M  V30 3 F 4.1933 -3.2231 0.0 0
M  V30 4 F 2.81 -3.5172 0.0 0
M  V30 5 C 2.516 -2.1339 0.0 0
M  V30 6 C 2.5683 -1.1352 0.0 0
M  V30 7 C 1.625 -2.5879 0.0 0
M  V30 8 C 1.7296 -0.5906 0.0 0
M  V30 9 C 0.7863 -2.0432 0.0 0
M  V30 10 C 0.8386 -1.0446 0.0 0
M  V30 11 C 0.0 -0.5 0.0 0
M  V30 12 N 0.866 0.0 0.0 0
M  V30 13 C -0.9135 -0.0932 0.0 0
M  V30 14 C -0.1045 -1.4945 0.0 0
M  V30 15 C 0.866 0.9999 0.0 0
M  V30 16 C -1.5826 -0.8364 0.0 0
M  V30 17 C -1.0826 -1.7024 0.0 0
M  V30 18 O 1.732 1.4999 0.0 0
M  V30 19 C 0.0 1.5 0.0 0 CFG=2
M  V30 20 C 0.0 2.5 0.0 0
M  V30 21 C -0.866 1.0 0.0 0
M  V30 22 C -0.866 3.0 0.0 0
M  V30 23 C -1.732 1.5 0.0 0
M  V30 24 O -0.866 4.0 0.0 0
M  V30 25 N -1.732 2.5 0.0 0
M  V30 END ATOM
M  V30 BEGIN BOND
M  V30 1 1 1 2
M  V30 2 1 2 3
M  V30 3 1 2 4
M  V30 4 1 2 5
M  V30 5 2 5 6
M  V30 6 1 5 7
M  V30 7 1 6 8
M  V30 8 2 7 9
M  V30 9 2 8 10
M  V30 10 1 10 11
M  V30 11 1 11 12
M  V30 12 1 11 13
M  V30 13 1 11 14
M  V30 14 1 12 15
M  V30 15 1 13 16
M  V30 16 1 14 17
M  V30 17 2 15 18
M  V30 18 1 19 15 CFG=1
M  V30 19 1 19 20
M  V30 20 1 19 21
M  V30 21 1 20 22
M  V30 22 1 21 23
M  V30 23 2 22 24
M  V30 24 1 22 25
M  V30 25 1 9 10
M  V30 26 1 16 17
M  V30 27 1 23 25
M  V30 END BOND
M  V30 BEGIN COLLECTION
M  V30 MDLV30/STERAC1 ATOMS=(1 19)
M  V30 END COLLECTION
M  V30 END CTAB
M  END
>  <ID>
ZINC000504840908

>  <name>
NA

>  <smiles>
FC(F)(F)c1ccc(cc1)C1(CCCC1)NC(=O)C1CCNC(=O)C1

$$$$
ZINC001462418688
Actelion Java MolfileCreator 2.0

  0  0  0  0  0  0              0 V3000
M  V30 BEGIN CTAB
M  V30 COUNTS 26 29 0 0 0
M  V30 BEGIN ATOM
M  V30 1 F 9.0932 -3.0 0.0 0
M  V30 2 C 7.7942 -2.25 0.0 0
M  V30 3 C 7.7942 -0.75 0.0 0
M  V30 4 C 6.4951 -2.9999 0.0 0
M  V30 5 C 6.4951 0.0 0.0 0
M  V30 6 C 5.1961 -2.25 0.0 0
M  V30 7 N 6.4951 1.4999 0.0 0
M  V30 8 C 5.1961 -0.7499 0.0 0
M  V30 9 C 5.1961 2.25 0.0 0
M  V30 10 C 3.8971 0.0 0.0 0
M  V30 11 O 5.1961 3.75 0.0 0
M  V30 12 C 3.8971 1.4999 0.0 0
M  V30 13 C 2.598 -0.75 0.0 0
M  V30 14 O 2.598 -2.25 0.0 0
M  V30 15 N 1.299 0.0 0.0 0
M  V30 16 C 0.0 -0.75 0.0 0
M  V30 17 C -1.299 0.0 0.0 0
M  V30 18 C 0.0 -2.2499 0.0 0
M  V30 19 C -2.598 -0.7499 0.0 0
M  V30 20 C -1.299 1.5 0.0 0
M  V30 21 F 1.299 -3.0 0.0 0
M  V30 22 C -1.299 -2.9999 0.0 0
M  V30 23 C -3.8971 0.0 0.0 0
M  V30 24 C -2.598 -2.2499 0.0 0
M  V30 25 C -2.598 2.25 0.0 0
M  V30 26 C -3.8971 1.5 0.0 0
M  V30 END ATOM
M  V30 BEGIN BOND
M  V30 1 1 1 2
M  V30 2 2 2 3
M  V30 3 1 2 4
M  V30 4 1 3 5
M  V30 5 2 4 6
M  V30 6 1 5 7
M  V30 7 2 5 8
M  V30 8 1 7 9
M  V30 9 1 8 10
M  V30 10 2 9 11
M  V30 11 1 9 12
M  V30 12 1 10 13
M  V30 13 1 13 14
M  V30 14 1 13 15
M  V30 15 1 15 16
M  V30 16 1 16 17
M  V30 17 1 16 18
M  V30 18 2 17 19
M  V30 19 1 17 20
M  V30 20 1 18 21
M  V30 21 1 18 22
M  V30 22 1 19 23
M  V30 23 1 19 24
M  V30 24 2 20 25
M  V30 25 2 23 26
M  V30 26 1 6 8
M  V30 27 2 10 12
M  V30 28 1 22 24
M  V30 29 1 25 26
M  V30 END BOND
M  V30 END CTAB
M  END
>  <ID>
ZINC001462418688

>  <name>
NA

>  <smiles>
OC(NC1C(F)CCc2ccccc12)c1cc(=O)[nH]c2cc(F)ccc12

$$$$
ZINC001064295830
Actelion Java MolfileCreator 2.0

  0  0  0  0  0  0              0 V3000
M  V30 BEGIN CTAB
M  V30 COUNTS 23 24 0 0 0
M  V30 BEGIN ATOM
M  V30 1 O 1.9884 -5.3006 0.0 0
M  V30 2 C 2.119 -4.3091 0.0 0
M  V30 3 N 3.0428 -3.9264 0.0 0
M  V30 4 C 1.3256 -3.7004 0.0 0
M  V30 5 C 3.1734 -2.935 0.0 0
M  V30 6 C 1.4561 -2.7089 0.0 0
M  V30 7 C 2.38 -2.3262 0.0 0
M  V30 8 C 4.0972 -2.5523 0.0 0
M  V30 9 C 0.6628 -2.1002 0.0 0
M  V30 10 C 4.2278 -1.5609 0.0 0
M  V30 11 O -0.261 -2.4828 0.0 0
M  V30 12 N 0.7933 -1.1087 0.0 0
M  V30 13 C 0.0 -0.5 0.0 0
M  V30 14 C -0.9659 -0.2411 0.0 0
M  V30 15 C -0.2588 -1.4659 0.0 0
M  V30 16 C 0.866 0.0 0.0 0
M  V30 17 C -1.2247 -1.2071 0.0 0
M  V30 18 N 0.866 0.9999 0.0 0
M  V30 19 C 1.732 1.4999 0.0 0
M  V30 20 O 2.598 0.9999 0.0 0
M  V30 21 C 1.732 2.4999 0.0 0
M  V30 22 O 2.598 3.0 0.0 0
M  V30 23 N 0.866 3.0 0.0 0
M  V30 END ATOM
M  V30 BEGIN BOND
M  V30 1 2 1 2
M  V30 2 1 2 3
M  V30 3 1 2 4
M  V30 4 1 3 5
M  V30 5 1 4 6
M  V30 6 1 5 7
M  V30 7 1 5 8
M  V30 8 1 6 9
M  V30 9 1 8 10
M  V30 10 2 9 11
M  V30 11 1 9 12
M  V30 12 1 12 13
M  V30 13 1 13 14
M  V30 14 1 13 15
M  V30 15 1 13 16
M  V30 16 1 14 17
M  V30 17 1 16 18
M  V30 18 1 18 19
M  V30 19 2 19 20
M  V30 20 1 19 21
M  V30 21 2 21 22
M  V30 22 1 21 23
M  V30 23 1 6 7
M  V30 24 1 15 17
M  V30 END BOND
M  V30 END CTAB
M  END
>  <ID>
ZINC001064295830

>  <name>
NA

>  <smiles>
CCC1CC(CC(=O)N1)C(=O)NC1(CNC(=O)C(N)=O)CCC1

$$$$
ZINC001481893831
Actelion Java MolfileCreator 2.0

  0  0  0  0  0  0              0 V3000
M  V30 BEGIN CTAB
M  V30 COUNTS 25 27 0 0 0
M  V30 BEGIN ATOM
M  V30 1 F 4.3301 -2.9999 0.0 0
M  V30 2 C 4.3301 -1.9999 0.0 0
M  V30 3 C 5.1961 -1.5 0.0 0
M  V30 4 C 3.4641 -1.5 0.0 0
M  V30 5 N 5.1961 -0.5 0.0 0
M  V30 6 C 3.4641 -0.5 0.0 0
M  V30 7 C 4.3301 0.0 0.0 0
M  V30 8 C 2.598 0.0 0.0 0
M  V30 9 N 1.732 -0.5 0.0 0
M  V30 10 C 0.866 0.0 0.0 0
M  V30 11 C 0.0 -0.5 0.0 0
M  V30 12 N 0.8386 -1.0446 0.0 0
M  V30 13 C -0.9135 -0.0932 0.0 0
M  V30 14 C -0.1045 -1.4945 0.0 0
M  V30 15 C 0.7863 -2.0432 0.0 0
M  V30 16 C -1.5826 -0.8364 0.0 0
M  V30 17 C -1.0826 -1.7024 0.0 0
M  V30 18 O -0.1046 -2.4972 0.0 0
M  V30 19 C 1.625 -2.5879 0.0 0 CFG=2
M  V30 20 C 1.5726 -3.5865 0.0 0
M  V30 21 C 2.516 -2.1339 0.0 0
M  V30 22 C 2.4113 -4.1311 0.0 0
M  V30 23 C 3.3546 -2.6785 0.0 0
M  V30 24 O 2.359 -5.1298 0.0 0
M  V30 25 N 3.3023 -3.6771 0.0 0
M  V30 END ATOM
M  V30 BEGIN BOND
M  V30 1 1 1 2
M  V30 2 2 2 3
M  V30 3 1 2 4
M  V30 4 1 3 5
M  V30 5 2 4 6
M  V30 6 2 5 7
M  V30 7 1 6 8
M  V30 8 1 8 9
M  V30 9 1 9 10
M  V30 10 1 10 11
M  V30 11 1 11 12
M  V30 12 1 11 13
M  V30 13 1 11 14
M  V30 14 1 12 15
M  V30 15 1 13 16
M  V30 16 1 14 17
M  V30 17 2 15 18
M  V30 18 1 19 15 CFG=1
M  V30 19 1 19 20
M  V30 20 1 19 21
M  V30 21 1 20 22
M  V30 22 1 21 23
M  V30 23 2 22 24
M  V30 24 1 22 25
M  V30 25 1 6 7
M  V30 26 1 16 17
M  V30 27 1 23 25
M  V30 END BOND
M  V30 BEGIN COLLECTION
M  V30 MDLV30/STERAC1 ATOMS=(1 19)
M  V30 END COLLECTION
M  V30 END CTAB
M  END
>  <ID>
ZINC001481893831

>  <name>
NA

>  <smiles>
Fc1cncc(CNCC2(CCCC2)NC(=O)C2CCNC(=O)C2)c1

$$$$
ZINC000544552415
Actelion Java MolfileCreator 2.0

  0  0  0  0  0  0              0 V3000
M  V30 BEGIN CTAB
M  V30 COUNTS 26 28 0 0 0
M  V30 BEGIN ATOM
M  V30 1 O 2.598 3.9999 0.0 0
M  V30 2 C 2.598 2.9999 0.0 0
M  V30 3 N 3.4641 2.4999 0.0 0
M  V30 4 C 1.732 2.4999 0.0 0
M  V30 5 C 3.4641 1.4999 0.0 0
M  V30 6 C 1.732 1.4999 0.0 0
M  V30 7 C 2.598 0.9999 0.0 0
M  V30 8 C 4.3301 0.9999 0.0 0
M  V30 9 C 0.866 0.9999 0.0 0
M  V30 10 O 0.0 1.5 0.0 0
M  V30 11 N 0.866 0.0 0.0 0
M  V30 12 C 0.0 -0.5 0.0 0
M  V30 13 C 0.8386 -1.0446 0.0 0
M  V30 14 C -0.9135 -0.0932 0.0 0
M  V30 15 C -0.1045 -1.4945 0.0 0
M  V30 16 C 0.7863 -2.0432 0.0 0
M  V30 17 C 1.7296 -0.5906 0.0 0
M  V30 18 C -1.5826 -0.8364 0.0 0
M  V30 19 C -1.0826 -1.7024 0.0 0
M  V30 20 C 1.625 -2.5879 0.0 0
M  V30 21 C 2.5683 -1.1352 0.0 0
M  V30 22 C 2.516 -2.1339 0.0 0
M  V30 23 C 3.3546 -2.6785 0.0 0
M  V30 24 C 3.8993 -1.8398 0.0 0
M  V30 25 C 4.1933 -3.2231 0.0 0
M  V30 26 C 2.81 -3.5172 0.0 0
M  V30 END ATOM
M  V30 BEGIN BOND
M  V30 1 2 1 2
M  V30 2 1 2 3
M  V30 3 1 2 4
M  V30 4 1 3 5
M  V30 5 1 4 6
M  V30 6 1 5 7
M  V30 7 1 5 8
M  V30 8 1 6 9
M  V30 9 2 9 10
M  V30 10 1 9 11
M  V30 11 1 11 12
M  V30 12 1 12 13
M  V30 13 1 12 14
M  V30 14 1 12 15
M  V30 15 2 13 16
M  V30 16 1 13 17
M  V30 17 1 14 18
M  V30 18 1 15 19
M  V30 19 1 16 20
M  V30 20 2 17 21
M  V30 21 2 20 22
M  V30 22 1 22 23
M  V30 23 1 23 24
M  V30 24 1 23 25
M  V30 25 1 23 26
M  V30 26 1 6 7
M  V30 27 1 18 19
M  V30 28 1 21 22
M  V30 END BOND
M  V30 END CTAB
M  END
>  <ID>
ZINC000544552415

>  <name>
NA

>  <smiles>
CC1CC(CC(=O)N1)C(=O)NC1(CCCC1)c1ccc(cc1)C(C)(C)C

$$$$
ZINC000152979101
Actelion Java MolfileCreator 2.0

  0  0  0  0  0  0              0 V3000
M  V30 BEGIN CTAB
M  V30 COUNTS 23 25 0 0 0
M  V30 BEGIN ATOM
M  V30 1 Br 5.8295 -2.981 0.0 0
M  V30 2 C 4.8785 -2.672 0.0 0
M  V30 3 C 4.6705 -1.6939 0.0 0
M  V30 4 C 4.1353 -3.3411 0.0 0
M  V30 5 C 3.7195 -1.3848 0.0 0
M  V30 6 C 3.1843 -3.0321 0.0 0
M  V30 7 N 3.5116 -0.4067 0.0 0
M  V30 8 C 2.9763 -2.054 0.0 0
M  V30 9 N 4.1807 0.3364 0.0 0
M  V30 10 C 2.598 0.0 0.0 0
M  V30 11 C 3.6807 1.2024 0.0 0
M  V30 12 N 1.732 -0.5 0.0 0
M  V30 13 C 2.7026 0.9945 0.0 0
M  V30 14 C 4.0874 2.1159 0.0 0
M  V30 15 C 0.866 0.0 0.0 0
M  V30 16 O 0.866 1.0 0.0 0
M  V30 17 C 0.0 -0.5 0.0 0 CFG=2
M  V30 18 C -0.866 0.0 0.0 0
M  V30 19 C 0.0 -1.4999 0.0 0
M  V30 20 C -1.732 -0.4999 0.0 0
M  V30 21 C -0.866 -1.9999 0.0 0
M  V30 22 O -2.598 0.0 0.0 0
M  V30 23 N -1.732 -1.4999 0.0 0
M  V30 END ATOM
M  V30 BEGIN BOND
M  V30 1 1 1 2
M  V30 2 2 2 3
M  V30 3 1 2 4
M  V30 4 1 3 5
M  V30 5 2 4 6
M  V30 6 1 5 7
M  V30 7 2 5 8
M  V30 8 1 7 9
M  V30 9 1 7 10
M  V30 10 1 9 11
M  V30 11 2 10 12 CFG=2
M  V30 12 1 10 13
M  V30 13 1 11 14
M  V30 14 1 12 15
M  V30 15 2 15 16
M  V30 16 1 17 15 CFG=1
M  V30 17 1 17 18
M  V30 18 1 17 19
M  V30 19 1 18 20
M  V30 20 1 19 21
M  V30 21 2 20 22
M  V30 22 1 20 23
M  V30 23 1 6 8
M  V30 24 2 11 13
M  V30 25 1 21 23
M  V30 END BOND
M  V30 BEGIN COLLECTION
M  V30 MDLV30/STERAC1 ATOMS=(1 17)
M  V30 END COLLECTION
M  V30 END CTAB
M  END
>  <ID>
ZINC000152979101

>  <name>
NA

>  <smiles>
Cc1cc(=NC(=O)C2CCNC(=O)C2)n([nH]1)-c1cccc(Br)c1

$$$$
ZINC001657931232
Actelion Java MolfileCreator 2.0

  0  0  0  0  0  0              0 V3000
M  V30 BEGIN CTAB
M  V30 COUNTS 26 29 0 0 0
M  V30 BEGIN ATOM
M  V30 1 O 4.3301 -2.9999 0.0 0
M  V30 2 C 4.3301 -1.9999 0.0 0
M  V30 3 N 5.1961 -1.4999 0.0 0
M  V30 4 C 3.4641 -1.4999 0.0 0
M  V30 5 N 6.1472 -1.809 0.0 0
M  V30 6 C 5.1961 -0.4999 0.0 0
M  V30 7 C 3.4641 -0.5 0.0 0
M  V30 8 C 6.7349 -0.9999 0.0 0
M  V30 9 N 6.1472 -0.1909 0.0 0
M  V30 10 N 4.3301 0.0 0.0 0
M  V30 11 C 2.598 0.0 0.0 0
M  V30 12 N 7.7349 -0.9999 0.0 0
M  V30 13 N 1.732 -0.5 0.0 0
M  V30 14 C 0.866 0.0 0.0 0 CFG=2
M  V30 15 C 0.866 1.0 0.0 0
M  V30 16 C 0.0 -0.5 0.0 0
M  V30 17 C 0.0 1.4999 0.0 0
M  V30 18 C 1.732 1.5 0.0 0
M  V30 19 C 0.0 2.4999 0.0 0
M  V30 20 C 1.732 2.5 0.0 0
M  V30 21 C 0.866 3.0 0.0 0
M  V30 22 C -0.7431 3.1691 0.0 0
M  V30 23 N 0.6581 3.9781 0.0 0
M  V30 24 C -0.3364 4.0826 0.0 0
M  V30 25 C 1.3272 4.7212 0.0 0
M  V30 26 O -0.8364 4.9487 0.0 0
M  V30 END ATOM
M  V30 BEGIN BOND
M  V30 1 2 1 2
M  V30 2 1 2 3
M  V30 3 1 2 4
M  V30 4 1 3 5
M  V30 5 1 3 6
M  V30 6 2 4 7
M  V30 7 1 5 8
M  V30 8 2 6 9
M  V30 9 1 6 10
M  V30 10 1 7 11
M  V30 11 2 8 12
M  V30 12 1 11 13
M  V30 13 1 14 13 CFG=1
M  V30 14 1 14 15
M  V30 15 1 14 16
M  V30 16 2 15 17
M  V30 17 1 15 18
M  V30 18 1 17 19
M  V30 19 2 18 20
M  V30 20 2 19 21
M  V30 21 1 19 22
M  V30 22 1 21 23
M  V30 23 2 22 24
M  V30 24 1 23 25
M  V30 25 1 24 26
M  V30 26 1 7 10
M  V30 27 1 8 9
M  V30 28 1 20 21
M  V30 29 1 23 24
M  V30 END BOND
M  V30 BEGIN COLLECTION
M  V30 MDLV30/STERAC1 ATOMS=(1 14)
M  V30 END COLLECTION
M  V30 END CTAB
M  END
>  <ID>
ZINC001657931232

>  <name>
NA

>  <smiles>
CC(NCc1cc(=O)n2[nH]c(=N)nc2[nH]1)c1ccc2n(C)c(O)cc2c1

$$$$
ZINC000452260308
Actelion Java MolfileCreator 2.0

  0  0  0  0  0  0              0 V3000
M  V30 BEGIN CTAB
M  V30 COUNTS 26 28 0 0 0
M  V30 BEGIN ATOM
M  V30 1 F 3.5355 -4.5531 0.0 0
M  V30 2 C 2.5696 -4.2943 0.0 0
M  V30 3 F 2.3107 -5.2602 0.0 0
M  V30 4 F 1.6036 -4.0355 0.0 0
M  V30 5 O 2.8284 -3.3284 0.0 0
M  V30 6 C 2.1213 -2.6213 0.0 0
M  V30 7 C 2.3801 -1.6553 0.0 0
M  V30 8 C 1.1553 -2.8801 0.0 0
M  V30 9 C 1.673 -0.9482 0.0 0
M  V30 10 C 0.4482 -2.173 0.0 0
M  V30 11 C 0.7071 -1.2071 0.0 0
M  V30 12 C 0.0 -0.5 0.0 0
M  V30 13 N 0.866 0.0 0.0 0
M  V30 14 C -1.0 -0.4999 0.0 0
M  V30 15 C -0.5 -1.366 0.0 0
M  V30 16 C 0.866 0.9999 0.0 0
M  V30 17 O 1.732 1.4999 0.0 0
M  V30 18 C 0.0 1.5 0.0 0
M  V30 19 C -0.866 1.0 0.0 0
M  V30 20 C 0.0 2.4999 0.0 0
M  V30 21 C -1.732 1.5 0.0 0
M  V30 22 C -0.866 3.0 0.0 0
M  V30 23 O -2.598 1.0 0.0 0
M  V30 24 N -1.732 2.5 0.0 0
M  V30 25 C -0.866 4.0 0.0 0
M  V30 26 C 0.0 4.5 0.0 0
M  V30 END ATOM
M  V30 BEGIN BOND
M  V30 1 1 1 2
M  V30 2 1 2 3
M  V30 3 1 2 4
M  V30 4 1 2 5
M  V30 5 1 5 6
M  V30 6 2 6 7
M  V30 7 1 6 8
M  V30 8 1 7 9
M  V30 9 2 8 10
M  V30 10 2 9 11
M  V30 11 1 11 12
M  V30 12 1 12 13
M  V30 13 1 12 14
M  V30 14 1 12 15
M  V30 15 1 13 16
M  V30 16 2 16 17
M  V30 17 1 16 18
M  V30 18 1 18 19
M  V30 19 1 18 20
M  V30 20 1 19 21
M  V30 21 1 20 22
M  V30 22 2 21 23
M  V30 23 1 21 24
M  V30 24 1 22 25
M  V30 25 1 25 26
M  V30 26 1 10 11
M  V30 27 1 14 15
M  V30 28 1 22 24
M  V30 END BOND
M  V30 END CTAB
M  END
>  <ID>
ZINC000452260308

>  <name>
NA

>  <smiles>
CCC1CC(CC(=O)N1)C(=O)NC1(CC1)c1ccc(OC(F)(F)F)cc1

$$$$
ZINC000564633053
Actelion Java MolfileCreator 2.0

  0  0  0  0  0  0              0 V3000
M  V30 BEGIN CTAB
M  V30 COUNTS 25 27 0 0 0
M  V30 BEGIN ATOM
M  V30 1 O 12.9015 0.7499 0.0 0
M  V30 2 C 11.4015 0.7499 0.0 0
M  V30 3 N 10.5198 1.9635 0.0 0
M  V30 4 N 10.5198 -0.4635 0.0 0
M  V30 5 C 9.0932 1.5 0.0 0
M  V30 6 C 10.9833 3.3901 0.0 0
M  V30 7 C 9.0932 0.0 0.0 0
M  V30 8 C 10.9833 -1.8901 0.0 0
M  V30 9 C 7.7942 2.2499 0.0 0
M  V30 10 C 7.7942 -0.75 0.0 0
M  V30 11 C 6.4951 1.4999 0.0 0
M  V30 12 C 6.4951 0.0 0.0 0
M  V30 13 O 5.1961 2.25 0.0 0
M  V30 14 N 5.1961 -0.75 0.0 0
M  V30 15 C 3.8971 0.0 0.0 0
M  V30 16 O 3.8971 1.5 0.0 0
M  V30 17 C 2.598 -0.75 0.0 0
M  V30 18 C 1.299 0.0 0.0 0
M  V30 19 C 0.0 -0.75 0.0 0 CFG=2
M  V30 20 N -1.3703 -0.1398 0.0 0
M  V30 21 C -0.1567 -2.2417 0.0 0
M  V30 22 C 1.258 -1.5669 0.0 0
M  V30 23 C -2.374 -1.2546 0.0 0
M  V30 24 C -1.624 -2.5536 0.0 0
M  V30 25 O -3.8657 -1.0978 0.0 0
M  V30 END ATOM
M  V30 BEGIN BOND
M  V30 1 2 1 2
M  V30 2 1 2 3
M  V30 3 1 2 4
M  V30 4 1 3 5
M  V30 5 1 3 6
M  V30 6 1 4 7
M  V30 7 1 4 8
M  V30 8 1 5 9
M  V30 9 1 7 10
M  V30 10 2 9 11
M  V30 11 2 10 12
M  V30 12 1 11 13
M  V30 13 1 12 14
M  V30 14 1 14 15
M  V30 15 2 15 16
M  V30 16 1 15 17
M  V30 17 1 17 18
M  V30 18 1 19 18
M  V30 19 1 19 20
M  V30 20 1 19 21
M  V30 21 1 19 22 CFG=3
M  V30 22 1 20 23
M  V30 23 1 21 24
M  V30 24 2 23 25
M  V30 25 2 5 7
M  V30 26 1 11 12
M  V30 27 1 23 24
M  V30 END BOND
M  V30 BEGIN COLLECTION
M  V30 MDLV30/STERAC1 ATOMS=(1 19)
M  V30 END COLLECTION
M  V30 END CTAB
M  END
>  <ID>
ZINC000564633053

>  <name>
NA

>  <smiles>
Cn1c2cc(O)c(NC(=O)CCC3(C)CCC(=O)N3)cc2n(C)c1=O

$$$$
ZINC000621286015
Actelion Java MolfileCreator 2.0

  0  0  0  0  0  0              0 V3000
M  V30 BEGIN CTAB
M  V30 COUNTS 27 29 0 0 0
M  V30 BEGIN ATOM
M  V30 1 F 10.5932 -4.5 0.0 0
M  V30 2 C 9.0932 -4.5 0.0 0
M  V30 3 F 9.0932 -6.0 0.0 0
M  V30 4 F 7.5932 -4.5 0.0 0
M  V30 5 O 9.0932 -3.0 0.0 0
M  V30 6 C 7.7942 -2.25 0.0 0
M  V30 7 C 7.7942 -0.75 0.0 0
M  V30 8 C 6.4952 -3.0 0.0 0
M  V30 9 C 6.4952 0.0 0.0 0
M  V30 10 C 5.1961 -2.25 0.0 0
M  V30 11 C 5.1961 -0.75 0.0 0
M  V30 12 C 3.8971 0.0 0.0 0
M  V30 13 N 2.598 -0.75 0.0 0
M  V30 14 C 4.6471 1.299 0.0 0
M  V30 15 C 3.1471 1.299 0.0 0
M  V30 16 C 1.299 0.0 0.0 0
M  V30 17 C 0.0 -0.75 0.0 0
M  V30 18 N -1.299 0.0 0.0 0
M  V30 19 C 0.0 -2.25 0.0 0
M  V30 20 C -2.598 -0.75 0.0 0
M  V30 21 C -1.299 -3.0 0.0 0
M  V30 22 N -4.0246 -0.2864 0.0 0
M  V30 23 N -2.598 -2.25 0.0 0
M  V30 24 O -1.299 -4.5 0.0 0
M  V30 25 C -4.9063 -1.5 0.0 0
M  V30 26 N -4.0246 -2.7135 0.0 0
M  V30 27 N -6.4063 -1.5 0.0 0
M  V30 END ATOM
M  V30 BEGIN BOND
M  V30 1 1 1 2
M  V30 2 1 2 3
M  V30 3 1 2 4
M  V30 4 1 2 5
M  V30 5 1 5 6
M  V30 6 2 6 7
M  V30 7 1 6 8
M  V30 8 1 7 9
M  V30 9 2 8 10
M  V30 10 2 9 11
M  V30 11 1 11 12
M  V30 12 1 12 13
M  V30 13 1 12 14
M  V30 14 1 12 15
M  V30 15 1 13 16
M  V30 16 1 16 17
M  V30 17 1 17 18
M  V30 18 2 17 19
M  V30 19 1 18 20
M  V30 20 1 19 21
M  V30 21 2 20 22
M  V30 22 1 20 23
M  V30 23 2 21 24
M  V30 24 1 22 25
M  V30 25 1 23 26
M  V30 26 2 25 27
M  V30 27 1 10 11
M  V30 28 1 21 23
M  V30 29 1 25 26
M  V30 END BOND
M  V30 END CTAB
M  END
>  <ID>
ZINC000621286015

>  <name>
NA

>  <smiles>
CC(C)(NCc1cc(=O)n2[nH]c(=N)nc2[nH]1)c1ccc(OC(F)(F)F)cc1

$$$$
ZINC001063672223
Actelion Java MolfileCreator 2.0

  0  0  0  0  0  0              0 V3000
M  V30 BEGIN CTAB
M  V30 COUNTS 24 26 0 0 0
M  V30 BEGIN ATOM
M  V30 1 F 4.9535 -2.6159 0.0 0
M  V30 2 C 4.5467 -1.7024 0.0 0
M  V30 3 C 5.0467 -0.8364 0.0 0
M  V30 4 C 3.5686 -1.4945 0.0 0
M  V30 5 N 4.3776 -0.0932 0.0 0
M  V30 6 C 3.4641 -0.5 0.0 0
M  V30 7 C 2.598 0.0 0.0 0
M  V30 8 O 2.598 1.0 0.0 0
M  V30 9 N 1.732 -0.5 0.0 0
M  V30 10 C 0.866 0.0 0.0 0
M  V30 11 C 0.0 -0.5 0.0 0
M  V30 12 N 0.7933 -1.1087 0.0 0
M  V30 13 C -0.9659 -0.2411 0.0 0
M  V30 14 C -0.2588 -1.4659 0.0 0
M  V30 15 C 0.6628 -2.1002 0.0 0
M  V30 16 C -1.2247 -1.2071 0.0 0
M  V30 17 O -0.261 -2.4828 0.0 0
M  V30 18 C 1.4561 -2.7089 0.0 0 CFG=2
M  V30 19 C 1.3256 -3.7004 0.0 0
M  V30 20 C 2.38 -2.3262 0.0 0
M  V30 21 C 2.119 -4.3091 0.0 0
M  V30 22 C 3.1734 -2.935 0.0 0
M  V30 23 O 1.9884 -5.3006 0.0 0
M  V30 24 N 3.0428 -3.9264 0.0 0
M  V30 END ATOM
M  V30 BEGIN BOND
M  V30 1 1 1 2
M  V30 2 2 2 3
M  V30 3 1 2 4
M  V30 4 1 3 5
M  V30 5 2 4 6
M  V30 6 1 6 7
M  V30 7 2 7 8
M  V30 8 1 7 9
M  V30 9 1 9 10
M  V30 10 1 10 11
M  V30 11 1 11 12
M  V30 12 1 11 13
M  V30 13 1 11 14
M  V30 14 1 12 15
M  V30 15 1 13 16
M  V30 16 2 15 17
M  V30 17 1 18 15 CFG=1
M  V30 18 1 18 19
M  V30 19 1 18 20
M  V30 20 1 19 21
M  V30 21 1 20 22
M  V30 22 2 21 23
M  V30 23 1 21 24
M  V30 24 1 5 6
M  V30 25 1 14 16
M  V30 26 1 22 24
M  V30 END BOND
M  V30 BEGIN COLLECTION
M  V30 MDLV30/STERAC1 ATOMS=(1 18)
M  V30 END COLLECTION
M  V30 END CTAB
M  END
>  <ID>
ZINC001063672223

>  <name>
NA

>  <smiles>
Fc1c[nH]c(c1)C(=O)NCC1(CCC1)NC(=O)C1CCNC(=O)C1

$$$$
ZINC000348735986
Actelion Java MolfileCreator 2.0

  0  0  0  0  0  0              0 V3000
M  V30 BEGIN CTAB
M  V30 COUNTS 24 26 0 0 0
M  V30 BEGIN ATOM
M  V30 1 F 4.3432 -4.3193 0.0 0
M  V30 2 C 4.1353 -3.3411 0.0 0
M  V30 3 C 4.8785 -2.672 0.0 0
M  V30 4 C 3.1843 -3.0321 0.0 0
M  V30 5 C 4.6705 -1.6939 0.0 0
M  V30 6 C 2.9763 -2.054 0.0 0
M  V30 7 C 3.7195 -1.3848 0.0 0
M  V30 8 N 3.5116 -0.4067 0.0 0
M  V30 9 N 4.1807 0.3364 0.0 0
M  V30 10 C 2.598 0.0 0.0 0
M  V30 11 C 3.6807 1.2024 0.0 0
M  V30 12 N 1.732 -0.5 0.0 0
M  V30 13 C 2.7026 0.9945 0.0 0
M  V30 14 C 4.0874 2.1159 0.0 0
M  V30 15 C 0.866 0.0 0.0 0
M  V30 16 O 0.866 1.0 0.0 0
M  V30 17 C 0.0 -0.5 0.0 0
M  V30 18 C -0.866 0.0 0.0 0
M  V30 19 C 0.0 -1.4999 0.0 0
M  V30 20 C -1.732 -0.4999 0.0 0
M  V30 21 C -0.866 -1.9999 0.0 0
M  V30 22 O -2.598 0.0 0.0 0
M  V30 23 N -1.732 -1.4999 0.0 0
M  V30 24 C -0.866 -2.9999 0.0 0
M  V30 END ATOM
M  V30 BEGIN BOND
M  V30 1 1 1 2
M  V30 2 2 2 3
M  V30 3 1 2 4
M  V30 4 1 3 5
M  V30 5 2 4 6
M  V30 6 2 5 7
M  V30 7 1 7 8
M  V30 8 1 8 9
M  V30 9 1 8 10
M  V30 10 1 9 11
M  V30 11 2 10 12 CFG=2
M  V30 12 1 10 13
M  V30 13 1 11 14
M  V30 14 1 12 15
M  V30 15 2 15 16
M  V30 16 1 15 17
M  V30 17 1 17 18
M  V30 18 1 17 19
M  V30 19 1 18 20
M  V30 20 1 19 21
M  V30 21 2 20 22
M  V30 22 1 20 23
M  V30 23 1 21 24
M  V30 24 1 6 7
M  V30 25 2 11 13
M  V30 26 1 21 23
M  V30 END BOND
M  V30 END CTAB
M  END
>  <ID>
ZINC000348735986

>  <name>
NA

>  <smiles>
CC1CC(CC(=O)N1)C(=O)N=c1cc(C)[nH]n1-c1ccc(F)cc1

$$$$
ZINC000542654024
Actelion Java MolfileCreator 2.0

  0  0  0  0  0  0              0 V3000
M  V30 BEGIN CTAB
M  V30 COUNTS 26 27 0 0 0
M  V30 BEGIN ATOM
M  V30 1 O 4.3301 -2.9999 0.0 0
M  V30 2 C 4.3301 -1.9999 0.0 0
M  V30 3 N 5.1961 -1.5 0.0 0
M  V30 4 C 3.4641 -1.5 0.0 0
M  V30 5 C 5.1961 -0.5 0.0 0
M  V30 6 C 3.4641 -0.5 0.0 0
M  V30 7 C 4.3301 0.0 0.0 0
M  V30 8 C 6.0621 0.0 0.0 0
M  V30 9 C 2.598 0.0 0.0 0
M  V30 10 C 6.0621 0.9999 0.0 0
M  V30 11 O 2.598 1.0 0.0 0
M  V30 12 N 1.732 -0.5 0.0 0
M  V30 13 C 0.866 0.0 0.0 0
M  V30 14 C 0.866 1.0 0.0 0
M  V30 15 C 0.0 -0.5 0.0 0
M  V30 16 C 1.732 1.5 0.0 0
M  V30 17 C 0.0 1.4999 0.0 0
M  V30 18 C 1.732 2.4999 0.0 0
M  V30 19 C 0.0 2.4999 0.0 0
M  V30 20 O 2.598 2.9999 0.0 0
M  V30 21 C 0.866 2.9999 0.0 0
M  V30 22 C 2.598 3.9999 0.0 0
M  V30 23 O 0.866 3.9999 0.0 0
M  V30 24 C 0.0 4.5 0.0 0
M  V30 25 C 0.0 5.4999 0.0 0
M  V30 26 O -0.866 5.9999 0.0 0
M  V30 END ATOM
M  V30 BEGIN BOND
M  V30 1 2 1 2
M  V30 2 1 2 3
M  V30 3 1 2 4
M  V30 4 1 3 5
M  V30 5 1 4 6
M  V30 6 1 5 7
M  V30 7 1 5 8
M  V30 8 1 6 9
M  V30 9 1 8 10
M  V30 10 2 9 11
M  V30 11 1 9 12
M  V30 12 1 12 13
M  V30 13 1 13 14
M  V30 14 1 13 15
M  V30 15 2 14 16
M  V30 16 1 14 17
M  V30 17 1 16 18
M  V30 18 2 17 19
M  V30 19 1 18 20
M  V30 20 2 18 21
M  V30 21 1 20 22
M  V30 22 1 21 23
M  V30 23 1 23 24
M  V30 24 1 24 25
M  V30 25 1 25 26
M  V30 26 1 6 7
M  V30 27 1 19 21
M  V30 END BOND
M  V30 END CTAB
M  END
>  <ID>
ZINC000542654024

>  <name>
NA

>  <smiles>
CCC1CC(CC(=O)N1)C(=O)NC(C)c1ccc(OCCO)c(OC)c1

$$$$
ZINC000680345155
Actelion Java MolfileCreator 2.0

  0  0  0  0  0  0              0 V3000
M  V30 BEGIN CTAB
M  V30 COUNTS 24 26 0 0 0
M  V30 BEGIN ATOM
M  V30 1 O 7.7942 -0.75 0.0 0
M  V30 2 C 6.4951 0.0 0.0 0
M  V30 3 N 6.4951 1.5 0.0 0
M  V30 4 C 5.1961 -0.7499 0.0 0
M  V30 5 C 5.1961 2.25 0.0 0
M  V30 6 C 3.8971 0.0 0.0 0
M  V30 7 C 3.8971 1.5 0.0 0
M  V30 8 C 5.1961 3.75 0.0 0
M  V30 9 C 2.598 -0.75 0.0 0
M  V30 10 C 3.8971 4.5 0.0 0
M  V30 11 O 2.598 -2.25 0.0 0
M  V30 12 N 1.299 0.0 0.0 0
M  V30 13 C 0.0 -0.75 0.0 0
M  V30 14 N -1.3703 -0.1398 0.0 0
M  V30 15 N -0.1567 -2.2417 0.0 0
M  V30 16 N -2.374 -1.2546 0.0 0
M  V30 17 C -1.6821 1.3273 0.0 0
M  V30 18 C -1.624 -2.5536 0.0 0
M  V30 19 C -0.5674 2.331 0.0 0
M  V30 20 C -3.1087 1.7908 0.0 0
M  V30 21 C -2.2341 -3.9239 0.0 0
M  V30 22 C -0.8793 3.7982 0.0 0
M  V30 23 C -3.4206 3.258 0.0 0
M  V30 24 C -2.3059 4.2617 0.0 0
M  V30 END ATOM
M  V30 BEGIN BOND
M  V30 1 2 1 2
M  V30 2 1 2 3
M  V30 3 1 2 4
M  V30 4 1 3 5
M  V30 5 1 4 6
M  V30 6 1 5 7
M  V30 7 1 5 8
M  V30 8 1 6 9
M  V30 9 1 8 10
M  V30 10 2 9 11
M  V30 11 1 9 12
M  V30 12 2 12 13 CFG=2
M  V30 13 1 13 14
M  V30 14 1 13 15
M  V30 15 1 14 16
M  V30 16 1 14 17
M  V30 17 1 15 18
M  V30 18 2 17 19
M  V30 19 1 17 20
M  V30 20 1 18 21
M  V30 21 1 19 22
M  V30 22 2 20 23
M  V30 23 2 22 24
M  V30 24 1 6 7
M  V30 25 2 16 18
M  V30 26 1 23 24
M  V30 END BOND
M  V30 END CTAB
M  END
>  <ID>
ZINC000680345155

>  <name>
NA

>  <smiles>
CCC1CC(CC(=O)N1)C(=O)N=c1[nH]c(C)nn1-c1ccccc1

$$$$
ZINC001082948192
Actelion Java MolfileCreator 2.0

  0  0  0  0  0  0              0 V3000
M  V30 BEGIN CTAB
M  V30 COUNTS 26 28 0 0 0
M  V30 BEGIN ATOM
M  V30 1 O 7.3033 3.5477 0.0 0
M  V30 2 C 6.5601 2.8786 0.0 0
M  V30 3 N 5.582 3.0865 0.0 0
M  V30 4 N 6.6646 1.884 0.0 0
M  V30 5 C 5.082 2.2205 0.0 0
M  V30 6 C 5.1752 4.0 0.0 0
M  V30 7 C 5.7511 1.4773 0.0 0
M  V30 8 C 7.5307 1.384 0.0 0
M  V30 9 C 4.0874 2.1159 0.0 0
M  V30 10 O 3.4997 2.9249 0.0 0
M  V30 11 N 3.6807 1.2024 0.0 0
M  V30 12 C 2.7026 0.9945 0.0 0
M  V30 13 C 4.1807 0.3364 0.0 0
M  V30 14 C 2.598 0.0 0.0 0
M  V30 15 C 3.5116 -0.4067 0.0 0
M  V30 16 N 1.732 -0.5 0.0 0
M  V30 17 C 3.7195 -1.3848 0.0 0
M  V30 18 C 0.866 0.0 0.0 0
M  V30 19 C 0.0 -0.5 0.0 0
M  V30 20 C -0.866 0.0 0.0 0
M  V30 21 C 0.0 -1.4999 0.0 0
M  V30 22 C -1.732 -0.4999 0.0 0
M  V30 23 C -0.866 -1.9999 0.0 0
M  V30 24 C -1.732 -1.4999 0.0 0
M  V30 25 C -2.598 -1.9999 0.0 0
M  V30 26 O -2.598 -2.9999 0.0 0
M  V30 END ATOM
M  V30 BEGIN BOND
M  V30 1 2 1 2
M  V30 2 1 2 3
M  V30 3 1 2 4
M  V30 4 1 3 5
M  V30 5 1 3 6
M  V30 6 1 4 7
M  V30 7 1 4 8
M  V30 8 1 5 9
M  V30 9 2 9 10
M  V30 10 1 9 11
M  V30 11 1 11 12
M  V30 12 1 11 13
M  V30 13 1 12 14
M  V30 14 1 13 15
M  V30 15 1 14 16
M  V30 16 1 15 17
M  V30 17 1 16 18
M  V30 18 1 18 19
M  V30 19 2 19 20
M  V30 20 1 19 21
M  V30 21 1 20 22
M  V30 22 2 21 23
M  V30 23 2 22 24
M  V30 24 1 24 25
M  V30 25 1 25 26
M  V30 26 2 5 7
M  V30 27 1 14 15
M  V30 28 1 23 24
M  V30 END BOND
M  V30 END CTAB
M  END
>  <ID>
ZINC001082948192

>  <name>
NA

>  <smiles>
CC1CN(CC1NCc1ccc(CO)cc1)C(=O)c1cn(C)c(=O)n1C

$$$$
ZINC001120895954
Actelion Java MolfileCreator 2.0

  0  0  0  0  0  0              0 V3000
M  V30 BEGIN CTAB
M  V30 COUNTS 25 27 0 0 0
M  V30 BEGIN ATOM
M  V30 1 O 5.1961 -0.5 0.0 0
M  V30 2 C 4.3301 0.0 0.0 0
M  V30 3 N 3.4641 -0.5 0.0 0
M  V30 4 N 4.3301 1.0 0.0 0
M  V30 5 C 2.598 0.0 0.0 0
M  V30 6 O 2.598 1.0 0.0 0
M  V30 7 C 1.732 -0.5 0.0 0
M  V30 8 N 0.866 0.0 0.0 0
M  V30 9 C 0.0 -0.5 0.0 0
M  V30 10 C -0.9659 -0.2411 0.0 0
M  V30 11 C -0.2588 -1.4659 0.0 0
M  V30 12 C -1.2247 -1.2071 0.0 0
M  V30 13 C -2.1906 -0.9482 0.0 0
M  V30 14 C -1.4835 -2.173 0.0 0
M  V30 15 C -2.4494 -1.9142 0.0 0
M  V30 16 N -3.3155 -2.4142 0.0 0
M  V30 17 C -4.1815 -1.9142 0.0 0
M  V30 18 O -4.1815 -0.9142 0.0 0
M  V30 19 C -5.0475 -2.4142 0.0 0
M  V30 20 N -5.9611 -2.0074 0.0 0
M  V30 21 C -5.152 -3.4087 0.0 0
M  V30 22 C -6.6302 -2.7506 0.0 0
M  V30 23 C -6.1302 -3.6166 0.0 0
M  V30 24 C -6.5369 -4.5301 0.0 0
M  V30 25 N -6.9437 -5.4437 0.0 0
M  V30 END ATOM
M  V30 BEGIN BOND
M  V30 1 2 1 2
M  V30 2 1 2 3
M  V30 3 1 2 4
M  V30 4 1 3 5
M  V30 5 2 5 6
M  V30 6 1 5 7
M  V30 7 1 7 8
M  V30 8 1 8 9
M  V30 9 1 9 10
M  V30 10 1 9 11
M  V30 11 1 10 12
M  V30 12 1 12 13
M  V30 13 1 12 14
M  V30 14 1 13 15
M  V30 15 1 15 16
M  V30 16 1 16 17
M  V30 17 2 17 18
M  V30 18 1 17 19
M  V30 19 1 19 20
M  V30 20 2 19 21
M  V30 21 1 20 22
M  V30 22 1 21 23
M  V30 23 1 23 24
M  V30 24 3 24 25
M  V30 25 1 11 12
M  V30 26 1 14 15
M  V30 27 2 22 23
M  V30 END BOND
M  V30 END CTAB
M  END
>  <ID>
ZINC001120895954

>  <name>
NA

>  <smiles>
NC(=O)NC(=O)CNC1CC2(C1)CC(C2)NC(=O)c1cc(c[nH]1)C#N

$$$$
ZINC001221348063
Actelion Java MolfileCreator 2.0

  0  0  0  0  0  0              0 V3000
M  V30 BEGIN CTAB
M  V30 COUNTS 26 28 0 0 0
M  V30 BEGIN ATOM
M  V30 1 O 5.1961 -2.25 0.0 0
M  V30 2 C 5.1961 -0.75 0.0 0
M  V30 3 N 3.8971 0.0 0.0 0
M  V30 4 C 6.4951 0.0 0.0 0
M  V30 5 C 2.598 -0.75 0.0 0
M  V30 6 N 6.6519 1.4917 0.0 0
M  V30 7 C 7.8655 -0.6101 0.0 0
M  V30 8 C 2.598 -2.25 0.0 0
M  V30 9 C 1.299 0.0 0.0 0
M  V30 10 C 8.1192 1.8036 0.0 0
M  V30 11 C 8.8692 0.5046 0.0 0
M  V30 12 O 3.8971 -2.9999 0.0 0
M  V30 13 N 1.299 -3.0 0.0 0
M  V30 14 C 1.299 1.4999 0.0 0
M  V30 15 O 10.3609 0.3478 0.0 0
M  V30 16 C 1.1422 -4.4917 0.0 0
M  V30 17 C -0.0712 -2.3898 0.0 0
M  V30 18 N 0.0855 2.3816 0.0 0
M  V30 19 C 2.5125 2.3816 0.0 0
M  V30 20 C 2.2569 -5.4954 0.0 0
M  V30 21 C -0.3249 -4.8036 0.0 0
M  V30 22 C -1.0749 -3.5046 0.0 0
M  V30 23 C 0.549 3.8082 0.0 0
M  V30 24 N 2.049 3.8082 0.0 0
M  V30 25 O 3.6835 -5.0319 0.0 0
M  V30 26 N 1.945 -6.9627 0.0 0
M  V30 END ATOM
M  V30 BEGIN BOND
M  V30 1 2 1 2
M  V30 2 1 2 3
M  V30 3 1 2 4
M  V30 4 1 3 5
M  V30 5 1 4 6
M  V30 6 1 4 7
M  V30 7 1 5 8
M  V30 8 1 5 9
M  V30 9 1 6 10
M  V30 10 1 7 11
M  V30 11 2 8 12
M  V30 12 1 8 13
M  V30 13 1 9 14
M  V30 14 1 11 15
M  V30 15 1 13 16
M  V30 16 1 13 17
M  V30 17 1 14 18
M  V30 18 2 14 19
M  V30 19 1 16 20
M  V30 20 1 16 21
M  V30 21 1 17 22
M  V30 22 2 18 23
M  V30 23 1 19 24
M  V30 24 2 20 25
M  V30 25 1 20 26
M  V30 26 1 10 11
M  V30 27 1 21 22
M  V30 28 1 23 24
M  V30 END BOND
M  V30 END CTAB
M  END
>  <ID>
ZINC001221348063

>  <name>
NA

>  <smiles>
NC(=O)C1CCCN1C(=O)C(Cc1c[nH]cn1)NC(=O)C1CC(O)CN1

$$$$
ZINC000542648459
Actelion Java MolfileCreator 2.0

  0  0  0  0  0  0              0 V3000
M  V30 BEGIN CTAB
M  V30 COUNTS 24 26 0 0 0
M  V30 BEGIN ATOM
M  V30 1 F -0.157 -3.7458 0.0 0
M  V30 2 C 1.1795 -3.0649 0.0 0
M  V30 3 C 1.258 -1.5669 0.0 0
M  V30 4 C 2.4375 -3.8818 0.0 0
M  V30 5 C 2.5945 -0.8859 0.0 0
M  V30 6 C 0.0 -0.75 0.0 0
M  V30 7 C 3.774 -3.2008 0.0 0
M  V30 8 C 3.8525 -1.7029 0.0 0
M  V30 9 N 1.299 0.0 0.0 0
M  V30 10 C -1.3703 -0.1398 0.0 0
M  V30 11 C -0.1567 -2.2417 0.0 0
M  V30 12 F 5.032 -4.0178 0.0 0
M  V30 13 C 1.299 1.4999 0.0 0
M  V30 14 C -2.374 -1.2546 0.0 0
M  V30 15 C -1.624 -2.5536 0.0 0
M  V30 16 O 2.598 2.2499 0.0 0
M  V30 17 C 0.0 2.25 0.0 0
M  V30 18 C -1.299 1.5 0.0 0
M  V30 19 C 0.0 3.75 0.0 0
M  V30 20 C -2.598 2.25 0.0 0
M  V30 21 C -1.299 4.5 0.0 0
M  V30 22 O -3.8971 1.5 0.0 0
M  V30 23 N -2.598 3.75 0.0 0
M  V30 24 C -1.299 6.0 0.0 0
M  V30 END ATOM
M  V30 BEGIN BOND
M  V30 1 1 1 2
M  V30 2 2 2 3
M  V30 3 1 2 4
M  V30 4 1 3 5
M  V30 5 1 3 6
M  V30 6 2 4 7
M  V30 7 2 5 8
M  V30 8 1 6 9
M  V30 9 1 6 10
M  V30 10 1 6 11
M  V30 11 1 7 12
M  V30 12 1 9 13
M  V30 13 1 10 14
M  V30 14 1 11 15
M  V30 15 2 13 16
M  V30 16 1 13 17
M  V30 17 1 17 18
M  V30 18 1 17 19
M  V30 19 1 18 20
M  V30 20 1 19 21
M  V30 21 2 20 22
M  V30 22 1 20 23
M  V30 23 1 21 24
M  V30 24 1 7 8
M  V30 25 1 14 15
M  V30 26 1 21 23
M  V30 END BOND
M  V30 END CTAB
M  END
>  <ID>
ZINC000542648459

>  <name>
NA

>  <smiles>
CC1CC(CC(=O)N1)C(=O)NC1(CCCC1)c1ccc(F)cc1F

$$$$
ZINC000418171491
Actelion Java MolfileCreator 2.0

  0  0  0  0  0  0              0 V3000
M  V30 BEGIN CTAB
M  V30 COUNTS 26 28 0 0 0
M  V30 BEGIN ATOM
M  V30 1 F 2.638 2.4581 0.0 0
M  V30 2 C 3.3071 3.2012 0.0 0
M  V30 3 F 2.564 3.8704 0.0 0
M  V30 4 F 3.9763 3.9444 0.0 0
M  V30 5 C 4.0503 2.5321 0.0 0
M  V30 6 C 3.8424 1.554 0.0 0
M  V30 7 C 5.0013 2.8411 0.0 0
M  V30 8 C 4.5855 0.8848 0.0 0
M  V30 9 C 5.7445 2.172 0.0 0
M  V30 10 C 5.5366 1.1939 0.0 0
M  V30 11 C 4.3776 -0.0932 0.0 0
M  V30 12 C 3.4641 -0.5 0.0 0
M  V30 13 C 5.0467 -0.8364 0.0 0
M  V30 14 N 2.598 0.0 0.0 0
M  V30 15 C 3.5686 -1.4945 0.0 0
M  V30 16 C 4.5467 -1.7024 0.0 0
M  V30 17 C 1.732 -0.5 0.0 0
M  V30 18 O 1.732 -1.5 0.0 0
M  V30 19 N 0.866 0.0 0.0 0
M  V30 20 C 0.0 -0.5 0.0 0
M  V30 21 C -0.866 0.0 0.0 0
M  V30 22 C 0.0 -1.4999 0.0 0
M  V30 23 C -1.732 -0.4999 0.0 0
M  V30 24 C -0.866 -1.9999 0.0 0
M  V30 25 C -1.732 -1.4999 0.0 0
M  V30 26 N -2.598 -1.9999 0.0 0
M  V30 END ATOM
M  V30 BEGIN BOND
M  V30 1 1 1 2
M  V30 2 1 2 3
M  V30 3 1 2 4
M  V30 4 1 2 5
M  V30 5 2 5 6
M  V30 6 1 5 7
M  V30 7 1 6 8
M  V30 8 2 7 9
M  V30 9 2 8 10
M  V30 10 1 8 11
M  V30 11 1 11 12
M  V30 12 1 11 13
M  V30 13 1 12 14
M  V30 14 1 12 15
M  V30 15 1 13 16
M  V30 16 1 14 17
M  V30 17 2 17 18
M  V30 18 1 17 19
M  V30 19 1 19 20
M  V30 20 1 20 21
M  V30 21 1 20 22
M  V30 22 1 21 23
M  V30 23 1 22 24
M  V30 24 1 23 25
M  V30 25 1 25 26
M  V30 26 1 9 10
M  V30 27 1 15 16
M  V30 28 1 24 25
M  V30 END BOND
M  V30 END CTAB
M  END
>  <ID>
ZINC000418171491

>  <name>
NA

>  <smiles>
NC1CCC(CC1)NC(=O)NC1CCCC1c1cccc(c1)C(F)(F)F

$$$$
ZINC001363793980
Actelion Java MolfileCreator 2.0

  0  0  0  0  0  0              0 V3000
M  V30 BEGIN CTAB
M  V30 COUNTS 21 23 0 0 0
M  V30 BEGIN ATOM
M  V30 1 F 2.598 -0.75 0.0 0
M  V30 2 C 1.299 0.0 0.0 0
M  V30 3 F 1.299 1.5 0.0 0
M  V30 4 C 0.0 -0.75 0.0 0 CFG=1
M  V30 5 O 1.258 -1.5669 0.0 0
M  V30 6 C -1.3703 -0.1398 0.0 0
M  V30 7 C -0.1567 -2.2417 0.0 0
M  V30 8 N -2.374 -1.2546 0.0 0
M  V30 9 C -1.624 -2.5536 0.0 0
M  V30 10 C -3.8657 -1.0978 0.0 0
M  V30 11 C -4.7474 -2.3113 0.0 0
M  V30 12 N -6.2392 -2.1545 0.0 0
M  V30 13 C -4.1373 -3.6816 0.0 0
M  V30 14 C -7.1209 -3.368 0.0 0
M  V30 15 C -5.019 -4.8951 0.0 0
M  V30 16 N -8.6127 -3.5248 0.0 0
M  V30 17 N -6.5108 -4.7383 0.0 0
M  V30 18 O -4.4089 -6.2655 0.0 0
M  V30 19 C -8.9245 -4.992 0.0 0
M  V30 20 N -7.6255 -5.742 0.0 0
M  V30 21 N -10.2949 -5.6021 0.0 0
M  V30 END ATOM
M  V30 BEGIN BOND
M  V30 1 1 1 2
M  V30 2 1 2 3
M  V30 3 1 4 2
M  V30 4 1 4 5 CFG=1
M  V30 5 1 4 6
M  V30 6 1 4 7
M  V30 7 1 6 8
M  V30 8 1 7 9
M  V30 9 1 8 10
M  V30 10 1 10 11
M  V30 11 1 11 12
M  V30 12 2 11 13
M  V30 13 1 12 14
M  V30 14 1 13 15
M  V30 15 2 14 16
M  V30 16 1 14 17
M  V30 17 2 15 18
M  V30 18 1 16 19
M  V30 19 1 17 20
M  V30 20 2 19 21
M  V30 21 1 8 9
M  V30 22 1 15 17
M  V30 23 1 19 20
M  V30 END BOND
M  V30 BEGIN COLLECTION
M  V30 MDLV30/STERAC1 ATOMS=(1 4)
M  V30 END COLLECTION
M  V30 END CTAB
M  END
>  <ID>
ZINC001363793980

>  <name>
NA

>  <smiles>
OC1(CCN(Cc2cc(=O)n3[nH]c(=N)nc3[nH]2)C1)C(F)F

$$$$
ZINC000239352721
Actelion Java MolfileCreator 2.0

  0  0  0  0  0  0              0 V3000
M  V30 BEGIN CTAB
M  V30 COUNTS 26 29 0 0 0
M  V30 BEGIN ATOM
M  V30 1 O 7.7942 -0.75 0.0 0
M  V30 2 C 6.4951 0.0 0.0 0
M  V30 3 N 6.4951 1.5 0.0 0
M  V30 4 C 5.1961 -0.7499 0.0 0
M  V30 5 C 5.1961 2.25 0.0 0
M  V30 6 C 3.8971 0.0 0.0 0
M  V30 7 C 3.8971 1.5 0.0 0
M  V30 8 C 5.1961 3.75 0.0 0
M  V30 9 C 2.598 -0.75 0.0 0
M  V30 10 C 2.598 2.25 0.0 0
M  V30 11 C 3.8971 4.5 0.0 0
M  V30 12 O 2.598 -2.25 0.0 0
M  V30 13 N 1.299 0.0 0.0 0
M  V30 14 C 2.598 3.7499 0.0 0
M  V30 15 C 0.0 -0.75 0.0 0
M  V30 16 C -1.3703 -0.1398 0.0 0
M  V30 17 C -0.1567 -2.2417 0.0 0
M  V30 18 C -2.374 -1.2546 0.0 0
M  V30 19 C -1.6821 1.3273 0.0 0
M  V30 20 C -1.624 -2.5536 0.0 0
M  V30 21 C -3.1087 1.7908 0.0 0
M  V30 22 C -3.4206 3.258 0.0 0
M  V30 23 C -4.2234 0.7871 0.0 0
M  V30 24 C -4.8472 3.7215 0.0 0
M  V30 25 C -5.65 1.2506 0.0 0
M  V30 26 C -5.9619 2.7179 0.0 0
M  V30 END ATOM
M  V30 BEGIN BOND
M  V30 1 2 1 2
M  V30 2 1 2 3
M  V30 3 1 2 4
M  V30 4 1 3 5
M  V30 5 2 4 6
M  V30 6 2 5 7
M  V30 7 1 5 8
M  V30 8 1 6 9
M  V30 9 1 7 10
M  V30 10 2 8 11
M  V30 11 1 9 12
M  V30 12 1 9 13
M  V30 13 2 10 14
M  V30 14 1 13 15
M  V30 15 1 15 16
M  V30 16 1 15 17
M  V30 17 1 16 18
M  V30 18 1 16 19
M  V30 19 1 17 20
M  V30 20 1 19 21
M  V30 21 2 21 22
M  V30 22 1 21 23
M  V30 23 1 22 24
M  V30 24 2 23 25
M  V30 25 2 24 26
M  V30 26 1 6 7
M  V30 27 1 11 14
M  V30 28 1 18 20
M  V30 29 1 25 26
M  V30 END BOND
M  V30 END CTAB
M  END
>  <ID>
ZINC000239352721

>  <name>
NA

>  <smiles>
OC(NC1CCCC1Cc1ccccc1)c1cc(=O)[nH]c2ccccc12

$$$$
ZINC001644641478
Actelion Java MolfileCreator 2.0

  0  0  0  0  0  0              0 V3000
M  V30 BEGIN CTAB
M  V30 COUNTS 26 29 0 0 0
M  V30 BEGIN ATOM
M  V30 1 O 9.0932 0.0 0.0 0
M  V30 2 C 7.7942 -0.7499 0.0 0
M  V30 3 N 7.7942 -2.2499 0.0 0
M  V30 4 C 6.4951 0.0 0.0 0
M  V30 5 N 8.9089 -3.2536 0.0 0
M  V30 6 C 6.4951 -2.9999 0.0 0
M  V30 7 C 5.1961 -0.75 0.0 0
M  V30 8 C 8.2988 -4.624 0.0 0
M  V30 9 N 6.807 -4.4672 0.0 0
M  V30 10 N 5.1961 -2.25 0.0 0
M  V30 11 C 3.8971 0.0 0.0 0
M  V30 12 N 9.0488 -5.923 0.0 0
M  V30 13 N 2.598 -0.75 0.0 0
M  V30 14 C 2.598 -2.25 0.0 0
M  V30 15 C 1.299 0.0 0.0 0
M  V30 16 C 1.299 -3.0 0.0 0
M  V30 17 C 1.299 1.4999 0.0 0
M  V30 18 C 1.299 -4.5 0.0 0
M  V30 19 C 0.0 -2.25 0.0 0
M  V30 20 N 0.0855 2.3816 0.0 0
M  V30 21 C 2.5125 2.3816 0.0 0
M  V30 22 C 0.0 -5.25 0.0 0
M  V30 23 C -1.299 -3.0 0.0 0
M  V30 24 N 0.549 3.8082 0.0 0
M  V30 25 C 2.049 3.8082 0.0 0
M  V30 26 C -1.299 -4.5 0.0 0
M  V30 END ATOM
M  V30 BEGIN BOND
M  V30 1 2 1 2
M  V30 2 1 2 3
M  V30 3 1 2 4
M  V30 4 1 3 5
M  V30 5 1 3 6
M  V30 6 2 4 7
M  V30 7 1 5 8
M  V30 8 2 6 9
M  V30 9 1 6 10
M  V30 10 1 7 11
M  V30 11 2 8 12
M  V30 12 1 11 13
M  V30 13 1 13 14
M  V30 14 1 13 15
M  V30 15 1 14 16
M  V30 16 1 15 17
M  V30 17 2 16 18
M  V30 18 1 16 19
M  V30 19 2 17 20
M  V30 20 1 17 21
M  V30 21 1 18 22
M  V30 22 2 19 23
M  V30 23 1 20 24
M  V30 24 2 21 25
M  V30 25 2 22 26
M  V30 26 1 7 10
M  V30 27 1 8 9
M  V30 28 1 23 26
M  V30 29 1 24 25
M  V30 END BOND
M  V30 END CTAB
M  END
>  <ID>
ZINC001644641478

>  <name>
NA

>  <smiles>
N=c1nc2[nH]c(CN(Cc3cc[nH]n3)Cc3ccccc3)cc(=O)n2[nH]1

$$$$
ZINC001495146430
Actelion Java MolfileCreator 2.0

  0  0  0  0  0  0              0 V3000
M  V30 BEGIN CTAB
M  V30 COUNTS 25 27 0 0 0
M  V30 BEGIN ATOM
M  V30 1 O 4.2456 -2.2245 0.0 0
M  V30 2 C 3.3546 -2.6785 0.0 0
M  V30 3 N 3.3023 -3.6771 0.0 0
M  V30 4 C 2.516 -2.1339 0.0 0
M  V30 5 C 2.4113 -4.1311 0.0 0
M  V30 6 C 1.625 -2.5879 0.0 0 CFG=2
M  V30 7 C 1.5726 -3.5865 0.0 0
M  V30 8 C 0.7863 -2.0432 0.0 0
M  V30 9 O -0.1046 -2.4972 0.0 0
M  V30 10 N 0.8386 -1.0446 0.0 0
M  V30 11 C 0.0 -0.5 0.0 0
M  V30 12 C -0.9135 -0.0932 0.0 0
M  V30 13 C -0.1045 -1.4945 0.0 0
M  V30 14 C 0.866 0.0 0.0 0
M  V30 15 C -1.5826 -0.8364 0.0 0
M  V30 16 C -1.0826 -1.7024 0.0 0
M  V30 17 N 0.866 0.9999 0.0 0
M  V30 18 C 1.732 1.4999 0.0 0
M  V30 19 C 1.732 2.4999 0.0 0
M  V30 20 C 0.866 3.0 0.0 0
M  V30 21 C 2.598 2.9999 0.0 0
M  V30 22 C 0.866 3.9999 0.0 0
M  V30 23 C 0.0 2.4999 0.0 0
M  V30 24 C 2.598 3.9999 0.0 0
M  V30 25 C 1.732 4.4999 0.0 0
M  V30 END ATOM
M  V30 BEGIN BOND
M  V30 1 2 1 2
M  V30 2 1 2 3
M  V30 3 1 2 4
M  V30 4 1 3 5
M  V30 5 1 6 4
M  V30 6 1 5 7
M  V30 7 1 6 8 CFG=3
M  V30 8 2 8 9
M  V30 9 1 8 10
M  V30 10 1 10 11
M  V30 11 1 11 12
M  V30 12 1 11 13
M  V30 13 1 11 14
M  V30 14 1 12 15
M  V30 15 1 13 16
M  V30 16 1 14 17
M  V30 17 1 17 18
M  V30 18 1 18 19
M  V30 19 2 19 20
M  V30 20 1 19 21
M  V30 21 1 20 22
M  V30 22 1 20 23
M  V30 23 2 21 24
M  V30 24 2 22 25
M  V30 25 1 6 7
M  V30 26 1 15 16
M  V30 27 1 24 25
M  V30 END BOND
M  V30 BEGIN COLLECTION
M  V30 MDLV30/STERAC1 ATOMS=(1 6)
M  V30 END COLLECTION
M  V30 END CTAB
M  END
>  <ID>
ZINC001495146430

>  <name>
NA

>  <smiles>
Cc1ccccc1CNCC1(CCCC1)NC(=O)C1CCNC(=O)C1

$$$$
ZINC000329653886
Actelion Java MolfileCreator 2.0

  0  0  0  0  0  0              0 V3000
M  V30 BEGIN CTAB
M  V30 COUNTS 23 25 0 0 0
M  V30 BEGIN ATOM
M  V30 1 O 5.1961 -0.5 0.0 0
M  V30 2 C 4.3301 0.0 0.0 0
M  V30 3 N 4.3301 1.0 0.0 0
M  V30 4 C 3.4641 -0.4999 0.0 0
M  V30 5 C 3.4641 1.5 0.0 0
M  V30 6 C 2.598 0.0 0.0 0
M  V30 7 C 2.598 1.0 0.0 0
M  V30 8 C 3.4641 2.5 0.0 0
M  V30 9 C 1.732 -0.5 0.0 0
M  V30 10 O 1.732 -1.5 0.0 0
M  V30 11 N 0.866 0.0 0.0 0
M  V30 12 C 0.0 -0.5 0.0 0
M  V30 13 C -0.9135 -0.0932 0.0 0
M  V30 14 C -0.1045 -1.4945 0.0 0
M  V30 15 N -1.5826 -0.8364 0.0 0
M  V30 16 C -1.1214 0.8848 0.0 0
M  V30 17 N -1.0826 -1.7024 0.0 0
M  V30 18 C -0.3783 1.554 0.0 0
M  V30 19 C -2.0725 1.1939 0.0 0
M  V30 20 C -1.4894 -2.6159 0.0 0
M  V30 21 C -0.5862 2.5321 0.0 0
M  V30 22 C -2.2804 2.172 0.0 0
M  V30 23 C -1.5372 2.8411 0.0 0
M  V30 END ATOM
M  V30 BEGIN BOND
M  V30 1 2 1 2
M  V30 2 1 2 3
M  V30 3 1 2 4
M  V30 4 1 3 5
M  V30 5 1 4 6
M  V30 6 1 5 7
M  V30 7 1 5 8
M  V30 8 1 6 9
M  V30 9 2 9 10
M  V30 10 1 9 11
M  V30 11 1 11 12
M  V30 12 1 12 13
M  V30 13 2 12 14
M  V30 14 2 13 15
M  V30 15 1 13 16
M  V30 16 1 14 17
M  V30 17 2 16 18
M  V30 18 1 16 19
M  V30 19 1 17 20
M  V30 20 1 18 21
M  V30 21 2 19 22
M  V30 22 2 21 23
M  V30 23 1 6 7
M  V30 24 1 15 17
M  V30 25 1 22 23
M  V30 END BOND
M  V30 END CTAB
M  END
>  <ID>
ZINC000329653886

>  <name>
NA

>  <smiles>
CC1CC(CC(=O)N1)C(=O)Nc1cn(C)nc1-c1ccccc1

$$$$
ZINC001414444368
Actelion Java MolfileCreator 2.0

  0  0  0  0  0  0              0 V3000
M  V30 BEGIN CTAB
M  V30 COUNTS 24 26 0 0 0
M  V30 BEGIN ATOM
M  V30 1 O 5.1961 2.4999 0.0 0
M  V30 2 C 5.1961 1.4999 0.0 0
M  V30 3 N 4.3301 1.0 0.0 0
M  V30 4 C 6.0621 0.9999 0.0 0
M  V30 5 C 4.3301 0.0 0.0 0
M  V30 6 C 6.0621 0.0 0.0 0
M  V30 7 C 5.1961 -0.5 0.0 0
M  V30 8 C 3.4641 -0.5 0.0 0
M  V30 9 N 2.598 0.0 0.0 0
M  V30 10 C 1.732 -0.5 0.0 0
M  V30 11 C 2.598 1.0 0.0 0
M  V30 12 O 1.732 -1.5 0.0 0
M  V30 13 N 0.866 0.0 0.0 0
M  V30 14 C 0.0 -0.5 0.0 0
M  V30 15 C 0.0 -1.4999 0.0 0
M  V30 16 C -0.866 0.0 0.0 0
M  V30 17 C -0.866 -1.9999 0.0 0
M  V30 18 C -1.732 -0.4999 0.0 0
M  V30 19 C -1.732 -1.4999 0.0 0
M  V30 20 C -1.0739 -2.9781 0.0 0
M  V30 21 N -2.4751 -2.1691 0.0 0
M  V30 22 C -2.0684 -3.0826 0.0 0
M  V30 23 C -3.4533 -1.9612 0.0 0
M  V30 24 O -2.5684 -3.9487 0.0 0
M  V30 END ATOM
M  V30 BEGIN BOND
M  V30 1 2 1 2
M  V30 2 1 2 3
M  V30 3 1 2 4
M  V30 4 1 3 5
M  V30 5 2 4 6
M  V30 6 2 5 7
M  V30 7 1 5 8
M  V30 8 1 8 9
M  V30 9 1 9 10
M  V30 10 1 9 11
M  V30 11 2 10 12
M  V30 12 1 10 13
M  V30 13 1 13 14
M  V30 14 2 14 15
M  V30 15 1 14 16
M  V30 16 1 15 17
M  V30 17 2 16 18
M  V30 18 2 17 19
M  V30 19 1 17 20
M  V30 20 1 19 21
M  V30 21 2 20 22
M  V30 22 1 21 23
M  V30 23 1 22 24
M  V30 24 1 6 7
M  V30 25 1 18 19
M  V30 26 1 21 22
M  V30 END BOND
M  V30 END CTAB
M  END
>  <ID>
ZINC001414444368

>  <name>
NA

>  <smiles>
CN(Cc1cccc(=O)[nH]1)C(=O)Nc1ccc2n(C)c(O)cc2c1

$$$$
ZINC000637523664
Actelion Java MolfileCreator 2.0

  0  0  0  0  0  0              0 V3000
M  V30 BEGIN CTAB
M  V30 COUNTS 26 28 0 0 0
M  V30 BEGIN ATOM
M  V30 1 F 3.0517 -0.0282 0.0 0
M  V30 2 C 3.4344 -0.9521 0.0 0
M  V30 3 F 4.3583 -0.5694 0.0 0
M  V30 4 F 3.8171 -1.876 0.0 0
M  V30 5 C 2.5105 -1.3348 0.0 0
M  V30 6 C 1.7172 -0.726 0.0 0
M  V30 7 C 2.38 -2.3262 0.0 0
M  V30 8 C 0.7933 -1.1087 0.0 0
M  V30 9 C 1.4561 -2.7089 0.0 0
M  V30 10 C 0.6628 -2.1002 0.0 0
M  V30 11 C 0.0 -0.5 0.0 0
M  V30 12 N 0.866 0.0 0.0 0
M  V30 13 C -0.9659 -0.2411 0.0 0
M  V30 14 C -0.2588 -1.4659 0.0 0
M  V30 15 C 0.866 0.9999 0.0 0
M  V30 16 C -1.2247 -1.2071 0.0 0
M  V30 17 O 0.0 1.5 0.0 0
M  V30 18 N 1.732 1.4999 0.0 0
M  V30 19 C 1.732 2.4999 0.0 0
M  V30 20 C 2.598 3.0 0.0 0
M  V30 21 C 2.598 3.9999 0.0 0
M  V30 22 C 3.4641 2.4999 0.0 0
M  V30 23 O 1.732 4.4999 0.0 0
M  V30 24 N 3.4641 4.4999 0.0 0
M  V30 25 C 4.3301 2.9999 0.0 0
M  V30 26 C 4.3301 3.9999 0.0 0
M  V30 END ATOM
M  V30 BEGIN BOND
M  V30 1 1 1 2
M  V30 2 1 2 3
M  V30 3 1 2 4
M  V30 4 1 2 5
M  V30 5 2 5 6
M  V30 6 1 5 7
M  V30 7 1 6 8
M  V30 8 2 7 9
M  V30 9 2 8 10
M  V30 10 1 8 11
M  V30 11 1 11 12
M  V30 12 1 11 13
M  V30 13 1 11 14
M  V30 14 1 12 15
M  V30 15 1 13 16
M  V30 16 2 15 17
M  V30 17 1 15 18
M  V30 18 1 18 19
M  V30 19 1 19 20
M  V30 20 1 20 21
M  V30 21 2 20 22
M  V30 22 2 21 23
M  V30 23 1 21 24
M  V30 24 1 22 25
M  V30 25 1 24 26
M  V30 26 1 9 10
M  V30 27 1 14 16
M  V30 28 2 25 26
M  V30 END BOND
M  V30 END CTAB
M  END
>  <ID>
ZINC000637523664

>  <name>
NA

>  <smiles>
FC(F)(F)c1cccc(c1)C1(CCC1)NC(=O)NCc1ccc[nH]c1=O

$$$$
ZINC000367629043
Actelion Java MolfileCreator 2.0

  0  0  0  0  0  0              0 V3000
M  V30 BEGIN CTAB
M  V30 COUNTS 25 27 0 0 0
M  V30 BEGIN ATOM
M  V30 1 F -0.3767 0.7636 0.0 0
M  V30 2 C -0.6857 1.7147 0.0 0
M  V30 3 F -1.6368 1.4057 0.0 0
M  V30 4 F -0.9948 2.6658 0.0 0
M  V30 5 C 0.2652 2.0237 0.0 0
M  V30 6 C 1.0084 1.3546 0.0 0
M  V30 7 C 0.4731 3.0019 0.0 0
M  V30 8 C 1.9594 1.6636 0.0 0
M  V30 9 C 1.4242 3.3109 0.0 0
M  V30 10 C 2.1673 2.6418 0.0 0
M  V30 11 C 2.7026 0.9945 0.0 0
M  V30 12 C 2.598 0.0 0.0 0
M  V30 13 C 3.6807 1.2024 0.0 0
M  V30 14 N 1.732 -0.5 0.0 0
M  V30 15 C 3.5116 -0.4067 0.0 0
M  V30 16 C 4.1807 0.3364 0.0 0
M  V30 17 C 1.732 -1.5 0.0 0
M  V30 18 O 2.598 -2.0 0.0 0
M  V30 19 C 0.866 -2.0 0.0 0
M  V30 20 C 0.866 -3.0 0.0 0
M  V30 21 C 0.0 -1.5 0.0 0
M  V30 22 C 0.0 -3.5 0.0 0
M  V30 23 C -0.866 -2.0 0.0 0
M  V30 24 O 0.0 -4.5 0.0 0
M  V30 25 N -0.866 -3.0 0.0 0
M  V30 END ATOM
M  V30 BEGIN BOND
M  V30 1 1 1 2
M  V30 2 1 2 3
M  V30 3 1 2 4
M  V30 4 1 2 5
M  V30 5 2 5 6
M  V30 6 1 5 7
M  V30 7 1 6 8
M  V30 8 2 7 9
M  V30 9 2 8 10
M  V30 10 1 8 11
M  V30 11 1 11 12
M  V30 12 1 11 13
M  V30 13 1 12 14
M  V30 14 1 12 15
M  V30 15 1 13 16
M  V30 16 1 14 17
M  V30 17 2 17 18
M  V30 18 1 17 19
M  V30 19 1 19 20
M  V30 20 1 19 21
M  V30 21 1 20 22
M  V30 22 1 21 23
M  V30 23 2 22 24
M  V30 24 1 22 25
M  V30 25 1 9 10
M  V30 26 1 15 16
M  V30 27 1 23 25
M  V30 END BOND
M  V30 END CTAB
M  END
>  <ID>
ZINC000367629043

>  <name>
NA

>  <smiles>
FC(F)(F)c1cccc(c1)C1CCCC1NC(=O)C1CCNC(=O)C1

$$$$
ZINC000613095240
Actelion Java MolfileCreator 2.0

  0  0  0  0  0  0              0 V3000
M  V30 BEGIN CTAB
M  V30 COUNTS 24 26 0 0 0
M  V30 BEGIN ATOM
M  V30 1 F -0.157 -3.7458 0.0 0
M  V30 2 C 1.1795 -3.0649 0.0 0
M  V30 3 C 1.258 -1.5669 0.0 0
M  V30 4 C 2.4375 -3.8818 0.0 0
M  V30 5 C 2.5945 -0.8859 0.0 0
M  V30 6 C 0.0 -0.75 0.0 0
M  V30 7 C 3.774 -3.2008 0.0 0
M  V30 8 C 3.8525 -1.7029 0.0 0
M  V30 9 N 1.299 0.0 0.0 0
M  V30 10 C -1.3703 -0.1398 0.0 0
M  V30 11 C -0.1567 -2.2417 0.0 0
M  V30 12 F 5.032 -4.0178 0.0 0
M  V30 13 C 1.299 1.4999 0.0 0 CFG=1
M  V30 14 C -2.374 -1.2546 0.0 0
M  V30 15 C -1.624 -2.5536 0.0 0
M  V30 16 O 2.598 2.2499 0.0 0
M  V30 17 C 0.0 2.25 0.0 0
M  V30 18 N -1.299 1.5 0.0 0
M  V30 19 C 0.0 3.75 0.0 0
M  V30 20 C -2.598 2.25 0.0 0
M  V30 21 C -1.299 4.5 0.0 0
M  V30 22 O -3.8971 1.5 0.0 0
M  V30 23 N -2.598 3.75 0.0 0
M  V30 24 O -1.299 6.0 0.0 0
M  V30 END ATOM
M  V30 BEGIN BOND
M  V30 1 1 1 2
M  V30 2 2 2 3
M  V30 3 1 2 4
M  V30 4 1 3 5
M  V30 5 1 3 6
M  V30 6 2 4 7
M  V30 7 2 5 8
M  V30 8 1 6 9
M  V30 9 1 6 10
M  V30 10 1 6 11
M  V30 11 1 7 12
M  V30 12 1 13 9
M  V30 13 1 10 14
M  V30 14 1 11 15
M  V30 15 1 13 16 CFG=3
M  V30 16 1 13 17
M  V30 17 1 17 18
M  V30 18 2 17 19
M  V30 19 1 18 20
M  V30 20 1 19 21
M  V30 21 2 20 22
M  V30 22 1 20 23
M  V30 23 2 21 24
M  V30 24 1 7 8
M  V30 25 1 14 15
M  V30 26 1 21 23
M  V30 END BOND
M  V30 BEGIN COLLECTION
M  V30 MDLV30/STERAC1 ATOMS=(1 13)
M  V30 END COLLECTION
M  V30 END CTAB
M  END
>  <ID>
ZINC000613095240

>  <name>
NA

>  <smiles>
OC(NC1(CCCC1)c1ccc(F)cc1F)c1cc(=O)[nH]c(=O)[nH]1

$$$$
ZINC000680430230
Actelion Java MolfileCreator 2.0

  0  0  0  0  0  0              0 V3000
M  V30 BEGIN CTAB
M  V30 COUNTS 25 27 0 0 0
M  V30 BEGIN ATOM
M  V30 1 O 3.8971 5.9999 0.0 0
M  V30 2 C 3.8971 4.4999 0.0 0
M  V30 3 N 5.1961 3.7499 0.0 0
M  V30 4 C 2.598 3.75 0.0 0
M  V30 5 C 5.1961 2.2499 0.0 0
M  V30 6 C 2.598 2.2499 0.0 0
M  V30 7 C 3.8971 1.4999 0.0 0
M  V30 8 C 6.4951 1.4999 0.0 0
M  V30 9 C 1.299 1.4999 0.0 0
M  V30 10 C 6.4951 0.0 0.0 0
M  V30 11 O 0.0 2.25 0.0 0
M  V30 12 N 1.299 0.0 0.0 0
M  V30 13 C 0.0 -0.75 0.0 0
M  V30 14 C 1.258 -1.5669 0.0 0
M  V30 15 C -1.3703 -0.1398 0.0 0
M  V30 16 C -0.1567 -2.2417 0.0 0
M  V30 17 C 1.1795 -3.0649 0.0 0
M  V30 18 C 2.5945 -0.8859 0.0 0
M  V30 19 C -2.374 -1.2546 0.0 0
M  V30 20 C -1.624 -2.5536 0.0 0
M  V30 21 C 2.4375 -3.8818 0.0 0
M  V30 22 C 3.8525 -1.7029 0.0 0
M  V30 23 C 3.774 -3.2008 0.0 0
M  V30 24 O 5.032 -4.0178 0.0 0
M  V30 25 C 6.3685 -3.3368 0.0 0
M  V30 END ATOM
M  V30 BEGIN BOND
M  V30 1 2 1 2
M  V30 2 1 2 3
M  V30 3 1 2 4
M  V30 4 1 3 5
M  V30 5 1 4 6
M  V30 6 1 5 7
M  V30 7 1 5 8
M  V30 8 1 6 9
M  V30 9 1 8 10
M  V30 10 2 9 11
M  V30 11 1 9 12
M  V30 12 1 12 13
M  V30 13 1 13 14
M  V30 14 1 13 15
M  V30 15 1 13 16
M  V30 16 2 14 17
M  V30 17 1 14 18
M  V30 18 1 15 19
M  V30 19 1 16 20
M  V30 20 1 17 21
M  V30 21 2 18 22
M  V30 22 2 21 23
M  V30 23 1 23 24
M  V30 24 1 24 25
M  V30 25 1 6 7
M  V30 26 1 19 20
M  V30 27 1 22 23
M  V30 END BOND
M  V30 END CTAB
M  END
>  <ID>
ZINC000680430230

>  <name>
NA

>  <smiles>
CCC1CC(CC(=O)N1)C(=O)NC1(CCCC1)c1ccc(OC)cc1

$$$$
ZINC000447626204
Actelion Java MolfileCreator 2.0

  0  0  0  0  0  0              0 V3000
M  V30 BEGIN CTAB
M  V30 COUNTS 26 28 0 0 0
M  V30 BEGIN ATOM
M  V30 1 Cl 5.1961 1.5 0.0 0
M  V30 2 C 4.3301 1.0 0.0 0
M  V30 3 C 3.4641 1.5 0.0 0
M  V30 4 C 4.3301 0.0 0.0 0
M  V30 5 C 2.598 0.9999 0.0 0
M  V30 6 C 3.4641 -0.4999 0.0 0
M  V30 7 C 2.598 0.0 0.0 0
M  V30 8 C 1.732 1.4999 0.0 0
M  V30 9 N 1.732 -0.5 0.0 0
M  V30 10 C 1.732 2.4999 0.0 0
M  V30 11 C 0.866 0.9999 0.0 0
M  V30 12 C 1.732 -1.5 0.0 0
M  V30 13 C 0.866 3.0 0.0 0
M  V30 14 C 0.0 1.4999 0.0 0
M  V30 15 O 2.598 -2.0 0.0 0
M  V30 16 C 0.866 -2.0 0.0 0
M  V30 17 Cl 0.866 4.0 0.0 0
M  V30 18 C 0.0 2.4999 0.0 0
M  V30 19 C 0.866 -3.0 0.0 0
M  V30 20 C 0.0 -1.5 0.0 0
M  V30 21 C 0.0 -3.5 0.0 0
M  V30 22 C -0.866 -2.0 0.0 0
M  V30 23 O 0.0 -4.5 0.0 0
M  V30 24 N -0.866 -3.0 0.0 0
M  V30 25 C -1.732 -1.5 0.0 0
M  V30 26 C -1.732 -0.5 0.0 0
M  V30 END ATOM
M  V30 BEGIN BOND
M  V30 1 1 1 2
M  V30 2 2 2 3
M  V30 3 1 2 4
M  V30 4 1 3 5
M  V30 5 2 4 6
M  V30 6 2 5 7
M  V30 7 1 5 8
M  V30 8 1 7 9
M  V30 9 2 8 10
M  V30 10 1 8 11
M  V30 11 1 9 12
M  V30 12 1 10 13
M  V30 13 2 11 14
M  V30 14 2 12 15
M  V30 15 1 12 16
M  V30 16 1 13 17
M  V30 17 2 13 18
M  V30 18 1 16 19
M  V30 19 1 16 20
M  V30 20 1 19 21
M  V30 21 1 20 22
M  V30 22 2 21 23
M  V30 23 1 21 24
M  V30 24 1 22 25
M  V30 25 1 25 26
M  V30 26 1 6 7
M  V30 27 1 14 18
M  V30 28 1 22 24
M  V30 END BOND
M  V30 END CTAB
M  END
>  <ID>
ZINC000447626204

>  <name>
NA

>  <smiles>
CCC1CC(CC(=O)N1)C(=O)Nc1ccc(Cl)cc1-c1cccc(Cl)c1

$$$$
ZINC001580340947
Actelion Java MolfileCreator 2.0

  0  0  0  0  0  0              0 V3000
M  V30 BEGIN CTAB
M  V30 COUNTS 23 25 0 0 0
M  V30 BEGIN ATOM
M  V30 1 O 5.763 1.0408 0.0 0
M  V30 2 C 5.1752 0.2318 0.0 0
M  V30 3 N 4.1807 0.3364 0.0 0
M  V30 4 C 5.582 -0.6816 0.0 0
M  V30 5 C 3.6807 1.2024 0.0 0
M  V30 6 C 3.5116 -0.4067 0.0 0
M  V30 7 N 5.082 -1.5476 0.0 0
M  V30 8 C 6.5601 -0.8895 0.0 0
M  V30 9 C 2.7026 0.9945 0.0 0
M  V30 10 C 2.598 0.0 0.0 0
M  V30 11 C 5.7511 -2.2908 0.0 0
M  V30 12 N 6.6646 -1.884 0.0 0
M  V30 13 C 1.9594 1.6636 0.0 0
M  V30 14 C 1.732 -0.5 0.0 0
M  V30 15 C 5.6466 -3.2853 0.0 0
M  V30 16 C 7.4737 -2.4718 0.0 0
M  V30 17 O 1.0084 1.3546 0.0 0
M  V30 18 C 0.866 0.0 0.0 0
M  V30 19 C 6.4556 -3.8731 0.0 0
M  V30 20 C 7.3691 -3.4664 0.0 0
M  V30 21 O 0.0 -0.5 0.0 0
M  V30 22 C 8.1781 -4.0541 0.0 0
M  V30 23 N 9.0917 -3.6474 0.0 0
M  V30 END ATOM
M  V30 BEGIN BOND
M  V30 1 2 1 2
M  V30 2 1 2 3
M  V30 3 1 2 4
M  V30 4 1 3 5
M  V30 5 1 3 6
M  V30 6 1 4 7
M  V30 7 2 4 8
M  V30 8 1 5 9
M  V30 9 1 6 10
M  V30 10 2 7 11
M  V30 11 1 8 12
M  V30 12 1 9 13
M  V30 13 1 10 14
M  V30 14 1 11 15
M  V30 15 1 12 16
M  V30 16 1 13 17
M  V30 17 1 14 18
M  V30 18 2 15 19
M  V30 19 2 16 20
M  V30 20 1 18 21
M  V30 21 1 20 22
M  V30 22 1 22 23
M  V30 23 1 9 10
M  V30 24 1 11 12
M  V30 25 1 19 20
M  V30 END BOND
M  V30 END CTAB
M  END
>  <ID>
ZINC001580340947

>  <name>
NA

>  <smiles>
NCc1ccc2nc(cn2c1)C(=O)N1CC(CO)C(CCO)C1

$$$$
ZINC000446109160
Actelion Java MolfileCreator 2.0

  0  0  0  0  0  0              0 V3000
M  V30 BEGIN CTAB
M  V30 COUNTS 22 24 0 0 0
M  V30 BEGIN ATOM
M  V30 1 Br 1.299 4.4999 0.0 0
M  V30 2 C 2.598 3.7499 0.0 0
M  V30 3 C 2.598 2.2499 0.0 0
M  V30 4 C 3.8971 4.5 0.0 0
M  V30 5 C 3.8971 1.4999 0.0 0
M  V30 6 C 5.1961 3.75 0.0 0
M  V30 7 C 5.1961 2.25 0.0 0
M  V30 8 C 3.8971 0.0 0.0 0
M  V30 9 N 6.4951 1.5 0.0 0
M  V30 10 C 5.1961 -0.7499 0.0 0
M  V30 11 C 2.598 -0.75 0.0 0 CFG=2
M  V30 12 C 6.4951 0.0 0.0 0
M  V30 13 O 2.598 -2.25 0.0 0
M  V30 14 N 1.299 0.0 0.0 0
M  V30 15 O 7.7942 -0.7499 0.0 0
M  V30 16 C 0.0 -0.75 0.0 0
M  V30 17 C -1.299 0.0 0.0 0
M  V30 18 C 0.0 -2.2499 0.0 0
M  V30 19 O -1.299 1.5 0.0 0
M  V30 20 C -2.598 -0.7499 0.0 0
M  V30 21 C -1.299 -2.9999 0.0 0
M  V30 22 C -2.598 -2.2499 0.0 0
M  V30 END ATOM
M  V30 BEGIN BOND
M  V30 1 1 1 2
M  V30 2 2 2 3
M  V30 3 1 2 4
M  V30 4 1 3 5
M  V30 5 2 4 6
M  V30 6 2 5 7
M  V30 7 1 5 8
M  V30 8 1 7 9
M  V30 9 2 8 10
M  V30 10 1 11 8
M  V30 11 1 9 12
M  V30 12 1 11 13 CFG=3
M  V30 13 1 11 14
M  V30 14 2 12 15
M  V30 15 1 14 16
M  V30 16 2 16 17
M  V30 17 1 16 18
M  V30 18 1 17 19
M  V30 19 1 17 20
M  V30 20 2 18 21
M  V30 21 2 20 22
M  V30 22 1 6 7
M  V30 23 1 10 12
M  V30 24 1 21 22
M  V30 END BOND
M  V30 BEGIN COLLECTION
M  V30 MDLV30/STERAC1 ATOMS=(1 11)
M  V30 END COLLECTION
M  V30 END CTAB
M  END
>  <ID>
ZINC000446109160

>  <name>
NA

>  <smiles>
OC(Nc1ccccc1O)c1cc(=O)[nH]c2ccc(Br)cc12

$$$$
ZINC000332867813
Actelion Java MolfileCreator 2.0

  0  0  0  0  0  0              0 V3000
M  V30 BEGIN CTAB
M  V30 COUNTS 25 28 0 0 0
M  V30 BEGIN ATOM
M  V30 1 O 3.8971 5.9999 0.0 0
M  V30 2 C 3.8971 4.4999 0.0 0
M  V30 3 N 5.1961 3.7499 0.0 0
M  V30 4 C 2.598 3.75 0.0 0
M  V30 5 C 5.1961 2.2499 0.0 0
M  V30 6 C 2.598 2.2499 0.0 0
M  V30 7 C 3.8971 1.4999 0.0 0
M  V30 8 C 6.4951 1.4999 0.0 0
M  V30 9 C 1.299 1.4999 0.0 0
M  V30 10 C 6.4951 0.0 0.0 0
M  V30 11 O 0.0 2.25 0.0 0
M  V30 12 N 1.299 0.0 0.0 0
M  V30 13 C 0.0 -0.75 0.0 0
M  V30 14 C 1.258 -1.5669 0.0 0
M  V30 15 C -1.3703 -0.1398 0.0 0
M  V30 16 C -0.1567 -2.2417 0.0 0
M  V30 17 N 1.3365 -3.0649 0.0 0
M  V30 18 N 2.6583 -1.0294 0.0 0
M  V30 19 C -2.374 -1.2546 0.0 0
M  V30 20 C -1.624 -2.5536 0.0 0
M  V30 21 O 2.7853 -3.4531 0.0 0
M  V30 22 C 3.6023 -2.1951 0.0 0
M  V30 23 C 5.1003 -2.1166 0.0 0
M  V30 24 C 6.4368 -2.7976 0.0 0
M  V30 25 C 6.3583 -1.2996 0.0 0
M  V30 END ATOM
M  V30 BEGIN BOND
M  V30 1 2 1 2
M  V30 2 1 2 3
M  V30 3 1 2 4
M  V30 4 1 3 5
M  V30 5 1 4 6
M  V30 6 1 5 7
M  V30 7 1 5 8
M  V30 8 1 6 9
M  V30 9 1 8 10
M  V30 10 2 9 11
M  V30 11 1 9 12
M  V30 12 1 12 13
M  V30 13 1 13 14
M  V30 14 1 13 15
M  V30 15 1 13 16
M  V30 16 2 14 17
M  V30 17 1 14 18
M  V30 18 1 15 19
M  V30 19 1 16 20
M  V30 20 1 17 21
M  V30 21 2 18 22
M  V30 22 1 22 23
M  V30 23 1 23 24
M  V30 24 1 23 25
M  V30 25 1 6 7
M  V30 26 1 19 20
M  V30 27 1 21 22
M  V30 28 1 24 25
M  V30 END BOND
M  V30 END CTAB
M  END
>  <ID>
ZINC000332867813

>  <name>
NA

>  <smiles>
CCC1CC(CC(=O)N1)C(=O)NC1(CCCC1)c1noc(n1)C1CC1

$$$$
ZINC001444066461
Actelion Java MolfileCreator 2.0

  0  0  0  0  0  0              0 V3000
M  V30 BEGIN CTAB
M  V30 COUNTS 23 25 0 0 0
M  V30 BEGIN ATOM
M  V30 1 S 5.0467 -0.8364 0.0 0
M  V30 2 C 4.3776 -0.0932 0.0 0
M  V30 3 C 4.5467 -1.7024 0.0 0
M  V30 4 C 3.4641 -0.5 0.0 0
M  V30 5 C 3.5686 -1.4945 0.0 0
M  V30 6 C 2.598 0.0 0.0 0
M  V30 7 N 1.732 -0.5 0.0 0
M  V30 8 C 0.866 0.0 0.0 0
M  V30 9 C 0.0 -0.5 0.0 0
M  V30 10 N 0.8386 -1.0446 0.0 0
M  V30 11 C -0.9135 -0.0932 0.0 0
M  V30 12 C -0.1045 -1.4945 0.0 0
M  V30 13 C 0.7863 -2.0432 0.0 0
M  V30 14 C -1.5826 -0.8364 0.0 0
M  V30 15 C -1.0826 -1.7024 0.0 0
M  V30 16 O -0.1046 -2.4972 0.0 0
M  V30 17 C 1.625 -2.5879 0.0 0 CFG=2
M  V30 18 C 1.5726 -3.5865 0.0 0
M  V30 19 C 2.516 -2.1339 0.0 0
M  V30 20 C 2.4113 -4.1311 0.0 0
M  V30 21 C 3.3546 -2.6785 0.0 0
M  V30 22 O 2.359 -5.1298 0.0 0
M  V30 23 N 3.3023 -3.6771 0.0 0
M  V30 END ATOM
M  V30 BEGIN BOND
M  V30 1 1 1 2
M  V30 2 1 1 3
M  V30 3 2 2 4
M  V30 4 2 3 5
M  V30 5 1 4 6
M  V30 6 1 6 7
M  V30 7 1 7 8
M  V30 8 1 8 9
M  V30 9 1 9 10
M  V30 10 1 9 11
M  V30 11 1 9 12
M  V30 12 1 10 13
M  V30 13 1 11 14
M  V30 14 1 12 15
M  V30 15 2 13 16
M  V30 16 1 17 13 CFG=1
M  V30 17 1 17 18
M  V30 18 1 17 19
M  V30 19 1 18 20
M  V30 20 1 19 21
M  V30 21 2 20 22
M  V30 22 1 20 23
M  V30 23 1 4 5
M  V30 24 1 14 15
M  V30 25 1 21 23
M  V30 END BOND
M  V30 BEGIN COLLECTION
M  V30 MDLV30/STERAC1 ATOMS=(1 17)
M  V30 END COLLECTION
M  V30 END CTAB
M  END
>  <ID>
ZINC001444066461

>  <name>
NA

>  <smiles>
O=C(NC1(CNCc2ccsc2)CCCC1)C1CCNC(=O)C1

$$$$
ZINC001080612675
Actelion Java MolfileCreator 2.0

  0  0  0  0  0  0              0 V3000
M  V30 BEGIN CTAB
M  V30 COUNTS 26 28 0 0 0
M  V30 BEGIN ATOM
M  V30 1 O 5.1961 -0.5 0.0 0
M  V30 2 C 4.3301 0.0 0.0 0
M  V30 3 N 4.3301 1.0 0.0 0
M  V30 4 C 3.4641 -0.4999 0.0 0
M  V30 5 C 3.4641 1.5 0.0 0
M  V30 6 C 2.598 0.0 0.0 0
M  V30 7 O 3.4641 2.5 0.0 0
M  V30 8 C 2.598 1.0 0.0 0
M  V30 9 C 1.732 -0.5 0.0 0
M  V30 10 O 1.732 -1.5 0.0 0
M  V30 11 N 0.866 0.0 0.0 0
M  V30 12 C 0.0 -0.5 0.0 0
M  V30 13 C -0.9135 -0.0932 0.0 0
M  V30 14 C -0.1045 -1.4945 0.0 0
M  V30 15 C -1.5826 -0.8364 0.0 0
M  V30 16 C -1.1214 0.8848 0.0 0
M  V30 17 N -1.0826 -1.7024 0.0 0
M  V30 18 C -1.4894 -2.6159 0.0 0
M  V30 19 C -2.4839 -2.7205 0.0 0
M  V30 20 N -2.8906 -3.634 0.0 0
M  V30 21 N -3.8688 -3.8419 0.0 0
M  V30 22 C -2.3906 -4.5 0.0 0
M  V30 23 C -3.9733 -4.8364 0.0 0
M  V30 24 C -3.0598 -5.2432 0.0 0
M  V30 25 C -1.3961 -4.6046 0.0 0
M  V30 26 C -4.8393 -5.3364 0.0 0
M  V30 END ATOM
M  V30 BEGIN BOND
M  V30 1 2 1 2
M  V30 2 1 2 3
M  V30 3 1 2 4
M  V30 4 1 3 5
M  V30 5 2 4 6
M  V30 6 1 5 7
M  V30 7 2 5 8
M  V30 8 1 6 9
M  V30 9 1 9 10
M  V30 10 1 9 11
M  V30 11 1 11 12
M  V30 12 1 12 13
M  V30 13 1 12 14
M  V30 14 1 13 15
M  V30 15 1 13 16
M  V30 16 1 14 17
M  V30 17 1 17 18
M  V30 18 1 18 19
M  V30 19 1 19 20
M  V30 20 1 20 21
M  V30 21 1 20 22
M  V30 22 2 21 23
M  V30 23 2 22 24
M  V30 24 1 22 25
M  V30 25 1 23 26
M  V30 26 1 6 8
M  V30 27 1 15 17
M  V30 28 1 23 24
M  V30 END BOND
M  V30 END CTAB
M  END
>  <ID>
ZINC001080612675

>  <name>
NA

>  <smiles>
CC1CN(CCn2nc(C)cc2C)CC1NC(O)c1cc(O)[nH]c(=O)c1

$$$$
ZINC001331329001
Actelion Java MolfileCreator 2.0

  0  0  0  0  0  0              0 V3000
M  V30 BEGIN CTAB
M  V30 COUNTS 26 29 0 0 0
M  V30 BEGIN ATOM
M  V30 1 S 2.598 -0.75 0.0 0
M  V30 2 O 1.848 -2.049 0.0 0
M  V30 3 O 3.348 -2.049 0.0 0
M  V30 4 N 1.299 0.0 0.0 0
M  V30 5 C 3.8971 0.0 0.0 0
M  V30 6 C 0.0 -0.75 0.0 0
M  V30 7 C 5.1961 -0.75 0.0 0
M  V30 8 C 3.8971 1.5 0.0 0
M  V30 9 C 6.4952 0.0 0.0 0
M  V30 10 C 5.1961 2.25 0.0 0
M  V30 11 N 7.9217 -0.4635 0.0 0
M  V30 12 C 6.4952 1.5 0.0 0
M  V30 13 C 8.8034 0.75 0.0 0
M  V30 14 C 8.3853 -1.8901 0.0 0
M  V30 15 C 7.9217 1.9635 0.0 0
M  V30 16 C 9.8525 -2.2019 0.0 0
M  V30 17 N 10.316 -3.6285 0.0 0
M  V30 18 C 10.8562 -1.0872 0.0 0
M  V30 19 C 11.7832 -3.9404 0.0 0
M  V30 20 C 12.3234 -1.3991 0.0 0
M  V30 21 N 12.5332 -5.2394 0.0 0
M  V30 22 N 12.7869 -2.8257 0.0 0
M  V30 23 O 13.3271 -0.2844 0.0 0
M  V30 24 C 14.0005 -4.9276 0.0 0
M  V30 25 N 14.1573 -3.4358 0.0 0
M  V30 26 N 15.1152 -5.9313 0.0 0
M  V30 END ATOM
M  V30 BEGIN BOND
M  V30 1 2 1 2
M  V30 2 2 1 3
M  V30 3 1 1 4
M  V30 4 1 1 5
M  V30 5 1 4 6
M  V30 6 2 5 7
M  V30 7 1 5 8
M  V30 8 1 7 9
M  V30 9 2 8 10
M  V30 10 1 9 11
M  V30 11 2 9 12
M  V30 12 1 11 13
M  V30 13 1 11 14
M  V30 14 1 12 15
M  V30 15 1 14 16
M  V30 16 1 16 17
M  V30 17 2 16 18
M  V30 18 1 17 19
M  V30 19 1 18 20
M  V30 20 2 19 21
M  V30 21 1 19 22
M  V30 22 2 20 23
M  V30 23 1 21 24
M  V30 24 1 22 25
M  V30 25 2 24 26
M  V30 26 1 10 12
M  V30 27 1 13 15
M  V30 28 1 20 22
M  V30 29 1 24 25
M  V30 END BOND
M  V30 END CTAB
M  END
>  <ID>
ZINC001331329001

>  <name>
NA

>  <smiles>
CNS(=O)(=O)c1ccc2CCN(Cc3cc(=O)n4[nH]c(=N)nc4[nH]3)c2c1

$$$$
ZINC000679652126
Actelion Java MolfileCreator 2.0

  0  0  0  0  0  0              0 V3000
M  V30 BEGIN CTAB
M  V30 COUNTS 23 25 0 0 0
M  V30 BEGIN ATOM
M  V30 1 Cl 3.3546 -2.6785 0.0 0
M  V30 2 C 2.516 -2.1339 0.0 0
M  V30 3 C 2.5683 -1.1352 0.0 0
M  V30 4 C 1.625 -2.5879 0.0 0
M  V30 5 C 1.7296 -0.5906 0.0 0
M  V30 6 C 0.7863 -2.0432 0.0 0
M  V30 7 C 0.8386 -1.0446 0.0 0
M  V30 8 C 0.0 -0.5 0.0 0
M  V30 9 N 0.866 0.0 0.0 0
M  V30 10 C -0.9135 -0.0932 0.0 0
M  V30 11 C -0.1045 -1.4945 0.0 0
M  V30 12 C 0.866 0.9999 0.0 0
M  V30 13 C -1.5826 -0.8364 0.0 0
M  V30 14 C -1.0826 -1.7024 0.0 0
M  V30 15 O 1.732 1.4999 0.0 0
M  V30 16 C 0.0 1.5 0.0 0
M  V30 17 C -0.866 1.0 0.0 0
M  V30 18 C 0.0 2.5 0.0 0
M  V30 19 C -1.732 1.4999 0.0 0
M  V30 20 C -0.866 2.9999 0.0 0
M  V30 21 O -2.598 1.0 0.0 0
M  V30 22 N -1.732 2.5 0.0 0
M  V30 23 C -0.866 4.0 0.0 0
M  V30 END ATOM
M  V30 BEGIN BOND
M  V30 1 1 1 2
M  V30 2 2 2 3
M  V30 3 1 2 4
M  V30 4 1 3 5
M  V30 5 2 4 6
M  V30 6 2 5 7
M  V30 7 1 7 8
M  V30 8 1 8 9
M  V30 9 1 8 10
M  V30 10 1 8 11
M  V30 11 1 9 12
M  V30 12 1 10 13
M  V30 13 1 11 14
M  V30 14 2 12 15
M  V30 15 1 12 16
M  V30 16 1 16 17
M  V30 17 1 16 18
M  V30 18 1 17 19
M  V30 19 1 18 20
M  V30 20 2 19 21
M  V30 21 1 19 22
M  V30 22 1 20 23
M  V30 23 1 6 7
M  V30 24 1 13 14
M  V30 25 1 20 22
M  V30 END BOND
M  V30 END CTAB
M  END
>  <ID>
ZINC000679652126

>  <name>
NA

>  <smiles>
CC1CC(CC(=O)N1)C(=O)NC1(CCCC1)c1ccc(Cl)cc1

$$$$
ZINC000803123001
Actelion Java MolfileCreator 2.0

  0  0  0  0  0  0              0 V3000
M  V30 BEGIN CTAB
M  V30 COUNTS 22 23 0 0 0
M  V30 BEGIN ATOM
M  V30 1 F 2.4641 2.5 0.0 0
M  V30 2 C 3.4641 2.5 0.0 0
M  V30 3 F 3.4641 3.5 0.0 0
M  V30 4 F 4.4641 2.5 0.0 0
M  V30 5 C 3.4641 1.5 0.0 0
M  V30 6 C 2.598 1.0 0.0 0
M  V30 7 C 4.3301 1.0 0.0 0
M  V30 8 C 2.598 0.0 0.0 0
M  V30 9 C 4.3301 0.0 0.0 0
M  V30 10 C 3.4641 -0.4999 0.0 0
M  V30 11 C 1.732 -0.5 0.0 0
M  V30 12 O 1.732 -1.5 0.0 0
M  V30 13 C 0.866 0.0 0.0 0
M  V30 14 O 0.866 1.0 0.0 0
M  V30 15 N 0.0 -0.5 0.0 0
M  V30 16 C -0.866 0.0 0.0 0
M  V30 17 C 0.0 -1.4999 0.0 0
M  V30 18 C -1.732 -0.4999 0.0 0
M  V30 19 C -0.866 -1.9999 0.0 0
M  V30 20 C -1.732 -1.4999 0.0 0
M  V30 21 C -2.598 0.0 0.0 0
M  V30 22 O -2.598 -1.9999 0.0 0
M  V30 END ATOM
M  V30 BEGIN BOND
M  V30 1 1 1 2
M  V30 2 1 2 3
M  V30 3 1 2 4
M  V30 4 1 2 5
M  V30 5 2 5 6
M  V30 6 1 5 7
M  V30 7 1 6 8
M  V30 8 2 7 9
M  V30 9 2 8 10
M  V30 10 1 8 11
M  V30 11 1 11 12
M  V30 12 1 11 13
M  V30 13 2 13 14
M  V30 14 1 13 15
M  V30 15 1 15 16
M  V30 16 1 15 17
M  V30 17 1 16 18
M  V30 18 1 17 19
M  V30 19 1 18 20
M  V30 20 1 18 21
M  V30 21 2 20 22
M  V30 22 1 9 10
M  V30 23 1 19 20
M  V30 END BOND
M  V30 END CTAB
M  END
>  <ID>
ZINC000803123001

>  <name>
NA

>  <smiles>
CC1CN(CCC1=O)C(=O)C(O)c1cccc(c1)C(F)(F)F

$$$$
ZINC000152975931
Actelion Java MolfileCreator 2.0

  0  0  0  0  0  0              0 V3000
M  V30 BEGIN CTAB
M  V30 COUNTS 26 28 0 0 0
M  V30 BEGIN ATOM
M  V30 1 F 6.1385 -2.03 0.0 0
M  V30 2 C 5.8295 -2.981 0.0 0
M  V30 3 F 6.7806 -3.29 0.0 0
M  V30 4 F 5.5205 -3.9321 0.0 0
M  V30 5 C 4.8785 -2.672 0.0 0
M  V30 6 C 4.6705 -1.6939 0.0 0
M  V30 7 C 4.1353 -3.3411 0.0 0
M  V30 8 C 3.7195 -1.3848 0.0 0
M  V30 9 C 3.1843 -3.0321 0.0 0
M  V30 10 N 3.5116 -0.4067 0.0 0
M  V30 11 C 2.9763 -2.054 0.0 0
M  V30 12 N 4.1807 0.3364 0.0 0
M  V30 13 C 2.598 0.0 0.0 0
M  V30 14 C 3.6807 1.2024 0.0 0
M  V30 15 N 1.732 -0.5 0.0 0
M  V30 16 C 2.7026 0.9945 0.0 0
M  V30 17 C 4.0874 2.1159 0.0 0
M  V30 18 C 0.866 0.0 0.0 0
M  V30 19 O 0.866 1.0 0.0 0
M  V30 20 C 0.0 -0.5 0.0 0 CFG=2
M  V30 21 C -0.866 0.0 0.0 0
M  V30 22 C 0.0 -1.4999 0.0 0
M  V30 23 C -1.732 -0.4999 0.0 0
M  V30 24 C -0.866 -1.9999 0.0 0
M  V30 25 O -2.598 0.0 0.0 0
M  V30 26 N -1.732 -1.4999 0.0 0
M  V30 END ATOM
M  V30 BEGIN BOND
M  V30 1 1 1 2
M  V30 2 1 2 3
M  V30 3 1 2 4
M  V30 4 1 2 5
M  V30 5 2 5 6
M  V30 6 1 5 7
M  V30 7 1 6 8
M  V30 8 2 7 9
M  V30 9 1 8 10
M  V30 10 2 8 11
M  V30 11 1 10 12
M  V30 12 1 10 13
M  V30 13 1 12 14
M  V30 14 2 13 15 CFG=2
M  V30 15 1 13 16
M  V30 16 1 14 17
M  V30 17 1 15 18
M  V30 18 2 18 19
M  V30 19 1 20 18 CFG=1
M  V30 20 1 20 21
M  V30 21 1 20 22
M  V30 22 1 21 23
M  V30 23 1 22 24
M  V30 24 2 23 25
M  V30 25 1 23 26
M  V30 26 1 9 11
M  V30 27 2 14 16
M  V30 28 1 24 26
M  V30 END BOND
M  V30 BEGIN COLLECTION
M  V30 MDLV30/STERAC1 ATOMS=(1 20)
M  V30 END COLLECTION
M  V30 END CTAB
M  END
>  <ID>
ZINC000152975931

>  <name>
NA

>  <smiles>
Cc1cc(=NC(=O)C2CCNC(=O)C2)n([nH]1)-c1cccc(c1)C(F)(F)F

$$$$
ZINC000887165496
Actelion Java MolfileCreator 2.0

  0  0  0  0  0  0              0 V3000
M  V30 BEGIN CTAB
M  V30 COUNTS 26 28 0 0 0
M  V30 BEGIN ATOM
M  V30 1 F 6.0621 -4.9999 0.0 0
M  V30 2 C 5.1961 -4.5 0.0 0
M  V30 3 C 5.1961 -3.4999 0.0 0
M  V30 4 C 4.3301 -5.0 0.0 0
M  V30 5 C 4.3301 -2.9999 0.0 0
M  V30 6 C 3.4641 -4.5 0.0 0
M  V30 7 N 4.3301 -2.0 0.0 0
M  V30 8 C 3.4641 -3.5 0.0 0
M  V30 9 C 5.1961 -1.5 0.0 0
M  V30 10 C 3.4641 -1.5 0.0 0
M  V30 11 O 6.0621 -2.0 0.0 0
M  V30 12 C 5.1961 -0.5 0.0 0
M  V30 13 C 3.4641 -0.5 0.0 0 CFG=2
M  V30 14 C 4.3301 0.0 0.0 0
M  V30 15 C 2.598 0.0 0.0 0
M  V30 16 O 2.598 1.0 0.0 0
M  V30 17 N 1.732 -0.5 0.0 0
M  V30 18 C 0.866 0.0 0.0 0
M  V30 19 C 1.732 -1.5 0.0 0
M  V30 20 C 0.0 -0.5 0.0 0
M  V30 21 N -0.866 0.0 0.0 0
M  V30 22 C 0.0 -1.4999 0.0 0
M  V30 23 C -1.732 -0.4999 0.0 0
M  V30 24 C -0.866 -1.9999 0.0 0
M  V30 25 O -2.598 0.0 0.0 0
M  V30 26 C -1.732 -1.4999 0.0 0
M  V30 END ATOM
M  V30 BEGIN BOND
M  V30 1 1 1 2
M  V30 2 2 2 3
M  V30 3 1 2 4
M  V30 4 1 3 5
M  V30 5 2 4 6
M  V30 6 1 5 7
M  V30 7 2 5 8
M  V30 8 1 7 9
M  V30 9 1 7 10
M  V30 10 2 9 11
M  V30 11 1 9 12
M  V30 12 1 13 10
M  V30 13 1 12 14
M  V30 14 1 13 15 CFG=1
M  V30 15 2 15 16
M  V30 16 1 15 17
M  V30 17 1 17 18
M  V30 18 1 17 19
M  V30 19 1 18 20
M  V30 20 1 20 21
M  V30 21 2 20 22
M  V30 22 1 21 23
M  V30 23 1 22 24
M  V30 24 2 23 25
M  V30 25 1 23 26
M  V30 26 1 6 8
M  V30 27 1 13 14
M  V30 28 2 24 26
M  V30 END BOND
M  V30 BEGIN COLLECTION
M  V30 MDLV30/STERAC1 ATOMS=(1 13)
M  V30 END COLLECTION
M  V30 END CTAB
M  END
>  <ID>
ZINC000887165496

>  <name>
NA

>  <smiles>
CN(Cc1cccc(=O)[nH]1)C(=O)C1CCC(=O)N(C1)c1cccc(F)c1

$$$$
ZINC001328556578
Actelion Java MolfileCreator 2.0

  0  0  0  0  0  0              0 V3000
M  V30 BEGIN CTAB
M  V30 COUNTS 24 26 0 0 0
M  V30 BEGIN ATOM
M  V30 1 S 2.6835 2.3816 0.0 0
M  V30 2 C 3.8971 1.5 0.0 0
M  V30 3 C 3.1471 3.8082 0.0 0
M  V30 4 C 5.1106 2.3816 0.0 0
M  V30 5 C 3.8971 0.0 0.0 0 CFG=1
M  V30 6 C 4.6471 3.8082 0.0 0
M  V30 7 N 5.1961 -0.75 0.0 0
M  V30 8 C 2.598 -0.75 0.0 0
M  V30 9 C 6.4952 0.0 0.0 0
M  V30 10 C 1.299 0.0 0.0 0
M  V30 11 C 1.848 -2.049 0.0 0
M  V30 12 C 3.348 -2.049 0.0 0
M  V30 13 C 7.7942 -0.75 0.0 0
M  V30 14 O 0.0 -0.75 0.0 0
M  V30 15 N 7.7942 -2.25 0.0 0
M  V30 16 C 9.0932 0.0 0.0 0
M  V30 17 C 9.0932 -3.0 0.0 0
M  V30 18 C 10.3923 -0.75 0.0 0
M  V30 19 N 9.4051 -4.4672 0.0 0
M  V30 20 N 10.3923 -2.25 0.0 0
M  V30 21 O 11.6913 0.0 0.0 0
M  V30 22 C 10.8969 -4.624 0.0 0
M  V30 23 N 11.507 -3.2537 0.0 0
M  V30 24 N 11.6469 -5.923 0.0 0
M  V30 END ATOM
M  V30 BEGIN BOND
M  V30 1 1 1 2
M  V30 2 1 1 3
M  V30 3 2 2 4
M  V30 4 1 5 2
M  V30 5 2 3 6
M  V30 6 1 5 7 CFG=1
M  V30 7 1 5 8
M  V30 8 1 7 9
M  V30 9 1 8 10
M  V30 10 1 8 11
M  V30 11 1 8 12
M  V30 12 1 9 13
M  V30 13 1 10 14
M  V30 14 1 13 15
M  V30 15 2 13 16
M  V30 16 1 15 17
M  V30 17 1 16 18
M  V30 18 2 17 19
M  V30 19 1 17 20
M  V30 20 2 18 21
M  V30 21 1 19 22
M  V30 22 1 20 23
M  V30 23 2 22 24
M  V30 24 1 4 6
M  V30 25 1 18 20
M  V30 26 1 22 23
M  V30 END BOND
M  V30 BEGIN COLLECTION
M  V30 MDLV30/STERAC1 ATOMS=(1 5)
M  V30 END COLLECTION
M  V30 END CTAB
M  END
>  <ID>
ZINC001328556578

>  <name>
NA

>  <smiles>
CC(C)(CO)C(NCc1cc(=O)n2[nH]c(=N)nc2[nH]1)c1cccs1

$$$$
ZINC001684877584
Actelion Java MolfileCreator 2.0

  0  0  0  0  0  0              0 V3000
M  V30 BEGIN CTAB
M  V30 COUNTS 25 27 0 0 0
M  V30 BEGIN ATOM
M  V30 1 F 3.8993 -1.8398 0.0 0
M  V30 2 C 3.3546 -2.6785 0.0 0
M  V30 3 F 4.1933 -3.2231 0.0 0
M  V30 4 F 2.81 -3.5172 0.0 0
M  V30 5 C 2.516 -2.1339 0.0 0
M  V30 6 C 2.5683 -1.1352 0.0 0
M  V30 7 C 1.625 -2.5879 0.0 0
M  V30 8 C 1.7296 -0.5906 0.0 0
M  V30 9 C 0.7863 -2.0432 0.0 0
M  V30 10 C 0.8386 -1.0446 0.0 0
M  V30 11 C 0.0 -0.5 0.0 0
M  V30 12 N 0.866 0.0 0.0 0
M  V30 13 C -0.9135 -0.0932 0.0 0
M  V30 14 C -0.1045 -1.4945 0.0 0
M  V30 15 C 0.866 0.9999 0.0 0
M  V30 16 C -1.5826 -0.8364 0.0 0
M  V30 17 C -1.0826 -1.7024 0.0 0
M  V30 18 O 0.0 1.5 0.0 0
M  V30 19 N 1.732 1.4999 0.0 0
M  V30 20 C 1.732 2.4999 0.0 0 CFG=2
M  V30 21 C 2.541 3.0877 0.0 0
M  V30 22 C 0.923 3.0877 0.0 0
M  V30 23 O 2.232 4.0388 0.0 0
M  V30 24 C 1.232 4.0388 0.0 0
M  V30 25 O 0.6442 4.8478 0.0 0
M  V30 END ATOM
M  V30 BEGIN BOND
M  V30 1 1 1 2
M  V30 2 1 2 3
M  V30 3 1 2 4
M  V30 4 1 2 5
M  V30 5 2 5 6
M  V30 6 1 5 7
M  V30 7 1 6 8
M  V30 8 2 7 9
M  V30 9 2 8 10
M  V30 10 1 10 11
M  V30 11 1 11 12
M  V30 12 1 11 13
M  V30 13 1 11 14
M  V30 14 1 12 15
M  V30 15 1 13 16
M  V30 16 1 14 17
M  V30 17 2 15 18
M  V30 18 1 15 19
M  V30 19 1 20 19 CFG=1
M  V30 20 1 20 21
M  V30 21 1 20 22
M  V30 22 1 21 23
M  V30 23 1 22 24
M  V30 24 2 24 25
M  V30 25 1 9 10
M  V30 26 1 16 17
M  V30 27 1 23 24
M  V30 END BOND
M  V30 BEGIN COLLECTION
M  V30 MDLV30/STERAC1 ATOMS=(1 20)
M  V30 END COLLECTION
M  V30 END CTAB
M  END
>  <ID>
ZINC001684877584

>  <name>
NA

>  <smiles>
FC(F)(F)c1ccc(cc1)C1(CCCC1)NC(=O)NC1COC(=O)C1

$$$$
ZINC000578468548
Actelion Java MolfileCreator 2.0

  0  0  0  0  0  0              0 V3000
M  V30 BEGIN CTAB
M  V30 COUNTS 24 26 0 0 0
M  V30 BEGIN ATOM
M  V30 1 F -0.314 5.2417 0.0 0
M  V30 2 C -0.2355 3.7438 0.0 0
M  V30 3 C 1.1009 3.0628 0.0 0
M  V30 4 C -1.4935 2.9268 0.0 0
M  V30 5 C 1.1795 1.5649 0.0 0
M  V30 6 C -1.415 1.4289 0.0 0
M  V30 7 C -0.0785 0.7479 0.0 0
M  V30 8 C 0.0 -0.75 0.0 0
M  V30 9 N 1.299 0.0 0.0 0
M  V30 10 C -0.1567 -2.2417 0.0 0
M  V30 11 C -1.3703 -0.1398 0.0 0
M  V30 12 C 2.598 -0.75 0.0 0
M  V30 13 C -1.624 -2.5536 0.0 0
M  V30 14 C -2.374 -1.2546 0.0 0
M  V30 15 O 3.8971 0.0 0.0 0
M  V30 16 C 2.598 -2.25 0.0 0
M  V30 17 C 1.299 -3.0 0.0 0
M  V30 18 C 3.8971 -2.9999 0.0 0
M  V30 19 C 1.299 -4.5 0.0 0
M  V30 20 C 3.8971 -4.4999 0.0 0
M  V30 21 O 0.0 -5.25 0.0 0
M  V30 22 N 2.598 -5.25 0.0 0
M  V30 23 C 5.1961 -5.2499 0.0 0
M  V30 24 C 6.4951 -4.4999 0.0 0
M  V30 END ATOM
M  V30 BEGIN BOND
M  V30 1 1 1 2
M  V30 2 2 2 3
M  V30 3 1 2 4
M  V30 4 1 3 5
M  V30 5 2 4 6
M  V30 6 2 5 7
M  V30 7 1 7 8
M  V30 8 1 8 9
M  V30 9 1 8 10
M  V30 10 1 8 11
M  V30 11 1 9 12
M  V30 12 1 10 13
M  V30 13 1 11 14
M  V30 14 2 12 15
M  V30 15 1 12 16
M  V30 16 1 16 17
M  V30 17 1 16 18
M  V30 18 1 17 19
M  V30 19 1 18 20
M  V30 20 2 19 21
M  V30 21 1 19 22
M  V30 22 1 20 23
M  V30 23 1 23 24
M  V30 24 1 6 7
M  V30 25 1 13 14
M  V30 26 1 20 22
M  V30 END BOND
M  V30 END CTAB
M  END
>  <ID>
ZINC000578468548

>  <name>
NA

>  <smiles>
CCC1CC(CC(=O)N1)C(=O)NC1(CCCC1)c1ccc(F)cc1

$$$$
ZINC000152092330
Actelion Java MolfileCreator 2.0

  0  0  0  0  0  0              0 V3000
M  V30 BEGIN CTAB
M  V30 COUNTS 23 25 0 0 0
M  V30 BEGIN ATOM
M  V30 1 F 4.3432 -4.3193 0.0 0
M  V30 2 C 4.1353 -3.3411 0.0 0
M  V30 3 C 4.8785 -2.672 0.0 0
M  V30 4 C 3.1843 -3.0321 0.0 0
M  V30 5 C 4.6705 -1.6939 0.0 0
M  V30 6 C 2.9763 -2.054 0.0 0
M  V30 7 C 3.7195 -1.3848 0.0 0
M  V30 8 N 3.5116 -0.4067 0.0 0
M  V30 9 N 4.1807 0.3364 0.0 0
M  V30 10 C 2.598 0.0 0.0 0
M  V30 11 C 3.6807 1.2024 0.0 0
M  V30 12 N 1.732 -0.5 0.0 0
M  V30 13 C 2.7026 0.9945 0.0 0
M  V30 14 C 4.0874 2.1159 0.0 0
M  V30 15 C 0.866 0.0 0.0 0
M  V30 16 O 0.866 1.0 0.0 0
M  V30 17 C 0.0 -0.5 0.0 0 CFG=2
M  V30 18 C -0.866 0.0 0.0 0
M  V30 19 C 0.0 -1.4999 0.0 0
M  V30 20 C -1.732 -0.4999 0.0 0
M  V30 21 C -0.866 -1.9999 0.0 0
M  V30 22 O -2.598 0.0 0.0 0
M  V30 23 N -1.732 -1.4999 0.0 0
M  V30 END ATOM
M  V30 BEGIN BOND
M  V30 1 1 1 2
M  V30 2 2 2 3
M  V30 3 1 2 4
M  V30 4 1 3 5
M  V30 5 2 4 6
M  V30 6 2 5 7
M  V30 7 1 7 8
M  V30 8 1 8 9
M  V30 9 1 8 10
M  V30 10 1 9 11
M  V30 11 2 10 12 CFG=2
M  V30 12 1 10 13
M  V30 13 1 11 14
M  V30 14 1 12 15
M  V30 15 2 15 16
M  V30 16 1 17 15 CFG=1
M  V30 17 1 17 18
M  V30 18 1 17 19
M  V30 19 1 18 20
M  V30 20 1 19 21
M  V30 21 2 20 22
M  V30 22 1 20 23
M  V30 23 1 6 7
M  V30 24 2 11 13
M  V30 25 1 21 23
M  V30 END BOND
M  V30 BEGIN COLLECTION
M  V30 MDLV30/STERAC1 ATOMS=(1 17)
M  V30 END COLLECTION
M  V30 END CTAB
M  END
>  <ID>
ZINC000152092330

>  <name>
NA

>  <smiles>
Cc1cc(=NC(=O)C2CCNC(=O)C2)n([nH]1)-c1ccc(F)cc1

$$$$
ZINC000541719918
Actelion Java MolfileCreator 2.0

  0  0  0  0  0  0              0 V3000
M  V30 BEGIN CTAB
M  V30 COUNTS 25 27 0 0 0
M  V30 BEGIN ATOM
M  V30 1 F -0.1046 -2.4972 0.0 0
M  V30 2 C 0.7863 -2.0432 0.0 0
M  V30 3 C 0.8386 -1.0446 0.0 0
M  V30 4 C 1.625 -2.5879 0.0 0
M  V30 5 C 1.7296 -0.5906 0.0 0
M  V30 6 C 0.0 -0.5 0.0 0
M  V30 7 C 2.516 -2.1339 0.0 0
M  V30 8 C 2.5683 -1.1352 0.0 0
M  V30 9 N 0.866 0.0 0.0 0
M  V30 10 C -0.9135 -0.0932 0.0 0
M  V30 11 C -0.1045 -1.4945 0.0 0
M  V30 12 F 3.3546 -2.6785 0.0 0
M  V30 13 C 0.866 0.9999 0.0 0
M  V30 14 C -1.5826 -0.8364 0.0 0
M  V30 15 C -1.0826 -1.7024 0.0 0
M  V30 16 O 1.732 1.4999 0.0 0
M  V30 17 C 0.0 1.5 0.0 0
M  V30 18 C 0.0 2.5 0.0 0
M  V30 19 C -0.866 1.0 0.0 0
M  V30 20 C -0.866 3.0 0.0 0
M  V30 21 C -1.732 1.5 0.0 0
M  V30 22 O -0.866 4.0 0.0 0
M  V30 23 N -1.732 2.5 0.0 0
M  V30 24 C -2.598 1.0 0.0 0
M  V30 25 C -2.598 0.0 0.0 0
M  V30 END ATOM
M  V30 BEGIN BOND
M  V30 1 1 1 2
M  V30 2 2 2 3
M  V30 3 1 2 4
M  V30 4 1 3 5
M  V30 5 1 3 6
M  V30 6 2 4 7
M  V30 7 2 5 8
M  V30 8 1 6 9
M  V30 9 1 6 10
M  V30 10 1 6 11
M  V30 11 1 7 12
M  V30 12 1 9 13
M  V30 13 1 10 14
M  V30 14 1 11 15
M  V30 15 2 13 16
M  V30 16 1 13 17
M  V30 17 1 17 18
M  V30 18 1 17 19
M  V30 19 1 18 20
M  V30 20 1 19 21
M  V30 21 2 20 22
M  V30 22 1 20 23
M  V30 23 1 21 24
M  V30 24 1 24 25
M  V30 25 1 7 8
M  V30 26 1 14 15
M  V30 27 1 21 23
M  V30 END BOND
M  V30 END CTAB
M  END
>  <ID>
ZINC000541719918

>  <name>
NA

>  <smiles>
CCC1CC(CC(=O)N1)C(=O)NC1(CCCC1)c1ccc(F)cc1F

$$$$
ZINC001466833932
Actelion Java MolfileCreator 2.0

  0  0  0  0  0  0              0 V3000
M  V30 BEGIN CTAB
M  V30 COUNTS 26 28 0 0 0
M  V30 BEGIN ATOM
M  V30 1 F 3.8993 -1.8398 0.0 0
M  V30 2 C 3.3546 -2.6785 0.0 0
M  V30 3 F 4.1933 -3.2231 0.0 0
M  V30 4 F 2.81 -3.5172 0.0 0
M  V30 5 C 2.516 -2.1339 0.0 0
M  V30 6 C 2.5683 -1.1352 0.0 0
M  V30 7 C 1.625 -2.5879 0.0 0
M  V30 8 C 1.7296 -0.5906 0.0 0
M  V30 9 C 0.7863 -2.0432 0.0 0
M  V30 10 C 0.8386 -1.0446 0.0 0
M  V30 11 C 0.0 -0.5 0.0 0
M  V30 12 N 0.866 0.0 0.0 0
M  V30 13 C -0.9135 -0.0932 0.0 0
M  V30 14 C -0.1045 -1.4945 0.0 0
M  V30 15 C 0.866 0.9999 0.0 0
M  V30 16 C -1.5826 -0.8364 0.0 0
M  V30 17 C -1.0826 -1.7024 0.0 0
M  V30 18 O 1.732 1.4999 0.0 0
M  V30 19 C 0.0 1.5 0.0 0
M  V30 20 C -0.866 1.0 0.0 0
M  V30 21 C 0.0 2.5 0.0 0
M  V30 22 C -1.732 1.4999 0.0 0
M  V30 23 C -0.866 2.9999 0.0 0
M  V30 24 O -2.598 1.0 0.0 0
M  V30 25 N -1.732 2.5 0.0 0
M  V30 26 C -0.866 4.0 0.0 0
M  V30 END ATOM
M  V30 BEGIN BOND
M  V30 1 1 1 2
M  V30 2 1 2 3
M  V30 3 1 2 4
M  V30 4 1 2 5
M  V30 5 2 5 6
M  V30 6 1 5 7
M  V30 7 1 6 8
M  V30 8 2 7 9
M  V30 9 2 8 10
M  V30 10 1 10 11
M  V30 11 1 11 12
M  V30 12 1 11 13
M  V30 13 1 11 14
M  V30 14 1 12 15
M  V30 15 1 13 16
M  V30 16 1 14 17
M  V30 17 2 15 18
M  V30 18 1 15 19
M  V30 19 2 19 20
M  V30 20 1 19 21
M  V30 21 1 20 22
M  V30 22 2 21 23
M  V30 23 2 22 24
M  V30 24 1 22 25
M  V30 25 1 23 26
M  V30 26 1 9 10
M  V30 27 1 16 17
M  V30 28 1 23 25
M  V30 END BOND
M  V30 END CTAB
M  END
>  <ID>
ZINC001466833932

>  <name>
NA

>  <smiles>
Cc1cc(cc(=O)[nH]1)C(=O)NC1(CCCC1)c1ccc(cc1)C(F)(F)F

$$$$
ZINC000346039690
Actelion Java MolfileCreator 2.0

  0  0  0  0  0  0              0 V3000
M  V30 BEGIN CTAB
M  V30 COUNTS 23 24 0 0 0
M  V30 BEGIN ATOM
M  V30 1 F 6.0621 0.0 0.0 0
M  V30 2 C 5.1961 -0.5 0.0 0
M  V30 3 C 4.3301 0.0 0.0 0
M  V30 4 C 5.1961 -1.4999 0.0 0
M  V30 5 C 3.4641 -0.5 0.0 0
M  V30 6 C 4.3301 -1.9999 0.0 0
M  V30 7 O 2.598 0.0 0.0 0
M  V30 8 C 3.4641 -1.4999 0.0 0
M  V30 9 C 2.598 0.9999 0.0 0
M  V30 10 N 2.598 -1.9999 0.0 0
M  V30 11 C 1.732 1.4999 0.0 0
M  V30 12 C 1.732 -1.4999 0.0 0
M  V30 13 C 1.732 2.4999 0.0 0
M  V30 14 O 1.732 -0.5 0.0 0
M  V30 15 C 0.866 -1.9999 0.0 0
M  V30 16 C 0.0 -1.4999 0.0 0
M  V30 17 C 0.866 -2.9999 0.0 0
M  V30 18 C -0.866 -1.9999 0.0 0
M  V30 19 C 0.0 -3.4999 0.0 0
M  V30 20 O -1.732 -1.4999 0.0 0
M  V30 21 N -0.866 -2.9999 0.0 0
M  V30 22 C 0.0 -4.4999 0.0 0
M  V30 23 C 0.866 -4.9999 0.0 0
M  V30 END ATOM
M  V30 BEGIN BOND
M  V30 1 1 1 2
M  V30 2 2 2 3
M  V30 3 1 2 4
M  V30 4 1 3 5
M  V30 5 2 4 6
M  V30 6 1 5 7
M  V30 7 2 5 8
M  V30 8 1 7 9
M  V30 9 1 8 10
M  V30 10 1 9 11
M  V30 11 1 10 12
M  V30 12 1 11 13
M  V30 13 2 12 14
M  V30 14 1 12 15
M  V30 15 1 15 16
M  V30 16 1 15 17
M  V30 17 1 16 18
M  V30 18 1 17 19
M  V30 19 2 18 20
M  V30 20 1 18 21
M  V30 21 1 19 22
M  V30 22 1 22 23
M  V30 23 1 6 8
M  V30 24 1 19 21
M  V30 END BOND
M  V30 END CTAB
M  END
>  <ID>
ZINC000346039690

>  <name>
NA

>  <smiles>
CCCOc1cc(F)ccc1NC(=O)C1CC(CC)NC(=O)C1

$$$$
ZINC000680430225
Actelion Java MolfileCreator 2.0

  0  0  0  0  0  0              0 V3000
M  V30 BEGIN CTAB
M  V30 COUNTS 25 27 0 0 0
M  V30 BEGIN ATOM
M  V30 1 O 3.8971 5.9999 0.0 0
M  V30 2 C 3.8971 4.4999 0.0 0
M  V30 3 N 5.1961 3.7499 0.0 0
M  V30 4 C 2.598 3.75 0.0 0
M  V30 5 C 5.1961 2.2499 0.0 0
M  V30 6 C 2.598 2.2499 0.0 0
M  V30 7 C 3.8971 1.4999 0.0 0
M  V30 8 C 6.4951 1.4999 0.0 0
M  V30 9 C 1.299 1.4999 0.0 0
M  V30 10 C 6.4951 0.0 0.0 0
M  V30 11 O 0.0 2.25 0.0 0
M  V30 12 N 1.299 0.0 0.0 0
M  V30 13 C 0.0 -0.75 0.0 0
M  V30 14 C 1.258 -1.5669 0.0 0
M  V30 15 C -1.3703 -0.1398 0.0 0
M  V30 16 C -0.1567 -2.2417 0.0 0
M  V30 17 C 1.1795 -3.0649 0.0 0
M  V30 18 C 2.5945 -0.8859 0.0 0
M  V30 19 C -2.374 -1.2546 0.0 0
M  V30 20 C -1.624 -2.5536 0.0 0
M  V30 21 C 2.4375 -3.8818 0.0 0
M  V30 22 C 3.8525 -1.7029 0.0 0
M  V30 23 C 3.774 -3.2008 0.0 0
M  V30 24 O 5.032 -4.0178 0.0 0
M  V30 25 C 6.3685 -3.3368 0.0 0
M  V30 END ATOM
M  V30 BEGIN BOND
M  V30 1 2 1 2
M  V30 2 1 2 3
M  V30 3 1 2 4
M  V30 4 1 3 5
M  V30 5 1 4 6
M  V30 6 1 5 7
M  V30 7 1 5 8
M  V30 8 1 6 9
M  V30 9 1 8 10
M  V30 10 2 9 11
M  V30 11 1 9 12
M  V30 12 1 12 13
M  V30 13 1 13 14
M  V30 14 1 13 15
M  V30 15 1 13 16
M  V30 16 2 14 17
M  V30 17 1 14 18
M  V30 18 1 15 19
M  V30 19 1 16 20
M  V30 20 1 17 21
M  V30 21 2 18 22
M  V30 22 2 21 23
M  V30 23 1 23 24
M  V30 24 1 24 25
M  V30 25 1 6 7
M  V30 26 1 19 20
M  V30 27 1 22 23
M  V30 END BOND
M  V30 END CTAB
M  END
>  <ID>
ZINC000680430225

>  <name>
NA

>  <smiles>
CCC1CC(CC(=O)N1)C(=O)NC1(CCCC1)c1ccc(OC)cc1

$$$$
ZINC000186155122
Actelion Java MolfileCreator 2.0

  0  0  0  0  0  0              0 V3000
M  V30 BEGIN CTAB
M  V30 COUNTS 25 28 0 0 0
M  V30 BEGIN ATOM
M  V30 1 Cl -1.8866 2.4052 0.0 0
M  V30 2 C -0.9956 1.9512 0.0 0
M  V30 3 C -0.9433 0.9526 0.0 0
M  V30 4 C -0.157 2.4958 0.0 0
M  V30 5 C -0.0523 0.4986 0.0 0
M  V30 6 C 0.7339 2.0418 0.0 0
M  V30 7 C 0.7863 1.0432 0.0 0
M  V30 8 C 0.0 -0.5 0.0 0
M  V30 9 N 0.866 0.0 0.0 0
M  V30 10 C -0.1045 -1.4945 0.0 0
M  V30 11 C -0.9135 -0.0932 0.0 0
M  V30 12 C 1.732 -0.5 0.0 0
M  V30 13 C -1.0826 -1.7024 0.0 0
M  V30 14 C -1.5826 -0.8364 0.0 0
M  V30 15 O 2.598 0.0 0.0 0
M  V30 16 C 1.732 -1.5 0.0 0
M  V30 17 C 2.598 -1.9999 0.0 0
M  V30 18 C 0.866 -2.0 0.0 0
M  V30 19 C 2.598 -2.9999 0.0 0
M  V30 20 C 0.866 -3.0 0.0 0
M  V30 21 O 3.4641 -3.4999 0.0 0
M  V30 22 N 1.732 -3.5 0.0 0
M  V30 23 C 0.0 -3.5 0.0 0
M  V30 24 C -0.4999 -4.366 0.0 0
M  V30 25 C -0.9999 -3.5 0.0 0
M  V30 END ATOM
M  V30 BEGIN BOND
M  V30 1 1 1 2
M  V30 2 2 2 3
M  V30 3 1 2 4
M  V30 4 1 3 5
M  V30 5 2 4 6
M  V30 6 2 5 7
M  V30 7 1 5 8
M  V30 8 1 8 9
M  V30 9 1 8 10
M  V30 10 1 8 11
M  V30 11 1 9 12
M  V30 12 1 10 13
M  V30 13 1 11 14
M  V30 14 2 12 15
M  V30 15 1 12 16
M  V30 16 2 16 17
M  V30 17 1 16 18
M  V30 18 1 17 19
M  V30 19 2 18 20
M  V30 20 2 19 21
M  V30 21 1 19 22
M  V30 22 1 20 23
M  V30 23 1 23 24
M  V30 24 1 23 25
M  V30 25 1 6 7
M  V30 26 1 13 14
M  V30 27 1 20 22
M  V30 28 1 24 25
M  V30 END BOND
M  V30 END CTAB
M  END
>  <ID>
ZINC000186155122

>  <name>
NA

>  <smiles>
Clc1cccc(c1)C1(CCCC1)NC(=O)c1cc([nH]c(=O)c1)C1CC1

$$$$
ZINC000843720349
Actelion Java MolfileCreator 2.0

  0  0  0  0  0  0              0 V3000
M  V30 BEGIN CTAB
M  V30 COUNTS 25 28 0 0 0
M  V30 BEGIN ATOM
M  V30 1 Cl 1.3256 2.7004 0.0 0
M  V30 2 C 0.5323 2.0916 0.0 0
M  V30 3 C 0.6628 1.1002 0.0 0
M  V30 4 C -0.3915 2.4743 0.0 0
M  V30 5 C -0.1305 0.4914 0.0 0
M  V30 6 C -1.1849 1.8655 0.0 0
M  V30 7 C -1.0544 0.8741 0.0 0
M  V30 8 C 0.0 -0.5 0.0 0
M  V30 9 N 0.866 0.0 0.0 0
M  V30 10 C -0.2588 -1.4659 0.0 0
M  V30 11 C -0.9659 -0.2411 0.0 0
M  V30 12 C 1.732 -0.5 0.0 0
M  V30 13 C -1.2247 -1.2071 0.0 0
M  V30 14 O 1.732 -1.5 0.0 0
M  V30 15 C 2.598 0.0 0.0 0
M  V30 16 C 3.4641 -0.5 0.0 0 CFG=2
M  V30 17 O 3.5686 -1.4945 0.0 0
M  V30 18 C 4.3776 -0.0932 0.0 0
M  V30 19 C 4.5467 -1.7024 0.0 0
M  V30 20 C 5.0467 -0.8364 0.0 0
M  V30 21 C 4.6866 0.8577 0.0 0
M  V30 22 O 4.9535 -2.6159 0.0 0
M  V30 23 C 6.0249 -0.6284 0.0 0
M  V30 24 C 5.6648 1.0657 0.0 0
M  V30 25 C 6.3339 0.3225 0.0 0
M  V30 END ATOM
M  V30 BEGIN BOND
M  V30 1 1 1 2
M  V30 2 2 2 3
M  V30 3 1 2 4
M  V30 4 1 3 5
M  V30 5 2 4 6
M  V30 6 2 5 7
M  V30 7 1 5 8
M  V30 8 1 8 9
M  V30 9 1 8 10
M  V30 10 1 8 11
M  V30 11 1 9 12
M  V30 12 1 10 13
M  V30 13 2 12 14
M  V30 14 1 12 15
M  V30 15 1 16 15 CFG=1
M  V30 16 1 16 17
M  V30 17 1 16 18
M  V30 18 1 17 19
M  V30 19 2 18 20
M  V30 20 1 18 21
M  V30 21 2 19 22
M  V30 22 1 20 23
M  V30 23 2 21 24
M  V30 24 2 23 25
M  V30 25 1 6 7
M  V30 26 1 11 13
M  V30 27 1 19 20
M  V30 28 1 24 25
M  V30 END BOND
M  V30 BEGIN COLLECTION
M  V30 MDLV30/STERAC1 ATOMS=(1 16)
M  V30 END COLLECTION
M  V30 END CTAB
M  END
>  <ID>
ZINC000843720349

>  <name>
NA

>  <smiles>
Clc1cccc(c1)C1(CCC1)NC(=O)CC1OC(=O)c2ccccc12

$$$$
ZINC000664402054
Actelion Java MolfileCreator 2.0

  0  0  0  0  0  0              0 V3000
M  V30 BEGIN CTAB
M  V30 COUNTS 26 29 0 0 0
M  V30 BEGIN ATOM
M  V30 1 O 5.7424 0.737 0.0 0
M  V30 2 C 4.7452 0.6623 0.0 0
M  V30 3 N 4.2452 1.5283 0.0 0
M  V30 4 C 4.3798 -0.2685 0.0 0
M  V30 5 C 3.2563 1.6773 0.0 0
M  V30 6 C 4.8085 2.3545 0.0 0
M  V30 7 C 3.4243 -0.5633 0.0 0
M  V30 8 C 2.5233 0.9972 0.0 0
M  V30 9 N 2.598 0.0 0.0 0
M  V30 10 C 1.732 -0.5 0.0 0
M  V30 11 O 1.732 -1.5 0.0 0
M  V30 12 N 0.866 0.0 0.0 0
M  V30 13 C 0.0 -0.5 0.0 0
M  V30 14 N -0.9135 -0.0932 0.0 0
M  V30 15 C -0.1045 -1.4945 0.0 0
M  V30 16 N -1.5826 -0.8364 0.0 0
M  V30 17 C -1.1214 0.8848 0.0 0
M  V30 18 C -1.0826 -1.7024 0.0 0
M  V30 19 C -0.3783 1.554 0.0 0
M  V30 20 C -2.0725 1.1939 0.0 0
M  V30 21 C -1.4894 -2.6159 0.0 0
M  V30 22 C -0.5862 2.5321 0.0 0
M  V30 23 C -2.2804 2.172 0.0 0
M  V30 24 C -2.2984 -3.2037 0.0 0
M  V30 25 C -1.3848 -3.6105 0.0 0
M  V30 26 C -1.5372 2.8411 0.0 0
M  V30 END ATOM
M  V30 BEGIN BOND
M  V30 1 2 1 2
M  V30 2 1 2 3
M  V30 3 1 2 4
M  V30 4 1 3 5
M  V30 5 1 3 6
M  V30 6 1 4 7
M  V30 7 1 5 8
M  V30 8 1 7 9
M  V30 9 1 9 10
M  V30 10 2 10 11
M  V30 11 1 10 12
M  V30 12 2 12 13 CFG=2
M  V30 13 1 13 14
M  V30 14 1 13 15
M  V30 15 1 14 16
M  V30 16 1 14 17
M  V30 17 2 15 18
M  V30 18 2 17 19
M  V30 19 1 17 20
M  V30 20 1 18 21
M  V30 21 1 19 22
M  V30 22 2 20 23
M  V30 23 1 21 24
M  V30 24 1 21 25
M  V30 25 2 22 26
M  V30 26 1 8 9
M  V30 27 1 16 18
M  V30 28 1 23 26
M  V30 29 1 24 25
M  V30 END BOND
M  V30 END CTAB
M  END
>  <ID>
ZINC000664402054

>  <name>
NA

>  <smiles>
CN1CCN(CCC1=O)C(=O)N=c1cc([nH]n1-c1ccccc1)C1CC1

$$$$
ZINC001331329171
Actelion Java MolfileCreator 2.0

  0  0  0  0  0  0              0 V3000
M  V30 BEGIN CTAB
M  V30 COUNTS 26 29 0 0 0
M  V30 BEGIN ATOM
M  V30 1 F 3.2781 -3.7193 0.0 0
M  V30 2 C 4.222 -2.5536 0.0 0
M  V30 3 C 4.972 -1.2546 0.0 0
M  V30 4 C 2.7548 -2.2417 0.0 0
M  V30 5 C 4.8321 -3.9239 0.0 0
M  V30 6 C 6.4638 -1.0978 0.0 0
M  V30 7 C 3.9683 -0.1398 0.0 0
M  V30 8 N 2.598 -0.75 0.0 0
M  V30 9 O 3.9505 -5.1374 0.0 0
M  V30 10 C 7.3455 -2.3113 0.0 0
M  V30 11 C 7.0739 0.2724 0.0 0
M  V30 12 C 1.299 0.0 0.0 0
M  V30 13 C 8.8373 -2.1545 0.0 0
M  V30 14 C 8.5657 0.4292 0.0 0
M  V30 15 C 0.0 -0.75 0.0 0
M  V30 16 C 9.4474 -0.7842 0.0 0
M  V30 17 N -1.299 0.0 0.0 0
M  V30 18 C 0.0 -2.2499 0.0 0
M  V30 19 C -2.598 -0.7499 0.0 0
M  V30 20 C -1.299 -2.9999 0.0 0
M  V30 21 N -4.0246 -0.2864 0.0 0
M  V30 22 N -2.598 -2.2499 0.0 0
M  V30 23 O -1.299 -4.4999 0.0 0
M  V30 24 C -4.9063 -1.4999 0.0 0
M  V30 25 N -4.0246 -2.7135 0.0 0
M  V30 26 N -6.4063 -1.4999 0.0 0
M  V30 END ATOM
M  V30 BEGIN BOND
M  V30 1 1 1 2
M  V30 2 1 2 3
M  V30 3 1 2 4
M  V30 4 1 2 5
M  V30 5 1 3 6
M  V30 6 1 3 7
M  V30 7 1 4 8
M  V30 8 1 5 9
M  V30 9 2 6 10
M  V30 10 1 6 11
M  V30 11 1 8 12
M  V30 12 1 10 13
M  V30 13 2 11 14
M  V30 14 1 12 15
M  V30 15 2 13 16
M  V30 16 1 15 17
M  V30 17 2 15 18
M  V30 18 1 17 19
M  V30 19 1 18 20
M  V30 20 2 19 21
M  V30 21 1 19 22
M  V30 22 2 20 23
M  V30 23 1 21 24
M  V30 24 1 22 25
M  V30 25 2 24 26
M  V30 26 1 7 8
M  V30 27 1 14 16
M  V30 28 1 20 22
M  V30 29 1 24 25
M  V30 END BOND
M  V30 END CTAB
M  END
>  <ID>
ZINC001331329171

>  <name>
NA

>  <smiles>
OCC1(F)CN(Cc2cc(=O)n3[nH]c(=N)nc3[nH]2)CC1c1ccccc1

$$$$
ZINC000803037956
Actelion Java MolfileCreator 2.0

  0  0  0  0  0  0              0 V3000
M  V30 BEGIN CTAB
M  V30 COUNTS 24 25 0 0 0
M  V30 BEGIN ATOM
M  V30 1 Br 5.1961 -0.5 0.0 0
M  V30 2 C 4.3301 0.0 0.0 0
M  V30 3 C 4.3301 1.0 0.0 0
M  V30 4 C 3.4641 -0.4999 0.0 0
M  V30 5 O 5.1961 1.5 0.0 0
M  V30 6 N 3.4641 1.5 0.0 0
M  V30 7 C 2.598 0.0 0.0 0
M  V30 8 C 2.598 1.0 0.0 0
M  V30 9 C 1.732 -0.5 0.0 0
M  V30 10 C 1.732 1.4999 0.0 0
M  V30 11 O 1.732 -1.5 0.0 0
M  V30 12 N 0.866 0.0 0.0 0
M  V30 13 C 0.0 -0.5 0.0 0
M  V30 14 C -0.866 0.0 0.0 0
M  V30 15 C 0.0 -1.4999 0.0 0
M  V30 16 C -1.732 -0.4999 0.0 0
M  V30 17 C -0.866 1.0 0.0 0 CFG=1
M  V30 18 C -0.866 -1.9999 0.0 0
M  V30 19 C -1.732 -1.4999 0.0 0
M  V30 20 O 0.0 1.5 0.0 0
M  V30 21 C -1.732 1.5 0.0 0
M  V30 22 F -2.232 0.6339 0.0 0
M  V30 23 F -2.598 2.0 0.0 0
M  V30 24 F -1.232 2.366 0.0 0
M  V30 END ATOM
M  V30 BEGIN BOND
M  V30 1 1 1 2
M  V30 2 1 2 3
M  V30 3 2 2 4
M  V30 4 2 3 5
M  V30 5 1 3 6
M  V30 6 1 4 7
M  V30 7 1 6 8
M  V30 8 1 7 9
M  V30 9 1 8 10
M  V30 10 2 9 11
M  V30 11 1 9 12
M  V30 12 1 12 13
M  V30 13 2 13 14
M  V30 14 1 13 15
M  V30 15 1 14 16
M  V30 16 1 17 14
M  V30 17 2 15 18
M  V30 18 2 16 19
M  V30 19 1 17 20 CFG=3
M  V30 20 1 17 21
M  V30 21 1 21 22
M  V30 22 1 21 23
M  V30 23 1 21 24
M  V30 24 2 7 8
M  V30 25 1 18 19
M  V30 END BOND
M  V30 BEGIN COLLECTION
M  V30 MDLV30/STERAC1 ATOMS=(1 17)
M  V30 END COLLECTION
M  V30 END CTAB
M  END
>  <ID>
ZINC000803037956

>  <name>
NA

>  <smiles>
Cc1[nH]c(=O)c(Br)cc1C(=O)Nc1ccccc1C(O)C(F)(F)F

$$$$
ZINC000269486900
Actelion Java MolfileCreator 2.0

  0  0  0  0  0  0              0 V3000
M  V30 BEGIN CTAB
M  V30 COUNTS 22 24 0 0 0
M  V30 BEGIN ATOM
M  V30 1 F 9.0932 -3.0 0.0 0
M  V30 2 C 7.7942 -2.25 0.0 0
M  V30 3 C 7.7942 -0.75 0.0 0
M  V30 4 C 6.4951 -2.9999 0.0 0
M  V30 5 C 6.4951 0.0 0.0 0
M  V30 6 C 5.1961 -2.25 0.0 0
M  V30 7 N 6.4951 1.4999 0.0 0
M  V30 8 C 5.1961 -0.7499 0.0 0
M  V30 9 C 5.1961 2.25 0.0 0
M  V30 10 C 3.8971 0.0 0.0 0
M  V30 11 O 5.1961 3.75 0.0 0
M  V30 12 C 3.8971 1.4999 0.0 0
M  V30 13 C 2.598 -0.75 0.0 0
M  V30 14 O 2.598 -2.25 0.0 0
M  V30 15 N 1.299 0.0 0.0 0
M  V30 16 C 0.0 -0.75 0.0 0
M  V30 17 C -1.299 0.0 0.0 0
M  V30 18 C 0.0 -2.2499 0.0 0
M  V30 19 O -1.299 1.5 0.0 0
M  V30 20 C -2.598 -0.7499 0.0 0
M  V30 21 C -1.299 -2.9999 0.0 0
M  V30 22 C -2.598 -2.2499 0.0 0
M  V30 END ATOM
M  V30 BEGIN BOND
M  V30 1 1 1 2
M  V30 2 2 2 3
M  V30 3 1 2 4
M  V30 4 1 3 5
M  V30 5 2 4 6
M  V30 6 1 5 7
M  V30 7 2 5 8
M  V30 8 1 7 9
M  V30 9 1 8 10
M  V30 10 2 9 11
M  V30 11 1 9 12
M  V30 12 1 10 13
M  V30 13 1 13 14
M  V30 14 1 13 15
M  V30 15 1 15 16
M  V30 16 1 16 17
M  V30 17 1 16 18
M  V30 18 1 17 19
M  V30 19 1 17 20
M  V30 20 1 18 21
M  V30 21 1 20 22
M  V30 22 1 6 8
M  V30 23 2 10 12
M  V30 24 1 21 22
M  V30 END BOND
M  V30 END CTAB
M  END
>  <ID>
ZINC000269486900

>  <name>
NA

>  <smiles>
OC(NC1CCCCC1O)c1cc(=O)[nH]c2cc(F)ccc12

$$$$
ZINC000542595998
Actelion Java MolfileCreator 2.0

  0  0  0  0  0  0              0 V3000
M  V30 BEGIN CTAB
M  V30 COUNTS 23 25 0 0 0
M  V30 BEGIN ATOM
M  V30 1 Br 3.3546 -2.6785 0.0 0
M  V30 2 C 2.516 -2.1339 0.0 0
M  V30 3 C 2.5683 -1.1352 0.0 0
M  V30 4 C 1.625 -2.5879 0.0 0
M  V30 5 C 1.7296 -0.5906 0.0 0
M  V30 6 C 0.7863 -2.0432 0.0 0
M  V30 7 C 0.8386 -1.0446 0.0 0
M  V30 8 C 0.0 -0.5 0.0 0
M  V30 9 N 0.866 0.0 0.0 0
M  V30 10 C -0.9135 -0.0932 0.0 0
M  V30 11 C -0.1045 -1.4945 0.0 0
M  V30 12 C 0.866 0.9999 0.0 0
M  V30 13 C -1.5826 -0.8364 0.0 0
M  V30 14 C -1.0826 -1.7024 0.0 0
M  V30 15 O 1.732 1.4999 0.0 0
M  V30 16 C 0.0 1.5 0.0 0
M  V30 17 C -0.866 1.0 0.0 0
M  V30 18 C 0.0 2.5 0.0 0
M  V30 19 C -1.732 1.4999 0.0 0
M  V30 20 C -0.866 2.9999 0.0 0
M  V30 21 O -2.598 1.0 0.0 0
M  V30 22 N -1.732 2.5 0.0 0
M  V30 23 C -0.866 4.0 0.0 0
M  V30 END ATOM
M  V30 BEGIN BOND
M  V30 1 1 1 2
M  V30 2 2 2 3
M  V30 3 1 2 4
M  V30 4 1 3 5
M  V30 5 2 4 6
M  V30 6 2 5 7
M  V30 7 1 7 8
M  V30 8 1 8 9
M  V30 9 1 8 10
M  V30 10 1 8 11
M  V30 11 1 9 12
M  V30 12 1 10 13
M  V30 13 1 11 14
M  V30 14 2 12 15
M  V30 15 1 12 16
M  V30 16 1 16 17
M  V30 17 1 16 18
M  V30 18 1 17 19
M  V30 19 1 18 20
M  V30 20 2 19 21
M  V30 21 1 19 22
M  V30 22 1 20 23
M  V30 23 1 6 7
M  V30 24 1 13 14
M  V30 25 1 20 22
M  V30 END BOND
M  V30 END CTAB
M  END
>  <ID>
ZINC000542595998

>  <name>
NA

>  <smiles>
CC1CC(CC(=O)N1)C(=O)NC1(CCCC1)c1ccc(Br)cc1

$$$$
ZINC000777458120
Actelion Java MolfileCreator 2.0

  0  0  0  0  0  0              0 V3000
M  V30 BEGIN CTAB
M  V30 COUNTS 24 25 0 0 0
M  V30 BEGIN ATOM
M  V30 1 F 6.2942 3.75 0.0 0
M  V30 2 C 7.7942 3.75 0.0 0
M  V30 3 F 7.7942 5.25 0.0 0
M  V30 4 F 9.2942 3.75 0.0 0
M  V30 5 C 7.7942 2.25 0.0 0
M  V30 6 C 6.4952 1.5 0.0 0
M  V30 7 C 9.0932 1.5 0.0 0
M  V30 8 C 6.4952 0.0 0.0 0
M  V30 9 C 9.0932 0.0 0.0 0
M  V30 10 C 7.7942 -0.75 0.0 0
M  V30 11 C 5.1961 -0.75 0.0 0 CFG=1
M  V30 12 O 4.4461 -2.049 0.0 0
M  V30 13 C 3.8971 0.0 0.0 0
M  V30 14 C 5.9461 -2.049 0.0 0
M  V30 15 O 3.8971 1.5 0.0 0
M  V30 16 N 2.598 -0.75 0.0 0
M  V30 17 C 1.299 0.0 0.0 0
M  V30 18 C 0.0 -0.75 0.0 0
M  V30 19 N -1.299 0.0 0.0 0
M  V30 20 C 0.0 -2.25 0.0 0
M  V30 21 C -2.598 -0.75 0.0 0
M  V30 22 C -1.299 -3.0 0.0 0
M  V30 23 O -3.8971 0.0 0.0 0
M  V30 24 C -2.598 -2.25 0.0 0
M  V30 END ATOM
M  V30 BEGIN BOND
M  V30 1 1 1 2
M  V30 2 1 2 3
M  V30 3 1 2 4
M  V30 4 1 2 5
M  V30 5 2 5 6
M  V30 6 1 5 7
M  V30 7 1 6 8
M  V30 8 2 7 9
M  V30 9 2 8 10
M  V30 10 1 11 8
M  V30 11 1 11 12 CFG=1
M  V30 12 1 11 13
M  V30 13 1 11 14
M  V30 14 2 13 15
M  V30 15 1 13 16
M  V30 16 1 16 17
M  V30 17 1 17 18
M  V30 18 1 18 19
M  V30 19 2 18 20
M  V30 20 1 19 21
M  V30 21 1 20 22
M  V30 22 2 21 23
M  V30 23 1 21 24
M  V30 24 1 9 10
M  V30 25 2 22 24
M  V30 END BOND
M  V30 BEGIN COLLECTION
M  V30 MDLV30/STERAC1 ATOMS=(1 11)
M  V30 END COLLECTION
M  V30 END CTAB
M  END
>  <ID>
ZINC000777458120

>  <name>
NA

>  <smiles>
CC(O)(C(=O)NCc1cccc(=O)[nH]1)c1cccc(c1)C(F)(F)F

$$$$
ZINC001119983313
Actelion Java MolfileCreator 2.0

  0  0  0  0  0  0              0 V3000
M  V30 BEGIN CTAB
M  V30 COUNTS 26 28 0 0 0
M  V30 BEGIN ATOM
M  V30 1 O 9.0932 -3.0 0.0 0
M  V30 2 C 7.7942 -2.2499 0.0 0
M  V30 3 N 7.7942 -0.75 0.0 0
M  V30 4 C 6.4951 -2.9999 0.0 0
M  V30 5 N 6.4951 0.0 0.0 0
M  V30 6 C 9.0932 0.0 0.0 0
M  V30 7 C 5.1961 -2.25 0.0 0
M  V30 8 C 5.1961 -0.75 0.0 0
M  V30 9 C 10.3923 -0.75 0.0 0
M  V30 10 C 9.0932 1.4999 0.0 0
M  V30 11 C 3.8971 0.0 0.0 0 CFG=2
M  V30 12 C 11.6913 0.0 0.0 0
M  V30 13 C 10.3923 2.2499 0.0 0
M  V30 14 O 3.8971 1.5 0.0 0
M  V30 15 N 2.598 -0.75 0.0 0
M  V30 16 C 11.6913 1.4999 0.0 0
M  V30 17 C 12.9903 -0.75 0.0 0
M  V30 18 C 1.299 0.0 0.0 0
M  V30 19 C 2.598 -2.25 0.0 0
M  V30 20 C 0.0 -0.75 0.0 0
M  V30 21 N -1.299 0.0 0.0 0
M  V30 22 C 0.0 -2.2499 0.0 0
M  V30 23 C -2.598 -0.7499 0.0 0
M  V30 24 C -1.299 -2.9999 0.0 0
M  V30 25 O -3.8971 0.0 0.0 0
M  V30 26 C -2.598 -2.2499 0.0 0
M  V30 END ATOM
M  V30 BEGIN BOND
M  V30 1 2 1 2
M  V30 2 1 2 3
M  V30 3 1 2 4
M  V30 4 1 3 5
M  V30 5 1 3 6
M  V30 6 2 4 7
M  V30 7 2 5 8
M  V30 8 2 6 9
M  V30 9 1 6 10
M  V30 10 1 11 8
M  V30 11 1 9 12
M  V30 12 2 10 13
M  V30 13 1 11 14 CFG=1
M  V30 14 1 11 15
M  V30 15 2 12 16
M  V30 16 1 12 17
M  V30 17 1 15 18
M  V30 18 1 15 19
M  V30 19 1 18 20
M  V30 20 1 20 21
M  V30 21 2 20 22
M  V30 22 1 21 23
M  V30 23 1 22 24
M  V30 24 2 23 25
M  V30 25 1 23 26
M  V30 26 1 7 8
M  V30 27 1 13 16
M  V30 28 2 24 26
M  V30 END BOND
M  V30 BEGIN COLLECTION
M  V30 MDLV30/STERAC1 ATOMS=(1 11)
M  V30 END COLLECTION
M  V30 END CTAB
M  END
>  <ID>
ZINC001119983313

>  <name>
NA

>  <smiles>
CN(Cc1cccc(=O)[nH]1)C(O)c1ccc(=O)n(n1)-c1cccc(C)c1

$$$$
ZINC000582250643
Actelion Java MolfileCreator 2.0

  0  0  0  0  0  0              0 V3000
M  V30 BEGIN CTAB
M  V30 COUNTS 24 26 0 0 0
M  V30 BEGIN ATOM
M  V30 1 O 7.7942 -0.75 0.0 0
M  V30 2 C 6.4951 0.0 0.0 0
M  V30 3 N 6.4951 1.5 0.0 0
M  V30 4 C 5.1961 -0.7499 0.0 0
M  V30 5 C 5.1961 2.25 0.0 0
M  V30 6 C 3.8971 0.0 0.0 0
M  V30 7 C 3.8971 1.5 0.0 0
M  V30 8 C 5.1961 3.75 0.0 0
M  V30 9 C 2.598 -0.75 0.0 0
M  V30 10 C 3.8971 4.5 0.0 0
M  V30 11 O 2.598 -2.25 0.0 0
M  V30 12 N 1.299 0.0 0.0 0
M  V30 13 C 0.0 -0.75 0.0 0
M  V30 14 C -1.3703 -0.1398 0.0 0
M  V30 15 C -0.1567 -2.2417 0.0 0
M  V30 16 N -2.374 -1.2546 0.0 0
M  V30 17 C -1.6821 1.3273 0.0 0
M  V30 18 N -1.624 -2.5536 0.0 0
M  V30 19 C -0.6784 2.442 0.0 0
M  V30 20 C -3.0525 1.9374 0.0 0
M  V30 21 C -2.2341 -3.9239 0.0 0
M  V30 22 N -1.4284 3.741 0.0 0
M  V30 23 N -2.8957 3.4292 0.0 0
M  V30 24 C -4.0104 4.4329 0.0 0
M  V30 END ATOM
M  V30 BEGIN BOND
M  V30 1 2 1 2
M  V30 2 1 2 3
M  V30 3 1 2 4
M  V30 4 1 3 5
M  V30 5 1 4 6
M  V30 6 1 5 7
M  V30 7 1 5 8
M  V30 8 1 6 9
M  V30 9 1 8 10
M  V30 10 2 9 11
M  V30 11 1 9 12
M  V30 12 1 12 13
M  V30 13 1 13 14
M  V30 14 2 13 15
M  V30 15 2 14 16
M  V30 16 1 14 17
M  V30 17 1 15 18
M  V30 18 1 17 19
M  V30 19 2 17 20
M  V30 20 1 18 21
M  V30 21 2 19 22
M  V30 22 1 20 23
M  V30 23 1 23 24
M  V30 24 1 6 7
M  V30 25 1 16 18
M  V30 26 1 22 23
M  V30 END BOND
M  V30 END CTAB
M  END
>  <ID>
ZINC000582250643

>  <name>
NA

>  <smiles>
CCC1CC(CC(=O)N1)C(=O)Nc1cn(C)nc1-c1cnn(C)c1

$$$$
ZINC000621273622
Actelion Java MolfileCreator 2.0

  0  0  0  0  0  0              0 V3000
M  V30 BEGIN CTAB
M  V30 COUNTS 26 28 0 0 0
M  V30 BEGIN ATOM
M  V30 1 Cl 3.4641 -4.5 0.0 0
M  V30 2 C 3.4641 -3.5 0.0 0
M  V30 3 C 4.3301 -3.0 0.0 0
M  V30 4 C 2.598 -3.0 0.0 0
M  V30 5 C 4.3301 -1.9999 0.0 0
M  V30 6 C 2.598 -2.0 0.0 0
M  V30 7 C 3.4641 -1.5 0.0 0
M  V30 8 C 3.4641 -0.5 0.0 0 CFG=1
M  V30 9 N 4.3301 0.0 0.0 0
M  V30 10 C 2.598 0.0 0.0 0
M  V30 11 C 5.1961 -0.5 0.0 0
M  V30 12 C 1.732 -0.5 0.0 0
M  V30 13 C 6.0621 0.0 0.0 0
M  V30 14 C 0.866 0.0 0.0 0
M  V30 15 N 6.9282 -0.5 0.0 0
M  V30 16 C 6.0621 0.9999 0.0 0
M  V30 17 C 0.866 1.0 0.0 0
M  V30 18 C 0.0 -0.5 0.0 0
M  V30 19 C 7.7942 0.0 0.0 0
M  V30 20 C 6.9282 1.4999 0.0 0
M  V30 21 N 8.7452 -0.309 0.0 0
M  V30 22 N 7.7942 0.9999 0.0 0
M  V30 23 O 6.9282 2.4999 0.0 0
M  V30 24 C 9.333 0.4999 0.0 0
M  V30 25 N 8.7452 1.309 0.0 0
M  V30 26 N 10.333 0.4999 0.0 0
M  V30 END ATOM
M  V30 BEGIN BOND
M  V30 1 1 1 2
M  V30 2 2 2 3
M  V30 3 1 2 4
M  V30 4 1 3 5
M  V30 5 2 4 6
M  V30 6 2 5 7
M  V30 7 1 8 7
M  V30 8 1 8 9 CFG=3
M  V30 9 1 8 10
M  V30 10 1 9 11
M  V30 11 1 10 12
M  V30 12 1 11 13
M  V30 13 1 12 14
M  V30 14 1 13 15
M  V30 15 2 13 16
M  V30 16 1 14 17
M  V30 17 1 14 18
M  V30 18 1 15 19
M  V30 19 1 16 20
M  V30 20 2 19 21
M  V30 21 1 19 22
M  V30 22 2 20 23
M  V30 23 1 21 24
M  V30 24 1 22 25
M  V30 25 2 24 26
M  V30 26 1 6 7
M  V30 27 1 20 22
M  V30 28 1 24 25
M  V30 END BOND
M  V30 BEGIN COLLECTION
M  V30 MDLV30/STERAC1 ATOMS=(1 8)
M  V30 END COLLECTION
M  V30 END CTAB
M  END
>  <ID>
ZINC000621273622

>  <name>
NA

>  <smiles>
CC(C)CCC(NCc1cc(=O)n2[nH]c(=N)nc2[nH]1)c1ccc(Cl)cc1

$$$$
ZINC000680344396
Actelion Java MolfileCreator 2.0

  0  0  0  0  0  0              0 V3000
M  V30 BEGIN CTAB
M  V30 COUNTS 24 26 0 0 0
M  V30 BEGIN ATOM
M  V30 1 O 3.8971 5.9999 0.0 0
M  V30 2 C 3.8971 4.4999 0.0 0
M  V30 3 N 5.1961 3.7499 0.0 0
M  V30 4 C 2.598 3.75 0.0 0
M  V30 5 C 5.1961 2.2499 0.0 0
M  V30 6 C 2.598 2.2499 0.0 0
M  V30 7 C 3.8971 1.4999 0.0 0
M  V30 8 C 6.4951 1.4999 0.0 0
M  V30 9 C 1.299 1.4999 0.0 0
M  V30 10 C 6.4951 0.0 0.0 0
M  V30 11 O 0.0 2.25 0.0 0
M  V30 12 N 1.299 0.0 0.0 0
M  V30 13 C 0.0 -0.75 0.0 0
M  V30 14 C 1.258 -1.5669 0.0 0
M  V30 15 C -1.3703 -0.1398 0.0 0
M  V30 16 C -0.1567 -2.2417 0.0 0
M  V30 17 C 1.1795 -3.0649 0.0 0
M  V30 18 C 2.5945 -0.8859 0.0 0
M  V30 19 C -2.374 -1.2546 0.0 0
M  V30 20 C -1.624 -2.5536 0.0 0
M  V30 21 C 2.4375 -3.8818 0.0 0
M  V30 22 C 3.8525 -1.7029 0.0 0
M  V30 23 C 3.774 -3.2008 0.0 0
M  V30 24 C 2.359 -5.3798 0.0 0
M  V30 END ATOM
M  V30 BEGIN BOND
M  V30 1 2 1 2
M  V30 2 1 2 3
M  V30 3 1 2 4
M  V30 4 1 3 5
M  V30 5 1 4 6
M  V30 6 1 5 7
M  V30 7 1 5 8
M  V30 8 1 6 9
M  V30 9 1 8 10
M  V30 10 2 9 11
M  V30 11 1 9 12
M  V30 12 1 12 13
M  V30 13 1 13 14
M  V30 14 1 13 15
M  V30 15 1 13 16
M  V30 16 2 14 17
M  V30 17 1 14 18
M  V30 18 1 15 19
M  V30 19 1 16 20
M  V30 20 1 17 21
M  V30 21 2 18 22
M  V30 22 2 21 23
M  V30 23 1 21 24
M  V30 24 1 6 7
M  V30 25 1 19 20
M  V30 26 1 22 23
M  V30 END BOND
M  V30 END CTAB
M  END
>  <ID>
ZINC000680344396

>  <name>
NA

>  <smiles>
CCC1CC(CC(=O)N1)C(=O)NC1(CCCC1)c1cccc(C)c1

$$$$
ZINC000346057845
Actelion Java MolfileCreator 2.0

  0  0  0  0  0  0              0 V3000
M  V30 BEGIN CTAB
M  V30 COUNTS 23 24 0 0 0
M  V30 BEGIN ATOM
M  V30 1 O 2.8289 5.9363 0.0 0
M  V30 2 C 2.621 4.9582 0.0 0
M  V30 3 N 1.6699 4.6491 0.0 0
M  V30 4 C 3.3641 4.289 0.0 0
M  V30 5 C 1.462 3.671 0.0 0
M  V30 6 C 3.1562 3.3109 0.0 0
M  V30 7 C 2.2052 3.0019 0.0 0
M  V30 8 C 0.511 3.362 0.0 0
M  V30 9 C 3.8994 2.6418 0.0 0
M  V30 10 C 0.3031 2.3838 0.0 0
M  V30 11 O 4.8504 2.9508 0.0 0
M  V30 12 N 3.6915 1.6636 0.0 0
M  V30 13 C 4.4346 0.9945 0.0 0
M  V30 14 N 4.3301 0.0 0.0 0
M  V30 15 C 5.4128 1.2024 0.0 0
M  V30 16 N 5.2436 -0.4067 0.0 0
M  V30 17 C 3.4641 -0.5 0.0 0
M  V30 18 C 5.9128 0.3364 0.0 0
M  V30 19 C 2.598 0.0 0.0 0
M  V30 20 C 6.9073 0.2318 0.0 0
M  V30 21 C 1.732 -0.5 0.0 0
M  V30 22 C 0.866 0.0 0.0 0
M  V30 23 C 0.0 -0.5 0.0 0
M  V30 END ATOM
M  V30 BEGIN BOND
M  V30 1 2 1 2
M  V30 2 1 2 3
M  V30 3 1 2 4
M  V30 4 1 3 5
M  V30 5 1 4 6
M  V30 6 1 5 7
M  V30 7 1 5 8
M  V30 8 1 6 9
M  V30 9 1 8 10
M  V30 10 2 9 11
M  V30 11 1 9 12
M  V30 12 2 12 13 CFG=2
M  V30 13 1 13 14
M  V30 14 1 13 15
M  V30 15 1 14 16
M  V30 16 1 14 17
M  V30 17 2 15 18
M  V30 18 1 17 19
M  V30 19 1 18 20
M  V30 20 1 19 21
M  V30 21 1 21 22
M  V30 22 1 22 23
M  V30 23 1 6 7
M  V30 24 1 16 18
M  V30 END BOND
M  V30 END CTAB
M  END
>  <ID>
ZINC000346057845

>  <name>
NA

>  <smiles>
CCCCCn1[nH]c(C)cc1=NC(=O)C1CC(CC)NC(=O)C1

$$$$
ZINC001080612453
Actelion Java MolfileCreator 2.0

  0  0  0  0  0  0              0 V3000
M  V30 BEGIN CTAB
M  V30 COUNTS 26 28 0 0 0
M  V30 BEGIN ATOM
M  V30 1 O 4.0036 -6.8701 0.0 0
M  V30 2 C 4.5914 -6.0611 0.0 0
M  V30 3 N 5.5859 -6.1656 0.0 0
M  V30 4 C 4.1846 -5.1475 0.0 0
M  V30 5 C 6.1737 -5.3566 0.0 0
M  V30 6 C 4.7724 -4.3385 0.0 0
M  V30 7 O 7.1682 -5.4611 0.0 0
M  V30 8 C 5.7669 -4.443 0.0 0
M  V30 9 C 4.3657 -3.4249 0.0 0
M  V30 10 O 3.3712 -3.3204 0.0 0
M  V30 11 N 4.9535 -2.6159 0.0 0
M  V30 12 C 4.5467 -1.7024 0.0 0
M  V30 13 C 5.0467 -0.8364 0.0 0
M  V30 14 C 3.5686 -1.4945 0.0 0
M  V30 15 C 4.3776 -0.0932 0.0 0
M  V30 16 C 6.0412 -0.7318 0.0 0
M  V30 17 N 3.4641 -0.5 0.0 0
M  V30 18 C 2.598 0.0 0.0 0
M  V30 19 C 1.732 -0.5 0.0 0
M  V30 20 O 1.732 -1.5 0.0 0
M  V30 21 C 0.866 0.0 0.0 0
M  V30 22 N 0.0 -0.5 0.0 0
M  V30 23 N -0.9135 -0.0932 0.0 0
M  V30 24 C -0.1045 -1.4945 0.0 0
M  V30 25 C -1.5826 -0.8364 0.0 0
M  V30 26 C -1.0826 -1.7024 0.0 0
M  V30 END ATOM
M  V30 BEGIN BOND
M  V30 1 2 1 2
M  V30 2 1 2 3
M  V30 3 1 2 4
M  V30 4 1 3 5
M  V30 5 2 4 6
M  V30 6 1 5 7
M  V30 7 2 5 8
M  V30 8 1 6 9
M  V30 9 1 9 10
M  V30 10 1 9 11
M  V30 11 1 11 12
M  V30 12 1 12 13
M  V30 13 1 12 14
M  V30 14 1 13 15
M  V30 15 1 13 16
M  V30 16 1 14 17
M  V30 17 1 17 18
M  V30 18 1 18 19
M  V30 19 1 19 20
M  V30 20 1 19 21
M  V30 21 1 21 22
M  V30 22 1 22 23
M  V30 23 1 22 24
M  V30 24 2 23 25
M  V30 25 2 24 26
M  V30 26 1 6 8
M  V30 27 1 15 17
M  V30 28 1 25 26
M  V30 END BOND
M  V30 END CTAB
M  END
>  <ID>
ZINC001080612453

>  <name>
NA

>  <smiles>
CC1CN(CC(O)Cn2cccn2)CC1NC(O)c1cc(O)[nH]c(=O)c1

$$$$
ZINC000544552417
Actelion Java MolfileCreator 2.0

  0  0  0  0  0  0              0 V3000
M  V30 BEGIN CTAB
M  V30 COUNTS 26 28 0 0 0
M  V30 BEGIN ATOM
M  V30 1 O 2.598 3.9999 0.0 0
M  V30 2 C 2.598 2.9999 0.0 0
M  V30 3 N 3.4641 2.4999 0.0 0
M  V30 4 C 1.732 2.4999 0.0 0
M  V30 5 C 3.4641 1.4999 0.0 0
M  V30 6 C 1.732 1.4999 0.0 0
M  V30 7 C 2.598 0.9999 0.0 0
M  V30 8 C 4.3301 0.9999 0.0 0
M  V30 9 C 0.866 0.9999 0.0 0
M  V30 10 O 0.0 1.5 0.0 0
M  V30 11 N 0.866 0.0 0.0 0
M  V30 12 C 0.0 -0.5 0.0 0
M  V30 13 C 0.8386 -1.0446 0.0 0
M  V30 14 C -0.9135 -0.0932 0.0 0
M  V30 15 C -0.1045 -1.4945 0.0 0
M  V30 16 C 0.7863 -2.0432 0.0 0
M  V30 17 C 1.7296 -0.5906 0.0 0
M  V30 18 C -1.5826 -0.8364 0.0 0
M  V30 19 C -1.0826 -1.7024 0.0 0
M  V30 20 C 1.625 -2.5879 0.0 0
M  V30 21 C 2.5683 -1.1352 0.0 0
M  V30 22 C 2.516 -2.1339 0.0 0
M  V30 23 C 3.3546 -2.6785 0.0 0
M  V30 24 C 3.8993 -1.8398 0.0 0
M  V30 25 C 4.1933 -3.2231 0.0 0
M  V30 26 C 2.81 -3.5172 0.0 0
M  V30 END ATOM
M  V30 BEGIN BOND
M  V30 1 2 1 2
M  V30 2 1 2 3
M  V30 3 1 2 4
M  V30 4 1 3 5
M  V30 5 1 4 6
M  V30 6 1 5 7
M  V30 7 1 5 8
M  V30 8 1 6 9
M  V30 9 2 9 10
M  V30 10 1 9 11
M  V30 11 1 11 12
M  V30 12 1 12 13
M  V30 13 1 12 14
M  V30 14 1 12 15
M  V30 15 2 13 16
M  V30 16 1 13 17
M  V30 17 1 14 18
M  V30 18 1 15 19
M  V30 19 1 16 20
M  V30 20 2 17 21
M  V30 21 2 20 22
M  V30 22 1 22 23
M  V30 23 1 23 24
M  V30 24 1 23 25
M  V30 25 1 23 26
M  V30 26 1 6 7
M  V30 27 1 18 19
M  V30 28 1 21 22
M  V30 END BOND
M  V30 END CTAB
M  END
>  <ID>
ZINC000544552417

>  <name>
NA

>  <smiles>
CC1CC(CC(=O)N1)C(=O)NC1(CCCC1)c1ccc(cc1)C(C)(C)C

$$$$
ZINC001367151521
Actelion Java MolfileCreator 2.0

  0  0  0  0  0  0              0 V3000
M  V30 BEGIN CTAB
M  V30 COUNTS 24 26 0 0 0
M  V30 BEGIN ATOM
M  V30 1 O 3.5385 -7.6947 0.0 0
M  V30 2 C 3.617 -6.1967 0.0 0
M  V30 3 N 4.9535 -5.5157 0.0 0
M  V30 4 C 2.359 -5.3798 0.0 0
M  V30 5 C 5.032 -4.0178 0.0 0
M  V30 6 C 2.4375 -3.8818 0.0 0 CFG=2
M  V30 7 C 3.774 -3.2008 0.0 0
M  V30 8 C 1.1795 -3.0649 0.0 0
M  V30 9 O -0.157 -3.7458 0.0 0
M  V30 10 N 1.258 -1.5669 0.0 0
M  V30 11 C 0.0 -0.75 0.0 0
M  V30 12 C -1.3703 -0.1398 0.0 0
M  V30 13 C -0.1567 -2.2417 0.0 0
M  V30 14 C 1.299 0.0 0.0 0
M  V30 15 C -2.374 -1.2546 0.0 0
M  V30 16 C -1.624 -2.5536 0.0 0
M  V30 17 N 2.598 -0.75 0.0 0
M  V30 18 C 3.8971 0.0 0.0 0
M  V30 19 C 5.1961 -0.75 0.0 0
M  V30 20 N 5.3529 -2.2417 0.0 0
M  V30 21 C 6.5664 -0.1398 0.0 0
M  V30 22 C 6.8201 -2.5536 0.0 0
M  V30 23 O 7.5701 -1.2546 0.0 0
M  V30 24 C 7.4302 -3.9239 0.0 0
M  V30 END ATOM
M  V30 BEGIN BOND
M  V30 1 2 1 2
M  V30 2 1 2 3
M  V30 3 1 2 4
M  V30 4 1 3 5
M  V30 5 1 6 4
M  V30 6 1 5 7
M  V30 7 1 6 8 CFG=1
M  V30 8 2 8 9
M  V30 9 1 8 10
M  V30 10 1 10 11
M  V30 11 1 11 12
M  V30 12 1 11 13
M  V30 13 1 11 14
M  V30 14 1 12 15
M  V30 15 1 13 16
M  V30 16 1 14 17
M  V30 17 1 17 18
M  V30 18 1 18 19
M  V30 19 1 19 20
M  V30 20 2 19 21
M  V30 21 2 20 22
M  V30 22 1 21 23
M  V30 23 1 22 24
M  V30 24 1 6 7
M  V30 25 1 15 16
M  V30 26 1 22 23
M  V30 END BOND
M  V30 BEGIN COLLECTION
M  V30 MDLV30/STERAC1 ATOMS=(1 6)
M  V30 END COLLECTION
M  V30 END CTAB
M  END
>  <ID>
ZINC001367151521

>  <name>
NA

>  <smiles>
Cc1nc(CNCC2(CCCC2)NC(=O)C2CCNC(=O)C2)co1

$$$$
ZINC000098043345
Actelion Java MolfileCreator 2.0

  0  0  0  0  0  0              0 V3000
M  V30 BEGIN CTAB
M  V30 COUNTS 25 25 0 0 0
M  V30 BEGIN ATOM
M  V30 1 O 5.1961 1.4999 0.0 0
M  V30 2 C 6.0621 0.9999 0.0 0
M  V30 3 O 6.9282 1.4999 0.0 0
M  V30 4 C 6.0621 0.0 0.0 0
M  V30 5 C 7.7942 0.9999 0.0 0
M  V30 6 N 5.1961 -0.5 0.0 0
M  V30 7 C 6.9282 -0.4999 0.0 0
M  V30 8 C 4.3301 0.0 0.0 0
M  V30 9 C 7.7942 0.0 0.0 0
M  V30 10 O 4.3301 1.0 0.0 0
M  V30 11 C 3.4641 -0.5 0.0 0
M  V30 12 C 8.6602 -0.4999 0.0 0
M  V30 13 N 2.598 0.0 0.0 0
M  V30 14 C 3.4641 -1.5 0.0 0
M  V30 15 C 9.5262 0.0 0.0 0
M  V30 16 C 1.732 -0.5 0.0 0
M  V30 17 C 4.3301 -2.0 0.0 0
M  V30 18 N 10.3923 -0.5 0.0 0
M  V30 19 O 1.732 -1.5 0.0 0
M  V30 20 C 0.866 0.0 0.0 0
M  V30 21 N 4.4346 -2.9945 0.0 0
M  V30 22 C 5.2436 -1.5932 0.0 0
M  V30 23 N 0.0 -0.5 0.0 0
M  V30 24 C 5.4128 -3.2024 0.0 0
M  V30 25 N 5.9128 -2.3364 0.0 0
M  V30 END ATOM
M  V30 BEGIN BOND
M  V30 1 2 1 2
M  V30 2 1 2 3
M  V30 3 1 2 4
M  V30 4 1 3 5
M  V30 5 1 4 6
M  V30 6 1 4 7
M  V30 7 1 6 8
M  V30 8 1 7 9
M  V30 9 2 8 10
M  V30 10 1 8 11
M  V30 11 1 9 12
M  V30 12 1 11 13
M  V30 13 1 11 14
M  V30 14 1 12 15
M  V30 15 1 13 16
M  V30 16 1 14 17
M  V30 17 1 15 18
M  V30 18 2 16 19
M  V30 19 1 16 20
M  V30 20 1 17 21
M  V30 21 2 17 22
M  V30 22 1 20 23
M  V30 23 2 21 24
M  V30 24 1 22 25
M  V30 25 1 24 25
M  V30 END BOND
M  V30 END CTAB
M  END
>  <ID>
ZINC000098043345

>  <name>
NA

>  <smiles>
COC(=O)C(CCCCN)NC(=O)C(Cc1c[nH]cn1)NC(=O)CN

$$$$
ZINC000680344398
Actelion Java MolfileCreator 2.0

  0  0  0  0  0  0              0 V3000
M  V30 BEGIN CTAB
M  V30 COUNTS 24 26 0 0 0
M  V30 BEGIN ATOM
M  V30 1 O 3.8971 5.9999 0.0 0
M  V30 2 C 3.8971 4.4999 0.0 0
M  V30 3 N 5.1961 3.7499 0.0 0
M  V30 4 C 2.598 3.75 0.0 0
M  V30 5 C 5.1961 2.2499 0.0 0
M  V30 6 C 2.598 2.2499 0.0 0
M  V30 7 C 3.8971 1.4999 0.0 0
M  V30 8 C 6.4951 1.4999 0.0 0
M  V30 9 C 1.299 1.4999 0.0 0
M  V30 10 C 6.4951 0.0 0.0 0
M  V30 11 O 0.0 2.25 0.0 0
M  V30 12 N 1.299 0.0 0.0 0
M  V30 13 C 0.0 -0.75 0.0 0
M  V30 14 C 1.258 -1.5669 0.0 0
M  V30 15 C -1.3703 -0.1398 0.0 0
M  V30 16 C -0.1567 -2.2417 0.0 0
M  V30 17 C 1.1795 -3.0649 0.0 0
M  V30 18 C 2.5945 -0.8859 0.0 0
M  V30 19 C -2.374 -1.2546 0.0 0
M  V30 20 C -1.624 -2.5536 0.0 0
M  V30 21 C 2.4375 -3.8818 0.0 0
M  V30 22 C 3.8525 -1.7029 0.0 0
M  V30 23 C 3.774 -3.2008 0.0 0
M  V30 24 C 2.359 -5.3798 0.0 0
M  V30 END ATOM
M  V30 BEGIN BOND
M  V30 1 2 1 2
M  V30 2 1 2 3
M  V30 3 1 2 4
M  V30 4 1 3 5
M  V30 5 1 4 6
M  V30 6 1 5 7
M  V30 7 1 5 8
M  V30 8 1 6 9
M  V30 9 1 8 10
M  V30 10 2 9 11
M  V30 11 1 9 12
M  V30 12 1 12 13
M  V30 13 1 13 14
M  V30 14 1 13 15
M  V30 15 1 13 16
M  V30 16 2 14 17
M  V30 17 1 14 18
M  V30 18 1 15 19
M  V30 19 1 16 20
M  V30 20 1 17 21
M  V30 21 2 18 22
M  V30 22 2 21 23
M  V30 23 1 21 24
M  V30 24 1 6 7
M  V30 25 1 19 20
M  V30 26 1 22 23
M  V30 END BOND
M  V30 END CTAB
M  END
>  <ID>
ZINC000680344398

>  <name>
NA

>  <smiles>
CCC1CC(CC(=O)N1)C(=O)NC1(CCCC1)c1cccc(C)c1

$$$$
ZINC000543553132
Actelion Java MolfileCreator 2.0

  0  0  0  0  0  0              0 V3000
M  V30 BEGIN CTAB
M  V30 COUNTS 24 26 0 0 0
M  V30 BEGIN ATOM
M  V30 1 S 2.7026 0.9945 0.0 0
M  V30 2 C 2.598 0.0 0.0 0
M  V30 3 C 3.6807 1.2024 0.0 0
M  V30 4 N 1.732 -0.5 0.0 0
M  V30 5 C 3.5116 -0.4067 0.0 0
M  V30 6 N 4.1807 0.3364 0.0 0
M  V30 7 C 4.0874 2.1159 0.0 0
M  V30 8 C 0.866 0.0 0.0 0
M  V30 9 C 3.7195 -1.3848 0.0 0
M  V30 10 O 0.866 1.0 0.0 0
M  V30 11 C 0.0 -0.5 0.0 0
M  V30 12 C 2.9763 -2.054 0.0 0
M  V30 13 C 4.6705 -1.6939 0.0 0
M  V30 14 C -0.866 0.0 0.0 0
M  V30 15 C 0.0 -1.4999 0.0 0
M  V30 16 C 3.1843 -3.0321 0.0 0
M  V30 17 C 4.8785 -2.672 0.0 0
M  V30 18 C -1.732 -0.4999 0.0 0
M  V30 19 C -0.866 -1.9999 0.0 0
M  V30 20 C 4.1353 -3.3411 0.0 0
M  V30 21 O -2.598 0.0 0.0 0
M  V30 22 N -1.732 -1.4999 0.0 0
M  V30 23 C -0.866 -2.9999 0.0 0
M  V30 24 C 0.0 -3.4999 0.0 0
M  V30 END ATOM
M  V30 BEGIN BOND
M  V30 1 1 1 2
M  V30 2 1 1 3
M  V30 3 1 2 4
M  V30 4 2 2 5
M  V30 5 2 3 6
M  V30 6 1 3 7
M  V30 7 1 4 8
M  V30 8 1 5 9
M  V30 9 2 8 10
M  V30 10 1 8 11
M  V30 11 2 9 12
M  V30 12 1 9 13
M  V30 13 1 11 14
M  V30 14 1 11 15
M  V30 15 1 12 16
M  V30 16 2 13 17
M  V30 17 1 14 18
M  V30 18 1 15 19
M  V30 19 2 16 20
M  V30 20 2 18 21
M  V30 21 1 18 22
M  V30 22 1 19 23
M  V30 23 1 23 24
M  V30 24 1 5 6
M  V30 25 1 17 20
M  V30 26 1 19 22
M  V30 END BOND
M  V30 END CTAB
M  END
>  <ID>
ZINC000543553132

>  <name>
NA

>  <smiles>
CCC1CC(CC(=O)N1)C(=O)Nc1sc(C)nc1-c1ccccc1

$$$$
ZINC000622192481
Actelion Java MolfileCreator 2.0

  0  0  0  0  0  0              0 V3000
M  V30 BEGIN CTAB
M  V30 COUNTS 24 26 0 0 0
M  V30 BEGIN ATOM
M  V30 1 F 3.7821 -2.1416 0.0 0
M  V30 2 C 3.1734 -2.935 0.0 0
M  V30 3 F 3.9667 -3.5438 0.0 0
M  V30 4 F 2.5646 -3.7283 0.0 0
M  V30 5 C 2.38 -2.3262 0.0 0
M  V30 6 C 2.5105 -1.3348 0.0 0
M  V30 7 C 1.4561 -2.7089 0.0 0
M  V30 8 C 1.7172 -0.726 0.0 0
M  V30 9 C 0.6628 -2.1002 0.0 0
M  V30 10 C 0.7933 -1.1087 0.0 0
M  V30 11 C 0.0 -0.5 0.0 0
M  V30 12 N 0.866 0.0 0.0 0
M  V30 13 C -0.9659 -0.2411 0.0 0
M  V30 14 C -0.2588 -1.4659 0.0 0
M  V30 15 C 0.866 0.9999 0.0 0
M  V30 16 C -1.2247 -1.2071 0.0 0
M  V30 17 O 1.732 1.4999 0.0 0
M  V30 18 C 0.0 1.5 0.0 0 CFG=2
M  V30 19 C -0.866 1.0 0.0 0
M  V30 20 C 0.0 2.5 0.0 0
M  V30 21 C -1.732 1.4999 0.0 0
M  V30 22 C -0.866 2.9999 0.0 0
M  V30 23 O -2.598 1.0 0.0 0
M  V30 24 N -1.732 2.5 0.0 0
M  V30 END ATOM
M  V30 BEGIN BOND
M  V30 1 1 1 2
M  V30 2 1 2 3
M  V30 3 1 2 4
M  V30 4 1 2 5
M  V30 5 2 5 6
M  V30 6 1 5 7
M  V30 7 1 6 8
M  V30 8 2 7 9
M  V30 9 2 8 10
M  V30 10 1 10 11
M  V30 11 1 11 12
M  V30 12 1 11 13
M  V30 13 1 11 14
M  V30 14 1 12 15
M  V30 15 1 13 16
M  V30 16 2 15 17
M  V30 17 1 18 15 CFG=3
M  V30 18 1 18 19
M  V30 19 1 18 20
M  V30 20 1 19 21
M  V30 21 1 20 22
M  V30 22 2 21 23
M  V30 23 1 21 24
M  V30 24 1 9 10
M  V30 25 1 14 16
M  V30 26 1 22 24
M  V30 END BOND
M  V30 BEGIN COLLECTION
M  V30 MDLV30/STERAC1 ATOMS=(1 18)
M  V30 END COLLECTION
M  V30 END CTAB
M  END
>  <ID>
ZINC000622192481

>  <name>
NA

>  <smiles>
FC(F)(F)c1ccc(cc1)C1(CCC1)NC(=O)C1CCNC(=O)C1

$$$$
ZINC000667114788
Actelion Java MolfileCreator 2.0

  0  0  0  0  0  0              0 V3000
M  V30 BEGIN CTAB
M  V30 COUNTS 26 28 0 0 0
M  V30 BEGIN ATOM
M  V30 1 O 5.7424 0.737 0.0 0
M  V30 2 C 4.7452 0.6623 0.0 0
M  V30 3 N 4.2452 1.5283 0.0 0
M  V30 4 C 4.3798 -0.2685 0.0 0
M  V30 5 C 3.2563 1.6773 0.0 0
M  V30 6 C 4.8085 2.3545 0.0 0
M  V30 7 C 3.4243 -0.5633 0.0 0
M  V30 8 C 2.5233 0.9972 0.0 0
M  V30 9 N 2.598 0.0 0.0 0
M  V30 10 C 1.732 -0.5 0.0 0
M  V30 11 O 1.732 -1.5 0.0 0
M  V30 12 N 0.866 0.0 0.0 0
M  V30 13 C 0.0 -0.5 0.0 0
M  V30 14 N -0.9135 -0.0932 0.0 0
M  V30 15 C -0.1045 -1.4945 0.0 0
M  V30 16 N -1.5826 -0.8364 0.0 0
M  V30 17 C -1.1214 0.8848 0.0 0
M  V30 18 C -1.0826 -1.7024 0.0 0
M  V30 19 C -0.3783 1.554 0.0 0
M  V30 20 C -2.0725 1.1939 0.0 0
M  V30 21 C -1.4894 -2.6159 0.0 0
M  V30 22 C -0.5862 2.5321 0.0 0
M  V30 23 C -2.2804 2.172 0.0 0
M  V30 24 C -2.4839 -2.7205 0.0 0
M  V30 25 C -0.9016 -3.4249 0.0 0
M  V30 26 C -1.5372 2.8411 0.0 0
M  V30 END ATOM
M  V30 BEGIN BOND
M  V30 1 2 1 2
M  V30 2 1 2 3
M  V30 3 1 2 4
M  V30 4 1 3 5
M  V30 5 1 3 6
M  V30 6 1 4 7
M  V30 7 1 5 8
M  V30 8 1 7 9
M  V30 9 1 9 10
M  V30 10 2 10 11
M  V30 11 1 10 12
M  V30 12 2 12 13 CFG=2
M  V30 13 1 13 14
M  V30 14 1 13 15
M  V30 15 1 14 16
M  V30 16 1 14 17
M  V30 17 2 15 18
M  V30 18 2 17 19
M  V30 19 1 17 20
M  V30 20 1 18 21
M  V30 21 1 19 22
M  V30 22 2 20 23
M  V30 23 1 21 24
M  V30 24 1 21 25
M  V30 25 2 22 26
M  V30 26 1 8 9
M  V30 27 1 16 18
M  V30 28 1 23 26
M  V30 END BOND
M  V30 END CTAB
M  END
>  <ID>
ZINC000667114788

>  <name>
NA

>  <smiles>
CC(C)c1cc(=NC(=O)N2CCN(C)C(=O)CC2)n([nH]1)-c1ccccc1

$$$$
ZINC001653678819
Actelion Java MolfileCreator 2.0

  0  0  0  0  0  0              0 V3000
M  V30 BEGIN CTAB
M  V30 COUNTS 23 25 0 0 0
M  V30 BEGIN ATOM
M  V30 1 F 6.4951 0.0 0.0 0
M  V30 2 C 5.1961 -0.75 0.0 0
M  V30 3 F 5.1961 -2.25 0.0 0
M  V30 4 C 3.8971 0.0 0.0 0 CFG=2
M  V30 5 N 2.598 -0.75 0.0 0
M  V30 6 C 3.8971 1.5 0.0 0
M  V30 7 C 1.299 0.0 0.0 0
M  V30 8 C 5.1961 2.25 0.0 0
M  V30 9 C 2.598 2.2499 0.0 0
M  V30 10 C 0.0 -0.75 0.0 0
M  V30 11 C 5.1961 3.75 0.0 0
M  V30 12 C 2.598 3.75 0.0 0
M  V30 13 N -1.299 0.0 0.0 0
M  V30 14 C 0.0 -2.2499 0.0 0
M  V30 15 C 3.8971 4.5 0.0 0
M  V30 16 C -2.598 -0.7499 0.0 0
M  V30 17 C -1.299 -2.9999 0.0 0
M  V30 18 N -4.0246 -0.2864 0.0 0
M  V30 19 N -2.598 -2.2499 0.0 0
M  V30 20 O -1.299 -4.4999 0.0 0
M  V30 21 C -4.9063 -1.4999 0.0 0
M  V30 22 N -4.0246 -2.7135 0.0 0
M  V30 23 N -6.4063 -1.4999 0.0 0
M  V30 END ATOM
M  V30 BEGIN BOND
M  V30 1 1 1 2
M  V30 2 1 2 3
M  V30 3 1 4 2
M  V30 4 1 4 5 CFG=3
M  V30 5 1 4 6
M  V30 6 1 5 7
M  V30 7 2 6 8
M  V30 8 1 6 9
M  V30 9 1 7 10
M  V30 10 1 8 11
M  V30 11 2 9 12
M  V30 12 1 10 13
M  V30 13 2 10 14
M  V30 14 2 11 15
M  V30 15 1 13 16
M  V30 16 1 14 17
M  V30 17 2 16 18
M  V30 18 1 16 19
M  V30 19 2 17 20
M  V30 20 1 18 21
M  V30 21 1 19 22
M  V30 22 2 21 23
M  V30 23 1 12 15
M  V30 24 1 17 19
M  V30 25 1 21 22
M  V30 END BOND
M  V30 BEGIN COLLECTION
M  V30 MDLV30/STERAC1 ATOMS=(1 4)
M  V30 END COLLECTION
M  V30 END CTAB
M  END
>  <ID>
ZINC001653678819

>  <name>
NA

>  <smiles>
FC(F)C(NCc1cc(=O)n2[nH]c(=N)nc2[nH]1)c1ccccc1

$$$$
ZINC000680326435
Actelion Java MolfileCreator 2.0

  0  0  0  0  0  0              0 V3000
M  V30 BEGIN CTAB
M  V30 COUNTS 24 26 0 0 0
M  V30 BEGIN ATOM
M  V30 1 Cl -1.8866 2.4052 0.0 0
M  V30 2 C -0.9956 1.9512 0.0 0
M  V30 3 C -0.9433 0.9526 0.0 0
M  V30 4 C -0.157 2.4958 0.0 0
M  V30 5 C -0.0523 0.4986 0.0 0
M  V30 6 C 0.7339 2.0418 0.0 0
M  V30 7 C 0.7863 1.0432 0.0 0
M  V30 8 C 0.0 -0.5 0.0 0
M  V30 9 N 0.866 0.0 0.0 0
M  V30 10 C -0.1045 -1.4945 0.0 0
M  V30 11 C -0.9135 -0.0932 0.0 0
M  V30 12 C 1.732 -0.5 0.0 0
M  V30 13 C -1.0826 -1.7024 0.0 0
M  V30 14 C -1.5826 -0.8364 0.0 0
M  V30 15 O 2.598 0.0 0.0 0
M  V30 16 C 1.732 -1.5 0.0 0
M  V30 17 C 2.598 -1.9999 0.0 0
M  V30 18 C 0.866 -1.9999 0.0 0
M  V30 19 C 2.598 -2.9999 0.0 0
M  V30 20 C 0.866 -3.0 0.0 0
M  V30 21 O 3.4641 -3.4999 0.0 0
M  V30 22 N 1.732 -3.5 0.0 0
M  V30 23 C 0.0 -3.5 0.0 0
M  V30 24 C -0.866 -3.0 0.0 0
M  V30 END ATOM
M  V30 BEGIN BOND
M  V30 1 1 1 2
M  V30 2 2 2 3
M  V30 3 1 2 4
M  V30 4 1 3 5
M  V30 5 2 4 6
M  V30 6 2 5 7
M  V30 7 1 5 8
M  V30 8 1 8 9
M  V30 9 1 8 10
M  V30 10 1 8 11
M  V30 11 1 9 12
M  V30 12 1 10 13
M  V30 13 1 11 14
M  V30 14 2 12 15
M  V30 15 1 12 16
M  V30 16 1 16 17
M  V30 17 1 16 18
M  V30 18 1 17 19
M  V30 19 1 18 20
M  V30 20 2 19 21
M  V30 21 1 19 22
M  V30 22 1 20 23
M  V30 23 1 23 24
M  V30 24 1 6 7
M  V30 25 1 13 14
M  V30 26 1 20 22
M  V30 END BOND
M  V30 END CTAB
M  END
>  <ID>
ZINC000680326435

>  <name>
NA

>  <smiles>
CCC1CC(CC(=O)N1)C(=O)NC1(CCCC1)c1cccc(Cl)c1

$$$$
ZINC000843963597
Actelion Java MolfileCreator 2.0

  0  0  0  0  0  0              0 V3000
M  V30 BEGIN CTAB
M  V30 COUNTS 25 26 0 0 0
M  V30 BEGIN ATOM
M  V30 1 F 6.2942 3.75 0.0 0
M  V30 2 C 7.7942 3.75 0.0 0
M  V30 3 F 7.7942 5.25 0.0 0
M  V30 4 F 9.2942 3.75 0.0 0
M  V30 5 C 7.7942 2.25 0.0 0
M  V30 6 C 6.4952 1.5 0.0 0
M  V30 7 C 9.0932 1.5 0.0 0
M  V30 8 C 6.4952 0.0 0.0 0
M  V30 9 C 9.0932 0.0 0.0 0
M  V30 10 C 7.7942 -0.75 0.0 0
M  V30 11 C 5.1961 -0.75 0.0 0 CFG=1
M  V30 12 O 4.4461 -2.049 0.0 0
M  V30 13 C 3.8971 0.0 0.0 0
M  V30 14 C 5.9461 -2.049 0.0 0
M  V30 15 O 3.8971 1.5 0.0 0
M  V30 16 N 2.598 -0.75 0.0 0
M  V30 17 C 1.299 0.0 0.0 0
M  V30 18 C 0.0 -0.75 0.0 0
M  V30 19 C -1.299 0.0 0.0 0
M  V30 20 C 0.0 -2.25 0.0 0
M  V30 21 C -2.598 -0.75 0.0 0
M  V30 22 C -1.299 -3.0 0.0 0
M  V30 23 C -2.598 -2.25 0.0 0
M  V30 24 C -3.8971 -3.0 0.0 0
M  V30 25 O -3.8971 -4.5 0.0 0
M  V30 END ATOM
M  V30 BEGIN BOND
M  V30 1 1 1 2
M  V30 2 1 2 3
M  V30 3 1 2 4
M  V30 4 1 2 5
M  V30 5 2 5 6
M  V30 6 1 5 7
M  V30 7 1 6 8
M  V30 8 2 7 9
M  V30 9 2 8 10
M  V30 10 1 11 8
M  V30 11 1 11 12 CFG=1
M  V30 12 1 11 13
M  V30 13 1 11 14
M  V30 14 2 13 15
M  V30 15 1 13 16
M  V30 16 1 16 17
M  V30 17 1 17 18
M  V30 18 2 18 19
M  V30 19 1 18 20
M  V30 20 1 19 21
M  V30 21 2 20 22
M  V30 22 2 21 23
M  V30 23 1 23 24
M  V30 24 1 24 25
M  V30 25 1 9 10
M  V30 26 1 22 23
M  V30 END BOND
M  V30 BEGIN COLLECTION
M  V30 MDLV30/STERAC1 ATOMS=(1 11)
M  V30 END COLLECTION
M  V30 END CTAB
M  END
>  <ID>
ZINC000843963597

>  <name>
NA

>  <smiles>
CC(O)(C(=O)NCc1ccc(CO)cc1)c1cccc(c1)C(F)(F)F

$$$$
ZINC000679651602
Actelion Java MolfileCreator 2.0

  0  0  0  0  0  0              0 V3000
M  V30 BEGIN CTAB
M  V30 COUNTS 24 26 0 0 0
M  V30 BEGIN ATOM
M  V30 1 O 2.598 3.9999 0.0 0
M  V30 2 C 2.598 2.9999 0.0 0
M  V30 3 N 3.4641 2.4999 0.0 0
M  V30 4 C 1.732 2.4999 0.0 0
M  V30 5 C 3.4641 1.4999 0.0 0
M  V30 6 C 1.732 1.4999 0.0 0
M  V30 7 C 2.598 0.9999 0.0 0
M  V30 8 C 4.3301 0.9999 0.0 0
M  V30 9 C 0.866 0.9999 0.0 0
M  V30 10 O 0.0 1.5 0.0 0
M  V30 11 N 0.866 0.0 0.0 0
M  V30 12 C 0.0 -0.5 0.0 0
M  V30 13 C 0.8386 -1.0446 0.0 0
M  V30 14 C -0.9135 -0.0932 0.0 0
M  V30 15 C -0.1045 -1.4945 0.0 0
M  V30 16 C 0.7863 -2.0432 0.0 0
M  V30 17 C 1.7296 -0.5906 0.0 0
M  V30 18 C -1.5826 -0.8364 0.0 0
M  V30 19 C -1.0826 -1.7024 0.0 0
M  V30 20 C 1.625 -2.5879 0.0 0
M  V30 21 C 2.5683 -1.1352 0.0 0
M  V30 22 C 2.516 -2.1339 0.0 0
M  V30 23 O 3.3546 -2.6785 0.0 0
M  V30 24 C 4.2456 -2.2245 0.0 0
M  V30 END ATOM
M  V30 BEGIN BOND
M  V30 1 2 1 2
M  V30 2 1 2 3
M  V30 3 1 2 4
M  V30 4 1 3 5
M  V30 5 1 4 6
M  V30 6 1 5 7
M  V30 7 1 5 8
M  V30 8 1 6 9
M  V30 9 2 9 10
M  V30 10 1 9 11
M  V30 11 1 11 12
M  V30 12 1 12 13
M  V30 13 1 12 14
M  V30 14 1 12 15
M  V30 15 2 13 16
M  V30 16 1 13 17
M  V30 17 1 14 18
M  V30 18 1 15 19
M  V30 19 1 16 20
M  V30 20 2 17 21
M  V30 21 2 20 22
M  V30 22 1 22 23
M  V30 23 1 23 24
M  V30 24 1 6 7
M  V30 25 1 18 19
M  V30 26 1 21 22
M  V30 END BOND
M  V30 END CTAB
M  END
>  <ID>
ZINC000679651602

>  <name>
NA

>  <smiles>
COc1ccc(cc1)C1(CCCC1)NC(=O)C1CC(C)NC(=O)C1

$$$$
ZINC000271074737
Actelion Java MolfileCreator 2.0

  0  0  0  0  0  0              0 V3000
M  V30 BEGIN CTAB
M  V30 COUNTS 26 29 0 0 0
M  V30 BEGIN ATOM
M  V30 1 O 2.598 -1.9999 0.0 0
M  V30 2 C 3.4641 -1.4999 0.0 0
M  V30 3 N 4.3301 -1.9999 0.0 0
M  V30 4 C 3.4641 -0.5 0.0 0
M  V30 5 C 5.1961 -1.4999 0.0 0
M  V30 6 N 2.598 0.0 0.0 0
M  V30 7 C 4.3301 0.0 0.0 0
M  V30 8 O 6.0621 -1.9999 0.0 0
M  V30 9 C 5.1961 -0.4999 0.0 0
M  V30 10 C 1.732 -0.5 0.0 0 CFG=2
M  V30 11 O 1.732 -1.5 0.0 0
M  V30 12 N 0.866 0.0 0.0 0
M  V30 13 C 0.0 -0.5 0.0 0
M  V30 14 N -0.9135 -0.0932 0.0 0
M  V30 15 C -0.1045 -1.4945 0.0 0
M  V30 16 N -1.5826 -0.8364 0.0 0
M  V30 17 C -1.1214 0.8848 0.0 0
M  V30 18 C -1.0826 -1.7024 0.0 0
M  V30 19 C -0.3783 1.554 0.0 0
M  V30 20 C -2.0725 1.1939 0.0 0
M  V30 21 C -1.4894 -2.6159 0.0 0
M  V30 22 C -0.5862 2.5321 0.0 0
M  V30 23 C -2.2804 2.172 0.0 0
M  V30 24 C -2.2984 -3.2037 0.0 0
M  V30 25 C -1.3848 -3.6105 0.0 0
M  V30 26 C -1.5372 2.8411 0.0 0
M  V30 END ATOM
M  V30 BEGIN BOND
M  V30 1 2 1 2
M  V30 2 1 2 3
M  V30 3 1 2 4
M  V30 4 1 3 5
M  V30 5 1 4 6
M  V30 6 2 4 7
M  V30 7 1 5 8
M  V30 8 2 5 9
M  V30 9 1 10 6
M  V30 10 1 10 11 CFG=3
M  V30 11 1 10 12
M  V30 12 2 12 13 CFG=2
M  V30 13 1 13 14
M  V30 14 1 13 15
M  V30 15 1 14 16
M  V30 16 1 14 17
M  V30 17 2 15 18
M  V30 18 2 17 19
M  V30 19 1 17 20
M  V30 20 1 18 21
M  V30 21 1 19 22
M  V30 22 2 20 23
M  V30 23 1 21 24
M  V30 24 1 21 25
M  V30 25 2 22 26
M  V30 26 1 7 9
M  V30 27 1 16 18
M  V30 28 1 23 26
M  V30 29 1 24 25
M  V30 END BOND
M  V30 BEGIN COLLECTION
M  V30 MDLV30/STERAC1 ATOMS=(1 10)
M  V30 END COLLECTION
M  V30 END CTAB
M  END
>  <ID>
ZINC000271074737

>  <name>
NA

>  <smiles>
OC(Nc1ccc(O)[nH]c1=O)N=c1cc([nH]n1-c1ccccc1)C1CC1

$$$$
ZINC001141698786
Actelion Java MolfileCreator 2.0

  0  0  0  0  0  0              0 V3000
M  V30 BEGIN CTAB
M  V30 COUNTS 26 29 0 0 0
M  V30 BEGIN ATOM
M  V30 1 O 6.8689 0.5 0.0 0
M  V30 2 C 5.8689 0.5 0.0 0
M  V30 3 N 5.2811 1.309 0.0 0
M  V30 4 N 5.2811 -0.309 0.0 0
M  V30 5 C 4.3301 1.0 0.0 0
M  V30 6 C 5.5902 2.26 0.0 0
M  V30 7 C 4.3301 0.0 0.0 0
M  V30 8 C 5.5902 -1.26 0.0 0
M  V30 9 C 3.4641 1.4999 0.0 0
M  V30 10 C 3.4641 -0.5 0.0 0
M  V30 11 C 2.598 0.9999 0.0 0
M  V30 12 C 2.598 0.0 0.0 0
M  V30 13 O 1.732 1.4999 0.0 0
M  V30 14 N 1.732 -0.5 0.0 0
M  V30 15 C 0.866 0.0 0.0 0
M  V30 16 O 0.866 1.0 0.0 0
M  V30 17 C 0.0 -0.5 0.0 0
M  V30 18 N -0.9135 -0.0932 0.0 0
M  V30 19 C -0.1045 -1.4945 0.0 0
M  V30 20 C -1.5826 -0.8364 0.0 0
M  V30 21 N -1.0826 -1.7024 0.0 0
M  V30 22 C -2.5826 -0.8364 0.0 0
M  V30 23 C -1.5826 -2.5684 0.0 0
M  V30 24 C -3.0826 -1.7024 0.0 0
M  V30 25 C -2.5826 -2.5684 0.0 0
M  V30 26 C -3.0826 -3.4344 0.0 0
M  V30 END ATOM
M  V30 BEGIN BOND
M  V30 1 2 1 2
M  V30 2 1 2 3
M  V30 3 1 2 4
M  V30 4 1 3 5
M  V30 5 1 3 6
M  V30 6 1 4 7
M  V30 7 1 4 8
M  V30 8 1 5 9
M  V30 9 1 7 10
M  V30 10 2 9 11
M  V30 11 2 10 12
M  V30 12 1 11 13
M  V30 13 1 12 14
M  V30 14 1 14 15
M  V30 15 2 15 16
M  V30 16 1 15 17
M  V30 17 1 17 18
M  V30 18 2 17 19
M  V30 19 2 18 20
M  V30 20 1 19 21
M  V30 21 1 20 22
M  V30 22 1 21 23
M  V30 23 2 22 24
M  V30 24 2 23 25
M  V30 25 1 25 26
M  V30 26 2 5 7
M  V30 27 1 11 12
M  V30 28 1 20 21
M  V30 29 1 24 25
M  V30 END BOND
M  V30 END CTAB
M  END
>  <ID>
ZINC001141698786

>  <name>
NA

>  <smiles>
Cc1ccc2nc(cn2c1)C(=O)Nc1cc2n(C)c(=O)n(C)c2cc1O

$$$$
ZINC001472039661
Actelion Java MolfileCreator 2.0

  0  0  0  0  0  0              0 V3000
M  V30 BEGIN CTAB
M  V30 COUNTS 25 27 0 0 0
M  V30 BEGIN ATOM
M  V30 1 O 9.0932 -3.0 0.0 0
M  V30 2 C 7.7942 -2.2499 0.0 0
M  V30 3 N 7.7942 -0.75 0.0 0
M  V30 4 C 6.4951 -2.9999 0.0 0
M  V30 5 N 6.4951 0.0 0.0 0
M  V30 6 C 9.0932 0.0 0.0 0
M  V30 7 C 5.1961 -2.25 0.0 0
M  V30 8 C 5.1961 -0.75 0.0 0
M  V30 9 C 10.3923 -0.75 0.0 0
M  V30 10 C 9.0932 1.4999 0.0 0
M  V30 11 C 3.8971 0.0 0.0 0 CFG=2
M  V30 12 C 11.6913 0.0 0.0 0
M  V30 13 C 10.3923 2.2499 0.0 0
M  V30 14 O 3.8971 1.5 0.0 0
M  V30 15 N 2.598 -0.75 0.0 0
M  V30 16 C 11.6913 1.4999 0.0 0
M  V30 17 C 1.299 0.0 0.0 0
M  V30 18 C 2.598 -2.25 0.0 0
M  V30 19 C 0.0 -0.75 0.0 0
M  V30 20 N -1.299 0.0 0.0 0
M  V30 21 C 0.0 -2.2499 0.0 0
M  V30 22 C -2.598 -0.7499 0.0 0
M  V30 23 C -1.299 -2.9999 0.0 0
M  V30 24 O -3.8971 0.0 0.0 0
M  V30 25 C -2.598 -2.2499 0.0 0
M  V30 END ATOM
M  V30 BEGIN BOND
M  V30 1 2 1 2
M  V30 2 1 2 3
M  V30 3 1 2 4
M  V30 4 1 3 5
M  V30 5 1 3 6
M  V30 6 2 4 7
M  V30 7 2 5 8
M  V30 8 2 6 9
M  V30 9 1 6 10
M  V30 10 1 11 8
M  V30 11 1 9 12
M  V30 12 2 10 13
M  V30 13 1 11 14 CFG=1
M  V30 14 1 11 15
M  V30 15 2 12 16
M  V30 16 1 15 17
M  V30 17 1 15 18
M  V30 18 1 17 19
M  V30 19 1 19 20
M  V30 20 2 19 21
M  V30 21 1 20 22
M  V30 22 1 21 23
M  V30 23 2 22 24
M  V30 24 1 22 25
M  V30 25 1 7 8
M  V30 26 1 13 16
M  V30 27 2 23 25
M  V30 END BOND
M  V30 BEGIN COLLECTION
M  V30 MDLV30/STERAC1 ATOMS=(1 11)
M  V30 END COLLECTION
M  V30 END CTAB
M  END
>  <ID>
ZINC001472039661

>  <name>
NA

>  <smiles>
CN(Cc1cccc(=O)[nH]1)C(O)c1ccc(=O)n(n1)-c1ccccc1

$$$$
ZINC001158319655
Actelion Java MolfileCreator 2.0

  0  0  0  0  0  0              0 V3000
M  V30 BEGIN CTAB
M  V30 COUNTS 26 29 0 0 0
M  V30 BEGIN ATOM
M  V30 1 F 4.3301 0.9999 0.0 0
M  V30 2 C 4.3301 0.0 0.0 0
M  V30 3 C 3.4641 -0.5 0.0 0
M  V30 4 C 5.1961 -0.5 0.0 0
M  V30 5 C 3.4641 -1.5 0.0 0
M  V30 6 C 2.598 0.0 0.0 0
M  V30 7 C 5.1961 -1.5 0.0 0
M  V30 8 C 4.3301 -2.0 0.0 0
M  V30 9 C 1.732 -0.5 0.0 0
M  V30 10 N 1.732 -1.5 0.0 0
M  V30 11 C 0.866 0.0 0.0 0
M  V30 12 O 0.866 1.0 0.0 0
M  V30 13 N 0.0 -0.5 0.0 0
M  V30 14 C 0.0 -1.4999 0.0 0
M  V30 15 C -0.866 0.0 0.0 0
M  V30 16 C -0.866 -1.9999 0.0 0
M  V30 17 C -1.732 -0.4999 0.0 0
M  V30 18 N -1.732 -1.4999 0.0 0
M  V30 19 C -1.0739 -2.9781 0.0 0
M  V30 20 C -2.4751 -2.1691 0.0 0
M  V30 21 C -2.0684 -3.0826 0.0 0
M  V30 22 C -0.4861 -3.7871 0.0 0
M  V30 23 O -3.4533 -1.9612 0.0 0
M  V30 24 C -2.4751 -3.9962 0.0 0
M  V30 25 C -0.8928 -4.7007 0.0 0
M  V30 26 C -1.8874 -4.8052 0.0 0
M  V30 END ATOM
M  V30 BEGIN BOND
M  V30 1 1 1 2
M  V30 2 2 2 3
M  V30 3 1 2 4
M  V30 4 1 3 5
M  V30 5 1 3 6
M  V30 6 2 4 7
M  V30 7 2 5 8
M  V30 8 1 6 9
M  V30 9 1 9 10
M  V30 10 1 9 11
M  V30 11 2 11 12
M  V30 12 1 11 13
M  V30 13 1 13 14
M  V30 14 1 13 15
M  V30 15 1 14 16
M  V30 16 1 15 17
M  V30 17 1 16 18
M  V30 18 1 16 19
M  V30 19 1 18 20
M  V30 20 2 19 21
M  V30 21 1 19 22
M  V30 22 2 20 23
M  V30 23 1 21 24
M  V30 24 2 22 25
M  V30 25 2 24 26
M  V30 26 1 7 8
M  V30 27 1 17 18
M  V30 28 1 20 21
M  V30 29 1 25 26
M  V30 END BOND
M  V30 END CTAB
M  END
>  <ID>
ZINC001158319655

>  <name>
NA

>  <smiles>
NC(Cc1ccccc1F)C(=O)N1CCN2C(C1)c1ccccc1C2=O

$$$$
ZINC001438390061
Actelion Java MolfileCreator 2.0

  0  0  0  0  0  0              0 V3000
M  V30 BEGIN CTAB
M  V30 COUNTS 25 28 0 0 0
M  V30 BEGIN ATOM
M  V30 1 O 6.3685 -3.3368 0.0 0
M  V30 2 C 5.032 -4.0178 0.0 0
M  V30 3 N 4.9535 -5.5157 0.0 0
M  V30 4 C 3.774 -3.2008 0.0 0
M  V30 5 C 3.617 -6.1967 0.0 0
M  V30 6 C 2.4375 -3.8818 0.0 0
M  V30 7 C 2.359 -5.3798 0.0 0
M  V30 8 C 3.5385 -7.6947 0.0 0
M  V30 9 C 1.1795 -3.0649 0.0 0 CFG=2
M  V30 10 C 1.0224 -6.0607 0.0 0
M  V30 11 C 2.2019 -8.3756 0.0 0
M  V30 12 O -0.157 -3.7458 0.0 0
M  V30 13 N 1.258 -1.5669 0.0 0
M  V30 14 C 0.9439 -7.5587 0.0 0
M  V30 15 C 0.0 -0.75 0.0 0
M  V30 16 C -1.3703 -0.1398 0.0 0
M  V30 17 C -0.1567 -2.2417 0.0 0
M  V30 18 C 1.299 0.0 0.0 0
M  V30 19 C -2.374 -1.2546 0.0 0
M  V30 20 C -1.624 -2.5536 0.0 0
M  V30 21 N 2.598 -0.75 0.0 0
M  V30 22 C 3.8971 0.0 0.0 0
M  V30 23 C 5.1961 -0.75 0.0 0
M  V30 24 C 5.9461 -2.049 0.0 0
M  V30 25 C 6.6961 -0.7499 0.0 0
M  V30 END ATOM
M  V30 BEGIN BOND
M  V30 1 2 1 2
M  V30 2 1 2 3
M  V30 3 1 2 4
M  V30 4 1 3 5
M  V30 5 2 4 6
M  V30 6 2 5 7
M  V30 7 1 5 8
M  V30 8 1 9 6
M  V30 9 1 7 10
M  V30 10 2 8 11
M  V30 11 1 9 12 CFG=3
M  V30 12 1 9 13
M  V30 13 2 10 14
M  V30 14 1 13 15
M  V30 15 1 15 16
M  V30 16 1 15 17
M  V30 17 1 15 18
M  V30 18 1 16 19
M  V30 19 1 17 20
M  V30 20 1 18 21
M  V30 21 1 21 22
M  V30 22 1 22 23
M  V30 23 1 23 24
M  V30 24 1 23 25
M  V30 25 1 6 7
M  V30 26 1 11 14
M  V30 27 1 19 20
M  V30 28 1 24 25
M  V30 END BOND
M  V30 BEGIN COLLECTION
M  V30 MDLV30/STERAC1 ATOMS=(1 9)
M  V30 END COLLECTION
M  V30 END CTAB
M  END
>  <ID>
ZINC001438390061

>  <name>
NA

>  <smiles>
OC(NC1(CNCC2CC2)CCCC1)c1cc(=O)[nH]c2ccccc12

$$$$
ZINC001434060164
Actelion Java MolfileCreator 2.0

  0  0  0  0  0  0              0 V3000
M  V30 BEGIN CTAB
M  V30 COUNTS 23 25 0 0 0
M  V30 BEGIN ATOM
M  V30 1 O 5.1961 2.4999 0.0 0
M  V30 2 C 5.1961 1.4999 0.0 0
M  V30 3 C 4.3301 1.0 0.0 0
M  V30 4 C 6.0621 0.9999 0.0 0
M  V30 5 C 4.3301 0.0 0.0 0
M  V30 6 C 6.0621 0.0 0.0 0
M  V30 7 N 5.1961 -0.5 0.0 0
M  V30 8 C 3.4641 -0.5 0.0 0
M  V30 9 N 2.598 0.0 0.0 0
M  V30 10 C 1.732 -0.5 0.0 0
M  V30 11 O 1.732 -1.5 0.0 0
M  V30 12 C 0.866 0.0 0.0 0
M  V30 13 C 0.0 -0.5 0.0 0 CFG=2
M  V30 14 C -0.866 0.0 0.0 0
M  V30 15 C 0.0 -1.4999 0.0 0
M  V30 16 C -1.732 -0.4999 0.0 0
M  V30 17 C -0.866 1.0 0.0 0
M  V30 18 C -0.866 -1.9999 0.0 0
M  V30 19 N -1.732 -1.4999 0.0 0
M  V30 20 C -2.598 0.0 0.0 0
M  V30 21 C -1.732 1.5 0.0 0
M  V30 22 O -0.866 -2.9999 0.0 0
M  V30 23 C -2.598 1.0 0.0 0
M  V30 END ATOM
M  V30 BEGIN BOND
M  V30 1 2 1 2
M  V30 2 1 2 3
M  V30 3 1 2 4
M  V30 4 2 3 5
M  V30 5 2 4 6
M  V30 6 1 5 7
M  V30 7 1 5 8
M  V30 8 1 8 9
M  V30 9 1 9 10
M  V30 10 2 10 11
M  V30 11 1 10 12
M  V30 12 1 13 12 CFG=1
M  V30 13 1 13 14
M  V30 14 1 13 15
M  V30 15 2 14 16
M  V30 16 1 14 17
M  V30 17 1 15 18
M  V30 18 1 16 19
M  V30 19 1 16 20
M  V30 20 2 17 21
M  V30 21 2 18 22
M  V30 22 2 20 23
M  V30 23 1 6 7
M  V30 24 1 18 19
M  V30 25 1 21 23
M  V30 END BOND
M  V30 BEGIN COLLECTION
M  V30 MDLV30/STERAC1 ATOMS=(1 13)
M  V30 END COLLECTION
M  V30 END CTAB
M  END
>  <ID>
ZINC001434060164

>  <name>
NA

>  <smiles>
O=C(CC1CC(=O)Nc2ccccc12)NCc1cc(=O)cc[nH]1

$$$$
ZINC000123288274
Actelion Java MolfileCreator 2.0

  0  0  0  0  0  0              0 V3000
M  V30 BEGIN CTAB
M  V30 COUNTS 21 23 0 0 0
M  V30 BEGIN ATOM
M  V30 1 O 2.598 3.9999 0.0 0
M  V30 2 C 2.598 2.9999 0.0 0
M  V30 3 N 3.4641 2.4999 0.0 0
M  V30 4 C 1.732 2.4999 0.0 0
M  V30 5 C 3.4641 1.4999 0.0 0
M  V30 6 C 1.732 1.4999 0.0 0 CFG=2
M  V30 7 C 2.598 0.9999 0.0 0
M  V30 8 C 0.866 0.9999 0.0 0
M  V30 9 O 0.0 1.5 0.0 0
M  V30 10 N 0.866 0.0 0.0 0
M  V30 11 C 0.0 -0.5 0.0 0
M  V30 12 C 0.8386 -1.0446 0.0 0
M  V30 13 C -0.9135 -0.0932 0.0 0
M  V30 14 C -0.1045 -1.4945 0.0 0
M  V30 15 C 0.7863 -2.0432 0.0 0
M  V30 16 C 1.7296 -0.5906 0.0 0
M  V30 17 C -1.5826 -0.8364 0.0 0
M  V30 18 C -1.0826 -1.7024 0.0 0
M  V30 19 C 1.625 -2.5879 0.0 0
M  V30 20 C 2.5683 -1.1352 0.0 0
M  V30 21 C 2.516 -2.1339 0.0 0
M  V30 END ATOM
M  V30 BEGIN BOND
M  V30 1 2 1 2
M  V30 2 1 2 3
M  V30 3 1 2 4
M  V30 4 1 3 5
M  V30 5 1 6 4
M  V30 6 1 5 7
M  V30 7 1 6 8 CFG=3
M  V30 8 2 8 9
M  V30 9 1 8 10
M  V30 10 1 10 11
M  V30 11 1 11 12
M  V30 12 1 11 13
M  V30 13 1 11 14
M  V30 14 2 12 15
M  V30 15 1 12 16
M  V30 16 1 13 17
M  V30 17 1 14 18
M  V30 18 1 15 19
M  V30 19 2 16 20
M  V30 20 2 19 21
M  V30 21 1 6 7
M  V30 22 1 17 18
M  V30 23 1 20 21
M  V30 END BOND
M  V30 BEGIN COLLECTION
M  V30 MDLV30/STERAC1 ATOMS=(1 6)
M  V30 END COLLECTION
M  V30 END CTAB
M  END
>  <ID>
ZINC000123288274

>  <name>
NA

>  <smiles>
O=C(NC1(CCCC1)c1ccccc1)C1CCNC(=O)C1

$$$$
ZINC000611863671
Actelion Java MolfileCreator 2.0

  0  0  0  0  0  0              0 V3000
M  V30 BEGIN CTAB
M  V30 COUNTS 24 26 0 0 0
M  V30 BEGIN ATOM
M  V30 1 F 6.0621 -4.9999 0.0 0
M  V30 2 C 5.1961 -4.5 0.0 0
M  V30 3 C 5.1961 -3.4999 0.0 0
M  V30 4 C 4.3301 -5.0 0.0 0
M  V30 5 C 4.3301 -2.9999 0.0 0
M  V30 6 C 3.4641 -4.5 0.0 0
M  V30 7 N 4.3301 -2.0 0.0 0
M  V30 8 C 3.4641 -3.5 0.0 0
M  V30 9 C 5.1961 -1.5 0.0 0
M  V30 10 C 3.4641 -1.5 0.0 0
M  V30 11 O 6.0621 -2.0 0.0 0
M  V30 12 C 5.1961 -0.5 0.0 0
M  V30 13 C 3.4641 -0.5 0.0 0 CFG=2
M  V30 14 C 4.3301 0.0 0.0 0
M  V30 15 C 2.598 0.0 0.0 0
M  V30 16 O 2.598 1.0 0.0 0
M  V30 17 N 1.732 -0.5 0.0 0
M  V30 18 C 0.866 0.0 0.0 0
M  V30 19 C 1.732 -1.5 0.0 0
M  V30 20 C 0.0 -0.5 0.0 0
M  V30 21 N -0.9135 -0.0932 0.0 0
M  V30 22 C -0.1045 -1.4945 0.0 0
M  V30 23 C -1.5826 -0.8364 0.0 0
M  V30 24 C -1.0826 -1.7024 0.0 0
M  V30 END ATOM
M  V30 BEGIN BOND
M  V30 1 1 1 2
M  V30 2 2 2 3
M  V30 3 1 2 4
M  V30 4 1 3 5
M  V30 5 2 4 6
M  V30 6 1 5 7
M  V30 7 2 5 8
M  V30 8 1 7 9
M  V30 9 1 7 10
M  V30 10 2 9 11
M  V30 11 1 9 12
M  V30 12 1 13 10
M  V30 13 1 12 14
M  V30 14 1 13 15 CFG=1
M  V30 15 2 15 16
M  V30 16 1 15 17
M  V30 17 1 17 18
M  V30 18 1 17 19
M  V30 19 1 18 20
M  V30 20 1 20 21
M  V30 21 2 20 22
M  V30 22 1 21 23
M  V30 23 1 22 24
M  V30 24 1 6 8
M  V30 25 1 13 14
M  V30 26 2 23 24
M  V30 END BOND
M  V30 BEGIN COLLECTION
M  V30 MDLV30/STERAC1 ATOMS=(1 13)
M  V30 END COLLECTION
M  V30 END CTAB
M  END
>  <ID>
ZINC000611863671

>  <name>
NA

>  <smiles>
CN(Cc1ccc[nH]1)C(=O)C1CCC(=O)N(C1)c1cccc(F)c1

$$$$
ZINC000563892727
Actelion Java MolfileCreator 2.0

  0  0  0  0  0  0              0 V3000
M  V30 BEGIN CTAB
M  V30 COUNTS 26 29 0 0 0
M  V30 BEGIN ATOM
M  V30 1 Br -0.2093 3.4945 0.0 0
M  V30 2 C -0.157 2.4958 0.0 0
M  V30 3 C 0.7339 2.0418 0.0 0
M  V30 4 C -0.9956 1.9512 0.0 0
M  V30 5 C 0.7863 1.0432 0.0 0
M  V30 6 C -0.9433 0.9526 0.0 0
M  V30 7 C -0.0523 0.4986 0.0 0
M  V30 8 C 0.0 -0.5 0.0 0
M  V30 9 N 0.866 0.0 0.0 0
M  V30 10 C -0.1045 -1.4945 0.0 0
M  V30 11 C -0.9135 -0.0932 0.0 0
M  V30 12 C 1.732 -0.5 0.0 0
M  V30 13 C -1.0826 -1.7024 0.0 0
M  V30 14 C -1.5826 -0.8364 0.0 0
M  V30 15 O 1.732 -1.5 0.0 0
M  V30 16 N 2.598 0.0 0.0 0
M  V30 17 C 3.4641 -0.5 0.0 0 CFG=2
M  V30 18 C 4.3301 0.0 0.0 0
M  V30 19 C 3.4641 -1.4999 0.0 0
M  V30 20 N 5.1961 -0.4999 0.0 0
M  V30 21 C 3.623 0.7071 0.0 0
M  V30 22 C 5.0372 0.7071 0.0 0
M  V30 23 C 4.3301 -1.9999 0.0 0
M  V30 24 C 5.1961 -1.4999 0.0 0
M  V30 25 C 4.3301 1.4142 0.0 0
M  V30 26 O 6.0621 -1.9999 0.0 0
M  V30 END ATOM
M  V30 BEGIN BOND
M  V30 1 1 1 2
M  V30 2 2 2 3
M  V30 3 1 2 4
M  V30 4 1 3 5
M  V30 5 2 4 6
M  V30 6 2 5 7
M  V30 7 1 7 8
M  V30 8 1 8 9
M  V30 9 1 8 10
M  V30 10 1 8 11
M  V30 11 1 9 12
M  V30 12 1 10 13
M  V30 13 1 11 14
M  V30 14 2 12 15
M  V30 15 1 12 16
M  V30 16 1 17 16 CFG=3
M  V30 17 1 17 18
M  V30 18 1 17 19
M  V30 19 1 18 20
M  V30 20 1 18 21
M  V30 21 1 18 22
M  V30 22 1 19 23
M  V30 23 1 20 24
M  V30 24 1 21 25
M  V30 25 2 24 26
M  V30 26 1 6 7
M  V30 27 1 13 14
M  V30 28 1 22 25
M  V30 29 1 23 24
M  V30 END BOND
M  V30 BEGIN COLLECTION
M  V30 MDLV30/STERAC1 ATOMS=(1 17)
M  V30 END COLLECTION
M  V30 END CTAB
M  END
>  <ID>
ZINC000563892727

>  <name>
NA

>  <smiles>
Brc1ccc(cc1)C1(CCCC1)NC(=O)NC1CCC(=O)NC11CCC1

$$$$
ZINC000856751528
Actelion Java MolfileCreator 2.0

  0  0  0  0  0  0              0 V3000
M  V30 BEGIN CTAB
M  V30 COUNTS 26 29 0 0 0
M  V30 BEGIN ATOM
M  V30 1 Cl 10.3923 2.2499 0.0 0
M  V30 2 C 9.0932 1.4999 0.0 0
M  V30 3 C 7.7942 2.25 0.0 0
M  V30 4 C 9.0932 0.0 0.0 0
M  V30 5 C 6.4951 1.5 0.0 0
M  V30 6 C 7.7942 -0.7499 0.0 0
M  V30 7 C 6.4951 0.0 0.0 0
M  V30 8 C 5.1961 -0.75 0.0 0 CFG=1
M  V30 9 O 5.1961 0.75 0.0 0
M  V30 10 C 3.8971 0.0 0.0 0
M  V30 11 C 5.1961 -2.2499 0.0 0
M  V30 12 N 2.598 -0.75 0.0 0
M  V30 13 C 3.8971 -3.0 0.0 0
M  V30 14 C 2.598 -2.25 0.0 0
M  V30 15 C 1.299 0.0 0.0 0
M  V30 16 C 0.0 -0.75 0.0 0
M  V30 17 N -1.299 0.0 0.0 0
M  V30 18 C 0.0 -2.2499 0.0 0
M  V30 19 C -2.598 -0.7499 0.0 0
M  V30 20 C -1.299 -2.9999 0.0 0
M  V30 21 N -4.0246 -0.2864 0.0 0
M  V30 22 N -2.598 -2.2499 0.0 0
M  V30 23 O -1.299 -4.4999 0.0 0
M  V30 24 C -4.9063 -1.4999 0.0 0
M  V30 25 N -4.0246 -2.7135 0.0 0
M  V30 26 N -6.4063 -1.4999 0.0 0
M  V30 END ATOM
M  V30 BEGIN BOND
M  V30 1 1 1 2
M  V30 2 2 2 3
M  V30 3 1 2 4
M  V30 4 1 3 5
M  V30 5 2 4 6
M  V30 6 2 5 7
M  V30 7 1 8 7
M  V30 8 1 8 9 CFG=1
M  V30 9 1 8 10
M  V30 10 1 8 11
M  V30 11 1 10 12
M  V30 12 1 11 13
M  V30 13 1 12 14
M  V30 14 1 12 15
M  V30 15 1 15 16
M  V30 16 1 16 17
M  V30 17 2 16 18
M  V30 18 1 17 19
M  V30 19 1 18 20
M  V30 20 2 19 21
M  V30 21 1 19 22
M  V30 22 2 20 23
M  V30 23 1 21 24
M  V30 24 1 22 25
M  V30 25 2 24 26
M  V30 26 1 6 7
M  V30 27 1 13 14
M  V30 28 1 20 22
M  V30 29 1 24 25
M  V30 END BOND
M  V30 BEGIN COLLECTION
M  V30 MDLV30/STERAC1 ATOMS=(1 8)
M  V30 END COLLECTION
M  V30 END CTAB
M  END
>  <ID>
ZINC000856751528

>  <name>
NA

>  <smiles>
OC1(CCCN(Cc2cc(=O)n3[nH]c(=N)nc3[nH]2)C1)c1ccc(Cl)cc1

$$$$
ZINC001181689720
Actelion Java MolfileCreator 2.0

  0  0  0  0  0  0              0 V3000
M  V30 BEGIN CTAB
M  V30 COUNTS 26 29 0 0 0
M  V30 BEGIN ATOM
M  V30 1 F 3.4641 2.5 0.0 0
M  V30 2 C 3.4641 1.5 0.0 0
M  V30 3 C 2.598 1.0 0.0 0
M  V30 4 C 4.3301 1.0 0.0 0
M  V30 5 C 2.598 0.0 0.0 0
M  V30 6 C 4.3301 0.0 0.0 0
M  V30 7 C 3.4641 -0.4999 0.0 0
M  V30 8 C 1.732 -0.5 0.0 0
M  V30 9 O 3.4641 -1.5 0.0 0
M  V30 10 C 0.866 0.0 0.0 0
M  V30 11 C 4.3301 -2.0 0.0 0
M  V30 12 O 0.866 1.0 0.0 0
M  V30 13 N 0.0 -0.5 0.0 0
M  V30 14 C 0.0 -1.4999 0.0 0
M  V30 15 C -0.866 0.0 0.0 0
M  V30 16 C -0.866 -1.9999 0.0 0 CFG=2
M  V30 17 C -1.732 -0.4999 0.0 0
M  V30 18 N -1.732 -1.4999 0.0 0
M  V30 19 C -1.0739 -2.9781 0.0 0
M  V30 20 C -2.4751 -2.1691 0.0 0
M  V30 21 C -2.0684 -3.0826 0.0 0
M  V30 22 C -0.4861 -3.7871 0.0 0
M  V30 23 O -3.4533 -1.9612 0.0 0
M  V30 24 C -2.4751 -3.9962 0.0 0
M  V30 25 C -0.8928 -4.7007 0.0 0
M  V30 26 C -1.8874 -4.8052 0.0 0
M  V30 END ATOM
M  V30 BEGIN BOND
M  V30 1 1 1 2
M  V30 2 2 2 3
M  V30 3 1 2 4
M  V30 4 1 3 5
M  V30 5 2 4 6
M  V30 6 2 5 7
M  V30 7 1 5 8
M  V30 8 1 7 9
M  V30 9 1 8 10
M  V30 10 1 9 11
M  V30 11 2 10 12
M  V30 12 1 10 13
M  V30 13 1 13 14
M  V30 14 1 13 15
M  V30 15 1 16 14
M  V30 16 1 15 17
M  V30 17 1 16 18 CFG=1
M  V30 18 1 16 19
M  V30 19 1 18 20
M  V30 20 2 19 21
M  V30 21 1 19 22
M  V30 22 2 20 23
M  V30 23 1 21 24
M  V30 24 2 22 25
M  V30 25 2 24 26
M  V30 26 1 6 7
M  V30 27 1 17 18
M  V30 28 1 20 21
M  V30 29 1 25 26
M  V30 END BOND
M  V30 BEGIN COLLECTION
M  V30 MDLV30/STERAC1 ATOMS=(1 16)
M  V30 END COLLECTION
M  V30 END CTAB
M  END
>  <ID>
ZINC001181689720

>  <name>
NA

>  <smiles>
COc1ccc(F)cc1CC(=O)N1CCN2C(C1)c1ccccc1C2=O

$$$$
ZINC000679651603
Actelion Java MolfileCreator 2.0

  0  0  0  0  0  0              0 V3000
M  V30 BEGIN CTAB
M  V30 COUNTS 24 26 0 0 0
M  V30 BEGIN ATOM
M  V30 1 O 2.598 3.9999 0.0 0
M  V30 2 C 2.598 2.9999 0.0 0
M  V30 3 N 3.4641 2.4999 0.0 0
M  V30 4 C 1.732 2.4999 0.0 0
M  V30 5 C 3.4641 1.4999 0.0 0
M  V30 6 C 1.732 1.4999 0.0 0
M  V30 7 C 2.598 0.9999 0.0 0
M  V30 8 C 4.3301 0.9999 0.0 0
M  V30 9 C 0.866 0.9999 0.0 0
M  V30 10 O 0.0 1.5 0.0 0
M  V30 11 N 0.866 0.0 0.0 0
M  V30 12 C 0.0 -0.5 0.0 0
M  V30 13 C 0.8386 -1.0446 0.0 0
M  V30 14 C -0.9135 -0.0932 0.0 0
M  V30 15 C -0.1045 -1.4945 0.0 0
M  V30 16 C 0.7863 -2.0432 0.0 0
M  V30 17 C 1.7296 -0.5906 0.0 0
M  V30 18 C -1.5826 -0.8364 0.0 0
M  V30 19 C -1.0826 -1.7024 0.0 0
M  V30 20 C 1.625 -2.5879 0.0 0
M  V30 21 C 2.5683 -1.1352 0.0 0
M  V30 22 C 2.516 -2.1339 0.0 0
M  V30 23 O 3.3546 -2.6785 0.0 0
M  V30 24 C 4.2456 -2.2245 0.0 0
M  V30 END ATOM
M  V30 BEGIN BOND
M  V30 1 2 1 2
M  V30 2 1 2 3
M  V30 3 1 2 4
M  V30 4 1 3 5
M  V30 5 1 4 6
M  V30 6 1 5 7
M  V30 7 1 5 8
M  V30 8 1 6 9
M  V30 9 2 9 10
M  V30 10 1 9 11
M  V30 11 1 11 12
M  V30 12 1 12 13
M  V30 13 1 12 14
M  V30 14 1 12 15
M  V30 15 2 13 16
M  V30 16 1 13 17
M  V30 17 1 14 18
M  V30 18 1 15 19
M  V30 19 1 16 20
M  V30 20 2 17 21
M  V30 21 2 20 22
M  V30 22 1 22 23
M  V30 23 1 23 24
M  V30 24 1 6 7
M  V30 25 1 18 19
M  V30 26 1 21 22
M  V30 END BOND
M  V30 END CTAB
M  END
>  <ID>
ZINC000679651603

>  <name>
NA

>  <smiles>
COc1ccc(cc1)C1(CCCC1)NC(=O)C1CC(C)NC(=O)C1

$$$$
ZINC000817622064
Actelion Java MolfileCreator 2.0

  0  0  0  0  0  0              0 V3000
M  V30 BEGIN CTAB
M  V30 COUNTS 25 26 0 0 0
M  V30 BEGIN ATOM
M  V30 1 F 4.1961 2.5 0.0 0
M  V30 2 C 5.1961 2.4999 0.0 0
M  V30 3 F 5.1961 3.4999 0.0 0
M  V30 4 F 6.1961 2.4999 0.0 0
M  V30 5 C 5.1961 1.4999 0.0 0
M  V30 6 C 4.3301 1.0 0.0 0
M  V30 7 C 6.0621 0.9999 0.0 0
M  V30 8 C 4.3301 0.0 0.0 0
M  V30 9 C 6.0621 0.0 0.0 0
M  V30 10 C 5.1961 -0.5 0.0 0
M  V30 11 C 3.4641 -0.5 0.0 0
M  V30 12 O 3.4641 -1.5 0.0 0
M  V30 13 C 2.598 0.0 0.0 0
M  V30 14 O 2.598 1.0 0.0 0
M  V30 15 N 1.732 -0.5 0.0 0
M  V30 16 C 0.866 0.0 0.0 0
M  V30 17 C 0.0 -0.5 0.0 0
M  V30 18 C -0.9135 -0.0932 0.0 0
M  V30 19 C -0.1045 -1.4945 0.0 0
M  V30 20 N -1.5826 -0.8364 0.0 0
M  V30 21 C -1.0826 -1.7024 0.0 0
M  V30 22 C -2.5771 -0.7318 0.0 0
M  V30 23 O -1.4894 -2.6159 0.0 0
M  V30 24 C -2.9839 0.1816 0.0 0
M  V30 25 C -3.9784 0.2861 0.0 0
M  V30 END ATOM
M  V30 BEGIN BOND
M  V30 1 1 1 2
M  V30 2 1 2 3
M  V30 3 1 2 4
M  V30 4 1 2 5
M  V30 5 2 5 6
M  V30 6 1 5 7
M  V30 7 1 6 8
M  V30 8 2 7 9
M  V30 9 2 8 10
M  V30 10 1 8 11
M  V30 11 1 11 12
M  V30 12 1 11 13
M  V30 13 2 13 14
M  V30 14 1 13 15
M  V30 15 1 15 16
M  V30 16 1 16 17
M  V30 17 1 17 18
M  V30 18 1 17 19
M  V30 19 1 18 20
M  V30 20 1 19 21
M  V30 21 1 20 22
M  V30 22 2 21 23
M  V30 23 1 22 24
M  V30 24 1 24 25
M  V30 25 1 9 10
M  V30 26 1 20 21
M  V30 END BOND
M  V30 END CTAB
M  END
>  <ID>
ZINC000817622064

>  <name>
NA

>  <smiles>
CCCN1CC(CNC(=O)C(O)c2cccc(c2)C(F)(F)F)CC1=O

$$$$
ZINC000680450863
Actelion Java MolfileCreator 2.0

  0  0  0  0  0  0              0 V3000
M  V30 BEGIN CTAB
M  V30 COUNTS 23 25 0 0 0
M  V30 BEGIN ATOM
M  V30 1 F 2.7716 0.398 0.0 0
M  V30 2 C 2.5758 -1.0891 0.0 0
M  V30 3 C 1.19 -1.6631 0.0 0
M  V30 4 C 3.7658 -2.0022 0.0 0
M  V30 5 C 0.9942 -3.1503 0.0 0
M  V30 6 C 0.0 -0.75 0.0 0
M  V30 7 C 3.57 -3.4894 0.0 0
M  V30 8 C 2.1842 -4.0634 0.0 0
M  V30 9 N 1.299 0.0 0.0 0
M  V30 10 C -1.4488 -0.3617 0.0 0
M  V30 11 C -0.3882 -2.1988 0.0 0
M  V30 12 F 4.7601 -4.4025 0.0 0
M  V30 13 C 1.299 1.4999 0.0 0
M  V30 14 C -1.8371 -1.8106 0.0 0
M  V30 15 O 2.598 2.2499 0.0 0
M  V30 16 C 0.0 2.25 0.0 0
M  V30 17 C -1.299 1.5 0.0 0
M  V30 18 C 0.0 3.75 0.0 0
M  V30 19 C -2.598 2.25 0.0 0
M  V30 20 C -1.299 4.5 0.0 0
M  V30 21 O -3.8971 1.5 0.0 0
M  V30 22 N -2.598 3.75 0.0 0
M  V30 23 C -1.299 6.0 0.0 0
M  V30 END ATOM
M  V30 BEGIN BOND
M  V30 1 1 1 2
M  V30 2 2 2 3
M  V30 3 1 2 4
M  V30 4 1 3 5
M  V30 5 1 3 6
M  V30 6 2 4 7
M  V30 7 2 5 8
M  V30 8 1 6 9
M  V30 9 1 6 10
M  V30 10 1 6 11
M  V30 11 1 7 12
M  V30 12 1 9 13
M  V30 13 1 10 14
M  V30 14 2 13 15
M  V30 15 1 13 16
M  V30 16 1 16 17
M  V30 17 1 16 18
M  V30 18 1 17 19
M  V30 19 1 18 20
M  V30 20 2 19 21
M  V30 21 1 19 22
M  V30 22 1 20 23
M  V30 23 1 7 8
M  V30 24 1 11 14
M  V30 25 1 20 22
M  V30 END BOND
M  V30 END CTAB
M  END
>  <ID>
ZINC000680450863

>  <name>
NA

>  <smiles>
CC1CC(CC(=O)N1)C(=O)NC1(CCC1)c1ccc(F)cc1F

$$$$
ZINC000680347545
Actelion Java MolfileCreator 2.0

  0  0  0  0  0  0              0 V3000
M  V30 BEGIN CTAB
M  V30 COUNTS 23 25 0 0 0
M  V30 BEGIN ATOM
M  V30 1 O 7.7942 -0.75 0.0 0
M  V30 2 C 6.4951 0.0 0.0 0
M  V30 3 N 6.4951 1.5 0.0 0
M  V30 4 C 5.1961 -0.7499 0.0 0
M  V30 5 C 5.1961 2.25 0.0 0
M  V30 6 C 3.8971 0.0 0.0 0
M  V30 7 C 3.8971 1.5 0.0 0
M  V30 8 C 5.1961 3.75 0.0 0
M  V30 9 C 2.598 -0.75 0.0 0
M  V30 10 C 3.8971 4.5 0.0 0
M  V30 11 O 2.598 -2.25 0.0 0
M  V30 12 N 1.299 0.0 0.0 0
M  V30 13 C 0.0 -0.75 0.0 0
M  V30 14 C -0.0785 0.7479 0.0 0
M  V30 15 C -0.1567 -2.2417 0.0 0
M  V30 16 C -1.3703 -0.1398 0.0 0
M  V30 17 C -1.415 1.4289 0.0 0
M  V30 18 C 1.1795 1.5649 0.0 0
M  V30 19 C -1.624 -2.5536 0.0 0
M  V30 20 C -2.374 -1.2546 0.0 0
M  V30 21 C -1.4935 2.9268 0.0 0
M  V30 22 C 1.1009 3.0628 0.0 0
M  V30 23 C -0.2355 3.7438 0.0 0
M  V30 END ATOM
M  V30 BEGIN BOND
M  V30 1 2 1 2
M  V30 2 1 2 3
M  V30 3 1 2 4
M  V30 4 1 3 5
M  V30 5 1 4 6
M  V30 6 1 5 7
M  V30 7 1 5 8
M  V30 8 1 6 9
M  V30 9 1 8 10
M  V30 10 2 9 11
M  V30 11 1 9 12
M  V30 12 1 12 13
M  V30 13 1 13 14
M  V30 14 1 13 15
M  V30 15 1 13 16
M  V30 16 2 14 17
M  V30 17 1 14 18
M  V30 18 1 15 19
M  V30 19 1 16 20
M  V30 20 1 17 21
M  V30 21 2 18 22
M  V30 22 2 21 23
M  V30 23 1 6 7
M  V30 24 1 19 20
M  V30 25 1 22 23
M  V30 END BOND
M  V30 END CTAB
M  END
>  <ID>
ZINC000680347545

>  <name>
NA

>  <smiles>
CCC1CC(CC(=O)N1)C(=O)NC1(CCCC1)c1ccccc1

$$$$
ZINC000680347990
Actelion Java MolfileCreator 2.0

  0  0  0  0  0  0              0 V3000
M  V30 BEGIN CTAB
M  V30 COUNTS 23 25 0 0 0
M  V30 BEGIN ATOM
M  V30 1 S -0.891 1.0432 0.0 0
M  V30 2 C -0.0523 0.4986 0.0 0
M  V30 3 C -0.6321 2.0091 0.0 0
M  V30 4 N 0.7248 1.1279 0.0 0
M  V30 5 C 0.0 -0.5 0.0 0
M  V30 6 C 0.3664 2.0615 0.0 0
M  V30 7 N 0.866 0.0 0.0 0
M  V30 8 C -0.1045 -1.4945 0.0 0
M  V30 9 C -0.9135 -0.0932 0.0 0
M  V30 10 C 0.911 2.9002 0.0 0
M  V30 11 C 1.732 -0.5 0.0 0
M  V30 12 C -1.0826 -1.7024 0.0 0
M  V30 13 C -1.5826 -0.8364 0.0 0
M  V30 14 O 2.598 0.0 0.0 0
M  V30 15 C 1.732 -1.5 0.0 0
M  V30 16 C 2.598 -1.9999 0.0 0
M  V30 17 C 0.866 -1.9999 0.0 0
M  V30 18 C 2.598 -2.9999 0.0 0
M  V30 19 C 0.866 -3.0 0.0 0
M  V30 20 O 3.4641 -3.4999 0.0 0
M  V30 21 N 1.732 -3.5 0.0 0
M  V30 22 C 0.0 -3.5 0.0 0
M  V30 23 C -0.866 -3.0 0.0 0
M  V30 END ATOM
M  V30 BEGIN BOND
M  V30 1 1 1 2
M  V30 2 1 1 3
M  V30 3 2 2 4
M  V30 4 1 2 5
M  V30 5 2 3 6
M  V30 6 1 5 7
M  V30 7 1 5 8
M  V30 8 1 5 9
M  V30 9 1 6 10
M  V30 10 1 7 11
M  V30 11 1 8 12
M  V30 12 1 9 13
M  V30 13 2 11 14
M  V30 14 1 11 15
M  V30 15 1 15 16
M  V30 16 1 15 17
M  V30 17 1 16 18
M  V30 18 1 17 19
M  V30 19 2 18 20
M  V30 20 1 18 21
M  V30 21 1 19 22
M  V30 22 1 22 23
M  V30 23 1 4 6
M  V30 24 1 12 13
M  V30 25 1 19 21
M  V30 END BOND
M  V30 END CTAB
M  END
>  <ID>
ZINC000680347990

>  <name>
NA

>  <smiles>
CCC1CC(CC(=O)N1)C(=O)NC1(CCCC1)c1nc(C)cs1

$$$$
ZINC000856742203
Actelion Java MolfileCreator 2.0

  0  0  0  0  0  0              0 V3000
M  V30 BEGIN CTAB
M  V30 COUNTS 25 27 0 0 0
M  V30 BEGIN ATOM
M  V30 1 O 6.9282 -0.5 0.0 0
M  V30 2 C 6.0621 0.0 0.0 0
M  V30 3 N 6.0621 0.9999 0.0 0
M  V30 4 C 5.1961 -0.4999 0.0 0
M  V30 5 N 6.8053 1.6691 0.0 0
M  V30 6 C 5.1961 1.4999 0.0 0
M  V30 7 C 4.3301 0.0 0.0 0
M  V30 8 C 6.3985 2.5826 0.0 0
M  V30 9 N 5.404 2.4781 0.0 0
M  V30 10 N 4.3301 1.0 0.0 0
M  V30 11 C 3.4641 -0.5 0.0 0
M  V30 12 N 6.8985 3.4487 0.0 0
M  V30 13 N 2.598 0.0 0.0 0
M  V30 14 C 1.732 -0.5 0.0 0
M  V30 15 C 1.732 -1.5 0.0 0
M  V30 16 C 0.866 0.0 0.0 0
M  V30 17 O 0.866 -2.0 0.0 0
M  V30 18 C 2.598 -1.9999 0.0 0
M  V30 19 C 0.866 1.0 0.0 0
M  V30 20 C 0.0 -0.5 0.0 0
M  V30 21 C 2.598 -3.0 0.0 0
M  V30 22 C 3.4641 -1.5 0.0 0
M  V30 23 C 3.4641 -3.5 0.0 0
M  V30 24 C 4.3301 -2.0 0.0 0
M  V30 25 C 4.3301 -3.0 0.0 0
M  V30 END ATOM
M  V30 BEGIN BOND
M  V30 1 2 1 2
M  V30 2 1 2 3
M  V30 3 1 2 4
M  V30 4 1 3 5
M  V30 5 1 3 6
M  V30 6 2 4 7
M  V30 7 1 5 8
M  V30 8 2 6 9
M  V30 9 1 6 10
M  V30 10 1 7 11
M  V30 11 2 8 12
M  V30 12 1 11 13
M  V30 13 1 13 14
M  V30 14 1 14 15
M  V30 15 1 14 16
M  V30 16 1 15 17
M  V30 17 1 15 18
M  V30 18 1 16 19
M  V30 19 1 16 20
M  V30 20 2 18 21
M  V30 21 1 18 22
M  V30 22 1 21 23
M  V30 23 2 22 24
M  V30 24 2 23 25
M  V30 25 1 7 10
M  V30 26 1 8 9
M  V30 27 1 24 25
M  V30 END BOND
M  V30 END CTAB
M  END
>  <ID>
ZINC000856742203

>  <name>
NA

>  <smiles>
CC(C)C(NCc1cc(=O)n2[nH]c(=N)nc2[nH]1)C(O)c1ccccc1

$$$$
ZINC001545432940
Actelion Java MolfileCreator 2.0

  0  0  0  0  0  0              0 V3000
M  V30 BEGIN CTAB
M  V30 COUNTS 23 25 0 0 0
M  V30 BEGIN ATOM
M  V30 1 Cl 1.5726 -3.5865 0.0 0
M  V30 2 C 1.625 -2.5879 0.0 0
M  V30 3 C 0.7863 -2.0432 0.0 0
M  V30 4 C 2.516 -2.1339 0.0 0
M  V30 5 C 0.8386 -1.0446 0.0 0
M  V30 6 C 2.5683 -1.1352 0.0 0
M  V30 7 C 1.7296 -0.5906 0.0 0
M  V30 8 C 0.0 -0.5 0.0 0
M  V30 9 N 0.866 0.0 0.0 0
M  V30 10 C -0.9135 -0.0932 0.0 0
M  V30 11 C -0.1045 -1.4945 0.0 0
M  V30 12 C 0.866 0.9999 0.0 0
M  V30 13 C -1.5826 -0.8364 0.0 0
M  V30 14 C -1.0826 -1.7024 0.0 0
M  V30 15 O 1.732 1.4999 0.0 0
M  V30 16 C 0.0 1.5 0.0 0
M  V30 17 C -0.866 1.0 0.0 0
M  V30 18 C 0.0 2.5 0.0 0
M  V30 19 C -1.732 1.4999 0.0 0
M  V30 20 C -0.866 2.9999 0.0 0
M  V30 21 O -2.598 1.0 0.0 0
M  V30 22 N -1.732 2.5 0.0 0
M  V30 23 C -0.866 4.0 0.0 0
M  V30 END ATOM
M  V30 BEGIN BOND
M  V30 1 1 1 2
M  V30 2 2 2 3
M  V30 3 1 2 4
M  V30 4 1 3 5
M  V30 5 2 4 6
M  V30 6 2 5 7
M  V30 7 1 5 8
M  V30 8 1 8 9
M  V30 9 1 8 10
M  V30 10 1 8 11
M  V30 11 1 9 12
M  V30 12 1 10 13
M  V30 13 1 11 14
M  V30 14 2 12 15
M  V30 15 1 12 16
M  V30 16 2 16 17
M  V30 17 1 16 18
M  V30 18 1 17 19
M  V30 19 2 18 20
M  V30 20 2 19 21
M  V30 21 1 19 22
M  V30 22 1 20 23
M  V30 23 1 6 7
M  V30 24 1 13 14
M  V30 25 1 20 22
M  V30 END BOND
M  V30 END CTAB
M  END
>  <ID>
ZINC001545432940

>  <name>
NA

>  <smiles>
Cc1cc(cc(=O)[nH]1)C(=O)NC1(CCCC1)c1cccc(Cl)c1

$$$$
ZINC000152367688
Actelion Java MolfileCreator 2.0

  0  0  0  0  0  0              0 V3000
M  V30 BEGIN CTAB
M  V30 COUNTS 23 25 0 0 0
M  V30 BEGIN ATOM
M  V30 1 O 2.598 3.9999 0.0 0
M  V30 2 C 2.598 2.9999 0.0 0
M  V30 3 N 3.4641 2.4999 0.0 0
M  V30 4 C 1.732 2.4999 0.0 0
M  V30 5 C 3.4641 1.4999 0.0 0
M  V30 6 C 1.732 1.4999 0.0 0 CFG=2
M  V30 7 C 2.598 0.9999 0.0 0
M  V30 8 C 0.866 0.9999 0.0 0
M  V30 9 O 0.0 1.5 0.0 0
M  V30 10 N 0.866 0.0 0.0 0
M  V30 11 C 0.0 -0.5 0.0 0
M  V30 12 C 0.8386 -1.0446 0.0 0
M  V30 13 C -0.9135 -0.0932 0.0 0
M  V30 14 C -0.1045 -1.4945 0.0 0
M  V30 15 C 0.7863 -2.0432 0.0 0
M  V30 16 C 1.7296 -0.5906 0.0 0
M  V30 17 C -1.5826 -0.8364 0.0 0
M  V30 18 C -1.0826 -1.7024 0.0 0
M  V30 19 C 1.625 -2.5879 0.0 0
M  V30 20 C 2.5683 -1.1352 0.0 0
M  V30 21 C 2.516 -2.1339 0.0 0
M  V30 22 O 3.3546 -2.6785 0.0 0
M  V30 23 C 4.2456 -2.2245 0.0 0
M  V30 END ATOM
M  V30 BEGIN BOND
M  V30 1 2 1 2
M  V30 2 1 2 3
M  V30 3 1 2 4
M  V30 4 1 3 5
M  V30 5 1 6 4
M  V30 6 1 5 7
M  V30 7 1 6 8 CFG=3
M  V30 8 2 8 9
M  V30 9 1 8 10
M  V30 10 1 10 11
M  V30 11 1 11 12
M  V30 12 1 11 13
M  V30 13 1 11 14
M  V30 14 2 12 15
M  V30 15 1 12 16
M  V30 16 1 13 17
M  V30 17 1 14 18
M  V30 18 1 15 19
M  V30 19 2 16 20
M  V30 20 2 19 21
M  V30 21 1 21 22
M  V30 22 1 22 23
M  V30 23 1 6 7
M  V30 24 1 17 18
M  V30 25 1 20 21
M  V30 END BOND
M  V30 BEGIN COLLECTION
M  V30 MDLV30/STERAC1 ATOMS=(1 6)
M  V30 END COLLECTION
M  V30 END CTAB
M  END
>  <ID>
ZINC000152367688

>  <name>
NA

>  <smiles>
COc1ccc(cc1)C1(CCCC1)NC(=O)C1CCNC(=O)C1

$$$$
ZINC000338587893
Actelion Java MolfileCreator 2.0

  0  0  0  0  0  0              0 V3000
M  V30 BEGIN CTAB
M  V30 COUNTS 25 28 0 0 0
M  V30 BEGIN ATOM
M  V30 1 F 1.23 5.1447 0.0 0
M  V30 2 C 0.549 3.8082 0.0 0 CFG=2
M  V30 3 C 0.0855 2.3816 0.0 0
M  V30 4 C 2.049 3.8082 0.0 0
M  V30 5 C -0.3326 5.0217 0.0 0
M  V30 6 N 1.299 1.4999 0.0 0
M  V30 7 C 2.5125 2.3816 0.0 0
M  V30 8 O 0.2774 6.3921 0.0 0
M  V30 9 C 1.299 0.0 0.0 0
M  V30 10 C 0.0 -0.75 0.0 0
M  V30 11 N -1.3703 -0.1398 0.0 0
M  V30 12 N -0.1567 -2.2417 0.0 0
M  V30 13 N -2.374 -1.2546 0.0 0
M  V30 14 C 0.8469 -3.3565 0.0 0
M  V30 15 C -1.624 -2.5536 0.0 0
M  V30 16 C 0.3833 -4.783 0.0 0
M  V30 17 C 2.3141 -3.0446 0.0 0
M  V30 18 N -2.0875 -3.9802 0.0 0
M  V30 19 C -1.0838 -5.0949 0.0 0
M  V30 20 C 1.387 -5.8978 0.0 0
M  V30 21 C 3.3178 -4.1593 0.0 0
M  V30 22 C -3.5547 -4.2921 0.0 0
M  V30 23 O -1.5473 -6.5215 0.0 0
M  V30 24 C 2.8542 -5.5859 0.0 0
M  V30 25 C -4.0182 -5.7186 0.0 0
M  V30 END ATOM
M  V30 BEGIN BOND
M  V30 1 1 2 1 CFG=1
M  V30 2 1 2 3
M  V30 3 1 2 4
M  V30 4 1 2 5
M  V30 5 1 3 6
M  V30 6 1 4 7
M  V30 7 1 5 8
M  V30 8 1 6 9
M  V30 9 1 9 10
M  V30 10 2 10 11
M  V30 11 1 10 12
M  V30 12 1 11 13
M  V30 13 1 12 14
M  V30 14 1 12 15
M  V30 15 2 14 16
M  V30 16 1 14 17
M  V30 17 1 15 18
M  V30 18 1 16 19
M  V30 19 1 16 20
M  V30 20 2 17 21
M  V30 21 1 18 22
M  V30 22 2 19 23
M  V30 23 2 20 24
M  V30 24 1 22 25
M  V30 25 1 6 7
M  V30 26 2 13 15
M  V30 27 1 18 19
M  V30 28 1 21 24
M  V30 END BOND
M  V30 BEGIN COLLECTION
M  V30 MDLV30/STERAC1 ATOMS=(1 2)
M  V30 END COLLECTION
M  V30 END CTAB
M  END
>  <ID>
ZINC000338587893

>  <name>
NA

>  <smiles>
CCn1c2nnc(CN3CCC(F)(CO)C3)n2c2ccccc2c1=O

$$$$
ZINC001054973985
Actelion Java MolfileCreator 2.0

  0  0  0  0  0  0              0 V3000
M  V30 BEGIN CTAB
M  V30 COUNTS 25 27 0 0 0
M  V30 BEGIN ATOM
M  V30 1 O 7.3033 3.5477 0.0 0
M  V30 2 C 6.5601 2.8786 0.0 0
M  V30 3 N 5.582 3.0865 0.0 0
M  V30 4 N 6.6646 1.884 0.0 0
M  V30 5 C 5.082 2.2205 0.0 0
M  V30 6 C 5.1752 4.0 0.0 0
M  V30 7 C 5.7511 1.4773 0.0 0
M  V30 8 C 4.0874 2.1159 0.0 0
M  V30 9 O 3.4997 2.9249 0.0 0
M  V30 10 N 3.6807 1.2024 0.0 0
M  V30 11 C 2.7026 0.9945 0.0 0
M  V30 12 C 4.1807 0.3364 0.0 0
M  V30 13 C 2.598 0.0 0.0 0
M  V30 14 C 3.5116 -0.4067 0.0 0
M  V30 15 N 1.732 -0.5 0.0 0
M  V30 16 C 3.7195 -1.3848 0.0 0
M  V30 17 C 0.866 0.0 0.0 0
M  V30 18 C 0.0 -0.5 0.0 0
M  V30 19 C -0.866 0.0 0.0 0
M  V30 20 C 0.0 -1.4999 0.0 0
M  V30 21 C -1.732 -0.4999 0.0 0
M  V30 22 C -0.866 -1.9999 0.0 0
M  V30 23 C -1.732 -1.4999 0.0 0
M  V30 24 C -2.598 -1.9999 0.0 0
M  V30 25 O -2.598 -2.9999 0.0 0
M  V30 END ATOM
M  V30 BEGIN BOND
M  V30 1 2 1 2
M  V30 2 1 2 3
M  V30 3 1 2 4
M  V30 4 1 3 5
M  V30 5 1 3 6
M  V30 6 1 4 7
M  V30 7 1 5 8
M  V30 8 2 8 9
M  V30 9 1 8 10
M  V30 10 1 10 11
M  V30 11 1 10 12
M  V30 12 1 11 13
M  V30 13 1 12 14
M  V30 14 1 13 15
M  V30 15 1 14 16
M  V30 16 1 15 17
M  V30 17 1 17 18
M  V30 18 2 18 19
M  V30 19 1 18 20
M  V30 20 1 19 21
M  V30 21 2 20 22
M  V30 22 2 21 23
M  V30 23 1 23 24
M  V30 24 1 24 25
M  V30 25 2 5 7
M  V30 26 1 13 14
M  V30 27 1 22 23
M  V30 END BOND
M  V30 END CTAB
M  END
>  <ID>
ZINC001054973985

>  <name>
NA

>  <smiles>
CC1CN(CC1NCc1ccc(CO)cc1)C(=O)c1c[nH]c(=O)n1C

$$$$
ZINC000494270543
Actelion Java MolfileCreator 2.0

  0  0  0  0  0  0              0 V3000
M  V30 BEGIN CTAB
M  V30 COUNTS 24 25 0 0 0
M  V30 BEGIN ATOM
M  V30 1 F 10.3923 -0.75 0.0 0
M  V30 2 C 9.0932 0.0 0.0 0
M  V30 3 F 9.0932 1.4999 0.0 0
M  V30 4 C 7.7942 -0.75 0.0 0 CFG=1
M  V30 5 O 7.7942 -2.25 0.0 0
M  V30 6 C 6.4951 0.0 0.0 0
M  V30 7 N 5.1961 -0.75 0.0 0
M  V30 8 C 3.8971 0.0 0.0 0
M  V30 9 O 3.8971 1.5 0.0 0
M  V30 10 C 2.598 -0.75 0.0 0
M  V30 11 O 2.598 -2.25 0.0 0
M  V30 12 N 1.299 0.0 0.0 0
M  V30 13 C 0.0 -0.75 0.0 0
M  V30 14 C -1.299 0.0 0.0 0
M  V30 15 C 0.0 -2.2499 0.0 0
M  V30 16 C -2.598 -0.7499 0.0 0
M  V30 17 C -1.299 -2.9999 0.0 0
M  V30 18 N -4.0246 -0.2864 0.0 0
M  V30 19 C -2.598 -2.2499 0.0 0
M  V30 20 C -4.9063 -1.4999 0.0 0
M  V30 21 C -4.4881 1.1401 0.0 0
M  V30 22 N -4.0246 -2.7135 0.0 0
M  V30 23 O -6.4063 -1.4999 0.0 0
M  V30 24 C -4.4881 -4.1401 0.0 0
M  V30 END ATOM
M  V30 BEGIN BOND
M  V30 1 1 1 2
M  V30 2 1 2 3
M  V30 3 1 4 2
M  V30 4 1 4 5 CFG=1
M  V30 5 1 4 6
M  V30 6 1 6 7
M  V30 7 1 7 8
M  V30 8 2 8 9
M  V30 9 1 8 10
M  V30 10 2 10 11
M  V30 11 1 10 12
M  V30 12 1 12 13
M  V30 13 2 13 14
M  V30 14 1 13 15
M  V30 15 1 14 16
M  V30 16 2 15 17
M  V30 17 1 16 18
M  V30 18 2 16 19
M  V30 19 1 18 20
M  V30 20 1 18 21
M  V30 21 1 19 22
M  V30 22 2 20 23
M  V30 23 1 22 24
M  V30 24 1 17 19
M  V30 25 1 20 22
M  V30 END BOND
M  V30 BEGIN COLLECTION
M  V30 MDLV30/STERAC1 ATOMS=(1 4)
M  V30 END COLLECTION
M  V30 END CTAB
M  END
>  <ID>
ZINC000494270543

>  <name>
NA

>  <smiles>
Cn1c2ccc(NC(=O)C(=O)NCC(O)C(F)F)cc2n(C)c1=O

$$$$
ZINC000979683202
Actelion Java MolfileCreator 2.0

  0  0  0  0  0  0              0 V3000
M  V30 BEGIN CTAB
M  V30 COUNTS 24 26 0 0 0
M  V30 BEGIN ATOM
M  V30 1 S 2.598 0.0 0.0 0
M  V30 2 C 1.732 -0.5 0.0 0
M  V30 3 C 3.4641 -0.5 0.0 0
M  V30 4 C 0.866 0.0 0.0 0
M  V30 5 O 0.866 1.0 0.0 0
M  V30 6 N 0.0 -0.5 0.0 0
M  V30 7 C -0.9135 -0.0932 0.0 0
M  V30 8 C -0.1045 -1.4945 0.0 0
M  V30 9 C -1.5826 -0.8364 0.0 0
M  V30 10 C -1.0826 -1.7024 0.0 0
M  V30 11 C -2.5608 -1.0443 0.0 0
M  V30 12 C -1.7518 -2.4455 0.0 0
M  V30 13 N -3.3039 -0.3751 0.0 0
M  V30 14 C -2.6653 -2.0388 0.0 0
M  V30 15 C -3.096 0.6029 0.0 0
M  V30 16 O -2.145 0.9119 0.0 0
M  V30 17 C -3.8392 1.272 0.0 0
M  V30 18 N -3.6312 2.2502 0.0 0
M  V30 19 C -4.7902 0.963 0.0 0
M  V30 20 C -4.3744 2.9193 0.0 0
M  V30 21 C -2.6802 2.5592 0.0 0
M  V30 22 C -5.5334 1.6322 0.0 0
M  V30 23 O -4.1665 3.8975 0.0 0
M  V30 24 C -5.3254 2.6103 0.0 0
M  V30 END ATOM
M  V30 BEGIN BOND
M  V30 1 1 1 2
M  V30 2 1 1 3
M  V30 3 1 2 4
M  V30 4 2 4 5
M  V30 5 1 4 6
M  V30 6 1 6 7
M  V30 7 1 6 8
M  V30 8 1 7 9
M  V30 9 1 8 10
M  V30 10 1 9 11
M  V30 11 1 10 12
M  V30 12 1 11 13
M  V30 13 1 11 14
M  V30 14 1 13 15
M  V30 15 2 15 16
M  V30 16 1 15 17
M  V30 17 1 17 18
M  V30 18 2 17 19
M  V30 19 1 18 20
M  V30 20 1 18 21
M  V30 21 1 19 22
M  V30 22 2 20 23
M  V30 23 1 20 24
M  V30 24 1 9 10
M  V30 25 1 12 14
M  V30 26 2 22 24
M  V30 END BOND
M  V30 END CTAB
M  END
>  <ID>
ZINC000979683202

>  <name>
NA

>  <smiles>
CSCC(=O)N1CC2CCC(NC(=O)c3cccc(=O)n3C)C2C1

$$$$
ZINC000360416271
Actelion Java MolfileCreator 2.0

  0  0  0  0  0  0              0 V3000
M  V30 BEGIN CTAB
M  V30 COUNTS 25 28 0 0 0
M  V30 BEGIN ATOM
M  V30 1 O 5.1961 1.5 0.0 0
M  V30 2 C 4.3301 1.0 0.0 0
M  V30 3 N 3.4641 1.5 0.0 0
M  V30 4 C 4.3301 0.0 0.0 0
M  V30 5 C 2.598 0.9999 0.0 0
M  V30 6 C 3.4641 2.5 0.0 0
M  V30 7 C 3.4641 -0.4999 0.0 0
M  V30 8 C 5.1961 -0.4999 0.0 0
M  V30 9 C 2.598 0.0 0.0 0 CFG=2
M  V30 10 C 3.4641 -1.4999 0.0 0
M  V30 11 C 5.1961 -1.4999 0.0 0
M  V30 12 C 1.732 -0.5 0.0 0
M  V30 13 C 4.3301 -1.9999 0.0 0
M  V30 14 O 1.732 -1.5 0.0 0
M  V30 15 N 0.866 0.0 0.0 0
M  V30 16 C 0.0 -0.5 0.0 0
M  V30 17 C -0.1305 0.4914 0.0 0
M  V30 18 C -0.2588 -1.4659 0.0 0
M  V30 19 C -0.9659 -0.2411 0.0 0
M  V30 20 C -1.0544 0.8741 0.0 0
M  V30 21 C 0.6628 1.1002 0.0 0
M  V30 22 C -1.2247 -1.2071 0.0 0
M  V30 23 C -1.1849 1.8655 0.0 0
M  V30 24 C 0.5323 2.0916 0.0 0
M  V30 25 C -0.3915 2.4743 0.0 0
M  V30 END ATOM
M  V30 BEGIN BOND
M  V30 1 2 1 2
M  V30 2 1 2 3
M  V30 3 1 2 4
M  V30 4 1 3 5
M  V30 5 1 3 6
M  V30 6 2 4 7
M  V30 7 1 4 8
M  V30 8 1 9 5
M  V30 9 1 7 10
M  V30 10 2 8 11
M  V30 11 1 9 12 CFG=3
M  V30 12 2 10 13
M  V30 13 2 12 14
M  V30 14 1 12 15
M  V30 15 1 15 16
M  V30 16 1 16 17
M  V30 17 1 16 18
M  V30 18 1 16 19
M  V30 19 2 17 20
M  V30 20 1 17 21
M  V30 21 1 18 22
M  V30 22 1 20 23
M  V30 23 2 21 24
M  V30 24 2 23 25
M  V30 25 1 7 9
M  V30 26 1 11 13
M  V30 27 1 19 22
M  V30 28 1 24 25
M  V30 END BOND
M  V30 BEGIN COLLECTION
M  V30 MDLV30/STERAC1 ATOMS=(1 9)
M  V30 END COLLECTION
M  V30 END CTAB
M  END
>  <ID>
ZINC000360416271

>  <name>
NA

>  <smiles>
CN1CC(C(=O)NC2(CCC2)c2ccccc2)c2ccccc2C1=O

$$$$
ZINC000621299738
Actelion Java MolfileCreator 2.0

  0  0  0  0  0  0              0 V3000
M  V30 BEGIN CTAB
M  V30 COUNTS 25 27 0 0 0
M  V30 BEGIN ATOM
M  V30 1 Cl 6.4951 4.5 0.0 0
M  V30 2 C 5.1961 3.75 0.0 0
M  V30 3 C 3.8971 4.5 0.0 0
M  V30 4 C 5.1961 2.25 0.0 0
M  V30 5 C 2.598 3.75 0.0 0
M  V30 6 C 3.8971 1.5 0.0 0
M  V30 7 Cl 1.299 4.5 0.0 0
M  V30 8 C 2.598 2.25 0.0 0
M  V30 9 C 3.8971 0.0 0.0 0 CFG=1
M  V30 10 N 2.598 -0.75 0.0 0
M  V30 11 C 5.1961 -0.75 0.0 0
M  V30 12 C 3.8971 -1.5 0.0 0
M  V30 13 C 1.299 0.0 0.0 0
M  V30 14 O 6.4951 0.0 0.0 0
M  V30 15 C 0.0 -0.75 0.0 0
M  V30 16 N -1.299 0.0 0.0 0
M  V30 17 C 0.0 -2.2499 0.0 0
M  V30 18 C -2.598 -0.7499 0.0 0
M  V30 19 C -1.299 -2.9999 0.0 0
M  V30 20 N -4.0246 -0.2864 0.0 0
M  V30 21 N -2.598 -2.2499 0.0 0
M  V30 22 O -1.299 -4.5 0.0 0
M  V30 23 C -4.9063 -1.4999 0.0 0
M  V30 24 N -4.0246 -2.7135 0.0 0
M  V30 25 N -6.4063 -1.4999 0.0 0
M  V30 END ATOM
M  V30 BEGIN BOND
M  V30 1 1 1 2
M  V30 2 2 2 3
M  V30 3 1 2 4
M  V30 4 1 3 5
M  V30 5 2 4 6
M  V30 6 1 5 7
M  V30 7 2 5 8
M  V30 8 1 9 6
M  V30 9 1 9 10
M  V30 10 1 9 11
M  V30 11 1 9 12 CFG=1
M  V30 12 1 10 13
M  V30 13 1 11 14
M  V30 14 1 13 15
M  V30 15 1 15 16
M  V30 16 2 15 17
M  V30 17 1 16 18
M  V30 18 1 17 19
M  V30 19 2 18 20
M  V30 20 1 18 21
M  V30 21 2 19 22
M  V30 22 1 20 23
M  V30 23 1 21 24
M  V30 24 2 23 25
M  V30 25 1 6 8
M  V30 26 1 19 21
M  V30 27 1 23 24
M  V30 END BOND
M  V30 BEGIN COLLECTION
M  V30 MDLV30/STERAC1 ATOMS=(1 9)
M  V30 END COLLECTION
M  V30 END CTAB
M  END
>  <ID>
ZINC000621299738

>  <name>
NA

>  <smiles>
CC(CO)(NCc1cc(=O)n2[nH]c(=N)nc2[nH]1)c1cc(Cl)cc(Cl)c1

$$$$
ZINC001460175548
Actelion Java MolfileCreator 2.0

  0  0  0  0  0  0              0 V3000
M  V30 BEGIN CTAB
M  V30 COUNTS 24 26 0 0 0
M  V30 BEGIN ATOM
M  V30 1 S 6.5664 -0.1398 0.0 0
M  V30 2 C 5.1961 -0.75 0.0 0
M  V30 3 C 7.5701 -1.2546 0.0 0
M  V30 4 N 5.3529 -2.2417 0.0 0
M  V30 5 C 3.8971 0.0 0.0 0 CFG=1
M  V30 6 C 6.8201 -2.5536 0.0 0
M  V30 7 N 2.598 -0.75 0.0 0
M  V30 8 C 3.8971 1.5 0.0 0
M  V30 9 C 7.4302 -3.9239 0.0 0
M  V30 10 C 1.299 0.0 0.0 0
M  V30 11 F 2.3971 1.5 0.0 0
M  V30 12 F 3.8971 3.0 0.0 0
M  V30 13 F 5.3971 1.5 0.0 0
M  V30 14 C 0.0 -0.75 0.0 0
M  V30 15 N -1.299 0.0 0.0 0
M  V30 16 C 0.0 -2.2499 0.0 0
M  V30 17 C -2.598 -0.7499 0.0 0
M  V30 18 C -1.299 -2.9999 0.0 0
M  V30 19 N -4.0246 -0.2864 0.0 0
M  V30 20 N -2.598 -2.2499 0.0 0
M  V30 21 O -1.299 -4.4999 0.0 0
M  V30 22 C -4.9063 -1.4999 0.0 0
M  V30 23 N -4.0246 -2.7135 0.0 0
M  V30 24 N -6.4063 -1.4999 0.0 0
M  V30 END ATOM
M  V30 BEGIN BOND
M  V30 1 1 1 2
M  V30 2 1 1 3
M  V30 3 2 2 4
M  V30 4 1 5 2
M  V30 5 2 3 6
M  V30 6 1 5 7 CFG=1
M  V30 7 1 5 8
M  V30 8 1 6 9
M  V30 9 1 7 10
M  V30 10 1 8 11
M  V30 11 1 8 12
M  V30 12 1 8 13
M  V30 13 1 10 14
M  V30 14 1 14 15
M  V30 15 2 14 16
M  V30 16 1 15 17
M  V30 17 1 16 18
M  V30 18 2 17 19
M  V30 19 1 17 20
M  V30 20 2 18 21
M  V30 21 1 19 22
M  V30 22 1 20 23
M  V30 23 2 22 24
M  V30 24 1 4 6
M  V30 25 1 18 20
M  V30 26 1 22 23
M  V30 END BOND
M  V30 BEGIN COLLECTION
M  V30 MDLV30/STERAC1 ATOMS=(1 5)
M  V30 END COLLECTION
M  V30 END CTAB
M  END
>  <ID>
ZINC001460175548

>  <name>
NA

>  <smiles>
Cc1csc(n1)C(NCc1cc(=O)n2[nH]c(=N)nc2[nH]1)C(F)(F)F

$$$$
ZINC000649158547
Actelion Java MolfileCreator 2.0

  0  0  0  0  0  0              0 V3000
M  V30 BEGIN CTAB
M  V30 COUNTS 24 25 0 0 0
M  V30 BEGIN ATOM
M  V30 1 O 6.2839 -3.8478 0.0 0
M  V30 2 C 5.6961 -3.0388 0.0 0
M  V30 3 N 4.6961 -3.0388 0.0 0
M  V30 4 C 6.0051 -2.0877 0.0 0
M  V30 5 C 4.3871 -2.0877 0.0 0
M  V30 6 C 4.1083 -3.8478 0.0 0
M  V30 7 N 5.1961 -1.5 0.0 0
M  V30 8 C 6.9562 -1.7787 0.0 0
M  V30 9 C 5.1961 -0.5 0.0 0
M  V30 10 O 6.0621 0.0 0.0 0
M  V30 11 C 4.3301 0.0 0.0 0
M  V30 12 N 3.4641 -0.5 0.0 0
M  V30 13 C 4.3301 1.0 0.0 0
M  V30 14 C 2.598 0.0 0.0 0
M  V30 15 C 5.1961 1.4999 0.0 0
M  V30 16 O 2.598 1.0 0.0 0
M  V30 17 C 1.732 -0.5 0.0 0
M  V30 18 N 5.3006 2.4945 0.0 0
M  V30 19 C 6.1096 1.0932 0.0 0
M  V30 20 C 0.866 0.0 0.0 0
M  V30 21 C 6.2788 2.7024 0.0 0
M  V30 22 N 6.7788 1.8364 0.0 0
M  V30 23 C 0.866 1.0 0.0 0
M  V30 24 C 0.0 -0.5 0.0 0
M  V30 END ATOM
M  V30 BEGIN BOND
M  V30 1 2 1 2
M  V30 2 1 2 3
M  V30 3 1 2 4
M  V30 4 1 3 5
M  V30 5 1 3 6
M  V30 6 1 4 7
M  V30 7 1 4 8
M  V30 8 1 7 9
M  V30 9 2 9 10
M  V30 10 1 9 11
M  V30 11 1 11 12
M  V30 12 1 11 13
M  V30 13 1 12 14
M  V30 14 1 13 15
M  V30 15 2 14 16
M  V30 16 1 14 17
M  V30 17 1 15 18
M  V30 18 2 15 19
M  V30 19 1 17 20
M  V30 20 2 18 21
M  V30 21 1 19 22
M  V30 22 1 20 23
M  V30 23 1 20 24
M  V30 24 1 5 7
M  V30 25 1 21 22
M  V30 END BOND
M  V30 END CTAB
M  END
>  <ID>
ZINC000649158547

>  <name>
NA

>  <smiles>
CC(C)CC(=O)NC(Cc1c[nH]cn1)C(=O)N1CN(C)C(=O)C1C

$$$$
ZINC000951166387
Actelion Java MolfileCreator 2.0

  0  0  0  0  0  0              0 V3000
M  V30 BEGIN CTAB
M  V30 COUNTS 24 26 0 0 0
M  V30 BEGIN ATOM
M  V30 1 F 4.9535 -2.6159 0.0 0
M  V30 2 C 4.5467 -1.7024 0.0 0
M  V30 3 C 5.0467 -0.8364 0.0 0
M  V30 4 C 3.5686 -1.4945 0.0 0
M  V30 5 N 4.3776 -0.0932 0.0 0
M  V30 6 C 3.4641 -0.5 0.0 0
M  V30 7 C 2.598 0.0 0.0 0
M  V30 8 O 2.598 1.0 0.0 0
M  V30 9 N 1.732 -0.5 0.0 0
M  V30 10 C 0.866 0.0 0.0 0
M  V30 11 C 0.0 -0.5 0.0 0 CFG=2
M  V30 12 N -0.9659 -0.2411 0.0 0
M  V30 13 C -0.2588 -1.4659 0.0 0
M  V30 14 C -1.4659 0.6248 0.0 0
M  V30 15 C -1.2247 -1.2071 0.0 0
M  V30 16 O -2.4659 0.6248 0.0 0
M  V30 17 C -0.9659 1.4908 0.0 0
M  V30 18 C -1.4659 2.3568 0.0 0
M  V30 19 N -1.0591 3.2704 0.0 0
M  V30 20 C -2.4604 2.4614 0.0 0
M  V30 21 C -1.8023 3.9395 0.0 0
M  V30 22 O -3.1295 1.7182 0.0 0
M  V30 23 N -2.6683 3.4395 0.0 0
M  V30 24 O -1.6978 4.934 0.0 0
M  V30 END ATOM
M  V30 BEGIN BOND
M  V30 1 1 1 2
M  V30 2 2 2 3
M  V30 3 1 2 4
M  V30 4 1 3 5
M  V30 5 2 4 6
M  V30 6 1 6 7
M  V30 7 2 7 8
M  V30 8 1 7 9
M  V30 9 1 9 10
M  V30 10 1 11 10 CFG=1
M  V30 11 1 11 12
M  V30 12 1 11 13
M  V30 13 1 12 14
M  V30 14 1 12 15
M  V30 15 2 14 16
M  V30 16 1 14 17
M  V30 17 1 17 18
M  V30 18 1 18 19
M  V30 19 2 18 20
M  V30 20 1 19 21
M  V30 21 1 20 22
M  V30 22 1 20 23
M  V30 23 2 21 24
M  V30 24 1 5 6
M  V30 25 1 13 15
M  V30 26 1 21 23
M  V30 END BOND
M  V30 BEGIN COLLECTION
M  V30 MDLV30/STERAC1 ATOMS=(1 11)
M  V30 END COLLECTION
M  V30 END CTAB
M  END
>  <ID>
ZINC000951166387

>  <name>
NA

>  <smiles>
Oc1[nH]c(=O)[nH]c1CC(=O)N1CCC1CNC(=O)c1cc(F)c[nH]1

$$$$
ZINC001438385400
Actelion Java MolfileCreator 2.0

  0  0  0  0  0  0              0 V3000
M  V30 BEGIN CTAB
M  V30 COUNTS 25 27 0 0 0
M  V30 BEGIN ATOM
M  V30 1 F 6.0621 -1.9999 0.0 0
M  V30 2 C 5.1961 -1.4999 0.0 0
M  V30 3 C 5.1961 -0.5 0.0 0
M  V30 4 C 4.3301 -1.9999 0.0 0
M  V30 5 N 4.3301 0.0 0.0 0
M  V30 6 C 3.4641 -1.5 0.0 0
M  V30 7 C 3.4641 -0.5 0.0 0
M  V30 8 C 2.598 0.0 0.0 0
M  V30 9 N 1.732 -0.5 0.0 0
M  V30 10 C 0.866 0.0 0.0 0
M  V30 11 C 0.0 -0.5 0.0 0
M  V30 12 N 0.8386 -1.0446 0.0 0
M  V30 13 C -0.9135 -0.0932 0.0 0
M  V30 14 C -0.1045 -1.4945 0.0 0
M  V30 15 C 0.7863 -2.0432 0.0 0
M  V30 16 C -1.5826 -0.8364 0.0 0
M  V30 17 C -1.0826 -1.7024 0.0 0
M  V30 18 O -0.1046 -2.4972 0.0 0
M  V30 19 C 1.625 -2.5879 0.0 0 CFG=2
M  V30 20 C 1.5726 -3.5865 0.0 0
M  V30 21 C 2.516 -2.1339 0.0 0
M  V30 22 C 2.4113 -4.1311 0.0 0
M  V30 23 C 3.3546 -2.6785 0.0 0
M  V30 24 O 2.359 -5.1298 0.0 0
M  V30 25 N 3.3023 -3.6771 0.0 0
M  V30 END ATOM
M  V30 BEGIN BOND
M  V30 1 1 1 2
M  V30 2 2 2 3
M  V30 3 1 2 4
M  V30 4 1 3 5
M  V30 5 2 4 6
M  V30 6 2 5 7
M  V30 7 1 7 8
M  V30 8 1 8 9
M  V30 9 1 9 10
M  V30 10 1 10 11
M  V30 11 1 11 12
M  V30 12 1 11 13
M  V30 13 1 11 14
M  V30 14 1 12 15
M  V30 15 1 13 16
M  V30 16 1 14 17
M  V30 17 2 15 18
M  V30 18 1 19 15 CFG=1
M  V30 19 1 19 20
M  V30 20 1 19 21
M  V30 21 1 20 22
M  V30 22 1 21 23
M  V30 23 2 22 24
M  V30 24 1 22 25
M  V30 25 1 6 7
M  V30 26 1 16 17
M  V30 27 1 23 25
M  V30 END BOND
M  V30 BEGIN COLLECTION
M  V30 MDLV30/STERAC1 ATOMS=(1 19)
M  V30 END COLLECTION
M  V30 END CTAB
M  END
>  <ID>
ZINC001438385400

>  <name>
NA

>  <smiles>
Fc1ccc(CNCC2(CCCC2)NC(=O)C2CCNC(=O)C2)nc1

$$$$
ZINC000679652185
Actelion Java MolfileCreator 2.0

  0  0  0  0  0  0              0 V3000
M  V30 BEGIN CTAB
M  V30 COUNTS 23 25 0 0 0
M  V30 BEGIN ATOM
M  V30 1 O 2.598 3.9999 0.0 0
M  V30 2 C 2.598 2.9999 0.0 0
M  V30 3 N 3.4641 2.4999 0.0 0
M  V30 4 C 1.732 2.4999 0.0 0
M  V30 5 C 3.4641 1.4999 0.0 0
M  V30 6 C 1.732 1.4999 0.0 0
M  V30 7 C 2.598 0.9999 0.0 0
M  V30 8 C 4.3301 0.9999 0.0 0
M  V30 9 C 0.866 0.9999 0.0 0
M  V30 10 O 0.0 1.5 0.0 0
M  V30 11 N 0.866 0.0 0.0 0
M  V30 12 C 0.0 -0.5 0.0 0
M  V30 13 C 0.8386 -1.0446 0.0 0
M  V30 14 C -0.9135 -0.0932 0.0 0
M  V30 15 C -0.1045 -1.4945 0.0 0
M  V30 16 C 0.7863 -2.0432 0.0 0
M  V30 17 C 1.7296 -0.5906 0.0 0
M  V30 18 C -1.5826 -0.8364 0.0 0
M  V30 19 C -1.0826 -1.7024 0.0 0
M  V30 20 C 1.625 -2.5879 0.0 0
M  V30 21 C 2.5683 -1.1352 0.0 0
M  V30 22 C 2.516 -2.1339 0.0 0
M  V30 23 C 1.5726 -3.5865 0.0 0
M  V30 END ATOM
M  V30 BEGIN BOND
M  V30 1 2 1 2
M  V30 2 1 2 3
M  V30 3 1 2 4
M  V30 4 1 3 5
M  V30 5 1 4 6
M  V30 6 1 5 7
M  V30 7 1 5 8
M  V30 8 1 6 9
M  V30 9 2 9 10
M  V30 10 1 9 11
M  V30 11 1 11 12
M  V30 12 1 12 13
M  V30 13 1 12 14
M  V30 14 1 12 15
M  V30 15 2 13 16
M  V30 16 1 13 17
M  V30 17 1 14 18
M  V30 18 1 15 19
M  V30 19 1 16 20
M  V30 20 2 17 21
M  V30 21 2 20 22
M  V30 22 1 20 23
M  V30 23 1 6 7
M  V30 24 1 18 19
M  V30 25 1 21 22
M  V30 END BOND
M  V30 END CTAB
M  END
>  <ID>
ZINC000679652185

>  <name>
NA

>  <smiles>
CC1CC(CC(=O)N1)C(=O)NC1(CCCC1)c1cccc(C)c1

$$$$
ZINC000050164326
Actelion Java MolfileCreator 2.0

  0  0  0  0  0  0              0 V3000
M  V30 BEGIN CTAB
M  V30 COUNTS 25 26 0 0 0
M  V30 BEGIN ATOM
M  V30 1 F 8.3432 1.299 0.0 0
M  V30 2 C 9.0932 0.0 0.0 0
M  V30 3 F 10.3923 0.7499 0.0 0
M  V30 4 F 9.8432 -1.299 0.0 0
M  V30 5 C 7.7942 -0.75 0.0 0 CFG=1
M  V30 6 O 7.7942 -2.25 0.0 0
M  V30 7 C 6.4951 0.0 0.0 0
M  V30 8 N 5.1961 -0.75 0.0 0
M  V30 9 C 3.8971 0.0 0.0 0
M  V30 10 O 3.8971 1.5 0.0 0
M  V30 11 C 2.598 -0.75 0.0 0
M  V30 12 O 2.598 -2.25 0.0 0
M  V30 13 N 1.299 0.0 0.0 0
M  V30 14 C 0.0 -0.75 0.0 0
M  V30 15 C -1.299 0.0 0.0 0
M  V30 16 C 0.0 -2.2499 0.0 0
M  V30 17 C -2.598 -0.7499 0.0 0
M  V30 18 C -1.299 -2.9999 0.0 0
M  V30 19 N -4.0246 -0.2864 0.0 0
M  V30 20 C -2.598 -2.2499 0.0 0
M  V30 21 C -4.9063 -1.4999 0.0 0
M  V30 22 C -4.4881 1.1401 0.0 0
M  V30 23 N -4.0246 -2.7135 0.0 0
M  V30 24 O -6.4063 -1.4999 0.0 0
M  V30 25 C -4.4881 -4.1401 0.0 0
M  V30 END ATOM
M  V30 BEGIN BOND
M  V30 1 1 1 2
M  V30 2 1 2 3
M  V30 3 1 2 4
M  V30 4 1 5 2
M  V30 5 1 5 6 CFG=1
M  V30 6 1 5 7
M  V30 7 1 7 8
M  V30 8 1 8 9
M  V30 9 2 9 10
M  V30 10 1 9 11
M  V30 11 2 11 12
M  V30 12 1 11 13
M  V30 13 1 13 14
M  V30 14 2 14 15
M  V30 15 1 14 16
M  V30 16 1 15 17
M  V30 17 2 16 18
M  V30 18 1 17 19
M  V30 19 2 17 20
M  V30 20 1 19 21
M  V30 21 1 19 22
M  V30 22 1 20 23
M  V30 23 2 21 24
M  V30 24 1 23 25
M  V30 25 1 18 20
M  V30 26 1 21 23
M  V30 END BOND
M  V30 BEGIN COLLECTION
M  V30 MDLV30/STERAC1 ATOMS=(1 5)
M  V30 END COLLECTION
M  V30 END CTAB
M  END
>  <ID>
ZINC000050164326

>  <name>
NA

>  <smiles>
Cn1c2ccc(NC(=O)C(=O)NCC(O)C(F)(F)F)cc2n(C)c1=O

$$$$
ZINC000544686678
Actelion Java MolfileCreator 2.0

  0  0  0  0  0  0              0 V3000
M  V30 BEGIN CTAB
M  V30 COUNTS 25 28 0 0 0
M  V30 BEGIN ATOM
M  V30 1 O 7.7942 -0.7499 0.0 0
M  V30 2 C 6.4951 0.0 0.0 0
M  V30 3 N 6.4951 1.5 0.0 0
M  V30 4 C 5.1961 -0.7499 0.0 0
M  V30 5 N 7.6099 2.5036 0.0 0
M  V30 6 C 5.1961 2.25 0.0 0
M  V30 7 C 3.8971 0.0 0.0 0
M  V30 8 C 6.9998 3.874 0.0 0
M  V30 9 N 3.8971 1.5 0.0 0
M  V30 10 N 5.508 3.7172 0.0 0
M  V30 11 C 2.598 -0.75 0.0 0
M  V30 12 O 2.598 -2.25 0.0 0
M  V30 13 N 1.299 0.0 0.0 0
M  V30 14 C 0.0 -0.75 0.0 0
M  V30 15 C -0.0785 0.7479 0.0 0
M  V30 16 C -0.1567 -2.2417 0.0 0
M  V30 17 C -1.3703 -0.1398 0.0 0
M  V30 18 C -1.415 1.4289 0.0 0
M  V30 19 C 1.1795 1.5649 0.0 0
M  V30 20 C -1.624 -2.5536 0.0 0
M  V30 21 C -2.374 -1.2546 0.0 0
M  V30 22 C -1.4935 2.9268 0.0 0
M  V30 23 C 1.1009 3.0628 0.0 0
M  V30 24 C -0.2355 3.7438 0.0 0
M  V30 25 C -2.83 3.6078 0.0 0
M  V30 END ATOM
M  V30 BEGIN BOND
M  V30 1 2 1 2
M  V30 2 1 2 3
M  V30 3 1 2 4
M  V30 4 1 3 5
M  V30 5 1 3 6
M  V30 6 2 4 7
M  V30 7 1 5 8
M  V30 8 2 6 9
M  V30 9 1 6 10
M  V30 10 1 7 11
M  V30 11 2 11 12
M  V30 12 1 11 13
M  V30 13 1 13 14
M  V30 14 1 14 15
M  V30 15 1 14 16
M  V30 16 1 14 17
M  V30 17 2 15 18
M  V30 18 1 15 19
M  V30 19 1 16 20
M  V30 20 1 17 21
M  V30 21 1 18 22
M  V30 22 2 19 23
M  V30 23 2 22 24
M  V30 24 1 22 25
M  V30 25 1 7 9
M  V30 26 2 8 10
M  V30 27 1 20 21
M  V30 28 1 23 24
M  V30 END BOND
M  V30 END CTAB
M  END
>  <ID>
ZINC000544686678

>  <name>
NA

>  <smiles>
Cc1cccc(c1)C1(CCCC1)NC(=O)c1cc(=O)n2[nH]cnc2n1

$$$$
ZINC001559759979
Actelion Java MolfileCreator 2.0

  0  0  0  0  0  0              0 V3000
M  V30 BEGIN CTAB
M  V30 COUNTS 23 25 0 0 0
M  V30 BEGIN ATOM
M  V30 1 O 6.9282 -0.5 0.0 0
M  V30 2 C 6.0621 0.0 0.0 0
M  V30 3 N 6.0621 0.9999 0.0 0
M  V30 4 C 5.1961 -0.4999 0.0 0
M  V30 5 N 6.8053 1.6691 0.0 0
M  V30 6 C 5.1961 1.4999 0.0 0
M  V30 7 C 4.3301 0.0 0.0 0
M  V30 8 C 6.3985 2.5826 0.0 0
M  V30 9 N 5.404 2.4781 0.0 0
M  V30 10 N 4.3301 1.0 0.0 0
M  V30 11 C 3.4641 -0.5 0.0 0
M  V30 12 N 6.8985 3.4487 0.0 0
M  V30 13 N 2.598 0.0 0.0 0
M  V30 14 C 1.732 -0.5 0.0 0 CFG=2
M  V30 15 C 1.732 -1.5 0.0 0
M  V30 16 C 0.866 0.0 0.0 0
M  V30 17 C 2.598 -0.9999 0.0 0
M  V30 18 C 0.866 -1.9999 0.0 0
M  V30 19 C 2.598 -2.0 0.0 0
M  V30 20 O 0.0 -0.5 0.0 0
M  V30 21 C 0.866 -2.9999 0.0 0
M  V30 22 C 2.598 -3.0 0.0 0
M  V30 23 C 1.732 -3.4999 0.0 0
M  V30 END ATOM
M  V30 BEGIN BOND
M  V30 1 2 1 2
M  V30 2 1 2 3
M  V30 3 1 2 4
M  V30 4 1 3 5
M  V30 5 1 3 6
M  V30 6 2 4 7
M  V30 7 1 5 8
M  V30 8 2 6 9
M  V30 9 1 6 10
M  V30 10 1 7 11
M  V30 11 2 8 12
M  V30 12 1 11 13
M  V30 13 1 14 13
M  V30 14 1 14 15
M  V30 15 1 14 16
M  V30 16 1 14 17 CFG=1
M  V30 17 2 15 18
M  V30 18 1 15 19
M  V30 19 1 16 20
M  V30 20 1 18 21
M  V30 21 2 19 22
M  V30 22 2 21 23
M  V30 23 1 7 10
M  V30 24 1 8 9
M  V30 25 1 22 23
M  V30 END BOND
M  V30 BEGIN COLLECTION
M  V30 MDLV30/STERAC1 ATOMS=(1 14)
M  V30 END COLLECTION
M  V30 END CTAB
M  END
>  <ID>
ZINC001559759979

>  <name>
NA

>  <smiles>
CC(CO)(NCc1cc(=O)n2[nH]c(=N)nc2[nH]1)c1ccccc1

$$$$
ZINC001642477614
Actelion Java MolfileCreator 2.0

  0  0  0  0  0  0              0 V3000
M  V30 BEGIN CTAB
M  V30 COUNTS 24 26 0 0 0
M  V30 BEGIN ATOM
M  V30 1 S 6.4951 0.0 0.0 0
M  V30 2 O 7.7942 -0.75 0.0 0
M  V30 3 C 5.1961 -0.75 0.0 0
M  V30 4 C 6.4951 1.5 0.0 0
M  V30 5 C 3.8971 0.0 0.0 0
M  V30 6 N 2.598 -0.75 0.0 0
M  V30 7 C 3.8971 1.5 0.0 0
M  V30 8 C 1.299 0.0 0.0 0
M  V30 9 C 5.1961 2.25 0.0 0
M  V30 10 C 2.598 2.2499 0.0 0
M  V30 11 C 0.0 -0.75 0.0 0
M  V30 12 C 5.1961 3.75 0.0 0
M  V30 13 C 2.598 3.75 0.0 0
M  V30 14 N -1.299 0.0 0.0 0
M  V30 15 C 0.0 -2.2499 0.0 0
M  V30 16 C 3.8971 4.5 0.0 0
M  V30 17 C -2.598 -0.7499 0.0 0
M  V30 18 C -1.299 -2.9999 0.0 0
M  V30 19 N -4.0246 -0.2864 0.0 0
M  V30 20 N -2.598 -2.2499 0.0 0
M  V30 21 O -1.299 -4.4999 0.0 0
M  V30 22 C -4.9063 -1.4999 0.0 0
M  V30 23 N -4.0246 -2.7135 0.0 0
M  V30 24 N -6.4063 -1.4999 0.0 0
M  V30 END ATOM
M  V30 BEGIN BOND
M  V30 1 2 1 2
M  V30 2 1 1 3
M  V30 3 1 1 4
M  V30 4 1 3 5
M  V30 5 1 5 6
M  V30 6 1 5 7
M  V30 7 1 6 8
M  V30 8 2 7 9
M  V30 9 1 7 10
M  V30 10 1 8 11
M  V30 11 1 9 12
M  V30 12 2 10 13
M  V30 13 1 11 14
M  V30 14 2 11 15
M  V30 15 2 12 16
M  V30 16 1 14 17
M  V30 17 1 15 18
M  V30 18 2 17 19
M  V30 19 1 17 20
M  V30 20 2 18 21
M  V30 21 1 19 22
M  V30 22 1 20 23
M  V30 23 2 22 24
M  V30 24 1 13 16
M  V30 25 1 18 20
M  V30 26 1 22 23
M  V30 END BOND
M  V30 END CTAB
M  END
>  <ID>
ZINC001642477614

>  <name>
NA

>  <smiles>
C[S+]([O-])CC(NCc1cc(=O)n2[nH]c(=N)nc2[nH]1)c1ccccc1

$$$$
ZINC000332302444
Actelion Java MolfileCreator 2.0

  0  0  0  0  0  0              0 V3000
M  V30 BEGIN CTAB
M  V30 COUNTS 23 25 0 0 0
M  V30 BEGIN ATOM
M  V30 1 F 9.0932 -3.0 0.0 0
M  V30 2 C 7.7942 -2.25 0.0 0
M  V30 3 C 7.7942 -0.75 0.0 0
M  V30 4 C 6.4952 -3.0 0.0 0
M  V30 5 C 6.4952 0.0 0.0 0
M  V30 6 C 5.1961 -2.25 0.0 0
M  V30 7 N 6.4952 1.5 0.0 0
M  V30 8 C 5.1961 -0.75 0.0 0
M  V30 9 C 5.1961 2.25 0.0 0
M  V30 10 C 3.8971 0.0 0.0 0
M  V30 11 O 5.1961 3.75 0.0 0
M  V30 12 C 3.8971 1.5 0.0 0
M  V30 13 C 2.598 -0.75 0.0 0 CFG=2
M  V30 14 O 2.598 -2.25 0.0 0
M  V30 15 N 1.299 0.0 0.0 0
M  V30 16 C 0.0 -0.75 0.0 0
M  V30 17 C -1.299 0.0 0.0 0
M  V30 18 C 0.0 -2.25 0.0 0
M  V30 19 C -2.598 -0.75 0.0 0
M  V30 20 C -1.299 -3.0 0.0 0
M  V30 21 C -2.598 -2.25 0.0 0
M  V30 22 F -4.098 -2.2499 0.0 0
M  V30 23 F -3.348 -3.549 0.0 0
M  V30 END ATOM
M  V30 BEGIN BOND
M  V30 1 1 1 2
M  V30 2 2 2 3
M  V30 3 1 2 4
M  V30 4 1 3 5
M  V30 5 2 4 6
M  V30 6 1 5 7
M  V30 7 2 5 8
M  V30 8 1 7 9
M  V30 9 1 8 10
M  V30 10 2 9 11
M  V30 11 1 9 12
M  V30 12 1 13 10
M  V30 13 1 13 14 CFG=3
M  V30 14 1 13 15
M  V30 15 1 15 16
M  V30 16 1 16 17
M  V30 17 1 16 18
M  V30 18 1 17 19
M  V30 19 1 18 20
M  V30 20 1 19 21
M  V30 21 1 21 22
M  V30 22 1 21 23
M  V30 23 1 6 8
M  V30 24 2 10 12
M  V30 25 1 20 21
M  V30 END BOND
M  V30 BEGIN COLLECTION
M  V30 MDLV30/STERAC1 ATOMS=(1 13)
M  V30 END COLLECTION
M  V30 END CTAB
M  END
>  <ID>
ZINC000332302444

>  <name>
NA

>  <smiles>
OC(NC1CCC(F)(F)CC1)c1cc(=O)[nH]c2cc(F)ccc12

$$$$
ZINC000680431933
Actelion Java MolfileCreator 2.0

  0  0  0  0  0  0              0 V3000
M  V30 BEGIN CTAB
M  V30 COUNTS 23 25 0 0 0
M  V30 BEGIN ATOM
M  V30 1 F 3.3546 -2.6785 0.0 0
M  V30 2 C 2.516 -2.1339 0.0 0
M  V30 3 C 2.5683 -1.1352 0.0 0
M  V30 4 C 1.625 -2.5879 0.0 0
M  V30 5 C 1.7296 -0.5906 0.0 0
M  V30 6 C 0.7863 -2.0432 0.0 0
M  V30 7 C 0.8386 -1.0446 0.0 0
M  V30 8 C 0.0 -0.5 0.0 0
M  V30 9 N 0.866 0.0 0.0 0
M  V30 10 C -0.9135 -0.0932 0.0 0
M  V30 11 C -0.1045 -1.4945 0.0 0
M  V30 12 C 0.866 0.9999 0.0 0
M  V30 13 C -1.5826 -0.8364 0.0 0
M  V30 14 C -1.0826 -1.7024 0.0 0
M  V30 15 O 1.732 1.4999 0.0 0
M  V30 16 C 0.0 1.5 0.0 0
M  V30 17 C -0.866 1.0 0.0 0
M  V30 18 C 0.0 2.5 0.0 0
M  V30 19 C -1.732 1.4999 0.0 0
M  V30 20 C -0.866 2.9999 0.0 0
M  V30 21 O -2.598 1.0 0.0 0
M  V30 22 N -1.732 2.5 0.0 0
M  V30 23 C -0.866 4.0 0.0 0
M  V30 END ATOM
M  V30 BEGIN BOND
M  V30 1 1 1 2
M  V30 2 2 2 3
M  V30 3 1 2 4
M  V30 4 1 3 5
M  V30 5 2 4 6
M  V30 6 2 5 7
M  V30 7 1 7 8
M  V30 8 1 8 9
M  V30 9 1 8 10
M  V30 10 1 8 11
M  V30 11 1 9 12
M  V30 12 1 10 13
M  V30 13 1 11 14
M  V30 14 2 12 15
M  V30 15 1 12 16
M  V30 16 1 16 17
M  V30 17 1 16 18
M  V30 18 1 17 19
M  V30 19 1 18 20
M  V30 20 2 19 21
M  V30 21 1 19 22
M  V30 22 1 20 23
M  V30 23 1 6 7
M  V30 24 1 13 14
M  V30 25 1 20 22
M  V30 END BOND
M  V30 END CTAB
M  END
>  <ID>
ZINC000680431933

>  <name>
NA

>  <smiles>
CC1CC(CC(=O)N1)C(=O)NC1(CCCC1)c1ccc(F)cc1

$$$$
ZINC000152379506
Actelion Java MolfileCreator 2.0

  0  0  0  0  0  0              0 V3000
M  V30 BEGIN CTAB
M  V30 COUNTS 22 24 0 0 0
M  V30 BEGIN ATOM
M  V30 1 Cl 3.3546 -2.6785 0.0 0
M  V30 2 C 2.516 -2.1339 0.0 0
M  V30 3 C 2.5683 -1.1352 0.0 0
M  V30 4 C 1.625 -2.5879 0.0 0
M  V30 5 C 1.7296 -0.5906 0.0 0
M  V30 6 C 0.7863 -2.0432 0.0 0
M  V30 7 C 0.8386 -1.0446 0.0 0
M  V30 8 C 0.0 -0.5 0.0 0
M  V30 9 N 0.866 0.0 0.0 0
M  V30 10 C -0.9135 -0.0932 0.0 0
M  V30 11 C -0.1045 -1.4945 0.0 0
M  V30 12 C 0.866 0.9999 0.0 0
M  V30 13 C -1.5826 -0.8364 0.0 0
M  V30 14 C -1.0826 -1.7024 0.0 0
M  V30 15 O 1.732 1.4999 0.0 0
M  V30 16 C 0.0 1.5 0.0 0 CFG=2
M  V30 17 C -0.866 1.0 0.0 0
M  V30 18 C 0.0 2.5 0.0 0
M  V30 19 C -1.732 1.4999 0.0 0
M  V30 20 C -0.866 2.9999 0.0 0
M  V30 21 O -2.598 1.0 0.0 0
M  V30 22 N -1.732 2.5 0.0 0
M  V30 END ATOM
M  V30 BEGIN BOND
M  V30 1 1 1 2
M  V30 2 2 2 3
M  V30 3 1 2 4
M  V30 4 1 3 5
M  V30 5 2 4 6
M  V30 6 2 5 7
M  V30 7 1 7 8
M  V30 8 1 8 9
M  V30 9 1 8 10
M  V30 10 1 8 11
M  V30 11 1 9 12
M  V30 12 1 10 13
M  V30 13 1 11 14
M  V30 14 2 12 15
M  V30 15 1 16 12 CFG=3
M  V30 16 1 16 17
M  V30 17 1 16 18
M  V30 18 1 17 19
M  V30 19 1 18 20
M  V30 20 2 19 21
M  V30 21 1 19 22
M  V30 22 1 6 7
M  V30 23 1 13 14
M  V30 24 1 20 22
M  V30 END BOND
M  V30 BEGIN COLLECTION
M  V30 MDLV30/STERAC1 ATOMS=(1 16)
M  V30 END COLLECTION
M  V30 END CTAB
M  END
>  <ID>
ZINC000152379506

>  <name>
NA

>  <smiles>
Clc1ccc(cc1)C1(CCCC1)NC(=O)C1CCNC(=O)C1

$$$$
ZINC000546831564
Actelion Java MolfileCreator 2.0

  0  0  0  0  0  0              0 V3000
M  V30 BEGIN CTAB
M  V30 COUNTS 25 28 0 0 0
M  V30 BEGIN ATOM
M  V30 1 Cl -1.8866 2.4052 0.0 0
M  V30 2 C -0.9956 1.9512 0.0 0
M  V30 3 C -0.9433 0.9526 0.0 0
M  V30 4 C -0.157 2.4958 0.0 0
M  V30 5 C -0.0523 0.4986 0.0 0
M  V30 6 C 0.7339 2.0418 0.0 0
M  V30 7 C 0.7863 1.0432 0.0 0
M  V30 8 C 0.0 -0.5 0.0 0
M  V30 9 N 0.866 0.0 0.0 0
M  V30 10 C -0.1045 -1.4945 0.0 0
M  V30 11 C -0.9135 -0.0932 0.0 0
M  V30 12 C 1.732 -0.5 0.0 0
M  V30 13 C -1.0826 -1.7024 0.0 0
M  V30 14 C -1.5826 -0.8364 0.0 0
M  V30 15 O 2.598 0.0 0.0 0
M  V30 16 C 1.732 -1.5 0.0 0
M  V30 17 N 2.598 -1.9999 0.0 0
M  V30 18 C 0.866 -1.9999 0.0 0
M  V30 19 C 2.598 -2.9999 0.0 0
M  V30 20 C 0.866 -3.0 0.0 0
M  V30 21 N 3.3412 -3.6691 0.0 0
M  V30 22 N 1.732 -3.4999 0.0 0
M  V30 23 O 0.0 -3.4999 0.0 0
M  V30 24 C 2.9344 -4.5826 0.0 0
M  V30 25 N 1.9399 -4.4781 0.0 0
M  V30 END ATOM
M  V30 BEGIN BOND
M  V30 1 1 1 2
M  V30 2 2 2 3
M  V30 3 1 2 4
M  V30 4 1 3 5
M  V30 5 2 4 6
M  V30 6 2 5 7
M  V30 7 1 5 8
M  V30 8 1 8 9
M  V30 9 1 8 10
M  V30 10 1 8 11
M  V30 11 1 9 12
M  V30 12 1 10 13
M  V30 13 1 11 14
M  V30 14 2 12 15
M  V30 15 1 12 16
M  V30 16 1 16 17
M  V30 17 2 16 18
M  V30 18 2 17 19
M  V30 19 1 18 20
M  V30 20 1 19 21
M  V30 21 1 19 22
M  V30 22 2 20 23
M  V30 23 2 21 24
M  V30 24 1 22 25
M  V30 25 1 6 7
M  V30 26 1 13 14
M  V30 27 1 20 22
M  V30 28 1 24 25
M  V30 END BOND
M  V30 END CTAB
M  END
>  <ID>
ZINC000546831564

>  <name>
NA

>  <smiles>
Clc1cccc(c1)C1(CCCC1)NC(=O)c1cc(=O)n2[nH]cnc2n1

$$$$
ZINC000368256352
Actelion Java MolfileCreator 2.0

  0  0  0  0  0  0              0 V3000
M  V30 BEGIN CTAB
M  V30 COUNTS 22 25 0 0 0
M  V30 BEGIN ATOM
M  V30 1 F 6.0621 -2.0 0.0 0
M  V30 2 C 5.1961 -1.5 0.0 0
M  V30 3 C 5.1961 -0.5 0.0 0
M  V30 4 C 4.3301 -1.9999 0.0 0
M  V30 5 C 4.3301 0.0 0.0 0
M  V30 6 C 3.4641 -1.4999 0.0 0
M  V30 7 N 4.3301 0.9999 0.0 0
M  V30 8 C 3.4641 -0.4999 0.0 0
M  V30 9 C 3.4641 1.5 0.0 0
M  V30 10 C 2.598 0.0 0.0 0
M  V30 11 O 3.4641 2.5 0.0 0
M  V30 12 C 2.598 0.9999 0.0 0
M  V30 13 C 1.732 -0.5 0.0 0 CFG=2
M  V30 14 O 1.732 -1.5 0.0 0
M  V30 15 N 0.866 0.0 0.0 0
M  V30 16 C 0.0 -0.5 0.0 0
M  V30 17 C -0.9981 -0.4393 0.0 0
M  V30 18 C 0.2507 -1.468 0.0 0
M  V30 19 C -0.9825 0.4662 0.0 0
M  V30 20 C -1.3643 -1.3698 0.0 0
M  V30 21 C -0.5924 -2.0056 0.0 0
M  V30 22 C -1.8257 -0.0713 0.0 0
M  V30 END ATOM
M  V30 BEGIN BOND
M  V30 1 1 1 2
M  V30 2 2 2 3
M  V30 3 1 2 4
M  V30 4 1 3 5
M  V30 5 2 4 6
M  V30 6 1 5 7
M  V30 7 2 5 8
M  V30 8 1 7 9
M  V30 9 1 8 10
M  V30 10 2 9 11
M  V30 11 1 9 12
M  V30 12 1 13 10
M  V30 13 1 13 14 CFG=3
M  V30 14 1 13 15
M  V30 15 1 15 16
M  V30 16 1 16 17
M  V30 17 1 16 18
M  V30 18 1 16 19
M  V30 19 1 17 20
M  V30 20 1 18 21
M  V30 21 1 19 22
M  V30 22 1 6 8
M  V30 23 2 10 12
M  V30 24 1 20 21
M  V30 25 1 20 22
M  V30 END BOND
M  V30 BEGIN COLLECTION
M  V30 MDLV30/STERAC1 ATOMS=(1 13)
M  V30 END COLLECTION
M  V30 END CTAB
M  END
>  <ID>
ZINC000368256352

>  <name>
NA

>  <smiles>
OC(NC12CCC(CC1)C2)c1cc(=O)[nH]c2cc(F)ccc12

$$$$
ZINC001567996916
Actelion Java MolfileCreator 2.0

  0  0  0  0  0  0              0 V3000
M  V30 BEGIN CTAB
M  V30 COUNTS 24 25 0 0 0
M  V30 BEGIN ATOM
M  V30 1 O 3.5385 -7.6947 0.0 0
M  V30 2 C 3.617 -6.1967 0.0 0
M  V30 3 N 4.9535 -5.5157 0.0 0
M  V30 4 C 2.359 -5.3798 0.0 0
M  V30 5 C 5.032 -4.0178 0.0 0
M  V30 6 C 2.4375 -3.8818 0.0 0 CFG=2
M  V30 7 C 3.774 -3.2008 0.0 0
M  V30 8 C 1.1795 -3.0649 0.0 0
M  V30 9 O -0.157 -3.7458 0.0 0
M  V30 10 N 1.258 -1.5669 0.0 0
M  V30 11 C 0.0 -0.75 0.0 0
M  V30 12 C -1.3703 -0.1398 0.0 0
M  V30 13 C -0.1567 -2.2417 0.0 0
M  V30 14 C 1.299 0.0 0.0 0
M  V30 15 C -2.374 -1.2546 0.0 0
M  V30 16 C -1.624 -2.5536 0.0 0
M  V30 17 N 2.598 -0.75 0.0 0
M  V30 18 C 3.8971 0.0 0.0 0
M  V30 19 C 5.1961 -0.75 0.0 0
M  V30 20 C 6.4951 0.0 0.0 0
M  V30 21 C 7.7942 -0.75 0.0 0
M  V30 22 C 9.0932 0.0 0.0 0
M  V30 23 C 10.3923 -0.75 0.0 0
M  V30 24 C 11.6913 0.0 0.0 0
M  V30 END ATOM
M  V30 BEGIN BOND
M  V30 1 2 1 2
M  V30 2 1 2 3
M  V30 3 1 2 4
M  V30 4 1 3 5
M  V30 5 1 6 4
M  V30 6 1 5 7
M  V30 7 1 6 8 CFG=1
M  V30 8 2 8 9
M  V30 9 1 8 10
M  V30 10 1 10 11
M  V30 11 1 11 12
M  V30 12 1 11 13
M  V30 13 1 11 14
M  V30 14 1 12 15
M  V30 15 1 13 16
M  V30 16 1 14 17
M  V30 17 1 17 18
M  V30 18 1 18 19
M  V30 19 1 19 20
M  V30 20 2 20 21 CFG=2
M  V30 21 1 21 22
M  V30 22 1 22 23
M  V30 23 1 23 24
M  V30 24 1 6 7
M  V30 25 1 15 16
M  V30 END BOND
M  V30 BEGIN COLLECTION
M  V30 MDLV30/STERAC1 ATOMS=(1 6)
M  V30 END COLLECTION
M  V30 END CTAB
M  END
>  <ID>
ZINC001567996916

>  <name>
NA

>  <smiles>
CCCC=CCCNCC1(CCCC1)NC(=O)C1CCNC(=O)C1

$$$$
ZINC000680348842
Actelion Java MolfileCreator 2.0

  0  0  0  0  0  0              0 V3000
M  V30 BEGIN CTAB
M  V30 COUNTS 22 24 0 0 0
M  V30 BEGIN ATOM
M  V30 1 S 0.7248 1.1279 0.0 0
M  V30 2 C -0.0523 0.4986 0.0 0
M  V30 3 C 0.3664 2.0615 0.0 0
M  V30 4 N -0.891 1.0432 0.0 0
M  V30 5 C 0.0 -0.5 0.0 0
M  V30 6 C -0.6321 2.0091 0.0 0
M  V30 7 N 0.866 0.0 0.0 0
M  V30 8 C -0.1045 -1.4945 0.0 0
M  V30 9 C -0.9135 -0.0932 0.0 0
M  V30 10 C 1.732 -0.5 0.0 0
M  V30 11 C -1.0826 -1.7024 0.0 0
M  V30 12 C -1.5826 -0.8364 0.0 0
M  V30 13 O 2.598 0.0 0.0 0
M  V30 14 C 1.732 -1.5 0.0 0
M  V30 15 C 0.866 -2.0 0.0 0
M  V30 16 C 2.598 -1.9999 0.0 0
M  V30 17 C 0.866 -3.0 0.0 0
M  V30 18 C 2.598 -2.9999 0.0 0
M  V30 19 O 0.0 -3.5 0.0 0
M  V30 20 N 1.732 -3.5 0.0 0
M  V30 21 C 3.4641 -3.4999 0.0 0
M  V30 22 C 4.3301 -2.9999 0.0 0
M  V30 END ATOM
M  V30 BEGIN BOND
M  V30 1 1 1 2
M  V30 2 1 1 3
M  V30 3 2 2 4
M  V30 4 1 2 5
M  V30 5 2 3 6
M  V30 6 1 5 7
M  V30 7 1 5 8
M  V30 8 1 5 9
M  V30 9 1 7 10
M  V30 10 1 8 11
M  V30 11 1 9 12
M  V30 12 2 10 13
M  V30 13 1 10 14
M  V30 14 1 14 15
M  V30 15 1 14 16
M  V30 16 1 15 17
M  V30 17 1 16 18
M  V30 18 2 17 19
M  V30 19 1 17 20
M  V30 20 1 18 21
M  V30 21 1 21 22
M  V30 22 1 4 6
M  V30 23 1 11 12
M  V30 24 1 18 20
M  V30 END BOND
M  V30 END CTAB
M  END
>  <ID>
ZINC000680348842

>  <name>
NA

>  <smiles>
CCC1CC(CC(=O)N1)C(=O)NC1(CCCC1)c1nccs1

$$$$
ZINC001556591813
Actelion Java MolfileCreator 2.0

  0  0  0  0  0  0              0 V3000
M  V30 BEGIN CTAB
M  V30 COUNTS 25 27 0 0 0
M  V30 BEGIN ATOM
M  V30 1 F 5.1961 2.4999 0.0 0
M  V30 2 C 5.1961 1.4999 0.0 0
M  V30 3 C 4.3301 1.0 0.0 0
M  V30 4 C 6.0621 0.9999 0.0 0
M  V30 5 F 3.4641 1.5 0.0 0
M  V30 6 C 4.3301 0.0 0.0 0
M  V30 7 O 6.9282 1.4999 0.0 0
M  V30 8 C 6.0621 0.0 0.0 0
M  V30 9 N 3.4641 -0.5 0.0 0
M  V30 10 C 5.1961 -0.5 0.0 0
M  V30 11 C 2.598 0.0 0.0 0
M  V30 12 O 2.598 1.0 0.0 0
M  V30 13 C 1.732 -0.5 0.0 0
M  V30 14 O 1.732 -1.5 0.0 0
M  V30 15 C 0.866 0.0 0.0 0
M  V30 16 O 0.866 1.0 0.0 0
M  V30 17 C 0.0 -0.5 0.0 0
M  V30 18 N -0.9135 -0.0932 0.0 0
M  V30 19 N -0.1045 -1.4945 0.0 0
M  V30 20 C -1.5826 -0.8364 0.0 0
M  V30 21 C -1.0826 -1.7024 0.0 0
M  V30 22 C -2.5826 -0.8364 0.0 0
M  V30 23 C -1.5826 -2.5684 0.0 0
M  V30 24 C -3.0826 -1.7024 0.0 0
M  V30 25 C -2.5826 -2.5684 0.0 0
M  V30 END ATOM
M  V30 BEGIN BOND
M  V30 1 1 1 2
M  V30 2 2 2 3
M  V30 3 1 2 4
M  V30 4 1 3 5
M  V30 5 1 3 6
M  V30 6 1 4 7
M  V30 7 2 4 8
M  V30 8 1 6 9
M  V30 9 2 6 10
M  V30 10 1 9 11
M  V30 11 1 11 12
M  V30 12 1 11 13
M  V30 13 2 13 14
M  V30 14 1 13 15
M  V30 15 1 15 16
M  V30 16 1 15 17
M  V30 17 2 17 18
M  V30 18 1 17 19
M  V30 19 1 18 20
M  V30 20 1 19 21
M  V30 21 1 20 22
M  V30 22 1 21 23
M  V30 23 2 22 24
M  V30 24 2 23 25
M  V30 25 1 8 10
M  V30 26 2 20 21
M  V30 27 1 24 25
M  V30 END BOND
M  V30 END CTAB
M  END
>  <ID>
ZINC001556591813

>  <name>
NA

>  <smiles>
OC(Nc1ccc(O)c(F)c1F)C(=O)C(O)c1nc2ccccc2[nH]1

$$$$
ZINC000544493854
Actelion Java MolfileCreator 2.0

  0  0  0  0  0  0              0 V3000
M  V30 BEGIN CTAB
M  V30 COUNTS 24 26 0 0 0
M  V30 BEGIN ATOM
M  V30 1 Br -0.314 5.2417 0.0 0
M  V30 2 C -0.2355 3.7438 0.0 0
M  V30 3 C 1.1009 3.0628 0.0 0
M  V30 4 C -1.4935 2.9268 0.0 0
M  V30 5 C 1.1795 1.5649 0.0 0
M  V30 6 C -1.415 1.4289 0.0 0
M  V30 7 C -0.0785 0.7479 0.0 0
M  V30 8 C 0.0 -0.75 0.0 0
M  V30 9 N 1.299 0.0 0.0 0
M  V30 10 C -0.1567 -2.2417 0.0 0
M  V30 11 C -1.3703 -0.1398 0.0 0
M  V30 12 C 2.598 -0.75 0.0 0
M  V30 13 C -1.624 -2.5536 0.0 0
M  V30 14 C -2.374 -1.2546 0.0 0
M  V30 15 O 3.8971 0.0 0.0 0
M  V30 16 C 2.598 -2.25 0.0 0
M  V30 17 C 1.299 -3.0 0.0 0
M  V30 18 C 3.8971 -2.9999 0.0 0
M  V30 19 C 1.299 -4.5 0.0 0
M  V30 20 C 3.8971 -4.4999 0.0 0
M  V30 21 O 0.0 -5.25 0.0 0
M  V30 22 N 2.598 -5.25 0.0 0
M  V30 23 C 5.1961 -5.2499 0.0 0
M  V30 24 C 6.4951 -4.4999 0.0 0
M  V30 END ATOM
M  V30 BEGIN BOND
M  V30 1 1 1 2
M  V30 2 2 2 3
M  V30 3 1 2 4
M  V30 4 1 3 5
M  V30 5 2 4 6
M  V30 6 2 5 7
M  V30 7 1 7 8
M  V30 8 1 8 9
M  V30 9 1 8 10
M  V30 10 1 8 11
M  V30 11 1 9 12
M  V30 12 1 10 13
M  V30 13 1 11 14
M  V30 14 2 12 15
M  V30 15 1 12 16
M  V30 16 1 16 17
M  V30 17 1 16 18
M  V30 18 1 17 19
M  V30 19 1 18 20
M  V30 20 2 19 21
M  V30 21 1 19 22
M  V30 22 1 20 23
M  V30 23 1 23 24
M  V30 24 1 6 7
M  V30 25 1 13 14
M  V30 26 1 20 22
M  V30 END BOND
M  V30 END CTAB
M  END
>  <ID>
ZINC000544493854

>  <name>
NA

>  <smiles>
CCC1CC(CC(=O)N1)C(=O)NC1(CCCC1)c1ccc(Br)cc1

$$$$
ZINC000268867207
Actelion Java MolfileCreator 2.0

  0  0  0  0  0  0              0 V3000
M  V30 BEGIN CTAB
M  V30 COUNTS 24 27 0 0 0
M  V30 BEGIN ATOM
M  V30 1 O 4.9535 -2.6159 0.0 0
M  V30 2 C 4.5467 -1.7024 0.0 0
M  V30 3 O 5.0467 -0.8364 0.0 0
M  V30 4 C 3.5686 -1.4945 0.0 0
M  V30 5 C 4.3776 -0.0932 0.0 0
M  V30 6 C 3.4641 -0.5 0.0 0 CFG=1
M  V30 7 C 2.598 0.0 0.0 0
M  V30 8 C 1.732 -0.5 0.0 0
M  V30 9 O 1.732 -1.5 0.0 0
M  V30 10 N 0.866 0.0 0.0 0
M  V30 11 C 0.0 -0.5 0.0 0
M  V30 12 N -0.9135 -0.0932 0.0 0
M  V30 13 C -0.1045 -1.4945 0.0 0
M  V30 14 N -1.5826 -0.8364 0.0 0
M  V30 15 C -1.1214 0.8848 0.0 0
M  V30 16 C -1.0826 -1.7024 0.0 0
M  V30 17 C -0.3783 1.554 0.0 0
M  V30 18 C -2.0725 1.1939 0.0 0
M  V30 19 C -1.4894 -2.6159 0.0 0
M  V30 20 C -0.5862 2.5321 0.0 0
M  V30 21 C -2.2804 2.172 0.0 0
M  V30 22 C -2.2984 -3.2037 0.0 0
M  V30 23 C -1.3848 -3.6105 0.0 0
M  V30 24 C -1.5372 2.8411 0.0 0
M  V30 END ATOM
M  V30 BEGIN BOND
M  V30 1 2 1 2
M  V30 2 1 2 3
M  V30 3 1 2 4
M  V30 4 1 3 5
M  V30 5 1 6 4
M  V30 6 1 6 7 CFG=3
M  V30 7 1 7 8
M  V30 8 2 8 9
M  V30 9 1 8 10
M  V30 10 2 10 11 CFG=2
M  V30 11 1 11 12
M  V30 12 1 11 13
M  V30 13 1 12 14
M  V30 14 1 12 15
M  V30 15 2 13 16
M  V30 16 2 15 17
M  V30 17 1 15 18
M  V30 18 1 16 19
M  V30 19 1 17 20
M  V30 20 2 18 21
M  V30 21 1 19 22
M  V30 22 1 19 23
M  V30 23 2 20 24
M  V30 24 1 5 6
M  V30 25 1 14 16
M  V30 26 1 21 24
M  V30 27 1 22 23
M  V30 END BOND
M  V30 BEGIN COLLECTION
M  V30 MDLV30/STERAC1 ATOMS=(1 6)
M  V30 END COLLECTION
M  V30 END CTAB
M  END
>  <ID>
ZINC000268867207

>  <name>
NA

>  <smiles>
O=C(CC1COC(=O)C1)N=c1cc([nH]n1-c1ccccc1)C1CC1

$$$$
ZINC000408165242
Actelion Java MolfileCreator 2.0

  0  0  0  0  0  0              0 V3000
M  V30 BEGIN CTAB
M  V30 COUNTS 22 24 0 0 0
M  V30 BEGIN ATOM
M  V30 1 S -0.891 1.0432 0.0 0
M  V30 2 C -0.0523 0.4986 0.0 0
M  V30 3 C -0.6321 2.0091 0.0 0
M  V30 4 N 0.7248 1.1279 0.0 0
M  V30 5 C 0.0 -0.5 0.0 0
M  V30 6 C 0.3664 2.0615 0.0 0
M  V30 7 N 0.866 0.0 0.0 0
M  V30 8 C -0.1045 -1.4945 0.0 0
M  V30 9 C -0.9135 -0.0932 0.0 0
M  V30 10 C 0.911 2.9002 0.0 0
M  V30 11 C 1.732 -0.5 0.0 0
M  V30 12 C -1.0826 -1.7024 0.0 0
M  V30 13 C -1.5826 -0.8364 0.0 0
M  V30 14 O 2.598 0.0 0.0 0
M  V30 15 C 1.732 -1.5 0.0 0
M  V30 16 C 0.866 -1.9999 0.0 0
M  V30 17 C 2.598 -2.0 0.0 0
M  V30 18 C 0.866 -2.9999 0.0 0
M  V30 19 C 2.598 -3.0 0.0 0
M  V30 20 O 0.0 -3.4999 0.0 0
M  V30 21 N 1.732 -3.5 0.0 0
M  V30 22 C 3.4641 -3.5 0.0 0
M  V30 END ATOM
M  V30 BEGIN BOND
M  V30 1 1 1 2
M  V30 2 1 1 3
M  V30 3 2 2 4
M  V30 4 1 2 5
M  V30 5 2 3 6
M  V30 6 1 5 7
M  V30 7 1 5 8
M  V30 8 1 5 9
M  V30 9 1 6 10
M  V30 10 1 7 11
M  V30 11 1 8 12
M  V30 12 1 9 13
M  V30 13 2 11 14
M  V30 14 1 11 15
M  V30 15 1 15 16
M  V30 16 1 15 17
M  V30 17 1 16 18
M  V30 18 1 17 19
M  V30 19 2 18 20
M  V30 20 1 18 21
M  V30 21 1 19 22
M  V30 22 1 4 6
M  V30 23 1 12 13
M  V30 24 1 19 21
M  V30 END BOND
M  V30 END CTAB
M  END
>  <ID>
ZINC000408165242

>  <name>
NA

>  <smiles>
CC1CC(CC(=O)N1)C(=O)NC1(CCCC1)c1nc(C)cs1

$$$$
ZINC000494270542
Actelion Java MolfileCreator 2.0

  0  0  0  0  0  0              0 V3000
M  V30 BEGIN CTAB
M  V30 COUNTS 24 25 0 0 0
M  V30 BEGIN ATOM
M  V30 1 F 10.3923 -0.75 0.0 0
M  V30 2 C 9.0932 0.0 0.0 0
M  V30 3 F 9.0932 1.4999 0.0 0
M  V30 4 C 7.7942 -0.75 0.0 0 CFG=1
M  V30 5 O 7.7942 -2.25 0.0 0
M  V30 6 C 6.4951 0.0 0.0 0
M  V30 7 N 5.1961 -0.75 0.0 0
M  V30 8 C 3.8971 0.0 0.0 0
M  V30 9 O 3.8971 1.5 0.0 0
M  V30 10 C 2.598 -0.75 0.0 0
M  V30 11 O 2.598 -2.25 0.0 0
M  V30 12 N 1.299 0.0 0.0 0
M  V30 13 C 0.0 -0.75 0.0 0
M  V30 14 C -1.299 0.0 0.0 0
M  V30 15 C 0.0 -2.2499 0.0 0
M  V30 16 C -2.598 -0.7499 0.0 0
M  V30 17 C -1.299 -2.9999 0.0 0
M  V30 18 N -4.0246 -0.2864 0.0 0
M  V30 19 C -2.598 -2.2499 0.0 0
M  V30 20 C -4.9063 -1.4999 0.0 0
M  V30 21 C -4.4881 1.1401 0.0 0
M  V30 22 N -4.0246 -2.7135 0.0 0
M  V30 23 O -6.4063 -1.4999 0.0 0
M  V30 24 C -4.4881 -4.1401 0.0 0
M  V30 END ATOM
M  V30 BEGIN BOND
M  V30 1 1 1 2
M  V30 2 1 2 3
M  V30 3 1 4 2
M  V30 4 1 4 5 CFG=1
M  V30 5 1 4 6
M  V30 6 1 6 7
M  V30 7 1 7 8
M  V30 8 2 8 9
M  V30 9 1 8 10
M  V30 10 2 10 11
M  V30 11 1 10 12
M  V30 12 1 12 13
M  V30 13 2 13 14
M  V30 14 1 13 15
M  V30 15 1 14 16
M  V30 16 2 15 17
M  V30 17 1 16 18
M  V30 18 2 16 19
M  V30 19 1 18 20
M  V30 20 1 18 21
M  V30 21 1 19 22
M  V30 22 2 20 23
M  V30 23 1 22 24
M  V30 24 1 17 19
M  V30 25 1 20 22
M  V30 END BOND
M  V30 BEGIN COLLECTION
M  V30 MDLV30/STERAC1 ATOMS=(1 4)
M  V30 END COLLECTION
M  V30 END CTAB
M  END
>  <ID>
ZINC000494270542

>  <name>
NA

>  <smiles>
Cn1c2ccc(NC(=O)C(=O)NCC(O)C(F)F)cc2n(C)c1=O

$$$$
ZINC001506515964
Actelion Java MolfileCreator 2.0

  0  0  0  0  0  0              0 V3000
M  V30 BEGIN CTAB
M  V30 COUNTS 25 27 0 0 0
M  V30 BEGIN ATOM
M  V30 1 F 4.3301 0.0 0.0 0
M  V30 2 C 3.4641 -0.5 0.0 0
M  V30 3 C 2.598 0.0 0.0 0
M  V30 4 N 1.732 -0.5 0.0 0
M  V30 5 C 0.866 0.0 0.0 0
M  V30 6 C 0.0 -0.5 0.0 0
M  V30 7 N 0.866 -1.0 0.0 0
M  V30 8 C -0.866 0.0 0.0 0
M  V30 9 C 0.0 -1.4999 0.0 0
M  V30 10 C 0.866 -2.0 0.0 0 CFG=1
M  V30 11 C -1.732 -0.4999 0.0 0
M  V30 12 C -0.866 -1.9999 0.0 0
M  V30 13 O 0.0 -2.5 0.0 0
M  V30 14 C 1.732 -2.5 0.0 0
M  V30 15 C -1.732 -1.4999 0.0 0
M  V30 16 C 1.732 -3.5 0.0 0
M  V30 17 C 2.598 -2.0 0.0 0
M  V30 18 C 2.598 -4.0 0.0 0
M  V30 19 C 0.866 -4.0 0.0 0
M  V30 20 C 3.4641 -2.5 0.0 0
M  V30 21 N 3.4641 -3.5 0.0 0
M  V30 22 C 2.598 -5.0 0.0 0
M  V30 23 C 0.866 -5.0 0.0 0
M  V30 24 O 4.3301 -2.0 0.0 0
M  V30 25 C 1.732 -5.5 0.0 0
M  V30 END ATOM
M  V30 BEGIN BOND
M  V30 1 1 1 2
M  V30 2 1 2 3
M  V30 3 1 3 4
M  V30 4 1 4 5
M  V30 5 1 5 6
M  V30 6 1 6 7
M  V30 7 1 6 8
M  V30 8 1 6 9
M  V30 9 1 10 7
M  V30 10 1 8 11
M  V30 11 1 9 12
M  V30 12 1 10 13 CFG=3
M  V30 13 1 10 14
M  V30 14 1 11 15
M  V30 15 1 14 16
M  V30 16 2 14 17
M  V30 17 2 16 18
M  V30 18 1 16 19
M  V30 19 1 17 20
M  V30 20 1 18 21
M  V30 21 1 18 22
M  V30 22 2 19 23
M  V30 23 2 20 24
M  V30 24 2 22 25
M  V30 25 1 12 15
M  V30 26 1 20 21
M  V30 27 1 23 25
M  V30 END BOND
M  V30 BEGIN COLLECTION
M  V30 MDLV30/STERAC1 ATOMS=(1 10)
M  V30 END COLLECTION
M  V30 END CTAB
M  END
>  <ID>
ZINC001506515964

>  <name>
NA

>  <smiles>
OC(NC1(CNCCF)CCCCC1)c1cc(=O)[nH]c2ccccc12

$$$$
ZINC001698634277
Actelion Java MolfileCreator 2.0

  0  0  0  0  0  0              0 V3000
M  V30 BEGIN CTAB
M  V30 COUNTS 23 25 0 0 0
M  V30 BEGIN ATOM
M  V30 1 O 2.359 -5.1298 0.0 0
M  V30 2 C 2.4113 -4.1311 0.0 0
M  V30 3 N 3.3023 -3.6771 0.0 0
M  V30 4 C 1.5726 -3.5865 0.0 0
M  V30 5 C 3.3546 -2.6785 0.0 0
M  V30 6 C 1.625 -2.5879 0.0 0
M  V30 7 O 4.2456 -2.2245 0.0 0
M  V30 8 C 2.516 -2.1339 0.0 0
M  V30 9 C 0.7863 -2.0432 0.0 0 CFG=2
M  V30 10 O -0.1046 -2.4972 0.0 0
M  V30 11 N 0.8386 -1.0446 0.0 0
M  V30 12 C 0.0 -0.5 0.0 0
M  V30 13 C -0.9135 -0.0932 0.0 0
M  V30 14 C -0.1045 -1.4945 0.0 0
M  V30 15 C 0.866 0.0 0.0 0
M  V30 16 C -1.5826 -0.8364 0.0 0
M  V30 17 C -1.0826 -1.7024 0.0 0
M  V30 18 N 1.732 -0.5 0.0 0
M  V30 19 C 2.598 0.0 0.0 0
M  V30 20 C 3.4641 -0.5 0.0 0
M  V30 21 C 3.7229 -1.4659 0.0 0
M  V30 22 C 4.43 -0.2411 0.0 0
M  V30 23 C 4.6888 -1.2071 0.0 0
M  V30 END ATOM
M  V30 BEGIN BOND
M  V30 1 2 1 2
M  V30 2 1 2 3
M  V30 3 1 2 4
M  V30 4 1 3 5
M  V30 5 2 4 6
M  V30 6 1 5 7
M  V30 7 2 5 8
M  V30 8 1 9 6
M  V30 9 1 9 10 CFG=3
M  V30 10 1 9 11
M  V30 11 1 11 12
M  V30 12 1 12 13
M  V30 13 1 12 14
M  V30 14 1 12 15
M  V30 15 1 13 16
M  V30 16 1 14 17
M  V30 17 1 15 18
M  V30 18 1 18 19
M  V30 19 1 19 20
M  V30 20 1 20 21
M  V30 21 1 20 22
M  V30 22 1 21 23
M  V30 23 1 6 8
M  V30 24 1 16 17
M  V30 25 1 22 23
M  V30 END BOND
M  V30 BEGIN COLLECTION
M  V30 MDLV30/STERAC1 ATOMS=(1 9)
M  V30 END COLLECTION
M  V30 END CTAB
M  END
>  <ID>
ZINC001698634277

>  <name>
NA

>  <smiles>
OC(NC1(CNCC2CCC2)CCCC1)c1cc(O)[nH]c(=O)c1

$$$$
ZINC001100663034
Actelion Java MolfileCreator 2.0

  0  0  0  0  0  0              0 V3000
M  V30 BEGIN CTAB
M  V30 COUNTS 24 25 0 0 0
M  V30 BEGIN ATOM
M  V30 1 F 6.0706 -6.4504 0.0 0
M  V30 2 C 7.0651 -6.5549 0.0 0
M  V30 3 F 7.4718 -7.4685 0.0 0
M  V30 4 C 7.6529 -5.7459 0.0 0
M  V30 5 N 8.6529 -5.7459 0.0 0
M  V30 6 C 7.3439 -4.7948 0.0 0
M  V30 7 N 8.9619 -4.7948 0.0 0
M  V30 8 C 8.1529 -4.2071 0.0 0
M  V30 9 C 8.1529 -3.2071 0.0 0
M  V30 10 O 9.0189 -2.7071 0.0 0
M  V30 11 N 7.2869 -2.7071 0.0 0
M  V30 12 C 7.2869 -1.7071 0.0 0
M  V30 13 C 6.4208 -1.2071 0.0 0
M  V30 14 C 6.162 -0.2411 0.0 0
M  V30 15 C 5.4549 -1.4659 0.0 0
M  V30 16 C 5.1961 -0.5 0.0 0
M  V30 17 N 4.3301 0.0 0.0 0
M  V30 18 C 3.4641 -0.5 0.0 0
M  V30 19 C 2.598 0.0 0.0 0
M  V30 20 O 2.598 1.0 0.0 0
M  V30 21 N 1.732 -0.5 0.0 0
M  V30 22 C 0.866 0.0 0.0 0
M  V30 23 O 0.866 1.0 0.0 0
M  V30 24 N 0.0 -0.5 0.0 0
M  V30 END ATOM
M  V30 BEGIN BOND
M  V30 1 1 1 2
M  V30 2 1 2 3
M  V30 3 1 2 4
M  V30 4 1 4 5
M  V30 5 2 4 6
M  V30 6 1 5 7
M  V30 7 1 6 8
M  V30 8 1 8 9
M  V30 9 2 9 10
M  V30 10 1 9 11
M  V30 11 1 11 12
M  V30 12 1 12 13
M  V30 13 1 13 14
M  V30 14 1 13 15
M  V30 15 1 14 16
M  V30 16 1 16 17
M  V30 17 1 17 18
M  V30 18 1 18 19
M  V30 19 2 19 20
M  V30 20 1 19 21
M  V30 21 1 21 22
M  V30 22 2 22 23
M  V30 23 1 22 24
M  V30 24 2 7 8
M  V30 25 1 15 16
M  V30 END BOND
M  V30 END CTAB
M  END
>  <ID>
ZINC001100663034

>  <name>
NA

>  <smiles>
NC(=O)NC(=O)CNC1CC(CNC(=O)c2cc([nH]n2)C(F)F)C1

$$$$
ZINC000568195359
Actelion Java MolfileCreator 2.0

  0  0  0  0  0  0              0 V3000
M  V30 BEGIN CTAB
M  V30 COUNTS 25 28 0 0 0
M  V30 BEGIN ATOM
M  V30 1 Cl -1.8866 2.4052 0.0 0
M  V30 2 C -0.9956 1.9512 0.0 0
M  V30 3 C -0.9433 0.9526 0.0 0
M  V30 4 C -0.157 2.4958 0.0 0
M  V30 5 C -0.0523 0.4986 0.0 0
M  V30 6 C 0.7339 2.0418 0.0 0
M  V30 7 C 0.7863 1.0432 0.0 0
M  V30 8 C 0.0 -0.5 0.0 0
M  V30 9 N 0.866 0.0 0.0 0
M  V30 10 C -0.1045 -1.4945 0.0 0
M  V30 11 C -0.9135 -0.0932 0.0 0
M  V30 12 C 1.732 -0.5 0.0 0
M  V30 13 C -1.0826 -1.7024 0.0 0
M  V30 14 C -1.5826 -0.8364 0.0 0
M  V30 15 O 2.598 0.0 0.0 0
M  V30 16 C 1.732 -1.5 0.0 0
M  V30 17 N 2.598 -1.9999 0.0 0
M  V30 18 C 0.866 -2.0 0.0 0
M  V30 19 C 2.598 -2.9999 0.0 0
M  V30 20 C 0.866 -3.0 0.0 0
M  V30 21 N 1.732 -3.5 0.0 0
M  V30 22 C 3.4641 -3.4999 0.0 0
M  V30 23 O 0.0 -3.5 0.0 0
M  V30 24 C 4.4641 -3.4999 0.0 0
M  V30 25 C 3.9641 -4.366 0.0 0
M  V30 END ATOM
M  V30 BEGIN BOND
M  V30 1 1 1 2
M  V30 2 2 2 3
M  V30 3 1 2 4
M  V30 4 1 3 5
M  V30 5 2 4 6
M  V30 6 2 5 7
M  V30 7 1 5 8
M  V30 8 1 8 9
M  V30 9 1 8 10
M  V30 10 1 8 11
M  V30 11 1 9 12
M  V30 12 1 10 13
M  V30 13 1 11 14
M  V30 14 2 12 15
M  V30 15 1 12 16
M  V30 16 1 16 17
M  V30 17 2 16 18
M  V30 18 2 17 19
M  V30 19 1 18 20
M  V30 20 1 19 21
M  V30 21 1 19 22
M  V30 22 2 20 23
M  V30 23 1 22 24
M  V30 24 1 22 25
M  V30 25 1 6 7
M  V30 26 1 13 14
M  V30 27 1 20 21
M  V30 28 1 24 25
M  V30 END BOND
M  V30 END CTAB
M  END
>  <ID>
ZINC000568195359

>  <name>
NA

>  <smiles>
Clc1cccc(c1)C1(CCCC1)NC(=O)c1cc(=O)[nH]c(n1)C1CC1

$$$$
ZINC000121119926
Actelion Java MolfileCreator 2.0

  0  0  0  0  0  0              0 V3000
M  V30 BEGIN CTAB
M  V30 COUNTS 25 28 0 0 0
M  V30 BEGIN ATOM
M  V30 1 O 4.9535 -2.6159 0.0 0
M  V30 2 C 4.5467 -1.7024 0.0 0
M  V30 3 O 5.0467 -0.8364 0.0 0
M  V30 4 C 3.5686 -1.4945 0.0 0
M  V30 5 C 4.3776 -0.0932 0.0 0
M  V30 6 C 3.4641 -0.5 0.0 0 CFG=1
M  V30 7 C 2.598 0.0 0.0 0
M  V30 8 C 1.732 -0.5 0.0 0
M  V30 9 O 1.732 -1.5 0.0 0
M  V30 10 N 0.866 0.0 0.0 0
M  V30 11 C 0.0 -0.5 0.0 0
M  V30 12 N -0.9135 -0.0932 0.0 0
M  V30 13 C -0.1045 -1.4945 0.0 0
M  V30 14 N -1.5826 -0.8364 0.0 0
M  V30 15 C -1.1214 0.8848 0.0 0
M  V30 16 C -1.0826 -1.7024 0.0 0
M  V30 17 C -0.3783 1.554 0.0 0
M  V30 18 C -2.0725 1.1939 0.0 0
M  V30 19 C -1.4894 -2.6159 0.0 0
M  V30 20 C -0.5862 2.5321 0.0 0
M  V30 21 C -2.2804 2.172 0.0 0
M  V30 22 C -2.4229 -2.9743 0.0 0
M  V30 23 C -1.131 -3.5495 0.0 0
M  V30 24 C -1.5372 2.8411 0.0 0
M  V30 25 C -2.0646 -3.9079 0.0 0
M  V30 END ATOM
M  V30 BEGIN BOND
M  V30 1 2 1 2
M  V30 2 1 2 3
M  V30 3 1 2 4
M  V30 4 1 3 5
M  V30 5 1 6 4
M  V30 6 1 6 7 CFG=3
M  V30 7 1 7 8
M  V30 8 2 8 9
M  V30 9 1 8 10
M  V30 10 2 10 11 CFG=2
M  V30 11 1 11 12
M  V30 12 1 11 13
M  V30 13 1 12 14
M  V30 14 1 12 15
M  V30 15 2 13 16
M  V30 16 2 15 17
M  V30 17 1 15 18
M  V30 18 1 16 19
M  V30 19 1 17 20
M  V30 20 2 18 21
M  V30 21 1 19 22
M  V30 22 1 19 23
M  V30 23 2 20 24
M  V30 24 1 22 25
M  V30 25 1 5 6
M  V30 26 1 14 16
M  V30 27 1 21 24
M  V30 28 1 23 25
M  V30 END BOND
M  V30 BEGIN COLLECTION
M  V30 MDLV30/STERAC1 ATOMS=(1 6)
M  V30 END COLLECTION
M  V30 END CTAB
M  END
>  <ID>
ZINC000121119926

>  <name>
NA

>  <smiles>
O=C(CC1COC(=O)C1)N=c1cc([nH]n1-c1ccccc1)C1CCC1

$$$$
ZINC000578468547
Actelion Java MolfileCreator 2.0

  0  0  0  0  0  0              0 V3000
M  V30 BEGIN CTAB
M  V30 COUNTS 24 26 0 0 0
M  V30 BEGIN ATOM
M  V30 1 F -0.314 5.2417 0.0 0
M  V30 2 C -0.2355 3.7438 0.0 0
M  V30 3 C 1.1009 3.0628 0.0 0
M  V30 4 C -1.4935 2.9268 0.0 0
M  V30 5 C 1.1795 1.5649 0.0 0
M  V30 6 C -1.415 1.4289 0.0 0
M  V30 7 C -0.0785 0.7479 0.0 0
M  V30 8 C 0.0 -0.75 0.0 0
M  V30 9 N 1.299 0.0 0.0 0
M  V30 10 C -0.1567 -2.2417 0.0 0
M  V30 11 C -1.3703 -0.1398 0.0 0
M  V30 12 C 2.598 -0.75 0.0 0
M  V30 13 C -1.624 -2.5536 0.0 0
M  V30 14 C -2.374 -1.2546 0.0 0
M  V30 15 O 3.8971 0.0 0.0 0
M  V30 16 C 2.598 -2.25 0.0 0
M  V30 17 C 1.299 -3.0 0.0 0
M  V30 18 C 3.8971 -2.9999 0.0 0
M  V30 19 C 1.299 -4.5 0.0 0
M  V30 20 C 3.8971 -4.4999 0.0 0
M  V30 21 O 0.0 -5.25 0.0 0
M  V30 22 N 2.598 -5.25 0.0 0
M  V30 23 C 5.1961 -5.2499 0.0 0
M  V30 24 C 6.4951 -4.4999 0.0 0
M  V30 END ATOM
M  V30 BEGIN BOND
M  V30 1 1 1 2
M  V30 2 2 2 3
M  V30 3 1 2 4
M  V30 4 1 3 5
M  V30 5 2 4 6
M  V30 6 2 5 7
M  V30 7 1 7 8
M  V30 8 1 8 9
M  V30 9 1 8 10
M  V30 10 1 8 11
M  V30 11 1 9 12
M  V30 12 1 10 13
M  V30 13 1 11 14
M  V30 14 2 12 15
M  V30 15 1 12 16
M  V30 16 1 16 17
M  V30 17 1 16 18
M  V30 18 1 17 19
M  V30 19 1 18 20
M  V30 20 2 19 21
M  V30 21 1 19 22
M  V30 22 1 20 23
M  V30 23 1 23 24
M  V30 24 1 6 7
M  V30 25 1 13 14
M  V30 26 1 20 22
M  V30 END BOND
M  V30 END CTAB
M  END
>  <ID>
ZINC000578468547

>  <name>
NA

>  <smiles>
CCC1CC(CC(=O)N1)C(=O)NC1(CCCC1)c1ccc(F)cc1

$$$$
ZINC000680350343
Actelion Java MolfileCreator 2.0

  0  0  0  0  0  0              0 V3000
M  V30 BEGIN CTAB
M  V30 COUNTS 24 26 0 0 0
M  V30 BEGIN ATOM
M  V30 1 F 2.38 1.0762 0.0 0
M  V30 2 C 0.9942 1.6503 0.0 0
M  V30 3 C -0.1957 0.7371 0.0 0
M  V30 4 C 0.7984 3.1374 0.0 0
M  V30 5 C -1.5816 1.3111 0.0 0
M  V30 6 C 0.0 -0.75 0.0 0
M  V30 7 C -0.5873 3.7115 0.0 0
M  V30 8 C -1.7773 2.7983 0.0 0
M  V30 9 N 1.299 0.0 0.0 0
M  V30 10 C -0.3882 -2.1988 0.0 0
M  V30 11 C -1.4488 -0.3617 0.0 0
M  V30 12 F -0.7831 5.1986 0.0 0
M  V30 13 C 2.598 -0.75 0.0 0
M  V30 14 C -1.8371 -1.8106 0.0 0
M  V30 15 O 3.8971 0.0 0.0 0
M  V30 16 C 2.598 -2.25 0.0 0
M  V30 17 C 1.299 -3.0 0.0 0
M  V30 18 C 3.8971 -2.9999 0.0 0
M  V30 19 C 1.299 -4.5 0.0 0
M  V30 20 C 3.8971 -4.4999 0.0 0
M  V30 21 O 0.0 -5.25 0.0 0
M  V30 22 N 2.598 -5.25 0.0 0
M  V30 23 C 5.1961 -5.2499 0.0 0
M  V30 24 C 6.4951 -4.4999 0.0 0
M  V30 END ATOM
M  V30 BEGIN BOND
M  V30 1 1 1 2
M  V30 2 2 2 3
M  V30 3 1 2 4
M  V30 4 1 3 5
M  V30 5 1 3 6
M  V30 6 2 4 7
M  V30 7 2 5 8
M  V30 8 1 6 9
M  V30 9 1 6 10
M  V30 10 1 6 11
M  V30 11 1 7 12
M  V30 12 1 9 13
M  V30 13 1 10 14
M  V30 14 2 13 15
M  V30 15 1 13 16
M  V30 16 1 16 17
M  V30 17 1 16 18
M  V30 18 1 17 19
M  V30 19 1 18 20
M  V30 20 2 19 21
M  V30 21 1 19 22
M  V30 22 1 20 23
M  V30 23 1 23 24
M  V30 24 1 7 8
M  V30 25 1 11 14
M  V30 26 1 20 22
M  V30 END BOND
M  V30 END CTAB
M  END
>  <ID>
ZINC000680350343

>  <name>
NA

>  <smiles>
CCC1CC(CC(=O)N1)C(=O)NC1(CCC1)c1ccc(F)cc1F

$$$$
ZINC001176128195
Actelion Java MolfileCreator 2.0

  0  0  0  0  0  0              0 V3000
M  V30 BEGIN CTAB
M  V30 COUNTS 25 26 0 0 0
M  V30 BEGIN ATOM
M  V30 1 O 11.2583 0.0 0.0 0
M  V30 2 C 10.3923 -0.5 0.0 0
M  V30 3 N 9.5262 0.0 0.0 0
M  V30 4 N 10.3923 -1.5 0.0 0
M  V30 5 C 8.6602 -0.5 0.0 0
M  V30 6 O 8.6602 -1.4999 0.0 0
M  V30 7 C 7.7942 0.0 0.0 0
M  V30 8 N 6.9282 -0.5 0.0 0
M  V30 9 C 6.0621 0.0 0.0 0
M  V30 10 C 5.1961 -0.5 0.0 0
M  V30 11 C 4.3301 0.0 0.0 0
M  V30 12 C 3.4641 -0.5 0.0 0
M  V30 13 C 2.598 0.0 0.0 0 CFG=1
M  V30 14 N 1.732 -0.5 0.0 0
M  V30 15 C 2.598 1.0 0.0 0
M  V30 16 C 0.866 0.0 0.0 0
M  V30 17 O 0.866 1.0 0.0 0
M  V30 18 C 0.0 -0.5 0.0 0
M  V30 19 N -0.9135 -0.0932 0.0 0
M  V30 20 C -0.1045 -1.4945 0.0 0
M  V30 21 C -1.5826 -0.8364 0.0 0
M  V30 22 C -1.0826 -1.7024 0.0 0
M  V30 23 C -2.5608 -1.0443 0.0 0
M  V30 24 C -1.7518 -2.4455 0.0 0
M  V30 25 C -2.6653 -2.0388 0.0 0
M  V30 END ATOM
M  V30 BEGIN BOND
M  V30 1 2 1 2
M  V30 2 1 2 3
M  V30 3 1 2 4
M  V30 4 1 3 5
M  V30 5 2 5 6
M  V30 6 1 5 7
M  V30 7 1 7 8
M  V30 8 1 8 9
M  V30 9 1 9 10
M  V30 10 1 10 11
M  V30 11 1 11 12
M  V30 12 1 13 12
M  V30 13 1 13 14 CFG=1
M  V30 14 1 13 15
M  V30 15 1 14 16
M  V30 16 2 16 17
M  V30 17 1 16 18
M  V30 18 1 18 19
M  V30 19 2 18 20
M  V30 20 1 19 21
M  V30 21 1 20 22
M  V30 22 1 21 23
M  V30 23 1 22 24
M  V30 24 1 23 25
M  V30 25 2 21 22
M  V30 26 1 24 25
M  V30 END BOND
M  V30 BEGIN COLLECTION
M  V30 MDLV30/STERAC1 ATOMS=(1 13)
M  V30 END COLLECTION
M  V30 END CTAB
M  END
>  <ID>
ZINC001176128195

>  <name>
NA

>  <smiles>
CC(CCCCNCC(=O)NC(N)=O)NC(=O)c1cc2CCCc2[nH]1

$$$$
ZINC001421507511
Actelion Java MolfileCreator 2.0

  0  0  0  0  0  0              0 V3000
M  V30 BEGIN CTAB
M  V30 COUNTS 23 25 0 0 0
M  V30 BEGIN ATOM
M  V30 1 S 4.5467 -1.7024 0.0 0
M  V30 2 C 5.0467 -0.8364 0.0 0
M  V30 3 C 3.5686 -1.4945 0.0 0
M  V30 4 N 4.3776 -0.0932 0.0 0
M  V30 5 C 3.4641 -0.5 0.0 0
M  V30 6 C 2.598 0.0 0.0 0
M  V30 7 N 1.732 -0.5 0.0 0
M  V30 8 C 0.866 0.0 0.0 0
M  V30 9 C 0.0 -0.5 0.0 0
M  V30 10 N 0.8386 -1.0446 0.0 0
M  V30 11 C -0.9135 -0.0932 0.0 0
M  V30 12 C -0.1045 -1.4945 0.0 0
M  V30 13 C 0.7863 -2.0432 0.0 0
M  V30 14 C -1.5826 -0.8364 0.0 0
M  V30 15 C -1.0826 -1.7024 0.0 0
M  V30 16 O -0.1046 -2.4972 0.0 0
M  V30 17 C 1.625 -2.5879 0.0 0 CFG=2
M  V30 18 C 1.5726 -3.5865 0.0 0
M  V30 19 C 2.516 -2.1339 0.0 0
M  V30 20 C 2.4113 -4.1311 0.0 0
M  V30 21 C 3.3546 -2.6785 0.0 0
M  V30 22 O 2.359 -5.1298 0.0 0
M  V30 23 N 3.3023 -3.6771 0.0 0
M  V30 END ATOM
M  V30 BEGIN BOND
M  V30 1 1 1 2
M  V30 2 1 1 3
M  V30 3 2 2 4
M  V30 4 2 3 5
M  V30 5 1 5 6
M  V30 6 1 6 7
M  V30 7 1 7 8
M  V30 8 1 8 9
M  V30 9 1 9 10
M  V30 10 1 9 11
M  V30 11 1 9 12
M  V30 12 1 10 13
M  V30 13 1 11 14
M  V30 14 1 12 15
M  V30 15 2 13 16
M  V30 16 1 17 13 CFG=1
M  V30 17 1 17 18
M  V30 18 1 17 19
M  V30 19 1 18 20
M  V30 20 1 19 21
M  V30 21 2 20 22
M  V30 22 1 20 23
M  V30 23 1 4 5
M  V30 24 1 14 15
M  V30 25 1 21 23
M  V30 END BOND
M  V30 BEGIN COLLECTION
M  V30 MDLV30/STERAC1 ATOMS=(1 17)
M  V30 END COLLECTION
M  V30 END CTAB
M  END
>  <ID>
ZINC001421507511

>  <name>
NA

>  <smiles>
O=C(NC1(CNCc2cscn2)CCCC1)C1CCNC(=O)C1

$$$$
ZINC001062798137
Actelion Java MolfileCreator 2.0

  0  0  0  0  0  0              0 V3000
M  V30 BEGIN CTAB
M  V30 COUNTS 25 27 0 0 0
M  V30 BEGIN ATOM
M  V30 1 O 1.9884 -5.3006 0.0 0
M  V30 2 C 2.119 -4.3091 0.0 0
M  V30 3 N 3.0428 -3.9264 0.0 0
M  V30 4 C 1.3256 -3.7004 0.0 0
M  V30 5 C 3.1734 -2.935 0.0 0
M  V30 6 C 1.4561 -2.7089 0.0 0
M  V30 7 C 2.38 -2.3262 0.0 0
M  V30 8 C 4.0972 -2.5523 0.0 0
M  V30 9 C 0.6628 -2.1002 0.0 0
M  V30 10 C 4.2278 -1.5609 0.0 0
M  V30 11 O -0.261 -2.4828 0.0 0
M  V30 12 N 0.7933 -1.1087 0.0 0
M  V30 13 C 0.0 -0.5 0.0 0
M  V30 14 C -0.9659 -0.2411 0.0 0
M  V30 15 C -0.2588 -1.4659 0.0 0
M  V30 16 C 0.866 0.0 0.0 0
M  V30 17 C -1.2247 -1.2071 0.0 0
M  V30 18 N 1.732 -0.5 0.0 0
M  V30 19 C 2.598 0.0 0.0 0
M  V30 20 O 3.4641 -0.5 0.0 0
M  V30 21 C 2.598 1.0 0.0 0
M  V30 22 C 3.407 1.5877 0.0 0
M  V30 23 C 1.789 1.5877 0.0 0
M  V30 24 C 3.098 2.5388 0.0 0
M  V30 25 C 2.098 2.5388 0.0 0
M  V30 END ATOM
M  V30 BEGIN BOND
M  V30 1 2 1 2
M  V30 2 1 2 3
M  V30 3 1 2 4
M  V30 4 1 3 5
M  V30 5 1 4 6
M  V30 6 1 5 7
M  V30 7 1 5 8
M  V30 8 1 6 9
M  V30 9 1 8 10
M  V30 10 2 9 11
M  V30 11 1 9 12
M  V30 12 1 12 13
M  V30 13 1 13 14
M  V30 14 1 13 15
M  V30 15 1 13 16
M  V30 16 1 14 17
M  V30 17 1 16 18
M  V30 18 1 18 19
M  V30 19 2 19 20
M  V30 20 1 19 21
M  V30 21 2 21 22
M  V30 22 1 21 23
M  V30 23 1 22 24
M  V30 24 1 23 25
M  V30 25 1 6 7
M  V30 26 1 15 17
M  V30 27 1 24 25
M  V30 END BOND
M  V30 END CTAB
M  END
>  <ID>
ZINC001062798137

>  <name>
NA

>  <smiles>
CCC1CC(CC(=O)N1)C(=O)NC1(CNC(=O)C2=CCCC2)CCC1

$$$$
ZINC000866107501
Actelion Java MolfileCreator 2.0

  0  0  0  0  0  0              0 V3000
M  V30 BEGIN CTAB
M  V30 COUNTS 24 27 0 0 0
M  V30 BEGIN ATOM
M  V30 1 O 4.9535 -2.6159 0.0 0
M  V30 2 C 4.5467 -1.7024 0.0 0
M  V30 3 O 5.0467 -0.8364 0.0 0
M  V30 4 C 3.5686 -1.4945 0.0 0
M  V30 5 C 4.3776 -0.0932 0.0 0
M  V30 6 C 3.4641 -0.5 0.0 0 CFG=1
M  V30 7 N 2.598 0.0 0.0 0
M  V30 8 C 1.732 -0.5 0.0 0
M  V30 9 O 1.732 -1.5 0.0 0
M  V30 10 N 0.866 0.0 0.0 0
M  V30 11 C 0.0 -0.5 0.0 0
M  V30 12 N -0.9135 -0.0932 0.0 0
M  V30 13 C -0.1045 -1.4945 0.0 0
M  V30 14 N -1.5826 -0.8364 0.0 0
M  V30 15 C -1.1214 0.8848 0.0 0
M  V30 16 C -1.0826 -1.7024 0.0 0
M  V30 17 C -0.3783 1.554 0.0 0
M  V30 18 C -2.0725 1.1939 0.0 0
M  V30 19 C -1.4894 -2.6159 0.0 0
M  V30 20 C -0.5862 2.5321 0.0 0
M  V30 21 C -2.2804 2.172 0.0 0
M  V30 22 C -2.2984 -3.2037 0.0 0
M  V30 23 C -1.3848 -3.6105 0.0 0
M  V30 24 C -1.5372 2.8411 0.0 0
M  V30 END ATOM
M  V30 BEGIN BOND
M  V30 1 2 1 2
M  V30 2 1 2 3
M  V30 3 1 2 4
M  V30 4 1 3 5
M  V30 5 1 6 4
M  V30 6 1 6 7 CFG=3
M  V30 7 1 7 8
M  V30 8 2 8 9
M  V30 9 1 8 10
M  V30 10 2 10 11 CFG=2
M  V30 11 1 11 12
M  V30 12 1 11 13
M  V30 13 1 12 14
M  V30 14 1 12 15
M  V30 15 2 13 16
M  V30 16 2 15 17
M  V30 17 1 15 18
M  V30 18 1 16 19
M  V30 19 1 17 20
M  V30 20 2 18 21
M  V30 21 1 19 22
M  V30 22 1 19 23
M  V30 23 2 20 24
M  V30 24 1 5 6
M  V30 25 1 14 16
M  V30 26 1 21 24
M  V30 27 1 22 23
M  V30 END BOND
M  V30 BEGIN COLLECTION
M  V30 MDLV30/STERAC1 ATOMS=(1 6)
M  V30 END COLLECTION
M  V30 END CTAB
M  END
>  <ID>
ZINC000866107501

>  <name>
NA

>  <smiles>
O=C(NC1COC(=O)C1)N=c1cc([nH]n1-c1ccccc1)C1CC1

$$$$
ZINC000265875367
Actelion Java MolfileCreator 2.0

  0  0  0  0  0  0              0 V3000
M  V30 BEGIN CTAB
M  V30 COUNTS 24 25 0 0 0
M  V30 BEGIN ATOM
M  V30 1 O 11.199 -1.0 0.0 0
M  V30 2 C 10.199 -1.0 0.0 0
M  V30 3 N 9.6113 -0.1909 0.0 0
M  V30 4 N 9.6113 -1.809 0.0 0
M  V30 5 C 8.6602 -0.5 0.0 0
M  V30 6 C 9.9203 0.76 0.0 0
M  V30 7 C 8.6602 -1.5 0.0 0
M  V30 8 C 9.9203 -2.76 0.0 0
M  V30 9 C 7.7942 0.0 0.0 0
M  V30 10 C 7.7942 -2.0 0.0 0
M  V30 11 C 6.9282 -0.5 0.0 0
M  V30 12 C 6.9282 -1.4999 0.0 0
M  V30 13 N 6.0621 0.0 0.0 0
M  V30 14 C 5.1961 -0.5 0.0 0
M  V30 15 O 5.1961 -1.4999 0.0 0
M  V30 16 C 4.3301 0.0 0.0 0
M  V30 17 O 4.3301 1.0 0.0 0
M  V30 18 N 3.4641 -0.5 0.0 0
M  V30 19 C 2.598 0.0 0.0 0
M  V30 20 C 1.732 -0.5 0.0 0 CFG=2
M  V30 21 O 1.732 -1.5 0.0 0
M  V30 22 C 0.866 0.0 0.0 0
M  V30 23 C 0.866 1.0 0.0 0
M  V30 24 C 0.0 -0.5 0.0 0
M  V30 END ATOM
M  V30 BEGIN BOND
M  V30 1 2 1 2
M  V30 2 1 2 3
M  V30 3 1 2 4
M  V30 4 1 3 5
M  V30 5 1 3 6
M  V30 6 1 4 7
M  V30 7 1 4 8
M  V30 8 1 5 9
M  V30 9 1 7 10
M  V30 10 2 9 11
M  V30 11 2 10 12
M  V30 12 1 11 13
M  V30 13 1 13 14
M  V30 14 2 14 15
M  V30 15 1 14 16
M  V30 16 2 16 17
M  V30 17 1 16 18
M  V30 18 1 18 19
M  V30 19 1 20 19
M  V30 20 1 20 21 CFG=3
M  V30 21 1 20 22
M  V30 22 1 22 23
M  V30 23 1 22 24
M  V30 24 2 5 7
M  V30 25 1 11 12
M  V30 END BOND
M  V30 BEGIN COLLECTION
M  V30 MDLV30/STERAC1 ATOMS=(1 20)
M  V30 END COLLECTION
M  V30 END CTAB
M  END
>  <ID>
ZINC000265875367

>  <name>
NA

>  <smiles>
CC(C)C(O)CNC(=O)C(=O)Nc1ccc2n(C)c(=O)n(C)c2c1

$$$$
ZINC000762195648
Actelion Java MolfileCreator 2.0

  0  0  0  0  0  0              0 V3000
M  V30 BEGIN CTAB
M  V30 COUNTS 23 24 0 0 0
M  V30 BEGIN ATOM
M  V30 1 F 6.2942 3.75 0.0 0
M  V30 2 C 7.7942 3.75 0.0 0
M  V30 3 F 7.7942 5.25 0.0 0
M  V30 4 F 9.2942 3.75 0.0 0
M  V30 5 C 7.7942 2.25 0.0 0
M  V30 6 C 6.4952 1.5 0.0 0
M  V30 7 C 9.0932 1.5 0.0 0
M  V30 8 C 6.4952 0.0 0.0 0
M  V30 9 C 9.0932 0.0 0.0 0
M  V30 10 C 7.7942 -0.75 0.0 0
M  V30 11 C 5.1961 -0.75 0.0 0
M  V30 12 O 4.4461 -2.049 0.0 0
M  V30 13 C 3.8971 0.0 0.0 0
M  V30 14 C 5.9461 -2.049 0.0 0
M  V30 15 O 3.8971 1.5 0.0 0
M  V30 16 N 2.598 -0.75 0.0 0
M  V30 17 C 1.299 0.0 0.0 0
M  V30 18 C 1.299 1.5 0.0 0
M  V30 19 C 0.0 -0.75 0.0 0
M  V30 20 N 2.5125 2.3816 0.0 0
M  V30 21 C 0.0855 2.3816 0.0 0
M  V30 22 C 2.049 3.8082 0.0 0
M  V30 23 C 0.549 3.8082 0.0 0
M  V30 END ATOM
M  V30 BEGIN BOND
M  V30 1 1 1 2
M  V30 2 1 2 3
M  V30 3 1 2 4
M  V30 4 1 2 5
M  V30 5 2 5 6
M  V30 6 1 5 7
M  V30 7 1 6 8
M  V30 8 2 7 9
M  V30 9 2 8 10
M  V30 10 1 8 11
M  V30 11 1 11 12
M  V30 12 1 11 13
M  V30 13 1 11 14
M  V30 14 2 13 15
M  V30 15 1 13 16
M  V30 16 1 16 17
M  V30 17 1 17 18
M  V30 18 1 17 19
M  V30 19 1 18 20
M  V30 20 2 18 21
M  V30 21 1 20 22
M  V30 22 1 21 23
M  V30 23 1 9 10
M  V30 24 2 22 23
M  V30 END BOND
M  V30 END CTAB
M  END
>  <ID>
ZINC000762195648

>  <name>
NA

>  <smiles>
CC(NC(=O)C(C)(O)c1cccc(c1)C(F)(F)F)c1ccc[nH]1

$$$$
ZINC001158319873
Actelion Java MolfileCreator 2.0

  0  0  0  0  0  0              0 V3000
M  V30 BEGIN CTAB
M  V30 COUNTS 24 27 0 0 0
M  V30 BEGIN ATOM
M  V30 1 O 10.3761 -2.9418 0.0 0
M  V30 2 C 8.9089 -3.2536 0.0 0
M  V30 3 N 7.7942 -2.2499 0.0 0
M  V30 4 C 8.2988 -4.624 0.0 0
M  V30 5 C 6.4951 -2.9999 0.0 0
M  V30 6 C 7.7942 -0.7499 0.0 0
M  V30 7 C 6.807 -4.4672 0.0 0
M  V30 8 C 8.9089 -5.9943 0.0 0
M  V30 9 C 5.1961 -2.25 0.0 0
M  V30 10 C 6.4951 0.0 0.0 0
M  V30 11 C 5.9253 -5.6807 0.0 0
M  V30 12 C 8.0272 -7.2078 0.0 0
M  V30 13 N 5.1961 -0.75 0.0 0
M  V30 14 C 6.5354 -7.051 0.0 0
M  V30 15 C 3.8971 0.0 0.0 0
M  V30 16 O 3.8971 1.5 0.0 0
M  V30 17 C 2.598 -0.75 0.0 0
M  V30 18 N 2.598 -2.25 0.0 0
M  V30 19 C 1.299 0.0 0.0 0
M  V30 20 C 0.0 -0.75 0.0 0
M  V30 21 N -1.3703 -0.1398 0.0 0
M  V30 22 C -0.1567 -2.2417 0.0 0
M  V30 23 C -2.374 -1.2546 0.0 0
M  V30 24 N -1.624 -2.5536 0.0 0
M  V30 END ATOM
M  V30 BEGIN BOND
M  V30 1 2 1 2
M  V30 2 1 2 3
M  V30 3 1 2 4
M  V30 4 1 3 5
M  V30 5 1 3 6
M  V30 6 2 4 7
M  V30 7 1 4 8
M  V30 8 1 5 9
M  V30 9 1 6 10
M  V30 10 1 7 11
M  V30 11 2 8 12
M  V30 12 1 9 13
M  V30 13 2 11 14
M  V30 14 1 13 15
M  V30 15 2 15 16
M  V30 16 1 15 17
M  V30 17 1 17 18
M  V30 18 1 17 19
M  V30 19 1 19 20
M  V30 20 1 20 21
M  V30 21 2 20 22
M  V30 22 2 21 23
M  V30 23 1 22 24
M  V30 24 1 5 7
M  V30 25 1 10 13
M  V30 26 1 12 14
M  V30 27 1 23 24
M  V30 END BOND
M  V30 END CTAB
M  END
>  <ID>
ZINC001158319873

>  <name>
NA

>  <smiles>
NC(Cc1c[nH]cn1)C(=O)N1CCN2C(C1)c1ccccc1C2=O

$$$$
ZINC000513952080
Actelion Java MolfileCreator 2.0

  0  0  0  0  0  0              0 V3000
M  V30 BEGIN CTAB
M  V30 COUNTS 22 24 0 0 0
M  V30 BEGIN ATOM
M  V30 1 Br 3.3546 -2.6785 0.0 0
M  V30 2 C 2.516 -2.1339 0.0 0
M  V30 3 C 2.5683 -1.1352 0.0 0
M  V30 4 C 1.625 -2.5879 0.0 0
M  V30 5 C 1.7296 -0.5906 0.0 0
M  V30 6 C 0.7863 -2.0432 0.0 0
M  V30 7 C 0.8386 -1.0446 0.0 0
M  V30 8 C 0.0 -0.5 0.0 0
M  V30 9 N 0.866 0.0 0.0 0
M  V30 10 C -0.9135 -0.0932 0.0 0
M  V30 11 C -0.1045 -1.4945 0.0 0
M  V30 12 C 0.866 0.9999 0.0 0
M  V30 13 C -1.5826 -0.8364 0.0 0
M  V30 14 C -1.0826 -1.7024 0.0 0
M  V30 15 O 1.732 1.4999 0.0 0
M  V30 16 C 0.0 1.5 0.0 0 CFG=2
M  V30 17 C -0.866 1.0 0.0 0
M  V30 18 C 0.0 2.5 0.0 0
M  V30 19 C -1.732 1.4999 0.0 0
M  V30 20 C -0.866 2.9999 0.0 0
M  V30 21 O -2.598 1.0 0.0 0
M  V30 22 N -1.732 2.5 0.0 0
M  V30 END ATOM
M  V30 BEGIN BOND
M  V30 1 1 1 2
M  V30 2 2 2 3
M  V30 3 1 2 4
M  V30 4 1 3 5
M  V30 5 2 4 6
M  V30 6 2 5 7
M  V30 7 1 7 8
M  V30 8 1 8 9
M  V30 9 1 8 10
M  V30 10 1 8 11
M  V30 11 1 9 12
M  V30 12 1 10 13
M  V30 13 1 11 14
M  V30 14 2 12 15
M  V30 15 1 16 12 CFG=3
M  V30 16 1 16 17
M  V30 17 1 16 18
M  V30 18 1 17 19
M  V30 19 1 18 20
M  V30 20 2 19 21
M  V30 21 1 19 22
M  V30 22 1 6 7
M  V30 23 1 13 14
M  V30 24 1 20 22
M  V30 END BOND
M  V30 BEGIN COLLECTION
M  V30 MDLV30/STERAC1 ATOMS=(1 16)
M  V30 END COLLECTION
M  V30 END CTAB
M  END
>  <ID>
ZINC000513952080

>  <name>
NA

>  <smiles>
Brc1ccc(cc1)C1(CCCC1)NC(=O)C1CCNC(=O)C1

$$$$
ZINC001054623555
Actelion Java MolfileCreator 2.0

  0  0  0  0  0  0              0 V3000
M  V30 BEGIN CTAB
M  V30 COUNTS 25 27 0 0 0
M  V30 BEGIN ATOM
M  V30 1 O 7.5307 1.384 0.0 0
M  V30 2 C 6.6646 1.884 0.0 0
M  V30 3 N 6.5601 2.8786 0.0 0
M  V30 4 C 5.7511 1.4773 0.0 0
M  V30 5 O 5.582 3.0865 0.0 0
M  V30 6 C 7.3033 3.5477 0.0 0
M  V30 7 C 5.082 2.2205 0.0 0
M  V30 8 C 4.0874 2.1159 0.0 0
M  V30 9 O 3.4997 2.9249 0.0 0
M  V30 10 N 3.6807 1.2024 0.0 0
M  V30 11 C 2.7026 0.9945 0.0 0
M  V30 12 C 4.1807 0.3364 0.0 0
M  V30 13 C 2.598 0.0 0.0 0
M  V30 14 C 3.5116 -0.4067 0.0 0
M  V30 15 N 1.732 -0.5 0.0 0
M  V30 16 C 3.7195 -1.3848 0.0 0
M  V30 17 C 0.866 0.0 0.0 0
M  V30 18 C 0.0 -0.5 0.0 0
M  V30 19 C -0.866 0.0 0.0 0
M  V30 20 C 0.0 -1.4999 0.0 0
M  V30 21 C -1.732 -0.4999 0.0 0
M  V30 22 C -0.866 -1.9999 0.0 0
M  V30 23 C -1.732 -1.4999 0.0 0
M  V30 24 C -2.598 -1.9999 0.0 0
M  V30 25 O -2.598 -2.9999 0.0 0
M  V30 END ATOM
M  V30 BEGIN BOND
M  V30 1 2 1 2
M  V30 2 1 2 3
M  V30 3 1 2 4
M  V30 4 1 3 5
M  V30 5 1 3 6
M  V30 6 2 4 7
M  V30 7 1 7 8
M  V30 8 2 8 9
M  V30 9 1 8 10
M  V30 10 1 10 11
M  V30 11 1 10 12
M  V30 12 1 11 13
M  V30 13 1 12 14
M  V30 14 1 13 15
M  V30 15 1 14 16
M  V30 16 1 15 17
M  V30 17 1 17 18
M  V30 18 2 18 19
M  V30 19 1 18 20
M  V30 20 1 19 21
M  V30 21 2 20 22
M  V30 22 2 21 23
M  V30 23 1 23 24
M  V30 24 1 24 25
M  V30 25 1 5 7
M  V30 26 1 13 14
M  V30 27 1 22 23
M  V30 END BOND
M  V30 END CTAB
M  END
>  <ID>
ZINC001054623555

>  <name>
NA

>  <smiles>
CC1CN(CC1NCc1ccc(CO)cc1)C(=O)c1cc(=O)n(C)o1

$$$$
ZINC001637006936
Actelion Java MolfileCreator 2.0

  0  0  0  0  0  0              0 V3000
M  V30 BEGIN CTAB
M  V30 COUNTS 22 24 0 0 0
M  V30 BEGIN ATOM
M  V30 1 O 7.7942 -0.75 0.0 0
M  V30 2 C 6.4951 0.0 0.0 0
M  V30 3 N 6.4951 1.5 0.0 0
M  V30 4 C 5.1961 -0.7499 0.0 0
M  V30 5 C 5.1961 2.25 0.0 0
M  V30 6 C 3.8971 0.0 0.0 0
M  V30 7 C 3.8971 1.5 0.0 0
M  V30 8 C 5.1961 3.75 0.0 0
M  V30 9 C 2.598 -0.75 0.0 0 CFG=2
M  V30 10 C 2.598 2.25 0.0 0
M  V30 11 C 3.8971 4.5 0.0 0
M  V30 12 O 2.598 -2.25 0.0 0
M  V30 13 N 1.299 0.0 0.0 0
M  V30 14 C 2.598 3.7499 0.0 0
M  V30 15 C 0.0 -0.75 0.0 0
M  V30 16 C -1.299 0.0 0.0 0
M  V30 17 C 0.0 -2.2499 0.0 0
M  V30 18 O -1.299 1.5 0.0 0
M  V30 19 C -2.598 -0.7499 0.0 0
M  V30 20 C -1.299 -2.9999 0.0 0
M  V30 21 C -2.598 -2.2499 0.0 0
M  V30 22 O -3.8971 -2.9999 0.0 0
M  V30 END ATOM
M  V30 BEGIN BOND
M  V30 1 2 1 2
M  V30 2 1 2 3
M  V30 3 1 2 4
M  V30 4 1 3 5
M  V30 5 2 4 6
M  V30 6 2 5 7
M  V30 7 1 5 8
M  V30 8 1 9 6
M  V30 9 1 7 10
M  V30 10 2 8 11
M  V30 11 1 9 12 CFG=3
M  V30 12 1 9 13
M  V30 13 2 10 14
M  V30 14 1 13 15
M  V30 15 2 15 16
M  V30 16 1 15 17
M  V30 17 1 16 18
M  V30 18 1 16 19
M  V30 19 2 17 20
M  V30 20 2 19 21
M  V30 21 1 21 22
M  V30 22 1 6 7
M  V30 23 1 11 14
M  V30 24 1 20 21
M  V30 END BOND
M  V30 BEGIN COLLECTION
M  V30 MDLV30/STERAC1 ATOMS=(1 9)
M  V30 END COLLECTION
M  V30 END CTAB
M  END
>  <ID>
ZINC001637006936

>  <name>
NA

>  <smiles>
OC(Nc1ccc(O)cc1O)c1cc(=O)[nH]c2ccccc12

$$$$
ZINC000803123002
Actelion Java MolfileCreator 2.0

  0  0  0  0  0  0              0 V3000
M  V30 BEGIN CTAB
M  V30 COUNTS 22 23 0 0 0
M  V30 BEGIN ATOM
M  V30 1 F 2.4641 2.5 0.0 0
M  V30 2 C 3.4641 2.5 0.0 0
M  V30 3 F 3.4641 3.5 0.0 0
M  V30 4 F 4.4641 2.5 0.0 0
M  V30 5 C 3.4641 1.5 0.0 0
M  V30 6 C 2.598 1.0 0.0 0
M  V30 7 C 4.3301 1.0 0.0 0
M  V30 8 C 2.598 0.0 0.0 0
M  V30 9 C 4.3301 0.0 0.0 0
M  V30 10 C 3.4641 -0.4999 0.0 0
M  V30 11 C 1.732 -0.5 0.0 0
M  V30 12 O 1.732 -1.5 0.0 0
M  V30 13 C 0.866 0.0 0.0 0
M  V30 14 O 0.866 1.0 0.0 0
M  V30 15 N 0.0 -0.5 0.0 0
M  V30 16 C -0.866 0.0 0.0 0
M  V30 17 C 0.0 -1.4999 0.0 0
M  V30 18 C -1.732 -0.4999 0.0 0
M  V30 19 C -0.866 -1.9999 0.0 0
M  V30 20 C -1.732 -1.4999 0.0 0
M  V30 21 C -2.598 0.0 0.0 0
M  V30 22 O -2.598 -1.9999 0.0 0
M  V30 END ATOM
M  V30 BEGIN BOND
M  V30 1 1 1 2
M  V30 2 1 2 3
M  V30 3 1 2 4
M  V30 4 1 2 5
M  V30 5 2 5 6
M  V30 6 1 5 7
M  V30 7 1 6 8
M  V30 8 2 7 9
M  V30 9 2 8 10
M  V30 10 1 8 11
M  V30 11 1 11 12
M  V30 12 1 11 13
M  V30 13 2 13 14
M  V30 14 1 13 15
M  V30 15 1 15 16
M  V30 16 1 15 17
M  V30 17 1 16 18
M  V30 18 1 17 19
M  V30 19 1 18 20
M  V30 20 1 18 21
M  V30 21 2 20 22
M  V30 22 1 9 10
M  V30 23 1 19 20
M  V30 END BOND
M  V30 END CTAB
M  END
>  <ID>
ZINC000803123002

>  <name>
NA

>  <smiles>
CC1CN(CCC1=O)C(=O)C(O)c1cccc(c1)C(F)(F)F

$$$$
ZINC000348052717
Actelion Java MolfileCreator 2.0

  0  0  0  0  0  0              0 V3000
M  V30 BEGIN CTAB
M  V30 COUNTS 25 26 0 0 0
M  V30 BEGIN ATOM
M  V30 1 O 16.7986 -1.5 0.0 0
M  V30 2 C 15.2986 -1.5 0.0 0
M  V30 3 N 14.4169 -0.2864 0.0 0
M  V30 4 N 14.4169 -2.7135 0.0 0
M  V30 5 C 12.9904 -0.75 0.0 0
M  V30 6 C 14.8805 1.1401 0.0 0
M  V30 7 C 12.9904 -2.25 0.0 0
M  V30 8 C 14.8805 -4.1401 0.0 0
M  V30 9 C 11.6913 0.0 0.0 0
M  V30 10 C 11.6913 -3.0 0.0 0
M  V30 11 C 10.3923 -0.75 0.0 0
M  V30 12 C 10.3923 -2.25 0.0 0
M  V30 13 N 9.0932 0.0 0.0 0
M  V30 14 C 7.7942 -0.75 0.0 0
M  V30 15 O 7.7942 -2.25 0.0 0
M  V30 16 C 6.4952 0.0 0.0 0
M  V30 17 O 6.4952 1.5 0.0 0
M  V30 18 N 5.1961 -0.75 0.0 0
M  V30 19 C 3.8971 0.0 0.0 0
M  V30 20 C 2.598 -0.75 0.0 0 CFG=2
M  V30 21 O 1.848 -2.049 0.0 0
M  V30 22 C 1.299 0.0 0.0 0
M  V30 23 C 3.348 -2.049 0.0 0
M  V30 24 C 1.299 1.5 0.0 0
M  V30 25 C 0.0 -0.75 0.0 0
M  V30 END ATOM
M  V30 BEGIN BOND
M  V30 1 2 1 2
M  V30 2 1 2 3
M  V30 3 1 2 4
M  V30 4 1 3 5
M  V30 5 1 3 6
M  V30 6 1 4 7
M  V30 7 1 4 8
M  V30 8 1 5 9
M  V30 9 1 7 10
M  V30 10 2 9 11
M  V30 11 2 10 12
M  V30 12 1 11 13
M  V30 13 1 13 14
M  V30 14 2 14 15
M  V30 15 1 14 16
M  V30 16 2 16 17
M  V30 17 1 16 18
M  V30 18 1 18 19
M  V30 19 1 20 19
M  V30 20 1 20 21 CFG=3
M  V30 21 1 20 22
M  V30 22 1 20 23
M  V30 23 1 22 24
M  V30 24 1 22 25
M  V30 25 2 5 7
M  V30 26 1 11 12
M  V30 END BOND
M  V30 BEGIN COLLECTION
M  V30 MDLV30/STERAC1 ATOMS=(1 20)
M  V30 END COLLECTION
M  V30 END CTAB
M  END
>  <ID>
ZINC000348052717

>  <name>
NA

>  <smiles>
CC(C)C(C)(O)CNC(=O)C(=O)Nc1ccc2n(C)c(=O)n(C)c2c1

$$$$
ZINC001163079302
Actelion Java MolfileCreator 2.0

  0  0  0  0  0  0              0 V3000
M  V30 BEGIN CTAB
M  V30 COUNTS 25 26 0 0 0
M  V30 BEGIN ATOM
M  V30 1 O 7.7942 -3.0 0.0 0
M  V30 2 C 7.7942 -2.0 0.0 0
M  V30 3 N 8.6602 -1.5 0.0 0
M  V30 4 C 6.9282 -1.4999 0.0 0
M  V30 5 C 8.6602 -0.5 0.0 0
M  V30 6 C 6.9282 -0.5 0.0 0
M  V30 7 C 7.7942 0.0 0.0 0
M  V30 8 C 9.5262 0.0 0.0 0
M  V30 9 C 6.0621 0.0 0.0 0
M  V30 10 C 9.5262 0.9999 0.0 0
M  V30 11 O 6.0621 0.9999 0.0 0
M  V30 12 N 5.1961 -0.5 0.0 0
M  V30 13 C 4.3301 0.0 0.0 0
M  V30 14 C 3.4641 -0.5 0.0 0
M  V30 15 C 2.598 0.0 0.0 0
M  V30 16 N 1.732 -0.5 0.0 0
M  V30 17 C 0.866 0.0 0.0 0
M  V30 18 C 0.0 -0.5 0.0 0
M  V30 19 C -0.866 0.0 0.0 0
M  V30 20 C 0.0 -1.4999 0.0 0
M  V30 21 C -1.732 -0.4999 0.0 0
M  V30 22 C -0.866 -1.9999 0.0 0
M  V30 23 C -1.732 -1.4999 0.0 0
M  V30 24 C -2.598 0.0 0.0 0
M  V30 25 C -3.4641 -0.4999 0.0 0
M  V30 END ATOM
M  V30 BEGIN BOND
M  V30 1 2 1 2
M  V30 2 1 2 3
M  V30 3 1 2 4
M  V30 4 1 3 5
M  V30 5 1 4 6
M  V30 6 1 5 7
M  V30 7 1 5 8
M  V30 8 1 6 9
M  V30 9 1 8 10
M  V30 10 2 9 11
M  V30 11 1 9 12
M  V30 12 1 12 13
M  V30 13 1 13 14
M  V30 14 1 14 15
M  V30 15 1 15 16
M  V30 16 1 16 17
M  V30 17 1 17 18
M  V30 18 2 18 19
M  V30 19 1 18 20
M  V30 20 1 19 21
M  V30 21 2 20 22
M  V30 22 2 21 23
M  V30 23 1 21 24
M  V30 24 1 24 25
M  V30 25 1 6 7
M  V30 26 1 22 23
M  V30 END BOND
M  V30 END CTAB
M  END
>  <ID>
ZINC001163079302

>  <name>
NA

>  <smiles>
CCC1CC(CC(=O)N1)C(=O)NCCCNCc1cccc(CC)c1

$$$$
ZINC000363892025
Actelion Java MolfileCreator 2.0

  0  0  0  0  0  0              0 V3000
M  V30 BEGIN CTAB
M  V30 COUNTS 25 27 0 0 0
M  V30 BEGIN ATOM
M  V30 1 O 2.598 3.9999 0.0 0
M  V30 2 C 2.598 2.9999 0.0 0
M  V30 3 N 3.4641 2.4999 0.0 0
M  V30 4 C 1.732 2.4999 0.0 0
M  V30 5 C 3.4641 1.4999 0.0 0
M  V30 6 C 1.732 1.4999 0.0 0 CFG=2
M  V30 7 C 2.598 0.9999 0.0 0
M  V30 8 C 0.866 0.9999 0.0 0
M  V30 9 O 0.0 1.5 0.0 0
M  V30 10 N 0.866 0.0 0.0 0
M  V30 11 C 0.0 -0.5 0.0 0
M  V30 12 C 0.8841 -0.9672 0.0 0
M  V30 13 C -0.8262 0.0633 0.0 0
M  V30 14 C 0.0747 -1.4972 0.0 0
M  V30 15 C 0.9215 -1.9665 0.0 0
M  V30 16 C 1.7308 -0.4352 0.0 0
M  V30 17 C -1.7818 -0.2314 0.0 0
M  V30 18 C -0.6583 -2.1773 0.0 0
M  V30 19 C 1.8056 -2.4338 0.0 0
M  V30 20 C 2.6149 -0.9025 0.0 0
M  V30 21 C -2.1471 -1.1623 0.0 0
M  V30 22 C -1.6471 -2.0283 0.0 0
M  V30 23 C 2.6523 -1.9018 0.0 0
M  V30 24 O 3.5364 -2.369 0.0 0
M  V30 25 C 4.3831 -1.837 0.0 0
M  V30 END ATOM
M  V30 BEGIN BOND
M  V30 1 2 1 2
M  V30 2 1 2 3
M  V30 3 1 2 4
M  V30 4 1 3 5
M  V30 5 1 6 4
M  V30 6 1 5 7
M  V30 7 1 6 8 CFG=3
M  V30 8 2 8 9
M  V30 9 1 8 10
M  V30 10 1 10 11
M  V30 11 1 11 12
M  V30 12 1 11 13
M  V30 13 1 11 14
M  V30 14 2 12 15
M  V30 15 1 12 16
M  V30 16 1 13 17
M  V30 17 1 14 18
M  V30 18 1 15 19
M  V30 19 2 16 20
M  V30 20 1 17 21
M  V30 21 1 18 22
M  V30 22 2 19 23
M  V30 23 1 23 24
M  V30 24 1 24 25
M  V30 25 1 6 7
M  V30 26 1 20 23
M  V30 27 1 21 22
M  V30 END BOND
M  V30 BEGIN COLLECTION
M  V30 MDLV30/STERAC1 ATOMS=(1 6)
M  V30 END COLLECTION
M  V30 END CTAB
M  END
>  <ID>
ZINC000363892025

>  <name>
NA

>  <smiles>
COc1ccc(cc1)C1(CCCCCC1)NC(=O)C1CCNC(=O)C1

$$$$
ZINC000363970294
Actelion Java MolfileCreator 2.0

  0  0  0  0  0  0              0 V3000
M  V30 BEGIN CTAB
M  V30 COUNTS 25 28 0 0 0
M  V30 BEGIN ATOM
M  V30 1 O 4.9535 -2.6159 0.0 0
M  V30 2 C 4.5467 -1.7024 0.0 0
M  V30 3 O 5.0467 -0.8364 0.0 0
M  V30 4 C 3.5686 -1.4945 0.0 0
M  V30 5 C 4.3776 -0.0932 0.0 0
M  V30 6 C 3.4641 -0.5 0.0 0
M  V30 7 C 2.598 0.0 0.0 0
M  V30 8 C 1.732 -0.5 0.0 0
M  V30 9 O 1.732 -1.5 0.0 0
M  V30 10 N 0.866 0.0 0.0 0
M  V30 11 C 0.0 -0.5 0.0 0
M  V30 12 N -0.9135 -0.0932 0.0 0
M  V30 13 C -0.1045 -1.4945 0.0 0
M  V30 14 N -1.5826 -0.8364 0.0 0
M  V30 15 C -1.1214 0.8848 0.0 0
M  V30 16 C -1.0826 -1.7024 0.0 0
M  V30 17 C -0.3783 1.554 0.0 0
M  V30 18 C -2.0725 1.1939 0.0 0
M  V30 19 C -1.4894 -2.6159 0.0 0
M  V30 20 C -0.5862 2.5321 0.0 0
M  V30 21 C -2.2804 2.172 0.0 0
M  V30 22 C -2.2984 -3.2037 0.0 0
M  V30 23 C -1.3848 -3.6105 0.0 0
M  V30 24 C -1.5372 2.8411 0.0 0
M  V30 25 C -3.2929 -3.3082 0.0 0
M  V30 END ATOM
M  V30 BEGIN BOND
M  V30 1 2 1 2
M  V30 2 1 2 3
M  V30 3 1 2 4
M  V30 4 1 3 5
M  V30 5 1 4 6
M  V30 6 1 6 7
M  V30 7 1 7 8
M  V30 8 2 8 9
M  V30 9 1 8 10
M  V30 10 2 10 11 CFG=2
M  V30 11 1 11 12
M  V30 12 1 11 13
M  V30 13 1 12 14
M  V30 14 1 12 15
M  V30 15 2 13 16
M  V30 16 2 15 17
M  V30 17 1 15 18
M  V30 18 1 16 19
M  V30 19 1 17 20
M  V30 20 2 18 21
M  V30 21 1 19 22
M  V30 22 1 19 23
M  V30 23 2 20 24
M  V30 24 1 22 25
M  V30 25 1 5 6
M  V30 26 1 14 16
M  V30 27 1 21 24
M  V30 28 1 22 23
M  V30 END BOND
M  V30 END CTAB
M  END
>  <ID>
ZINC000363970294

>  <name>
NA

>  <smiles>
CC1CC1c1cc(=NC(=O)CC2COC(=O)C2)n([nH]1)-c1ccccc1

$$$$
ZINC000855918614
Actelion Java MolfileCreator 2.0

  0  0  0  0  0  0              0 V3000
M  V30 BEGIN CTAB
M  V30 COUNTS 23 24 0 0 0
M  V30 BEGIN ATOM
M  V30 1 F 2.4641 2.5 0.0 0
M  V30 2 C 3.4641 2.5 0.0 0
M  V30 3 F 3.4641 3.5 0.0 0
M  V30 4 F 4.4641 2.5 0.0 0
M  V30 5 C 3.4641 1.5 0.0 0
M  V30 6 C 2.598 1.0 0.0 0
M  V30 7 C 4.3301 1.0 0.0 0
M  V30 8 C 2.598 0.0 0.0 0
M  V30 9 C 4.3301 0.0 0.0 0
M  V30 10 C 3.4641 -0.4999 0.0 0
M  V30 11 C 1.732 -0.5 0.0 0 CFG=1
M  V30 12 O 1.732 -1.5 0.0 0
M  V30 13 C 0.866 0.0 0.0 0
M  V30 14 O 0.866 1.0 0.0 0
M  V30 15 N 0.0 -0.5 0.0 0
M  V30 16 C -0.8262 0.0633 0.0 0
M  V30 17 C 0.0747 -1.4972 0.0 0
M  V30 18 C -1.7818 -0.2314 0.0 0
M  V30 19 C -0.6583 -2.1773 0.0 0
M  V30 20 N -2.1471 -1.1623 0.0 0
M  V30 21 C -1.6471 -2.0283 0.0 0
M  V30 22 C -3.1443 -1.237 0.0 0
M  V30 23 O -2.2104 -2.8545 0.0 0
M  V30 END ATOM
M  V30 BEGIN BOND
M  V30 1 1 1 2
M  V30 2 1 2 3
M  V30 3 1 2 4
M  V30 4 1 2 5
M  V30 5 2 5 6
M  V30 6 1 5 7
M  V30 7 1 6 8
M  V30 8 2 7 9
M  V30 9 2 8 10
M  V30 10 1 11 8
M  V30 11 1 11 12 CFG=1
M  V30 12 1 11 13
M  V30 13 2 13 14
M  V30 14 1 13 15
M  V30 15 1 15 16
M  V30 16 1 15 17
M  V30 17 1 16 18
M  V30 18 1 17 19
M  V30 19 1 18 20
M  V30 20 1 19 21
M  V30 21 1 20 22
M  V30 22 2 21 23
M  V30 23 1 9 10
M  V30 24 1 20 21
M  V30 END BOND
M  V30 BEGIN COLLECTION
M  V30 MDLV30/STERAC1 ATOMS=(1 11)
M  V30 END COLLECTION
M  V30 END CTAB
M  END
>  <ID>
ZINC000855918614

>  <name>
NA

>  <smiles>
CN1CCN(CCC1=O)C(=O)C(O)c1cccc(c1)C(F)(F)F

$$$$
ZINC001459940633
Actelion Java MolfileCreator 2.0

  0  0  0  0  0  0              0 V3000
M  V30 BEGIN CTAB
M  V30 COUNTS 22 24 0 0 0
M  V30 BEGIN ATOM
M  V30 1 F 6.307 0.3939 0.0 0
M  V30 2 C 6.4638 -1.0978 0.0 0
M  V30 3 F 7.9556 -0.941 0.0 0
M  V30 4 F 6.6206 -2.5896 0.0 0
M  V30 5 C 4.972 -1.2546 0.0 0 CFG=1
M  V30 6 O 5.789 -2.5126 0.0 0
M  V30 7 C 3.9683 -0.1398 0.0 0
M  V30 8 C 4.222 -2.5536 0.0 0
M  V30 9 N 2.598 -0.75 0.0 0
M  V30 10 C 2.7548 -2.2417 0.0 0
M  V30 11 C 1.299 0.0 0.0 0
M  V30 12 C 0.0 -0.75 0.0 0
M  V30 13 N -1.299 0.0 0.0 0
M  V30 14 C 0.0 -2.2499 0.0 0
M  V30 15 C -2.598 -0.7499 0.0 0
M  V30 16 C -1.299 -2.9999 0.0 0
M  V30 17 N -4.0246 -0.2864 0.0 0
M  V30 18 N -2.598 -2.2499 0.0 0
M  V30 19 O -1.299 -4.4999 0.0 0
M  V30 20 C -4.9063 -1.4999 0.0 0
M  V30 21 N -4.0246 -2.7135 0.0 0
M  V30 22 N -6.4063 -1.4999 0.0 0
M  V30 END ATOM
M  V30 BEGIN BOND
M  V30 1 1 1 2
M  V30 2 1 2 3
M  V30 3 1 2 4
M  V30 4 1 5 2
M  V30 5 1 5 6 CFG=1
M  V30 6 1 5 7
M  V30 7 1 5 8
M  V30 8 1 7 9
M  V30 9 1 8 10
M  V30 10 1 9 11
M  V30 11 1 11 12
M  V30 12 1 12 13
M  V30 13 2 12 14
M  V30 14 1 13 15
M  V30 15 1 14 16
M  V30 16 2 15 17
M  V30 17 1 15 18
M  V30 18 2 16 19
M  V30 19 1 17 20
M  V30 20 1 18 21
M  V30 21 2 20 22
M  V30 22 1 9 10
M  V30 23 1 16 18
M  V30 24 1 20 21
M  V30 END BOND
M  V30 BEGIN COLLECTION
M  V30 MDLV30/STERAC1 ATOMS=(1 5)
M  V30 END COLLECTION
M  V30 END CTAB
M  END
>  <ID>
ZINC001459940633

>  <name>
NA

>  <smiles>
OC1(CCN(Cc2cc(=O)n3[nH]c(=N)nc3[nH]2)C1)C(F)(F)F

$$$$
ZINC001236058275
Actelion Java MolfileCreator 2.0

  0  0  0  0  0  0              0 V3000
M  V30 BEGIN CTAB
M  V30 COUNTS 24 26 0 0 0
M  V30 BEGIN ATOM
M  V30 1 F 4.8301 -1.1339 0.0 0
M  V30 2 C 4.3301 -1.9999 0.0 0
M  V30 3 F 5.1961 -2.5 0.0 0
M  V30 4 F 3.8301 -2.866 0.0 0
M  V30 5 C 3.4641 -1.4999 0.0 0
M  V30 6 C 3.4641 -0.5 0.0 0
M  V30 7 C 2.598 -1.9999 0.0 0
M  V30 8 C 2.598 0.0 0.0 0
M  V30 9 C 1.732 -1.5 0.0 0
M  V30 10 C 2.598 1.0 0.0 0
M  V30 11 C 1.732 -0.5 0.0 0
M  V30 12 N 3.4641 1.5 0.0 0
M  V30 13 C 1.732 1.4999 0.0 0
M  V30 14 C 0.866 0.0 0.0 0
M  V30 15 C 3.4641 2.5 0.0 0
M  V30 16 C 1.732 2.5 0.0 0
M  V30 17 O 0.0 -0.5 0.0 0
M  V30 18 C 2.598 3.0 0.0 0
M  V30 19 N 0.866 3.0 0.0 0
M  V30 20 C 0.866 4.0 0.0 0
M  V30 21 C 0.0 2.5 0.0 0
M  V30 22 C 0.0 4.5 0.0 0
M  V30 23 C -0.866 3.0 0.0 0
M  V30 24 N -0.866 4.0 0.0 0
M  V30 END ATOM
M  V30 BEGIN BOND
M  V30 1 1 1 2
M  V30 2 1 2 3
M  V30 3 1 2 4
M  V30 4 1 2 5
M  V30 5 2 5 6
M  V30 6 1 5 7
M  V30 7 1 6 8
M  V30 8 2 7 9
M  V30 9 1 8 10
M  V30 10 2 8 11
M  V30 11 2 10 12
M  V30 12 1 10 13
M  V30 13 1 11 14
M  V30 14 1 12 15
M  V30 15 2 13 16
M  V30 16 1 14 17
M  V30 17 2 15 18
M  V30 18 1 16 19
M  V30 19 1 19 20
M  V30 20 1 19 21
M  V30 21 1 20 22
M  V30 22 1 21 23
M  V30 23 1 22 24
M  V30 24 1 9 11
M  V30 25 1 16 18
M  V30 26 1 23 24
M  V30 END BOND
M  V30 END CTAB
M  END
>  <ID>
ZINC001236058275

>  <name>
NA

>  <smiles>
OCc1ccc(cc1-c1cc(ccn1)N1CCNCC1)C(F)(F)F

$$$$
ZINC001363794934
Actelion Java MolfileCreator 2.0

  0  0  0  0  0  0              0 V3000
M  V30 BEGIN CTAB
M  V30 COUNTS 21 24 0 0 0
M  V30 BEGIN ATOM
M  V30 1 O 2.598 -3.0 0.0 0
M  V30 2 C 2.598 -1.9999 0.0 0
M  V30 3 N 3.4641 -1.4999 0.0 0
M  V30 4 C 1.732 -1.4999 0.0 0
M  V30 5 N 4.4151 -1.809 0.0 0
M  V30 6 C 3.4641 -0.4999 0.0 0
M  V30 7 C 1.732 -0.5 0.0 0
M  V30 8 C 5.0029 -0.9999 0.0 0
M  V30 9 N 4.4151 -0.1909 0.0 0
M  V30 10 N 2.598 0.0 0.0 0
M  V30 11 C 0.866 0.0 0.0 0
M  V30 12 N 6.0029 -0.9999 0.0 0
M  V30 13 N 0.0 -0.5 0.0 0
M  V30 14 C -0.9135 -0.0932 0.0 0
M  V30 15 C -0.1045 -1.4945 0.0 0
M  V30 16 C -1.5826 -0.8364 0.0 0 CFG=2
M  V30 17 C -1.0826 -1.7024 0.0 0
M  V30 18 O -1.941 0.0971 0.0 0
M  V30 19 C -2.5771 -0.7318 0.0 0
M  V30 20 C -3.3862 -0.144 0.0 0
M  V30 21 C -3.4907 -1.1386 0.0 0
M  V30 END ATOM
M  V30 BEGIN BOND
M  V30 1 2 1 2
M  V30 2 1 2 3
M  V30 3 1 2 4
M  V30 4 1 3 5
M  V30 5 1 3 6
M  V30 6 2 4 7
M  V30 7 1 5 8
M  V30 8 2 6 9
M  V30 9 1 6 10
M  V30 10 1 7 11
M  V30 11 2 8 12
M  V30 12 1 11 13
M  V30 13 1 13 14
M  V30 14 1 13 15
M  V30 15 1 16 14
M  V30 16 1 15 17
M  V30 17 1 16 18 CFG=3
M  V30 18 1 16 19
M  V30 19 1 19 20
M  V30 20 1 19 21
M  V30 21 1 7 10
M  V30 22 1 8 9
M  V30 23 1 16 17
M  V30 24 1 20 21
M  V30 END BOND
M  V30 BEGIN COLLECTION
M  V30 MDLV30/STERAC1 ATOMS=(1 16)
M  V30 END COLLECTION
M  V30 END CTAB
M  END
>  <ID>
ZINC001363794934

>  <name>
NA

>  <smiles>
OC1(CCN(Cc2cc(=O)n3[nH]c(=N)nc3[nH]2)C1)C1CC1

$$$$
ZINC000633147931
Actelion Java MolfileCreator 2.0

  0  0  0  0  0  0              0 V3000
M  V30 BEGIN CTAB
M  V30 COUNTS 25 28 0 0 0
M  V30 BEGIN ATOM
M  V30 1 O 6.8689 0.5 0.0 0
M  V30 2 C 5.8689 0.5 0.0 0
M  V30 3 N 5.2811 1.309 0.0 0
M  V30 4 N 5.2811 -0.309 0.0 0
M  V30 5 C 4.3301 1.0 0.0 0
M  V30 6 C 5.5902 2.26 0.0 0
M  V30 7 C 4.3301 0.0 0.0 0
M  V30 8 C 5.5902 -1.26 0.0 0
M  V30 9 C 3.4641 1.4999 0.0 0
M  V30 10 C 3.4641 -0.5 0.0 0
M  V30 11 C 2.598 0.9999 0.0 0
M  V30 12 C 2.598 0.0 0.0 0
M  V30 13 O 1.732 1.4999 0.0 0
M  V30 14 N 1.732 -0.5 0.0 0
M  V30 15 C 0.866 0.0 0.0 0
M  V30 16 O 0.866 1.0 0.0 0
M  V30 17 C 0.0 -0.5 0.0 0
M  V30 18 C -1.0 -0.4999 0.0 0
M  V30 19 C -0.5 -1.366 0.0 0
M  V30 20 C -1.866 0.0 0.0 0
M  V30 21 C -1.866 1.0 0.0 0
M  V30 22 C -2.732 -0.4999 0.0 0
M  V30 23 C -2.732 1.5 0.0 0
M  V30 24 C -3.598 0.0 0.0 0
M  V30 25 O -3.598 1.0 0.0 0
M  V30 END ATOM
M  V30 BEGIN BOND
M  V30 1 2 1 2
M  V30 2 1 2 3
M  V30 3 1 2 4
M  V30 4 1 3 5
M  V30 5 1 3 6
M  V30 6 1 4 7
M  V30 7 1 4 8
M  V30 8 1 5 9
M  V30 9 1 7 10
M  V30 10 2 9 11
M  V30 11 2 10 12
M  V30 12 1 11 13
M  V30 13 1 12 14
M  V30 14 1 14 15
M  V30 15 2 15 16
M  V30 16 1 15 17
M  V30 17 1 17 18
M  V30 18 1 17 19
M  V30 19 1 18 20
M  V30 20 1 20 21
M  V30 21 1 20 22
M  V30 22 1 21 23
M  V30 23 1 22 24
M  V30 24 1 23 25
M  V30 25 2 5 7
M  V30 26 1 11 12
M  V30 27 1 18 19
M  V30 28 1 24 25
M  V30 END BOND
M  V30 END CTAB
M  END
>  <ID>
ZINC000633147931

>  <name>
NA

>  <smiles>
Cn1c2cc(O)c(NC(=O)C3CC3C3CCOCC3)cc2n(C)c1=O

$$$$
ZINC000760250660
Actelion Java MolfileCreator 2.0

  0  0  0  0  0  0              0 V3000
M  V30 BEGIN CTAB
M  V30 COUNTS 25 27 0 0 0
M  V30 BEGIN ATOM
M  V30 1 O 3.4641 -1.5 0.0 0
M  V30 2 C 3.4641 -0.5 0.0 0
M  V30 3 N 4.3301 0.0 0.0 0
M  V30 4 C 2.598 0.0 0.0 0
M  V30 5 C 5.1961 -0.5 0.0 0
M  V30 6 N 1.732 -0.5 0.0 0
M  V30 7 C 2.598 1.0 0.0 0
M  V30 8 C 6.0621 0.0 0.0 0
M  V30 9 C 0.866 0.0 0.0 0
M  V30 10 C 3.4641 1.5 0.0 0
M  V30 11 C 1.732 1.4999 0.0 0
M  V30 12 C 6.9282 -0.5 0.0 0
M  V30 13 C 6.0621 0.9999 0.0 0
M  V30 14 C 0.0 -0.5 0.0 0
M  V30 15 C 0.866 0.9999 0.0 0
M  V30 16 C 3.4641 2.5 0.0 0
M  V30 17 C 1.732 2.5 0.0 0
M  V30 18 C 7.7942 0.0 0.0 0
M  V30 19 C 6.9282 1.4999 0.0 0
M  V30 20 N -0.1045 -1.4945 0.0 0
M  V30 21 C -0.9135 -0.0932 0.0 0
M  V30 22 C 2.598 3.0 0.0 0
M  V30 23 C 7.7942 0.9999 0.0 0
M  V30 24 C -1.0826 -1.7024 0.0 0
M  V30 25 C -1.5826 -0.8364 0.0 0
M  V30 END ATOM
M  V30 BEGIN BOND
M  V30 1 2 1 2
M  V30 2 1 2 3
M  V30 3 1 2 4
M  V30 4 1 3 5
M  V30 5 1 4 6
M  V30 6 1 4 7
M  V30 7 1 5 8
M  V30 8 1 6 9
M  V30 9 2 7 10
M  V30 10 1 7 11
M  V30 11 2 8 12
M  V30 12 1 8 13
M  V30 13 1 9 14
M  V30 14 1 9 15
M  V30 15 1 10 16
M  V30 16 2 11 17
M  V30 17 1 12 18
M  V30 18 2 13 19
M  V30 19 1 14 20
M  V30 20 2 14 21
M  V30 21 2 16 22
M  V30 22 2 18 23
M  V30 23 1 20 24
M  V30 24 1 21 25
M  V30 25 1 17 22
M  V30 26 1 19 23
M  V30 27 2 24 25
M  V30 END BOND
M  V30 END CTAB
M  END
>  <ID>
ZINC000760250660

>  <name>
NA

>  <smiles>
CC(NC(C(=O)NCc1ccccc1)c1ccccc1)c1ccc[nH]1

$$$$
ZINC000680425783
Actelion Java MolfileCreator 2.0

  0  0  0  0  0  0              0 V3000
M  V30 BEGIN CTAB
M  V30 COUNTS 21 23 0 0 0
M  V30 BEGIN ATOM
M  V30 1 O 5.1961 -0.5 0.0 0
M  V30 2 C 4.3301 0.0 0.0 0
M  V30 3 N 4.3301 1.0 0.0 0
M  V30 4 C 3.4641 -0.4999 0.0 0
M  V30 5 C 3.4641 1.5 0.0 0
M  V30 6 C 2.598 0.0 0.0 0
M  V30 7 C 2.598 1.0 0.0 0
M  V30 8 C 3.4641 2.5 0.0 0
M  V30 9 C 1.732 -0.5 0.0 0
M  V30 10 O 1.732 -1.5 0.0 0
M  V30 11 N 0.866 0.0 0.0 0
M  V30 12 C 0.0 -0.5 0.0 0
M  V30 13 C -0.1305 0.4914 0.0 0
M  V30 14 C -0.2588 -1.4659 0.0 0
M  V30 15 C -0.9659 -0.2411 0.0 0
M  V30 16 C -1.0544 0.8741 0.0 0
M  V30 17 C 0.6628 1.1002 0.0 0
M  V30 18 C -1.2247 -1.2071 0.0 0
M  V30 19 C -1.1849 1.8655 0.0 0
M  V30 20 C 0.5323 2.0916 0.0 0
M  V30 21 C -0.3915 2.4743 0.0 0
M  V30 END ATOM
M  V30 BEGIN BOND
M  V30 1 2 1 2
M  V30 2 1 2 3
M  V30 3 1 2 4
M  V30 4 1 3 5
M  V30 5 1 4 6
M  V30 6 1 5 7
M  V30 7 1 5 8
M  V30 8 1 6 9
M  V30 9 2 9 10
M  V30 10 1 9 11
M  V30 11 1 11 12
M  V30 12 1 12 13
M  V30 13 1 12 14
M  V30 14 1 12 15
M  V30 15 2 13 16
M  V30 16 1 13 17
M  V30 17 1 14 18
M  V30 18 1 16 19
M  V30 19 2 17 20
M  V30 20 2 19 21
M  V30 21 1 6 7
M  V30 22 1 15 18
M  V30 23 1 20 21
M  V30 END BOND
M  V30 END CTAB
M  END
>  <ID>
ZINC000680425783

>  <name>
NA

>  <smiles>
CC1CC(CC(=O)N1)C(=O)NC1(CCC1)c1ccccc1

$$$$
ZINC000152403867
Actelion Java MolfileCreator 2.0

  0  0  0  0  0  0              0 V3000
M  V30 BEGIN CTAB
M  V30 COUNTS 22 24 0 0 0
M  V30 BEGIN ATOM
M  V30 1 Cl 1.5726 -3.5865 0.0 0
M  V30 2 C 1.625 -2.5879 0.0 0
M  V30 3 C 0.7863 -2.0432 0.0 0
M  V30 4 C 2.516 -2.1339 0.0 0
M  V30 5 C 0.8386 -1.0446 0.0 0
M  V30 6 C 2.5683 -1.1352 0.0 0
M  V30 7 C 1.7296 -0.5906 0.0 0
M  V30 8 C 0.0 -0.5 0.0 0
M  V30 9 N 0.866 0.0 0.0 0
M  V30 10 C -0.9135 -0.0932 0.0 0
M  V30 11 C -0.1045 -1.4945 0.0 0
M  V30 12 C 0.866 0.9999 0.0 0
M  V30 13 C -1.5826 -0.8364 0.0 0
M  V30 14 C -1.0826 -1.7024 0.0 0
M  V30 15 O 1.732 1.4999 0.0 0
M  V30 16 C 0.0 1.5 0.0 0 CFG=2
M  V30 17 C 0.0 2.5 0.0 0
M  V30 18 C -0.866 1.0 0.0 0
M  V30 19 C -0.866 3.0 0.0 0
M  V30 20 C -1.732 1.5 0.0 0
M  V30 21 O -0.866 4.0 0.0 0
M  V30 22 N -1.732 2.5 0.0 0
M  V30 END ATOM
M  V30 BEGIN BOND
M  V30 1 1 1 2
M  V30 2 2 2 3
M  V30 3 1 2 4
M  V30 4 1 3 5
M  V30 5 2 4 6
M  V30 6 2 5 7
M  V30 7 1 5 8
M  V30 8 1 8 9
M  V30 9 1 8 10
M  V30 10 1 8 11
M  V30 11 1 9 12
M  V30 12 1 10 13
M  V30 13 1 11 14
M  V30 14 2 12 15
M  V30 15 1 16 12 CFG=1
M  V30 16 1 16 17
M  V30 17 1 16 18
M  V30 18 1 17 19
M  V30 19 1 18 20
M  V30 20 2 19 21
M  V30 21 1 19 22
M  V30 22 1 6 7
M  V30 23 1 13 14
M  V30 24 1 20 22
M  V30 END BOND
M  V30 BEGIN COLLECTION
M  V30 MDLV30/STERAC1 ATOMS=(1 16)
M  V30 END COLLECTION
M  V30 END CTAB
M  END
>  <ID>
ZINC000152403867

>  <name>
NA

>  <smiles>
Clc1cccc(c1)C1(CCCC1)NC(=O)C1CCNC(=O)C1

$$$$
ZINC001364693428
Actelion Java MolfileCreator 2.0

  0  0  0  0  0  0              0 V3000
M  V30 BEGIN CTAB
M  V30 COUNTS 22 24 0 0 0
M  V30 BEGIN ATOM
M  V30 1 O 6.9282 -0.5 0.0 0
M  V30 2 C 6.0621 0.0 0.0 0
M  V30 3 N 6.0621 0.9999 0.0 0
M  V30 4 C 5.1961 -0.4999 0.0 0
M  V30 5 N 6.8053 1.6691 0.0 0
M  V30 6 C 5.1961 1.4999 0.0 0
M  V30 7 C 4.3301 0.0 0.0 0
M  V30 8 C 6.3985 2.5826 0.0 0
M  V30 9 N 5.404 2.4781 0.0 0
M  V30 10 N 4.3301 1.0 0.0 0
M  V30 11 C 3.4641 -0.5 0.0 0
M  V30 12 N 6.8985 3.4487 0.0 0
M  V30 13 N 2.598 0.0 0.0 0
M  V30 14 C 1.732 -0.5 0.0 0 CFG=2
M  V30 15 C 1.732 -1.5 0.0 0
M  V30 16 C 0.866 0.0 0.0 0
M  V30 17 C 0.866 -1.9999 0.0 0
M  V30 18 C 2.598 -2.0 0.0 0
M  V30 19 O 0.0 -0.5 0.0 0
M  V30 20 C 0.866 -2.9999 0.0 0
M  V30 21 C 2.598 -3.0 0.0 0
M  V30 22 O 1.732 -3.5 0.0 0
M  V30 END ATOM
M  V30 BEGIN BOND
M  V30 1 2 1 2
M  V30 2 1 2 3
M  V30 3 1 2 4
M  V30 4 1 3 5
M  V30 5 1 3 6
M  V30 6 2 4 7
M  V30 7 1 5 8
M  V30 8 2 6 9
M  V30 9 1 6 10
M  V30 10 1 7 11
M  V30 11 2 8 12
M  V30 12 1 11 13
M  V30 13 1 14 13 CFG=3
M  V30 14 1 14 15
M  V30 15 1 14 16
M  V30 16 1 15 17
M  V30 17 1 15 18
M  V30 18 1 16 19
M  V30 19 1 17 20
M  V30 20 1 18 21
M  V30 21 1 20 22
M  V30 22 1 7 10
M  V30 23 1 8 9
M  V30 24 1 21 22
M  V30 END BOND
M  V30 BEGIN COLLECTION
M  V30 MDLV30/STERAC1 ATOMS=(1 14)
M  V30 END COLLECTION
M  V30 END CTAB
M  END
>  <ID>
ZINC001364693428

>  <name>
NA

>  <smiles>
OCC(NCc1cc(=O)n2[nH]c(=N)nc2[nH]1)C1CCOCC1

$$$$
ZINC000541719916
Actelion Java MolfileCreator 2.0

  0  0  0  0  0  0              0 V3000
M  V30 BEGIN CTAB
M  V30 COUNTS 25 27 0 0 0
M  V30 BEGIN ATOM
M  V30 1 F -0.1046 -2.4972 0.0 0
M  V30 2 C 0.7863 -2.0432 0.0 0
M  V30 3 C 0.8386 -1.0446 0.0 0
M  V30 4 C 1.625 -2.5879 0.0 0
M  V30 5 C 1.7296 -0.5906 0.0 0
M  V30 6 C 0.0 -0.5 0.0 0
M  V30 7 C 2.516 -2.1339 0.0 0
M  V30 8 C 2.5683 -1.1352 0.0 0
M  V30 9 N 0.866 0.0 0.0 0
M  V30 10 C -0.9135 -0.0932 0.0 0
M  V30 11 C -0.1045 -1.4945 0.0 0
M  V30 12 F 3.3546 -2.6785 0.0 0
M  V30 13 C 0.866 0.9999 0.0 0
M  V30 14 C -1.5826 -0.8364 0.0 0
M  V30 15 C -1.0826 -1.7024 0.0 0
M  V30 16 O 1.732 1.4999 0.0 0
M  V30 17 C 0.0 1.5 0.0 0
M  V30 18 C 0.0 2.5 0.0 0
M  V30 19 C -0.866 1.0 0.0 0
M  V30 20 C -0.866 3.0 0.0 0
M  V30 21 C -1.732 1.5 0.0 0
M  V30 22 O -0.866 4.0 0.0 0
M  V30 23 N -1.732 2.5 0.0 0
M  V30 24 C -2.598 1.0 0.0 0
M  V30 25 C -2.598 0.0 0.0 0
M  V30 END ATOM
M  V30 BEGIN BOND
M  V30 1 1 1 2
M  V30 2 2 2 3
M  V30 3 1 2 4
M  V30 4 1 3 5
M  V30 5 1 3 6
M  V30 6 2 4 7
M  V30 7 2 5 8
M  V30 8 1 6 9
M  V30 9 1 6 10
M  V30 10 1 6 11
M  V30 11 1 7 12
M  V30 12 1 9 13
M  V30 13 1 10 14
M  V30 14 1 11 15
M  V30 15 2 13 16
M  V30 16 1 13 17
M  V30 17 1 17 18
M  V30 18 1 17 19
M  V30 19 1 18 20
M  V30 20 1 19 21
M  V30 21 2 20 22
M  V30 22 1 20 23
M  V30 23 1 21 24
M  V30 24 1 24 25
M  V30 25 1 7 8
M  V30 26 1 14 15
M  V30 27 1 21 23
M  V30 END BOND
M  V30 END CTAB
M  END
>  <ID>
ZINC000541719916

>  <name>
NA

>  <smiles>
CCC1CC(CC(=O)N1)C(=O)NC1(CCCC1)c1ccc(F)cc1F

$$$$
ZINC000345816000
Actelion Java MolfileCreator 2.0

  0  0  0  0  0  0              0 V3000
M  V30 BEGIN CTAB
M  V30 COUNTS 24 26 0 0 0
M  V30 BEGIN ATOM
M  V30 1 F 5.1961 1.4999 0.0 0
M  V30 2 C 6.0621 1.0 0.0 0
M  V30 3 C 6.0621 0.0 0.0 0
M  V30 4 C 6.9282 1.5 0.0 0
M  V30 5 N 5.1961 -0.5 0.0 0
M  V30 6 C 6.9282 -0.4999 0.0 0
M  V30 7 C 7.7942 1.0 0.0 0
M  V30 8 N 4.3301 0.0 0.0 0
M  V30 9 C 5.1961 -1.4999 0.0 0
M  V30 10 C 7.7942 0.0 0.0 0
M  V30 11 C 3.4641 -0.5 0.0 0
M  V30 12 O 6.0621 -1.9999 0.0 0
M  V30 13 C 4.3301 -1.9999 0.0 0
M  V30 14 C 2.598 0.0 0.0 0
M  V30 15 C 3.4641 -1.4999 0.0 0
M  V30 16 O 2.598 1.0 0.0 0
M  V30 17 N 1.732 -0.5 0.0 0
M  V30 18 C 0.866 0.0 0.0 0
M  V30 19 C 1.732 -1.5 0.0 0
M  V30 20 C 0.0 -0.5 0.0 0
M  V30 21 N -0.9135 -0.0932 0.0 0
M  V30 22 C -0.1045 -1.4945 0.0 0
M  V30 23 C -1.5826 -0.8364 0.0 0
M  V30 24 C -1.0826 -1.7024 0.0 0
M  V30 END ATOM
M  V30 BEGIN BOND
M  V30 1 1 1 2
M  V30 2 2 2 3
M  V30 3 1 2 4
M  V30 4 1 3 5
M  V30 5 1 3 6
M  V30 6 2 4 7
M  V30 7 1 5 8
M  V30 8 1 5 9
M  V30 9 2 6 10
M  V30 10 2 8 11
M  V30 11 2 9 12
M  V30 12 1 9 13
M  V30 13 1 11 14
M  V30 14 1 11 15
M  V30 15 2 14 16
M  V30 16 1 14 17
M  V30 17 1 17 18
M  V30 18 1 17 19
M  V30 19 1 18 20
M  V30 20 1 20 21
M  V30 21 2 20 22
M  V30 22 1 21 23
M  V30 23 1 22 24
M  V30 24 1 7 10
M  V30 25 2 13 15
M  V30 26 2 23 24
M  V30 END BOND
M  V30 END CTAB
M  END
>  <ID>
ZINC000345816000

>  <name>
NA

>  <smiles>
CN(Cc1ccc[nH]1)C(=O)c1ccc(=O)n(n1)-c1ccccc1F

$$$$
ZINC001378348146
Actelion Java MolfileCreator 2.0

  0  0  0  0  0  0              0 V3000
M  V30 BEGIN CTAB
M  V30 COUNTS 25 27 0 0 0
M  V30 BEGIN ATOM
M  V30 1 O 3.5385 -7.6947 0.0 0
M  V30 2 C 3.617 -6.1967 0.0 0
M  V30 3 N 4.9535 -5.5157 0.0 0
M  V30 4 C 2.359 -5.3798 0.0 0
M  V30 5 C 5.032 -4.0178 0.0 0
M  V30 6 C 2.4375 -3.8818 0.0 0 CFG=2
M  V30 7 C 3.774 -3.2008 0.0 0
M  V30 8 C 1.1795 -3.0649 0.0 0
M  V30 9 O -0.157 -3.7458 0.0 0
M  V30 10 N 1.258 -1.5669 0.0 0
M  V30 11 C 0.0 -0.75 0.0 0
M  V30 12 C -1.3703 -0.1398 0.0 0
M  V30 13 C -0.1567 -2.2417 0.0 0
M  V30 14 C 1.299 0.0 0.0 0
M  V30 15 C -2.374 -1.2546 0.0 0
M  V30 16 C -1.624 -2.5536 0.0 0
M  V30 17 N 2.598 -0.75 0.0 0
M  V30 18 C 3.8971 0.0 0.0 0
M  V30 19 C 5.1961 -0.75 0.0 0
M  V30 20 C 5.1961 -2.25 0.0 0
M  V30 21 C 6.4951 0.0 0.0 0
M  V30 22 N 6.4951 -3.0 0.0 0
M  V30 23 C 7.7942 -0.75 0.0 0
M  V30 24 C 7.7942 -2.25 0.0 0
M  V30 25 C 9.0932 0.0 0.0 0
M  V30 END ATOM
M  V30 BEGIN BOND
M  V30 1 2 1 2
M  V30 2 1 2 3
M  V30 3 1 2 4
M  V30 4 1 3 5
M  V30 5 1 6 4
M  V30 6 1 5 7
M  V30 7 1 6 8 CFG=1
M  V30 8 2 8 9
M  V30 9 1 8 10
M  V30 10 1 10 11
M  V30 11 1 11 12
M  V30 12 1 11 13
M  V30 13 1 11 14
M  V30 14 1 12 15
M  V30 15 1 13 16
M  V30 16 1 14 17
M  V30 17 1 17 18
M  V30 18 1 18 19
M  V30 19 2 19 20
M  V30 20 1 19 21
M  V30 21 1 20 22
M  V30 22 2 21 23
M  V30 23 2 22 24
M  V30 24 1 23 25
M  V30 25 1 6 7
M  V30 26 1 15 16
M  V30 27 1 23 24
M  V30 END BOND
M  V30 BEGIN COLLECTION
M  V30 MDLV30/STERAC1 ATOMS=(1 6)
M  V30 END COLLECTION
M  V30 END CTAB
M  END
>  <ID>
ZINC001378348146

>  <name>
NA

>  <smiles>
Cc1cncc(CNCC2(CCCC2)NC(=O)C2CCNC(=O)C2)c1

$$$$
ZINC000337959876
Actelion Java MolfileCreator 2.0

  0  0  0  0  0  0              0 V3000
M  V30 BEGIN CTAB
M  V30 COUNTS 25 28 0 0 0
M  V30 BEGIN ATOM
M  V30 1 O 9.0932 -3.0 0.0 0
M  V30 2 C 7.7942 -2.2499 0.0 0
M  V30 3 N 7.7942 -0.75 0.0 0
M  V30 4 C 6.4951 -2.9999 0.0 0
M  V30 5 C 6.4951 0.0 0.0 0
M  V30 6 C 5.1961 -2.25 0.0 0
M  V30 7 C 5.1961 -0.75 0.0 0 CFG=2
M  V30 8 N 3.8971 0.0 0.0 0
M  V30 9 C 2.598 -0.75 0.0 0
M  V30 10 O 2.598 -2.25 0.0 0
M  V30 11 N 1.299 0.0 0.0 0
M  V30 12 C 0.0 -0.75 0.0 0
M  V30 13 N -1.3703 -0.1398 0.0 0
M  V30 14 C -0.1567 -2.2417 0.0 0
M  V30 15 N -2.374 -1.2546 0.0 0
M  V30 16 C -1.6821 1.3273 0.0 0
M  V30 17 C -1.624 -2.5536 0.0 0
M  V30 18 C -0.5674 2.331 0.0 0
M  V30 19 C -3.1087 1.7908 0.0 0
M  V30 20 C -2.2341 -3.9239 0.0 0
M  V30 21 C -0.8793 3.7982 0.0 0
M  V30 22 C -3.4206 3.258 0.0 0
M  V30 23 C -3.4476 -4.8056 0.0 0
M  V30 24 C -2.0773 -5.4157 0.0 0
M  V30 25 C -2.3059 4.2617 0.0 0
M  V30 END ATOM
M  V30 BEGIN BOND
M  V30 1 2 1 2
M  V30 2 1 2 3
M  V30 3 1 2 4
M  V30 4 1 3 5
M  V30 5 1 4 6
M  V30 6 1 7 5
M  V30 7 1 7 8 CFG=3
M  V30 8 1 8 9
M  V30 9 2 9 10
M  V30 10 1 9 11
M  V30 11 2 11 12 CFG=2
M  V30 12 1 12 13
M  V30 13 1 12 14
M  V30 14 1 13 15
M  V30 15 1 13 16
M  V30 16 2 14 17
M  V30 17 2 16 18
M  V30 18 1 16 19
M  V30 19 1 17 20
M  V30 20 1 18 21
M  V30 21 2 19 22
M  V30 22 1 20 23
M  V30 23 1 20 24
M  V30 24 2 21 25
M  V30 25 1 6 7
M  V30 26 1 15 17
M  V30 27 1 22 25
M  V30 28 1 23 24
M  V30 END BOND
M  V30 BEGIN COLLECTION
M  V30 MDLV30/STERAC1 ATOMS=(1 7)
M  V30 END COLLECTION
M  V30 END CTAB
M  END
>  <ID>
ZINC000337959876

>  <name>
NA

>  <smiles>
O=C(NC1CCC(=O)NC1)N=c1cc([nH]n1-c1ccccc1)C1CC1

$$$$
ZINC000918664469
Actelion Java MolfileCreator 2.0

  0  0  0  0  0  0              0 V3000
M  V30 BEGIN CTAB
M  V30 COUNTS 25 28 0 0 0
M  V30 BEGIN ATOM
M  V30 1 Br 1.3256 2.7004 0.0 0
M  V30 2 C 0.5323 2.0916 0.0 0
M  V30 3 C 0.6628 1.1002 0.0 0
M  V30 4 C -0.3915 2.4743 0.0 0
M  V30 5 C -0.1305 0.4914 0.0 0
M  V30 6 C -1.1849 1.8655 0.0 0
M  V30 7 C -1.0544 0.8741 0.0 0
M  V30 8 C 0.0 -0.5 0.0 0
M  V30 9 N 0.866 0.0 0.0 0
M  V30 10 C -0.2588 -1.4659 0.0 0
M  V30 11 C -0.9659 -0.2411 0.0 0
M  V30 12 C 1.732 -0.5 0.0 0
M  V30 13 C -1.2247 -1.2071 0.0 0
M  V30 14 O 1.732 -1.5 0.0 0
M  V30 15 C 2.598 0.0 0.0 0
M  V30 16 C 3.4641 -0.5 0.0 0 CFG=2
M  V30 17 O 3.5686 -1.4945 0.0 0
M  V30 18 C 4.3776 -0.0932 0.0 0
M  V30 19 C 4.5467 -1.7024 0.0 0
M  V30 20 C 5.0467 -0.8364 0.0 0
M  V30 21 C 4.6866 0.8577 0.0 0
M  V30 22 O 4.9535 -2.6159 0.0 0
M  V30 23 C 6.0249 -0.6284 0.0 0
M  V30 24 C 5.6648 1.0657 0.0 0
M  V30 25 C 6.3339 0.3225 0.0 0
M  V30 END ATOM
M  V30 BEGIN BOND
M  V30 1 1 1 2
M  V30 2 2 2 3
M  V30 3 1 2 4
M  V30 4 1 3 5
M  V30 5 2 4 6
M  V30 6 2 5 7
M  V30 7 1 5 8
M  V30 8 1 8 9
M  V30 9 1 8 10
M  V30 10 1 8 11
M  V30 11 1 9 12
M  V30 12 1 10 13
M  V30 13 2 12 14
M  V30 14 1 12 15
M  V30 15 1 16 15 CFG=1
M  V30 16 1 16 17
M  V30 17 1 16 18
M  V30 18 1 17 19
M  V30 19 2 18 20
M  V30 20 1 18 21
M  V30 21 2 19 22
M  V30 22 1 20 23
M  V30 23 2 21 24
M  V30 24 2 23 25
M  V30 25 1 6 7
M  V30 26 1 11 13
M  V30 27 1 19 20
M  V30 28 1 24 25
M  V30 END BOND
M  V30 BEGIN COLLECTION
M  V30 MDLV30/STERAC1 ATOMS=(1 16)
M  V30 END COLLECTION
M  V30 END CTAB
M  END
>  <ID>
ZINC000918664469

>  <name>
NA

>  <smiles>
Brc1cccc(c1)C1(CCC1)NC(=O)CC1OC(=O)c2ccccc12

$$$$
ZINC001308174148
Actelion Java MolfileCreator 2.0

  0  0  0  0  0  0              0 V3000
M  V30 BEGIN CTAB
M  V30 COUNTS 25 28 0 0 0
M  V30 BEGIN ATOM
M  V30 1 O 2.598 -3.0 0.0 0
M  V30 2 C 2.598 -1.9999 0.0 0
M  V30 3 N 3.4641 -1.4999 0.0 0
M  V30 4 C 1.732 -1.4999 0.0 0
M  V30 5 N 4.4151 -1.809 0.0 0
M  V30 6 C 3.4641 -0.4999 0.0 0
M  V30 7 C 1.732 -0.5 0.0 0
M  V30 8 C 5.0029 -0.9999 0.0 0
M  V30 9 N 4.4151 -0.1909 0.0 0
M  V30 10 N 2.598 0.0 0.0 0
M  V30 11 C 0.866 0.0 0.0 0
M  V30 12 N 6.0029 -0.9999 0.0 0
M  V30 13 N 0.0 -0.5 0.0 0
M  V30 14 C -0.866 0.0 0.0 0
M  V30 15 C 0.0 -1.4999 0.0 0
M  V30 16 C -1.732 -0.4999 0.0 0
M  V30 17 C -0.866 -1.9999 0.0 0
M  V30 18 C -1.732 -1.4999 0.0 0
M  V30 19 C -2.598 0.0 0.0 0
M  V30 20 C -2.598 -1.9999 0.0 0
M  V30 21 C -3.4641 -0.4999 0.0 0
M  V30 22 C -3.4641 -1.4999 0.0 0
M  V30 23 C -4.3301 -1.9999 0.0 0
M  V30 24 C -5.1961 -1.4999 0.0 0
M  V30 25 C -4.3301 -2.9999 0.0 0
M  V30 END ATOM
M  V30 BEGIN BOND
M  V30 1 2 1 2
M  V30 2 1 2 3
M  V30 3 1 2 4
M  V30 4 1 3 5
M  V30 5 1 3 6
M  V30 6 2 4 7
M  V30 7 1 5 8
M  V30 8 2 6 9
M  V30 9 1 6 10
M  V30 10 1 7 11
M  V30 11 2 8 12
M  V30 12 1 11 13
M  V30 13 1 13 14
M  V30 14 1 13 15
M  V30 15 1 14 16
M  V30 16 1 15 17
M  V30 17 2 16 18
M  V30 18 1 16 19
M  V30 19 1 18 20
M  V30 20 2 19 21
M  V30 21 2 20 22
M  V30 22 1 22 23
M  V30 23 1 23 24
M  V30 24 1 23 25
M  V30 25 1 7 10
M  V30 26 1 8 9
M  V30 27 1 17 18
M  V30 28 1 21 22
M  V30 END BOND
M  V30 END CTAB
M  END
>  <ID>
ZINC001308174148

>  <name>
NA

>  <smiles>
CC(C)c1ccc2CN(Cc3cc(=O)n4[nH]c(=N)nc4[nH]3)CCc2c1

$$$$
ZINC000265317652
Actelion Java MolfileCreator 2.0

  0  0  0  0  0  0              0 V3000
M  V30 BEGIN CTAB
M  V30 COUNTS 24 27 0 0 0
M  V30 BEGIN ATOM
M  V30 1 S 0.8922 1.7696 0.0 0
M  V30 2 C -0.1957 0.7371 0.0 0
M  V30 3 C 0.2465 3.1235 0.0 0
M  V30 4 N -1.514 1.4529 0.0 0
M  V30 5 C 0.0 -0.75 0.0 0
M  V30 6 C -1.2406 2.9277 0.0 0
M  V30 7 N 1.299 0.0 0.0 0
M  V30 8 C -0.3882 -2.1988 0.0 0
M  V30 9 C -1.4488 -0.3617 0.0 0
M  V30 10 C -2.2731 4.0158 0.0 0
M  V30 11 C 2.598 -0.75 0.0 0
M  V30 12 C -1.8371 -1.8106 0.0 0
M  V30 13 O 2.598 -2.25 0.0 0
M  V30 14 C 3.8971 0.0 0.0 0
M  V30 15 C 5.1961 -0.75 0.0 0 CFG=2
M  V30 16 O 5.3529 -2.2417 0.0 0
M  V30 17 C 6.5664 -0.1398 0.0 0
M  V30 18 C 6.8201 -2.5536 0.0 0
M  V30 19 C 7.5701 -1.2546 0.0 0
M  V30 20 C 7.0299 1.2866 0.0 0
M  V30 21 O 7.4302 -3.9239 0.0 0
M  V30 22 C 9.0373 -0.9427 0.0 0
M  V30 23 C 8.4972 1.5985 0.0 0
M  V30 24 C 9.5009 0.4838 0.0 0
M  V30 END ATOM
M  V30 BEGIN BOND
M  V30 1 1 1 2
M  V30 2 1 1 3
M  V30 3 2 2 4
M  V30 4 1 2 5
M  V30 5 2 3 6
M  V30 6 1 5 7
M  V30 7 1 5 8
M  V30 8 1 5 9
M  V30 9 1 6 10
M  V30 10 1 7 11
M  V30 11 1 8 12
M  V30 12 2 11 13
M  V30 13 1 11 14
M  V30 14 1 15 14 CFG=1
M  V30 15 1 15 16
M  V30 16 1 15 17
M  V30 17 1 16 18
M  V30 18 2 17 19
M  V30 19 1 17 20
M  V30 20 2 18 21
M  V30 21 1 19 22
M  V30 22 2 20 23
M  V30 23 2 22 24
M  V30 24 1 4 6
M  V30 25 1 9 12
M  V30 26 1 18 19
M  V30 27 1 23 24
M  V30 END BOND
M  V30 BEGIN COLLECTION
M  V30 MDLV30/STERAC1 ATOMS=(1 15)
M  V30 END COLLECTION
M  V30 END CTAB
M  END
>  <ID>
ZINC000265317652

>  <name>
NA

>  <smiles>
Cc1csc(n1)C1(CCC1)NC(=O)CC1OC(=O)c2ccccc12

$$$$
ZINC000832831149
Actelion Java MolfileCreator 2.0

  0  0  0  0  0  0              0 V3000
M  V30 BEGIN CTAB
M  V30 COUNTS 21 23 0 0 0
M  V30 BEGIN ATOM
M  V30 1 S 3.5116 -0.4067 0.0 0
M  V30 2 C 4.1807 0.3364 0.0 0
M  V30 3 C 2.598 0.0 0.0 0
M  V30 4 N 5.1752 0.2318 0.0 0
M  V30 5 N 3.6807 1.2024 0.0 0
M  V30 6 C 2.7026 0.9945 0.0 0
M  V30 7 C 1.732 -0.5 0.0 0
M  V30 8 O 1.9594 1.6636 0.0 0
M  V30 9 C 0.866 0.0 0.0 0
M  V30 10 O 0.866 1.0 0.0 0
M  V30 11 N 0.0 -0.5 0.0 0
M  V30 12 C -0.9135 -0.0932 0.0 0
M  V30 13 C -0.1045 -1.4945 0.0 0
M  V30 14 C -1.1214 0.8848 0.0 0
M  V30 15 C -1.5826 -0.8364 0.0 0
M  V30 16 C -1.0826 -1.7024 0.0 0
M  V30 17 O -0.3783 1.554 0.0 0
M  V30 18 N -2.0725 1.1939 0.0 0
M  V30 19 C -2.5608 -1.0443 0.0 0
M  V30 20 C -1.7518 -2.4455 0.0 0
M  V30 21 C -2.6653 -2.0388 0.0 0
M  V30 END ATOM
M  V30 BEGIN BOND
M  V30 1 1 1 2
M  V30 2 1 1 3
M  V30 3 2 2 4
M  V30 4 1 2 5
M  V30 5 2 3 6
M  V30 6 1 3 7
M  V30 7 1 6 8
M  V30 8 1 7 9
M  V30 9 2 9 10
M  V30 10 1 9 11
M  V30 11 1 11 12
M  V30 12 1 11 13
M  V30 13 1 12 14
M  V30 14 1 12 15
M  V30 15 1 13 16
M  V30 16 2 14 17
M  V30 17 1 14 18
M  V30 18 1 15 19
M  V30 19 1 16 20
M  V30 20 1 19 21
M  V30 21 1 5 6
M  V30 22 1 15 16
M  V30 23 1 20 21
M  V30 END BOND
M  V30 END CTAB
M  END
>  <ID>
ZINC000832831149

>  <name>
NA

>  <smiles>
NC(=O)C1C2CCCC2CN1C(=O)Cc1sc(=N)[nH]c1O

$$$$
ZINC001645510569
Actelion Java MolfileCreator 2.0

  0  0  0  0  0  0              0 V3000
M  V30 BEGIN CTAB
M  V30 COUNTS 25 27 0 0 0
M  V30 BEGIN ATOM
M  V30 1 F 9.0932 -3.0 0.0 0
M  V30 2 C 7.7942 -2.25 0.0 0
M  V30 3 C 7.7942 -0.75 0.0 0
M  V30 4 C 6.4951 -2.9999 0.0 0
M  V30 5 C 6.4951 0.0 0.0 0
M  V30 6 C 5.1961 -2.25 0.0 0
M  V30 7 C 5.1961 -0.75 0.0 0
M  V30 8 C 3.8971 0.0 0.0 0 CFG=1
M  V30 9 N 2.598 -0.75 0.0 0
M  V30 10 C 3.8971 1.5 0.0 0
M  V30 11 C 1.299 0.0 0.0 0
M  V30 12 F 2.3971 1.5 0.0 0
M  V30 13 F 3.8971 3.0 0.0 0
M  V30 14 F 5.3971 1.5 0.0 0
M  V30 15 C 0.0 -0.75 0.0 0
M  V30 16 N -1.299 0.0 0.0 0
M  V30 17 C 0.0 -2.2499 0.0 0
M  V30 18 C -2.598 -0.7499 0.0 0
M  V30 19 C -1.299 -2.9999 0.0 0
M  V30 20 N -4.0246 -0.2864 0.0 0
M  V30 21 N -2.598 -2.2499 0.0 0
M  V30 22 O -1.299 -4.5 0.0 0
M  V30 23 C -4.9063 -1.4999 0.0 0
M  V30 24 N -4.0246 -2.7135 0.0 0
M  V30 25 N -6.4063 -1.4999 0.0 0
M  V30 END ATOM
M  V30 BEGIN BOND
M  V30 1 1 1 2
M  V30 2 2 2 3
M  V30 3 1 2 4
M  V30 4 1 3 5
M  V30 5 2 4 6
M  V30 6 2 5 7
M  V30 7 1 8 7
M  V30 8 1 8 9 CFG=1
M  V30 9 1 8 10
M  V30 10 1 9 11
M  V30 11 1 10 12
M  V30 12 1 10 13
M  V30 13 1 10 14
M  V30 14 1 11 15
M  V30 15 1 15 16
M  V30 16 2 15 17
M  V30 17 1 16 18
M  V30 18 1 17 19
M  V30 19 2 18 20
M  V30 20 1 18 21
M  V30 21 2 19 22
M  V30 22 1 20 23
M  V30 23 1 21 24
M  V30 24 2 23 25
M  V30 25 1 6 7
M  V30 26 1 19 21
M  V30 27 1 23 24
M  V30 END BOND
M  V30 BEGIN COLLECTION
M  V30 MDLV30/STERAC1 ATOMS=(1 8)
M  V30 END COLLECTION
M  V30 END CTAB
M  END
>  <ID>
ZINC001645510569

>  <name>
NA

>  <smiles>
Fc1ccc(cc1)C(NCc1cc(=O)n2[nH]c(=N)nc2[nH]1)C(F)(F)F

$$$$
ZINC000544493853
Actelion Java MolfileCreator 2.0

  0  0  0  0  0  0              0 V3000
M  V30 BEGIN CTAB
M  V30 COUNTS 24 26 0 0 0
M  V30 BEGIN ATOM
M  V30 1 Br -0.314 5.2417 0.0 0
M  V30 2 C -0.2355 3.7438 0.0 0
M  V30 3 C 1.1009 3.0628 0.0 0
M  V30 4 C -1.4935 2.9268 0.0 0
M  V30 5 C 1.1795 1.5649 0.0 0
M  V30 6 C -1.415 1.4289 0.0 0
M  V30 7 C -0.0785 0.7479 0.0 0
M  V30 8 C 0.0 -0.75 0.0 0
M  V30 9 N 1.299 0.0 0.0 0
M  V30 10 C -0.1567 -2.2417 0.0 0
M  V30 11 C -1.3703 -0.1398 0.0 0
M  V30 12 C 2.598 -0.75 0.0 0
M  V30 13 C -1.624 -2.5536 0.0 0
M  V30 14 C -2.374 -1.2546 0.0 0
M  V30 15 O 3.8971 0.0 0.0 0
M  V30 16 C 2.598 -2.25 0.0 0
M  V30 17 C 1.299 -3.0 0.0 0
M  V30 18 C 3.8971 -2.9999 0.0 0
M  V30 19 C 1.299 -4.5 0.0 0
M  V30 20 C 3.8971 -4.4999 0.0 0
M  V30 21 O 0.0 -5.25 0.0 0
M  V30 22 N 2.598 -5.25 0.0 0
M  V30 23 C 5.1961 -5.2499 0.0 0
M  V30 24 C 6.4951 -4.4999 0.0 0
M  V30 END ATOM
M  V30 BEGIN BOND
M  V30 1 1 1 2
M  V30 2 2 2 3
M  V30 3 1 2 4
M  V30 4 1 3 5
M  V30 5 2 4 6
M  V30 6 2 5 7
M  V30 7 1 7 8
M  V30 8 1 8 9
M  V30 9 1 8 10
M  V30 10 1 8 11
M  V30 11 1 9 12
M  V30 12 1 10 13
M  V30 13 1 11 14
M  V30 14 2 12 15
M  V30 15 1 12 16
M  V30 16 1 16 17
M  V30 17 1 16 18
M  V30 18 1 17 19
M  V30 19 1 18 20
M  V30 20 2 19 21
M  V30 21 1 19 22
M  V30 22 1 20 23
M  V30 23 1 23 24
M  V30 24 1 6 7
M  V30 25 1 13 14
M  V30 26 1 20 22
M  V30 END BOND
M  V30 END CTAB
M  END
>  <ID>
ZINC000544493853

>  <name>
NA

>  <smiles>
CCC1CC(CC(=O)N1)C(=O)NC1(CCCC1)c1ccc(Br)cc1

$$$$
ZINC000554742504
Actelion Java MolfileCreator 2.0

  0  0  0  0  0  0              0 V3000
M  V30 BEGIN CTAB
M  V30 COUNTS 25 26 0 0 0
M  V30 BEGIN ATOM
M  V30 1 F 3.4641 -4.5 0.0 0
M  V30 2 C 3.4641 -3.5 0.0 0
M  V30 3 C 4.3301 -3.0 0.0 0
M  V30 4 C 2.598 -3.0 0.0 0
M  V30 5 C 4.3301 -1.9999 0.0 0
M  V30 6 C 2.598 -2.0 0.0 0
M  V30 7 C 3.4641 -1.5 0.0 0
M  V30 8 N 3.4641 -0.5 0.0 0
M  V30 9 C 4.3301 0.0 0.0 0
M  V30 10 C 2.598 0.0 0.0 0
M  V30 11 O 4.3301 1.0 0.0 0
M  V30 12 C 5.1961 -0.5 0.0 0
M  V30 13 C 1.732 -0.5 0.0 0
M  V30 14 N 6.0621 0.0 0.0 0
M  V30 15 C 0.866 0.0 0.0 0
M  V30 16 C 6.9282 -0.5 0.0 0
M  V30 17 C 6.0621 0.9999 0.0 0
M  V30 18 O 0.866 1.0 0.0 0
M  V30 19 N 0.0 -0.5 0.0 0
M  V30 20 C 7.7942 0.0 0.0 0
M  V30 21 C 6.9282 1.4999 0.0 0
M  V30 22 O 8.6602 -0.5 0.0 0
M  V30 23 C 7.7942 0.9999 0.0 0
M  V30 24 C 8.6602 1.4999 0.0 0
M  V30 25 O 8.6602 2.4999 0.0 0
M  V30 END ATOM
M  V30 BEGIN BOND
M  V30 1 1 1 2
M  V30 2 2 2 3
M  V30 3 1 2 4
M  V30 4 1 3 5
M  V30 5 2 4 6
M  V30 6 2 5 7
M  V30 7 1 7 8
M  V30 8 1 8 9
M  V30 9 1 8 10
M  V30 10 2 9 11
M  V30 11 1 9 12
M  V30 12 1 10 13
M  V30 13 1 12 14
M  V30 14 1 13 15
M  V30 15 1 14 16
M  V30 16 1 14 17
M  V30 17 2 15 18
M  V30 18 1 15 19
M  V30 19 1 16 20
M  V30 20 1 17 21
M  V30 21 1 20 22
M  V30 22 1 20 23
M  V30 23 1 23 24
M  V30 24 1 24 25
M  V30 25 1 6 7
M  V30 26 1 21 23
M  V30 END BOND
M  V30 END CTAB
M  END
>  <ID>
ZINC000554742504

>  <name>
NA

>  <smiles>
NC(=O)CCN(C(=O)CN1CCC(CO)C(O)C1)c1ccc(F)cc1

$$$$
ZINC000454067711
Actelion Java MolfileCreator 2.0

  0  0  0  0  0  0              0 V3000
M  V30 BEGIN CTAB
M  V30 COUNTS 25 26 0 0 0
M  V30 BEGIN ATOM
M  V30 1 O 11.199 -1.0 0.0 0
M  V30 2 C 10.199 -1.0 0.0 0
M  V30 3 N 9.6113 -0.1909 0.0 0
M  V30 4 N 9.6113 -1.809 0.0 0
M  V30 5 C 8.6602 -0.5 0.0 0
M  V30 6 C 9.9203 0.76 0.0 0
M  V30 7 C 8.6602 -1.5 0.0 0
M  V30 8 C 9.9203 -2.76 0.0 0
M  V30 9 C 7.7942 0.0 0.0 0
M  V30 10 C 7.7942 -2.0 0.0 0
M  V30 11 C 6.9282 -0.5 0.0 0
M  V30 12 C 6.9282 -1.4999 0.0 0
M  V30 13 N 6.0621 0.0 0.0 0
M  V30 14 C 5.1961 -0.5 0.0 0
M  V30 15 O 5.1961 -1.4999 0.0 0
M  V30 16 C 4.3301 0.0 0.0 0
M  V30 17 O 4.3301 1.0 0.0 0
M  V30 18 N 3.4641 -0.5 0.0 0
M  V30 19 C 2.598 0.0 0.0 0
M  V30 20 C 1.732 -0.5 0.0 0
M  V30 21 C 2.598 1.0 0.0 0
M  V30 22 O 1.732 -1.5 0.0 0
M  V30 23 C 0.866 0.0 0.0 0
M  V30 24 C 1.732 1.5 0.0 0
M  V30 25 C 0.0 -0.5 0.0 0
M  V30 END ATOM
M  V30 BEGIN BOND
M  V30 1 2 1 2
M  V30 2 1 2 3
M  V30 3 1 2 4
M  V30 4 1 3 5
M  V30 5 1 3 6
M  V30 6 1 4 7
M  V30 7 1 4 8
M  V30 8 1 5 9
M  V30 9 1 7 10
M  V30 10 2 9 11
M  V30 11 2 10 12
M  V30 12 1 11 13
M  V30 13 1 13 14
M  V30 14 2 14 15
M  V30 15 1 14 16
M  V30 16 2 16 17
M  V30 17 1 16 18
M  V30 18 1 18 19
M  V30 19 1 19 20
M  V30 20 1 19 21
M  V30 21 1 20 22
M  V30 22 1 20 23
M  V30 23 1 21 24
M  V30 24 1 23 25
M  V30 25 2 5 7
M  V30 26 1 11 12
M  V30 END BOND
M  V30 END CTAB
M  END
>  <ID>
ZINC000454067711

>  <name>
NA

>  <smiles>
CCC(O)C(CC)NC(=O)C(=O)Nc1ccc2n(C)c(=O)n(C)c2c1

$$$$
ZINC001373841620
Actelion Java MolfileCreator 2.0

  0  0  0  0  0  0              0 V3000
M  V30 BEGIN CTAB
M  V30 COUNTS 23 25 0 0 0
M  V30 BEGIN ATOM
M  V30 1 O 3.5385 -7.6947 0.0 0
M  V30 2 C 3.617 -6.1967 0.0 0
M  V30 3 N 4.9535 -5.5157 0.0 0
M  V30 4 C 2.359 -5.3798 0.0 0
M  V30 5 C 5.032 -4.0178 0.0 0
M  V30 6 C 2.4375 -3.8818 0.0 0 CFG=2
M  V30 7 C 3.774 -3.2008 0.0 0
M  V30 8 C 1.1795 -3.0649 0.0 0
M  V30 9 O -0.157 -3.7458 0.0 0
M  V30 10 N 1.258 -1.5669 0.0 0
M  V30 11 C 0.0 -0.75 0.0 0
M  V30 12 C -1.3703 -0.1398 0.0 0
M  V30 13 C -0.1567 -2.2417 0.0 0
M  V30 14 C 1.299 0.0 0.0 0
M  V30 15 C -2.374 -1.2546 0.0 0
M  V30 16 C -1.624 -2.5536 0.0 0
M  V30 17 N 2.598 -0.75 0.0 0
M  V30 18 C 3.8971 0.0 0.0 0
M  V30 19 C 5.1961 -0.75 0.0 0
M  V30 20 N 5.3529 -2.2417 0.0 0
M  V30 21 C 6.5664 -0.1398 0.0 0
M  V30 22 O 6.8201 -2.5536 0.0 0
M  V30 23 C 7.5701 -1.2546 0.0 0
M  V30 END ATOM
M  V30 BEGIN BOND
M  V30 1 2 1 2
M  V30 2 1 2 3
M  V30 3 1 2 4
M  V30 4 1 3 5
M  V30 5 1 6 4
M  V30 6 1 5 7
M  V30 7 1 6 8 CFG=1
M  V30 8 2 8 9
M  V30 9 1 8 10
M  V30 10 1 10 11
M  V30 11 1 11 12
M  V30 12 1 11 13
M  V30 13 1 11 14
M  V30 14 1 12 15
M  V30 15 1 13 16
M  V30 16 1 14 17
M  V30 17 1 17 18
M  V30 18 1 18 19
M  V30 19 2 19 20
M  V30 20 1 19 21
M  V30 21 1 20 22
M  V30 22 2 21 23
M  V30 23 1 6 7
M  V30 24 1 15 16
M  V30 25 1 22 23
M  V30 END BOND
M  V30 BEGIN COLLECTION
M  V30 MDLV30/STERAC1 ATOMS=(1 6)
M  V30 END COLLECTION
M  V30 END CTAB
M  END
>  <ID>
ZINC001373841620

>  <name>
NA

>  <smiles>
O=C(NC1(CNCc2ccon2)CCCC1)C1CCNC(=O)C1

$$$$
ZINC001160469736
Actelion Java MolfileCreator 2.0

  0  0  0  0  0  0              0 V3000
M  V30 BEGIN CTAB
M  V30 COUNTS 23 25 0 0 0
M  V30 BEGIN ATOM
M  V30 1 O 12.9015 0.7499 0.0 0
M  V30 2 C 11.4015 0.7499 0.0 0
M  V30 3 N 10.5198 1.9635 0.0 0
M  V30 4 N 10.5198 -0.4635 0.0 0
M  V30 5 C 9.0932 1.5 0.0 0
M  V30 6 C 10.9833 3.3901 0.0 0
M  V30 7 C 9.0932 0.0 0.0 0
M  V30 8 C 10.9833 -1.8901 0.0 0
M  V30 9 C 7.7942 2.2499 0.0 0
M  V30 10 C 7.7942 -0.75 0.0 0
M  V30 11 C 6.4951 1.4999 0.0 0
M  V30 12 C 6.4951 0.0 0.0 0
M  V30 13 O 5.1961 2.25 0.0 0
M  V30 14 N 5.1961 -0.75 0.0 0
M  V30 15 C 3.8971 0.0 0.0 0
M  V30 16 O 3.8971 1.5 0.0 0
M  V30 17 C 2.598 -0.75 0.0 0
M  V30 18 C 1.299 0.0 0.0 0
M  V30 19 C 0.0 -0.75 0.0 0 CFG=2
M  V30 20 C -1.3703 -0.1398 0.0 0
M  V30 21 C -0.1567 -2.2417 0.0 0
M  V30 22 O -2.374 -1.2546 0.0 0
M  V30 23 C -1.624 -2.5536 0.0 0
M  V30 END ATOM
M  V30 BEGIN BOND
M  V30 1 2 1 2
M  V30 2 1 2 3
M  V30 3 1 2 4
M  V30 4 1 3 5
M  V30 5 1 3 6
M  V30 6 1 4 7
M  V30 7 1 4 8
M  V30 8 1 5 9
M  V30 9 1 7 10
M  V30 10 2 9 11
M  V30 11 2 10 12
M  V30 12 1 11 13
M  V30 13 1 12 14
M  V30 14 1 14 15
M  V30 15 2 15 16
M  V30 16 1 15 17
M  V30 17 2 17 18 CFG=2
M  V30 18 1 19 18 CFG=1
M  V30 19 1 19 20
M  V30 20 1 19 21
M  V30 21 1 20 22
M  V30 22 1 21 23
M  V30 23 2 5 7
M  V30 24 1 11 12
M  V30 25 1 22 23
M  V30 END BOND
M  V30 BEGIN COLLECTION
M  V30 MDLV30/STERAC1 ATOMS=(1 19)
M  V30 END COLLECTION
M  V30 END CTAB
M  END
>  <ID>
ZINC001160469736

>  <name>
NA

>  <smiles>
Cn1c2cc(O)c(NC(=O)C=CC3CCOC3)cc2n(C)c1=O

$$$$
ZINC000795519119
Actelion Java MolfileCreator 2.0

  0  0  0  0  0  0              0 V3000
M  V30 BEGIN CTAB
M  V30 COUNTS 25 27 0 0 0
M  V30 BEGIN ATOM
M  V30 1 F 7.312 0.5304 0.0 0
M  V30 2 C 6.3339 0.3225 0.0 0
M  V30 3 C 6.0249 -0.6284 0.0 0
M  V30 4 C 5.6648 1.0657 0.0 0
M  V30 5 C 5.0467 -0.8364 0.0 0
M  V30 6 C 4.6866 0.8577 0.0 0
M  V30 7 C 4.3776 -0.0932 0.0 0
M  V30 8 C 4.5467 -1.7024 0.0 0
M  V30 9 C 3.4641 -0.5 0.0 0
M  V30 10 C 3.5686 -1.4945 0.0 0
M  V30 11 N 2.598 0.0 0.0 0
M  V30 12 C 1.732 -0.5 0.0 0
M  V30 13 O 1.732 -1.5 0.0 0
M  V30 14 C 0.866 0.0 0.0 0
M  V30 15 O 0.866 1.0 0.0 0
M  V30 16 C 0.0 -0.5 0.0 0
M  V30 17 C -0.866 0.0 0.0 0
M  V30 18 C 0.0 -1.4999 0.0 0
M  V30 19 C -1.732 -0.4999 0.0 0
M  V30 20 C -0.866 -1.9999 0.0 0
M  V30 21 C -1.732 -1.4999 0.0 0
M  V30 22 C -2.598 0.0 0.0 0
M  V30 23 F -3.098 -0.866 0.0 0
M  V30 24 F -3.4641 0.5 0.0 0
M  V30 25 F -2.098 0.866 0.0 0
M  V30 END ATOM
M  V30 BEGIN BOND
M  V30 1 1 1 2
M  V30 2 2 2 3
M  V30 3 1 2 4
M  V30 4 1 3 5
M  V30 5 2 4 6
M  V30 6 2 5 7
M  V30 7 1 5 8
M  V30 8 1 7 9
M  V30 9 1 8 10
M  V30 10 1 9 11
M  V30 11 1 11 12
M  V30 12 2 12 13
M  V30 13 1 12 14
M  V30 14 1 14 15
M  V30 15 1 14 16
M  V30 16 2 16 17
M  V30 17 1 16 18
M  V30 18 1 17 19
M  V30 19 2 18 20
M  V30 20 2 19 21
M  V30 21 1 19 22
M  V30 22 1 22 23
M  V30 23 1 22 24
M  V30 24 1 22 25
M  V30 25 1 6 7
M  V30 26 1 9 10
M  V30 27 1 20 21
M  V30 END BOND
M  V30 END CTAB
M  END
>  <ID>
ZINC000795519119

>  <name>
NA

>  <smiles>
OC(C(=O)NC1CCc2cc(F)ccc12)c1cccc(c1)C(F)(F)F

$$$$
ZINC001413119954
Actelion Java MolfileCreator 2.0

  0  0  0  0  0  0              0 V3000
M  V30 BEGIN CTAB
M  V30 COUNTS 25 26 0 0 0
M  V30 BEGIN ATOM
M  V30 1 O 6.9282 -0.5 0.0 0
M  V30 2 C 6.0621 0.0 0.0 0
M  V30 3 O 5.1961 -0.5 0.0 0
M  V30 4 N 6.0621 0.9999 0.0 0
M  V30 5 C 4.3301 0.0 0.0 0
M  V30 6 C 3.4641 -0.5 0.0 0 CFG=1
M  V30 7 N 2.598 0.0 0.0 0
M  V30 8 C 3.4641 -1.5 0.0 0
M  V30 9 C 1.732 -0.5 0.0 0
M  V30 10 C 4.3301 -2.0 0.0 0
M  V30 11 O 1.732 -1.5 0.0 0
M  V30 12 C 0.866 0.0 0.0 0
M  V30 13 C 4.3301 -3.0 0.0 0
M  V30 14 C 5.1961 -1.5 0.0 0
M  V30 15 N 0.0 -0.5 0.0 0
M  V30 16 C 5.1961 -3.5 0.0 0
M  V30 17 C 6.0621 -2.0 0.0 0
M  V30 18 C -0.866 0.0 0.0 0
M  V30 19 C 0.0 -1.4999 0.0 0
M  V30 20 C 6.0621 -3.0 0.0 0
M  V30 21 C -1.732 -0.4999 0.0 0
M  V30 22 C -0.866 -1.9999 0.0 0
M  V30 23 C -1.732 -1.4999 0.0 0
M  V30 24 C -2.598 -1.9999 0.0 0
M  V30 25 O -2.598 -2.9999 0.0 0
M  V30 END ATOM
M  V30 BEGIN BOND
M  V30 1 2 1 2
M  V30 2 1 2 3
M  V30 3 1 2 4
M  V30 4 1 3 5
M  V30 5 1 6 5
M  V30 6 1 6 7 CFG=3
M  V30 7 1 6 8
M  V30 8 1 7 9
M  V30 9 1 8 10
M  V30 10 2 9 11
M  V30 11 1 9 12
M  V30 12 2 10 13
M  V30 13 1 10 14
M  V30 14 1 12 15
M  V30 15 1 13 16
M  V30 16 2 14 17
M  V30 17 1 15 18
M  V30 18 1 15 19
M  V30 19 2 16 20
M  V30 20 1 18 21
M  V30 21 1 19 22
M  V30 22 1 21 23
M  V30 23 1 23 24
M  V30 24 1 24 25
M  V30 25 1 17 20
M  V30 26 1 22 23
M  V30 END BOND
M  V30 BEGIN COLLECTION
M  V30 MDLV30/STERAC1 ATOMS=(1 6)
M  V30 END COLLECTION
M  V30 END CTAB
M  END
>  <ID>
ZINC001413119954

>  <name>
NA

>  <smiles>
NC(=O)OCC(Cc1ccccc1)NC(=O)CN1CCC(CO)CC1

$$$$
ZINC000177399587
Actelion Java MolfileCreator 2.0

  0  0  0  0  0  0              0 V3000
M  V30 BEGIN CTAB
M  V30 COUNTS 24 26 0 0 0
M  V30 BEGIN ATOM
M  V30 1 Cl 1.299 4.5 0.0 0
M  V30 2 C 2.598 3.75 0.0 0
M  V30 3 C 2.598 2.25 0.0 0
M  V30 4 C 3.8971 4.5 0.0 0
M  V30 5 C 3.8971 1.5 0.0 0
M  V30 6 C 5.1961 3.75 0.0 0
M  V30 7 C 5.1961 2.25 0.0 0
M  V30 8 C 3.8971 0.0 0.0 0 CFG=1
M  V30 9 N 2.598 -0.75 0.0 0
M  V30 10 C 5.1961 -0.75 0.0 0
M  V30 11 C 3.8971 -1.5 0.0 0
M  V30 12 C 1.299 0.0 0.0 0
M  V30 13 O 6.4951 0.0 0.0 0
M  V30 14 N 5.1961 -2.25 0.0 0
M  V30 15 C 0.0 -0.75 0.0 0
M  V30 16 N 0.0 -2.2499 0.0 0
M  V30 17 C -1.299 0.0 0.0 0
M  V30 18 C -1.299 -2.9999 0.0 0
M  V30 19 C -2.598 -0.7499 0.0 0
M  V30 20 N -2.598 -2.2499 0.0 0
M  V30 21 C -1.6109 -4.4672 0.0 0
M  V30 22 O -3.8971 0.0 0.0 0
M  V30 23 N -3.7127 -3.2536 0.0 0
M  V30 24 C -3.1026 -4.624 0.0 0
M  V30 END ATOM
M  V30 BEGIN BOND
M  V30 1 1 1 2
M  V30 2 2 2 3
M  V30 3 1 2 4
M  V30 4 1 3 5
M  V30 5 2 4 6
M  V30 6 2 5 7
M  V30 7 1 8 5
M  V30 8 1 8 9
M  V30 9 1 8 10
M  V30 10 1 8 11 CFG=1
M  V30 11 1 9 12
M  V30 12 2 10 13
M  V30 13 1 10 14
M  V30 14 1 12 15
M  V30 15 1 15 16
M  V30 16 2 15 17
M  V30 17 2 16 18
M  V30 18 1 17 19
M  V30 19 1 18 20
M  V30 20 1 18 21
M  V30 21 2 19 22
M  V30 22 1 20 23
M  V30 23 2 21 24
M  V30 24 1 6 7
M  V30 25 1 19 20
M  V30 26 1 23 24
M  V30 END BOND
M  V30 BEGIN COLLECTION
M  V30 MDLV30/STERAC1 ATOMS=(1 8)
M  V30 END COLLECTION
M  V30 END CTAB
M  END
>  <ID>
ZINC000177399587

>  <name>
NA

>  <smiles>
CC(NCc1cc(=O)n2[nH]ccc2n1)(C(N)=O)c1cccc(Cl)c1

$$$$
ZINC001375279281
Actelion Java MolfileCreator 2.0

  0  0  0  0  0  0              0 V3000
M  V30 BEGIN CTAB
M  V30 COUNTS 23 24 0 0 0
M  V30 BEGIN ATOM
M  V30 1 O 3.5385 -7.6947 0.0 0
M  V30 2 C 3.617 -6.1967 0.0 0
M  V30 3 N 4.9535 -5.5157 0.0 0
M  V30 4 C 2.359 -5.3798 0.0 0
M  V30 5 C 5.032 -4.0178 0.0 0
M  V30 6 C 2.4375 -3.8818 0.0 0 CFG=2
M  V30 7 C 3.774 -3.2008 0.0 0
M  V30 8 C 1.1795 -3.0649 0.0 0
M  V30 9 O -0.157 -3.7458 0.0 0
M  V30 10 N 1.258 -1.5669 0.0 0
M  V30 11 C 0.0 -0.75 0.0 0
M  V30 12 C -1.3703 -0.1398 0.0 0
M  V30 13 C -0.1567 -2.2417 0.0 0
M  V30 14 C 1.299 0.0 0.0 0
M  V30 15 C -2.374 -1.2546 0.0 0
M  V30 16 C -1.624 -2.5536 0.0 0
M  V30 17 N 2.598 -0.75 0.0 0
M  V30 18 C 3.8971 0.0 0.0 0
M  V30 19 O 5.1961 -0.75 0.0 0
M  V30 20 C 3.8971 1.5 0.0 0
M  V30 21 C 2.3971 1.5 0.0 0
M  V30 22 C 3.8971 3.0 0.0 0
M  V30 23 C 5.3971 1.5 0.0 0
M  V30 END ATOM
M  V30 BEGIN BOND
M  V30 1 2 1 2
M  V30 2 1 2 3
M  V30 3 1 2 4
M  V30 4 1 3 5
M  V30 5 1 6 4
M  V30 6 1 5 7
M  V30 7 1 6 8 CFG=1
M  V30 8 2 8 9
M  V30 9 1 8 10
M  V30 10 1 10 11
M  V30 11 1 11 12
M  V30 12 1 11 13
M  V30 13 1 11 14
M  V30 14 1 12 15
M  V30 15 1 13 16
M  V30 16 1 14 17
M  V30 17 1 17 18
M  V30 18 2 18 19
M  V30 19 1 18 20
M  V30 20 1 20 21
M  V30 21 1 20 22
M  V30 22 1 20 23
M  V30 23 1 6 7
M  V30 24 1 15 16
M  V30 END BOND
M  V30 BEGIN COLLECTION
M  V30 MDLV30/STERAC1 ATOMS=(1 6)
M  V30 END COLLECTION
M  V30 END CTAB
M  END
>  <ID>
ZINC001375279281

>  <name>
NA

>  <smiles>
CC(C)(C)C(=O)NCC1(CCCC1)NC(=O)C1CCNC(=O)C1

$$$$
ZINC001328572432
Actelion Java MolfileCreator 2.0

  0  0  0  0  0  0              0 V3000
M  V30 BEGIN CTAB
M  V30 COUNTS 24 26 0 0 0
M  V30 BEGIN ATOM
M  V30 1 F 5.9461 0.549 0.0 0
M  V30 2 C 5.1961 -0.75 0.0 0
M  V30 3 F 6.4951 -1.5 0.0 0
M  V30 4 F 4.4461 -2.049 0.0 0
M  V30 5 C 3.8971 0.0 0.0 0 CFG=2
M  V30 6 N 2.598 -0.75 0.0 0
M  V30 7 C 3.8971 1.5 0.0 0
M  V30 8 C 1.299 0.0 0.0 0
M  V30 9 O 5.1106 2.3816 0.0 0
M  V30 10 C 2.6835 2.3816 0.0 0
M  V30 11 C 0.0 -0.75 0.0 0
M  V30 12 C 4.6471 3.8082 0.0 0
M  V30 13 C 3.1471 3.8082 0.0 0
M  V30 14 N -1.299 0.0 0.0 0
M  V30 15 C 0.0 -2.2499 0.0 0
M  V30 16 C 5.5287 5.0217 0.0 0
M  V30 17 C -2.598 -0.7499 0.0 0
M  V30 18 C -1.299 -2.9999 0.0 0
M  V30 19 N -4.0246 -0.2864 0.0 0
M  V30 20 N -2.598 -2.2499 0.0 0
M  V30 21 O -1.299 -4.4999 0.0 0
[truncated: 1,202,174 more chars]
